# Supplementary material for: Leptin Signalling Promotes Axonal Regeneration in the Peripheral and Central Nervous System
Source: Research Square preprint supplement (doi:10.21203/rs.3.rs-2534602/v1), 2023-02-09
Supplement: Supplementary file 1 [file 2f3266bdd888f4446ccb4259.xlsx]

## Sheet: IFvAL RNAseq
GeneID	baseMean	log2FoldChange	lfcSE	stat	pvalue	padj	ensembl_version	ensembl_id	gene_name	chr	start_position	end_position	tss	strand	gene_des
ENSMUSG00000029561.17	2266.92	-0.552663	0.0755765	-7.31263	2.61962e-13	4.76115e-09	ENSMUSG00000029561.17	ENSMUSG00000029561	Oasl2	5	114896936	114912234	114896936	1	2'-5' oligoadenylate synthetase-like 2 [Source:MGI Symbol;Acc:MGI:1344390]
ENSMUSG00000059422.5	27.563	-8.25547	1.298	-6.36013	2.01583e-10	1.83189e-06	ENSMUSG00000059422.5	ENSMUSG00000059422	Gm8116	9	78820638	78821838	78821838	-1	predicted gene 8116 [Source:MGI Symbol;Acc:MGI:3648797]
ENSMUSG00000032269.8	7279.05	0.306766	0.0493044	6.22189	4.91216e-10	2.97595e-06	ENSMUSG00000032269.8	ENSMUSG00000032269	Htr3a	9	48899213	48911099	48911021	-1	5-hydroxytryptamine (serotonin) receptor 3A [Source:MGI Symbol;Acc:MGI:96282]
ENSMUSG00000020893.17	1487.9	0.630352	0.103951	6.06391	1.32855e-09	6.03659e-06	ENSMUSG00000020893.17	ENSMUSG00000020893	Per1	11	69095217	69109960	69095217	1	period circadian clock 1 [Source:MGI Symbol;Acc:MGI:1098283]
ENSMUSG00000052336.7	248.416	-0.978574	0.165086	-5.92766	3.07287e-09	1.11699e-05	ENSMUSG00000052336.7	ENSMUSG00000052336	Cx3cr1	9	119901616	120069879	120068296	-1	chemokine (C-X3-C motif) receptor 1 [Source:MGI Symbol;Acc:MGI:1333815]
ENSMUSG00000086320.1	362.861	-1.21343	0.213652	-5.67946	1.35124e-08	4.09312e-05	ENSMUSG00000086320.1	ENSMUSG00000086320	Gm12840	4	117700188	117700923	117700188	1	predicted gene 12840 [Source:MGI Symbol;Acc:MGI:3650917]
ENSMUSG00000095528.8	14.6538	-21.4731	3.90989	-5.49201	3.97395e-08	0.000103181	ENSMUSG00000095528.8	ENSMUSG00000095528	Gm10375	14	43602627	43608013	43608013	-1	predicted gene 10375 [Source:MGI Symbol;Acc:MGI:3704433]
ENSMUSG00000021186.9	4805.92	-0.266174	0.0493357	-5.39515	6.84671e-08	0.000155549	ENSMUSG00000021186.9	ENSMUSG00000021186	Fbln5	12	101746565	101819055	101819055	-1	fibulin 5 [Source:MGI Symbol;Acc:MGI:1346091]
ENSMUSG00000031431.13	7300.52	0.25164	0.0476366	5.28249	1.27438e-07	0.000257353	ENSMUSG00000031431.13	ENSMUSG00000031431	Tsc22d3	X	140539528	140600659	140542668	-1	TSC22 domain family, member 3 [Source:MGI Symbol;Acc:MGI:1196284]
ENSMUSG00000040488.18	2231.22	0.387288	0.0737938	5.24824	1.53561e-07	0.000279096	ENSMUSG00000040488.18	ENSMUSG00000040488	Ltbp4	7	27305136	27337692	27337692	-1	latent transforming growth factor beta binding protein 4 [Source:MGI Symbol;Acc:MGI:1321395]
ENSMUSG00000071550.14	42.5033	2.00295	0.383042	5.22907	1.70361e-07	0.000281483	ENSMUSG00000071550.14	ENSMUSG00000071550	Cfap44	16	44394796	44482428	44394796	1	cilia and flagella associated protein 44 [Source:MGI Symbol;Acc:MGI:1277238]
ENSMUSG00000060802.8	5441.28	-0.344459	0.0665986	-5.17217	2.31388e-07	0.000336065	ENSMUSG00000060802.8	ENSMUSG00000060802	B2m	2	122147686	122153083	122147686	1	beta-2 microglobulin [Source:MGI Symbol;Acc:MGI:88127]
ENSMUSG00000032812.18	2617	-0.308096	0.0596502	-5.16505	2.40376e-07	0.000336065	ENSMUSG00000032812.18	ENSMUSG00000032812	Arap1	7	101348067	101412586	101348067	1	ArfGAP with RhoGAP domain, ankyrin repeat and PH domain 1 [Source:MGI Symbol;Acc:MGI:1916960]
ENSMUSG00000106874.1	444.907	-0.646208	0.128501	-5.02882	4.93509e-07	0.000640681	ENSMUSG00000106874.1	ENSMUSG00000106874	Gm20186	6	18845910	18848207	18846763	-1	predicted gene, 20186 [Source:MGI Symbol;Acc:MGI:5012371]
ENSMUSG00000030470.15	26.4194	-3.66176	0.733362	-4.99311	5.94154e-07	0.000698433	ENSMUSG00000030470.15	ENSMUSG00000030470	Csrp3	7	48830398	48848033	48843651	-1	cysteine and glycine-rich protein 3 [Source:MGI Symbol;Acc:MGI:1330824]
ENSMUSG00000025283.15	2394.14	-0.43756	0.087749	-4.98649	6.14852e-07	0.000698433	ENSMUSG00000025283.15	ENSMUSG00000025283	Sat1	X	155213132	155216449	155216449	-1	spermidine/spermine N1-acetyl transferase 1 [Source:MGI Symbol;Acc:MGI:98233]
ENSMUSG00000024529.14	1903.25	-0.356093	0.0721175	-4.93768	7.90563e-07	0.000845205	ENSMUSG00000024529.14	ENSMUSG00000024529	Lox	18	52516067	52529867	52529674	-1	lysyl oxidase [Source:MGI Symbol;Acc:MGI:96817]
ENSMUSG00000053907.10	7225	0.197356	0.0403216	4.89456	9.85271e-07	0.00099485	ENSMUSG00000053907.10	ENSMUSG00000053907	Mat2a	6	72432799	72439558	72439556	-1	methionine adenosyltransferase II, alpha [Source:MGI Symbol;Acc:MGI:2443731]
ENSMUSG00000036594.15	1163.06	-0.523149	0.107395	-4.87128	1.10878e-06	0.0010304	ENSMUSG00000036594.15	ENSMUSG00000036594	H2-Aa	17	34282744	34287823	34287823	-1	histocompatibility 2, class II antigen A, alpha [Source:MGI Symbol;Acc:MGI:95895]
ENSMUSG00000046768.13	612.392	-0.531676	0.109266	-4.86591	1.13933e-06	0.0010304	ENSMUSG00000046768.13	ENSMUSG00000046768	Rhoj	12	75308322	75401456	75308322	1	ras homolog family member J [Source:MGI Symbol;Acc:MGI:1931551]
ENSMUSG00000038642.10	347.524	-0.805628	0.165863	-4.8572	1.19056e-06	0.0010304	ENSMUSG00000038642.10	ENSMUSG00000038642	Ctss	3	95526786	95556403	95526786	1	cathepsin S [Source:MGI Symbol;Acc:MGI:107341]
ENSMUSG00000101698.1	30.9772	3.90238	0.816825	4.7775	1.77488e-06	0.00143773	ENSMUSG00000101698.1	ENSMUSG00000101698	Gm29562	9	88827522	88828425	88827522	1	predicted gene 29562 [Source:MGI Symbol;Acc:MGI:5580268]
ENSMUSG00000022324.15	6086.52	-0.283632	0.0594303	-4.77251	1.81942e-06	0.00143773	ENSMUSG00000022324.15	ENSMUSG00000022324	Matn2	15	34306677	34436273	34306677	1	matrilin 2 [Source:MGI Symbol;Acc:MGI:109613]
ENSMUSG00000073421.6	1073.38	-0.468185	0.0984078	-4.7576	1.9591e-06	0.00145855	ENSMUSG00000073421.6	ENSMUSG00000073421	H2-Ab1	17	34257689	34269419	34257689	1	histocompatibility 2, class II antigen A, beta 1 [Source:MGI Symbol;Acc:MGI:103070]
ENSMUSG00000074634.12	986.902	0.480429	0.101083	4.75279	2.00625e-06	0.00145855	ENSMUSG00000074634.12	ENSMUSG00000074634	Tmem267	13	119488039	119611059	119488039	1	transmembrane protein 267 [Source:MGI Symbol;Acc:MGI:3648543]
ENSMUSG00000064360.1	7247.69	-1.10769	0.238398	-4.64639	3.37786e-06	0.00229187	ENSMUSG00000064360.1	ENSMUSG00000064360	mt-Nd3	MT	9459	9806	9459	1	mitochondrially encoded NADH dehydrogenase 3 [Source:MGI Symbol;Acc:MGI:102499]
ENSMUSG00000078636.4	8.87235	-6.63273	1.42933	-4.64044	3.47661e-06	0.00229187	ENSMUSG00000078636.4	ENSMUSG00000078636	Gm7336	7	51746647	51747878	51746647	1	predicted gene 7336 [Source:MGI Symbol;Acc:MGI:3644851]
ENSMUSG00000042626.13	8001.38	-0.351367	0.0757707	-4.63725	3.5308e-06	0.00229187	ENSMUSG00000042626.13	ENSMUSG00000042626	Shc1	3	89418443	89430027	89418443	1	src homology 2 domain-containing transforming protein C1 [Source:MGI Symbol;Acc:MGI:98296]
ENSMUSG00000022032.14	543.068	-0.553122	0.119655	-4.62265	3.78872e-06	0.00237448	ENSMUSG00000022032.14	ENSMUSG00000022032	Scara5	14	65666403	65764826	65666403	1	scavenger receptor class A, member 5 [Source:MGI Symbol;Acc:MGI:1918395]
ENSMUSG00000045930.3	240.681	-0.82169	0.180767	-4.54558	5.47851e-06	0.00331906	ENSMUSG00000045930.3	ENSMUSG00000045930	Clec14a	12	58264720	58269290	58269290	-1	C-type lectin domain family 14, member a [Source:MGI Symbol;Acc:MGI:1914114]
ENSMUSG00000022512.3	968.423	-0.416905	0.092468	-4.50864	6.52432e-06	0.00382005	ENSMUSG00000022512.3	ENSMUSG00000022512	Cldn1	16	26356642	26371841	26371841	-1	claudin 1 [Source:MGI Symbol;Acc:MGI:1276109]
ENSMUSG00000055116.8	247.973	-0.708391	0.157355	-4.50188	6.73565e-06	0.00382005	ENSMUSG00000055116.8	ENSMUSG00000055116	Arntl	7	113207465	113314126	113207465	1	aryl hydrocarbon receptor nuclear translocator-like [Source:MGI Symbol;Acc:MGI:1096381]
ENSMUSG00000024610.15	2845.67	-0.419267	0.093295	-4.49399	6.99e-06	0.00382005	ENSMUSG00000024610.15	ENSMUSG00000024610	Cd74	18	60803848	60812652	60803848	1	CD74 antigen (invariant polypeptide of major histocompatibility complex, class II antigen-associated) [Source:MGI Symbol;Acc:MGI:96534]
ENSMUSG00000038982.10	1326.69	0.35352	0.0787475	4.48929	7.14618e-06	0.00382005	ENSMUSG00000038982.10	ENSMUSG00000038982	Bloc1s5	13	38592842	38635109	38635092	-1	biogenesis of lysosomal organelles complex-1, subunit 5, muted [Source:MGI Symbol;Acc:MGI:2178598]
ENSMUSG00000036887.5	436.197	-0.611784	0.137283	-4.45636	8.33632e-06	0.00431183	ENSMUSG00000036887.5	ENSMUSG00000036887	C1qa	4	136895917	136898803	136898803	-1	complement component 1, q subcomponent, alpha polypeptide [Source:MGI Symbol;Acc:MGI:88223]
ENSMUSG00000037820.15	1006.87	-0.460335	0.103419	-4.45116	8.54062e-06	0.00431183	ENSMUSG00000037820.15	ENSMUSG00000037820	Tgm2	2	158116402	158146436	158146436	-1	transglutaminase 2, C polypeptide [Source:MGI Symbol;Acc:MGI:98731]
ENSMUSG00000021670.14	9335.69	0.208237	0.0470121	4.42943	9.44841e-06	0.00464121	ENSMUSG00000021670.14	ENSMUSG00000021670	Hmgcr	13	96648967	96670936	96670936	-1	3-hydroxy-3-methylglutaryl-Coenzyme A reductase [Source:MGI Symbol;Acc:MGI:96159]
ENSMUSG00000054364.5	6491.02	0.183529	0.0416337	4.4082	1.04234e-05	0.00495429	ENSMUSG00000054364.5	ENSMUSG00000054364	Rhob	12	8497661	8500009	8500009	-1	ras homolog family member B [Source:MGI Symbol;Acc:MGI:107949]
ENSMUSG00000033730.4	318.713	0.820295	0.186581	4.39646	1.10029e-05	0.00495429	ENSMUSG00000033730.4	ENSMUSG00000033730	Egr3	14	70077203	70082614	70077203	1	early growth response 3 [Source:MGI Symbol;Acc:MGI:1306780]
ENSMUSG00000067212.8	613.634	-0.53151	0.120981	-4.39335	1.11617e-05	0.00495429	ENSMUSG00000067212.8	ENSMUSG00000067212	H2-T23	17	36029773	36032855	36032541	-1	histocompatibility 2, T region locus 23 [Source:MGI Symbol;Acc:MGI:95957]
ENSMUSG00000061911.15	6500.07	0.218749	0.0497942	4.39307	1.11761e-05	0.00495429	ENSMUSG00000061911.15	ENSMUSG00000061911	Myt1l	12	29528384	29923213	29528384	1	myelin transcription factor 1-like [Source:MGI Symbol;Acc:MGI:1100511]
ENSMUSG00000043795.10	37.7779	-3.36162	0.768423	-4.3747	1.21597e-05	0.00526197	ENSMUSG00000043795.10	ENSMUSG00000043795	Prr33	7	142491074	142506771	142506771	-1	proline rich 33 [Source:MGI Symbol;Acc:MGI:3642289]
ENSMUSG00000027875.12	4444.51	-0.234909	0.0543862	-4.31927	1.56544e-05	0.00661673	ENSMUSG00000027875.12	ENSMUSG00000027875	Hmgcs2	3	98280435	98310738	98280435	1	3-hydroxy-3-methylglutaryl-Coenzyme A synthase 2 [Source:MGI Symbol;Acc:MGI:101939]
ENSMUSG00000025036.7	207.621	-0.725528	0.168541	-4.30476	1.67164e-05	0.00690501	ENSMUSG00000025036.7	ENSMUSG00000025036	Sfxn2	19	46573365	46598066	46573365	1	sideroflexin 2 [Source:MGI Symbol;Acc:MGI:2137678]
ENSMUSG00000079017.3	261.459	-0.79456	0.18508	-4.29307	1.76219e-05	0.00711727	ENSMUSG00000079017.3	ENSMUSG00000079017	Ifi27l2a	12	103442167	103443680	103443680	-1	interferon, alpha-inducible protein 27 like 2A [Source:MGI Symbol;Acc:MGI:1924183]
ENSMUSG00000021134.17	7998.71	-0.228166	0.053414	-4.27165	1.94034e-05	0.00766647	ENSMUSG00000021134.17	ENSMUSG00000021134	Srsf5	12	80945504	80950507	80945520	1	serine and arginine-rich splicing factor 5 [Source:MGI Symbol;Acc:MGI:98287]
ENSMUSG00000021423.6	3400.5	-0.439699	0.104099	-4.22386	2.40154e-05	0.00919434	ENSMUSG00000021423.6	ENSMUSG00000021423	Ly86	13	37345208	37419036	37345208	1	lymphocyte antigen 86 [Source:MGI Symbol;Acc:MGI:1321404]
ENSMUSG00000073834.10	7.23832	6.26148	1.48553	4.21497	2.49812e-05	0.00919434	ENSMUSG00000073834.10	ENSMUSG00000073834	Mup11	4	60658466	60662411	60662411	-1	major urinary protein 11 [Source:MGI Symbol;Acc:MGI:3709617]
ENSMUSG00000033105.12	2946.44	0.317386	0.0753356	4.21296	2.5204e-05	0.00919434	ENSMUSG00000033105.12	ENSMUSG00000033105	Lss	10	76531588	76557138	76531588	1	lanosterol synthase [Source:MGI Symbol;Acc:MGI:1336155]
ENSMUSG00000070469.12	353.409	-0.577651	0.137389	-4.20449	2.61676e-05	0.00919434	ENSMUSG00000070469.12	ENSMUSG00000070469	Adamtsl3	7	82335694	82614450	82335694	1	ADAMTS-like 3 [Source:MGI Symbol;Acc:MGI:3028499]
ENSMUSG00000097451.11	18734.2	-0.232378	0.0553688	-4.19691	2.70581e-05	0.00919434	ENSMUSG00000097451.11	ENSMUSG00000097451	Rian	12	109603808	109661716	109603808	1	RNA imprinted and accumulated in nucleus [Source:MGI Symbol;Acc:MGI:1922995]
ENSMUSG00000105880.1	7.25547	-6.34506	1.51312	-4.19336	2.74856e-05	0.00919434	ENSMUSG00000105880.1	ENSMUSG00000105880	Gm43678	3	139812111	139812764	139812764	-1	predicted gene 43678 [Source:MGI Symbol;Acc:MGI:5663815]
ENSMUSG00000029096.15	553.306	-0.532357	0.127012	-4.19139	2.77246e-05	0.00919434	ENSMUSG00000029096.15	ENSMUSG00000029096	Htra3	5	35652023	35679782	35679782	-1	HtrA serine peptidase 3 [Source:MGI Symbol;Acc:MGI:1925808]
ENSMUSG00000079227.10	79.3382	-1.93378	0.461514	-4.19007	2.78865e-05	0.00919434	ENSMUSG00000079227.10	ENSMUSG00000079227	Ccr5	9	124121543	124147699	124121543	1	chemokine (C-C motif) receptor 5 [Source:MGI Symbol;Acc:MGI:107182]
ENSMUSG00000037656.9	1289.1	-0.306063	0.0730528	-4.18961	2.79432e-05	0.00919434	ENSMUSG00000037656.9	ENSMUSG00000037656	Slc20a2	8	22476788	22569612	22476788	1	solute carrier family 20, member 2 [Source:MGI Symbol;Acc:MGI:97851]
ENSMUSG00000060586.11	1132.32	-0.378386	0.0904112	-4.18517	2.84956e-05	0.00919434	ENSMUSG00000060586.11	ENSMUSG00000060586	H2-Eb1	17	34305867	34316674	34305867	1	histocompatibility 2, class II antigen E beta [Source:MGI Symbol;Acc:MGI:95901]
ENSMUSG00000033386.10	63.899	1.48714	0.355565	4.18248	2.88351e-05	0.00919434	ENSMUSG00000033386.10	ENSMUSG00000033386	Frrs1	3	116859464	116908177	116859464	1	ferric-chelate reductase 1 [Source:MGI Symbol;Acc:MGI:108076]
ENSMUSG00000039205.16	1639.63	-0.381596	0.0913426	-4.17764	2.94553e-05	0.00923019	ENSMUSG00000039205.16	ENSMUSG00000039205	Ciz1	2	32352327	32380970	32352327	1	CDKN1A interacting zinc finger protein 1 [Source:MGI Symbol;Acc:MGI:1920234]
ENSMUSG00000061983.7	3549.17	-0.302087	0.0727216	-4.15403	3.26676e-05	0.0100633	ENSMUSG00000061983.7	ENSMUSG00000061983	Rps12	10	23785183	23787275	23786802	-1	ribosomal protein S12 [Source:MGI Symbol;Acc:MGI:98105]
ENSMUSG00000026839.17	806.772	-0.395712	0.0955372	-4.14197	3.44341e-05	0.0103319	ENSMUSG00000026839.17	ENSMUSG00000026839	Upp2	2	58567298	58792971	58567298	1	uridine phosphorylase 2 [Source:MGI Symbol;Acc:MGI:1923904]
ENSMUSG00000030760.14	1736.66	0.340363	0.0822062	4.14036	3.46765e-05	0.0103319	ENSMUSG00000030760.14	ENSMUSG00000030760	Acer3	7	98206389	98321208	98309538	-1	alkaline ceramidase 3 [Source:MGI Symbol;Acc:MGI:1913440]
ENSMUSG00000000223.13	10634.2	-0.242527	0.0588909	-4.11825	3.81765e-05	0.0111913	ENSMUSG00000000223.13	ENSMUSG00000000223	Drp2	X	134404551	134456573	134404551	1	dystrophin related protein 2 [Source:MGI Symbol;Acc:MGI:107432]
ENSMUSG00000028957.12	501.208	0.633578	0.15481	4.09262	4.26519e-05	0.0123047	ENSMUSG00000028957.12	ENSMUSG00000028957	Per3	4	151003652	151044665	151044665	-1	period circadian clock 3 [Source:MGI Symbol;Acc:MGI:1277134]
ENSMUSG00000069516.8	1522.87	-0.424971	0.104319	-4.07374	4.62639e-05	0.0131382	ENSMUSG00000069516.8	ENSMUSG00000069516	Lyz2	10	117277331	117282321	117282321	-1	lysozyme 2 [Source:MGI Symbol;Acc:MGI:96897]
ENSMUSG00000048271.14	1668.9	-0.275277	0.067652	-4.06902	4.72111e-05	0.0131426	ENSMUSG00000048271.14	ENSMUSG00000048271	Rbm33	5	28317121	28419239	28317121	1	RNA binding motif protein 33 [Source:MGI Symbol;Acc:MGI:1919670]
ENSMUSG00000024498.16	3126.66	0.229279	0.0563824	4.0665	4.77255e-05	0.0131426	ENSMUSG00000024498.16	ENSMUSG00000024498	Tcerg1	18	42511487	42575793	42511487	1	transcription elongation regulator 1 (CA150) [Source:MGI Symbol;Acc:MGI:1926421]
ENSMUSG00000022548.14	29082	-0.210112	0.0517258	-4.06203	4.86485e-05	0.0131968	ENSMUSG00000022548.14	ENSMUSG00000022548	Apod	16	31296192	31314808	31314808	-1	apolipoprotein D [Source:MGI Symbol;Acc:MGI:88056]
ENSMUSG00000033491.13	2107.63	-0.276263	0.0682763	-4.04625	5.20447e-05	0.0139105	ENSMUSG00000033491.13	ENSMUSG00000033491	Prss35	9	86743649	86758443	86743649	1	protease, serine 35 [Source:MGI Symbol;Acc:MGI:2444800]
ENSMUSG00000070348.5	1537.41	-0.357033	0.0884746	-4.03543	5.45032e-05	0.0141699	ENSMUSG00000070348.5	ENSMUSG00000070348	Ccnd1	7	144929931	144939925	144939869	-1	cyclin D1 [Source:MGI Symbol;Acc:MGI:88313]
ENSMUSG00000019232.14	88.2186	-1.44291	0.357718	-4.03365	5.49177e-05	0.0141699	ENSMUSG00000019232.14	ENSMUSG00000019232	Etnppl	3	130617448	130637521	130617448	1	ethanolamine phosphate phospholyase [Source:MGI Symbol;Acc:MGI:1919010]
ENSMUSG00000018451.7	4626.16	0.29522	0.0732373	4.03101	5.55382e-05	0.0141699	ENSMUSG00000018451.7	ENSMUSG00000018451	6330403K07Rik	11	71031941	71033513	71033513	-1	RIKEN cDNA 6330403K07 gene [Source:MGI Symbol;Acc:MGI:1918001]
ENSMUSG00000064120.14	644.919	0.43068	0.106908	4.0285	5.61338e-05	0.0141699	ENSMUSG00000064120.14	ENSMUSG00000064120	Mocs1	17	49428362	49455435	49428362	1	molybdenum cofactor synthesis 1 [Source:MGI Symbol;Acc:MGI:1928904]
ENSMUSG00000071176.10	3317.65	-0.261137	0.0650238	-4.01603	5.91873e-05	0.0145745	ENSMUSG00000071176.10	ENSMUSG00000071176	Arhgef10	8	14911663	15001085	14911663	1	Rho guanine nucleotide exchange factor (GEF) 10 [Source:MGI Symbol;Acc:MGI:2444453]
ENSMUSG00000039349.5	1340.6	-0.389505	0.0970025	-4.01542	5.93406e-05	0.0145745	ENSMUSG00000039349.5	ENSMUSG00000039349	C130074G19Rik	1	184871926	184883218	184883218	-1	RIKEN cDNA C130074G19 gene [Source:MGI Symbol;Acc:MGI:2444831]
ENSMUSG00000060314.13	838.467	-0.45315	0.112963	-4.01148	6.034e-05	0.0146224	ENSMUSG00000060314.13	ENSMUSG00000060314	Zfp941	7	140807449	140822178	140822178	-1	zinc finger protein 941 [Source:MGI Symbol;Acc:MGI:3039601]
ENSMUSG00000004360.9	3120.48	-0.216854	0.0542839	-3.9948	6.47476e-05	0.015484	ENSMUSG00000004360.9	ENSMUSG00000004360	9330159F19Rik	10	29211606	29230779	29211606	1	RIKEN cDNA 9330159F19 gene [Source:MGI Symbol;Acc:MGI:3036239]
ENSMUSG00000037933.16	4305.79	-0.192713	0.0483887	-3.9826	6.81644e-05	0.0160894	ENSMUSG00000037933.16	ENSMUSG00000037933	Bicd2	13	49341585	49387026	49341585	1	BICD cargo adaptor 2 [Source:MGI Symbol;Acc:MGI:1924145]
ENSMUSG00000032258.15	255.758	0.714276	0.179573	3.97763	6.96063e-05	0.0162192	ENSMUSG00000032258.15	ENSMUSG00000032258	Lca5	9	83390293	83441127	83426961	-1	Leber congenital amaurosis 5 (human) [Source:MGI Symbol;Acc:MGI:1923032]
ENSMUSG00000022053.13	343.415	-0.546716	0.137663	-3.97141	7.14499e-05	0.016438	ENSMUSG00000022053.13	ENSMUSG00000022053	Ebf2	14	67233292	67430918	67233292	1	early B cell factor 2 [Source:MGI Symbol;Acc:MGI:894332]
ENSMUSG00000019846.11	2308.92	-0.342144	0.0862436	-3.96718	7.27292e-05	0.0165232	ENSMUSG00000019846.11	ENSMUSG00000019846	Lama4	10	38965515	39110188	38965515	1	laminin, alpha 4 [Source:MGI Symbol;Acc:MGI:109321]
ENSMUSG00000070576.4	63.8832	-1.56757	0.395553	-3.96297	7.40217e-05	0.0166092	ENSMUSG00000070576.4	ENSMUSG00000070576	Mn1	5	111417362	111457033	111417362	1	meningioma 1 [Source:MGI Symbol;Acc:MGI:1261813]
ENSMUSG00000022297.15	210.226	-0.770134	0.194776	-3.95396	7.68696e-05	0.0170379	ENSMUSG00000022297.15	ENSMUSG00000022297	Fzd6	15	39006034	39038188	39006034	1	frizzled class receptor 6 [Source:MGI Symbol;Acc:MGI:108474]
ENSMUSG00000026904.17	377.643	-0.570092	0.144765	-3.93804	8.21501e-05	0.0179889	ENSMUSG00000026904.17	ENSMUSG00000026904	Slc4a10	2	62046462	62326730	62046462	1	solute carrier family 4, sodium bicarbonate cotransporter-like, member 10 [Source:MGI Symbol;Acc:MGI:2150150]
ENSMUSG00000075602.10	570.589	-0.577643	0.146983	-3.92998	8.49519e-05	0.018381	ENSMUSG00000075602.10	ENSMUSG00000075602	Ly6a	15	74994877	74998031	74997907	-1	lymphocyte antigen 6 complex, locus A [Source:MGI Symbol;Acc:MGI:107527]
ENSMUSG00000078302.5	303.717	-0.539023	0.137507	-3.91996	8.85643e-05	0.0189371	ENSMUSG00000078302.5	ENSMUSG00000078302	Foxd1	13	98354242	98359305	98354242	1	forkhead box D1 [Source:MGI Symbol;Acc:MGI:1347463]
ENSMUSG00000046463.5	17.9804	-2.80871	0.71747	-3.91474	9.05035e-05	0.0191267	ENSMUSG00000046463.5	ENSMUSG00000046463	5930403N24Rik	10	37139402	37151315	37139402	1	RIKEN cDNA 5930403N24 gene [Source:MGI Symbol;Acc:MGI:2444171]
ENSMUSG00000026163.17	2852.26	0.322303	0.0825281	3.90538	9.40776e-05	0.0196536	ENSMUSG00000026163.17	ENSMUSG00000026163	Sphkap	1	83254139	83408200	83408200	-1	SPHK1 interactor, AKAP domain containing [Source:MGI Symbol;Acc:MGI:1924879]
ENSMUSG00000042286.13	767.31	-0.569919	0.146566	-3.88848	0.000100872	0.0207015	ENSMUSG00000042286.13	ENSMUSG00000042286	Stab1	14	31139013	31168641	31139848	-1	stabilin 1 [Source:MGI Symbol;Acc:MGI:2178742]
ENSMUSG00000101780.1	92.4861	-1.05368	0.271146	-3.88604	0.000101895	0.0207015	ENSMUSG00000101780.1	ENSMUSG00000101780	Gm7255	7	47502456	47531784	47531784	-1	predicted gene 7255 [Source:MGI Symbol;Acc:MGI:3779706]
ENSMUSG00000040136.10	602.093	0.482083	0.124102	3.88457	0.000102511	0.0207015	ENSMUSG00000040136.10	ENSMUSG00000040136	Abcc8	7	46104523	46180033	46136629	-1	ATP-binding cassette, sub-family C (CFTR/MRP), member 8 [Source:MGI Symbol;Acc:MGI:1352629]
ENSMUSG00000031660.13	1361.93	-0.321556	0.0830643	-3.87117	0.000108315	0.0216333	ENSMUSG00000031660.13	ENSMUSG00000031660	Brd7	8	88331039	88362194	88362194	-1	bromodomain containing 7 [Source:MGI Symbol;Acc:MGI:1349766]
ENSMUSG00000028524.21	3228.26	0.234085	0.0605422	3.86647	0.00011042	0.0218139	ENSMUSG00000028524.21	ENSMUSG00000028524	Sgip1	4	102741297	102973628	102741297	1	SH3-domain GRB2-like (endophilin) interacting protein 1 [Source:MGI Symbol;Acc:MGI:1920344]
ENSMUSG00000004098.7	4384.67	-0.262572	0.0681211	-3.85449	0.000115971	0.0226642	ENSMUSG00000004098.7	ENSMUSG00000004098	Col5a3	9	20770050	20815067	20815067	-1	collagen, type V, alpha 3 [Source:MGI Symbol;Acc:MGI:1858212]
ENSMUSG00000090877.3	1209.65	-0.384989	0.100197	-3.84233	0.00012187	0.0235636	ENSMUSG00000090877.3	ENSMUSG00000090877	Hspa1b	17	34956436	34959238	34959238	-1	heat shock protein 1B [Source:MGI Symbol;Acc:MGI:99517]
ENSMUSG00000055865.8	1099.04	0.361923	0.0945527	3.82774	0.000129326	0.0246925	ENSMUSG00000055865.8	ENSMUSG00000055865	Tafa3	3	104767406	104781840	104777547	-1	TAFA chemokine like family member 3 [Source:MGI Symbol;Acc:MGI:3046463]
ENSMUSG00000020288.13	2837.7	-0.233198	0.0609564	-3.82565	0.000130425	0.0246925	ENSMUSG00000020288.13	ENSMUSG00000020288	Ahsa2	11	23487882	23498030	23497930	-1	AHA1, activator of heat shock protein ATPase 2 [Source:MGI Symbol;Acc:MGI:1916133]
ENSMUSG00000070436.12	3864.48	-0.280246	0.0733965	-3.81825	0.000134404	0.0251834	ENSMUSG00000070436.12	ENSMUSG00000070436	Serpinh1	7	99345376	99353239	99353114	-1	serine (or cysteine) peptidase inhibitor, clade H, member 1 [Source:MGI Symbol;Acc:MGI:88283]
ENSMUSG00000075569.10	33.7883	1.73569	0.458794	3.78317	0.000154847	0.0285956	ENSMUSG00000075569.10	ENSMUSG00000075569	Rsph10b	5	143933035	143985719	143933062	1	radial spoke head 10 homolog B (Chlamydomonas) [Source:MGI Symbol;Acc:MGI:1922386]
ENSMUSG00000093930.2	42909.7	0.164698	0.0435688	3.78019	0.000156709	0.0285956	ENSMUSG00000093930.2	ENSMUSG00000093930	Hmgcs1	13	119690379	119708260	119690379	1	3-hydroxy-3-methylglutaryl-Coenzyme A synthase 1 [Source:MGI Symbol;Acc:MGI:107592]
ENSMUSG00000039585.15	7876.33	0.252141	0.0667182	3.7792	0.000157335	0.0285956	ENSMUSG00000039585.15	ENSMUSG00000039585	Myo9a	9	59750896	59928866	59750896	1	myosin IXa [Source:MGI Symbol;Acc:MGI:107735]
ENSMUSG00000073902.5	52.8619	-1.41499	0.374689	-3.77643	0.000159093	0.0286289	ENSMUSG00000073902.5	ENSMUSG00000073902	Gm1966	7	106596743	106604035	106604035	-1	predicted gene 1966 [Source:MGI Symbol;Acc:MGI:3584360]
ENSMUSG00000015852.13	195.454	-0.673217	0.179717	-3.74599	0.000179687	0.0320177	ENSMUSG00000015852.13	ENSMUSG00000015852	Fcrls	3	87250758	87263738	87263599	-1	Fc receptor-like S, scavenger receptor [Source:MGI Symbol;Acc:MGI:1933397]
ENSMUSG00000019947.10	1218	0.281605	0.0753384	3.73786	0.000185591	0.0327488	ENSMUSG00000019947.10	ENSMUSG00000019947	Arid5b	10	68092520	68278740	68278740	-1	AT rich interactive domain 5B (MRF1-like) [Source:MGI Symbol;Acc:MGI:2175912]
ENSMUSG00000032280.16	1673.2	0.294709	0.0790861	3.72643	0.000194211	0.0339402	ENSMUSG00000032280.16	ENSMUSG00000032280	Tle3	9	61372366	61418497	61372383	1	transducin-like enhancer of split 3 [Source:MGI Symbol;Acc:MGI:104634]
ENSMUSG00000026463.17	4608.23	0.244734	0.0659604	3.71032	0.000206997	0.0358301	ENSMUSG00000026463.17	ENSMUSG00000026463	Atp2b4	1	133699457	133801041	133801041	-1	ATPase, Ca++ transporting, plasma membrane 4 [Source:MGI Symbol;Acc:MGI:88111]
ENSMUSG00000056966.7	2126.18	-0.356386	0.09615	-3.70656	0.000210092	0.0360228	ENSMUSG00000056966.7	ENSMUSG00000056966	Gjc3	5	137953461	137963098	137963098	-1	gap junction protein, gamma 3 [Source:MGI Symbol;Acc:MGI:2153041]
ENSMUSG00000110631.1	210.002	-0.721912	0.195042	-3.70131	0.000214487	0.0364327	ENSMUSG00000110631.1	ENSMUSG00000110631	Gm42047	8	121833247	121841178	121833247	1	predicted gene, 42047 [Source:MGI Symbol;Acc:MGI:5624932]
ENSMUSG00000032596.14	382.636	-0.647558	0.176144	-3.6763	0.000236643	0.0398239	ENSMUSG00000032596.14	ENSMUSG00000032596	Uba7	9	107975505	107984060	107975505	1	ubiquitin-like modifier activating enzyme 7 [Source:MGI Symbol;Acc:MGI:1349462]
ENSMUSG00000034218.16	1218.82	0.371285	0.101241	3.66735	0.000245077	0.0408649	ENSMUSG00000034218.16	ENSMUSG00000034218	Atm	9	53439149	53536740	53533966	-1	ataxia telangiectasia mutated [Source:MGI Symbol;Acc:MGI:107202]
ENSMUSG00000059325.14	5259.92	0.188316	0.0514163	3.66257	0.000249694	0.0412562	ENSMUSG00000059325.14	ENSMUSG00000059325	Hopx	5	77086988	77115121	77095253	-1	HOP homeobox [Source:MGI Symbol;Acc:MGI:1916782]
ENSMUSG00000026034.17	1766.79	0.42767	0.117036	3.65417	0.000258018	0.0422475	ENSMUSG00000026034.17	ENSMUSG00000026034	Clk1	1	58410189	58424066	58424066	-1	CDC-like kinase 1 [Source:MGI Symbol;Acc:MGI:107403]
ENSMUSG00000036377.19	4256.22	0.181518	0.0497505	3.64857	0.000263707	0.0425054	ENSMUSG00000036377.19	ENSMUSG00000036377	C530008M17Rik	5	76656512	76873554	76657683	1	RIKEN cDNA C530008M17 gene [Source:MGI Symbol;Acc:MGI:2444817]
ENSMUSG00000030786.18	161.01	-0.828	0.226972	-3.64802	0.00026427	0.0425054	ENSMUSG00000030786.18	ENSMUSG00000030786	Itgam	7	128062640	128118491	128062640	1	integrin alpha M [Source:MGI Symbol;Acc:MGI:96607]
ENSMUSG00000001467.5	6525.8	0.232603	0.0638372	3.6437	0.000268752	0.042847	ENSMUSG00000001467.5	ENSMUSG00000001467	Cyp51	5	4081145	4104746	4104746	-1	cytochrome P450, family 51 [Source:MGI Symbol;Acc:MGI:106040]
ENSMUSG00000036905.8	434.179	-0.621464	0.170799	-3.63858	0.000274149	0.0433274	ENSMUSG00000036905.8	ENSMUSG00000036905	C1qb	4	136880129	136886187	136886187	-1	complement component 1, q subcomponent, beta polypeptide [Source:MGI Symbol;Acc:MGI:88224]
ENSMUSG00000042581.14	964.638	0.33649	0.0929102	3.62166	0.000292715	0.0450873	ENSMUSG00000042581.14	ENSMUSG00000042581	Thsd7b	1	129273302	130219278	129273302	1	thrombospondin, type I, domain containing 7B [Source:MGI Symbol;Acc:MGI:2443925]
ENSMUSG00000013089.15	5077.47	-0.301764	0.0833473	-3.62056	0.00029397	0.0450873	ENSMUSG00000013089.15	ENSMUSG00000013089	Etv5	16	22381309	22439719	22439719	-1	ets variant 5 [Source:MGI Symbol;Acc:MGI:1096867]
ENSMUSG00000031144.15	34129.9	0.170314	0.0470472	3.62005	0.000294542	0.0450873	ENSMUSG00000031144.15	ENSMUSG00000031144	Syp	X	7638471	7653256	7638471	1	synaptophysin [Source:MGI Symbol;Acc:MGI:98467]
ENSMUSG00000020717.19	1000.95	-0.430511	0.118943	-3.61947	0.000295207	0.0450873	ENSMUSG00000020717.19	ENSMUSG00000020717	Pecam1	11	106654217	106750628	106715265	-1	platelet/endothelial cell adhesion molecule 1 [Source:MGI Symbol;Acc:MGI:97537]
ENSMUSG00000025492.6	1040.53	-0.427726	0.118404	-3.61243	0.00030334	0.0458533	ENSMUSG00000025492.6	ENSMUSG00000025492	Ifitm3	7	141009586	141010770	141010770	-1	interferon induced transmembrane protein 3 [Source:MGI Symbol;Acc:MGI:1913391]
ENSMUSG00000040552.8	64.3477	-1.18099	0.32724	-3.60895	0.00030744	0.0458533	ENSMUSG00000040552.8	ENSMUSG00000040552	C3ar1	6	122847138	122856161	122856161	-1	complement component 3a receptor 1 [Source:MGI Symbol;Acc:MGI:1097680]
ENSMUSG00000033044.12	42.7364	-2.65432	0.735544	-3.60865	0.000307791	0.0458533	ENSMUSG00000033044.12	ENSMUSG00000033044	Dhrs7c	11	67798187	67816002	67798187	1	dehydrogenase/reductase (SDR family) member 7C [Source:MGI Symbol;Acc:MGI:1915710]
ENSMUSG00000019990.15	568.072	-0.485227	0.134843	-3.59846	0.000320103	0.0472399	ENSMUSG00000019990.15	ENSMUSG00000019990	Pde7b	10	20398004	20725078	20725078	-1	phosphodiesterase 7B [Source:MGI Symbol;Acc:MGI:1352752]
ENSMUSG00000073375.3	16.9306	-3.76853	1.04778	-3.59669	0.000322297	0.0472399	ENSMUSG00000073375.3	ENSMUSG00000073375	Lrrc30	17	67630964	67632723	67632723	-1	leucine rich repeat containing 30 [Source:MGI Symbol;Acc:MGI:2685172]
ENSMUSG00000078193.2	644.779	-0.390328	0.108611	-3.59381	0.000325871	0.0473817	ENSMUSG00000078193.2	ENSMUSG00000078193	Gm2000	1	156366040	156366484	156366040	1	predicted gene 2000 [Source:MGI Symbol;Acc:MGI:3780170]
ENSMUSG00000056602.12	4962.19	0.160599	0.0447419	3.58946	0.000331368	0.0477985	ENSMUSG00000056602.12	ENSMUSG00000056602	Fry	5	150118645	150497753	150118645	1	FRY microtubule binding protein [Source:MGI Symbol;Acc:MGI:2443895]
ENSMUSG00000020522.13	1318.72	0.288233	0.0805589	3.57792	0.000346342	0.0489883	ENSMUSG00000020522.13	ENSMUSG00000020522	Mfap3	11	57518664	57533815	57518664	1	microfibrillar-associated protein 3 [Source:MGI Symbol;Acc:MGI:1924068]
ENSMUSG00000045294.11	5966.02	0.204969	0.0573512	3.57393	0.000351657	0.0489883	ENSMUSG00000045294.11	ENSMUSG00000045294	Insig1	5	28071363	28078662	28071363	1	insulin induced gene 1 [Source:MGI Symbol;Acc:MGI:1916289]
ENSMUSG00000036817.14	3003.33	0.216391	0.0605528	3.5736	0.00035211	0.0489883	ENSMUSG00000036817.14	ENSMUSG00000036817	Sun1	5	139200637	139249840	139200637	1	Sad1 and UNC84 domain containing 1 [Source:MGI Symbol;Acc:MGI:1924303]
ENSMUSG00000049313.8	17368.9	0.145161	0.0406261	3.57311	0.000352769	0.0489883	ENSMUSG00000049313.8	ENSMUSG00000049313	Sorl1	9	41964720	42124297	42124297	-1	sortilin-related receptor, LDLR class A repeats-containing [Source:MGI Symbol;Acc:MGI:1202296]
ENSMUSG00000050666.14	566.026	-0.417313	0.116801	-3.57287	0.000353093	0.0489883	ENSMUSG00000050666.14	ENSMUSG00000050666	Vstm4	14	32856756	32939491	32856756	1	V-set and transmembrane domain containing 4 [Source:MGI Symbol;Acc:MGI:2444633]
ENSMUSG00000032018.14	7401.66	0.170539	0.0477657	3.57032	0.000356543	0.0490922	ENSMUSG00000032018.14	ENSMUSG00000032018	Sc5d	9	42251595	42264256	42264256	-1	sterol-C5-desaturase [Source:MGI Symbol;Acc:MGI:1353611]
ENSMUSG00000046805.10	487.754	-0.450217	0.126795	-3.55076	0.000384126	0.0522769	ENSMUSG00000046805.10	ENSMUSG00000046805	Mpeg1	19	12460779	12465283	12460779	1	macrophage expressed gene 1 [Source:MGI Symbol;Acc:MGI:1333743]
ENSMUSG00000084416.3	1760.11	-0.308406	0.0868783	-3.54987	0.000385425	0.0522769	ENSMUSG00000084416.3	ENSMUSG00000084416	Rpl10a-ps1	1	64993951	64994604	64994604	-1	ribosomal protein L10A, pseudogene 1 [Source:MGI Symbol;Acc:MGI:3705885]
ENSMUSG00000050295.4	309.863	-0.535397	0.151413	-3.536	0.000406235	0.0546912	ENSMUSG00000050295.4	ENSMUSG00000050295	Foxc1	13	31806633	31812476	31806633	1	forkhead box C1 [Source:MGI Symbol;Acc:MGI:1347466]
ENSMUSG00000055210.4	165.204	-0.718577	0.203796	-3.52597	0.00042194	0.0563102	ENSMUSG00000055210.4	ENSMUSG00000055210	Foxd2	4	114906282	114908873	114908873	-1	forkhead box D2 [Source:MGI Symbol;Acc:MGI:1347471]
ENSMUSG00000032554.15	2506.6	-0.355795	0.100952	-3.52439	0.000424457	0.0563102	ENSMUSG00000032554.15	ENSMUSG00000032554	Trf	9	103204001	103230444	103230273	-1	transferrin [Source:MGI Symbol;Acc:MGI:98821]
ENSMUSG00000026222.16	305.349	-0.564016	0.160413	-3.51603	0.000438055	0.056874	ENSMUSG00000026222.16	ENSMUSG00000026222	Sp100	1	85649988	85709998	85649988	1	nuclear antigen Sp100 [Source:MGI Symbol;Acc:MGI:109561]
ENSMUSG00000033863.2	5742.12	0.212111	0.0603347	3.51558	0.000438797	0.056874	ENSMUSG00000033863.2	ENSMUSG00000033863	Klf9	19	23141226	23168134	23141226	1	Kruppel-like factor 9 [Source:MGI Symbol;Acc:MGI:1333856]
ENSMUSG00000037362.8	1083.54	-0.290499	0.0826542	-3.51463	0.000440368	0.056874	ENSMUSG00000037362.8	ENSMUSG00000037362	Ccn3	15	54745702	54754039	54745702	1	cellular communication network factor 3 [Source:MGI Symbol;Acc:MGI:109185]
ENSMUSG00000022965.8	3072.12	-0.243693	0.069347	-3.51411	0.000441223	0.056874	ENSMUSG00000022965.8	ENSMUSG00000022965	Ifngr2	16	91547072	91565623	91547072	1	interferon gamma receptor 2 [Source:MGI Symbol;Acc:MGI:107654]
ENSMUSG00000039849.6	1307.53	-0.249189	0.0710028	-3.50956	0.000448845	0.0574489	ENSMUSG00000039849.6	ENSMUSG00000039849	Pcif1	2	164879304	164894454	164879304	1	PDX1 C-terminal inhibiting factor 1 [Source:MGI Symbol;Acc:MGI:2443858]
ENSMUSG00000066037.14	3027.31	0.189633	0.0540843	3.50624	0.000454486	0.0577642	ENSMUSG00000066037.14	ENSMUSG00000066037	Hnrnpr	4	136310942	136359447	136310942	1	heterogeneous nuclear ribonucleoprotein R [Source:MGI Symbol;Acc:MGI:1891692]
ENSMUSG00000040084.9	208.332	0.831792	0.237383	3.50401	0.000458302	0.0578447	ENSMUSG00000040084.9	ENSMUSG00000040084	Bub1b	2	118598211	118641591	118598211	1	BUB1B, mitotic checkpoint serine/threonine kinase [Source:MGI Symbol;Acc:MGI:1333889]
ENSMUSG00000031558.15	2173.61	0.27817	0.0796404	3.49282	0.000477948	0.0599084	ENSMUSG00000031558.15	ENSMUSG00000031558	Slit2	5	47983138	48307733	47983138	1	slit guidance ligand 2 [Source:MGI Symbol;Acc:MGI:1315205]
ENSMUSG00000020048.13	16368.7	-0.14799	0.0424151	-3.4891	0.000484655	0.0602193	ENSMUSG00000020048.13	ENSMUSG00000020048	Hsp90b1	10	86690209	86705509	86701968	-1	heat shock protein 90, beta (Grp94), member 1 [Source:MGI Symbol;Acc:MGI:98817]
ENSMUSG00000034459.8	985.661	-0.55344	0.15868	-3.48778	0.000487055	0.0602193	ENSMUSG00000034459.8	ENSMUSG00000034459	Ifit1	19	34640871	34650009	34640871	1	interferon-induced protein with tetratricopeptide repeats 1 [Source:MGI Symbol;Acc:MGI:99450]
ENSMUSG00000079484.12	75.5491	-1.04983	0.302667	-3.46859	0.000523194	0.0642504	ENSMUSG00000079484.12	ENSMUSG00000079484	Phyhd1	2	30266203	30282149	30266203	1	phytanoyl-CoA dioxygenase domain containing 1 [Source:MGI Symbol;Acc:MGI:3612860]
ENSMUSG00000079022.10	50.1482	-1.45498	0.420218	-3.46244	0.000535304	0.0652964	ENSMUSG00000079022.10	ENSMUSG00000079022	Col22a1	15	71795795	72034227	71954399	-1	collagen, type XXII, alpha 1 [Source:MGI Symbol;Acc:MGI:1916950]
ENSMUSG00000021898.16	15.6228	-3.92449	1.13627	-3.45384	0.000552665	0.0669646	ENSMUSG00000021898.16	ENSMUSG00000021898	Asb14	14	26894557	26915258	26894557	1	ankyrin repeat and SOCS box-containing 14 [Source:MGI Symbol;Acc:MGI:2655107]
ENSMUSG00000031502.11	8328.98	-0.212155	0.0618013	-3.43285	0.000597271	0.07189	ENSMUSG00000031502.11	ENSMUSG00000031502	Col4a1	8	11198423	11312826	11312826	-1	collagen, type IV, alpha 1 [Source:MGI Symbol;Acc:MGI:88454]
ENSMUSG00000039990.16	787.815	0.342083	0.0998124	3.42726	0.000609703	0.0729037	ENSMUSG00000039990.16	ENSMUSG00000039990	Edrf1	7	133637543	133672971	133637543	1	erythroid differentiation regulatory factor 1 [Source:MGI Symbol;Acc:MGI:1919831]
ENSMUSG00000025873.16	3963.96	0.170938	0.049914	3.42464	0.000615606	0.0731284	ENSMUSG00000025873.16	ENSMUSG00000025873	Faf2	13	54621784	54664063	54621784	1	Fas associated factor family member 2 [Source:MGI Symbol;Acc:MGI:1923827]
ENSMUSG00000047343.4	14.2705	-3.96834	1.16132	-3.41709	0.00063294	0.0739633	ENSMUSG00000047343.4	ENSMUSG00000047343	Mettl21c	1	44009408	44020034	44020006	-1	methyltransferase like 21C [Source:MGI Symbol;Acc:MGI:3611450]
ENSMUSG00000043065.12	490.261	-0.462995	0.135526	-3.41629	0.000634816	0.0739633	ENSMUSG00000043065.12	ENSMUSG00000043065	Spice1	16	44347121	44388497	44347121	1	spindle and centriole associated protein 1 [Source:MGI Symbol;Acc:MGI:1196252]
ENSMUSG00000030996.8	51.2282	-2.25747	0.660799	-3.41627	0.000634844	0.0739633	ENSMUSG00000030996.8	ENSMUSG00000030996	Art1	7	102101743	102113933	102101743	1	ADP-ribosyltransferase 1 [Source:MGI Symbol;Acc:MGI:107511]
ENSMUSG00000099696.6	735.018	-0.33719	0.0989208	-3.40869	0.000652758	0.0755661	ENSMUSG00000099696.6	ENSMUSG00000099696	2900052N01Rik	9	46913493	46927366	46913493	1	RIKEN cDNA 2900052N01 gene [Source:MGI Symbol;Acc:MGI:1920290]
ENSMUSG00000024030.7	3590.91	0.238238	0.0699737	3.40468	0.000662411	0.0761982	ENSMUSG00000024030.7	ENSMUSG00000024030	Abcg1	17	31057675	31117988	31057675	1	ATP binding cassette subfamily G member 1 [Source:MGI Symbol;Acc:MGI:107704]
ENSMUSG00000079018.10	837.784	-0.43875	0.12901	-3.40091	0.000671624	0.0767721	ENSMUSG00000079018.10	ENSMUSG00000079018	Ly6c1	15	75044018	75048830	75048803	-1	lymphocyte antigen 6 complex, locus C1 [Source:MGI Symbol;Acc:MGI:96882]
ENSMUSG00000028396.5	17.7906	-3.13854	0.925718	-3.39039	0.000697945	0.0789171	ENSMUSG00000028396.5	ENSMUSG00000028396	2310002L09Rik	4	73939371	73950846	73941801	-1	RIKEN cDNA 2310002L09 gene [Source:MGI Symbol;Acc:MGI:1916780]
ENSMUSG00000079415.2	1631.61	-0.260757	0.0769208	-3.38994	0.000699073	0.0789171	ENSMUSG00000079415.2	ENSMUSG00000079415	Cntf	19	12763660	12765632	12765632	-1	ciliary neurotrophic factor [Source:MGI Symbol;Acc:MGI:88439]
ENSMUSG00000027656.7	34.9391	-1.38438	0.408975	-3.385	0.000711779	0.0793982	ENSMUSG00000027656.7	ENSMUSG00000027656	Ccn5	2	163820861	163833146	163820889	1	cellular communication network factor 5 [Source:MGI Symbol;Acc:MGI:1328326]
ENSMUSG00000009394.13	11204.5	0.149631	0.0442056	3.38489	0.000712072	0.0793982	ENSMUSG00000009394.13	ENSMUSG00000009394	Syn2	6	115134902	115282006	115134902	1	synapsin II [Source:MGI Symbol;Acc:MGI:103020]
ENSMUSG00000039156.19	2003.29	0.347984	0.103052	3.37677	0.00073342	0.080943	ENSMUSG00000039156.19	ENSMUSG00000039156	Stim2	5	53998499	54121057	53998499	1	stromal interaction molecule 2 [Source:MGI Symbol;Acc:MGI:2151156]
ENSMUSG00000004846.10	2451.76	-0.338075	0.100133	-3.37624	0.000734833	0.080943	ENSMUSG00000004846.10	ENSMUSG00000004846	Plod3	5	136987019	136996648	136987019	1	procollagen-lysine, 2-oxoglutarate 5-dioxygenase 3 [Source:MGI Symbol;Acc:MGI:1347008]
ENSMUSG00000041144.12	172.373	0.663784	0.197172	3.36652	0.000761223	0.0827334	ENSMUSG00000041144.12	ENSMUSG00000041144	Dnah7b	1	46066315	46373550	46066315	1	dynein, axonemal, heavy chain 7B [Source:MGI Symbol;Acc:MGI:2684953]
ENSMUSG00000022587.14	1777.19	-0.31316	0.0930746	-3.36462	0.000766498	0.0827334	ENSMUSG00000022587.14	ENSMUSG00000022587	Ly6e	15	74955051	74959905	74955051	1	lymphocyte antigen 6 complex, locus E [Source:MGI Symbol;Acc:MGI:106651]
ENSMUSG00000038201.10	25.7309	-2.36868	0.704016	-3.36453	0.00076674	0.0827334	ENSMUSG00000038201.10	ENSMUSG00000038201	Kcna7	7	45405653	45409763	45405653	1	potassium voltage-gated channel, shaker-related subfamily, member 7 [Source:MGI Symbol;Acc:MGI:96664]
ENSMUSG00000036256.13	2682.14	-0.317237	0.0943143	-3.36361	0.000769295	0.0827334	ENSMUSG00000036256.13	ENSMUSG00000036256	Igfbp7	5	77349240	77408041	77408041	-1	insulin-like growth factor binding protein 7 [Source:MGI Symbol;Acc:MGI:1352480]
ENSMUSG00000039474.13	4710.78	0.195393	0.0582311	3.35548	0.000792275	0.0847035	ENSMUSG00000039474.13	ENSMUSG00000039474	Wfs1	5	36966104	36989205	36989205	-1	wolframin ER transmembrane glycoprotein [Source:MGI Symbol;Acc:MGI:1328355]
ENSMUSG00000034842.16	2719.71	-0.22009	0.0656339	-3.35329	0.000798573	0.0848776	ENSMUSG00000034842.16	ENSMUSG00000034842	Art3	5	92331827	92414628	92331827	1	ADP-ribosyltransferase 3 [Source:MGI Symbol;Acc:MGI:1202729]
ENSMUSG00000021252.11	894.102	0.293471	0.0876701	3.34744	0.000815609	0.0861843	ENSMUSG00000021252.11	ENSMUSG00000021252	Erg28	12	85815448	85824550	85824522	-1	ergosterol biosynthesis 28 [Source:MGI Symbol;Acc:MGI:1915571]
ENSMUSG00000028583.14	863.302	-0.342692	0.102426	-3.34576	0.000820567	0.086207	ENSMUSG00000028583.14	ENSMUSG00000028583	Pdpn	4	143267431	143299564	143299564	-1	podoplanin [Source:MGI Symbol;Acc:MGI:103098]
ENSMUSG00000037242.8	4977.64	-0.193981	0.0580605	-3.34102	0.000834715	0.0871894	ENSMUSG00000037242.8	ENSMUSG00000037242	Clic4	4	135213969	135272814	135272814	-1	chloride intracellular channel 4 (mitochondrial) [Source:MGI Symbol;Acc:MGI:1352754]
ENSMUSG00000078674.2	4.09917	-5.51937	1.65278	-3.33945	0.00083944	NA	ENSMUSG00000078674.2	ENSMUSG00000078674	Mup18	4	61670177	61674136	61674136	-1	major urinary protein 18 [Source:MGI Symbol;Acc:MGI:3705220]
ENSMUSG00000026924.17	2846.01	0.188522	0.0565021	3.33654	0.000848286	0.0881005	ENSMUSG00000026924.17	ENSMUSG00000026924	Sec16a	2	26409431	26445216	26429512	-1	SEC16 homolog A, endoplasmic reticulum export factor [Source:MGI Symbol;Acc:MGI:2139207]
ENSMUSG00000021466.12	2981.05	-0.233625	0.0701151	-3.33202	0.000862193	0.0890361	ENSMUSG00000021466.12	ENSMUSG00000021466	Ptch1	13	63508328	63573598	63565735	-1	patched 1 [Source:MGI Symbol;Acc:MGI:105373]
ENSMUSG00000024213.14	11737.1	-0.152693	0.0460809	-3.31357	0.000921119	0.0945838	ENSMUSG00000024213.14	ENSMUSG00000024213	Nudt3	17	27579382	27623495	27623495	-1	nudix (nucleotide diphosphate linked moiety X)-type motif 3 [Source:MGI Symbol;Acc:MGI:1928484]
ENSMUSG00000009907.17	7683.77	0.16347	0.0494629	3.3049	0.000950094	0.097011	ENSMUSG00000009907.17	ENSMUSG00000009907	Vps4b	1	106764071	106796728	106796667	-1	vacuolar protein sorting 4B [Source:MGI Symbol;Acc:MGI:1100499]
ENSMUSG00000036435.13	3776.6	0.182733	0.0555139	3.29166	0.000995984	0.101129	ENSMUSG00000036435.13	ENSMUSG00000036435	Exoc1	5	76529311	76570294	76529311	1	exocyst complex component 1 [Source:MGI Symbol;Acc:MGI:2445020]
ENSMUSG00000024998.17	2122.11	-0.318899	0.0969842	-3.28816	0.00100846	0.101826	ENSMUSG00000024998.17	ENSMUSG00000024998	Plce1	19	38481109	38785030	38481109	1	phospholipase C, epsilon 1 [Source:MGI Symbol;Acc:MGI:1921305]
ENSMUSG00000042895.6	20.3331	-3.07156	0.934971	-3.28519	0.00101914	0.102337	ENSMUSG00000042895.6	ENSMUSG00000042895	Abra	15	41864076	41869720	41869720	-1	actin-binding Rho activating protein [Source:MGI Symbol;Acc:MGI:2444891]
ENSMUSG00000033170.14	1069.67	-0.286875	0.087465	-3.27988	0.00103851	0.103364	ENSMUSG00000033170.14	ENSMUSG00000033170	Card10	15	78775138	78803042	78803042	-1	caspase recruitment domain family, member 10 [Source:MGI Symbol;Acc:MGI:2146012]
ENSMUSG00000039519.6	275.446	0.492725	0.150318	3.27789	0.00104588	0.103364	ENSMUSG00000039519.6	ENSMUSG00000039519	Cyp7b1	3	18071950	18243338	18243338	-1	cytochrome P450, family 7, subfamily b, polypeptide 1 [Source:MGI Symbol;Acc:MGI:104978]
ENSMUSG00000020889.11	987.257	-0.340966	0.104043	-3.27715	0.00104859	0.103364	ENSMUSG00000020889.11	ENSMUSG00000020889	Nr1d1	11	98767932	98775333	98775333	-1	nuclear receptor subfamily 1, group D, member 1 [Source:MGI Symbol;Acc:MGI:2444210]
ENSMUSG00000050621.7	2488.18	-0.260737	0.0795852	-3.2762	0.00105213	0.103364	ENSMUSG00000050621.7	ENSMUSG00000050621	Rps27rt	9	114982366	114982739	114982739	-1	ribosomal protein S27, retrogene [Source:MGI Symbol;Acc:MGI:3704345]
ENSMUSG00000066026.14	387.207	-0.416566	0.127334	-3.27144	0.00107002	0.104488	ENSMUSG00000066026.14	ENSMUSG00000066026	Dhrs3	4	144892827	144928209	144893077	1	dehydrogenase/reductase (SDR family) member 3 [Source:MGI Symbol;Acc:MGI:1315215]
ENSMUSG00000093445.7	1528.72	-0.272499	0.0833339	-3.26997	0.0010756	0.104488	ENSMUSG00000093445.7	ENSMUSG00000093445	Lrch4	5	137629121	137641099	137629121	1	leucine-rich repeats and calponin homology (CH) domain containing 4 [Source:MGI Symbol;Acc:MGI:1917193]
ENSMUSG00000033538.13	46.6045	-1.15657	0.353841	-3.2686	0.00108081	0.104488	ENSMUSG00000033538.13	ENSMUSG00000033538	Casp4	9	5308828	5336783	5308828	1	caspase 4, apoptosis-related cysteine peptidase [Source:MGI Symbol;Acc:MGI:107700]
ENSMUSG00000090963.2	72.5285	1.66011	0.508588	3.26416	0.00109788	0.105311	ENSMUSG00000090963.2	ENSMUSG00000090963	Gm17655	5	110046139	110072513	110072513	-1	predicted gene, 17655 [Source:MGI Symbol;Acc:MGI:4937289]
ENSMUSG00000040952.16	3195.33	-0.204329	0.0626126	-3.26338	0.00110091	0.105311	ENSMUSG00000040952.16	ENSMUSG00000040952	Rps19	7	24884371	24889806	24884371	1	ribosomal protein S19 [Source:MGI Symbol;Acc:MGI:1333780]
ENSMUSG00000047786.12	15537.3	-0.156311	0.047944	-3.26029	0.00111299	0.105598	ENSMUSG00000047786.12	ENSMUSG00000047786	Lix1	17	17402672	17459387	17402672	1	limb and CNS expressed 1 [Source:MGI Symbol;Acc:MGI:1913893]
ENSMUSG00000029554.15	1208.41	0.267288	0.0819992	3.25964	0.00111553	0.105598	ENSMUSG00000029554.15	ENSMUSG00000029554	Mad1l1	5	140008689	140321552	140321550	-1	MAD1 mitotic arrest deficient 1-like 1 [Source:MGI Symbol;Acc:MGI:1341857]
ENSMUSG00000035376.10	1627.11	0.37749	0.116147	3.2501	0.00115362	0.108638	ENSMUSG00000035376.10	ENSMUSG00000035376	Hacd2	16	35022428	35109177	35022428	1	3-hydroxyacyl-CoA dehydratase 2 [Source:MGI Symbol;Acc:MGI:1918007]
ENSMUSG00000048249.14	2630.13	0.210945	0.0649642	3.24709	0.00116592	0.108976	ENSMUSG00000048249.14	ENSMUSG00000048249	Crebrf	17	26715650	26776635	26715650	1	CREB3 regulatory factor [Source:MGI Symbol;Acc:MGI:1924378]
ENSMUSG00000026796.16	6268.41	-0.161024	0.0496024	-3.24629	0.0011692	0.108976	ENSMUSG00000026796.16	ENSMUSG00000026796	Fam129b	2	32876114	32925254	32876114	1	family with sequence similarity 129, member B [Source:MGI Symbol;Acc:MGI:2442910]
ENSMUSG00000003923.14	1074.09	0.310783	0.0959709	3.2383	0.00120243	0.111501	ENSMUSG00000003923.14	ENSMUSG00000003923	Tfam	10	71225464	71238280	71238280	-1	transcription factor A, mitochondrial [Source:MGI Symbol;Acc:MGI:107810]
ENSMUSG00000029675.12	814.983	-0.430965	0.133243	-3.23443	0.00121888	0.112452	ENSMUSG00000029675.12	ENSMUSG00000029675	Eln	5	134702593	134747323	134747323	-1	elastin [Source:MGI Symbol;Acc:MGI:95317]
ENSMUSG00000038486.9	3808.28	0.185951	0.0575609	3.2305	0.00123574	0.113432	ENSMUSG00000038486.9	ENSMUSG00000038486	Sv2a	3	96181151	96195521	96181151	1	synaptic vesicle glycoprotein 2 a [Source:MGI Symbol;Acc:MGI:1927139]
ENSMUSG00000032289.15	604.395	-0.335181	0.104044	-3.22153	0.00127508	0.116455	ENSMUSG00000032289.15	ENSMUSG00000032289	Thsd4	9	59966931	60522046	60511035	-1	thrombospondin, type I, domain containing 4 [Source:MGI Symbol;Acc:MGI:2672033]
ENSMUSG00000032599.12	2677.61	0.193808	0.0602875	3.21474	0.00130564	0.11865	ENSMUSG00000032599.12	ENSMUSG00000032599	Ip6k2	9	108783796	108806337	108783796	1	inositol hexaphosphate kinase 2 [Source:MGI Symbol;Acc:MGI:1923750]
ENSMUSG00000073591.4	455.352	0.358251	0.111689	3.20758	0.00133858	0.121039	ENSMUSG00000073591.4	ENSMUSG00000073591	Pcdhb22	18	37517871	37524479	37517871	1	protocadherin beta 22 [Source:MGI Symbol;Acc:MGI:2136760]
ENSMUSG00000064367.1	60561.7	-0.527972	0.164875	-3.20225	0.00136359	0.12253	ENSMUSG00000064367.1	ENSMUSG00000064367	mt-Nd5	MT	11742	13565	11742	1	mitochondrially encoded NADH dehydrogenase 5 [Source:MGI Symbol;Acc:MGI:102496]
ENSMUSG00000027868.11	141.995	-1.20953	0.377836	-3.2012	0.00136856	0.12253	ENSMUSG00000027868.11	ENSMUSG00000027868	Tbx15	3	99240381	99354259	99240381	1	T-box 15 [Source:MGI Symbol;Acc:MGI:1277234]
ENSMUSG00000050288.6	592.611	-0.33367	0.104467	-3.19402	0.00140306	0.125003	ENSMUSG00000050288.6	ENSMUSG00000050288	Fzd2	11	102604396	102608058	102604396	1	frizzled class receptor 2 [Source:MGI Symbol;Acc:MGI:1888513]
ENSMUSG00000046572.10	1445.24	0.256275	0.0804736	3.18459	0.00144961	0.128521	ENSMUSG00000046572.10	ENSMUSG00000046572	Zfp518b	5	38668484	38684826	38684750	-1	zinc finger protein 518B [Source:MGI Symbol;Acc:MGI:2140750]
ENSMUSG00000020064.9	1240.5	-0.243081	0.0763833	-3.18239	0.00146067	0.128872	ENSMUSG00000020064.9	ENSMUSG00000020064	Herc4	10	63243810	63317878	63243810	1	hect domain and RLD 4 [Source:MGI Symbol;Acc:MGI:1914595]
ENSMUSG00000030045.10	1536.22	0.234818	0.0739002	3.1775	0.00148548	0.130428	ENSMUSG00000030045.10	ENSMUSG00000030045	Mrpl19	6	81957851	81965958	81965958	-1	mitochondrial ribosomal protein L19 [Source:MGI Symbol;Acc:MGI:1926274]
ENSMUSG00000050248.11	540.01	-0.331402	0.104608	-3.16803	0.00153477	0.133801	ENSMUSG00000050248.11	ENSMUSG00000050248	Evc2	5	37338499	37425055	37338499	1	EvC ciliary complex subunit 2 [Source:MGI Symbol;Acc:MGI:1915775]
ENSMUSG00000022464.14	51.5053	-1.91247	0.604063	-3.16602	0.00154542	0.133801	ENSMUSG00000022464.14	ENSMUSG00000022464	Slc38a4	15	96994820	97055956	97019951	-1	solute carrier family 38, member 4 [Source:MGI Symbol;Acc:MGI:1916604]
ENSMUSG00000019970.15	1268.84	0.424198	0.133989	3.16591	0.00154598	0.133801	ENSMUSG00000019970.15	ENSMUSG00000019970	Sgk1	10	21882184	21999903	21882184	1	serum/glucocorticoid regulated kinase 1 [Source:MGI Symbol;Acc:MGI:1340062]
ENSMUSG00000033061.15	2586.98	0.198487	0.0627385	3.16371	0.00155772	0.134178	ENSMUSG00000033061.15	ENSMUSG00000033061	Resp18	1	75272199	75278415	75278415	-1	regulated endocrine-specific protein 18 [Source:MGI Symbol;Acc:MGI:1098222]
ENSMUSG00000059401.14	1215.27	0.234427	0.074321	3.15424	0.00160914	0.13793	ENSMUSG00000059401.14	ENSMUSG00000059401	Mamld1	X	71050240	71156056	71050240	1	mastermind-like domain containing 1 [Source:MGI Symbol;Acc:MGI:3045303]
ENSMUSG00000002997.15	16369	-0.114321	0.0362588	-3.15292	0.00161645	0.13793	ENSMUSG00000002997.15	ENSMUSG00000002997	Prkar2b	12	31958476	32061296	32061235	-1	protein kinase, cAMP dependent regulatory, type II beta [Source:MGI Symbol;Acc:MGI:97760]
ENSMUSG00000015501.10	4073.25	0.171549	0.0544758	3.14909	0.00163777	0.139096	ENSMUSG00000015501.10	ENSMUSG00000015501	Hivep2	10	13966075	14151374	13966075	1	human immunodeficiency virus type I enhancer binding protein 2 [Source:MGI Symbol;Acc:MGI:1338076]
ENSMUSG00000026586.16	298.183	-0.461427	0.14672	-3.14495	0.00166116	0.140124	ENSMUSG00000026586.16	ENSMUSG00000026586	Prrx1	1	163245119	163313710	163313672	-1	paired related homeobox 1 [Source:MGI Symbol;Acc:MGI:97712]
ENSMUSG00000049103.14	187.48	-0.710976	0.226122	-3.14422	0.0016653	0.140124	ENSMUSG00000049103.14	ENSMUSG00000049103	Ccr2	9	124101950	124113557	124101950	1	chemokine (C-C motif) receptor 2 [Source:MGI Symbol;Acc:MGI:106185]
ENSMUSG00000052137.11	401.824	0.390574	0.124472	3.13784	0.001702	0.142552	ENSMUSG00000052137.11	ENSMUSG00000052137	Rbm12b2	4	12089439	12096243	12089439	1	RNA binding motif protein 12 B2 [Source:MGI Symbol;Acc:MGI:1924854]
ENSMUSG00000036560.14	4232.47	-0.259613	0.0828248	-3.13449	0.00172153	0.143527	ENSMUSG00000036560.14	ENSMUSG00000036560	Lgi4	7	31059342	31070935	31059342	1	leucine-rich repeat LGI family, member 4 [Source:MGI Symbol;Acc:MGI:2180197]
ENSMUSG00000006369.14	430.856	-0.578977	0.184868	-3.13184	0.00173715	0.143664	ENSMUSG00000006369.14	ENSMUSG00000006369	Fbln1	15	85205949	85286535	85205949	1	fibulin 1 [Source:MGI Symbol;Acc:MGI:95487]
ENSMUSG00000059991.7	6076.57	-0.28163	0.0899337	-3.13153	0.00173899	0.143664	ENSMUSG00000059991.7	ENSMUSG00000059991	Nptx2	5	144545902	144557478	144545902	1	neuronal pentraxin 2 [Source:MGI Symbol;Acc:MGI:1858209]
ENSMUSG00000046714.7	210.196	-0.536326	0.171563	-3.12612	0.0017713	0.145573	ENSMUSG00000046714.7	ENSMUSG00000046714	Foxc2	8	121116171	121118895	121116171	1	forkhead box C2 [Source:MGI Symbol;Acc:MGI:1347481]
ENSMUSG00000036502.14	11632.9	0.161636	0.0517236	3.12499	0.00177811	0.145573	ENSMUSG00000036502.14	ENSMUSG00000036502	Tmem255a	X	38196573	38252439	38252429	-1	transmembrane protein 255A [Source:MGI Symbol;Acc:MGI:3045722]
ENSMUSG00000064341.1	65764.7	-0.539892	0.173303	-3.11532	0.00183748	0.149759	ENSMUSG00000064341.1	ENSMUSG00000064341	mt-Nd1	MT	2751	3707	2751	1	mitochondrially encoded NADH dehydrogenase 1 [Source:MGI Symbol;Acc:MGI:101787]
ENSMUSG00000100162.2	30.8392	1.51273	0.487565	3.10263	0.00191809	0.155631	ENSMUSG00000100162.2	ENSMUSG00000100162	Gm20687	14	55054945	55098986	55054945	1	predicted gene 20687 [Source:MGI Symbol;Acc:MGI:5313134]
ENSMUSG00000021546.18	14578.8	0.136377	0.0440114	3.09869	0.00194381	0.156567	ENSMUSG00000021546.18	ENSMUSG00000021546	Hnrnpk	13	58391142	58403343	58403343	-1	heterogeneous nuclear ribonucleoprotein K [Source:MGI Symbol;Acc:MGI:99894]
ENSMUSG00000033981.14	1461.72	0.226718	0.073177	3.09822	0.00194686	0.156567	ENSMUSG00000033981.14	ENSMUSG00000033981	Gria2	3	80681450	80802835	80802835	-1	glutamate receptor, ionotropic, AMPA2 (alpha 2) [Source:MGI Symbol;Acc:MGI:95809]
ENSMUSG00000020038.10	622.206	0.300793	0.0972445	3.09316	0.00198034	0.15828	ENSMUSG00000020038.10	ENSMUSG00000020038	Cry1	10	85131700	85185064	85185064	-1	cryptochrome 1 (photolyase-like) [Source:MGI Symbol;Acc:MGI:1270841]
ENSMUSG00000024232.2	488.307	0.352432	0.113971	3.09229	0.00198621	0.15828	ENSMUSG00000024232.2	ENSMUSG00000024232	Bambi	18	3507923	3516404	3507923	1	BMP and activin membrane-bound inhibitor [Source:MGI Symbol;Acc:MGI:1915260]
ENSMUSG00000064345.1	46293	-0.575917	0.186316	-3.09108	0.00199429	0.15828	ENSMUSG00000064345.1	ENSMUSG00000064345	mt-Nd2	MT	3914	4951	3914	1	mitochondrially encoded NADH dehydrogenase 2 [Source:MGI Symbol;Acc:MGI:102500]
ENSMUSG00000073295.4	1163.59	0.2425	0.0784913	3.08951	0.00200487	0.158428	ENSMUSG00000073295.4	ENSMUSG00000073295	Nudt11	X	6047453	6055110	6047453	1	nudix (nucleoside diphosphate linked moiety X)-type motif 11 [Source:MGI Symbol;Acc:MGI:1930957]
ENSMUSG00000022342.6	2235.04	-0.209184	0.067749	-3.08763	0.00201761	0.158539	ENSMUSG00000022342.6	ENSMUSG00000022342	Kcnv1	15	45106284	45114920	45114827	-1	potassium channel, subfamily V, member 1 [Source:MGI Symbol;Acc:MGI:1914748]
ENSMUSG00000028834.13	44.2208	-3.90448	1.26509	-3.08633	0.00202645	0.158539	ENSMUSG00000028834.13	ENSMUSG00000028834	Trim63	4	134315120	134329629	134315122	1	tripartite motif-containing 63 [Source:MGI Symbol;Acc:MGI:2447992]
ENSMUSG00000025078.9	959.57	0.293953	0.0952707	3.08545	0.00203244	0.158539	ENSMUSG00000025078.9	ENSMUSG00000025078	Nhlrc2	19	56548261	56603503	56548261	1	NHL repeat containing 2 [Source:MGI Symbol;Acc:MGI:1914116]
ENSMUSG00000039316.14	100.413	-0.8594	0.278968	-3.08064	0.00206556	0.160318	ENSMUSG00000039316.14	ENSMUSG00000039316	Rftn1	17	49992257	50190674	50190674	-1	raftlin lipid raft linker 1 [Source:MGI Symbol;Acc:MGI:1923688]
ENSMUSG00000038168.5	402.056	-0.388985	0.126311	-3.07959	0.00207288	0.160318	ENSMUSG00000038168.5	ENSMUSG00000038168	P3h2	16	25959288	26105784	26105784	-1	prolyl 3-hydroxylase 2 [Source:MGI Symbol;Acc:MGI:2146663]
ENSMUSG00000035486.14	261.243	-0.498209	0.16196	-3.07612	0.00209713	0.160337	ENSMUSG00000035486.14	ENSMUSG00000035486	Plk5	10	80356459	80365489	80356459	1	polo like kinase 5 [Source:MGI Symbol;Acc:MGI:3026984]
ENSMUSG00000041119.12	78.576	-1.06255	0.345493	-3.07545	0.00210182	0.160337	ENSMUSG00000041119.12	ENSMUSG00000041119	Pde9a	17	31386210	31476310	31386210	1	phosphodiesterase 9A [Source:MGI Symbol;Acc:MGI:1277179]
ENSMUSG00000041607.17	57940.8	-0.192312	0.0625374	-3.07515	0.00210398	0.160337	ENSMUSG00000041607.17	ENSMUSG00000041607	Mbp	18	82475146	82585637	82475146	1	myelin basic protein [Source:MGI Symbol;Acc:MGI:96925]
ENSMUSG00000031871.9	1103.11	-0.289678	0.0942191	-3.07452	0.00210842	0.160337	ENSMUSG00000031871.9	ENSMUSG00000031871	Cdh5	8	104101625	104144511	104101625	1	cadherin 5 [Source:MGI Symbol;Acc:MGI:105057]
ENSMUSG00000010608.15	3980.31	0.183832	0.0598317	3.07248	0.00212287	0.160432	ENSMUSG00000010608.15	ENSMUSG00000010608	Rbm25	12	83631236	83683123	83631236	1	RNA binding motif protein 25 [Source:MGI Symbol;Acc:MGI:1914289]
ENSMUSG00000045392.8	40.137	-1.15865	0.377313	-3.07079	0.00213492	0.160432	ENSMUSG00000045392.8	ENSMUSG00000045392	Olfr1033	2	86020633	86045171	86020633	1	olfactory receptor 1033 [Source:MGI Symbol;Acc:MGI:3030867]
ENSMUSG00000060550.16	152.539	-0.745906	0.242917	-3.07062	0.00213615	0.160432	ENSMUSG00000060550.16	ENSMUSG00000060550	H2-Q7	17	35439155	35443773	35439155	1	histocompatibility 2, Q region locus 7 [Source:MGI Symbol;Acc:MGI:95936]
ENSMUSG00000029862.16	55.435	-1.73511	0.566085	-3.0651	0.00217599	0.162358	ENSMUSG00000029862.16	ENSMUSG00000029862	Clcn1	6	42286685	42315756	42286685	1	chloride channel, voltage-sensitive 1 [Source:MGI Symbol;Acc:MGI:88417]
ENSMUSG00000029683.7	41.5345	-2.13702	0.697324	-3.06459	0.00217966	0.162358	ENSMUSG00000029683.7	ENSMUSG00000029683	Lmod2	6	24597762	24605414	24597762	1	leiomodin 2 (cardiac) [Source:MGI Symbol;Acc:MGI:2135672]
ENSMUSG00000026510.10	828.039	0.275588	0.0900209	3.06138	0.0022032	0.162857	ENSMUSG00000026510.10	ENSMUSG00000026510	Trp53bp2	1	182409172	182462432	182409172	1	transformation related protein 53 binding protein 2 [Source:MGI Symbol;Acc:MGI:2138319]
ENSMUSG00000025270.13	318.563	0.669816	0.218806	3.06123	0.00220428	0.162857	ENSMUSG00000025270.13	ENSMUSG00000025270	Alas2	X	150547375	150570638	150547375	1	aminolevulinic acid synthase 2, erythroid [Source:MGI Symbol;Acc:MGI:87990]
ENSMUSG00000023153.9	16.0427	-3.07274	1.00535	-3.05638	0.00224028	0.164847	ENSMUSG00000023153.9	ENSMUSG00000023153	Tmem52	4	155469114	155470858	155469114	1	transmembrane protein 52 [Source:MGI Symbol;Acc:MGI:1916921]
ENSMUSG00000033088.19	852.338	-0.374053	0.122528	-3.05281	0.00226712	0.165239	ENSMUSG00000033088.19	ENSMUSG00000033088	Triobp	15	78947724	79005869	78947724	1	TRIO and F-actin binding protein [Source:MGI Symbol;Acc:MGI:1349410]
ENSMUSG00000006221.7	101.133	-1.28948	0.422421	-3.05261	0.00226864	0.165239	ENSMUSG00000006221.7	ENSMUSG00000006221	Hspb7	4	141420779	141425311	141420779	1	heat shock protein family, member 7 (cardiovascular) [Source:MGI Symbol;Acc:MGI:1352494]
ENSMUSG00000049556.5	4394.83	0.153522	0.0503263	3.05053	0.00228436	0.165239	ENSMUSG00000049556.5	ENSMUSG00000049556	Lingo1	9	56618475	56796468	56796138	-1	leucine rich repeat and Ig domain containing 1 [Source:MGI Symbol;Acc:MGI:1915522]
ENSMUSG00000115801.1	207.828	-0.616186	0.202031	-3.04996	0.00228872	0.165239	ENSMUSG00000115801.1	ENSMUSG00000115801	AC160336.1	14	44544055	44637201	44637201	-1	novel transcript
ENSMUSG00000058818.13	116.81	-0.717078	0.235211	-3.04866	0.00229868	0.165239	ENSMUSG00000058818.13	ENSMUSG00000058818	Pirb	7	3711409	3720391	3720382	-1	paired Ig-like receptor B [Source:MGI Symbol;Acc:MGI:894311]
ENSMUSG00000105388.1	249.316	-0.903638	0.296424	-3.04846	0.00230016	0.165239	ENSMUSG00000105388.1	ENSMUSG00000105388	Rpl36a-ps2	3	145879020	145879340	145879020	1	ribosomal protein L36A, pseudogene 2 [Source:MGI Symbol;Acc:MGI:3780887]
ENSMUSG00000028581.17	504.121	-0.390804	0.12837	-3.04437	0.00233172	0.166846	ENSMUSG00000028581.17	ENSMUSG00000028581	Laptm5	4	130913125	130936141	130913125	1	lysosomal-associated protein transmembrane 5 [Source:MGI Symbol;Acc:MGI:108046]
ENSMUSG00000002633.4	1379.91	0.277115	0.0911142	3.04141	0.00235475	0.167834	ENSMUSG00000002633.4	ENSMUSG00000002633	Shh	5	28456815	28467256	28467256	-1	sonic hedgehog [Source:MGI Symbol;Acc:MGI:98297]
ENSMUSG00000035469.17	3790.62	0.182441	0.0600162	3.03986	0.00236691	0.168041	ENSMUSG00000035469.17	ENSMUSG00000035469	Rcbtb1	14	59201209	59237265	59201209	1	regulator of chromosome condensation (RCC1) and BTB (POZ) domain containing protein 1 [Source:MGI Symbol;Acc:MGI:1918580]
ENSMUSG00000064294.12	25.1064	-1.5283	0.503146	-3.0375	0.00238553	0.168454	ENSMUSG00000064294.12	ENSMUSG00000064294	Aox3	1	58113130	58200698	58113130	1	aldehyde oxidase 3 [Source:MGI Symbol;Acc:MGI:1918974]
ENSMUSG00000064363.1	91343	-0.52827	0.173958	-3.03677	0.00239126	0.168454	ENSMUSG00000064363.1	ENSMUSG00000064363	mt-Nd4	MT	10167	11544	10167	1	mitochondrially encoded NADH dehydrogenase 4 [Source:MGI Symbol;Acc:MGI:102498]
ENSMUSG00000025743.14	14033.2	-0.12603	0.0415627	-3.03229	0.00242706	0.169663	ENSMUSG00000025743.14	ENSMUSG00000025743	Sdc3	4	130792537	130826319	130792537	1	syndecan 3 [Source:MGI Symbol;Acc:MGI:1349163]
ENSMUSG00000018822.7	7473.67	-0.166039	0.0547569	-3.03229	0.00242709	0.169663	ENSMUSG00000018822.7	ENSMUSG00000018822	Sfrp5	19	42197971	42202252	42202252	-1	secreted frizzled-related sequence protein 5 [Source:MGI Symbol;Acc:MGI:1860298]
ENSMUSG00000018909.15	22664.4	-0.167628	0.0553464	-3.02871	0.00245602	0.170935	ENSMUSG00000018909.15	ENSMUSG00000018909	Arrb1	7	99535466	99606771	99535466	1	arrestin, beta 1 [Source:MGI Symbol;Acc:MGI:99473]
ENSMUSG00000037426.18	5521.38	0.196455	0.0649144	3.02638	0.00247503	0.170935	ENSMUSG00000037426.18	ENSMUSG00000037426	Depdc5	5	32863701	32994236	32863721	1	DEP domain containing 5 [Source:MGI Symbol;Acc:MGI:2141101]
ENSMUSG00000030324.8	134.355	1.02808	0.339734	3.02612	0.00247715	0.170935	ENSMUSG00000030324.8	ENSMUSG00000030324	Rho	6	115931748	115940036	115931748	1	rhodopsin [Source:MGI Symbol;Acc:MGI:97914]
ENSMUSG00000036446.5	1665.9	0.194094	0.0641545	3.02542	0.00248291	0.170935	ENSMUSG00000036446.5	ENSMUSG00000036446	Lum	10	97565128	97572703	97565128	1	lumican [Source:MGI Symbol;Acc:MGI:109347]
ENSMUSG00000064368.1	455.097	-0.560692	0.185439	-3.02359	0.00249798	0.171324	ENSMUSG00000064368.1	ENSMUSG00000064368	mt-Nd6	MT	13552	14070	14070	-1	mitochondrially encoded NADH dehydrogenase 6 [Source:MGI Symbol;Acc:MGI:102495]
ENSMUSG00000034163.10	2094.19	-0.257512	0.0852972	-3.019	0.00253611	0.17272	ENSMUSG00000034163.10	ENSMUSG00000034163	Zfc3h1	10	115384959	115432772	115384959	1	zinc finger, C3H1-type containing [Source:MGI Symbol;Acc:MGI:2446143]
ENSMUSG00000092274.3	6516.66	-0.225224	0.0746308	-3.01784	0.00254582	0.17272	ENSMUSG00000092274.3	ENSMUSG00000092274	Neat1	19	5824708	5845478	5845478	-1	nuclear paraspeckle assembly transcript 1 (non-protein coding) [Source:MGI Symbol;Acc:MGI:1914211]
ENSMUSG00000068196.5	773.235	-0.348894	0.115615	-3.01772	0.00254684	0.17272	ENSMUSG00000068196.5	ENSMUSG00000068196	Col8a1	16	57624258	57754737	57754737	-1	collagen, type VIII, alpha 1 [Source:MGI Symbol;Acc:MGI:88463]
ENSMUSG00000029513.14	422.903	-0.384351	0.127593	-3.01232	0.0025926	0.175169	ENSMUSG00000029513.14	ENSMUSG00000029513	Prkab1	5	116013586	116024508	116024462	-1	protein kinase, AMP-activated, beta 1 non-catalytic subunit [Source:MGI Symbol;Acc:MGI:1336167]
ENSMUSG00000079363.7	137.88	-0.666858	0.221641	-3.00872	0.00262348	0.176276	ENSMUSG00000079363.7	ENSMUSG00000079363	Gbp4	5	105115767	105139586	105139586	-1	guanylate binding protein 4 [Source:MGI Symbol;Acc:MGI:97072]
ENSMUSG00000031391.18	27488.8	0.129088	0.0429168	3.00787	0.00263085	0.176276	ENSMUSG00000031391.18	ENSMUSG00000031391	L1cam	X	73853778	73896105	73869905	-1	L1 cell adhesion molecule [Source:MGI Symbol;Acc:MGI:96721]
ENSMUSG00000024913.16	805.783	-0.306326	0.10187	-3.00704	0.00263808	0.176276	ENSMUSG00000024913.16	ENSMUSG00000024913	Lrp5	19	3584828	3686564	3686556	-1	low density lipoprotein receptor-related protein 5 [Source:MGI Symbol;Acc:MGI:1278315]
ENSMUSG00000100750.1	1420.52	0.29887	0.0994615	3.00488	0.00265686	0.176881	ENSMUSG00000100750.1	ENSMUSG00000100750	Gm29084	1	62534491	62535942	62535942	-1	predicted gene 29084 [Source:MGI Symbol;Acc:MGI:5579790]
ENSMUSG00000022802.2	1674.91	0.203363	0.0677563	3.00139	0.00268753	0.178269	ENSMUSG00000022802.2	ENSMUSG00000022802	Lmln	16	33062521	33127695	33062521	1	leishmanolysin-like (metallopeptidase M8 family) [Source:MGI Symbol;Acc:MGI:2444736]
ENSMUSG00000073418.4	2345.77	-0.239468	0.0798346	-2.99956	0.00270374	0.178693	ENSMUSG00000073418.4	ENSMUSG00000073418	C4b	17	34728380	34743882	34729265	-1	complement component 4B (Chido blood group) [Source:MGI Symbol;Acc:MGI:88228]
ENSMUSG00000042305.12	3792.46	-0.2507	0.0836521	-2.99694	0.00272708	0.179582	ENSMUSG00000042305.12	ENSMUSG00000042305	Tmem183a	1	134346097	134361979	134361979	-1	transmembrane protein 183A [Source:MGI Symbol;Acc:MGI:1914729]
ENSMUSG00000055026.13	103.625	0.854662	0.285744	2.991	0.00278061	0.182446	ENSMUSG00000055026.13	ENSMUSG00000055026	Gabrg3	7	56716465	57387188	57387188	-1	gamma-aminobutyric acid (GABA) A receptor, subunit gamma 3 [Source:MGI Symbol;Acc:MGI:95624]
ENSMUSG00000041592.16	982.448	0.275806	0.0924489	2.98334	0.00285125	0.18605	ENSMUSG00000041592.16	ENSMUSG00000041592	Sdk2	11	113776374	114067046	114066218	-1	sidekick cell adhesion molecule 2 [Source:MGI Symbol;Acc:MGI:2443847]
ENSMUSG00000029049.14	129.657	0.694838	0.232946	2.98283	0.00285601	0.18605	ENSMUSG00000029049.14	ENSMUSG00000029049	Morn1	4	155086577	155145505	155086577	1	MORN repeat containing 1 [Source:MGI Symbol;Acc:MGI:1924116]
ENSMUSG00000033728.14	1857.54	0.201367	0.0675906	2.97922	0.00288982	0.186655	ENSMUSG00000033728.14	ENSMUSG00000033728	Lrrc14	15	76710623	76717699	76710623	1	leucine rich repeat containing 14 [Source:MGI Symbol;Acc:MGI:2445060]
ENSMUSG00000015467.14	1580.25	-0.247749	0.0832058	-2.97754	0.00290568	0.186655	ENSMUSG00000015467.14	ENSMUSG00000015467	Egfl8	17	34613349	34615971	34615320	-1	EGF-like domain 8 [Source:MGI Symbol;Acc:MGI:1932094]
ENSMUSG00000023236.7	2617.1	0.185008	0.0621354	2.9775	0.00290607	0.186655	ENSMUSG00000023236.7	ENSMUSG00000023236	Scg5	2	113776362	113829121	113829121	-1	secretogranin V [Source:MGI Symbol;Acc:MGI:98289]
ENSMUSG00000041528.15	4384.08	0.161189	0.0541582	2.97627	0.00291782	0.186655	ENSMUSG00000041528.15	ENSMUSG00000041528	Rnf123	9	108051534	108083346	108083346	-1	ring finger protein 123 [Source:MGI Symbol;Acc:MGI:2148796]
ENSMUSG00000020101.14	244.143	-0.59988	0.201579	-2.9759	0.00292131	0.186655	ENSMUSG00000020101.14	ENSMUSG00000020101	Vsir	10	60346851	60372684	60346851	1	V-set immunoregulatory receptor [Source:MGI Symbol;Acc:MGI:1921298]
ENSMUSG00000071347.3	36.7007	-1.24457	0.418299	-2.97531	0.00292692	0.186655	ENSMUSG00000071347.3	ENSMUSG00000071347	C1qtnf9	14	60768134	60780869	60768134	1	C1q and tumor necrosis factor related protein 9 [Source:MGI Symbol;Acc:MGI:3045252]
ENSMUSG00000035929.11	585.517	-0.434906	0.14653	-2.96804	0.00299707	0.190461	ENSMUSG00000035929.11	ENSMUSG00000035929	H2-Q4	17	35379617	35385290	35379617	1	histocompatibility 2, Q region locus 4 [Source:MGI Symbol;Acc:MGI:95933]
ENSMUSG00000046062.5	2604.2	0.168884	0.0570629	2.95961	0.00308028	0.195067	ENSMUSG00000046062.5	ENSMUSG00000046062	Ppp1r15b	1	133131143	133139783	133131143	1	protein phosphatase 1, regulatory subunit 15B [Source:MGI Symbol;Acc:MGI:2444211]
ENSMUSG00000050105.5	75.0092	-0.792546	0.267953	-2.95778	0.00309868	0.195463	ENSMUSG00000050105.5	ENSMUSG00000050105	Grrp1	4	134251110	134254106	134254106	-1	glycine/arginine rich protein 1 [Source:MGI Symbol;Acc:MGI:1919940]
ENSMUSG00000070498.3	618.398	0.308725	0.10441	2.95684	0.00310805	0.195463	ENSMUSG00000070498.3	ENSMUSG00000070498	Tmem132b	5	125531774	125792583	125531774	1	transmembrane protein 132B [Source:MGI Symbol;Acc:MGI:3609245]
ENSMUSG00000028684.14	2585.75	0.185222	0.0627	2.9541	0.00313585	0.196259	ENSMUSG00000028684.14	ENSMUSG00000028684	Urod	4	116989965	116994413	116994413	-1	uroporphyrinogen decarboxylase [Source:MGI Symbol;Acc:MGI:98916]
ENSMUSG00000025498.15	285.862	-0.537618	0.18203	-2.95346	0.0031423	0.196259	ENSMUSG00000025498.15	ENSMUSG00000025498	Irf7	7	141262706	141266481	141266421	-1	interferon regulatory factor 7 [Source:MGI Symbol;Acc:MGI:1859212]
ENSMUSG00000016559.14	6712.99	-0.147655	0.0500461	-2.95039	0.00317375	0.197544	ENSMUSG00000016559.14	ENSMUSG00000016559	H3f3b	11	116021912	116027962	116027962	-1	H3.3 histone B [Source:MGI Symbol;Acc:MGI:1101768]
ENSMUSG00000023960.13	7414.16	0.161064	0.0546499	2.9472	0.0032067	0.198131	ENSMUSG00000023960.13	ENSMUSG00000023960	Enpp5	17	44078813	44086567	44078813	1	ectonucleotide pyrophosphatase/phosphodiesterase 5 [Source:MGI Symbol;Acc:MGI:1933830]
ENSMUSG00000015647.9	599.482	-0.573238	0.194511	-2.94707	0.00320796	0.198131	ENSMUSG00000015647.9	ENSMUSG00000015647	Lama5	2	180176373	180225859	180179643	-1	laminin, alpha 5 [Source:MGI Symbol;Acc:MGI:105382]
ENSMUSG00000043629.12	784.025	-0.264442	0.0897747	-2.94562	0.0032231	0.198131	ENSMUSG00000043629.12	ENSMUSG00000043629	1700019D03Rik	1	52922324	53020179	52952844	-1	RIKEN cDNA 1700019D03 gene [Source:MGI Symbol;Acc:MGI:1914330]
ENSMUSG00000041329.13	3677.64	-0.204008	0.0692665	-2.94526	0.00322679	0.198131	ENSMUSG00000041329.13	ENSMUSG00000041329	Atp1b2	11	69599736	69605942	69605829	-1	ATPase, Na+/K+ transporting, beta 2 polypeptide [Source:MGI Symbol;Acc:MGI:88109]
ENSMUSG00000039109.16	327.504	-0.47206	0.160527	-2.94068	0.0032749	0.200408	ENSMUSG00000039109.16	ENSMUSG00000039109	F13a1	13	36867178	37050244	37049288	-1	coagulation factor XIII, A1 subunit [Source:MGI Symbol;Acc:MGI:1921395]
ENSMUSG00000009741.15	1766.81	0.318941	0.108538	2.93852	0.00329781	0.200736	ENSMUSG00000009741.15	ENSMUSG00000009741	Ubp1	9	113930934	113977202	113931435	1	upstream binding protein 1 [Source:MGI Symbol;Acc:MGI:104889]
ENSMUSG00000020722.5	24.5192	-2.29643	0.781606	-2.9381	0.00330234	0.200736	ENSMUSG00000020722.5	ENSMUSG00000020722	Cacng1	11	107703218	107716522	107716522	-1	calcium channel, voltage-dependent, gamma subunit 1 [Source:MGI Symbol;Acc:MGI:1206582]
ENSMUSG00000016763.15	678.665	-0.295811	0.100737	-2.93647	0.00331974	0.201077	ENSMUSG00000016763.15	ENSMUSG00000016763	Scube1	15	83604999	83725021	83725021	-1	signal peptide, CUB domain, EGF-like 1 [Source:MGI Symbol;Acc:MGI:1890616]
ENSMUSG00000028778.15	229.286	-0.458948	0.156344	-2.9355	0.00333008	0.201077	ENSMUSG00000028778.15	ENSMUSG00000028778	Hcrtr1	4	130130217	130139359	130138551	-1	hypocretin (orexin) receptor 1 [Source:MGI Symbol;Acc:MGI:2385650]
ENSMUSG00000003814.8	15721.9	-0.148625	0.0507178	-2.93043	0.00338496	0.201699	ENSMUSG00000003814.8	ENSMUSG00000003814	Calr	8	84841850	84846934	84846826	-1	calreticulin [Source:MGI Symbol;Acc:MGI:88252]
ENSMUSG00000064370.1	110625	-0.511446	0.174552	-2.93004	0.00338919	0.201699	ENSMUSG00000064370.1	ENSMUSG00000064370	mt-Cytb	MT	14145	15288	14145	1	mitochondrially encoded cytochrome b [Source:MGI Symbol;Acc:MGI:102501]
ENSMUSG00000020810.5	2803.31	0.178784	0.0610278	2.92954	0.00339462	0.201699	ENSMUSG00000020810.5	ENSMUSG00000020810	Cygb	11	116645595	116654313	116654313	-1	cytoglobin [Source:MGI Symbol;Acc:MGI:2149481]
ENSMUSG00000045083.14	895.377	0.272181	0.0929732	2.92753	0.00341671	0.201699	ENSMUSG00000045083.14	ENSMUSG00000045083	Lingo2	4	35706647	36951747	35845204	-1	leucine rich repeat and Ig domain containing 2 [Source:MGI Symbol;Acc:MGI:2442298]
ENSMUSG00000037031.10	2756.93	-0.170598	0.0582746	-2.92748	0.00341726	0.201699	ENSMUSG00000037031.10	ENSMUSG00000037031	Tspan15	10	62185396	62231251	62231251	-1	tetraspanin 15 [Source:MGI Symbol;Acc:MGI:1917673]
ENSMUSG00000003992.15	2678.95	0.173903	0.0594056	2.92739	0.00341825	0.201699	ENSMUSG00000003992.15	ENSMUSG00000003992	Ssbp2	13	91460283	91703429	91460283	1	single-stranded DNA binding protein 2 [Source:MGI Symbol;Acc:MGI:1914220]
ENSMUSG00000022999.15	585.359	-0.309473	0.105728	-2.92707	0.00342168	0.201699	ENSMUSG00000022999.15	ENSMUSG00000022999	Lmbr1l	15	98903917	98918231	98918231	-1	limb region 1 like [Source:MGI Symbol;Acc:MGI:1289247]
ENSMUSG00000042761.14	248.568	0.513751	0.175616	2.92542	0.00343996	0.201699	ENSMUSG00000042761.14	ENSMUSG00000042761	Mrap2	9	87144306	87184045	87144306	1	melanocortin 2 receptor accessory protein 2 [Source:MGI Symbol;Acc:MGI:3609239]
ENSMUSG00000029648.13	1258.11	-0.332071	0.113528	-2.925	0.00344453	0.201699	ENSMUSG00000029648.13	ENSMUSG00000029648	Flt1	5	147561604	147726011	147726011	-1	FMS-like tyrosine kinase 1 [Source:MGI Symbol;Acc:MGI:95558]
ENSMUSG00000039221.10	1215.58	-0.236528	0.0808861	-2.92421	0.0034533	0.201699	ENSMUSG00000039221.10	ENSMUSG00000039221	Rpl22l1	3	28805436	28807424	28805436	1	ribosomal protein L22 like 1 [Source:MGI Symbol;Acc:MGI:1915278]
ENSMUSG00000071172.13	4641.07	0.143987	0.049259	2.92306	0.00346611	0.201699	ENSMUSG00000071172.13	ENSMUSG00000071172	Srsf3	17	29032628	29043373	29032628	1	serine and arginine-rich splicing factor 3 [Source:MGI Symbol;Acc:MGI:98285]
ENSMUSG00000018893.15	353.609	-2.56148	0.8765	-2.92239	0.00347355	0.201699	ENSMUSG00000018893.15	ENSMUSG00000018893	Mb	15	77015487	77050670	77050670	-1	myoglobin [Source:MGI Symbol;Acc:MGI:96922]
ENSMUSG00000022330.5	53.4643	-1.07439	0.368017	-2.91939	0.00350714	0.202008	ENSMUSG00000022330.5	ENSMUSG00000022330	Osr2	15	35296098	35303305	35296098	1	odd-skipped related 2 [Source:MGI Symbol;Acc:MGI:1930813]
ENSMUSG00000062753.14	1847.65	-0.214273	0.0733978	-2.91934	0.00350771	0.202008	ENSMUSG00000062753.14	ENSMUSG00000062753	AI413582	17	27563573	27565756	27565756	-1	expressed sequence AI413582 [Source:MGI Symbol;Acc:MGI:2146839]
ENSMUSG00000025407.7	337.024	-0.409544	0.140306	-2.91894	0.00351222	0.202008	ENSMUSG00000025407.7	ENSMUSG00000025407	Gli1	10	127329882	127341974	127341974	-1	GLI-Kruppel family member GLI1 [Source:MGI Symbol;Acc:MGI:95727]
ENSMUSG00000031519.4	45.1107	-1.94369	0.666599	-2.91583	0.00354744	0.20339	ENSMUSG00000031519.4	ENSMUSG00000031519	Asb5	8	54529580	54587875	54529580	1	ankyrin repeat and SOCs box-containing 5 [Source:MGI Symbol;Acc:MGI:1923544]
ENSMUSG00000069917.7	8001.45	0.835812	0.286956	2.91269	0.00358334	0.204622	ENSMUSG00000069917.7	ENSMUSG00000069917	Hba-a2	11	32296489	32297298	32296489	1	hemoglobin alpha, adult chain 2 [Source:MGI Symbol;Acc:MGI:96016]
ENSMUSG00000032186.15	20716.7	-0.111008	0.0381211	-2.91198	0.00359144	0.204622	ENSMUSG00000032186.15	ENSMUSG00000032186	Tmod2	9	75565621	75611325	75611303	-1	tropomodulin 2 [Source:MGI Symbol;Acc:MGI:1355335]
ENSMUSG00000038437.11	3153.02	-0.201002	0.0691008	-2.90883	0.00362787	0.205693	ENSMUSG00000038437.11	ENSMUSG00000038437	Mllt6	11	97663414	97685463	97663414	1	myeloid/lymphoid or mixed-lineage leukemia; translocated to, 6 [Source:MGI Symbol;Acc:MGI:1935145]
ENSMUSG00000072623.6	1069.12	0.240928	0.0828387	2.9084	0.00363287	0.205693	ENSMUSG00000072623.6	ENSMUSG00000072623	Zfp9	6	118461950	118479320	118479320	-1	zinc finger protein 9 [Source:MGI Symbol;Acc:MGI:99210]
ENSMUSG00000042828.12	53.0575	-1.85835	0.639884	-2.90419	0.003682	0.207827	ENSMUSG00000042828.12	ENSMUSG00000042828	Trim72	7	128003949	128011033	128003949	1	tripartite motif-containing 72 [Source:MGI Symbol;Acc:MGI:3612190]
ENSMUSG00000022995.16	12726.5	0.185667	0.0639972	2.90117	0.0037177	0.209192	ENSMUSG00000022995.16	ENSMUSG00000022995	Enah	1	181896384	182019990	182019661	-1	ENAH actin regulator [Source:MGI Symbol;Acc:MGI:108360]
ENSMUSG00000021835.15	86.7563	-0.775635	0.267518	-2.89938	0.00373906	0.209745	ENSMUSG00000021835.15	ENSMUSG00000021835	Bmp4	14	46383520	46390669	46390669	-1	bone morphogenetic protein 4 [Source:MGI Symbol;Acc:MGI:88180]
ENSMUSG00000071042.12	184.451	-0.810385	0.279717	-2.89716	0.00376562	0.210585	ENSMUSG00000071042.12	ENSMUSG00000071042	Rasgrp3	17	75435896	75529054	75435896	1	RAS, guanyl releasing protein 3 [Source:MGI Symbol;Acc:MGI:3028579]
ENSMUSG00000021579.4	81.9205	-0.979447	0.338931	-2.88981	0.0038547	0.214047	ENSMUSG00000021579.4	ENSMUSG00000021579	Lrrc14b	13	74359578	74364005	74364005	-1	leucine rich repeat containing 14B [Source:MGI Symbol;Acc:MGI:2145269]
ENSMUSG00000020155.2	2105.03	0.245441	0.0849681	2.88862	0.00386933	0.214047	ENSMUSG00000020155.2	ENSMUSG00000020155	Kcnmb1	11	33963013	33973641	33963013	1	potassium large conductance calcium-activated channel, subfamily M, beta member 1 [Source:MGI Symbol;Acc:MGI:1334203]
ENSMUSG00000027176.8	1069.14	-0.233427	0.080815	-2.88841	0.00387198	0.214047	ENSMUSG00000027176.8	ENSMUSG00000027176	Cstf3	2	104590523	104665429	104590523	1	cleavage stimulation factor, 3' pre-RNA, subunit 3 [Source:MGI Symbol;Acc:MGI:1351825]
ENSMUSG00000023007.15	1745.29	0.182317	0.0631932	2.88507	0.00391326	0.214047	ENSMUSG00000023007.15	ENSMUSG00000023007	Prpf40b	15	99295087	99317018	99295087	1	pre-mRNA processing factor 40B [Source:MGI Symbol;Acc:MGI:1925583]
ENSMUSG00000028841.14	13.0972	-2.36377	0.819403	-2.88474	0.00391738	0.214047	ENSMUSG00000028841.14	ENSMUSG00000028841	Cnksr1	4	134228041	134238399	134238399	-1	connector enhancer of kinase suppressor of Ras 1 [Source:MGI Symbol;Acc:MGI:2670958]
ENSMUSG00000041707.8	19.1551	-1.785	0.618949	-2.88392	0.00392762	0.214047	ENSMUSG00000041707.8	ENSMUSG00000041707	Tmem273	14	32785963	32817984	32785963	1	transmembrane protein 273 [Source:MGI Symbol;Acc:MGI:1916319]
ENSMUSG00000038235.4	470.114	-0.465633	0.16147	-2.88371	0.0039302	0.214047	ENSMUSG00000038235.4	ENSMUSG00000038235	F11r	1	171437535	171464603	171437535	1	F11 receptor [Source:MGI Symbol;Acc:MGI:1321398]
ENSMUSG00000036251.16	2555.18	0.201937	0.0700297	2.8836	0.00393164	0.214047	ENSMUSG00000036251.16	ENSMUSG00000036251	Trpm8	1	88277661	88389293	88277661	1	transient receptor potential cation channel, subfamily M, member 8 [Source:MGI Symbol;Acc:MGI:2181435]
ENSMUSG00000060126.14	17348.1	-0.12669	0.043938	-2.88338	0.00393429	0.214047	ENSMUSG00000060126.14	ENSMUSG00000060126	Tpt1	14	75845093	75848525	75845093	1	tumor protein, translationally-controlled 1 [Source:MGI Symbol;Acc:MGI:104890]
ENSMUSG00000031808.7	3226.19	-0.227012	0.0787551	-2.8825	0.00394529	0.214047	ENSMUSG00000031808.7	ENSMUSG00000031808	Slc27a1	8	71568882	71587302	71568882	1	solute carrier family 27 (fatty acid transporter), member 1 [Source:MGI Symbol;Acc:MGI:1347098]
ENSMUSG00000031821.11	140.508	0.94676	0.328949	2.87813	0.00400035	0.216388	ENSMUSG00000031821.11	ENSMUSG00000031821	Gins2	8	120578633	120589304	120588980	-1	GINS complex subunit 2 (Psf2 homolog) [Source:MGI Symbol;Acc:MGI:1921019]
ENSMUSG00000032060.10	6045.65	-0.215013	0.0747396	-2.87683	0.00401692	0.216639	ENSMUSG00000032060.10	ENSMUSG00000032060	Cryab	9	50751325	50756636	50751325	1	crystallin, alpha B [Source:MGI Symbol;Acc:MGI:88516]
ENSMUSG00000046470.5	180.371	-0.517646	0.180045	-2.87509	0.00403918	0.217196	ENSMUSG00000046470.5	ENSMUSG00000046470	Sox18	2	181669836	181671640	181671640	-1	SRY (sex determining region Y)-box 18 [Source:MGI Symbol;Acc:MGI:103559]
ENSMUSG00000026640.12	7759.26	0.136447	0.0474862	2.87341	0.0040607	0.217285	ENSMUSG00000026640.12	ENSMUSG00000026640	Plxna2	1	194618218	194816869	194618218	1	plexin A2 [Source:MGI Symbol;Acc:MGI:107684]
ENSMUSG00000039004.6	361.308	-0.400086	0.139279	-2.87254	0.00407187	0.217285	ENSMUSG00000039004.6	ENSMUSG00000039004	Bmp6	13	38345107	38500302	38345107	1	bone morphogenetic protein 6 [Source:MGI Symbol;Acc:MGI:88182]
ENSMUSG00000034731.11	42639	0.134423	0.046802	2.87216	0.0040767	0.217285	ENSMUSG00000034731.11	ENSMUSG00000034731	Dgkh	14	78558750	78732776	78732776	-1	diacylglycerol kinase, eta [Source:MGI Symbol;Acc:MGI:2444188]
ENSMUSG00000004044.9	3482.99	-0.149147	0.0519704	-2.86985	0.00410667	0.217921	ENSMUSG00000004044.9	ENSMUSG00000004044	Cavin1	11	100956733	100970887	100970887	-1	caveolae associated 1 [Source:MGI Symbol;Acc:MGI:1277968]
ENSMUSG00000096764.1	359.022	0.408803	0.14247	2.86939	0.00411262	0.217921	ENSMUSG00000096764.1	ENSMUSG00000096764	Gm21985	2	112266314	112406319	112266314	1	predicted gene 21985 [Source:MGI Symbol;Acc:MGI:5439454]
ENSMUSG00000032572.9	15.4542	-2.08937	0.728568	-2.86778	0.00413365	0.21825	ENSMUSG00000032572.9	ENSMUSG00000032572	Col6a4	9	105989454	106096783	105998322	-1	collagen, type VI, alpha 4 [Source:MGI Symbol;Acc:MGI:1915803]
ENSMUSG00000021130.8	1275.62	-0.212229	0.0740229	-2.86707	0.00414286	0.21825	ENSMUSG00000021130.8	ENSMUSG00000021130	Galnt16	12	80518277	80630972	80518277	1	polypeptide N-acetylgalactosaminyltransferase 16 [Source:MGI Symbol;Acc:MGI:1917754]
ENSMUSG00000110234.2	130.664	0.992532	0.346516	2.86432	0.00417905	0.219521	ENSMUSG00000110234.2	ENSMUSG00000110234	Gm45799	7	105640552	105684439	105640552	1	predicted gene 45799 [Source:MGI Symbol;Acc:MGI:5804914]
ENSMUSG00000061533.16	290.742	0.504429	0.176363	2.86018	0.00423398	0.221291	ENSMUSG00000061533.16	ENSMUSG00000061533	Cep128	12	90998492	91384409	91266933	-1	centrosomal protein 128 [Source:MGI Symbol;Acc:MGI:1922466]
ENSMUSG00000063171.4	1375.38	0.255801	0.0894642	2.85925	0.00424645	0.221291	ENSMUSG00000063171.4	ENSMUSG00000063171	Rps4l	6	148354656	148355598	148354656	1	ribosomal protein S4-like [Source:MGI Symbol;Acc:MGI:1913434]
ENSMUSG00000096719.1	693.41	-0.365404	0.127869	-2.85764	0.00426811	0.221291	ENSMUSG00000096719.1	ENSMUSG00000096719	Mrgpra2b	7	47463806	47528862	47489586	-1	MAS-related GPR, member A2B [Source:MGI Symbol;Acc:MGI:3033098]
ENSMUSG00000028889.17	659.862	-0.322114	0.112727	-2.85746	0.00427051	0.221291	ENSMUSG00000028889.17	ENSMUSG00000028889	Yrdc	4	124850679	124855242	124850679	1	yrdC domain containing (E.coli) [Source:MGI Symbol;Acc:MGI:2387201]
ENSMUSG00000038936.13	3840.36	0.159678	0.0558855	2.85723	0.00427363	0.221291	ENSMUSG00000038936.13	ENSMUSG00000038936	Sccpdh	1	179668210	179687189	179668210	1	saccharopine dehydrogenase (putative) [Source:MGI Symbol;Acc:MGI:1924486]
ENSMUSG00000037239.8	657.382	-0.31613	0.110795	-2.8533	0.00432684	0.22341	ENSMUSG00000037239.8	ENSMUSG00000037239	Spred3	7	29158829	29170411	29168647	-1	sprouty-related EVH1 domain containing 3 [Source:MGI Symbol;Acc:MGI:2142186]
ENSMUSG00000030666.11	4335.49	-0.194472	0.0682257	-2.85042	0.00436611	0.224799	ENSMUSG00000030666.11	ENSMUSG00000030666	Calcb	7	114718643	114723365	114718643	1	calcitonin-related polypeptide, beta [Source:MGI Symbol;Acc:MGI:2151254]
ENSMUSG00000110591.1	3.22643	-5.17568	1.81688	-2.84866	0.00439037	NA	ENSMUSG00000110591.1	ENSMUSG00000110591	Gm31371	8	19903392	19925713	19903392	1	predicted gene, 31371 [Source:MGI Symbol;Acc:MGI:5590530]
ENSMUSG00000031398.13	1072.4	-0.256177	0.0900302	-2.84546	0.00443479	0.227159	ENSMUSG00000031398.13	ENSMUSG00000031398	Plxna3	X	74329066	74344689	74329066	1	plexin A3 [Source:MGI Symbol;Acc:MGI:107683]
ENSMUSG00000024810.16	225.906	-0.46201	0.162377	-2.8453	0.00443695	0.227159	ENSMUSG00000024810.16	ENSMUSG00000024810	Il33	19	29925114	29960718	29925114	1	interleukin 33 [Source:MGI Symbol;Acc:MGI:1924375]
ENSMUSG00000079470.8	455.105	0.365802	0.128648	2.84343	0.00446308	0.227855	ENSMUSG00000079470.8	ENSMUSG00000079470	Utp14b	1	78658038	78671512	78658038	1	UTP14B small subunit processome component [Source:MGI Symbol;Acc:MGI:2445092]
ENSMUSG00000073940.3	1599.59	0.866579	0.305019	2.84107	0.0044963	0.228747	ENSMUSG00000073940.3	ENSMUSG00000073940	Hbb-bt	7	103812524	103813996	103813996	-1	hemoglobin, beta adult t chain [Source:MGI Symbol;Acc:MGI:5474850]
ENSMUSG00000052560.15	1936.26	-0.201016	0.0708053	-2.83899	0.00452561	0.228747	ENSMUSG00000052560.15	ENSMUSG00000052560	Cpne8	15	90487482	90679432	90679371	-1	copine VIII [Source:MGI Symbol;Acc:MGI:1914121]
ENSMUSG00000005417.17	19908.4	-0.115624	0.0407311	-2.83872	0.00452947	0.228747	ENSMUSG00000005417.17	ENSMUSG00000005417	Mprip	11	59661305	59780860	59661305	1	myosin phosphatase Rho interacting protein [Source:MGI Symbol;Acc:MGI:1349438]
ENSMUSG00000038276.12	5274.51	0.178234	0.0627888	2.83862	0.00453089	0.228747	ENSMUSG00000038276.12	ENSMUSG00000038276	Asic3	5	24413392	24417835	24413392	1	acid-sensing (proton-gated) ion channel 3 [Source:MGI Symbol;Acc:MGI:2159339]
ENSMUSG00000028348.7	28.7403	-1.83423	0.646787	-2.83591	0.00456956	0.229091	ENSMUSG00000028348.7	ENSMUSG00000028348	Cavin4	4	48663514	48673502	48663514	1	caveolae associated 4 [Source:MGI Symbol;Acc:MGI:1915266]
ENSMUSG00000003429.11	5634	-0.164196	0.0579056	-2.83558	0.00457428	0.229091	ENSMUSG00000003429.11	ENSMUSG00000003429	Rps11	7	45122379	45124439	45124439	-1	ribosomal protein S11 [Source:MGI Symbol;Acc:MGI:1351329]
ENSMUSG00000028222.2	2538.65	0.286695	0.101123	2.83513	0.00458077	0.229091	ENSMUSG00000028222.2	ENSMUSG00000028222	Calb1	4	15881264	15908064	15881264	1	calbindin 1 [Source:MGI Symbol;Acc:MGI:88248]
ENSMUSG00000028370.7	693.476	-0.476803	0.168207	-2.83461	0.00458812	0.229091	ENSMUSG00000028370.7	ENSMUSG00000028370	Pappa	4	65124174	65357509	65124174	1	pregnancy-associated plasma protein A [Source:MGI Symbol;Acc:MGI:97479]
ENSMUSG00000020044.13	13061	-0.141211	0.0498452	-2.833	0.00461132	0.229259	ENSMUSG00000020044.13	ENSMUSG00000020044	Timp3	10	86300372	86349506	86300372	1	tissue inhibitor of metalloproteinase 3 [Source:MGI Symbol;Acc:MGI:98754]
ENSMUSG00000074890.4	448.109	-0.318137	0.112312	-2.83263	0.00461672	0.229259	ENSMUSG00000074890.4	ENSMUSG00000074890	Lcmt2	2	121128307	121140653	121140653	-1	leucine carboxyl methyltransferase 2 [Source:MGI Symbol;Acc:MGI:1353659]
ENSMUSG00000056656.6	210.291	0.469134	0.165753	2.83032	0.00465019	0.230081	ENSMUSG00000056656.6	ENSMUSG00000056656	Apol8	15	77747798	77757003	77755273	-1	apolipoprotein L 8 [Source:MGI Symbol;Acc:MGI:2444921]
ENSMUSG00000036281.13	736.962	-0.294018	0.103914	-2.82943	0.00466315	0.230081	ENSMUSG00000036281.13	ENSMUSG00000036281	Snapc4	2	26362765	26380653	26380649	-1	small nuclear RNA activating complex, polypeptide 4 [Source:MGI Symbol;Acc:MGI:2443935]
ENSMUSG00000069919.7	3952.95	0.824372	0.291414	2.82887	0.00467125	0.230081	ENSMUSG00000069919.7	ENSMUSG00000069919	Hba-a1	11	32283511	32284465	32283511	1	hemoglobin alpha, adult chain 1 [Source:MGI Symbol;Acc:MGI:96015]
ENSMUSG00000042523.12	1660.73	0.183473	0.0649019	2.82694	0.00469958	0.230851	ENSMUSG00000042523.12	ENSMUSG00000042523	Dnal1	12	84114366	84147498	84114371	1	dynein, axonemal, light chain 1 [Source:MGI Symbol;Acc:MGI:1921462]
ENSMUSG00000113949.1	1627.12	-0.213556	0.0755983	-2.82487	0.00472994	0.231342	ENSMUSG00000113949.1	ENSMUSG00000113949	Scamp4	10	80602872	80615783	80602872	1	secretory carrier membrane protein 4 [Source:MGI Symbol;Acc:MGI:1928947]
ENSMUSG00000059291.15	6123.11	-0.136276	0.0482607	-2.82374	0.00474668	0.231342	ENSMUSG00000059291.15	ENSMUSG00000059291	Rpl11	4	136028265	136053428	136028798	-1	ribosomal protein L11 [Source:MGI Symbol;Acc:MGI:1914275]
ENSMUSG00000078349.3	223.92	-0.478412	0.169447	-2.82337	0.00475219	0.231342	ENSMUSG00000078349.3	ENSMUSG00000078349	AW011738	4	156203270	156210563	156203270	1	expressed sequence AW011738 [Source:MGI Symbol;Acc:MGI:2140540]
ENSMUSG00000000325.16	3336.35	-0.149546	0.0529778	-2.82281	0.0047605	0.231342	ENSMUSG00000000325.16	ENSMUSG00000000325	Arvcf	16	18348182	18407076	18348182	1	armadillo repeat gene deleted in velocardiofacial syndrome [Source:MGI Symbol;Acc:MGI:109620]
ENSMUSG00000033446.7	124.537	-0.611983	0.217136	-2.81843	0.00482588	0.233894	ENSMUSG00000033446.7	ENSMUSG00000033446	Lpar6	14	73237895	73243294	73237895	1	lysophosphatidic acid receptor 6 [Source:MGI Symbol;Acc:MGI:1914418]
ENSMUSG00000049775.16	29242.3	-0.143426	0.0509143	-2.817	0.00484745	0.234315	ENSMUSG00000049775.16	ENSMUSG00000049775	Tmsb4x	X	167207093	167209315	167209315	-1	thymosin, beta 4, X chromosome [Source:MGI Symbol;Acc:MGI:99510]
ENSMUSG00000022023.6	4857.2	0.12989	0.0461639	2.81368	0.00489781	0.236121	ENSMUSG00000022023.6	ENSMUSG00000022023	Wbp4	14	79459937	79481520	79481520	-1	WW domain binding protein 4 [Source:MGI Symbol;Acc:MGI:109568]
ENSMUSG00000021702.7	508.373	-0.343212	0.122078	-2.81142	0.0049324	0.237072	ENSMUSG00000021702.7	ENSMUSG00000021702	Thbs4	13	92751590	92794818	92794818	-1	thrombospondin 4 [Source:MGI Symbol;Acc:MGI:1101779]
ENSMUSG00000024140.10	7857.71	-0.152359	0.0542071	-2.81068	0.00494362	0.237072	ENSMUSG00000024140.10	ENSMUSG00000024140	Epas1	17	86753700	86833410	86753700	1	endothelial PAS domain protein 1 [Source:MGI Symbol;Acc:MGI:109169]
ENSMUSG00000040612.13	537.117	-0.323426	0.115148	-2.80878	0.0049729	0.237703	ENSMUSG00000040612.13	ENSMUSG00000040612	Ildr2	1	166254139	166316823	166254139	1	immunoglobulin-like domain containing receptor 2 [Source:MGI Symbol;Acc:MGI:1196370]
ENSMUSG00000001918.17	1614.75	-0.208207	0.0741441	-2.80814	0.00498293	0.237703	ENSMUSG00000001918.17	ENSMUSG00000001918	Slc1a5	7	16781340	16798274	16781340	1	solute carrier family 1 (neutral amino acid transporter), member 5 [Source:MGI Symbol;Acc:MGI:105305]
ENSMUSG00000071714.7	89.8197	-0.749302	0.267104	-2.80528	0.00502732	0.239193	ENSMUSG00000071714.7	ENSMUSG00000071714	Csf2rb2	15	78282507	78305721	78305721	-1	colony stimulating factor 2 receptor, beta 2, low-affinity (granulocyte-macrophage) [Source:MGI Symbol;Acc:MGI:1339760]
ENSMUSG00000029723.16	3445.28	-0.166828	0.0594898	-2.80431	0.00504246	0.239286	ENSMUSG00000029723.16	ENSMUSG00000029723	Tsc22d4	5	137745730	137768450	137745730	1	TSC22 domain family, member 4 [Source:MGI Symbol;Acc:MGI:1926079]
ENSMUSG00000021613.9	1434	0.21551	0.0769228	2.80164	0.00508434	0.239998	ENSMUSG00000021613.9	ENSMUSG00000021613	Hapln1	13	89539796	89611652	89539796	1	hyaluronan and proteoglycan link protein 1 [Source:MGI Symbol;Acc:MGI:1337006]
ENSMUSG00000022898.13	1913.37	0.181814	0.0649075	2.80113	0.00509236	0.239998	ENSMUSG00000022898.13	ENSMUSG00000022898	Vps26c	16	94497783	94526830	94526830	-1	VPS26 endosomal protein sorting factor C [Source:MGI Symbol;Acc:MGI:1206040]
ENSMUSG00000039182.6	978.04	0.229172	0.0818226	2.80083	0.00509707	0.239998	ENSMUSG00000039182.6	ENSMUSG00000039182	AW209491	13	14630154	14639096	14630154	1	expressed sequence AW209491 [Source:MGI Symbol;Acc:MGI:2145422]
ENSMUSG00000041571.9	16234.6	-0.133166	0.0475712	-2.79929	0.00512147	0.240004	ENSMUSG00000041571.9	ENSMUSG00000041571	Selenow	7	15917208	15922402	15922402	-1	selenoprotein W [Source:MGI Symbol;Acc:MGI:1100878]
ENSMUSG00000025902.13	246.126	-0.418253	0.149421	-2.79916	0.0051236	0.240004	ENSMUSG00000025902.13	ENSMUSG00000025902	Sox17	1	4490931	4497354	4496413	-1	SRY (sex determining region Y)-box 17 [Source:MGI Symbol;Acc:MGI:107543]
ENSMUSG00000036273.15	3642.3	-0.275654	0.0985958	-2.79579	0.00517723	0.241893	ENSMUSG00000036273.15	ENSMUSG00000036273	Lrrk2	15	91673175	91816120	91673175	1	leucine-rich repeat kinase 2 [Source:MGI Symbol;Acc:MGI:1913975]
ENSMUSG00000073411.12	10474.1	-0.16146	0.0578238	-2.79228	0.00523385	0.243911	ENSMUSG00000073411.12	ENSMUSG00000073411	H2-D1	17	35262730	35267499	35262730	1	histocompatibility 2, D region locus 1 [Source:MGI Symbol;Acc:MGI:95896]
ENSMUSG00000032420.8	3092.92	0.170376	0.0610553	2.79051	0.00526245	0.24437	ENSMUSG00000032420.8	ENSMUSG00000032420	Nt5e	9	88327197	88372092	88327197	1	5' nucleotidase, ecto [Source:MGI Symbol;Acc:MGI:99782]
ENSMUSG00000030213.12	2662.58	0.193168	0.0692356	2.79001	0.00527058	0.24437	ENSMUSG00000030213.12	ENSMUSG00000030213	Atf7ip	6	136506167	136610862	136506167	1	activating transcription factor 7 interacting protein [Source:MGI Symbol;Acc:MGI:1858965]
ENSMUSG00000039994.15	1383.23	-0.345243	0.123805	-2.7886	0.00529368	0.244516	ENSMUSG00000039994.15	ENSMUSG00000039994	Timeless	10	128232065	128252941	128232065	1	timeless circadian clock 1 [Source:MGI Symbol;Acc:MGI:1321393]
ENSMUSG00000032220.10	10057.6	0.135907	0.048744	2.78817	0.00530066	0.244516	ENSMUSG00000032220.10	ENSMUSG00000032220	Myo1e	9	70207350	70399766	70207350	1	myosin IE [Source:MGI Symbol;Acc:MGI:106621]
ENSMUSG00000024805.16	364.38	-0.413134	0.148246	-2.78681	0.00532305	0.244928	ENSMUSG00000024805.16	ENSMUSG00000024805	Pcgf5	19	36348309	36460970	36348309	1	polycomb group ring finger 5 [Source:MGI Symbol;Acc:MGI:1923505]
ENSMUSG00000034551.12	241.459	0.480553	0.172501	2.7858	0.00533954	0.245066	ENSMUSG00000034551.12	ENSMUSG00000034551	Hdx	X	111569931	111697079	111697079	-1	highly divergent homeobox [Source:MGI Symbol;Acc:MGI:2685226]
ENSMUSG00000042099.16	524.31	-0.397677	0.14282	-2.78447	0.00536152	0.245391	ENSMUSG00000042099.16	ENSMUSG00000042099	Kank3	17	33810519	33822918	33810519	1	KN motif and ankyrin repeat domains 3 [Source:MGI Symbol;Acc:MGI:1098615]
ENSMUSG00000024210.3	41.0039	-1.31737	0.473239	-2.78374	0.00537362	0.245391	ENSMUSG00000024210.3	ENSMUSG00000024210	Ip6k3	17	27143965	27167795	27167795	-1	inositol hexaphosphate kinase 3 [Source:MGI Symbol;Acc:MGI:3045325]
ENSMUSG00000021903.11	259.041	-0.469175	0.169121	-2.7742	0.00553381	0.252073	ENSMUSG00000021903.11	ENSMUSG00000021903	Galnt15	14	32028989	32062197	32028989	1	polypeptide N-acetylgalactosaminyltransferase 15 [Source:MGI Symbol;Acc:MGI:1926004]
ENSMUSG00000033377.14	3576.7	0.146899	0.0529786	2.77279	0.00555775	0.252365	ENSMUSG00000033377.14	ENSMUSG00000033377	Palmd	3	116918258	116968987	116968987	-1	palmdelphin [Source:MGI Symbol;Acc:MGI:2148896]
ENSMUSG00000032698.15	385.759	-0.424325	0.153065	-2.77219	0.00556799	0.252365	ENSMUSG00000032698.15	ENSMUSG00000032698	Lmo2	2	103957986	103981878	103970129	1	LIM domain only 2 [Source:MGI Symbol;Acc:MGI:102811]
ENSMUSG00000118193.1	2.92516	4.95605	1.78827	2.77141	0.00558133	NA	ENSMUSG00000118193.1	ENSMUSG00000118193	Arhgap26	18	38676718	39110534	38676718	1	Rho GTPase activating protein 26 [Source:MGI Symbol;Acc:MGI:1918552]
ENSMUSG00000030126.17	2226	0.171896	0.0621771	2.76461	0.0056991	0.257562	ENSMUSG00000030126.17	ENSMUSG00000030126	Tmcc1	6	116018611	116193486	116193486	-1	transmembrane and coiled coil domains 1 [Source:MGI Symbol;Acc:MGI:2442368]
ENSMUSG00000031799.10	3928.96	-0.147758	0.0534595	-2.76393	0.00571101	0.257562	ENSMUSG00000031799.10	ENSMUSG00000031799	Tpm4	8	72130174	72153142	72130174	1	tropomyosin 4 [Source:MGI Symbol;Acc:MGI:2449202]
ENSMUSG00000034570.12	3307.75	0.152361	0.055172	2.76157	0.00575247	0.258788	ENSMUSG00000034570.12	ENSMUSG00000034570	Inpp5j	11	3494375	3504821	3504821	-1	inositol polyphosphate 5-phosphatase J [Source:MGI Symbol;Acc:MGI:2158663]
ENSMUSG00000045410.18	968.409	0.367525	0.133124	2.76076	0.00576666	0.258788	ENSMUSG00000045410.18	ENSMUSG00000045410	Akr1e1	13	4590750	4609174	4609174	-1	aldo-keto reductase family 1, member E1 [Source:MGI Symbol;Acc:MGI:1914758]
ENSMUSG00000019943.10	14542.4	0.118877	0.0430929	2.75863	0.00580438	0.259533	ENSMUSG00000019943.10	ENSMUSG00000019943	Atp2b1	10	98914406	99026143	98914406	1	ATPase, Ca++ transporting, plasma membrane 1 [Source:MGI Symbol;Acc:MGI:104653]
ENSMUSG00000057337.13	560.996	0.336805	0.12211	2.75821	0.00581182	0.259533	ENSMUSG00000057337.13	ENSMUSG00000057337	Chst3	10	60181532	60219260	60188707	-1	carbohydrate sulfotransferase 3 [Source:MGI Symbol;Acc:MGI:1858224]
ENSMUSG00000046598.15	1395.09	0.238977	0.0866952	2.75652	0.00584208	0.259633	ENSMUSG00000046598.15	ENSMUSG00000046598	Bdh1	16	31422280	31458901	31422280	1	3-hydroxybutyrate dehydrogenase, type 1 [Source:MGI Symbol;Acc:MGI:1919161]
ENSMUSG00000019055.15	1623.63	-0.189011	0.0686006	-2.75524	0.00586491	0.259633	ENSMUSG00000019055.15	ENSMUSG00000019055	Plod1	4	147909753	147936767	147936767	-1	procollagen-lysine, 2-oxoglutarate 5-dioxygenase 1 [Source:MGI Symbol;Acc:MGI:99907]
ENSMUSG00000050708.16	22198.1	-0.124893	0.0453331	-2.75501	0.00586895	0.259633	ENSMUSG00000050708.16	ENSMUSG00000050708	Ftl1	7	45457944	45459884	45459884	-1	ferritin light polypeptide 1 [Source:MGI Symbol;Acc:MGI:95589]
ENSMUSG00000007097.14	15303.9	-0.16999	0.0617048	-2.75489	0.0058712	0.259633	ENSMUSG00000007097.14	ENSMUSG00000007097	Atp1a2	1	172271709	172298064	172298064	-1	ATPase, Na+/K+ transporting, alpha 2 polypeptide [Source:MGI Symbol;Acc:MGI:88106]
ENSMUSG00000036278.7	674.894	-0.307316	0.111624	-2.75313	0.00590281	0.260397	ENSMUSG00000036278.7	ENSMUSG00000036278	Macrod1	19	7056810	7198057	7056810	1	mono-ADP ribosylhydrolase 1 [Source:MGI Symbol;Acc:MGI:2147583]
ENSMUSG00000036606.17	2082.35	-0.208748	0.0760549	-2.7447	0.00605661	0.26606	ENSMUSG00000036606.17	ENSMUSG00000036606	Plxnb2	15	89155549	89180788	89156572	-1	plexin B2 [Source:MGI Symbol;Acc:MGI:2154239]
ENSMUSG00000051029.8	655.638	0.278929	0.101632	2.74449	0.00606045	0.26606	ENSMUSG00000051029.8	ENSMUSG00000051029	Serpinb1b	13	33078575	33094380	33078575	1	serine (or cysteine) peptidase inhibitor, clade B, member 1b [Source:MGI Symbol;Acc:MGI:2445361]
ENSMUSG00000100755.1	2984.94	-0.177763	0.0647998	-2.74326	0.00608321	0.266415	ENSMUSG00000100755.1	ENSMUSG00000100755	Rps23-ps1	3	37714740	37715164	37714740	1	ribosomal protein S23, pseudogene 1 [Source:MGI Symbol;Acc:MGI:3705429]
ENSMUSG00000022185.19	4117.03	-0.156338	0.0570562	-2.74006	0.0061427	0.267799	ENSMUSG00000022185.19	ENSMUSG00000022185	Acin1	14	54642161	54686931	54653616	-1	apoptotic chromatin condensation inducer 1 [Source:MGI Symbol;Acc:MGI:1891824]
ENSMUSG00000035437.15	4706.32	0.123042	0.0449061	2.73998	0.00614427	0.267799	ENSMUSG00000035437.15	ENSMUSG00000035437	Rabgap1	2	37443279	37566454	37443279	1	RAB GTPase activating protein 1 [Source:MGI Symbol;Acc:MGI:2385139]
ENSMUSG00000076613.4	8.58716	3.57306	1.3045	2.73903	0.00616199	0.267929	ENSMUSG00000076613.4	ENSMUSG00000076613	Ighg2b	12	113302965	113307933	113307933	-1	immunoglobulin heavy constant gamma 2B [Source:MGI Symbol;Acc:MGI:96445]
ENSMUSG00000037887.11	3057.54	0.147249	0.0537762	2.73818	0.00617795	0.267982	ENSMUSG00000037887.11	ENSMUSG00000037887	Dusp8	7	142079490	142095843	142095272	-1	dual specificity phosphatase 8 [Source:MGI Symbol;Acc:MGI:106626]
ENSMUSG00000029306.8	327.744	0.382919	0.140068	2.73381	0.0062607	0.270924	ENSMUSG00000029306.8	ENSMUSG00000029306	Ibsp	5	104299171	104311469	104299171	1	integrin binding sialoprotein [Source:MGI Symbol;Acc:MGI:96389]
ENSMUSG00000038187.14	2292.2	0.169436	0.0620004	2.73282	0.0062794	0.271088	ENSMUSG00000038187.14	ENSMUSG00000038187	Btbd10	7	113315626	113369392	113347285	-1	BTB (POZ) domain containing 10 [Source:MGI Symbol;Acc:MGI:1916065]
ENSMUSG00000031312.5	35.8405	-2.13068	0.779971	-2.73175	0.00629991	0.271105	ENSMUSG00000031312.5	ENSMUSG00000031312	Itgb1bp2	X	101449088	101453541	101449088	1	integrin beta 1 binding protein 2 [Source:MGI Symbol;Acc:MGI:1353420]
ENSMUSG00000072969.2	852.054	0.236689	0.0866743	2.73079	0.00631829	0.271105	ENSMUSG00000072969.2	ENSMUSG00000072969	Armcx5	X	135742733	135747322	135742733	1	armadillo repeat containing, X-linked 5 [Source:MGI Symbol;Acc:MGI:2148026]
ENSMUSG00000079450.11	385.04	0.452672	0.165786	2.73046	0.00632453	0.271105	ENSMUSG00000079450.11	ENSMUSG00000079450	Cldn34c1	X	123103495	123188795	123103495	1	claudin 34C1 [Source:MGI Symbol;Acc:MGI:1920311]
ENSMUSG00000021676.10	793.664	-0.383493	0.140633	-2.72691	0.00639303	0.273396	ENSMUSG00000021676.10	ENSMUSG00000021676	Iqgap2	13	95627174	95892483	95891995	-1	IQ motif containing GTPase activating protein 2 [Source:MGI Symbol;Acc:MGI:2449975]
ENSMUSG00000026616.16	39.8874	2.02606	0.743402	2.72538	0.0064227	0.27402	ENSMUSG00000026616.16	ENSMUSG00000026616	Cr2	1	195136811	195176716	195176716	-1	complement receptor 2 [Source:MGI Symbol;Acc:MGI:88489]
ENSMUSG00000043924.16	2683.21	-0.1878	0.0689395	-2.72413	0.00644707	0.274416	ENSMUSG00000043924.16	ENSMUSG00000043924	Ncmap	4	135369576	135398227	135385655	-1	noncompact myelin associated protein [Source:MGI Symbol;Acc:MGI:2444888]
ENSMUSG00000040428.19	6031.05	-0.237986	0.0874917	-2.72009	0.00652633	0.276278	ENSMUSG00000040428.19	ENSMUSG00000040428	Plekha4	7	45526330	45554229	45526330	1	pleckstrin homology domain containing, family A (phosphoinositide binding specific) member 4 [Source:MGI Symbol;Acc:MGI:1916467]
ENSMUSG00000034525.7	3940.58	0.158415	0.0582439	2.71985	0.00653111	0.276278	ENSMUSG00000034525.7	ENSMUSG00000034525	Ice1	13	70551707	70637634	70573193	-1	interactor of little elongation complex ELL subunit 1 [Source:MGI Symbol;Acc:MGI:2385865]
ENSMUSG00000074001.3	55.6828	-1.16758	0.429324	-2.71958	0.00653642	0.276278	ENSMUSG00000074001.3	ENSMUSG00000074001	Klhl40	9	121777607	121783818	121777607	1	kelch-like 40 [Source:MGI Symbol;Acc:MGI:1919580]
ENSMUSG00000001911.16	1164.47	-0.283147	0.104244	-2.71619	0.00660387	0.278481	ENSMUSG00000001911.16	ENSMUSG00000001911	Nfix	8	84699876	84800344	84708218	-1	nuclear factor I/X [Source:MGI Symbol;Acc:MGI:97311]
ENSMUSG00000021500.17	2766.29	0.165003	0.0608406	2.71205	0.00668684	0.281013	ENSMUSG00000021500.17	ENSMUSG00000021500	Ddx46	13	55635027	55681256	55635028	1	DEAD (Asp-Glu-Ala-Asp) box polypeptide 46 [Source:MGI Symbol;Acc:MGI:1920895]
ENSMUSG00000027470.9	194.29	-2.92512	1.07872	-2.71165	0.00669483	0.281013	ENSMUSG00000027470.9	ENSMUSG00000027470	Mylk2	2	152911352	152923068	152911352	1	myosin, light polypeptide kinase 2, skeletal muscle [Source:MGI Symbol;Acc:MGI:2139434]
ENSMUSG00000029622.16	13907.7	-0.17441	0.0643727	-2.70939	0.00674076	0.282289	ENSMUSG00000029622.16	ENSMUSG00000029622	Arpc1b	5	145114215	145130705	145114215	1	actin related protein 2/3 complex, subunit 1B [Source:MGI Symbol;Acc:MGI:1343142]
ENSMUSG00000029657.15	15347.8	-0.178154	0.065815	-2.70689	0.00679176	0.283771	ENSMUSG00000029657.15	ENSMUSG00000029657	Hsph1	5	149614287	149636376	149636171	-1	heat shock 105kDa/110kDa protein 1 [Source:MGI Symbol;Acc:MGI:105053]
ENSMUSG00000055214.15	2593.76	0.226687	0.0838285	2.70417	0.00684749	0.285241	ENSMUSG00000055214.15	ENSMUSG00000055214	Pld5	1	175962306	176275312	176275312	-1	phospholipase D family, member 5 [Source:MGI Symbol;Acc:MGI:2442056]
ENSMUSG00000094002.3	462.175	0.4488	0.166176	2.70075	0.00691826	0.285241	ENSMUSG00000094002.3	ENSMUSG00000094002	Gm9866	12	27050950	27160633	27160503	-1	predicted gene 9866 [Source:MGI Symbol;Acc:MGI:3643118]
ENSMUSG00000031298.15	2715.24	0.207107	0.0766893	2.7006	0.00692155	0.285241	ENSMUSG00000031298.15	ENSMUSG00000031298	Adgrg2	X	160390690	160498070	160390725	1	adhesion G protein-coupled receptor G2 [Source:MGI Symbol;Acc:MGI:2446854]
ENSMUSG00000019874.11	6793.86	-0.196176	0.0726502	-2.70028	0.00692805	0.285241	ENSMUSG00000019874.11	ENSMUSG00000019874	Fabp7	10	57784881	57788450	57784881	1	fatty acid binding protein 7, brain [Source:MGI Symbol;Acc:MGI:101916]
ENSMUSG00000026678.10	7548.73	-0.141494	0.0524017	-2.70017	0.0069304	0.285241	ENSMUSG00000026678.10	ENSMUSG00000026678	Rgs5	1	169655501	169695813	169655501	1	regulator of G-protein signaling 5 [Source:MGI Symbol;Acc:MGI:1098434]
ENSMUSG00000054302.15	1923.53	0.179002	0.0663319	2.69858	0.00696354	0.285241	ENSMUSG00000054302.15	ENSMUSG00000054302	Eapp	12	54670340	54695897	54695881	-1	E2F-associated phosphoprotein [Source:MGI Symbol;Acc:MGI:1913516]
ENSMUSG00000036553.16	65.134	-0.834401	0.309234	-2.69828	0.00696991	0.285241	ENSMUSG00000036553.16	ENSMUSG00000036553	Sh3tc1	5	35697180	35739987	35721603	-1	SH3 domain and tetratricopeptide repeats 1 [Source:MGI Symbol;Acc:MGI:2678949]
ENSMUSG00000030103.11	1257.43	0.281331	0.104281	2.69782	0.00697961	0.285241	ENSMUSG00000030103.11	ENSMUSG00000030103	Bhlhe40	6	108660629	108666925	108660629	1	basic helix-loop-helix family, member e40 [Source:MGI Symbol;Acc:MGI:1097714]
ENSMUSG00000021815.4	32.4857	-1.81078	0.67133	-2.6973	0.00699051	0.285241	ENSMUSG00000021815.4	ENSMUSG00000021815	Mss51	14	20482867	20496901	20496901	-1	MSS51 mitochondrial translational activator [Source:MGI Symbol;Acc:MGI:1922093]
ENSMUSG00000000766.18	631.347	-0.302372	0.11211	-2.6971	0.00699462	0.285241	ENSMUSG00000000766.18	ENSMUSG00000000766	Oprm1	10	6758506	7038198	6788809	1	opioid receptor, mu 1 [Source:MGI Symbol;Acc:MGI:97441]
ENSMUSG00000025986.6	2908.63	-0.198025	0.0734463	-2.69618	0.00701392	0.285241	ENSMUSG00000025986.6	ENSMUSG00000025986	Slc39a10	1	46807544	46892852	46854046	-1	solute carrier family 39 (zinc transporter), member 10 [Source:MGI Symbol;Acc:MGI:1914515]
ENSMUSG00000005628.12	80.515	-2.88519	1.07013	-2.69612	0.00701527	0.285241	ENSMUSG00000005628.12	ENSMUSG00000005628	Tmod4	3	95124476	95129209	95124476	1	tropomodulin 4 [Source:MGI Symbol;Acc:MGI:1355285]
ENSMUSG00000055963.12	1271.65	0.226226	0.0839621	2.69438	0.00705197	0.286093	ENSMUSG00000055963.12	ENSMUSG00000055963	Triqk	4	12906838	12983553	12906838	1	triple QxxK/R motif containing [Source:MGI Symbol;Acc:MGI:3650048]
ENSMUSG00000009406.13	665.905	-0.250455	0.0930982	-2.69022	0.0071404	0.289035	ENSMUSG00000009406.13	ENSMUSG00000009406	Elk1	X	20933395	20950608	20950608	-1	ELK1, member of ETS oncogene family [Source:MGI Symbol;Acc:MGI:101833]
ENSMUSG00000064351.1	264377	-0.461513	0.171871	-2.68524	0.00724788	0.292516	ENSMUSG00000064351.1	ENSMUSG00000064351	mt-Co1	MT	5328	6872	5328	1	mitochondrially encoded cytochrome c oxidase I [Source:MGI Symbol;Acc:MGI:102504]
ENSMUSG00000030203.17	798.834	-0.247986	0.0923687	-2.68474	0.00725859	0.292516	ENSMUSG00000030203.17	ENSMUSG00000030203	Dusp16	6	134715468	134792625	134792475	-1	dual specificity phosphatase 16 [Source:MGI Symbol;Acc:MGI:1917936]
ENSMUSG00000091204.8	1620.56	-0.215798	0.0804232	-2.68328	0.00729042	0.29253	ENSMUSG00000091204.8	ENSMUSG00000091204	Gm7271	5	76484040	76516649	76484040	1	predicted gene 7271 [Source:MGI Symbol;Acc:MGI:3647743]
ENSMUSG00000024747.3	307.692	0.516801	0.192603	2.68325	0.00729111	0.29253	ENSMUSG00000024747.3	ENSMUSG00000024747	Aldh1a7	19	20692953	20727562	20727562	-1	aldehyde dehydrogenase family 1, subfamily A7 [Source:MGI Symbol;Acc:MGI:1347050]
ENSMUSG00000031503.13	5080.78	-0.17784	0.0663009	-2.68232	0.00731138	0.292697	ENSMUSG00000031503.13	ENSMUSG00000031503	Col4a2	8	11312805	11449287	11312805	1	collagen, type IV, alpha 2 [Source:MGI Symbol;Acc:MGI:88455]
ENSMUSG00000027834.15	7470.51	0.139384	0.0520304	2.6789	0.0073864	0.294466	ENSMUSG00000027834.15	ENSMUSG00000027834	Serpini1	3	75557547	75643495	75557547	1	serine (or cysteine) peptidase inhibitor, clade I, member 1 [Source:MGI Symbol;Acc:MGI:1194506]
ENSMUSG00000037321.17	404.346	-0.427075	0.159426	-2.67883	0.00738798	0.294466	ENSMUSG00000037321.17	ENSMUSG00000037321	Tap1	17	34187553	34197225	34187553	1	transporter 1, ATP-binding cassette, sub-family B (MDR/TAP) [Source:MGI Symbol;Acc:MGI:98483]
ENSMUSG00000074449.3	3.71313	5.29633	1.978	2.67761	0.00741485	NA	ENSMUSG00000074449.3	ENSMUSG00000074449	Gm15319	8	20337664	20363210	20363210	-1	predicted gene 15319 [Source:MGI Symbol;Acc:MGI:3796981]
ENSMUSG00000003617.16	2623.76	-0.176864	0.0660617	-2.67726	0.00742265	0.295201	ENSMUSG00000003617.16	ENSMUSG00000003617	Cp	3	19957054	20009145	19957054	1	ceruloplasmin [Source:MGI Symbol;Acc:MGI:88476]
ENSMUSG00000037720.16	5177.88	-0.148659	0.0556178	-2.67287	0.00752051	0.29844	ENSMUSG00000037720.16	ENSMUSG00000037720	Tmem33	5	67260565	67291461	67260565	1	transmembrane protein 33 [Source:MGI Symbol;Acc:MGI:1915128]
ENSMUSG00000061731.9	1385.83	-0.217349	0.0813764	-2.67091	0.00756466	0.299006	ENSMUSG00000061731.9	ENSMUSG00000061731	Ext1	15	53064038	53346159	53346159	-1	exostosin glycosyltransferase 1 [Source:MGI Symbol;Acc:MGI:894663]
ENSMUSG00000102059.1	20.8668	2.0694	0.774831	2.67077	0.00756768	0.299006	ENSMUSG00000102059.1	ENSMUSG00000102059	Gm20257	1	58652641	58655831	58652641	1	predicted gene, 20257 [Source:MGI Symbol;Acc:MGI:5012442]
ENSMUSG00000031382.14	25.1612	-2.25425	0.844903	-2.66806	0.00762902	0.300775	ENSMUSG00000031382.14	ENSMUSG00000031382	Asb11	X	164436994	164459170	164436994	1	ankyrin repeat and SOCS box-containing 11 [Source:MGI Symbol;Acc:MGI:1916104]
ENSMUSG00000019737.14	277.047	-0.528879	0.198616	-2.66283	0.00774875	0.304834	ENSMUSG00000019737.14	ENSMUSG00000019737	Syne4	7	30314807	30319046	30314807	1	spectrin repeat containing, nuclear envelope family member 4 [Source:MGI Symbol;Acc:MGI:2141950]
ENSMUSG00000071054.12	3390.11	0.15821	0.059499	2.65904	0.00783639	0.307617	ENSMUSG00000071054.12	ENSMUSG00000071054	Safb	17	56584825	56606294	56584825	1	scaffold attachment factor B [Source:MGI Symbol;Acc:MGI:2146974]
ENSMUSG00000009090.17	10677.1	0.163411	0.0614981	2.65717	0.00788003	0.308663	ENSMUSG00000009090.17	ENSMUSG00000009090	Ap1b1	11	4986824	5042791	4986824	1	adaptor protein complex AP-1, beta 1 subunit [Source:MGI Symbol;Acc:MGI:1096368]
ENSMUSG00000026864.13	14043.6	-0.0995572	0.0375589	-2.6507	0.00803259	0.313962	ENSMUSG00000026864.13	ENSMUSG00000026864	Hspa5	2	34771970	34777547	34771970	1	heat shock protein 5 [Source:MGI Symbol;Acc:MGI:95835]
ENSMUSG00000060636.14	3008.02	-0.183191	0.0691446	-2.64939	0.0080637	0.314228	ENSMUSG00000060636.14	ENSMUSG00000060636	Rpl35a	16	33056453	33060189	33056453	1	ribosomal protein L35A [Source:MGI Symbol;Acc:MGI:1928894]
ENSMUSG00000026365.15	1659.45	-0.226968	0.0856819	-2.64896	0.00807398	0.314228	ENSMUSG00000026365.15	ENSMUSG00000026365	Cfh	1	140084708	140183764	140183280	-1	complement component factor h [Source:MGI Symbol;Acc:MGI:88385]
ENSMUSG00000033931.9	1059	0.212625	0.0802917	2.64816	0.00809315	0.314301	ENSMUSG00000033931.9	ENSMUSG00000033931	Rbm34	8	126947172	126971071	126971071	-1	RNA binding motif protein 34 [Source:MGI Symbol;Acc:MGI:1098653]
ENSMUSG00000025887.10	534.665	-0.294335	0.111242	-2.6459	0.00814743	0.315149	ENSMUSG00000025887.10	ENSMUSG00000025887	Casp12	9	5345430	5373032	5345430	1	caspase 12 [Source:MGI Symbol;Acc:MGI:1312922]
ENSMUSG00000031486.15	1277.78	-0.227542	0.0860319	-2.64485	0.0081726	0.315149	ENSMUSG00000031486.15	ENSMUSG00000031486	Adgra2	8	27085583	27123436	27085583	1	adhesion G protein-coupled receptor A2 [Source:MGI Symbol;Acc:MGI:1925810]
ENSMUSG00000061080.11	7904.21	0.198876	0.0752087	2.64432	0.0081855	0.315149	ENSMUSG00000061080.11	ENSMUSG00000061080	Lsamp	16	39984361	42181679	39984361	1	limbic system-associated membrane protein [Source:MGI Symbol;Acc:MGI:1261760]
ENSMUSG00000001435.15	1581.71	-0.299962	0.113452	-2.64396	0.00819422	0.315149	ENSMUSG00000001435.15	ENSMUSG00000001435	Col18a1	10	77052178	77166548	77166548	-1	collagen, type XVIII, alpha 1 [Source:MGI Symbol;Acc:MGI:88451]
ENSMUSG00000020838.12	18.7918	-1.63424	0.618174	-2.64365	0.00820168	0.315149	ENSMUSG00000020838.12	ENSMUSG00000020838	Slc6a4	11	76998603	77032340	76998603	1	solute carrier family 6 (neurotransmitter transporter, serotonin), member 4 [Source:MGI Symbol;Acc:MGI:96285]
ENSMUSG00000062210.13	182.567	-0.527151	0.199547	-2.64174	0.00824816	0.315359	ENSMUSG00000062210.13	ENSMUSG00000062210	Tnfaip8	18	49979427	50107173	49979427	1	tumor necrosis factor, alpha-induced protein 8 [Source:MGI Symbol;Acc:MGI:2147191]
ENSMUSG00000025077.13	339.391	-0.342445	0.129634	-2.64163	0.00825083	0.315359	ENSMUSG00000025077.13	ENSMUSG00000025077	Dclre1a	19	56529167	56548222	56548147	-1	DNA cross-link repair 1A [Source:MGI Symbol;Acc:MGI:1930042]
ENSMUSG00000025790.14	2702.88	-0.15221	0.0576274	-2.64129	0.0082592	0.315359	ENSMUSG00000025790.14	ENSMUSG00000025790	Slco3a1	7	74275419	74554780	74554633	-1	solute carrier organic anion transporter family, member 3a1 [Source:MGI Symbol;Acc:MGI:1351867]
ENSMUSG00000041237.12	5.5467	4.19177	1.58818	2.63936	0.0083063	NA	ENSMUSG00000041237.12	ENSMUSG00000041237	Pklr	3	89136142	89146784	89136142	1	pyruvate kinase liver and red blood cell [Source:MGI Symbol;Acc:MGI:97604]
ENSMUSG00000027803.14	1106.98	-0.261748	0.0993086	-2.6357	0.00839634	0.318302	ENSMUSG00000027803.14	ENSMUSG00000027803	Wwtr1	3	57455649	57575910	57575828	-1	WW domain containing transcription regulator 1 [Source:MGI Symbol;Acc:MGI:1917649]
ENSMUSG00000039001.12	2912.98	-0.193532	0.0734456	-2.63504	0.00841274	0.318302	ENSMUSG00000039001.12	ENSMUSG00000039001	Rps21	2	180257377	180258445	180257377	1	ribosomal protein S21 [Source:MGI Symbol;Acc:MGI:1913731]
ENSMUSG00000024471.12	223.33	-3.03155	1.15077	-2.63437	0.00842927	0.318302	ENSMUSG00000024471.12	ENSMUSG00000024471	Myot	18	44334074	44355724	44334074	1	myotilin [Source:MGI Symbol;Acc:MGI:1889800]
ENSMUSG00000028977.17	4697.39	0.171709	0.0651874	2.63408	0.00843652	0.318302	ENSMUSG00000028977.17	ENSMUSG00000028977	Casz1	4	148804429	148954889	148804429	1	castor zinc finger 1 [Source:MGI Symbol;Acc:MGI:1196251]
ENSMUSG00000025133.9	2018.28	0.24408	0.0926801	2.63357	0.00844926	0.318302	ENSMUSG00000025133.9	ENSMUSG00000025133	Ints4	7	97480956	97541395	97480956	1	integrator complex subunit 4 [Source:MGI Symbol;Acc:MGI:1917164]
ENSMUSG00000090223.2	8150.31	0.147442	0.0559878	2.63347	0.00845162	0.318302	ENSMUSG00000090223.2	ENSMUSG00000090223	Pcp4	16	96467606	96525793	96467606	1	Purkinje cell protein 4 [Source:MGI Symbol;Acc:MGI:97509]
ENSMUSG00000048782.15	598.614	0.30057	0.114147	2.63318	0.00845886	0.318302	ENSMUSG00000048782.15	ENSMUSG00000048782	Insc	7	114743694	114850383	114743694	1	INSC spindle orientation adaptor protein [Source:MGI Symbol;Acc:MGI:1917942]
ENSMUSG00000036578.7	11642.6	0.113862	0.0432755	2.63109	0.00851113	0.319199	ENSMUSG00000036578.7	ENSMUSG00000036578	Fxyd7	7	31042513	31051467	31051403	-1	FXYD domain-containing ion transport regulator 7 [Source:MGI Symbol;Acc:MGI:1889006]
ENSMUSG00000019278.5	204.465	-0.545244	0.207252	-2.63082	0.00851783	0.319199	ENSMUSG00000019278.5	ENSMUSG00000019278	Dpep1	8	123186242	123201812	123186242	1	dipeptidase 1 [Source:MGI Symbol;Acc:MGI:94917]
ENSMUSG00000097565.1	3.56982	5.24843	1.99561	2.62999	0.00853862	NA	ENSMUSG00000097565.1	ENSMUSG00000097565	Gm26965	13	67491152	67526151	67526151	-1	predicted gene, 26965 [Source:MGI Symbol;Acc:MGI:5504080]
ENSMUSG00000034189.5	6059.75	0.127097	0.0483307	2.62973	0.00854533	0.319571	ENSMUSG00000034189.5	ENSMUSG00000034189	Hsdl1	8	119561989	119575183	119575183	-1	hydroxysteroid dehydrogenase like 1 [Source:MGI Symbol;Acc:MGI:1919802]
ENSMUSG00000034579.17	1185.95	-0.222764	0.0848171	-2.6264	0.00862926	0.321856	ENSMUSG00000034579.17	ENSMUSG00000034579	Pla2g3	11	3488284	3499350	3488284	1	phospholipase A2, group III [Source:MGI Symbol;Acc:MGI:2444945]
ENSMUSG00000097767.8	9930.35	-0.195582	0.0744817	-2.62591	0.00864185	0.321856	ENSMUSG00000097767.8	ENSMUSG00000097767	Miat	5	112213228	112229395	112229395	-1	myocardial infarction associated transcript (non-protein coding) [Source:MGI Symbol;Acc:MGI:2444886]
ENSMUSG00000095538.1	3.62278	5.27204	2.01004	2.62286	0.00871947	NA	ENSMUSG00000095538.1	ENSMUSG00000095538	Gm21983	7	27168430	27181086	27181086	-1	predicted gene 21983 [Source:MGI Symbol;Acc:MGI:5439452]
ENSMUSG00000030223.14	658.495	-0.273785	0.104409	-2.62223	0.00873557	0.324681	ENSMUSG00000030223.14	ENSMUSG00000030223	Ptpro	6	137252319	137463233	137252319	1	protein tyrosine phosphatase, receptor type, O [Source:MGI Symbol;Acc:MGI:1097152]
ENSMUSG00000027201.16	3972.5	0.13566	0.0517906	2.61939	0.00880883	0.326736	ENSMUSG00000027201.16	ENSMUSG00000027201	Myef2	2	125084628	125123661	125089011	-1	myelin basic protein expression factor 2, repressor [Source:MGI Symbol;Acc:MGI:104592]
ENSMUSG00000054013.6	5045.05	0.143245	0.0547173	2.6179	0.00884723	0.327141	ENSMUSG00000054013.6	ENSMUSG00000054013	Tmem179	12	112500189	112516747	112511172	-1	transmembrane protein 179 [Source:MGI Symbol;Acc:MGI:2144891]
ENSMUSG00000037610.15	247.068	0.429222	0.163977	2.61757	0.00885576	0.327141	ENSMUSG00000037610.15	ENSMUSG00000037610	Kcnmb2	3	31902507	32200180	31902507	1	potassium large conductance calcium-activated channel, subfamily M, beta member 2 [Source:MGI Symbol;Acc:MGI:1919663]
ENSMUSG00000032518.6	11359.2	-0.133347	0.0509913	-2.6151	0.00892007	0.328322	ENSMUSG00000032518.6	ENSMUSG00000032518	Rpsa	9	120127689	120132369	120127689	1	ribosomal protein SA [Source:MGI Symbol;Acc:MGI:105381]
ENSMUSG00000004267.16	38256.9	0.146955	0.0561978	2.61496	0.00892386	0.328322	ENSMUSG00000004267.16	ENSMUSG00000004267	Eno2	6	124760053	124769673	124763612	-1	enolase 2, gamma neuronal [Source:MGI Symbol;Acc:MGI:95394]
ENSMUSG00000028364.15	133.759	-0.618754	0.236691	-2.61419	0.00894398	0.328398	ENSMUSG00000028364.15	ENSMUSG00000028364	Tnc	4	63959785	64047015	64020725	-1	tenascin C [Source:MGI Symbol;Acc:MGI:101922]
ENSMUSG00000028199.18	403.555	0.350631	0.134171	2.61332	0.00896669	0.328568	ENSMUSG00000028199.18	ENSMUSG00000028199	Cryz	3	154596711	154623182	154596711	1	crystallin, zeta [Source:MGI Symbol;Acc:MGI:88527]
ENSMUSG00000025872.5	1593.54	0.187035	0.0716201	2.61148	0.00901505	0.328988	ENSMUSG00000025872.5	ENSMUSG00000025872	Thoc3	13	54458837	54468849	54468849	-1	THO complex 3 [Source:MGI Symbol;Acc:MGI:1920916]
ENSMUSG00000024687.11	4441.11	0.121733	0.0466242	2.61095	0.00902907	0.328988	ENSMUSG00000024687.11	ENSMUSG00000024687	Osbp	19	11965941	11994112	11965941	1	oxysterol binding protein [Source:MGI Symbol;Acc:MGI:97447]
ENSMUSG00000034845.6	573.159	-0.393125	0.150578	-2.61078	0.00903352	0.328988	ENSMUSG00000034845.6	ENSMUSG00000034845	Plvap	8	71497765	71511752	71511752	-1	plasmalemma vesicle associated protein [Source:MGI Symbol;Acc:MGI:1890497]
ENSMUSG00000046201.9	2389.44	0.163057	0.0624885	2.60939	0.0090705	0.328988	ENSMUSG00000046201.9	ENSMUSG00000046201	Scaf8	17	3114972	3198859	3114972	1	SR-related CTD-associated factor 8 [Source:MGI Symbol;Acc:MGI:1925212]
ENSMUSG00000063052.9	883.09	0.242291	0.0928682	2.60897	0.0090814	0.328988	ENSMUSG00000063052.9	ENSMUSG00000063052	Lrrc40	3	158036662	158068487	158036662	1	leucine rich repeat containing 40 [Source:MGI Symbol;Acc:MGI:1914394]
ENSMUSG00000030093.7	310.729	0.354532	0.1359	2.60877	0.00908677	0.328988	ENSMUSG00000030093.7	ENSMUSG00000030093	Wnt7a	6	91363981	91411363	91411363	-1	wingless-type MMTV integration site family, member 7A [Source:MGI Symbol;Acc:MGI:98961]
ENSMUSG00000044938.8	55.5485	-2.91695	1.11907	-2.60657	0.00914532	0.33045	ENSMUSG00000044938.8	ENSMUSG00000044938	Klhl31	9	77636500	77660127	77636500	1	kelch-like 31 [Source:MGI Symbol;Acc:MGI:3045305]
ENSMUSG00000058656.13	2959.66	-0.176939	0.0679102	-2.60549	0.00917441	0.330843	ENSMUSG00000058656.13	ENSMUSG00000058656	Samd12	15	53453810	53902537	53902530	-1	sterile alpha motif domain containing 12 [Source:MGI Symbol;Acc:MGI:2444518]
ENSMUSG00000028495.14	9138.19	-0.150532	0.0577975	-2.60448	0.00920133	0.331157	ENSMUSG00000028495.14	ENSMUSG00000028495	Rps6	4	86854660	86857412	86857412	-1	ribosomal protein S6 [Source:MGI Symbol;Acc:MGI:98159]
ENSMUSG00000039496.8	471.923	0.325721	0.125178	2.60205	0.00926671	0.332851	ENSMUSG00000039496.8	ENSMUSG00000039496	Cdnf	2	3513030	3526376	3513065	1	cerebral dopamine neurotrophic factor [Source:MGI Symbol;Acc:MGI:3606576]
ENSMUSG00000030107.10	131.282	-0.640758	0.246352	-2.60098	0.00929576	0.333236	ENSMUSG00000030107.10	ENSMUSG00000030107	Usp18	6	121245906	121270917	121245906	1	ubiquitin specific peptidase 18 [Source:MGI Symbol;Acc:MGI:1344364]
ENSMUSG00000027806.9	1821.58	0.210743	0.0811378	2.59734	0.00939491	0.336127	ENSMUSG00000027806.9	ENSMUSG00000027806	Tsc22d2	3	58414715	58466783	58414715	1	TSC22 domain family, member 2 [Source:MGI Symbol;Acc:MGI:1919283]
ENSMUSG00000059775.5	7.62404	-3.97336	1.53123	-2.59488	0.00946242	0.337877	ENSMUSG00000059775.5	ENSMUSG00000059775	Rps26-ps1	8	107439131	107439579	107439579	-1	ribosomal protein S26, pseudogene 1 [Source:MGI Symbol;Acc:MGI:3704322]
ENSMUSG00000092544.8	8.89246	-2.14899	0.829627	-2.5903	0.00958915	0.339348	ENSMUSG00000092544.8	ENSMUSG00000092544	Gm20422	8	69742862	69774886	69774886	-1	predicted gene 20422 [Source:MGI Symbol;Acc:MGI:5141887]
ENSMUSG00000030351.5	274.862	-0.575043	0.222018	-2.59008	0.0095954	0.339348	ENSMUSG00000030351.5	ENSMUSG00000030351	Tspan11	6	127887589	127953977	127887589	1	tetraspanin 11 [Source:MGI Symbol;Acc:MGI:1915748]
ENSMUSG00000052613.16	87.575	0.766552	0.295966	2.59	0.00959768	0.339348	ENSMUSG00000052613.16	ENSMUSG00000052613	Pcdh15	10	73099342	74649737	73821867	1	protocadherin 15 [Source:MGI Symbol;Acc:MGI:1891428]
ENSMUSG00000029126.7	4913.54	0.180703	0.0697764	2.58974	0.00960488	0.339348	ENSMUSG00000029126.7	ENSMUSG00000029126	Nsg1	5	38137192	38159907	38159907	-1	neuron specific gene family member 1 [Source:MGI Symbol;Acc:MGI:109149]
ENSMUSG00000030533.16	4126.68	0.141667	0.0547103	2.58939	0.00961453	0.339348	ENSMUSG00000030533.16	ENSMUSG00000030533	Unc45a	7	80325292	80347993	80341480	-1	unc-45 myosin chaperone A [Source:MGI Symbol;Acc:MGI:2142246]
ENSMUSG00000054519.8	186.908	-0.471112	0.181942	-2.58935	0.00961563	0.339348	ENSMUSG00000054519.8	ENSMUSG00000054519	Zfp867	11	59461197	59472474	59472474	-1	zinc finger protein 867 [Source:MGI Symbol;Acc:MGI:2681848]
ENSMUSG00000047904.6	361.102	0.335631	0.129741	2.58692	0.0096837	0.341088	ENSMUSG00000047904.6	ENSMUSG00000047904	Sstr2	11	113619342	113626028	113619342	1	somatostatin receptor 2 [Source:MGI Symbol;Acc:MGI:98328]
ENSMUSG00000028681.11	79.5941	-0.670876	0.259539	-2.58487	0.00974158	0.342463	ENSMUSG00000028681.11	ENSMUSG00000028681	Ptch2	4	117096075	117116101	117096075	1	patched 2 [Source:MGI Symbol;Acc:MGI:1095405]
ENSMUSG00000091987.8	3.38228	5.17173	2.00368	2.58111	0.00984831	NA	ENSMUSG00000091987.8	ENSMUSG00000091987	Gm10352	Y	2900989	2912206	2900989	1	predicted gene 10352 [Source:MGI Symbol;Acc:MGI:3708825]
ENSMUSG00000021876.15	955.637	-0.227042	0.087979	-2.58063	0.0098619	0.346023	ENSMUSG00000021876.15	ENSMUSG00000021876	Rnase4	14	51091077	51106151	51091077	1	ribonuclease, RNase A family 4 [Source:MGI Symbol;Acc:MGI:1926217]
ENSMUSG00000057346.12	33.4961	-1.52379	0.590937	-2.5786	0.0099202	0.346318	ENSMUSG00000057346.12	ENSMUSG00000057346	Apol9a	15	77403789	77411135	77411034	-1	apolipoprotein L 9a [Source:MGI Symbol;Acc:MGI:3606001]
ENSMUSG00000079418.3	622.327	-0.259609	0.10068	-2.57856	0.00992137	0.346318	ENSMUSG00000079418.3	ENSMUSG00000079418	Atg4a	X	140956907	141164270	140956907	1	autophagy related 4A, cysteine peptidase [Source:MGI Symbol;Acc:MGI:2147903]
ENSMUSG00000074063.10	87.6614	-0.942034	0.365364	-2.57835	0.00992747	0.346318	ENSMUSG00000074063.10	ENSMUSG00000074063	Osgin1	8	119434124	119446256	119434124	1	oxidative stress induced growth inhibitor 1 [Source:MGI Symbol;Acc:MGI:1919089]
ENSMUSG00000003411.10	603.321	0.31056	0.120559	2.576	0.00999494	0.348004	ENSMUSG00000003411.10	ENSMUSG00000003411	Rab3b	4	108879063	108943324	108879063	1	RAB3B, member RAS oncogene family [Source:MGI Symbol;Acc:MGI:1917158]
ENSMUSG00000047215.14	7521.37	-0.150712	0.0585431	-2.57438	0.0100421	0.348977	ENSMUSG00000047215.14	ENSMUSG00000047215	Rpl9	5	65388364	65391444	65388914	-1	ribosomal protein L9 [Source:MGI Symbol;Acc:MGI:1298373]
ENSMUSG00000037095.8	126.503	-0.768793	0.299493	-2.56698	0.010259	0.355833	ENSMUSG00000037095.8	ENSMUSG00000037095	Lrg1	17	56119678	56122001	56122001	-1	leucine-rich alpha-2-glycoprotein 1 [Source:MGI Symbol;Acc:MGI:1924155]
ENSMUSG00000087090.7	16.6111	-2.47804	0.965759	-2.5659	0.0102909	0.356263	ENSMUSG00000087090.7	ENSMUSG00000087090	Nctc1	7	142544609	142558596	142558596	-1	non-coding transcript 1 [Source:MGI Symbol;Acc:MGI:1306816]
ENSMUSG00000040584.8	1448.61	-0.281252	0.109782	-2.5619	0.01041	0.359699	ENSMUSG00000040584.8	ENSMUSG00000040584	Abcb1a	5	8660077	8748575	8660077	1	ATP-binding cassette, sub-family B (MDR/TAP), member 1A [Source:MGI Symbol;Acc:MGI:97570]
ENSMUSG00000011263.16	113.354	-0.642637	0.250955	-2.56077	0.0104442	0.359807	ENSMUSG00000011263.16	ENSMUSG00000011263	Exoc3l2	7	19463331	19496762	19463331	1	exocyst complex component 3-like 2 [Source:MGI Symbol;Acc:MGI:1921713]
ENSMUSG00000031204.3	8.09529	-2.46126	0.961248	-2.56048	0.0104527	0.359807	ENSMUSG00000031204.3	ENSMUSG00000031204	Asb12	X	95470201	95557987	95478129	-1	ankyrin repeat and SOCS box-containing 12 [Source:MGI Symbol;Acc:MGI:1917642]
ENSMUSG00000032846.10	2021.2	0.154211	0.060247	2.55964	0.010478	0.359995	ENSMUSG00000032846.10	ENSMUSG00000032846	Zswim6	13	107724617	107890064	107890064	-1	zinc finger SWIM-type containing 6 [Source:MGI Symbol;Acc:MGI:1914513]
ENSMUSG00000017801.15	911.852	-0.269932	0.105502	-2.55855	0.0105109	0.360293	ENSMUSG00000017801.15	ENSMUSG00000017801	Mlx	11	101087277	101092207	101087277	1	MAX-like protein X [Source:MGI Symbol;Acc:MGI:108398]
ENSMUSG00000046634.12	11.1982	-3.85067	1.50532	-2.55804	0.0105263	0.360293	ENSMUSG00000046634.12	ENSMUSG00000046634	Pkd1l1	11	8826708	8973266	8973266	-1	polycystic kidney disease 1 like 1 [Source:MGI Symbol;Acc:MGI:2156538]
ENSMUSG00000078532.9	313.526	-0.415764	0.162623	-2.55661	0.0105699	0.361104	ENSMUSG00000078532.9	ENSMUSG00000078532	Nkain1	4	130531602	130574173	130573966	-1	Na+/K+ transporting ATPase interacting 1 [Source:MGI Symbol;Acc:MGI:1914399]
ENSMUSG00000083563.1	159.778	-0.522247	0.204489	-2.55392	0.0106519	0.362515	ENSMUSG00000083563.1	ENSMUSG00000083563	Gm13340	2	22588103	22589647	22589647	-1	predicted gene 13340 [Source:MGI Symbol;Acc:MGI:3650227]
ENSMUSG00000071528.4	3213.47	-0.159887	0.0626095	-2.55371	0.0106581	0.362515	ENSMUSG00000071528.4	ENSMUSG00000071528	Atp5md	19	47083464	47090647	47090625	-1	ATP synthase membrane subunit DAPIT [Source:MGI Symbol;Acc:MGI:1891435]
ENSMUSG00000062077.14	59.0866	-3.38111	1.32451	-2.55273	0.0106883	0.362515	ENSMUSG00000062077.14	ENSMUSG00000062077	Trim54	5	31116712	31137630	31116712	1	tripartite motif-containing 54 [Source:MGI Symbol;Acc:MGI:1889623]
ENSMUSG00000022358.7	905.539	-0.324849	0.12726	-2.55264	0.010691	0.362515	ENSMUSG00000022358.7	ENSMUSG00000022358	Fbxo32	15	58175879	58214932	58214932	-1	F-box protein 32 [Source:MGI Symbol;Acc:MGI:1914981]
ENSMUSG00000030246.12	16644.3	0.128633	0.0504382	2.55032	0.0107625	0.364263	ENSMUSG00000030246.12	ENSMUSG00000030246	Ldhb	6	142490249	142507957	142495648	-1	lactate dehydrogenase B [Source:MGI Symbol;Acc:MGI:96763]
ENSMUSG00000031167.16	5456.92	0.15051	0.0590487	2.54892	0.0108058	0.365046	ENSMUSG00000031167.16	ENSMUSG00000031167	Rbm3	X	8138975	8145880	8142918	-1	RNA binding motif (RNP1, RRM) protein 3 [Source:MGI Symbol;Acc:MGI:1099460]
ENSMUSG00000053025.13	15086.8	0.158985	0.0624005	2.54782	0.0108398	0.365296	ENSMUSG00000053025.13	ENSMUSG00000053025	Sv2b	7	75114894	75309262	75309262	-1	synaptic vesicle glycoprotein 2 b [Source:MGI Symbol;Acc:MGI:1927338]
ENSMUSG00000038503.15	2263.3	0.164185	0.0644524	2.54739	0.0108533	0.365296	ENSMUSG00000038503.15	ENSMUSG00000038503	Mesd	7	83884466	83901532	83884466	1	mesoderm development LRP chaperone [Source:MGI Symbol;Acc:MGI:1891421]
ENSMUSG00000021390.6	6735.94	-0.176089	0.0692806	-2.54168	0.0110322	0.370136	ENSMUSG00000021390.6	ENSMUSG00000021390	Ogn	13	49608046	49624501	49608046	1	osteoglycin [Source:MGI Symbol;Acc:MGI:109278]
ENSMUSG00000073489.6	59.2181	-0.76842	0.302394	-2.54112	0.0110497	0.370136	ENSMUSG00000073489.6	ENSMUSG00000073489	Ifi204	1	173747293	173766943	173766919	-1	interferon activated gene 204 [Source:MGI Symbol;Acc:MGI:96429]
ENSMUSG00000092341.3	13265.1	-0.434897	0.171162	-2.54085	0.0110583	0.370136	ENSMUSG00000092341.3	ENSMUSG00000092341	Malat1	19	5795690	5802672	5802672	-1	metastasis associated lung adenocarcinoma transcript 1 (non-coding RNA) [Source:MGI Symbol;Acc:MGI:1919539]
ENSMUSG00000046167.5	1189.46	0.268218	0.105688	2.53782	0.0111544	0.372668	ENSMUSG00000046167.5	ENSMUSG00000046167	Gldn	9	54286486	54341786	54286486	1	gliomedin [Source:MGI Symbol;Acc:MGI:2388361]
ENSMUSG00000030302.16	9504.12	0.17057	0.0672489	2.5364	0.0111998	0.373499	ENSMUSG00000030302.16	ENSMUSG00000030302	Atp2b2	6	113743831	114042613	114042026	-1	ATPase, Ca++ transporting, plasma membrane 2 [Source:MGI Symbol;Acc:MGI:105368]
ENSMUSG00000028710.18	3317.78	0.135432	0.0534407	2.53426	0.0112686	0.375104	ENSMUSG00000028710.18	ENSMUSG00000028710	Atpaf1	4	115784812	115822655	115784812	1	ATP synthase mitochondrial F1 complex assembly factor 1 [Source:MGI Symbol;Acc:MGI:2180560]
ENSMUSG00000028218.19	1169.66	0.19594	0.0773375	2.53357	0.0112907	0.375152	ENSMUSG00000028218.19	ENSMUSG00000028218	Fam92a	4	12153409	12172015	12172015	-1	family with sequence similarity 92, member A [Source:MGI Symbol;Acc:MGI:1915349]
ENSMUSG00000022212.15	19844.2	0.139982	0.0552821	2.53214	0.0113368	0.375981	ENSMUSG00000022212.15	ENSMUSG00000022212	Cpne6	14	55510445	55517431	55510445	1	copine VI [Source:MGI Symbol;Acc:MGI:1334445]
ENSMUSG00000041757.17	20940.1	0.12195	0.0481916	2.53053	0.011389	0.375981	ENSMUSG00000041757.17	ENSMUSG00000041757	Plekha6	1	133164210	133303435	133164210	1	pleckstrin homology domain containing, family A member 6 [Source:MGI Symbol;Acc:MGI:2388662]
ENSMUSG00000035521.13	1675.86	0.163616	0.0646615	2.53034	0.0113951	0.375981	ENSMUSG00000035521.13	ENSMUSG00000035521	Gnptg	17	25233331	25240124	25240116	-1	N-acetylglucosamine-1-phosphotransferase, gamma subunit [Source:MGI Symbol;Acc:MGI:2147006]
ENSMUSG00000024085.13	591.708	-0.273517	0.108099	-2.53024	0.0113984	0.375981	ENSMUSG00000024085.13	ENSMUSG00000024085	Man2a1	17	64600736	64755110	64600736	1	mannosidase 2, alpha 1 [Source:MGI Symbol;Acc:MGI:104669]
ENSMUSG00000031782.15	1321.75	0.278801	0.110216	2.52959	0.0114197	0.376003	ENSMUSG00000031782.15	ENSMUSG00000031782	Coq9	8	94838321	94854895	94838321	1	coenzyme Q9 [Source:MGI Symbol;Acc:MGI:1915164]
ENSMUSG00000050359.7	70.7035	-3.00445	1.18811	-2.52877	0.0114462	0.376193	ENSMUSG00000050359.7	ENSMUSG00000050359	Sprr1a	3	92483952	92485895	92485895	-1	small proline-rich protein 1A [Source:MGI Symbol;Acc:MGI:106660]
ENSMUSG00000027340.15	3641.21	0.148646	0.058807	2.5277	0.0114813	0.376667	ENSMUSG00000027340.15	ENSMUSG00000027340	Slc23a2	2	132052496	132145108	132145108	-1	solute carrier family 23 (nucleobase transporters), member 2 [Source:MGI Symbol;Acc:MGI:1859682]
ENSMUSG00000063109.13	11.9602	-1.75137	0.693273	-2.52624	0.011529	0.377548	ENSMUSG00000063109.13	ENSMUSG00000063109	Dgkeos	11	89064729	89069098	89066088	1	diacylglycerol kinase, epsilon, opposite strand [Source:MGI Symbol;Acc:MGI:3041185]
ENSMUSG00000019986.17	2310.16	0.151918	0.0601662	2.52498	0.0115706	0.377595	ENSMUSG00000019986.17	ENSMUSG00000019986	Ahi1	10	20952547	21080429	20952547	1	Abelson helper integration site 1 [Source:MGI Symbol;Acc:MGI:87971]
ENSMUSG00000019726.12	2941.18	0.209113	0.0828623	2.52363	0.0116151	0.377595	ENSMUSG00000019726.12	ENSMUSG00000019726	Lyst	13	13590397	13778803	13590397	1	lysosomal trafficking regulator [Source:MGI Symbol;Acc:MGI:107448]
ENSMUSG00000032425.15	756.497	-0.246575	0.0977216	-2.52324	0.0116279	0.377595	ENSMUSG00000032425.15	ENSMUSG00000032425	Zfp949	9	88548020	88571061	88548020	1	zinc finger protein 949 [Source:MGI Symbol;Acc:MGI:1918890]
ENSMUSG00000115167.1	70.968	0.840145	0.332978	2.52312	0.0116317	0.377595	ENSMUSG00000115167.1	ENSMUSG00000115167	Gm49015	14	79146259	79151389	79151389	-1	predicted gene, 49015 [Source:MGI Symbol;Acc:MGI:6118375]
ENSMUSG00000027864.9	3067.56	-0.161064	0.0638372	-2.52305	0.0116343	0.377595	ENSMUSG00000027864.9	ENSMUSG00000027864	Ptgfrn	3	101040232	101110278	101110278	-1	prostaglandin F2 receptor negative regulator [Source:MGI Symbol;Acc:MGI:1277114]
ENSMUSG00000087373.7	5.28494	-2.86797	1.13701	-2.52239	0.011656	NA	ENSMUSG00000087373.7	ENSMUSG00000087373	Gm15892	11	88059066	88067476	88059066	1	predicted gene 15892 [Source:MGI Symbol;Acc:MGI:3801833]
ENSMUSG00000031026.15	332.364	0.343647	0.136259	2.52202	0.0116684	0.378029	ENSMUSG00000031026.15	ENSMUSG00000031026	Trim66	7	109449006	109508134	109493738	-1	tripartite motif-containing 66 [Source:MGI Symbol;Acc:MGI:2152406]
ENSMUSG00000024302.16	4669.35	0.153875	0.0610455	2.52066	0.0117135	0.378709	ENSMUSG00000024302.16	ENSMUSG00000024302	Dtna	18	23415135	23659715	23415135	1	dystrobrevin alpha [Source:MGI Symbol;Acc:MGI:106039]
ENSMUSG00000038521.17	625.251	-0.250954	0.0996023	-2.51956	0.0117502	0.378709	ENSMUSG00000038521.17	ENSMUSG00000038521	C1s1	6	124530345	124542359	124542321	-1	complement component 1, s subcomponent 1 [Source:MGI Symbol;Acc:MGI:1355312]
ENSMUSG00000052516.19	10367.8	0.207059	0.082237	2.51783	0.0118079	0.378709	ENSMUSG00000052516.19	ENSMUSG00000052516	Robo2	16	73891839	74411825	74410989	-1	roundabout guidance receptor 2 [Source:MGI Symbol;Acc:MGI:1890110]
ENSMUSG00000052305.6	8505.07	0.66928	0.265943	2.51663	0.0118483	0.378709	ENSMUSG00000052305.6	ENSMUSG00000052305	Hbb-bs	7	103826534	103828096	103827928	-1	hemoglobin, beta adult s chain [Source:MGI Symbol;Acc:MGI:5474852]
ENSMUSG00000020875.9	1007.75	0.206881	0.082218	2.51625	0.011861	0.378709	ENSMUSG00000020875.9	ENSMUSG00000020875	Hoxb9	11	96271457	96276595	96271457	1	homeobox B9 [Source:MGI Symbol;Acc:MGI:96190]
ENSMUSG00000018401.17	7236.07	0.109321	0.0434487	2.5161	0.011866	0.378709	ENSMUSG00000018401.17	ENSMUSG00000018401	Mtmr4	11	87592162	87616302	87592162	1	myotubularin related protein 4 [Source:MGI Symbol;Acc:MGI:2180699]
ENSMUSG00000054074.9	327.331	0.355462	0.141279	2.51603	0.0118686	0.378709	ENSMUSG00000054074.9	ENSMUSG00000054074	Skida1	2	18040676	18049051	18044572	-1	SKI/DACH domain containing 1 [Source:MGI Symbol;Acc:MGI:1919918]
ENSMUSG00000039376.13	51.2791	-1.56344	0.62144	-2.51583	0.0118752	0.378709	ENSMUSG00000039376.13	ENSMUSG00000039376	Synpo2l	14	20658946	20668354	20668306	-1	synaptopodin 2-like [Source:MGI Symbol;Acc:MGI:1916010]
ENSMUSG00000033902.12	814.878	-0.269857	0.107266	-2.51578	0.011877	0.378709	ENSMUSG00000033902.12	ENSMUSG00000033902	Mapkbp1	2	119972699	120027408	119972699	1	mitogen-activated protein kinase binding protein 1 [Source:MGI Symbol;Acc:MGI:1347004]
ENSMUSG00000051390.10	1721.91	-0.172626	0.068661	-2.51418	0.011931	0.378954	ENSMUSG00000051390.10	ENSMUSG00000051390	Zbtb22	17	33915904	33919325	33915904	1	zinc finger and BTB domain containing 22 [Source:MGI Symbol;Acc:MGI:1931870]
ENSMUSG00000027257.13	583.08	-0.293754	0.11684	-2.51416	0.0119316	0.378954	ENSMUSG00000027257.13	ENSMUSG00000027257	Pacsin3	2	91255954	91264679	91257329	1	protein kinase C and casein kinase substrate in neurons 3 [Source:MGI Symbol;Acc:MGI:1891410]
ENSMUSG00000016918.15	1878.42	-0.174998	0.0696337	-2.51313	0.0119666	0.378954	ENSMUSG00000016918.15	ENSMUSG00000016918	Sulf1	1	12692277	12861192	12692277	1	sulfatase 1 [Source:MGI Symbol;Acc:MGI:2138563]
ENSMUSG00000066191.12	547.923	-0.299561	0.119201	-2.51308	0.0119681	0.378954	ENSMUSG00000066191.12	ENSMUSG00000066191	Anks6	4	47015669	47057427	47057306	-1	ankyrin repeat and sterile alpha motif domain containing 6 [Source:MGI Symbol;Acc:MGI:1922941]
ENSMUSG00000038011.15	34.3157	1.38436	0.551126	2.51187	0.0120094	0.379601	ENSMUSG00000038011.15	ENSMUSG00000038011	Dnah10	5	124725085	124834308	124725085	1	dynein, axonemal, heavy chain 10 [Source:MGI Symbol;Acc:MGI:1860299]
ENSMUSG00000007805.4	17.159	-1.42795	0.568811	-2.51041	0.0120591	0.380511	ENSMUSG00000007805.4	ENSMUSG00000007805	Twist2	1	91801461	91848028	91801461	1	twist basic helix-loop-helix transcription factor 2 [Source:MGI Symbol;Acc:MGI:104685]
ENSMUSG00000021703.9	10121.9	0.102187	0.0407309	2.50884	0.012113	0.381036	ENSMUSG00000021703.9	ENSMUSG00000021703	Serinc5	13	92611091	92711947	92611091	1	serine incorporator 5 [Source:MGI Symbol;Acc:MGI:2444223]
ENSMUSG00000002831.14	241.251	-1.30551	0.520587	-2.50776	0.0121499	0.381036	ENSMUSG00000002831.14	ENSMUSG00000002831	Plin4	17	56100591	56109803	56109803	-1	perilipin 4 [Source:MGI Symbol;Acc:MGI:1929709]
ENSMUSG00000024378.9	5370.39	0.117334	0.0468004	2.50711	0.0121723	0.381036	ENSMUSG00000024378.9	ENSMUSG00000024378	Stard4	18	33199355	33213862	33213862	-1	StAR-related lipid transfer (START) domain containing 4 [Source:MGI Symbol;Acc:MGI:2156764]
ENSMUSG00000061104.5	3309.15	0.125381	0.0500134	2.50696	0.0121776	0.381036	ENSMUSG00000061104.5	ENSMUSG00000061104	Sap18b	8	95825346	95826134	95825346	1	Sin3-associated polypeptide 18B [Source:MGI Symbol;Acc:MGI:3704317]
ENSMUSG00000056116.18	1373.78	-0.202377	0.0807352	-2.50668	0.0121872	0.381036	ENSMUSG00000056116.18	ENSMUSG00000056116	H2-T22	17	36037128	36042747	36042500	-1	histocompatibility 2, T region locus 22 [Source:MGI Symbol;Acc:MGI:95956]
ENSMUSG00000025278.9	3106.4	-0.488814	0.195037	-2.50626	0.0122015	0.381036	ENSMUSG00000025278.9	ENSMUSG00000025278	Flnb	14	7817957	7951588	7817957	1	filamin, beta [Source:MGI Symbol;Acc:MGI:2446089]
ENSMUSG00000035441.14	2853.07	0.167331	0.066833	2.50372	0.0122895	0.383006	ENSMUSG00000035441.14	ENSMUSG00000035441	Myo1d	11	80482126	80780025	80780025	-1	myosin ID [Source:MGI Symbol;Acc:MGI:107728]
ENSMUSG00000024107.7	272.591	-0.568608	0.22716	-2.50312	0.0123105	0.383006	ENSMUSG00000024107.7	ENSMUSG00000024107	Lhcgr	17	88716481	88791990	88774056	-1	luteinizing hormone/choriogonadotropin receptor [Source:MGI Symbol;Acc:MGI:96783]
ENSMUSG00000025574.13	110.549	-0.663976	0.265313	-2.50262	0.0123278	0.383006	ENSMUSG00000025574.13	ENSMUSG00000025574	Tk1	11	117815526	117826092	117826092	-1	thymidine kinase 1 [Source:MGI Symbol;Acc:MGI:98763]
ENSMUSG00000036913.15	5769.78	0.116771	0.0466742	2.50183	0.0123554	0.383207	ENSMUSG00000036913.15	ENSMUSG00000036913	Trim67	8	124793092	124834713	124793092	1	tripartite motif-containing 67 [Source:MGI Symbol;Acc:MGI:3045323]
ENSMUSG00000002416.13	2681.58	-0.14434	0.0577126	-2.50101	0.0123839	0.383435	ENSMUSG00000002416.13	ENSMUSG00000002416	Ndufb2	6	39592574	39603382	39592574	1	NADH:ubiquinone oxidoreductase subunit B2 [Source:MGI Symbol;Acc:MGI:1915448]
ENSMUSG00000074676.2	93.1262	-0.605688	0.242396	-2.49875	0.0124632	0.383447	ENSMUSG00000074676.2	ENSMUSG00000074676	Foxs1	2	152931898	152933208	152933208	-1	forkhead box S1 [Source:MGI Symbol;Acc:MGI:95546]
ENSMUSG00000030002.15	1633.15	-0.207594	0.0830894	-2.49844	0.0124743	0.383447	ENSMUSG00000030002.15	ENSMUSG00000030002	Dusp11	6	85942268	85961667	85961667	-1	dual specificity phosphatase 11 (RNA/RNP complex 1-interacting) [Source:MGI Symbol;Acc:MGI:1919352]
ENSMUSG00000022508.5	2119.43	0.230906	0.0924291	2.49819	0.0124829	0.383447	ENSMUSG00000022508.5	ENSMUSG00000022508	Bcl6	16	23965052	23988852	23988852	-1	B cell leukemia/lymphoma 6 [Source:MGI Symbol;Acc:MGI:107187]
ENSMUSG00000073702.11	3328.94	-0.179406	0.0718196	-2.49801	0.0124891	0.383447	ENSMUSG00000073702.11	ENSMUSG00000073702	Rpl31	1	39367842	39371911	39367842	1	ribosomal protein L31 [Source:MGI Symbol;Acc:MGI:2149632]
ENSMUSG00000035517.17	4065.69	0.141947	0.0568242	2.498	0.0124897	0.383447	ENSMUSG00000035517.17	ENSMUSG00000035517	Tdrd7	4	45965334	46034761	45965334	1	tudor domain containing 7 [Source:MGI Symbol;Acc:MGI:2140279]
ENSMUSG00000011256.16	5756.05	-0.157782	0.0632478	-2.49466	0.0126076	0.386352	ENSMUSG00000011256.16	ENSMUSG00000011256	Adam19	11	46055992	46147343	46055992	1	a disintegrin and metallopeptidase domain 19 (meltrin beta) [Source:MGI Symbol;Acc:MGI:105377]
ENSMUSG00000021892.14	1879.31	-0.19422	0.0778711	-2.49412	0.0126268	0.386352	ENSMUSG00000021892.14	ENSMUSG00000021892	Sh3bp5	14	31359880	31436078	31436078	-1	SH3-domain binding protein 5 (BTK-associated) [Source:MGI Symbol;Acc:MGI:1344391]
ENSMUSG00000020857.11	2645.5	-0.262938	0.10555	-2.49111	0.0127344	0.388987	ENSMUSG00000020857.11	ENSMUSG00000020857	Nme2	11	93949814	93956259	93956259	-1	NME/NM23 nucleoside diphosphate kinase 2 [Source:MGI Symbol;Acc:MGI:97356]
ENSMUSG00000024151.13	2739.24	0.207597	0.0833622	2.4903	0.0127635	0.389224	ENSMUSG00000024151.13	ENSMUSG00000024151	Msh2	17	87672330	87723713	87672330	1	mutS homolog 2 [Source:MGI Symbol;Acc:MGI:101816]
ENSMUSG00000020170.4	2136.44	0.153655	0.0617298	2.48916	0.0128045	0.38982	ENSMUSG00000020170.4	ENSMUSG00000020170	Frs2	10	117069427	117148534	117148510	-1	fibroblast growth factor receptor substrate 2 [Source:MGI Symbol;Acc:MGI:1100860]
ENSMUSG00000067653.12	486.214	-2.23025	0.896368	-2.48809	0.012843	0.390111	ENSMUSG00000067653.12	ENSMUSG00000067653	Ankrd23	1	36530188	36536883	36536521	-1	ankyrin repeat domain 23 [Source:MGI Symbol;Acc:MGI:1925571]
ENSMUSG00000007872.3	2177.73	0.185401	0.0745348	2.48745	0.0128663	0.390111	ENSMUSG00000007872.3	ENSMUSG00000007872	Id3	4	136143497	136145755	136143497	1	inhibitor of DNA binding 3 [Source:MGI Symbol;Acc:MGI:96398]
ENSMUSG00000029581.14	2335.17	0.155137	0.0623763	2.48711	0.0128785	0.390111	ENSMUSG00000029581.14	ENSMUSG00000029581	Fscn1	5	142960343	142973185	142960343	1	fascin actin-bundling protein 1 [Source:MGI Symbol;Acc:MGI:1352745]
ENSMUSG00000006932.17	23904.4	0.10287	0.0413735	2.48639	0.0129048	0.390258	ENSMUSG00000006932.17	ENSMUSG00000006932	Ctnnb1	9	120929216	120960507	120929216	1	catenin (cadherin associated protein), beta 1 [Source:MGI Symbol;Acc:MGI:88276]
ENSMUSG00000070031.11	59.0066	-0.791625	0.318674	-2.48412	0.012987	0.391364	ENSMUSG00000070031.11	ENSMUSG00000070031	Sp140	1	85600378	85645037	85600378	1	Sp140 nuclear body protein [Source:MGI Symbol;Acc:MGI:3702467]
ENSMUSG00000036882.7	1150.87	-0.203545	0.0819651	-2.48331	0.0130168	0.391364	ENSMUSG00000036882.7	ENSMUSG00000036882	Arhgap33	7	30522226	30535060	30535009	-1	Rho GTPase activating protein 33 [Source:MGI Symbol;Acc:MGI:2673998]
ENSMUSG00000028480.14	615.88	-0.267892	0.107905	-2.48267	0.0130401	0.391364	ENSMUSG00000028480.14	ENSMUSG00000028480	Glipr2	4	43957401	43979118	43957401	1	GLI pathogenesis-related 2 [Source:MGI Symbol;Acc:MGI:1917770]
ENSMUSG00000059895.13	1803.37	-0.228599	0.0920849	-2.48248	0.013047	0.391364	ENSMUSG00000059895.13	ENSMUSG00000059895	Ptp4a3	15	73723145	73758766	73723145	1	protein tyrosine phosphatase 4a3 [Source:MGI Symbol;Acc:MGI:1277098]
ENSMUSG00000032440.13	2263.3	-0.173905	0.0700542	-2.48243	0.0130491	0.391364	ENSMUSG00000032440.13	ENSMUSG00000032440	Tgfbr2	9	116084293	116175360	116175265	-1	transforming growth factor, beta receptor II [Source:MGI Symbol;Acc:MGI:98729]
ENSMUSG00000051606.5	30.0941	-1.16769	0.470754	-2.48047	0.0131211	0.392876	ENSMUSG00000051606.5	ENSMUSG00000051606	2010001K21Rik	13	46979908	47011195	46979908	1	RIKEN cDNA 2010001K21 gene [Source:MGI Symbol;Acc:MGI:1917079]
ENSMUSG00000084274.2	9.4358	2.2578	0.910524	2.47967	0.0131502	0.393101	ENSMUSG00000084274.2	ENSMUSG00000084274	Gm12504	4	44121893	44124123	44121893	1	predicted pseudogene 12504 [Source:MGI Symbol;Acc:MGI:3651567]
ENSMUSG00000042408.13	677.434	-0.353816	0.142746	-2.47865	0.0131882	0.393589	ENSMUSG00000042408.13	ENSMUSG00000042408	Zmym6	4	127077383	127124372	127077383	1	zinc finger, MYM-type 6 [Source:MGI Symbol;Acc:MGI:106505]
ENSMUSG00000003037.16	1596.85	0.203548	0.0821808	2.47683	0.0132557	0.394954	ENSMUSG00000003037.16	ENSMUSG00000003037	Rab8a	8	72161200	72183904	72161200	1	RAB8A, member RAS oncogene family [Source:MGI Symbol;Acc:MGI:96960]
ENSMUSG00000021484.8	3884.12	-0.120934	0.0488685	-2.47469	0.0133353	0.396677	ENSMUSG00000021484.8	ENSMUSG00000021484	Lman2	13	55343833	55362783	55362783	-1	lectin, mannose-binding 2 [Source:MGI Symbol;Acc:MGI:1914140]
ENSMUSG00000102623.1	3.7222	-4.34888	1.75741	-2.47459	0.0133388	NA	ENSMUSG00000102623.1	ENSMUSG00000102623	Gm37673	6	40098722	40101172	40098722	1	predicted gene, 37673 [Source:MGI Symbol;Acc:MGI:5610901]
ENSMUSG00000040600.9	7.89352	2.67654	1.08224	2.47314	0.0133931	0.397744	ENSMUSG00000040600.9	ENSMUSG00000040600	Eps8l3	3	107877229	107892900	107877229	1	EPS8-like 3 [Source:MGI Symbol;Acc:MGI:2139743]
ENSMUSG00000032495.8	37.6715	-1.61677	0.653949	-2.47231	0.0134242	0.398018	ENSMUSG00000032495.8	ENSMUSG00000032495	Lrrc2	9	110951545	110984066	110951545	1	leucine rich repeat containing 2 [Source:MGI Symbol;Acc:MGI:1921499]
ENSMUSG00000030047.14	267.575	-0.362549	0.146789	-2.46986	0.0135164	0.399828	ENSMUSG00000030047.14	ENSMUSG00000030047	Arhgap25	6	87458545	87533259	87496314	-1	Rho GTPase activating protein 25 [Source:MGI Symbol;Acc:MGI:2443687]
ENSMUSG00000036395.15	725.7	0.25155	0.10188	2.46908	0.0135461	0.399828	ENSMUSG00000036395.15	ENSMUSG00000036395	Glb1l2	9	26763044	26806468	26806432	-1	galactosidase, beta 1-like 2 [Source:MGI Symbol;Acc:MGI:2388283]
ENSMUSG00000047721.8	1412.02	-0.181784	0.0736362	-2.46868	0.0135613	0.399828	ENSMUSG00000047721.8	ENSMUSG00000047721	Bola2	7	126695401	126699798	126695401	1	bolA-like 2 (E. coli) [Source:MGI Symbol;Acc:MGI:1913412]
ENSMUSG00000032290.7	5306.88	-0.140712	0.0570173	-2.46788	0.0135916	0.399828	ENSMUSG00000032290.7	ENSMUSG00000032290	Ptpn9	9	56994923	57062807	56994923	1	protein tyrosine phosphatase, non-receptor type 9 [Source:MGI Symbol;Acc:MGI:1928376]
ENSMUSG00000028339.17	2892.12	-0.167842	0.0680132	-2.46778	0.0135952	0.399828	ENSMUSG00000028339.17	ENSMUSG00000028339	Col15a1	4	47208161	47313167	47208161	1	collagen, type XV, alpha 1 [Source:MGI Symbol;Acc:MGI:88449]
ENSMUSG00000090942.1	25.7311	-1.61777	0.656066	-2.46586	0.0136685	0.400784	ENSMUSG00000090942.1	ENSMUSG00000090942	F830016B08Rik	18	60293380	60303016	60293380	1	RIKEN cDNA F830016B08 gene [Source:MGI Symbol;Acc:MGI:3588218]
ENSMUSG00000029246.14	1026.03	0.21487	0.0871413	2.46577	0.0136718	0.400784	ENSMUSG00000029246.14	ENSMUSG00000029246	Ppat	5	76913249	76951578	76951572	-1	phosphoribosyl pyrophosphate amidotransferase [Source:MGI Symbol;Acc:MGI:2387203]
ENSMUSG00000058897.18	389.135	0.304116	0.123398	2.46451	0.01372	0.401517	ENSMUSG00000058897.18	ENSMUSG00000058897	Col25a1	3	130131501	130599877	130131501	1	collagen, type XXV, alpha 1 [Source:MGI Symbol;Acc:MGI:1924268]
ENSMUSG00000026193.15	1896.99	-0.216392	0.0878226	-2.46396	0.013741	0.401517	ENSMUSG00000026193.15	ENSMUSG00000026193	Fn1	1	71585520	71653200	71653172	-1	fibronectin 1 [Source:MGI Symbol;Acc:MGI:95566]
ENSMUSG00000052572.19	4049.35	0.1797	0.0729726	2.46257	0.0137947	0.402437	ENSMUSG00000052572.19	ENSMUSG00000052572	Dlg2	7	90476672	92449247	90476672	1	discs large MAGUK scaffold protein 2 [Source:MGI Symbol;Acc:MGI:1344351]
ENSMUSG00000025488.9	41.9294	-1.62329	0.659774	-2.46037	0.0138796	0.404264	ENSMUSG00000025488.9	ENSMUSG00000025488	Cox8b	7	140898945	140900446	140900446	-1	cytochrome c oxidase subunit 8B [Source:MGI Symbol;Acc:MGI:105958]
ENSMUSG00000069171.14	927.326	-0.297654	0.121011	-2.45972	0.0139045	0.404342	ENSMUSG00000069171.14	ENSMUSG00000069171	Nr2f1	13	78188973	78199757	78199757	-1	nuclear receptor subfamily 2, group F, member 1 [Source:MGI Symbol;Acc:MGI:1352451]
ENSMUSG00000048458.8	1950.34	0.193982	0.0789066	2.45837	0.0139568	0.405216	ENSMUSG00000048458.8	ENSMUSG00000048458	Inka2	3	105704599	105720842	105704599	1	inka box actin regulator 2 [Source:MGI Symbol;Acc:MGI:1923497]
ENSMUSG00000022075.7	4393.93	-0.135074	0.0549652	-2.45745	0.0139928	0.405238	ENSMUSG00000022075.7	ENSMUSG00000022075	Rhobtb2	14	69784990	69805636	69805636	-1	Rho-related BTB domain containing 2 [Source:MGI Symbol;Acc:MGI:2180557]
ENSMUSG00000016831.12	3617.1	-0.175958	0.071609	-2.45721	0.0140022	0.405238	ENSMUSG00000016831.12	ENSMUSG00000016831	Tox4	14	52279146	52296401	52279146	1	TOX high mobility group box family member 4 [Source:MGI Symbol;Acc:MGI:1915389]
ENSMUSG00000021820.18	23854.9	0.108791	0.044288	2.45644	0.0140321	0.405458	ENSMUSG00000021820.18	ENSMUSG00000021820	Camk2g	14	20734875	20794088	20794051	-1	calcium/calmodulin-dependent protein kinase II gamma [Source:MGI Symbol;Acc:MGI:88259]
ENSMUSG00000021094.10	1921.14	0.153002	0.0623058	2.45567	0.0140624	0.405555	ENSMUSG00000021094.10	ENSMUSG00000021094	Dhrs7	12	72650353	72664909	72664754	-1	dehydrogenase/reductase (SDR family) member 7 [Source:MGI Symbol;Acc:MGI:1913625]
ENSMUSG00000038174.14	4092.24	0.163298	0.0665108	2.45521	0.0140801	0.405555	ENSMUSG00000038174.14	ENSMUSG00000038174	Fam126b	1	58522806	58586323	58586323	-1	family with sequence similarity 126, member B [Source:MGI Symbol;Acc:MGI:1098784]
ENSMUSG00000026950.18	892.555	-2.34318	0.954711	-2.45434	0.0141144	0.405901	ENSMUSG00000026950.18	ENSMUSG00000026950	Neb	2	52136647	52378474	52223737	-1	nebulin [Source:MGI Symbol;Acc:MGI:97292]
ENSMUSG00000030208.15	679.86	-0.241884	0.098617	-2.45276	0.0141766	0.407044	ENSMUSG00000030208.15	ENSMUSG00000030208	Emp1	6	135362545	135383173	135362545	1	epithelial membrane protein 1 [Source:MGI Symbol;Acc:MGI:107941]
ENSMUSG00000044258.10	178.577	-0.729729	0.297764	-2.4507	0.014258	0.408738	ENSMUSG00000044258.10	ENSMUSG00000044258	Ctla2a	13	60934155	60936625	60936625	-1	cytotoxic T lymphocyte-associated protein 2 alpha [Source:MGI Symbol;Acc:MGI:88554]
ENSMUSG00000029798.11	257.295	-0.371115	0.151593	-2.4481	0.0143613	0.41105	ENSMUSG00000029798.11	ENSMUSG00000029798	Herc6	6	57581000	57664632	57581000	1	hect domain and RLD 6 [Source:MGI Symbol;Acc:MGI:1914388]
ENSMUSG00000021273.11	13721.7	0.111259	0.0454622	2.44729	0.0143936	0.411326	ENSMUSG00000021273.11	ENSMUSG00000021273	Fdft1	14	63145150	63179578	63164925	-1	farnesyl diphosphate farnesyl transferase 1 [Source:MGI Symbol;Acc:MGI:102706]
ENSMUSG00000021768.15	17.7848	-2.04507	0.837182	-2.4428	0.0145739	0.41522	ENSMUSG00000021768.15	ENSMUSG00000021768	Dusp13	14	21733394	21751181	21741476	-1	dual specificity phosphatase 13 [Source:MGI Symbol;Acc:MGI:1351599]
ENSMUSG00000002458.13	503.893	-0.312486	0.127953	-2.4422	0.0145981	0.41522	ENSMUSG00000002458.13	ENSMUSG00000002458	Rgs19	2	181688419	181693977	181693977	-1	regulator of G-protein signaling 19 [Source:MGI Symbol;Acc:MGI:1915153]
ENSMUSG00000044921.5	182.233	-0.448327	0.183604	-2.44182	0.0146135	0.41522	ENSMUSG00000044921.5	ENSMUSG00000044921	Rassf9	10	102512222	102549736	102512222	1	Ras association (RalGDS/AF-6) domain family (N-terminal) member 9 [Source:MGI Symbol;Acc:MGI:2384307]
ENSMUSG00000022008.4	2340.35	0.142	0.0581718	2.44105	0.0146445	0.41522	ENSMUSG00000022008.4	ENSMUSG00000022008	Gpalpp1	14	76086236	76110760	76110760	-1	GPALPP motifs containing 1 [Source:MGI Symbol;Acc:MGI:1914717]
ENSMUSG00000020435.17	1362.94	0.214204	0.0877581	2.44085	0.0146528	0.41522	ENSMUSG00000020435.17	ENSMUSG00000020435	Osbp2	11	3703731	3863903	3722216	-1	oxysterol binding protein 2 [Source:MGI Symbol;Acc:MGI:1921559]
ENSMUSG00000037996.17	26181.1	0.168109	0.0688831	2.4405	0.0146669	0.41522	ENSMUSG00000037996.17	ENSMUSG00000037996	Slc24a2	4	86983124	87230477	87230477	-1	solute carrier family 24 (sodium/potassium/calcium exchanger), member 2 [Source:MGI Symbol;Acc:MGI:1923626]
ENSMUSG00000027852.14	4565.16	0.129721	0.0531699	2.43974	0.0146976	0.415443	ENSMUSG00000027852.14	ENSMUSG00000027852	Nras	3	103058285	103067914	103058285	1	neuroblastoma ras oncogene [Source:MGI Symbol;Acc:MGI:97376]
ENSMUSG00000021303.14	614.034	0.258026	0.10587	2.4372	0.0148015	0.417729	ENSMUSG00000021303.14	ENSMUSG00000021303	Gng4	13	13784059	13827896	13784059	1	guanine nucleotide binding protein (G protein), gamma 4 [Source:MGI Symbol;Acc:MGI:102703]
ENSMUSG00000038387.9	1657.74	-0.161431	0.0662695	-2.43598	0.0148515	0.418491	ENSMUSG00000038387.9	ENSMUSG00000038387	Rras	7	45017961	45021647	45017961	1	related RAS viral (r-ras) oncogene [Source:MGI Symbol;Acc:MGI:98179]
ENSMUSG00000028878.11	1496.24	0.176321	0.0724298	2.43437	0.0149179	0.419711	ENSMUSG00000028878.11	ENSMUSG00000028878	Fam76a	4	132899213	132922558	132922558	-1	family with sequence similarity 76, member A [Source:MGI Symbol;Acc:MGI:2385211]
ENSMUSG00000059743.12	12739.3	0.107775	0.0442907	2.43336	0.0149595	0.420037	ENSMUSG00000059743.12	ENSMUSG00000059743	Fdps	3	89093588	89101959	89101888	-1	farnesyl diphosphate synthetase [Source:MGI Symbol;Acc:MGI:104888]
ENSMUSG00000101174.8	126.67	-0.496053	0.203925	-2.43252	0.014994	0.420037	ENSMUSG00000101174.8	ENSMUSG00000101174	Hoxd4	2	74711929	74729160	74711929	1	homeobox D4 [Source:MGI Symbol;Acc:MGI:96208]
ENSMUSG00000074483.2	11.0739	2.31143	0.950264	2.43241	0.0149989	0.420037	ENSMUSG00000074483.2	ENSMUSG00000074483	Bglap	3	88383501	88384464	88384433	-1	bone gamma carboxyglutamate protein [Source:MGI Symbol;Acc:MGI:88156]
ENSMUSG00000038884.14	902.155	-0.21433	0.0881569	-2.43123	0.0150476	0.420196	ENSMUSG00000038884.14	ENSMUSG00000038884	Shfl	9	20868642	20874307	20868642	1	shiftless antiviral inhibitor of ribosomal frameshifting [Source:MGI Symbol;Acc:MGI:2441788]
ENSMUSG00000025134.2	917.919	0.212362	0.0873504	2.43116	0.0150508	0.420196	ENSMUSG00000025134.2	ENSMUSG00000025134	Alyref	11	120592121	120598365	120598365	-1	Aly/REF export factor [Source:MGI Symbol;Acc:MGI:1341044]
ENSMUSG00000036896.5	347.053	-0.40653	0.167301	-2.42993	0.0151019	0.420976	ENSMUSG00000036896.5	ENSMUSG00000036896	C1qc	4	136889804	136893065	136893065	-1	complement component 1, q subcomponent, C chain [Source:MGI Symbol;Acc:MGI:88225]
ENSMUSG00000110195.1	5628.5	-0.105174	0.0433409	-2.42667	0.0152382	0.424124	ENSMUSG00000110195.1	ENSMUSG00000110195	Pde2a	7	101421691	101512827	101421691	1	phosphodiesterase 2A, cGMP-stimulated [Source:MGI Symbol;Acc:MGI:2446107]
ENSMUSG00000027810.14	2124.45	0.172834	0.071239	2.42611	0.0152615	0.424124	ENSMUSG00000027810.14	ENSMUSG00000027810	Eif2a	3	58525821	58557501	58525821	1	eukaryotic translation initiation factor 2A [Source:MGI Symbol;Acc:MGI:1098684]
ENSMUSG00000029165.17	196.516	-0.441928	0.182227	-2.42514	0.0153023	0.42461	ENSMUSG00000029165.17	ENSMUSG00000029165	Agbl5	5	30888694	30906965	30888694	1	ATP/GTP binding protein-like 5 [Source:MGI Symbol;Acc:MGI:2441745]
ENSMUSG00000023235.14	121.156	0.565389	0.233286	2.42359	0.015368	0.425784	ENSMUSG00000023235.14	ENSMUSG00000023235	Ccl25	8	4325210	4360020	4325210	1	chemokine (C-C motif) ligand 25 [Source:MGI Symbol;Acc:MGI:1099448]
ENSMUSG00000037736.20	5646.31	-0.187462	0.0773967	-2.42209	0.0154316	0.425931	ENSMUSG00000037736.20	ENSMUSG00000037736	Limch1	5	66745827	67057158	66745827	1	LIM and calponin homology domains 1 [Source:MGI Symbol;Acc:MGI:1924819]
ENSMUSG00000018008.8	293.358	-0.372903	0.153966	-2.42199	0.0154359	0.425931	ENSMUSG00000018008.8	ENSMUSG00000018008	Cyth4	15	78597047	78622019	78597047	1	cytohesin 4 [Source:MGI Symbol;Acc:MGI:2441702]
ENSMUSG00000029605.16	58.83	-0.764549	0.315694	-2.4218	0.0154436	0.425931	ENSMUSG00000029605.16	ENSMUSG00000029605	Oas1b	5	120812635	120824163	120812635	1	2'-5' oligoadenylate synthetase 1B [Source:MGI Symbol;Acc:MGI:97430]
ENSMUSG00000027777.15	2224.33	-0.16175	0.0668513	-2.41955	0.0155397	0.426864	ENSMUSG00000027777.15	ENSMUSG00000027777	Schip1	3	68064802	68626481	68064802	1	schwannomin interacting protein 1 [Source:MGI Symbol;Acc:MGI:1353557]
ENSMUSG00000031480.15	226.337	-0.421264	0.174121	-2.41938	0.0155472	0.426864	ENSMUSG00000031480.15	ENSMUSG00000031480	Thsd1	8	22227313	22261334	22227313	1	thrombospondin, type I, domain 1 [Source:MGI Symbol;Acc:MGI:1929096]
ENSMUSG00000030091.17	265.092	-0.370104	0.152993	-2.4191	0.0155591	0.426864	ENSMUSG00000030091.17	ENSMUSG00000030091	Nup210	6	91013068	91116829	91116829	-1	nucleoporin 210 [Source:MGI Symbol;Acc:MGI:1859555]
ENSMUSG00000041278.10	4082.48	0.137632	0.0569199	2.418	0.0156063	0.426864	ENSMUSG00000041278.10	ENSMUSG00000041278	Ttc1	11	43729512	43748008	43748008	-1	tetratricopeptide repeat domain 1 [Source:MGI Symbol;Acc:MGI:1914077]
ENSMUSG00000021494.9	633.388	-0.263524	0.109018	-2.41726	0.015638	0.426864	ENSMUSG00000021494.9	ENSMUSG00000021494	Ddx41	13	55530410	55536658	55536658	-1	DEAD (Asp-Glu-Ala-Asp) box polypeptide 41 [Source:MGI Symbol;Acc:MGI:1920185]
ENSMUSG00000072568.4	127.976	-0.497835	0.205952	-2.41723	0.0156389	0.426864	ENSMUSG00000072568.4	ENSMUSG00000072568	Lratd2	15	60818994	60853778	60825080	-1	LRAT domain containing 1 [Source:MGI Symbol;Acc:MGI:3026924]
ENSMUSG00000085586.1	636.8	0.26301	0.108835	2.4166	0.0156663	0.426864	ENSMUSG00000085586.1	ENSMUSG00000085586	Gm11613	11	97644184	97660367	97660367	-1	predicted gene 11613 [Source:MGI Symbol;Acc:MGI:3651819]
ENSMUSG00000004535.12	12464.7	0.110822	0.0458594	2.41656	0.015668	0.426864	ENSMUSG00000004535.12	ENSMUSG00000004535	Tax1bp1	6	52713729	52766780	52713729	1	Tax1 (human T cell leukemia virus type I) binding protein 1 [Source:MGI Symbol;Acc:MGI:1289308]
ENSMUSG00000089756.2	1112.88	0.198046	0.0819744	2.41594	0.0156945	0.426864	ENSMUSG00000089756.2	ENSMUSG00000089756	Zfp966	2	175918881	175931100	175931051	-1	zinc finger protein 966 [Source:MGI Symbol;Acc:MGI:3709288]
ENSMUSG00000021871.19	119.261	-0.765912	0.317078	-2.41553	0.0157124	0.426864	ENSMUSG00000021871.19	ENSMUSG00000021871	Gm49342	14	50944517	50963136	50944517	1	predicted gene, 49342 [Source:MGI Symbol;Acc:MGI:6121535]
ENSMUSG00000015291.10	30594.5	0.132305	0.054869	2.41129	0.0158964	0.431219	ENSMUSG00000015291.10	ENSMUSG00000015291	Gdi1	X	74304998	74311862	74304998	1	guanosine diphosphate (GDP) dissociation inhibitor 1 [Source:MGI Symbol;Acc:MGI:99846]
ENSMUSG00000064293.14	952.42	0.23744	0.0985152	2.41019	0.0159444	0.431876	ENSMUSG00000064293.14	ENSMUSG00000064293	Cntn4	6	105677660	106699310	105677660	1	contactin 4 [Source:MGI Symbol;Acc:MGI:1095737]
ENSMUSG00000040950.13	164.884	-0.538404	0.223479	-2.4092	0.0159877	0.431918	ENSMUSG00000040950.13	ENSMUSG00000040950	Mgl2	11	70130329	70137550	70130329	1	macrophage galactose N-acetyl-galactosamine specific lectin 2 [Source:MGI Symbol;Acc:MGI:2385729]
ENSMUSG00000036422.10	396.286	0.325077	0.134939	2.40906	0.0159935	0.431918	ENSMUSG00000036422.10	ENSMUSG00000036422	Pcdh8	14	79766775	79771312	79771312	-1	protocadherin 8 [Source:MGI Symbol;Acc:MGI:1306800]
ENSMUSG00000033880.11	3184.14	-0.176282	0.0732232	-2.40745	0.0160642	0.433101	ENSMUSG00000033880.11	ENSMUSG00000033880	Lgals3bp	11	118392751	118402092	118398151	-1	lectin, galactoside-binding, soluble, 3 binding protein [Source:MGI Symbol;Acc:MGI:99554]
ENSMUSG00000062006.12	3288.45	-0.153464	0.0637779	-2.40623	0.0161183	0.433101	ENSMUSG00000062006.12	ENSMUSG00000062006	Rpl34	3	130726831	130730398	130730337	-1	ribosomal protein L34 [Source:MGI Symbol;Acc:MGI:1915686]
ENSMUSG00000089679.1	27.8965	1.14369	0.475317	2.40616	0.0161213	0.433101	ENSMUSG00000089679.1	ENSMUSG00000089679	Gm16299	19	53819354	53825128	53825128	-1	predicted gene 16299 [Source:MGI Symbol;Acc:MGI:3826539]
ENSMUSG00000090031.2	62.0875	-0.87788	0.364886	-2.4059	0.0161325	0.433101	ENSMUSG00000090031.2	ENSMUSG00000090031	4732440D04Rik	1	6209866	6215293	6215293	-1	RIKEN cDNA 4732440D04 gene [Source:MGI Symbol;Acc:MGI:3604103]
ENSMUSG00000032468.11	3667.38	0.142572	0.0592752	2.40525	0.0161613	0.433232	ENSMUSG00000032468.11	ENSMUSG00000032468	Armc8	9	99478372	99568899	99568899	-1	armadillo repeat containing 8 [Source:MGI Symbol;Acc:MGI:1921375]
ENSMUSG00000054690.17	393.964	-0.307358	0.127911	-2.40291	0.0162653	0.435378	ENSMUSG00000054690.17	ENSMUSG00000054690	Emcn	3	137341067	137432185	137341067	1	endomucin [Source:MGI Symbol;Acc:MGI:1891716]
ENSMUSG00000040795.12	566.312	0.260238	0.108347	2.40189	0.0163107	0.435951	ENSMUSG00000040795.12	ENSMUSG00000040795	Iqcc	4	129615126	129619099	129619099	-1	IQ motif containing C [Source:MGI Symbol;Acc:MGI:2446212]
ENSMUSG00000024621.16	718.957	-0.291814	0.121534	-2.40109	0.0163463	0.436262	ENSMUSG00000024621.16	ENSMUSG00000024621	Csf1r	18	61100598	61132149	61100598	1	colony stimulating factor 1 receptor [Source:MGI Symbol;Acc:MGI:1339758]
ENSMUSG00000024357.10	1365.76	0.228986	0.0954244	2.39966	0.0164105	0.436528	ENSMUSG00000024357.10	ENSMUSG00000024357	Sil1	18	35266396	35499780	35343067	-1	endoplasmic reticulum chaperone SIL1 homolog (S. cerevisiae) [Source:MGI Symbol;Acc:MGI:1932040]
ENSMUSG00000047213.14	3612.32	0.138426	0.0576998	2.39906	0.016437	0.436528	ENSMUSG00000047213.14	ENSMUSG00000047213	Ythdf3	3	16183212	16217037	16183212	1	YTH N6-methyladenosine RNA binding protein 3 [Source:MGI Symbol;Acc:MGI:1918850]
ENSMUSG00000046718.8	391.388	-0.377066	0.157193	-2.39875	0.0164511	0.436528	ENSMUSG00000046718.8	ENSMUSG00000046718	Bst2	8	71534255	71537456	71537456	-1	bone marrow stromal cell antigen 2 [Source:MGI Symbol;Acc:MGI:1916800]
ENSMUSG00000046364.14	3159.16	-0.171918	0.0716708	-2.39872	0.0164524	0.436528	ENSMUSG00000046364.14	ENSMUSG00000046364	Rpl27a	7	109519147	109522367	109519147	1	ribosomal protein L27A [Source:MGI Symbol;Acc:MGI:1347076]
ENSMUSG00000062611.4	4.38235	-3.65644	1.52457	-2.39833	0.0164699	NA	ENSMUSG00000062611.4	ENSMUSG00000062611	Rps3a2	14	88123017	88123808	88123808	-1	ribosomal protein S3A2 [Source:MGI Symbol;Acc:MGI:3642853]
ENSMUSG00000078185.3	2002.38	0.205087	0.085526	2.39795	0.0164869	0.436807	ENSMUSG00000078185.3	ENSMUSG00000078185	Chml	1	175682237	175692901	175692630	-1	choroideremia-like [Source:MGI Symbol;Acc:MGI:101913]
ENSMUSG00000062082.16	3.23916	-4.13801	1.72664	-2.39656	0.0165496	NA	ENSMUSG00000062082.16	ENSMUSG00000062082	Cd200r4	16	44811733	44839150	44811733	1	CD200 receptor 4 [Source:MGI Symbol;Acc:MGI:3036289]
ENSMUSG00000093987.7	2.86693	-5.00549	2.0887	-2.39647	0.016554	NA	ENSMUSG00000093987.7	ENSMUSG00000093987	Gm21704	Y	3367147	3410167	3378783	-1	predicted gene, 21704 [Source:MGI Symbol;Acc:MGI:5435059]
ENSMUSG00000040649.15	588.795	-0.331652	0.138395	-2.39641	0.0165564	0.437411	ENSMUSG00000040649.15	ENSMUSG00000040649	Rimklb	6	122447296	122498761	122466587	-1	ribosomal modification protein rimK-like family member B [Source:MGI Symbol;Acc:MGI:1918325]
ENSMUSG00000025272.16	8699.64	0.146391	0.0610883	2.39638	0.0165579	0.437411	ENSMUSG00000025272.16	ENSMUSG00000025272	Tro	X	150645304	150657583	150657583	-1	trophinin [Source:MGI Symbol;Acc:MGI:1928994]
ENSMUSG00000063548.3	2.30584	4.61042	1.92638	2.3933	0.0166975	NA	ENSMUSG00000063548.3	ENSMUSG00000063548	Gm4825	15	85510812	85511219	85510812	1	predicted pseudogene 4825 [Source:MGI Symbol;Acc:MGI:3647768]
ENSMUSG00000040734.14	376.734	0.29861	0.124968	2.38949	0.016872	0.443765	ENSMUSG00000040734.14	ENSMUSG00000040734	Ppp1r13l	7	19359749	19378533	19359749	1	protein phosphatase 1, regulatory subunit 13 like [Source:MGI Symbol;Acc:MGI:3525053]
ENSMUSG00000063558.4	3352.64	-0.122435	0.051243	-2.3893	0.0168804	0.443765	ENSMUSG00000063558.4	ENSMUSG00000063558	Aox1	1	58029931	58106413	58029931	1	aldehyde oxidase 1 [Source:MGI Symbol;Acc:MGI:88035]
ENSMUSG00000020061.18	439.856	-2.79699	1.17085	-2.38885	0.0169011	0.443765	ENSMUSG00000020061.18	ENSMUSG00000020061	Mybpc1	10	88518279	88605152	88605152	-1	myosin binding protein C, slow-type [Source:MGI Symbol;Acc:MGI:1336213]
ENSMUSG00000080316.11	204.834	-0.576033	0.241169	-2.3885	0.0169172	0.443765	ENSMUSG00000080316.11	ENSMUSG00000080316	Spaca6	17	17827158	17843009	17827158	1	sperm acrosome associated 6 [Source:MGI Symbol;Acc:MGI:1922452]
ENSMUSG00000041912.12	2996.19	0.163932	0.0686441	2.38814	0.0169339	0.443765	ENSMUSG00000041912.12	ENSMUSG00000041912	Tdrkh	3	94413273	94434668	94413273	1	tudor and KH domain containing protein [Source:MGI Symbol;Acc:MGI:1919884]
ENSMUSG00000040842.17	1929.48	-0.160868	0.0673681	-2.3879	0.0169449	0.443765	ENSMUSG00000040842.17	ENSMUSG00000040842	Szrd1	4	141113001	141139775	141139727	-1	SUZ RNA binding domain containing 1 [Source:MGI Symbol;Acc:MGI:1098672]
ENSMUSG00000032580.12	3307.96	0.177305	0.0742689	2.38734	0.0169709	0.443808	ENSMUSG00000032580.12	ENSMUSG00000032580	Rbm5	9	107740371	107770996	107770996	-1	RNA binding motif protein 5 [Source:MGI Symbol;Acc:MGI:1933204]
ENSMUSG00000032939.14	4549.95	-0.214242	0.0897975	-2.38583	0.0170406	0.444436	ENSMUSG00000032939.14	ENSMUSG00000032939	Nup93	8	94214564	94317227	94214564	1	nucleoporin 93 [Source:MGI Symbol;Acc:MGI:1919055]
ENSMUSG00000036046.14	4175.35	-0.125119	0.052451	-2.38545	0.0170581	0.444436	ENSMUSG00000036046.14	ENSMUSG00000036046	5031439G07Rik	15	84943936	84988551	84988000	-1	RIKEN cDNA 5031439G07 gene [Source:MGI Symbol;Acc:MGI:2444899]
ENSMUSG00000059456.13	2124.49	0.174401	0.0731302	2.3848	0.0170885	0.444436	ENSMUSG00000059456.13	ENSMUSG00000059456	Ptk2b	14	66153257	66281052	66281052	-1	PTK2 protein tyrosine kinase 2 beta [Source:MGI Symbol;Acc:MGI:104908]
ENSMUSG00000022749.8	1540.96	0.177133	0.0742787	2.38471	0.0170927	0.444436	ENSMUSG00000022749.8	ENSMUSG00000022749	Tbc1d23	16	57168862	57231504	57231504	-1	TBC1 domain family, member 23 [Source:MGI Symbol;Acc:MGI:1914831]
ENSMUSG00000073077.7	33.9789	1.8505	0.776282	2.3838	0.0171349	0.444896	ENSMUSG00000073077.7	ENSMUSG00000073077	Cfap47	X	79266559	79517285	79517285	-1	cilia and flagella associated protein 47 [Source:MGI Symbol;Acc:MGI:3781475]
ENSMUSG00000038811.13	25.6143	-1.13912	0.478009	-2.38305	0.0171698	0.445167	ENSMUSG00000038811.13	ENSMUSG00000038811	Gngt2	11	95837216	95845734	95837216	1	guanine nucleotide binding protein (G protein), gamma transducing activity polypeptide 2 [Source:MGI Symbol;Acc:MGI:893584]
ENSMUSG00000032624.16	1580.1	0.17157	0.0720347	2.38177	0.0172296	0.445402	ENSMUSG00000032624.16	ENSMUSG00000032624	Eml4	17	83350931	83480361	83350931	1	echinoderm microtubule associated protein like 4 [Source:MGI Symbol;Acc:MGI:1926048]
ENSMUSG00000032299.10	1301.96	-0.172637	0.0725028	-2.38111	0.0172605	0.445402	ENSMUSG00000032299.10	ENSMUSG00000032299	Commd4	9	57155035	57158331	57158277	-1	COMM domain containing 4 [Source:MGI Symbol;Acc:MGI:1913449]
ENSMUSG00000021221.15	384.783	0.313232	0.131558	2.38094	0.0172684	0.445402	ENSMUSG00000021221.15	ENSMUSG00000021221	Dpf3	12	83213745	83487716	83350895	-1	D4, zinc and double PHD fingers, family 3 [Source:MGI Symbol;Acc:MGI:1917377]
ENSMUSG00000032604.16	2640.31	0.14053	0.0590275	2.38076	0.017277	0.445402	ENSMUSG00000032604.16	ENSMUSG00000032604	Qars	9	108507706	108515941	108507706	1	glutaminyl-tRNA synthetase [Source:MGI Symbol;Acc:MGI:1915851]
ENSMUSG00000021772.15	5337.86	0.124925	0.0524847	2.38022	0.0173023	0.445423	ENSMUSG00000021772.15	ENSMUSG00000021772	Nkiras1	14	18271136	18284003	18271136	1	NFKB inhibitor interacting Ras-like protein 1 [Source:MGI Symbol;Acc:MGI:1916971]
ENSMUSG00000032883.15	3665.26	0.138739	0.058308	2.37941	0.0173406	0.445553	ENSMUSG00000032883.15	ENSMUSG00000032883	Acsl3	1	78657825	78707743	78657825	1	acyl-CoA synthetase long-chain family member 3 [Source:MGI Symbol;Acc:MGI:1921455]
ENSMUSG00000031353.13	5772.17	0.117405	0.0493491	2.37907	0.0173563	0.445553	ENSMUSG00000031353.13	ENSMUSG00000031353	Rbbp7	X	162760402	162779092	162760402	1	retinoblastoma binding protein 7, chromatin remodeling factor [Source:MGI Symbol;Acc:MGI:1194910]
ENSMUSG00000028936.15	4782.69	-0.114863	0.0483155	-2.37734	0.0174378	0.446518	ENSMUSG00000028936.15	ENSMUSG00000028936	Rpl22	4	152325742	152334071	152325742	1	ribosomal protein L22 [Source:MGI Symbol;Acc:MGI:99262]
ENSMUSG00000036282.15	1865.71	0.223822	0.0941878	2.37634	0.0174853	0.446518	ENSMUSG00000036282.15	ENSMUSG00000036282	Naa30	14	49172226	49191031	49172226	1	N(alpha)-acetyltransferase 30, NatC catalytic subunit [Source:MGI Symbol;Acc:MGI:1922259]
ENSMUSG00000059824.12	703.711	0.31529	0.132687	2.37619	0.0174926	0.446518	ENSMUSG00000059824.12	ENSMUSG00000059824	Dbp	7	45705088	45710203	45705088	1	D site albumin promoter binding protein [Source:MGI Symbol;Acc:MGI:94866]
ENSMUSG00000036960.10	49.7043	0.871297	0.366755	2.3757	0.0175159	0.446518	ENSMUSG00000036960.10	ENSMUSG00000036960	Clca2	3	145070263	145099443	145099104	-1	chloride channel accessory 2 [Source:MGI Symbol;Acc:MGI:2139758]
ENSMUSG00000049939.6	747.028	0.244161	0.102775	2.37568	0.0175168	0.446518	ENSMUSG00000049939.6	ENSMUSG00000049939	Lrrc4	6	28661831	28831747	28830345	-1	leucine rich repeat containing 4 [Source:MGI Symbol;Acc:MGI:2182081]
ENSMUSG00000020839.16	29.2981	-1.0958	0.461532	-2.37427	0.0175837	0.447595	ENSMUSG00000020839.16	ENSMUSG00000020839	Tmigd1	11	76902159	76916587	76902159	1	transmembrane and immunoglobulin domain containing 1 [Source:MGI Symbol;Acc:MGI:1913851]
ENSMUSG00000022180.7	1721.14	0.171937	0.0724772	2.37229	0.0176783	0.44848	ENSMUSG00000022180.7	ENSMUSG00000022180	Slc7a8	14	54722209	54781946	54781930	-1	solute carrier family 7 (cationic amino acid transporter, y+ system), member 8 [Source:MGI Symbol;Acc:MGI:1355323]
ENSMUSG00000064356.3	12226.1	-0.416404	0.175555	-2.37193	0.0176955	0.44848	ENSMUSG00000064356.3	ENSMUSG00000064356	mt-Atp8	MT	7766	7969	7766	1	mitochondrially encoded ATP synthase 8 [Source:MGI Symbol;Acc:MGI:99926]
ENSMUSG00000020482.4	869.094	0.231968	0.0978045	2.37175	0.017704	0.44848	ENSMUSG00000020482.4	ENSMUSG00000020482	Ccdc117	11	5528887	5542187	5542187	-1	coiled-coil domain containing 117 [Source:MGI Symbol;Acc:MGI:2144383]
ENSMUSG00000034098.14	1823.09	0.230774	0.0973211	2.37127	0.0177272	0.44848	ENSMUSG00000034098.14	ENSMUSG00000034098	Fstl5	3	76074270	76710019	76074270	1	follistatin-like 5 [Source:MGI Symbol;Acc:MGI:2442179]
ENSMUSG00000021794.16	12349.2	0.0975677	0.0411573	2.3706	0.017759	0.44848	ENSMUSG00000021794.16	ENSMUSG00000021794	Glud1	14	34310727	34345265	34310727	1	glutamate dehydrogenase 1 [Source:MGI Symbol;Acc:MGI:95753]
ENSMUSG00000039114.16	19102.9	-0.102326	0.0431845	-2.36952	0.0178114	0.44848	ENSMUSG00000039114.16	ENSMUSG00000039114	Nrn1	13	36725361	36735131	36730680	-1	neuritin 1 [Source:MGI Symbol;Acc:MGI:1915654]
ENSMUSG00000008301.11	1437.09	-0.207958	0.0877905	-2.3688	0.017846	0.44848	ENSMUSG00000008301.11	ENSMUSG00000008301	Phax	18	56562443	56587712	56562443	1	phosphorylated adaptor for RNA export [Source:MGI Symbol;Acc:MGI:1891839]
ENSMUSG00000057236.10	4428.77	0.141311	0.059657	2.36873	0.0178492	0.44848	ENSMUSG00000057236.10	ENSMUSG00000057236	Rbbp4	4	129307100	129335370	129335370	-1	retinoblastoma binding protein 4, chromatin remodeling factor [Source:MGI Symbol;Acc:MGI:1194912]
ENSMUSG00000020323.14	11.2318	-1.83717	0.775642	-2.36858	0.0178567	0.44848	ENSMUSG00000020323.14	ENSMUSG00000020323	Prss57	10	79781474	79790961	79790961	-1	protease, serine 57 [Source:MGI Symbol;Acc:MGI:1920356]
ENSMUSG00000057895.11	206.493	0.394752	0.166694	2.36812	0.0178787	0.44848	ENSMUSG00000057895.11	ENSMUSG00000057895	Zfp105	9	122923072	122931028	122923072	1	zinc finger protein 105 [Source:MGI Symbol;Acc:MGI:1277119]
ENSMUSG00000079523.8	22468.8	-0.117274	0.04953	-2.36773	0.0178975	0.44848	ENSMUSG00000079523.8	ENSMUSG00000079523	Tmsb10	6	72957347	72958748	72958488	-1	thymosin, beta 10 [Source:MGI Symbol;Acc:MGI:109146]
ENSMUSG00000069892.9	140.974	-0.564014	0.238295	-2.36687	0.0179391	0.44848	ENSMUSG00000069892.9	ENSMUSG00000069892	9930111J21Rik2	11	49015874	49051242	49051225	-1	RIKEN cDNA 9930111J21 gene 2 [Source:MGI Symbol;Acc:MGI:3711310]
ENSMUSG00000034473.14	647.944	0.278801	0.117793	2.36687	0.0179392	0.44848	ENSMUSG00000034473.14	ENSMUSG00000034473	Sec22a	16	35311131	35363918	35363918	-1	SEC22 homolog A, vesicle trafficking protein [Source:MGI Symbol;Acc:MGI:2447876]
ENSMUSG00000049439.13	774.236	0.219803	0.0929081	2.36581	0.0179908	0.449153	ENSMUSG00000049439.13	ENSMUSG00000049439	Cyp20a1	1	60343323	60388060	60343323	1	cytochrome P450, family 20, subfamily a, polypeptide 1 [Source:MGI Symbol;Acc:MGI:1925201]
ENSMUSG00000112478.1	28.5679	-1.04823	0.443752	-2.36219	0.0181673	0.452538	ENSMUSG00000112478.1	ENSMUSG00000112478	Gm47761	10	17318085	17323228	17323228	-1	predicted gene, 47761 [Source:MGI Symbol;Acc:MGI:6096912]
ENSMUSG00000023039.17	13.3591	-1.74241	0.737683	-2.36201	0.0181762	0.452538	ENSMUSG00000023039.17	ENSMUSG00000023039	Krt7	15	101411043	101430313	101411043	1	keratin 7 [Source:MGI Symbol;Acc:MGI:96704]
ENSMUSG00000118168.1	4.68936	-3.06565	1.29816	-2.36153	0.0181997	NA	ENSMUSG00000118168.1	ENSMUSG00000118168	Gm36419	19	32543348	32563611	32543348	1	predicted gene, 36419 [Source:MGI Symbol;Acc:MGI:5595578]
ENSMUSG00000026478.14	4026.65	-0.16859	0.0714117	-2.36082	0.0182346	0.45337	ENSMUSG00000026478.14	ENSMUSG00000026478	Lamc1	1	153218922	153332786	153332786	-1	laminin, gamma 1 [Source:MGI Symbol;Acc:MGI:99914]
ENSMUSG00000059323.14	492.225	0.344771	0.14623	2.35774	0.0183865	0.455682	ENSMUSG00000059323.14	ENSMUSG00000059323	Tonsl	15	76626002	76639958	76629299	-1	tonsoku-like, DNA repair protein [Source:MGI Symbol;Acc:MGI:1919999]
ENSMUSG00000002020.15	182.304	-0.58235	0.247051	-2.3572	0.0184132	0.455682	ENSMUSG00000002020.15	ENSMUSG00000002020	Ltbp2	12	84783212	84876532	84876532	-1	latent transforming growth factor beta binding protein 2 [Source:MGI Symbol;Acc:MGI:99502]
ENSMUSG00000062257.13	4916.86	0.171963	0.0729669	2.35673	0.0184367	0.455682	ENSMUSG00000062257.13	ENSMUSG00000062257	Opcml	9	27790775	28925410	27790775	1	opioid binding protein/cell adhesion molecule-like [Source:MGI Symbol;Acc:MGI:97397]
ENSMUSG00000030701.17	6804.34	-0.184641	0.0783518	-2.35656	0.018445	0.455682	ENSMUSG00000030701.17	ENSMUSG00000030701	Plekhb1	7	100642892	100662414	100656953	-1	pleckstrin homology domain containing, family B (evectins) member 1 [Source:MGI Symbol;Acc:MGI:1351469]
ENSMUSG00000019888.16	166.601	0.490977	0.208359	2.3564	0.0184529	0.455682	ENSMUSG00000019888.16	ENSMUSG00000019888	Mgat4c	10	101681487	102391469	101681487	1	MGAT4 family, member C [Source:MGI Symbol;Acc:MGI:1914819]
ENSMUSG00000030834.7	13.187	-1.74771	0.74208	-2.35515	0.0185153	0.456471	ENSMUSG00000030834.7	ENSMUSG00000030834	Abcc6	7	45967555	46030302	45980006	-1	ATP-binding cassette, sub-family C (CFTR/MRP), member 6 [Source:MGI Symbol;Acc:MGI:1351634]
ENSMUSG00000027639.16	1816.98	-0.176387	0.0749067	-2.35475	0.0185351	0.456471	ENSMUSG00000027639.16	ENSMUSG00000027639	Samhd1	2	157097533	157135265	157135265	-1	SAM domain and HD domain, 1 [Source:MGI Symbol;Acc:MGI:1927468]
ENSMUSG00000006281.8	1770.12	-0.25693	0.109167	-2.35354	0.0185957	0.457345	ENSMUSG00000006281.8	ENSMUSG00000006281	Tep1	14	50824059	50870560	50870560	-1	telomerase associated protein 1 [Source:MGI Symbol;Acc:MGI:109573]
ENSMUSG00000032579.14	325.778	-0.552956	0.235045	-2.35256	0.0186447	0.45793	ENSMUSG00000032579.14	ENSMUSG00000032579	Hemk1	9	107327084	107338350	107338350	-1	HemK methyltransferase family member 1 [Source:MGI Symbol;Acc:MGI:1916786]
ENSMUSG00000104763.1	2.23238	4.5693	1.94293	2.35176	0.0186848	NA	ENSMUSG00000104763.1	ENSMUSG00000104763	9830132P13Rik	3	127916172	127955220	127916172	1	RIKEN cDNA 9830132P13 gene [Source:MGI Symbol;Acc:MGI:5439414]
ENSMUSG00000043923.8	186.588	-0.498132	0.211822	-2.35166	0.01869	0.458073	ENSMUSG00000043923.8	ENSMUSG00000043923	Ccdc84	9	44410159	44418569	44418569	-1	coiled-coil domain containing 84 [Source:MGI Symbol;Acc:MGI:2685960]
ENSMUSG00000032942.14	69.2714	-1.24585	0.529823	-2.35144	0.018701	0.458073	ENSMUSG00000032942.14	ENSMUSG00000032942	Ucp3	7	100472990	100486432	100472990	1	uncoupling protein 3 (mitochondrial, proton carrier) [Source:MGI Symbol;Acc:MGI:1099787]
ENSMUSG00000020524.16	1140.89	0.181586	0.0772979	2.34917	0.0188154	0.459539	ENSMUSG00000020524.16	ENSMUSG00000020524	Gria1	11	57011387	57330244	57011387	1	glutamate receptor, ionotropic, AMPA1 (alpha 1) [Source:MGI Symbol;Acc:MGI:95808]
ENSMUSG00000037872.5	3731.52	0.120432	0.0512697	2.349	0.0188239	0.459539	ENSMUSG00000037872.5	ENSMUSG00000037872	Ackr1	1	173331886	173333750	173333750	-1	atypical chemokine receptor 1 (Duffy blood group) [Source:MGI Symbol;Acc:MGI:1097689]
ENSMUSG00000038860.15	4303.74	0.113282	0.0482307	2.34875	0.0188367	0.459539	ENSMUSG00000038860.15	ENSMUSG00000038860	Garnl3	2	32986224	33131654	33087253	-1	GTPase activating RANGAP domain-like 3 [Source:MGI Symbol;Acc:MGI:2139309]
ENSMUSG00000021982.14	2465.14	0.15762	0.0671436	2.34751	0.0188995	0.460031	ENSMUSG00000021982.14	ENSMUSG00000021982	Cdadc1	14	59559388	59597959	59597939	-1	cytidine and dCMP deaminase domain containing 1 [Source:MGI Symbol;Acc:MGI:1919141]
ENSMUSG00000063787.4	682.99	-0.221835	0.0945045	-2.34735	0.0189074	0.460031	ENSMUSG00000063787.4	ENSMUSG00000063787	Chchd1	14	20703006	20704425	20703006	1	coiled-coil-helix-coiled-coil-helix domain containing 1 [Source:MGI Symbol;Acc:MGI:1913371]
ENSMUSG00000020720.13	5407.06	0.118751	0.0506425	2.34489	0.0190329	0.461053	ENSMUSG00000020720.13	ENSMUSG00000020720	Psmd12	11	107479484	107504362	107479484	1	proteasome (prosome, macropain) 26S subunit, non-ATPase, 12 [Source:MGI Symbol;Acc:MGI:1914247]
ENSMUSG00000029093.14	1054.74	-0.226461	0.0965836	-2.34472	0.0190415	0.461053	ENSMUSG00000029093.14	ENSMUSG00000029093	Sorcs2	5	36017180	36398139	36398124	-1	sortilin-related VPS10 domain containing receptor 2 [Source:MGI Symbol;Acc:MGI:1932289]
ENSMUSG00000031731.16	6754.82	0.122014	0.0520454	2.34437	0.0190592	0.461053	ENSMUSG00000031731.16	ENSMUSG00000031731	Ap1g1	8	109778554	109864204	109778554	1	adaptor protein complex AP-1, gamma 1 subunit [Source:MGI Symbol;Acc:MGI:101919]
ENSMUSG00000029417.9	34.8548	-1.33745	0.570563	-2.34408	0.019074	0.461053	ENSMUSG00000029417.9	ENSMUSG00000029417	Cxcl9	5	92321347	92328079	92328079	-1	chemokine (C-X-C motif) ligand 9 [Source:MGI Symbol;Acc:MGI:1352449]
ENSMUSG00000037509.21	5083.72	0.11604	0.0495044	2.34404	0.0190763	0.461053	ENSMUSG00000037509.21	ENSMUSG00000037509	Arhgef4	1	34678188	34813309	34678188	1	Rho guanine nucleotide exchange factor (GEF) 4 [Source:MGI Symbol;Acc:MGI:2442507]
ENSMUSG00000042766.17	2704.76	-0.126161	0.0538635	-2.34224	0.0191683	0.46236	ENSMUSG00000042766.17	ENSMUSG00000042766	Trim46	3	89234177	89246309	89245013	-1	tripartite motif-containing 46 [Source:MGI Symbol;Acc:MGI:2673000]
ENSMUSG00000020211.15	1480.7	0.199224	0.0850887	2.34137	0.019213	0.46236	ENSMUSG00000020211.15	ENSMUSG00000020211	Sf3a2	10	80798198	80804924	80798198	1	splicing factor 3a, subunit 2 [Source:MGI Symbol;Acc:MGI:104912]
ENSMUSG00000056832.14	281.694	-0.389609	0.166424	-2.34106	0.0192289	0.46236	ENSMUSG00000056832.14	ENSMUSG00000056832	Ttc26	6	38381469	38427647	38381469	1	tetratricopeptide repeat domain 26 [Source:MGI Symbol;Acc:MGI:2444853]
ENSMUSG00000007480.5	10.7576	-1.801	0.769441	-2.34066	0.0192496	0.46236	ENSMUSG00000007480.5	ENSMUSG00000007480	Mc5r	18	68337596	68342446	68337596	1	melanocortin 5 receptor [Source:MGI Symbol;Acc:MGI:99420]
ENSMUSG00000020328.10	398.904	0.335395	0.1433	2.34051	0.0192576	0.46236	ENSMUSG00000020328.10	ENSMUSG00000020328	Nudcd2	11	40733667	40740046	40733667	1	NudC domain containing 2 [Source:MGI Symbol;Acc:MGI:1277103]
ENSMUSG00000032193.9	12215.8	0.101351	0.0433243	2.33935	0.0193173	0.463183	ENSMUSG00000032193.9	ENSMUSG00000032193	Ldlr	9	21723483	21749919	21723483	1	low density lipoprotein receptor [Source:MGI Symbol;Acc:MGI:96765]
ENSMUSG00000030747.5	918.424	0.198128	0.0847186	2.33866	0.019353	0.463427	ENSMUSG00000030747.5	ENSMUSG00000030747	Dgat2	7	99153658	99182719	99182719	-1	diacylglycerol O-acyltransferase 2 [Source:MGI Symbol;Acc:MGI:1915050]
ENSMUSG00000052374.16	212.567	-2.32193	0.99317	-2.3379	0.0193924	0.463759	ENSMUSG00000052374.16	ENSMUSG00000052374	Actn2	13	12269426	12340760	12340760	-1	actinin alpha 2 [Source:MGI Symbol;Acc:MGI:109192]
ENSMUSG00000066043.13	602.94	0.257867	0.11034	2.33702	0.0194382	0.464243	ENSMUSG00000066043.13	ENSMUSG00000066043	Phactr4	4	132355923	132422489	132422489	-1	phosphatase and actin regulator 4 [Source:MGI Symbol;Acc:MGI:2140327]
ENSMUSG00000019818.15	15355.6	0.111617	0.0477759	2.33627	0.0194773	0.464568	ENSMUSG00000019818.15	ENSMUSG00000019818	Cd164	10	41519414	41531048	41519414	1	CD164 antigen [Source:MGI Symbol;Acc:MGI:1859568]
ENSMUSG00000032548.14	430.236	-0.306826	0.131387	-2.33528	0.019529	0.464746	ENSMUSG00000032548.14	ENSMUSG00000032548	Slco2a1	9	102988712	103096002	102988712	1	solute carrier organic anion transporter family, member 2a1 [Source:MGI Symbol;Acc:MGI:1346021]
ENSMUSG00000090222.2	12.9208	-1.54072	0.659894	-2.3348	0.0195539	0.464746	ENSMUSG00000090222.2	ENSMUSG00000090222	Ifi203-ps	1	173776529	173798270	173798270	-1	interferon activated gene 203, pseudogene [Source:MGI Symbol;Acc:MGI:3840117]
ENSMUSG00000040459.11	2654.48	-0.155204	0.0664827	-2.3345	0.0195697	0.464746	ENSMUSG00000040459.11	ENSMUSG00000040459	Arglu1	8	8665075	8690521	8690521	-1	arginine and glutamate rich 1 [Source:MGI Symbol;Acc:MGI:2442985]
ENSMUSG00000070644.13	59.1824	0.717392	0.307386	2.33385	0.0196038	0.464746	ENSMUSG00000070644.13	ENSMUSG00000070644	Etnk2	1	133363572	133380336	133363572	1	ethanolamine kinase 2 [Source:MGI Symbol;Acc:MGI:2443760]
ENSMUSG00000048616.4	358.316	0.312961	0.134112	2.33358	0.0196179	0.464746	ENSMUSG00000048616.4	ENSMUSG00000048616	Nog	11	89300638	89302332	89302332	-1	noggin [Source:MGI Symbol;Acc:MGI:104327]
ENSMUSG00000058624.13	3296.35	0.185855	0.0796572	2.33319	0.0196382	0.464746	ENSMUSG00000058624.13	ENSMUSG00000058624	Gda	19	21391307	21473445	21472672	-1	guanine deaminase [Source:MGI Symbol;Acc:MGI:95678]
ENSMUSG00000008683.16	3518.56	-0.147872	0.0634125	-2.33191	0.0197055	0.464953	ENSMUSG00000008683.16	ENSMUSG00000008683	Rps15a	7	118104372	118116188	118116188	-1	ribosomal protein S15A [Source:MGI Symbol;Acc:MGI:2389091]
ENSMUSG00000066232.4	5713.26	0.107676	0.0461822	2.33155	0.0197244	0.464953	ENSMUSG00000066232.4	ENSMUSG00000066232	Ipo7	7	110018274	110056609	110018274	1	importin 7 [Source:MGI Symbol;Acc:MGI:2152414]
ENSMUSG00000030323.13	3588.17	0.136133	0.0583966	2.33117	0.0197442	0.464953	ENSMUSG00000030323.13	ENSMUSG00000030323	Ift122	6	115853470	115926699	115853470	1	intraflagellar transport 122 [Source:MGI Symbol;Acc:MGI:1932386]
ENSMUSG00000023008.18	515.977	-0.297399	0.127627	-2.33023	0.0197941	0.464953	ENSMUSG00000023008.18	ENSMUSG00000023008	Fmnl3	15	99317225	99370482	99370449	-1	formin-like 3 [Source:MGI Symbol;Acc:MGI:109569]
ENSMUSG00000061740.8	723.788	-0.298105	0.12794	-2.33004	0.0198038	0.464953	ENSMUSG00000061740.8	ENSMUSG00000061740	Cyp2d22	15	82370527	82380260	82380257	-1	cytochrome P450, family 2, subfamily d, polypeptide 22 [Source:MGI Symbol;Acc:MGI:1929474]
ENSMUSG00000021548.10	1123.93	0.188505	0.0809032	2.33001	0.0198057	0.464953	ENSMUSG00000021548.10	ENSMUSG00000021548	Ccnh	13	85189408	85223469	85189408	1	cyclin H [Source:MGI Symbol;Acc:MGI:1913921]
ENSMUSG00000021411.16	387.494	0.40607	0.174307	2.32962	0.0198261	0.464953	ENSMUSG00000021411.16	ENSMUSG00000021411	Pxdc1	13	34627834	34653486	34653486	-1	PX domain containing 1 [Source:MGI Symbol;Acc:MGI:1914145]
ENSMUSG00000025393.12	61827.6	0.111415	0.0478475	2.32855	0.0198828	0.465156	ENSMUSG00000025393.12	ENSMUSG00000025393	Atp5b	10	128083273	128090391	128083273	1	ATP synthase, H+ transporting mitochondrial F1 complex, beta subunit [Source:MGI Symbol;Acc:MGI:107801]
ENSMUSG00000029817.11	2088.48	0.160147	0.0687798	2.32841	0.0198904	0.465156	ENSMUSG00000029817.11	ENSMUSG00000029817	Tra2a	6	49243924	49264033	49264010	-1	transformer 2 alpha [Source:MGI Symbol;Acc:MGI:1933972]
ENSMUSG00000000031.16	1736.26	-1.1898	0.51108	-2.32801	0.0199115	0.465156	ENSMUSG00000000031.16	ENSMUSG00000000031	H19	7	142575529	142578143	142578143	-1	H19, imprinted maternally expressed transcript [Source:MGI Symbol;Acc:MGI:95891]
ENSMUSG00000019960.8	877.241	0.225425	0.096857	2.3274	0.019944	0.465318	ENSMUSG00000019960.8	ENSMUSG00000019960	Dusp6	10	99263231	99267489	99263231	1	dual specificity phosphatase 6 [Source:MGI Symbol;Acc:MGI:1914853]
ENSMUSG00000030469.10	656.302	0.239285	0.102872	2.32605	0.0200161	0.466401	ENSMUSG00000030469.10	ENSMUSG00000030469	Zfp719	7	43579610	43593235	43579610	1	zinc finger protein 719 [Source:MGI Symbol;Acc:MGI:2444708]
ENSMUSG00000037408.10	1213.7	0.181716	0.0781624	2.32485	0.02008	0.46642	ENSMUSG00000037408.10	ENSMUSG00000037408	Cnnm4	1	36471620	36508764	36471620	1	cyclin M4 [Source:MGI Symbol;Acc:MGI:2151060]
ENSMUSG00000079003.3	838.151	-0.229609	0.0987783	-2.32449	0.0200994	0.46642	ENSMUSG00000079003.3	ENSMUSG00000079003	Samd1	8	83997501	84000409	83997501	1	sterile alpha motif domain containing 1 [Source:MGI Symbol;Acc:MGI:2142433]
ENSMUSG00000031760.9	7665.67	-0.131027	0.056371	-2.32437	0.0201055	0.46642	ENSMUSG00000031760.9	ENSMUSG00000031760	Mt3	8	94152607	94154146	94152607	1	metallothionein 3 [Source:MGI Symbol;Acc:MGI:97173]
ENSMUSG00000007833.15	573.727	0.336927	0.14497	2.32411	0.0201196	0.46642	ENSMUSG00000007833.15	ENSMUSG00000007833	Aldh16a1	7	45140684	45154584	45154526	-1	aldehyde dehydrogenase 16 family, member A1 [Source:MGI Symbol;Acc:MGI:1916998]
ENSMUSG00000025885.18	231.626	0.384584	0.165557	2.32297	0.020181	0.466436	ENSMUSG00000025885.18	ENSMUSG00000025885	Myo5b	18	74440936	74771493	74440936	1	myosin VB [Source:MGI Symbol;Acc:MGI:106598]
ENSMUSG00000114456.1	17.9263	-1.30379	0.561292	-2.32284	0.0201876	0.466436	ENSMUSG00000114456.1	ENSMUSG00000114456	H2bc9	13	23541714	23543392	23543392	-1	H2B clustered histone 9 [Source:MGI Symbol;Acc:MGI:2448387]
ENSMUSG00000063646.18	5513.02	0.128225	0.055206	2.32266	0.0201972	0.466436	ENSMUSG00000063646.18	ENSMUSG00000063646	Jakmip1	5	37028335	37150607	37028335	1	janus kinase and microtubule interacting protein 1 [Source:MGI Symbol;Acc:MGI:1923321]
ENSMUSG00000018593.13	41684.9	-0.128186	0.0552533	-2.31997	0.0203427	0.468268	ENSMUSG00000018593.13	ENSMUSG00000018593	Sparc	11	55394500	55423183	55419898	-1	secreted acidic cysteine rich glycoprotein [Source:MGI Symbol;Acc:MGI:98373]
ENSMUSG00000066058.11	4021.44	0.173535	0.0748052	2.31983	0.0203502	0.468268	ENSMUSG00000066058.11	ENSMUSG00000066058	Cldn19	4	119255414	119262438	119255414	1	claudin 19 [Source:MGI Symbol;Acc:MGI:3033992]
ENSMUSG00000037370.13	918.379	-0.238332	0.10274	-2.31976	0.0203539	0.468268	ENSMUSG00000037370.13	ENSMUSG00000037370	Enpp1	10	24637914	24712159	24712158	-1	ectonucleotide pyrophosphatase/phosphodiesterase 1 [Source:MGI Symbol;Acc:MGI:97370]
ENSMUSG00000046532.8	1887.29	0.206042	0.088878	2.31826	0.0204352	0.469545	ENSMUSG00000046532.8	ENSMUSG00000046532	Ar	X	98148769	98323215	98148769	1	androgen receptor [Source:MGI Symbol;Acc:MGI:88064]
ENSMUSG00000078713.8	1494.19	-0.196574	0.0849347	-2.31441	0.0206451	0.473459	ENSMUSG00000078713.8	ENSMUSG00000078713	Tomm5	4	45105208	45108114	45108114	-1	translocase of outer mitochondrial membrane 5 [Source:MGI Symbol;Acc:MGI:1915762]
ENSMUSG00000018995.12	660.531	0.295842	0.127847	2.31402	0.0206665	0.473459	ENSMUSG00000018995.12	ENSMUSG00000018995	Nars2	7	96951505	97064758	96951505	1	asparaginyl-tRNA synthetase 2 (mitochondrial)(putative) [Source:MGI Symbol;Acc:MGI:2142075]
ENSMUSG00000040631.8	19633.4	0.0965398	0.0417251	2.31371	0.0206837	0.473459	ENSMUSG00000040631.8	ENSMUSG00000040631	Dok4	8	94863828	94876330	94871204	-1	docking protein 4 [Source:MGI Symbol;Acc:MGI:2148865]
ENSMUSG00000068580.11	1252.93	0.187561	0.0811337	2.31176	0.0207911	0.474834	ENSMUSG00000068580.11	ENSMUSG00000068580	Zfyve19	2	119208617	119217049	119208617	1	zinc finger, FYVE domain containing 19 [Source:MGI Symbol;Acc:MGI:1919258]
ENSMUSG00000041075.8	703.576	-0.240846	0.104187	-2.31167	0.020796	0.474834	ENSMUSG00000041075.8	ENSMUSG00000041075	Fzd7	1	59482424	59486955	59482424	1	frizzled class receptor 7 [Source:MGI Symbol;Acc:MGI:108570]
ENSMUSG00000038126.17	560.787	0.246701	0.106768	2.31062	0.020854	0.475473	ENSMUSG00000038126.17	ENSMUSG00000038126	Mphosph9	5	124250959	124327972	124327972	-1	M-phase phosphoprotein 9 [Source:MGI Symbol;Acc:MGI:2443138]
ENSMUSG00000019916.14	2477.2	-0.151191	0.0654478	-2.3101	0.0208826	0.475473	ENSMUSG00000019916.14	ENSMUSG00000019916	P4ha1	10	59323296	59373304	59323296	1	procollagen-proline, 2-oxoglutarate 4-dioxygenase (proline 4-hydroxylase), alpha 1 polypeptide [Source:MGI Symbol;Acc:MGI:97463]
ENSMUSG00000029086.15	620.394	-0.322979	0.139883	-2.30892	0.0209479	0.475473	ENSMUSG00000029086.15	ENSMUSG00000029086	Prom1	5	43993620	44102032	44101954	-1	prominin 1 [Source:MGI Symbol;Acc:MGI:1100886]
ENSMUSG00000022217.14	2522.25	0.145791	0.0631566	2.3084	0.0209768	0.475473	ENSMUSG00000022217.14	ENSMUSG00000022217	Emc9	14	55581516	55585302	55584946	-1	ER membrane protein complex subunit 9 [Source:MGI Symbol;Acc:MGI:1934682]
ENSMUSG00000041143.16	300.138	-0.334591	0.144947	-2.30836	0.0209789	0.475473	ENSMUSG00000041143.16	ENSMUSG00000041143	Tmco4	4	138972888	139059171	138972892	1	transmembrane and coiled-coil domains 4 [Source:MGI Symbol;Acc:MGI:1924306]
ENSMUSG00000042616.8	1240.13	0.169234	0.0733144	2.30833	0.020981	0.475473	ENSMUSG00000042616.8	ENSMUSG00000042616	Oscp1	4	126058565	126092195	126058565	1	organic solute carrier partner 1 [Source:MGI Symbol;Acc:MGI:1916308]
ENSMUSG00000022962.15	2472.84	0.130626	0.0566258	2.30683	0.0210645	0.476637	ENSMUSG00000022962.15	ENSMUSG00000022962	Gart	16	91621186	91646952	91646952	-1	phosphoribosylglycinamide formyltransferase [Source:MGI Symbol;Acc:MGI:95654]
ENSMUSG00000068697.7	390.304	-2.74811	1.19148	-2.30646	0.0210848	0.476637	ENSMUSG00000068697.7	ENSMUSG00000068697	Myoz1	14	20649107	20656540	20656540	-1	myozenin 1 [Source:MGI Symbol;Acc:MGI:1929471]
ENSMUSG00000022779.16	1198.45	0.204036	0.0885168	2.30505	0.0211636	0.476837	ENSMUSG00000022779.16	ENSMUSG00000022779	Top3b	16	16870736	16892990	16870736	1	topoisomerase (DNA) III beta [Source:MGI Symbol;Acc:MGI:1333803]
ENSMUSG00000057880.12	3555.65	-0.129673	0.056261	-2.30485	0.0211751	0.476837	ENSMUSG00000057880.12	ENSMUSG00000057880	Abat	16	8513429	8621568	8513429	1	4-aminobutyrate aminotransferase [Source:MGI Symbol;Acc:MGI:2443582]
ENSMUSG00000025586.17	10691.4	0.0893107	0.0387523	2.30465	0.0211859	0.476837	ENSMUSG00000025586.17	ENSMUSG00000025586	Cpeb1	7	81347026	81455465	81454758	-1	cytoplasmic polyadenylation element binding protein 1 [Source:MGI Symbol;Acc:MGI:108442]
ENSMUSG00000046480.6	24585.7	0.136549	0.0592551	2.30443	0.0211986	0.476837	ENSMUSG00000046480.6	ENSMUSG00000046480	Scn4b	9	45138395	45154152	45138395	1	sodium channel, type IV, beta [Source:MGI Symbol;Acc:MGI:2687406]
ENSMUSG00000055978.5	15.2426	-1.40407	0.609452	-2.30382	0.0212327	0.477014	ENSMUSG00000055978.5	ENSMUSG00000055978	Fut2	7	45648591	45666394	45666394	-1	fucosyltransferase 2 [Source:MGI Symbol;Acc:MGI:109374]
ENSMUSG00000086111.1	9.79767	-1.84236	0.800305	-2.30207	0.0213312	0.477736	ENSMUSG00000086111.1	ENSMUSG00000086111	Gm15326	13	111867936	111874730	111867936	1	predicted gene 15326 [Source:MGI Symbol;Acc:MGI:3705205]
ENSMUSG00000068744.12	31.6003	-1.24633	0.541467	-2.30176	0.0213489	0.477736	ENSMUSG00000068744.12	ENSMUSG00000068744	Psrc1	3	108383839	108388231	108383839	1	proline/serine-rich coiled-coil 1 [Source:MGI Symbol;Acc:MGI:1913099]
ENSMUSG00000030108.14	291.018	-0.342641	0.148893	-2.30125	0.0213774	0.477736	ENSMUSG00000030108.14	ENSMUSG00000030108	Slc6a13	6	121300227	121337733	121300227	1	solute carrier family 6 (neurotransmitter transporter, GABA), member 13 [Source:MGI Symbol;Acc:MGI:95629]
ENSMUSG00000037428.14	6905.45	-0.561067	0.243838	-2.30098	0.0213929	0.477736	ENSMUSG00000037428.14	ENSMUSG00000037428	Vgf	5	137026392	137033351	137026392	1	VGF nerve growth factor inducible [Source:MGI Symbol;Acc:MGI:1343180]
ENSMUSG00000102206.5	607.535	0.29099	0.126467	2.30092	0.0213963	0.477736	ENSMUSG00000102206.5	ENSMUSG00000102206	Pcdha11	18	37010712	37187657	37010712	1	protocadherin alpha 11 [Source:MGI Symbol;Acc:MGI:1298372]
ENSMUSG00000037697.19	3967.79	-0.11614	0.0505109	-2.29931	0.0214876	0.478682	ENSMUSG00000037697.19	ENSMUSG00000037697	Ddhd1	14	45588467	45658143	45658142	-1	DDHD domain containing 1 [Source:MGI Symbol;Acc:MGI:2150302]
ENSMUSG00000026000.16	7341.29	0.124111	0.053979	2.29924	0.0214913	0.478682	ENSMUSG00000026000.16	ENSMUSG00000026000	Lancl1	1	67000517	67038872	67038865	-1	LanC (bacterial lantibiotic synthetase component C)-like 1 [Source:MGI Symbol;Acc:MGI:1336997]
ENSMUSG00000052544.9	669.16	0.255867	0.111312	2.29864	0.0215254	0.478855	ENSMUSG00000052544.9	ENSMUSG00000052544	St6galnac3	3	153198266	153725174	153725174	-1	ST6 (alpha-N-acetyl-neuraminyl-2,3-beta-galactosyl-1,3)-N-acetylgalactosaminide alpha-2,6-sialyltransferase 3 [Source:MGI Symbol;Acc:MGI:1341828]
ENSMUSG00000019787.9	231.604	-2.17495	0.946599	-2.29765	0.021582	0.479441	ENSMUSG00000019787.9	ENSMUSG00000019787	Trdn	10	33080554	33476709	33080554	1	triadin [Source:MGI Symbol;Acc:MGI:1924007]
ENSMUSG00000022682.8	4859.13	0.121223	0.0527687	2.29725	0.0216045	0.479441	ENSMUSG00000022682.8	ENSMUSG00000022682	Rrn3	16	13780708	13814839	13780708	1	RRN3 RNA polymerase I transcription factor homolog (yeast) [Source:MGI Symbol;Acc:MGI:1925255]
ENSMUSG00000033439.12	116.723	0.509538	0.22191	2.29614	0.0216676	0.479575	ENSMUSG00000033439.12	ENSMUSG00000033439	Trmt13	3	116581093	116614587	116614587	-1	tRNA methyltransferase 13 [Source:MGI Symbol;Acc:MGI:1925219]
ENSMUSG00000032279.11	7646.16	0.0976875	0.0425508	2.29579	0.021688	0.479575	ENSMUSG00000032279.11	ENSMUSG00000032279	Idh3a	9	54586334	54604661	54586334	1	isocitrate dehydrogenase 3 (NAD+) alpha [Source:MGI Symbol;Acc:MGI:1915084]
ENSMUSG00000040260.8	3631.9	-0.180694	0.0787153	-2.29553	0.0217025	0.479575	ENSMUSG00000040260.8	ENSMUSG00000040260	Daam2	17	49456022	49564343	49564337	-1	dishevelled associated activator of morphogenesis 2 [Source:MGI Symbol;Acc:MGI:1923691]
ENSMUSG00000025017.10	156.297	-0.4376	0.190658	-2.2952	0.0217215	0.479575	ENSMUSG00000025017.10	ENSMUSG00000025017	Pik3ap1	19	41272377	41385102	41385096	-1	phosphoinositide-3-kinase adaptor protein 1 [Source:MGI Symbol;Acc:MGI:1933177]
ENSMUSG00000021904.6	2019.29	-0.174454	0.0760533	-2.29384	0.0217999	0.479575	ENSMUSG00000021904.6	ENSMUSG00000021904	Sema3g	14	31217860	31230352	31217860	1	sema domain, immunoglobulin domain (Ig), short basic domain, secreted, (semaphorin) 3G [Source:MGI Symbol;Acc:MGI:3041242]
ENSMUSG00000026443.3	1788.47	0.176451	0.0769327	2.29358	0.0218146	0.479575	ENSMUSG00000026443.3	ENSMUSG00000026443	Lrrn2	1	132880273	132940005	132880273	1	leucine rich repeat protein 2, neuronal [Source:MGI Symbol;Acc:MGI:106037]
ENSMUSG00000030592.18	847.443	-2.54914	1.1115	-2.29342	0.0218239	0.479575	ENSMUSG00000030592.18	ENSMUSG00000030592	Ryr1	7	29003344	29125179	29125015	-1	ryanodine receptor 1, skeletal muscle [Source:MGI Symbol;Acc:MGI:99659]
ENSMUSG00000024659.15	291.669	-0.352968	0.153924	-2.29313	0.0218405	0.479575	ENSMUSG00000024659.15	ENSMUSG00000024659	Anxa1	19	20373428	20390944	20390673	-1	annexin A1 [Source:MGI Symbol;Acc:MGI:96819]
ENSMUSG00000036890.13	743.038	0.209329	0.0913071	2.29258	0.0218724	0.479575	ENSMUSG00000036890.13	ENSMUSG00000036890	Gtdc1	2	44564412	44927657	44861622	-1	glycosyltransferase-like domain containing 1 [Source:MGI Symbol;Acc:MGI:2444269]
ENSMUSG00000049690.15	46.5224	1.01863	0.444325	2.29254	0.0218744	0.479575	ENSMUSG00000049690.15	ENSMUSG00000049690	Nckap5	1	125913620	126830799	126492927	-1	NCK-associated protein 5 [Source:MGI Symbol;Acc:MGI:2686394]
ENSMUSG00000046836.13	6787.76	0.116849	0.0510019	2.29107	0.0219592	0.479941	ENSMUSG00000046836.13	ENSMUSG00000046836	Brox	1	183276352	183297269	183296992	-1	BRO1 domain and CAAX motif containing [Source:MGI Symbol;Acc:MGI:1918928]
ENSMUSG00000025089.15	8837.01	-0.109863	0.0479527	-2.29107	0.0219596	0.479941	ENSMUSG00000025089.15	ENSMUSG00000025089	Gfra1	19	58235604	58455909	58455398	-1	glial cell line derived neurotrophic factor family receptor alpha 1 [Source:MGI Symbol;Acc:MGI:1100842]
ENSMUSG00000052160.7	142.417	-0.532996	0.232672	-2.29076	0.0219772	0.479941	ENSMUSG00000052160.7	ENSMUSG00000052160	Pld4	12	112760655	112768990	112760655	1	phospholipase D family, member 4 [Source:MGI Symbol;Acc:MGI:2144765]
ENSMUSG00000042215.8	1112.91	-0.239848	0.104718	-2.29042	0.0219967	0.479941	ENSMUSG00000042215.8	ENSMUSG00000042215	Bag2	1	33745484	33757795	33757795	-1	BCL2-associated athanogene 2 [Source:MGI Symbol;Acc:MGI:1891254]
ENSMUSG00000034485.10	4690.08	-0.149502	0.0653139	-2.28898	0.0220807	0.481194	ENSMUSG00000034485.10	ENSMUSG00000034485	Uaca	9	60794542	60880370	60794542	1	uveal autoantigen with coiled-coil domains and ankyrin repeats [Source:MGI Symbol;Acc:MGI:1919815]
ENSMUSG00000057143.15	354.791	-0.302878	0.132529	-2.28537	0.022291	0.484431	ENSMUSG00000057143.15	ENSMUSG00000057143	Trim12c	7	104338754	104353362	104353362	-1	tripartite motif-containing 12C [Source:MGI Symbol;Acc:MGI:4821183]
ENSMUSG00000096917.2	62.9608	0.732416	0.320505	2.2852	0.0223013	0.484431	ENSMUSG00000096917.2	ENSMUSG00000096917	2500002B13Rik	8	57488054	57508877	57488054	1	RIKEN cDNA 2500002B13 gene [Source:MGI Symbol;Acc:MGI:1925603]
ENSMUSG00000087064.1	57.0719	-0.945595	0.413836	-2.28495	0.0223159	0.484431	ENSMUSG00000087064.1	ENSMUSG00000087064	Sap30bpos	11	115946450	115952105	115952105	-1	SAP30 binding protein, opposite strand [Source:MGI Symbol;Acc:MGI:3650575]
ENSMUSG00000058325.6	1034.34	-0.229804	0.100592	-2.28451	0.0223417	0.484431	ENSMUSG00000058325.6	ENSMUSG00000058325	Dock1	7	134670654	135173639	134670654	1	dedicator of cytokinesis 1 [Source:MGI Symbol;Acc:MGI:2429765]
ENSMUSG00000014329.14	699.912	-0.214373	0.0938568	-2.28405	0.0223688	0.484431	ENSMUSG00000014329.14	ENSMUSG00000014329	Bicc1	10	70922832	71159700	71159700	-1	BicC family RNA binding protein 1 [Source:MGI Symbol;Acc:MGI:1933388]
ENSMUSG00000039304.11	131.892	-0.478434	0.2095	-2.2837	0.0223891	0.484431	ENSMUSG00000039304.11	ENSMUSG00000039304	Tnfsf10	3	27317028	27342427	27317028	1	tumor necrosis factor (ligand) superfamily, member 10 [Source:MGI Symbol;Acc:MGI:107414]
ENSMUSG00000032076.20	17071.7	0.102215	0.0447847	2.28238	0.0224671	0.485169	ENSMUSG00000032076.20	ENSMUSG00000032076	Cadm1	9	47530173	47858115	47530173	1	cell adhesion molecule 1 [Source:MGI Symbol;Acc:MGI:1889272]
ENSMUSG00000062044.16	630.94	-0.34106	0.14951	-2.28119	0.0225373	0.485169	ENSMUSG00000062044.16	ENSMUSG00000062044	Lmtk3	7	45783738	45804144	45783738	1	lemur tyrosine kinase 3 [Source:MGI Symbol;Acc:MGI:3039582]
ENSMUSG00000031099.16	1738.1	0.197193	0.0864573	2.28081	0.0225596	0.485169	ENSMUSG00000031099.16	ENSMUSG00000031099	Smarca1	X	47809368	47892974	47892519	-1	SWI/SNF related, matrix associated, actin dependent regulator of chromatin, subfamily a, member 1 [Source:MGI Symbol;Acc:MGI:1935127]
ENSMUSG00000042632.17	2351.24	-0.173838	0.0762534	-2.27975	0.0226228	0.485169	ENSMUSG00000042632.17	ENSMUSG00000042632	Pla2g6	15	79286228	79328390	79327964	-1	phospholipase A2, group VI [Source:MGI Symbol;Acc:MGI:1859152]
ENSMUSG00000027792.11	1044.04	0.2129	0.0934244	2.27885	0.0226761	0.485169	ENSMUSG00000027792.11	ENSMUSG00000027792	Bche	3	73635808	73708415	73708415	-1	butyrylcholinesterase [Source:MGI Symbol;Acc:MGI:894278]
ENSMUSG00000029038.9	3338.81	0.113491	0.0498112	2.27843	0.0227009	0.485169	ENSMUSG00000029038.9	ENSMUSG00000029038	Ssu72	4	155704800	155733879	155704800	1	Ssu72 RNA polymerase II CTD phosphatase homolog (yeast) [Source:MGI Symbol;Acc:MGI:1916241]
ENSMUSG00000074575.4	307.698	-0.39951	0.17535	-2.27835	0.0227056	0.485169	ENSMUSG00000074575.4	ENSMUSG00000074575	Kcng1	2	168260117	168281736	168281132	-1	potassium voltage-gated channel, subfamily G, member 1 [Source:MGI Symbol;Acc:MGI:3616086]
ENSMUSG00000038403.10	133.92	-2.65326	1.16465	-2.27817	0.0227167	0.485169	ENSMUSG00000038403.10	ENSMUSG00000038403	Hjv	3	96525172	96529210	96525172	1	hemojuvelin BMP co-receptor [Source:MGI Symbol;Acc:MGI:1916835]
ENSMUSG00000033196.17	429.551	-2.11404	0.928524	-2.27677	0.0227998	0.485169	ENSMUSG00000033196.17	ENSMUSG00000033196	Myh2	11	67171027	67197517	67171066	1	myosin, heavy polypeptide 2, skeletal muscle, adult [Source:MGI Symbol;Acc:MGI:1339710]
ENSMUSG00000021448.8	279.988	-0.327684	0.143926	-2.27675	0.0228014	0.485169	ENSMUSG00000021448.8	ENSMUSG00000021448	Shc3	13	51431041	51569487	51569487	-1	src homology 2 domain-containing transforming protein C3 [Source:MGI Symbol;Acc:MGI:106179]
ENSMUSG00000034911.8	206.889	-0.41867	0.183907	-2.27653	0.0228141	0.485169	ENSMUSG00000034911.8	ENSMUSG00000034911	Ushbp1	8	71384272	71395802	71395790	-1	USH1 protein network component harmonin binding protein 1 [Source:MGI Symbol;Acc:MGI:1922920]
ENSMUSG00000026019.15	2047.9	-0.170352	0.0748334	-2.27642	0.0228212	0.485169	ENSMUSG00000026019.15	ENSMUSG00000026019	Wdr12	1	60069785	60098645	60097908	-1	WD repeat domain 12 [Source:MGI Symbol;Acc:MGI:1927241]
ENSMUSG00000048439.15	415.843	0.277834	0.122058	2.27625	0.0228309	0.485169	ENSMUSG00000048439.15	ENSMUSG00000048439	Nupl2	5	24164963	24184013	24164963	1	nucleoporin like 2 [Source:MGI Symbol;Acc:MGI:2387631]
ENSMUSG00000026585.13	17651.4	0.119663	0.0525708	2.27623	0.0228323	0.485169	ENSMUSG00000026585.13	ENSMUSG00000026585	Kifap3	1	163779583	163917109	163779583	1	kinesin-associated protein 3 [Source:MGI Symbol;Acc:MGI:107566]
ENSMUSG00000021196.14	25067	0.106173	0.0466488	2.27601	0.0228453	0.485169	ENSMUSG00000021196.14	ENSMUSG00000021196	Pfkp	13	6579768	6648777	6588966	-1	phosphofructokinase, platelet [Source:MGI Symbol;Acc:MGI:1891833]
ENSMUSG00000041301.15	5.08633	-3.84003	1.68722	-2.27595	0.0228493	NA	ENSMUSG00000041301.15	ENSMUSG00000041301	Cftr	6	18170687	18322768	18170687	1	cystic fibrosis transmembrane conductance regulator [Source:MGI Symbol;Acc:MGI:88388]
ENSMUSG00000020388.12	533.826	-0.265591	0.116703	-2.27579	0.0228588	0.485169	ENSMUSG00000020388.12	ENSMUSG00000020388	Pdlim4	11	54054928	54069014	54069014	-1	PDZ and LIM domain 4 [Source:MGI Symbol;Acc:MGI:1353470]
ENSMUSG00000028332.13	21.9226	1.69018	0.743359	2.27371	0.0229834	0.485169	ENSMUSG00000028332.13	ENSMUSG00000028332	Hemgn	4	46393989	46413506	46404236	-1	hemogen [Source:MGI Symbol;Acc:MGI:2136910]
ENSMUSG00000026126.15	39.372	-1.2695	0.558392	-2.27349	0.0229968	0.485169	ENSMUSG00000026126.15	ENSMUSG00000026126	Ptpn18	1	34459762	34475733	34459762	1	protein tyrosine phosphatase, non-receptor type 18 [Source:MGI Symbol;Acc:MGI:108410]
ENSMUSG00000033059.7	56849.7	0.129701	0.0570513	2.27342	0.023001	0.485169	ENSMUSG00000033059.7	ENSMUSG00000033059	Pygb	2	150786735	150831758	150786735	1	brain glycogen phosphorylase [Source:MGI Symbol;Acc:MGI:97828]
ENSMUSG00000017978.18	2412.38	0.173423	0.076284	2.27339	0.0230025	0.485169	ENSMUSG00000017978.18	ENSMUSG00000017978	Cadps2	6	23262773	23839421	23839420	-1	Ca2+-dependent activator protein for secretion 2 [Source:MGI Symbol;Acc:MGI:2443963]
ENSMUSG00000031072.14	2299.78	-0.146953	0.0646557	-2.27286	0.0230347	0.485169	ENSMUSG00000031072.14	ENSMUSG00000031072	LTO1	7	144915100	144931701	144915100	1	ABCE maturation factor [Source:MGI Symbol;Acc:MGI:1919534]
ENSMUSG00000034947.13	411.784	-0.284567	0.125209	-2.27275	0.0230414	0.485169	ENSMUSG00000034947.13	ENSMUSG00000034947	Tmem106a	11	101582242	101591788	101582242	1	transmembrane protein 106A [Source:MGI Symbol;Acc:MGI:1922056]
ENSMUSG00000033187.8	6.40777	-3.08201	1.35609	-2.27272	0.0230431	NA	ENSMUSG00000033187.8	ENSMUSG00000033187	BC016579	16	45626848	45654068	45654068	-1	cDNA sequence, BC016579 [Source:MGI Symbol;Acc:MGI:2384848]
ENSMUSG00000033318.7	189.296	-0.431938	0.190108	-2.27206	0.0230826	0.485169	ENSMUSG00000033318.7	ENSMUSG00000033318	Gstt2	10	75831114	75837424	75837367	-1	glutathione S-transferase, theta 2 [Source:MGI Symbol;Acc:MGI:106188]
ENSMUSG00000075511.9	2840.53	0.17599	0.0774694	2.27174	0.0231024	0.485169	ENSMUSG00000075511.9	ENSMUSG00000075511	1700001L05Rik	15	83353847	83367282	83367282	-1	RIKEN cDNA 1700001L05 gene [Source:MGI Symbol;Acc:MGI:1916541]
ENSMUSG00000046982.11	1164.31	-0.199099	0.0876532	-2.27145	0.02312	0.485169	ENSMUSG00000046982.11	ENSMUSG00000046982	Tshz1	18	84011627	84087706	84086404	-1	teashirt zinc finger family member 1 [Source:MGI Symbol;Acc:MGI:1346031]
ENSMUSG00000064339.1	17719.7	-0.42191	0.185746	-2.27144	0.0231205	0.485169	ENSMUSG00000064339.1	ENSMUSG00000064339	mt-Rnr2	MT	1094	2675	1094	1	mitochondrially encoded 16S rRNA [Source:MGI Symbol;Acc:MGI:102492]
ENSMUSG00000034157.12	3836.52	0.124136	0.0546724	2.27054	0.0231747	0.485169	ENSMUSG00000034157.12	ENSMUSG00000034157	Cipc	12	86947043	86965362	86947043	1	CLOCK interacting protein, circadian [Source:MGI Symbol;Acc:MGI:1919185]
ENSMUSG00000025537.12	87.2836	-2.3102	1.01788	-2.26962	0.0232309	0.485169	ENSMUSG00000025537.12	ENSMUSG00000025537	Phkg1	5	129863421	129898549	129879083	-1	phosphorylase kinase gamma 1 [Source:MGI Symbol;Acc:MGI:97579]
ENSMUSG00000020840.10	3109.06	0.121424	0.053508	2.26926	0.0232522	0.485169	ENSMUSG00000020840.10	ENSMUSG00000020840	Blmh	11	76924809	76987379	76924809	1	bleomycin hydrolase [Source:MGI Symbol;Acc:MGI:1345186]
ENSMUSG00000034573.14	2249.77	-0.164762	0.0726157	-2.26895	0.0232712	0.485169	ENSMUSG00000034573.14	ENSMUSG00000034573	Ptpn13	5	103425192	103598303	103425192	1	protein tyrosine phosphatase, non-receptor type 13 [Source:MGI Symbol;Acc:MGI:103293]
ENSMUSG00000018965.11	96740.3	0.0889673	0.0392122	2.26887	0.0232765	0.485169	ENSMUSG00000018965.11	ENSMUSG00000018965	Ywhah	5	33018816	33027966	33018816	1	tyrosine 3-monooxygenase/tryptophan 5-monooxygenase activation protein, eta polypeptide [Source:MGI Symbol;Acc:MGI:109194]
ENSMUSG00000036661.14	149.582	-0.645639	0.28466	-2.2681	0.0233229	0.485169	ENSMUSG00000036661.14	ENSMUSG00000036661	Dennd3	15	73512560	73572242	73512560	1	DENN/MADD domain containing 3 [Source:MGI Symbol;Acc:MGI:2146009]
ENSMUSG00000038146.8	753.701	-0.392719	0.173182	-2.26766	0.0233497	0.485169	ENSMUSG00000038146.8	ENSMUSG00000038146	Notch3	17	32120820	32166852	32166852	-1	notch 3 [Source:MGI Symbol;Acc:MGI:99460]
ENSMUSG00000035923.4	12.6859	-2.50897	1.10678	-2.26691	0.0233956	0.485169	ENSMUSG00000035923.4	ENSMUSG00000035923	Myf6	10	107492853	107494737	107494737	-1	myogenic factor 6 [Source:MGI Symbol;Acc:MGI:97253]
ENSMUSG00000079056.12	14360.8	0.122885	0.0542091	2.26687	0.023398	0.485169	ENSMUSG00000079056.12	ENSMUSG00000079056	Kcnip3	2	127456498	127522094	127521370	-1	Kv channel interacting protein 3, calsenilin [Source:MGI Symbol;Acc:MGI:1929258]
ENSMUSG00000032702.16	1247.78	-0.177664	0.0783843	-2.26658	0.023416	0.485169	ENSMUSG00000032702.16	ENSMUSG00000032702	Kank1	19	25236975	25434496	25236975	1	KN motif and ankyrin repeat domains 1 [Source:MGI Symbol;Acc:MGI:2147707]
ENSMUSG00000037936.15	919.758	-0.246444	0.108735	-2.26646	0.0234232	0.485169	ENSMUSG00000037936.15	ENSMUSG00000037936	Scarb1	5	125277087	125341094	125341094	-1	scavenger receptor class B, member 1 [Source:MGI Symbol;Acc:MGI:893578]
ENSMUSG00000049436.5	4.72905	3.09887	1.36733	2.26637	0.0234288	NA	ENSMUSG00000049436.5	ENSMUSG00000049436	Upk1b	16	38773184	38800328	38800328	-1	uroplakin 1B [Source:MGI Symbol;Acc:MGI:98912]
ENSMUSG00000031491.10	2754.06	0.187257	0.0826461	2.26576	0.0234658	0.485169	ENSMUSG00000031491.10	ENSMUSG00000031491	Chrna6	8	27403212	27413944	27413944	-1	cholinergic receptor, nicotinic, alpha polypeptide 6 [Source:MGI Symbol;Acc:MGI:106213]
ENSMUSG00000034445.8	517.945	-0.256438	0.113203	-2.26529	0.0234946	0.485169	ENSMUSG00000034445.8	ENSMUSG00000034445	Cyb561a3	19	10577172	10595961	10577172	1	cytochrome b561 family, member A3 [Source:MGI Symbol;Acc:MGI:2686925]
ENSMUSG00000055541.17	97.2665	-0.635109	0.280398	-2.26503	0.023511	0.485169	ENSMUSG00000055541.17	ENSMUSG00000055541	Lair1	7	4003402	4063204	4063179	-1	leukocyte-associated Ig-like receptor 1 [Source:MGI Symbol;Acc:MGI:105492]
ENSMUSG00000024055.15	496.577	-0.252799	0.111634	-2.26454	0.0235409	0.485169	ENSMUSG00000024055.15	ENSMUSG00000024055	Cyp4f13	17	32924688	32947402	32947402	-1	cytochrome P450, family 4, subfamily f, polypeptide 13 [Source:MGI Symbol;Acc:MGI:2158641]
ENSMUSG00000068699.12	481.207	-1.0538	0.465397	-2.26431	0.0235551	0.485169	ENSMUSG00000068699.12	ENSMUSG00000068699	Flnc	6	29433256	29461883	29433256	1	filamin C, gamma [Source:MGI Symbol;Acc:MGI:95557]
ENSMUSG00000038773.11	1843.85	-0.150648	0.0665501	-2.26368	0.0235941	0.485169	ENSMUSG00000038773.11	ENSMUSG00000038773	Kdm3b	18	34777047	34838660	34777047	1	KDM3B lysine (K)-specific demethylase 3B [Source:MGI Symbol;Acc:MGI:1923356]
ENSMUSG00000079330.9	34.4689	-1.01071	0.446536	-2.26345	0.023608	0.485169	ENSMUSG00000079330.9	ENSMUSG00000079330	Lemd1	1	132191431	132259227	132191431	1	LEM domain containing 1 [Source:MGI Symbol;Acc:MGI:1922403]
ENSMUSG00000020782.18	77.9663	-0.69849	0.308632	-2.26318	0.0236245	0.485169	ENSMUSG00000020782.18	ENSMUSG00000020782	Llgl2	11	115824049	115855780	115824049	1	LLGL2 scribble cell polarity complex component [Source:MGI Symbol;Acc:MGI:1918843]
ENSMUSG00000071540.4	342.632	-0.489672	0.216537	-2.26137	0.0237362	0.486505	ENSMUSG00000071540.4	ENSMUSG00000071540	3425401B19Rik	14	32659119	32685293	32685272	-1	RIKEN cDNA 3425401B19 gene [Source:MGI Symbol;Acc:MGI:3588196]
ENSMUSG00000024002.18	4357.7	0.109734	0.0485357	2.2609	0.0237654	0.486505	ENSMUSG00000024002.18	ENSMUSG00000024002	Brd4	17	32196274	32284722	32284097	-1	bromodomain containing 4 [Source:MGI Symbol;Acc:MGI:1888520]
ENSMUSG00000019877.10	43463.3	0.110112	0.0487135	2.2604	0.0237966	0.486505	ENSMUSG00000019877.10	ENSMUSG00000019877	Serinc1	10	57515774	57532530	57532530	-1	serine incorporator 1 [Source:MGI Symbol;Acc:MGI:1926228]
ENSMUSG00000021990.16	5870.82	0.105502	0.046674	2.2604	0.0237966	0.486505	ENSMUSG00000021990.16	ENSMUSG00000021990	Spata13	14	60634001	60764556	60634001	1	spermatogenesis associated 13 [Source:MGI Symbol;Acc:MGI:104838]
ENSMUSG00000042622.14	189.193	-0.462668	0.204883	-2.2582	0.0239329	0.488742	ENSMUSG00000042622.14	ENSMUSG00000042622	Maff	15	79346621	79359076	79346621	1	v-maf musculoaponeurotic fibrosarcoma oncogene family, protein F (avian) [Source:MGI Symbol;Acc:MGI:96910]
ENSMUSG00000028980.14	646.213	-0.256694	0.113715	-2.25734	0.0239869	0.488767	ENSMUSG00000028980.14	ENSMUSG00000028980	H6pd	4	149979475	150009023	150003130	-1	hexose-6-phosphate dehydrogenase (glucose 1-dehydrogenase) [Source:MGI Symbol;Acc:MGI:2140356]
ENSMUSG00000015354.8	1880.64	-0.201147	0.089125	-2.25691	0.0240134	0.488767	ENSMUSG00000015354.8	ENSMUSG00000015354	Pcolce2	9	95637601	95698096	95637601	1	procollagen C-endopeptidase enhancer 2 [Source:MGI Symbol;Acc:MGI:1923727]
ENSMUSG00000033417.16	5112.15	0.107135	0.0474702	2.25689	0.0240148	0.488767	ENSMUSG00000033417.16	ENSMUSG00000033417	Cacul1	19	60524696	60581025	60581025	-1	CDK2 associated, cullin domain 1 [Source:MGI Symbol;Acc:MGI:1926082]
ENSMUSG00000002981.10	7070.28	0.121823	0.0540204	2.25513	0.0241253	0.490193	ENSMUSG00000002981.10	ENSMUSG00000002981	Clptm1	7	19631571	19665033	19665033	-1	cleft lip and palate associated transmembrane protein 1 [Source:MGI Symbol;Acc:MGI:1927155]
ENSMUSG00000024063.13	4086.84	-0.109475	0.0485526	-2.25478	0.0241473	0.490193	ENSMUSG00000024063.13	ENSMUSG00000024063	Lbh	17	72918305	72941947	72918305	1	limb-bud and heart [Source:MGI Symbol;Acc:MGI:1925139]
ENSMUSG00000001507.16	4448.28	-0.138701	0.0615307	-2.25417	0.0241853	0.490193	ENSMUSG00000001507.16	ENSMUSG00000001507	Itga3	11	95044474	95076801	95069198	-1	integrin alpha 3 [Source:MGI Symbol;Acc:MGI:96602]
ENSMUSG00000044288.6	2172.74	0.138437	0.0614259	2.25372	0.024214	0.490193	ENSMUSG00000044288.6	ENSMUSG00000044288	Cnr1	4	33924593	33948831	33924632	1	cannabinoid receptor 1 (brain) [Source:MGI Symbol;Acc:MGI:104615]
ENSMUSG00000031708.17	23765.7	0.104584	0.0464141	2.25328	0.0242417	0.490193	ENSMUSG00000031708.17	ENSMUSG00000031708	Tecr	8	83571698	83607971	83572940	-1	trans-2,3-enoyl-CoA reductase [Source:MGI Symbol;Acc:MGI:1915408]
ENSMUSG00000022311.15	125.979	0.736886	0.32704	2.2532	0.0242467	0.490193	ENSMUSG00000022311.15	ENSMUSG00000022311	Csmd3	15	47580637	48792063	48791933	-1	CUB and Sushi multiple domains 3 [Source:MGI Symbol;Acc:MGI:2386403]
ENSMUSG00000015748.13	682.883	-0.214414	0.0952125	-2.25196	0.0243251	0.491231	ENSMUSG00000015748.13	ENSMUSG00000015748	Prpf3	3	95830124	95855885	95855885	-1	pre-mRNA processing factor 3 [Source:MGI Symbol;Acc:MGI:1918017]
ENSMUSG00000055833.14	29.2797	1.24594	0.553549	2.25083	0.0243965	0.491818	ENSMUSG00000055833.14	ENSMUSG00000055833	1700034H15Rik	1	191886130	191907527	191900886	-1	RIKEN cDNA 1700034H15 gene [Source:MGI Symbol;Acc:MGI:1921515]
ENSMUSG00000023025.16	4079.51	0.126096	0.0560279	2.25059	0.0244115	0.491818	ENSMUSG00000023025.16	ENSMUSG00000023025	Larp4	15	99970065	100016358	99970065	1	La ribonucleoprotein domain family, member 4 [Source:MGI Symbol;Acc:MGI:2443114]
ENSMUSG00000066357.6	5345.47	0.138581	0.0615856	2.25021	0.0244353	0.491818	ENSMUSG00000066357.6	ENSMUSG00000066357	Wdr6	9	108572311	108578739	108578739	-1	WD repeat domain 6 [Source:MGI Symbol;Acc:MGI:1930140]
ENSMUSG00000024170.15	779.471	-0.242401	0.107758	-2.2495	0.0244809	0.492191	ENSMUSG00000024170.15	ENSMUSG00000024170	Telo2	17	25099570	25115967	25115907	-1	telomere maintenance 2 [Source:MGI Symbol;Acc:MGI:1918968]
ENSMUSG00000039891.6	138.54	-1.95142	0.868202	-2.24766	0.0245981	0.492766	ENSMUSG00000039891.6	ENSMUSG00000039891	Txlnb	10	17796226	17845665	17796226	1	taxilin beta [Source:MGI Symbol;Acc:MGI:2671945]
ENSMUSG00000031540.14	1874.46	-0.181901	0.0809295	-2.24764	0.0245989	0.492766	ENSMUSG00000031540.14	ENSMUSG00000031540	Kat6a	8	22859535	22943259	22859535	1	K(lysine) acetyltransferase 6A [Source:MGI Symbol;Acc:MGI:2442415]
ENSMUSG00000021750.16	1281.89	-0.234134	0.104171	-2.2476	0.0246017	0.492766	ENSMUSG00000021750.16	ENSMUSG00000021750	Fam107a	14	8296274	8318023	8309777	-1	family with sequence similarity 107, member A [Source:MGI Symbol;Acc:MGI:3041256]
ENSMUSG00000074207.10	146.868	-0.459098	0.204285	-2.24735	0.024618	0.492766	ENSMUSG00000074207.10	ENSMUSG00000074207	Adh1	3	138260991	138290698	138260991	1	alcohol dehydrogenase 1 (class I) [Source:MGI Symbol;Acc:MGI:87921]
ENSMUSG00000020601.8	5271.1	-0.161518	0.0719135	-2.246	0.024704	0.493944	ENSMUSG00000020601.8	ENSMUSG00000020601	Trib2	12	15791727	15816922	15816785	-1	tribbles pseudokinase 2 [Source:MGI Symbol;Acc:MGI:2145021]
ENSMUSG00000039377.7	101.964	-0.652145	0.290476	-2.24509	0.0247625	0.49457	ENSMUSG00000039377.7	ENSMUSG00000039377	Hlx	1	184727140	184732619	184732619	-1	H2.0-like homeobox [Source:MGI Symbol;Acc:MGI:96109]
ENSMUSG00000003810.13	7084.47	-0.108451	0.0483412	-2.24345	0.0248679	0.49613	ENSMUSG00000003810.13	ENSMUSG00000003810	Mast2	4	116306762	116464183	116371732	-1	microtubule associated serine/threonine kinase 2 [Source:MGI Symbol;Acc:MGI:894676]
ENSMUSG00000028760.16	12055.5	0.0896491	0.0399893	2.24183	0.0249725	0.49767	ENSMUSG00000028760.16	ENSMUSG00000028760	Eif4g3	4	137993022	138208508	137993022	1	eukaryotic translation initiation factor 4 gamma, 3 [Source:MGI Symbol;Acc:MGI:1923935]
ENSMUSG00000028126.16	1048.67	-0.196757	0.0878789	-2.23896	0.0251587	0.499125	ENSMUSG00000028126.16	ENSMUSG00000028126	Pip5k1a	3	95058530	95106930	95106875	-1	phosphatidylinositol-4-phosphate 5-kinase, type 1 alpha [Source:MGI Symbol;Acc:MGI:107929]
ENSMUSG00000059474.13	494.151	-0.262632	0.117314	-2.23871	0.0251746	0.499125	ENSMUSG00000059474.13	ENSMUSG00000059474	Mbtd1	11	93885852	93946985	93886217	1	mbt domain containing 1 [Source:MGI Symbol;Acc:MGI:2143977]
ENSMUSG00000038740.9	5524.4	-0.10051	0.0448995	-2.23855	0.0251853	0.499125	ENSMUSG00000038740.9	ENSMUSG00000038740	Mvb12b	2	33729953	33887946	33887946	-1	multivesicular body subunit 12B [Source:MGI Symbol;Acc:MGI:1919793]
ENSMUSG00000069833.13	25706.7	-0.113174	0.0505597	-2.23841	0.0251942	0.499125	ENSMUSG00000069833.13	ENSMUSG00000069833	Ahnak	19	8989284	9076914	8989284	1	AHNAK nucleoprotein (desmoyokin) [Source:MGI Symbol;Acc:MGI:1316648]
ENSMUSG00000042436.12	143.699	-0.520879	0.232713	-2.23829	0.0252021	0.499125	ENSMUSG00000042436.12	ENSMUSG00000042436	Mfap4	11	61485431	61488900	61485431	1	microfibrillar-associated protein 4 [Source:MGI Symbol;Acc:MGI:1342276]
ENSMUSG00000040296.15	1330.45	-0.204439	0.0913421	-2.23817	0.0252103	0.499125	ENSMUSG00000040296.15	ENSMUSG00000040296	Ddx58	4	40203773	40239828	40239828	-1	DEAD (Asp-Glu-Ala-Asp) box polypeptide 58 [Source:MGI Symbol;Acc:MGI:2442858]
ENSMUSG00000047773.15	298.633	0.344244	0.153877	2.23714	0.025277	0.499902	ENSMUSG00000047773.15	ENSMUSG00000047773	Ankfn1	11	89390223	89841266	89418948	-1	ankyrin-repeat and fibronectin type III domain containing 1 [Source:MGI Symbol;Acc:MGI:2686021]
ENSMUSG00000034951.10	2628.71	0.139356	0.0623292	2.23581	0.0253642	0.501004	ENSMUSG00000034951.10	ENSMUSG00000034951	Cog7	7	121879363	121981711	121882517	-1	component of oligomeric golgi complex 7 [Source:MGI Symbol;Acc:MGI:2685013]
ENSMUSG00000038393.14	3021.38	-0.222852	0.0997001	-2.23522	0.0254026	0.501004	ENSMUSG00000038393.14	ENSMUSG00000038393	Txnip	3	96557957	96561883	96557957	1	thioredoxin interacting protein [Source:MGI Symbol;Acc:MGI:1889549]
ENSMUSG00000007877.2	282.699	-1.92622	0.861852	-2.23498	0.0254188	0.501004	ENSMUSG00000007877.2	ENSMUSG00000007877	Tcap	11	98383811	98384953	98383811	1	titin-cap [Source:MGI Symbol;Acc:MGI:1330233]
ENSMUSG00000021482.10	1213.58	-0.244651	0.109483	-2.23461	0.025443	0.501004	ENSMUSG00000021482.10	ENSMUSG00000021482	Prxl2c	13	64275280	64312710	64279724	-1	peroxiredoxin like 2C [Source:MGI Symbol;Acc:MGI:1913379]
ENSMUSG00000093452.4	61.4573	-1.0214	0.457273	-2.23369	0.0255037	0.501183	ENSMUSG00000093452.4	ENSMUSG00000093452	Zfhx2os	14	55053869	55075873	55053869	1	zinc finger homeobox 2, opposite strand [Source:MGI Symbol;Acc:MGI:3620246]
ENSMUSG00000022865.14	209.818	-0.402976	0.180413	-2.23363	0.0255073	0.501183	ENSMUSG00000022865.14	ENSMUSG00000022865	Cxadr	16	78301489	78359774	78301489	1	coxsackie virus and adenovirus receptor [Source:MGI Symbol;Acc:MGI:1201679]
ENSMUSG00000071532.6	5.25526	3.91325	1.75333	2.2319	0.0256217	NA	ENSMUSG00000071532.6	ENSMUSG00000071532	Gm10335	10	14523078	14523545	14523078	1	predicted gene 10335 [Source:MGI Symbol;Acc:MGI:3641693]
ENSMUSG00000005251.15	160.686	0.528412	0.236776	2.23169	0.0256355	0.502886	ENSMUSG00000005251.15	ENSMUSG00000005251	Ripk4	16	97741933	97763787	97763787	-1	receptor-interacting serine-threonine kinase 4 [Source:MGI Symbol;Acc:MGI:1919638]
ENSMUSG00000030218.2	906.511	-0.333539	0.149521	-2.23072	0.0256997	0.502886	ENSMUSG00000030218.2	ENSMUSG00000030218	Mgp	6	136872435	136875823	136875823	-1	matrix Gla protein [Source:MGI Symbol;Acc:MGI:96976]
ENSMUSG00000074657.5	80232.2	0.117643	0.0527528	2.23008	0.0257424	0.502886	ENSMUSG00000074657.5	ENSMUSG00000074657	Kif5a	10	127225696	127263348	127263348	-1	kinesin family member 5A [Source:MGI Symbol;Acc:MGI:109564]
ENSMUSG00000020664.10	7146.44	0.110456	0.0495572	2.22887	0.0258226	0.502886	ENSMUSG00000020664.10	ENSMUSG00000020664	Dld	12	31331277	31351453	31351453	-1	dihydrolipoamide dehydrogenase [Source:MGI Symbol;Acc:MGI:107450]
ENSMUSG00000036699.12	643.685	0.315431	0.141558	2.22829	0.0258613	0.502886	ENSMUSG00000036699.12	ENSMUSG00000036699	Zcchc12	X	36195904	36199158	36195904	1	zinc finger, CCHC domain containing 12 [Source:MGI Symbol;Acc:MGI:1919943]
ENSMUSG00000027248.13	16010.7	-0.0946945	0.0425099	-2.22759	0.0259082	0.502886	ENSMUSG00000027248.13	ENSMUSG00000027248	Pdia3	2	121413775	121438687	121413775	1	protein disulfide isomerase associated 3 [Source:MGI Symbol;Acc:MGI:95834]
ENSMUSG00000021764.8	2389.01	-0.171715	0.0770975	-2.22724	0.0259311	0.502886	ENSMUSG00000021764.8	ENSMUSG00000021764	Ndufs4	13	114287795	114388258	114388258	-1	NADH:ubiquinone oxidoreductase core subunit S4 [Source:MGI Symbol;Acc:MGI:1343135]
ENSMUSG00000027408.7	862.398	0.205966	0.0924837	2.22706	0.0259435	0.502886	ENSMUSG00000027408.7	ENSMUSG00000027408	Cpxm1	2	130390775	130397574	130397574	-1	carboxypeptidase X 1 (M14 family) [Source:MGI Symbol;Acc:MGI:1934569]
ENSMUSG00000028822.11	7795.01	0.108975	0.0489488	2.22631	0.0259934	0.502886	ENSMUSG00000028822.11	ENSMUSG00000028822	Tmem50a	4	134897849	134915024	134915024	-1	transmembrane protein 50A [Source:MGI Symbol;Acc:MGI:1919067]
ENSMUSG00000017499.15	34.6633	-1.54072	0.692131	-2.22605	0.0260106	0.502886	ENSMUSG00000017499.15	ENSMUSG00000017499	Cdc6	11	98907801	98923940	98907801	1	cell division cycle 6 [Source:MGI Symbol;Acc:MGI:1345150]
ENSMUSG00000024413.14	2751.31	0.119688	0.0537726	2.22581	0.0260266	0.502886	ENSMUSG00000024413.14	ENSMUSG00000024413	Npc1	18	12189692	12236400	12195407	-1	NPC intracellular cholesterol transporter 1 [Source:MGI Symbol;Acc:MGI:1097712]
ENSMUSG00000026814.16	865.116	-0.301636	0.135524	-2.2257	0.0260342	0.502886	ENSMUSG00000026814.16	ENSMUSG00000026814	Eng	2	32646595	32682669	32646595	1	endoglin [Source:MGI Symbol;Acc:MGI:95392]
ENSMUSG00000062393.13	346.405	-0.324048	0.1456	-2.2256	0.026041	0.502886	ENSMUSG00000062393.13	ENSMUSG00000062393	Dgkk	X	6779306	6948363	6873484	1	diacylglycerol kinase kappa [Source:MGI Symbol;Acc:MGI:3580254]
ENSMUSG00000103310.1	1238.21	0.23089	0.103773	2.22496	0.026084	0.502886	ENSMUSG00000103310.1	ENSMUSG00000103310	Pcdha12	18	37020149	37187657	37020149	1	protocadherin alpha 12 [Source:MGI Symbol;Acc:MGI:1298370]
ENSMUSG00000024526.9	168.38	0.507486	0.228126	2.22458	0.0261093	0.502886	ENSMUSG00000024526.9	ENSMUSG00000024526	Cidea	18	67343604	67367785	67343604	1	cell death-inducing DNA fragmentation factor, alpha subunit-like effector A [Source:MGI Symbol;Acc:MGI:1270845]
ENSMUSG00000056973.6	50.0012	0.913688	0.41073	2.22455	0.0261116	0.502886	ENSMUSG00000056973.6	ENSMUSG00000056973	Ces1d	8	93166068	93197838	93197838	-1	carboxylesterase 1D [Source:MGI Symbol;Acc:MGI:2148202]
ENSMUSG00000072692.7	154.012	-1.34786	0.605934	-2.22443	0.0261193	0.502886	ENSMUSG00000072692.7	ENSMUSG00000072692	Rpl37rt	5	115102923	115110268	115110268	-1	ribosomal protein L37, retrotransposed [Source:MGI Symbol;Acc:MGI:3651519]
ENSMUSG00000024426.17	479.237	0.248495	0.11173	2.22407	0.0261438	0.502886	ENSMUSG00000024426.17	ENSMUSG00000024426	Atat1	17	35897595	35910075	35910075	-1	alpha tubulin acetyltransferase 1 [Source:MGI Symbol;Acc:MGI:1913869]
ENSMUSG00000040390.13	4919.49	-0.113464	0.0510352	-2.22324	0.0261995	0.502886	ENSMUSG00000040390.13	ENSMUSG00000040390	Map3k10	7	27656375	27674598	27674594	-1	mitogen-activated protein kinase kinase kinase 10 [Source:MGI Symbol;Acc:MGI:1346879]
ENSMUSG00000031442.21	3966.88	-0.14842	0.066772	-2.22279	0.0262303	0.502886	ENSMUSG00000031442.21	ENSMUSG00000031442	Mcf2l	8	12873806	13020905	12873806	1	mcf.2 transforming sequence-like [Source:MGI Symbol;Acc:MGI:103263]
ENSMUSG00000020427.11	709.171	-0.301647	0.135708	-2.22276	0.0262318	0.502886	ENSMUSG00000020427.11	ENSMUSG00000020427	Igfbp3	11	7206086	7213923	7213897	-1	insulin-like growth factor binding protein 3 [Source:MGI Symbol;Acc:MGI:96438]
ENSMUSG00000035296.14	44.3242	-2.70039	1.21507	-2.22242	0.0262548	0.502886	ENSMUSG00000035296.14	ENSMUSG00000035296	Sgcg	14	61219115	61258490	61258490	-1	sarcoglycan, gamma (dystrophin-associated glycoprotein) [Source:MGI Symbol;Acc:MGI:1346524]
ENSMUSG00000030677.8	119.725	-0.634117	0.285431	-2.22162	0.0263092	0.502886	ENSMUSG00000030677.8	ENSMUSG00000030677	Kif22	7	127027729	127042471	127028957	-1	kinesin family member 22 [Source:MGI Symbol;Acc:MGI:109233]
ENSMUSG00000032540.16	1680.25	-0.160673	0.0723426	-2.221	0.026351	0.502886	ENSMUSG00000032540.16	ENSMUSG00000032540	Abhd5	9	122351608	122381524	122351608	1	abhydrolase domain containing 5 [Source:MGI Symbol;Acc:MGI:1914719]
ENSMUSG00000049960.4	682.772	-0.212275	0.0955817	-2.22088	0.0263592	0.502886	ENSMUSG00000049960.4	ENSMUSG00000049960	Mrps16	14	20389304	20393634	20393634	-1	mitochondrial ribosomal protein S16 [Source:MGI Symbol;Acc:MGI:1913492]
ENSMUSG00000093674.7	7805.08	-0.12243	0.0551345	-2.22057	0.0263802	0.502886	ENSMUSG00000093674.7	ENSMUSG00000093674	Rpl41	10	128548114	128549305	128549153	-1	ribosomal protein L41 [Source:MGI Symbol;Acc:MGI:1915195]
ENSMUSG00000033499.14	5372.07	0.118324	0.0532865	2.22053	0.0263829	0.502886	ENSMUSG00000033499.14	ENSMUSG00000033499	Larp4b	13	9093881	9174451	9093881	1	La ribonucleoprotein domain family, member 4B [Source:MGI Symbol;Acc:MGI:106330]
ENSMUSG00000075307.3	109.142	-2.37085	1.06782	-2.22028	0.0263995	0.502886	ENSMUSG00000075307.3	ENSMUSG00000075307	Klhl41	2	69670120	69684230	69670120	1	kelch-like 41 [Source:MGI Symbol;Acc:MGI:2683854]
ENSMUSG00000015947.10	47.0547	-0.760674	0.342608	-2.22025	0.0264021	0.502886	ENSMUSG00000015947.10	ENSMUSG00000015947	Fcgr1	3	96282909	96293969	96293969	-1	Fc receptor, IgG, high affinity I [Source:MGI Symbol;Acc:MGI:95498]
ENSMUSG00000097580.1	11.3547	1.55749	0.701596	2.21992	0.026424	0.502886	ENSMUSG00000097580.1	ENSMUSG00000097580	Gm5432	12	15817003	15888155	15817003	1	predicted gene 5432 [Source:MGI Symbol;Acc:MGI:3649057]
ENSMUSG00000111662.1	25.8115	1.13231	0.510446	2.21827	0.0265361	0.504491	ENSMUSG00000111662.1	ENSMUSG00000111662	Gm7435	9	55938252	55952409	55938252	1	predicted gene 7435 [Source:MGI Symbol;Acc:MGI:3646489]
ENSMUSG00000019890.4	267.72	-0.624582	0.28165	-2.21758	0.0265834	0.504863	ENSMUSG00000019890.4	ENSMUSG00000019890	Nts	10	102481756	102490486	102490486	-1	neurotensin [Source:MGI Symbol;Acc:MGI:1328351]
ENSMUSG00000027495.4	886.976	-0.193757	0.0873997	-2.21691	0.0266294	0.505207	ENSMUSG00000027495.4	ENSMUSG00000027495	Fam210b	2	172345565	172355749	172345565	1	family with sequence similarity 210, member B [Source:MGI Symbol;Acc:MGI:1914267]
ENSMUSG00000029882.5	2.2479	4.56691	2.06046	2.21645	0.0266605	NA	ENSMUSG00000029882.5	ENSMUSG00000029882	2210010C04Rik	6	41030268	41035509	41035509	-1	RIKEN cDNA 2210010C04 gene [Source:MGI Symbol;Acc:MGI:1914623]
ENSMUSG00000047719.2	247.151	0.338929	0.152918	2.21641	0.0266632	0.505322	ENSMUSG00000047719.2	ENSMUSG00000047719	Ubiad1	4	148434495	148444771	148444771	-1	UbiA prenyltransferase domain containing 1 [Source:MGI Symbol;Acc:MGI:1918957]
ENSMUSG00000050623.5	222.821	-0.432098	0.195074	-2.21504	0.0267573	0.506507	ENSMUSG00000050623.5	ENSMUSG00000050623	Catsperz	19	6922371	6925380	6924869	-1	cation channel sperm associated auxiliary subunit zeta [Source:MGI Symbol;Acc:MGI:1914327]
ENSMUSG00000025129.2	16.8094	-4.73853	2.13959	-2.21469	0.0267815	0.506507	ENSMUSG00000025129.2	ENSMUSG00000025129	Ppp1r27	11	120549979	120551132	120551132	-1	protein phosphatase 1, regulatory subunit 27 [Source:MGI Symbol;Acc:MGI:1915951]
ENSMUSG00000024127.15	20274	0.14644	0.0661362	2.21422	0.0268137	0.50659	ENSMUSG00000024127.15	ENSMUSG00000024127	Prepl	17	85063470	85090241	85090221	-1	prolyl endopeptidase-like [Source:MGI Symbol;Acc:MGI:2441932]
ENSMUSG00000022974.12	724.433	-0.234572	0.105976	-2.21345	0.0268668	0.507066	ENSMUSG00000022974.12	ENSMUSG00000022974	Paxbp1	16	91014037	91044543	91044543	-1	PAX3 and PAX7 binding protein 1 [Source:MGI Symbol;Acc:MGI:1914617]
ENSMUSG00000032571.14	2333.75	0.134115	0.0606187	2.21243	0.0269367	0.507856	ENSMUSG00000032571.14	ENSMUSG00000032571	Pik3r4	9	105642978	105687657	105642978	1	phosphoinositide-3-kinase regulatory subunit 4 [Source:MGI Symbol;Acc:MGI:1922919]
ENSMUSG00000036622.15	15688.6	-0.101389	0.0458364	-2.21198	0.026968	0.507874	ENSMUSG00000036622.15	ENSMUSG00000036622	Atp13a2	4	140986873	141007330	140986900	1	ATPase type 13A2 [Source:MGI Symbol;Acc:MGI:1922022]
ENSMUSG00000104093.1	115.583	-0.539953	0.244145	-2.21161	0.0269935	0.507874	ENSMUSG00000104093.1	ENSMUSG00000104093	A330015K06Rik	3	65133060	65302685	65302685	-1	RIKEN cDNA A330015K06 gene [Source:MGI Symbol;Acc:MGI:2443553]
ENSMUSG00000027350.8	6825.89	0.123999	0.0560961	2.21047	0.0270726	0.508645	ENSMUSG00000027350.8	ENSMUSG00000027350	Chgb	2	132781278	132795079	132781278	1	chromogranin B [Source:MGI Symbol;Acc:MGI:88395]
ENSMUSG00000001285.12	1206.82	0.183833	0.0831745	2.21021	0.0270904	0.508645	ENSMUSG00000001285.12	ENSMUSG00000001285	Myg1	15	102331709	102338139	102331709	1	melanocyte proliferating gene 1 [Source:MGI Symbol;Acc:MGI:1929864]
ENSMUSG00000019189.13	4211.33	0.109593	0.0496052	2.20931	0.0271529	0.509293	ENSMUSG00000019189.13	ENSMUSG00000019189	Rnf145	11	44518964	44565520	44519442	1	ring finger protein 145 [Source:MGI Symbol;Acc:MGI:1921565]
ENSMUSG00000037465.10	981.437	0.188705	0.085436	2.20872	0.0271938	0.509533	ENSMUSG00000037465.10	ENSMUSG00000037465	Klf10	15	38291463	38300706	38300706	-1	Kruppel-like factor 10 [Source:MGI Symbol;Acc:MGI:1101353]
ENSMUSG00000025582.4	13991.3	-0.156647	0.0709551	-2.20769	0.0272656	0.510022	ENSMUSG00000025582.4	ENSMUSG00000025582	Nptx1	11	119538719	119547753	119547753	-1	neuronal pentraxin 1 [Source:MGI Symbol;Acc:MGI:107811]
ENSMUSG00000038763.12	62.4609	-2.36748	1.07258	-2.20727	0.0272949	0.510022	ENSMUSG00000038763.12	ENSMUSG00000038763	Alpk3	7	81057600	81105612	81057600	1	alpha-kinase 3 [Source:MGI Symbol;Acc:MGI:2151224]
ENSMUSG00000023456.16	24890.4	-0.113084	0.0512356	-2.20714	0.0273041	0.510022	ENSMUSG00000023456.16	ENSMUSG00000023456	Tpi1	6	124810586	124814296	124814296	-1	triosephosphate isomerase 1 [Source:MGI Symbol;Acc:MGI:98797]
ENSMUSG00000040044.11	1419.24	0.155846	0.0706291	2.20654	0.0273462	0.510284	ENSMUSG00000040044.11	ENSMUSG00000040044	Orc3	4	34570796	34614944	34614944	-1	origin recognition complex, subunit 3 [Source:MGI Symbol;Acc:MGI:1354944]
ENSMUSG00000013787.15	3878.04	-0.110902	0.0502759	-2.20586	0.027394	0.510652	ENSMUSG00000013787.15	ENSMUSG00000013787	Ehmt2	17	34898469	34914052	34898469	1	euchromatic histone lysine N-methyltransferase 2 [Source:MGI Symbol;Acc:MGI:2148922]
ENSMUSG00000063362.13	1762.36	0.156618	0.0710367	2.20475	0.0274719	0.511373	ENSMUSG00000063362.13	ENSMUSG00000063362	Alg11	8	22060721	22071627	22060721	1	asparagine-linked glycosylation 11 (alpha-1,2-mannosyltransferase) [Source:MGI Symbol;Acc:MGI:2142632]
ENSMUSG00000047694.12	3181.88	0.154362	0.0700213	2.2045	0.0274889	0.511373	ENSMUSG00000047694.12	ENSMUSG00000047694	Yipf6	X	98936316	98949017	98937761	1	Yip1 domain family, member 6 [Source:MGI Symbol;Acc:MGI:1925179]
ENSMUSG00000036782.13	1203.9	0.195648	0.0888223	2.20269	0.0276166	0.512708	ENSMUSG00000036782.13	ENSMUSG00000036782	Klhl13	X	23219271	23365082	23365082	-1	kelch-like 13 [Source:MGI Symbol;Acc:MGI:1914705]
ENSMUSG00000026492.11	1117.76	0.2044	0.0928083	2.20239	0.0276378	0.512708	ENSMUSG00000026492.11	ENSMUSG00000026492	Tfb2m	1	179528055	179546267	179546267	-1	transcription factor B2, mitochondrial [Source:MGI Symbol;Acc:MGI:107937]
ENSMUSG00000022656.15	1810.92	-0.23539	0.106884	-2.20228	0.0276453	0.512708	ENSMUSG00000022656.15	ENSMUSG00000022656	Nectin3	16	46387706	46498525	46496967	-1	nectin cell adhesion molecule 3 [Source:MGI Symbol;Acc:MGI:1930171]
ENSMUSG00000087178.7	83.1757	-0.616824	0.2802	-2.20138	0.0277094	0.513373	ENSMUSG00000087178.7	ENSMUSG00000087178	A230056P14Rik	7	55962531	55980868	55962531	1	RIKEN cDNA A230056P14 gene [Source:MGI Symbol;Acc:MGI:2444856]
ENSMUSG00000032254.10	100.517	-0.510893	0.232181	-2.2004	0.0277783	0.514082	ENSMUSG00000032254.10	ENSMUSG00000032254	Kif23	9	61915905	61946774	61921309	-1	kinesin family member 23 [Source:MGI Symbol;Acc:MGI:1919069]
ENSMUSG00000086539.8	40.5734	-0.909973	0.413617	-2.20004	0.0278043	0.514082	ENSMUSG00000086539.8	ENSMUSG00000086539	Gm16759	9	63398601	63568691	63398601	1	predicted gene, 16759 [Source:MGI Symbol;Acc:MGI:4439683]
ENSMUSG00000035953.14	5367.05	0.102546	0.0466472	2.19833	0.0279253	0.514226	ENSMUSG00000035953.14	ENSMUSG00000035953	Pip4p1	14	50926068	50930856	50930849	-1	phosphatidylinositol-4,5-bisphosphate 4-phosphatase 1 [Source:MGI Symbol;Acc:MGI:2448501]
ENSMUSG00000089762.3	267.384	0.348528	0.158559	2.1981	0.0279421	0.514226	ENSMUSG00000089762.3	ENSMUSG00000089762	Ier5l	2	30471537	30474219	30474219	-1	immediate early response 5-like [Source:MGI Symbol;Acc:MGI:1919750]
ENSMUSG00000063564.13	2494.53	-0.151405	0.0688804	-2.19808	0.0279433	0.514226	ENSMUSG00000063564.13	ENSMUSG00000063564	Col23a1	11	51289920	51583918	51289920	1	collagen, type XXIII, alpha 1 [Source:MGI Symbol;Acc:MGI:2653243]
ENSMUSG00000018774.13	78.715	-0.574517	0.261427	-2.19762	0.0279765	0.514226	ENSMUSG00000018774.13	ENSMUSG00000018774	Cd68	11	69664213	69666153	69666153	-1	CD68 antigen [Source:MGI Symbol;Acc:MGI:88342]
ENSMUSG00000039652.16	2551.52	0.185818	0.084575	2.19708	0.0280145	0.514226	ENSMUSG00000039652.16	ENSMUSG00000039652	Cpeb3	19	37021291	37208601	37207462	-1	cytoplasmic polyadenylation element binding protein 3 [Source:MGI Symbol;Acc:MGI:2443075]
ENSMUSG00000110067.2	190.607	0.509658	0.231971	2.19707	0.0280151	0.514226	ENSMUSG00000110067.2	ENSMUSG00000110067	6330411D24Rik	4	142598441	143074839	143074839	-1	RIKEN cDNA 6330411D24 gene [Source:MGI Symbol;Acc:MGI:1917975]
ENSMUSG00000021537.9	1364.24	-0.155306	0.0706952	-2.19684	0.0280317	0.514226	ENSMUSG00000021537.9	ENSMUSG00000021537	Cetn3	13	81783077	81797155	81783077	1	centrin 3 [Source:MGI Symbol;Acc:MGI:1097706]
ENSMUSG00000027087.11	2044	-0.197073	0.0897166	-2.19662	0.0280475	0.514226	ENSMUSG00000027087.11	ENSMUSG00000027087	Itgav	2	83724397	83806916	83724397	1	integrin alpha V [Source:MGI Symbol;Acc:MGI:96608]
ENSMUSG00000004110.17	447.425	-0.339748	0.154687	-2.19635	0.0280667	0.514226	ENSMUSG00000004110.17	ENSMUSG00000004110	Cacna1e	1	154390731	154884501	154726356	-1	calcium channel, voltage-dependent, R type, alpha 1E subunit [Source:MGI Symbol;Acc:MGI:106217]
ENSMUSG00000026959.13	7558.85	0.141124	0.0642712	2.19576	0.0281092	0.514487	ENSMUSG00000026959.13	ENSMUSG00000026959	Grin1	2	25291181	25319187	25319095	-1	glutamate receptor, ionotropic, NMDA1 (zeta 1) [Source:MGI Symbol;Acc:MGI:95819]
ENSMUSG00000107464.1	4.9758	2.70961	1.23439	2.19509	0.0281568	NA	ENSMUSG00000107464.1	ENSMUSG00000107464	Gm44150	6	131084231	131104337	131104337	-1	predicted gene, 44150 [Source:MGI Symbol;Acc:MGI:5690542]
ENSMUSG00000024083.16	28590.5	0.126928	0.057897	2.19231	0.0283572	0.518503	ENSMUSG00000024083.16	ENSMUSG00000024083	Pja2	17	64281005	64331916	64331916	-1	praja ring finger ubiquitin ligase 2 [Source:MGI Symbol;Acc:MGI:2159342]
ENSMUSG00000020137.5	702.455	0.284927	0.130065	2.19065	0.0284774	0.520179	ENSMUSG00000020137.5	ENSMUSG00000020137	Thap2	10	115368404	115384443	115384435	-1	THAP domain containing, apoptosis associated protein 2 [Source:MGI Symbol;Acc:MGI:1914066]
ENSMUSG00000034818.17	365.64	-0.298241	0.136199	-2.18975	0.0285427	0.520796	ENSMUSG00000034818.17	ENSMUSG00000034818	Celf5	10	81459227	81482709	81482709	-1	CUGBP, Elav-like family member 5 [Source:MGI Symbol;Acc:MGI:2442333]
ENSMUSG00000024349.10	237.435	-0.465389	0.212597	-2.18907	0.028592	0.520796	ENSMUSG00000024349.10	ENSMUSG00000024349	Sting1	18	35733679	35740554	35740462	-1	stimulator of interferon response cGAMP interactor 1 [Source:MGI Symbol;Acc:MGI:1919762]
ENSMUSG00000047126.17	42666.1	0.0966913	0.0441716	2.189	0.0285972	0.520796	ENSMUSG00000047126.17	ENSMUSG00000047126	Cltc	11	86694351	86757565	86757565	-1	clathrin, heavy polypeptide (Hc) [Source:MGI Symbol;Acc:MGI:2388633]
ENSMUSG00000058756.13	15275.9	0.114471	0.0523456	2.18684	0.0287543	0.523132	ENSMUSG00000058756.13	ENSMUSG00000058756	Thra	11	98740638	98769006	98740638	1	thyroid hormone receptor alpha [Source:MGI Symbol;Acc:MGI:98742]
ENSMUSG00000058740.14	9815.32	-0.0885979	0.0405312	-2.18592	0.0288214	0.52356	ENSMUSG00000058740.14	ENSMUSG00000058740	Kcnt1	2	25863734	25918273	25863734	1	potassium channel, subfamily T, member 1 [Source:MGI Symbol;Acc:MGI:1924627]
ENSMUSG00000038119.15	497.505	-0.364103	0.166582	-2.18573	0.0288354	0.52356	ENSMUSG00000038119.15	ENSMUSG00000038119	Cdon	9	35421128	35507652	35421128	1	cell adhesion molecule-related/down-regulated by oncogenes [Source:MGI Symbol;Acc:MGI:1926387]
ENSMUSG00000079164.8	208.95	0.368564	0.168758	2.18397	0.0289644	0.524887	ENSMUSG00000079164.8	ENSMUSG00000079164	Tlr5	1	182954788	182976044	182954788	1	toll-like receptor 5 [Source:MGI Symbol;Acc:MGI:1858171]
ENSMUSG00000033060.16	376.644	-0.497989	0.228023	-2.18395	0.0289663	0.524887	ENSMUSG00000033060.16	ENSMUSG00000033060	Lmo7	14	101729957	101934710	101729957	1	LIM domain only 7 [Source:MGI Symbol;Acc:MGI:1353586]
ENSMUSG00000049134.15	225.003	-2.36443	1.08346	-2.1823	0.0290875	0.526038	ENSMUSG00000049134.15	ENSMUSG00000049134	Nrap	19	56320035	56390037	56390011	-1	nebulin-related anchoring protein [Source:MGI Symbol;Acc:MGI:1098765]
ENSMUSG00000066306.13	4982.41	-0.112304	0.0514612	-2.1823	0.0290877	0.526038	ENSMUSG00000066306.13	ENSMUSG00000066306	Numa1	7	101934111	102014964	101934111	1	nuclear mitotic apparatus protein 1 [Source:MGI Symbol;Acc:MGI:2443665]
ENSMUSG00000039313.14	2783.87	0.200037	0.0917015	2.18139	0.0291546	0.52648	ENSMUSG00000039313.14	ENSMUSG00000039313	Minar1	9	89587216	89623125	89623125	-1	membrane integral NOTCH2 associated receptor 1 [Source:MGI Symbol;Acc:MGI:2667167]
ENSMUSG00000032267.8	561.191	0.315368	0.144588	2.18115	0.0291723	0.52648	ENSMUSG00000032267.8	ENSMUSG00000032267	Usp28	9	48985375	49042517	48985375	1	ubiquitin specific peptidase 28 [Source:MGI Symbol;Acc:MGI:2442293]
ENSMUSG00000065947.3	9109.37	-0.777699	0.356663	-2.18049	0.0292215	0.52648	ENSMUSG00000065947.3	ENSMUSG00000065947	mt-Nd4l	MT	9877	10173	9877	1	mitochondrially encoded NADH dehydrogenase 4L [Source:MGI Symbol;Acc:MGI:102497]
ENSMUSG00000026675.12	3819.91	0.129262	0.0592837	2.1804	0.029228	0.52648	ENSMUSG00000026675.12	ENSMUSG00000026675	Hsd17b7	1	169949535	169969241	169969241	-1	hydroxysteroid (17-beta) dehydrogenase 7 [Source:MGI Symbol;Acc:MGI:1330808]
ENSMUSG00000043088.16	59.4681	0.699872	0.321199	2.17894	0.0293361	0.527299	ENSMUSG00000043088.16	ENSMUSG00000043088	Il17re	6	113458484	113470758	113458484	1	interleukin 17 receptor E [Source:MGI Symbol;Acc:MGI:1889371]
ENSMUSG00000026280.17	6002.11	0.138065	0.0633827	2.17827	0.0293856	0.527299	ENSMUSG00000026280.17	ENSMUSG00000026280	Atg4b	1	93751500	93790610	93751500	1	autophagy related 4B, cysteine peptidase [Source:MGI Symbol;Acc:MGI:1913865]
ENSMUSG00000039943.16	3035.02	-0.13619	0.0625316	-2.17794	0.0294104	0.527299	ENSMUSG00000039943.16	ENSMUSG00000039943	Plcb4	2	135659011	136014593	135659011	1	phospholipase C, beta 4 [Source:MGI Symbol;Acc:MGI:107464]
ENSMUSG00000047419.5	628.451	-2.20783	1.01387	-2.17763	0.0294337	0.527299	ENSMUSG00000047419.5	ENSMUSG00000047419	Cmya5	13	93040713	93144724	93144724	-1	cardiomyopathy associated 5 [Source:MGI Symbol;Acc:MGI:1923719]
ENSMUSG00000008540.11	449.7	-0.346502	0.159133	-2.17745	0.0294474	0.527299	ENSMUSG00000008540.11	ENSMUSG00000008540	Mgst1	6	138140316	138156755	138140316	1	microsomal glutathione S-transferase 1 [Source:MGI Symbol;Acc:MGI:1913850]
ENSMUSG00000021200.14	280.738	-1.21543	0.558192	-2.17744	0.0294475	0.527299	ENSMUSG00000021200.14	ENSMUSG00000021200	Asb2	12	103321142	103356001	103356001	-1	ankyrin repeat and SOCS box-containing 2 [Source:MGI Symbol;Acc:MGI:1929743]
ENSMUSG00000031097.15	1329.78	-2.57933	1.18491	-2.17682	0.0294941	0.527614	ENSMUSG00000031097.15	ENSMUSG00000031097	Tnni2	7	142441808	142444410	142441808	1	troponin I, skeletal, fast 2 [Source:MGI Symbol;Acc:MGI:105070]
ENSMUSG00000024681.11	235.468	-0.381129	0.17513	-2.17626	0.029536	0.527844	ENSMUSG00000024681.11	ENSMUSG00000024681	Ms4a3	19	11629496	11640851	11640805	-1	membrane-spanning 4-domains, subfamily A, member 3 [Source:MGI Symbol;Acc:MGI:2158468]
ENSMUSG00000102307.1	707.195	-0.222486	0.102284	-2.17518	0.0296167	0.528647	ENSMUSG00000102307.1	ENSMUSG00000102307	Gm38194	1	195321283	195323493	195321283	1	predicted gene, 38194 [Source:MGI Symbol;Acc:MGI:5611422]
ENSMUSG00000029482.4	8324.46	0.112454	0.0517133	2.17457	0.0296625	0.528647	ENSMUSG00000029482.4	ENSMUSG00000029482	Aacs	5	125475814	125517410	125475814	1	acetoacetyl-CoA synthetase [Source:MGI Symbol;Acc:MGI:1926144]
ENSMUSG00000035215.9	900.003	-0.201605	0.0927138	-2.17449	0.0296682	0.528647	ENSMUSG00000035215.9	ENSMUSG00000035215	Lsm7	10	80852821	80855209	80855209	-1	LSM7 homolog, U6 small nuclear RNA and mRNA degradation associated [Source:MGI Symbol;Acc:MGI:1913344]
ENSMUSG00000015747.5	1369.72	0.201527	0.0927069	2.17381	0.0297195	0.529042	ENSMUSG00000015747.5	ENSMUSG00000015747	Vps45	3	95999832	96058466	96058466	-1	vacuolar protein sorting 45 [Source:MGI Symbol;Acc:MGI:891965]
ENSMUSG00000011257.19	1996.25	-0.211595	0.0973569	-2.1734	0.0297504	0.529074	ENSMUSG00000011257.19	ENSMUSG00000011257	Pabpc4	4	123262351	123298925	123262351	1	poly(A) binding protein, cytoplasmic 4 [Source:MGI Symbol;Acc:MGI:2385206]
ENSMUSG00000106518.1	4.00979	-2.84929	1.31115	-2.17312	0.0297709	NA	ENSMUSG00000106518.1	ENSMUSG00000106518	Gm42759	5	98031567	98034005	98031567	1	predicted gene 42759 [Source:MGI Symbol;Acc:MGI:5662896]
ENSMUSG00000026565.18	713.34	0.323119	0.148759	2.1721	0.0298482	0.529801	ENSMUSG00000026565.18	ENSMUSG00000026565	Pou2f1	1	165865154	166002678	166002678	-1	POU domain, class 2, transcription factor 1 [Source:MGI Symbol;Acc:MGI:101898]
ENSMUSG00000018846.8	6220.94	0.113429	0.0522213	2.17208	0.0298496	0.529801	ENSMUSG00000018846.8	ENSMUSG00000018846	Pank3	11	35769484	35791285	35769484	1	pantothenate kinase 3 [Source:MGI Symbol;Acc:MGI:2387464]
ENSMUSG00000024645.5	345.678	-0.317627	0.146329	-2.17064	0.029958	0.530252	ENSMUSG00000024645.5	ENSMUSG00000024645	Timm21	18	84946191	84951524	84951524	-1	translocase of inner mitochondrial membrane 21 [Source:MGI Symbol;Acc:MGI:1920595]
ENSMUSG00000037536.14	1614.36	-0.145628	0.0670925	-2.17055	0.0299649	0.530252	ENSMUSG00000037536.14	ENSMUSG00000037536	Fbxo34	14	47450421	47531962	47450421	1	F-box protein 34 [Source:MGI Symbol;Acc:MGI:1926188]
ENSMUSG00000027435.8	584.038	-0.290704	0.133947	-2.17029	0.0299849	0.530252	ENSMUSG00000027435.8	ENSMUSG00000027435	Cd93	2	148436640	148443563	148443563	-1	CD93 antigen [Source:MGI Symbol;Acc:MGI:106664]
ENSMUSG00000037458.15	10577.2	0.110429	0.0508842	2.1702	0.0299917	0.530252	ENSMUSG00000037458.15	ENSMUSG00000037458	Azin1	15	38487427	38519266	38519266	-1	antizyme inhibitor 1 [Source:MGI Symbol;Acc:MGI:1859169]
ENSMUSG00000030247.9	85.608	-0.588324	0.271186	-2.16945	0.0300487	0.530743	ENSMUSG00000030247.9	ENSMUSG00000030247	Kcnj8	6	142564837	142571614	142571614	-1	potassium inwardly-rectifying channel, subfamily J, member 8 [Source:MGI Symbol;Acc:MGI:1100508]
ENSMUSG00000037921.15	162.418	-0.448806	0.206989	-2.16826	0.0301388	0.531325	ENSMUSG00000037921.15	ENSMUSG00000037921	Ddx60	8	61928087	62038244	61928087	1	DEAD (Asp-Glu-Ala-Asp) box polypeptide 60 [Source:MGI Symbol;Acc:MGI:2384570]
ENSMUSG00000048251.15	590.461	0.222795	0.102754	2.16824	0.0301401	0.531325	ENSMUSG00000048251.15	ENSMUSG00000048251	Bcl11b	12	107910403	108003602	108003602	-1	B cell leukemia/lymphoma 11B [Source:MGI Symbol;Acc:MGI:1929913]
ENSMUSG00000033355.6	227.296	-0.501484	0.231351	-2.16764	0.0301863	0.531624	ENSMUSG00000033355.6	ENSMUSG00000033355	Rtp4	16	23520291	23614222	23520291	1	receptor transporter protein 4 [Source:MGI Symbol;Acc:MGI:1915025]
ENSMUSG00000030433.15	11.1077	-2.06089	0.951305	-2.16638	0.0302823	0.532522	ENSMUSG00000030433.15	ENSMUSG00000030433	Sbk2	7	4940512	4964406	4964406	-1	SH3-binding domain kinase family, member 2 [Source:MGI Symbol;Acc:MGI:2685925]
ENSMUSG00000022414.8	967.232	-0.179274	0.0827595	-2.1662	0.0302959	0.532522	ENSMUSG00000022414.8	ENSMUSG00000022414	Tab1	15	80133127	80161707	80133127	1	TGF-beta activated kinase 1/MAP3K7 binding protein 1 [Source:MGI Symbol;Acc:MGI:1913763]
ENSMUSG00000029761.16	2037.58	-0.170689	0.0788285	-2.16532	0.0303629	0.533185	ENSMUSG00000029761.16	ENSMUSG00000029761	Cald1	6	34598500	34775473	34598500	1	caldesmon 1 [Source:MGI Symbol;Acc:MGI:88250]
ENSMUSG00000020321.16	23355.1	0.11385	0.0526166	2.16377	0.0304822	0.534192	ENSMUSG00000020321.16	ENSMUSG00000020321	Mdh1	11	21556692	21572367	21572193	-1	malate dehydrogenase 1, NAD (soluble) [Source:MGI Symbol;Acc:MGI:97051]
ENSMUSG00000034614.14	4162.47	0.123414	0.0570785	2.16218	0.0306047	0.534192	ENSMUSG00000034614.14	ENSMUSG00000034614	Pik3ip1	11	3330401	3342971	3330401	1	phosphoinositide-3-kinase interacting protein 1 [Source:MGI Symbol;Acc:MGI:1917016]
ENSMUSG00000085779.1	10.6335	-2.27912	1.05414	-2.16206	0.0306132	0.534192	ENSMUSG00000085779.1	ENSMUSG00000085779	Atcayos	10	81194609	81210877	81194609	1	ataxia, cerebellar, Cayman type, opposite strand [Source:MGI Symbol;Acc:MGI:1916928]
ENSMUSG00000040287.9	82.3533	-2.02519	0.936698	-2.16205	0.0306144	0.534192	ENSMUSG00000040287.9	ENSMUSG00000040287	Stac3	10	127501686	127508823	127501686	1	SH3 and cysteine rich domain 3 [Source:MGI Symbol;Acc:MGI:3606571]
ENSMUSG00000048148.18	974.411	-0.22754	0.105244	-2.16203	0.0306158	0.534192	ENSMUSG00000048148.18	ENSMUSG00000048148	Nwd1	8	72646711	72717876	72646711	1	NACHT and WD repeat domain containing 1 [Source:MGI Symbol;Acc:MGI:2442268]
ENSMUSG00000024268.16	5780.39	0.110489	0.0511088	2.16184	0.0306308	0.534192	ENSMUSG00000024268.16	ENSMUSG00000024268	Celf4	18	25477632	25754157	25753750	-1	CUGBP, Elav-like family member 4 [Source:MGI Symbol;Acc:MGI:1932407]
ENSMUSG00000055407.14	15745	-0.0849845	0.0393147	-2.16165	0.0306453	0.534192	ENSMUSG00000055407.14	ENSMUSG00000055407	Map6	7	99267447	99337137	99267447	1	microtubule-associated protein 6 [Source:MGI Symbol;Acc:MGI:1201690]
ENSMUSG00000052551.16	44.6938	-1.14182	0.52825	-2.16152	0.0306554	0.534192	ENSMUSG00000052551.16	ENSMUSG00000052551	Adarb2	13	8202866	8768747	8202866	1	adenosine deaminase, RNA-specific, B2 [Source:MGI Symbol;Acc:MGI:2151118]
ENSMUSG00000018042.18	16995.7	0.0912986	0.0422553	2.16064	0.0307229	0.534592	ENSMUSG00000018042.18	ENSMUSG00000018042	Cyb5r3	15	83153494	83172592	83170177	-1	cytochrome b5 reductase 3 [Source:MGI Symbol;Acc:MGI:94893]
ENSMUSG00000048799.8	6948.25	0.115214	0.0533284	2.16046	0.0307372	0.534592	ENSMUSG00000048799.8	ENSMUSG00000048799	Cep120	18	53681723	53744608	53744547	-1	centrosomal protein 120 [Source:MGI Symbol;Acc:MGI:2147298]
ENSMUSG00000034055.16	1897.99	-0.240867	0.111513	-2.15999	0.0307733	0.534708	ENSMUSG00000034055.16	ENSMUSG00000034055	Phka1	X	102513975	102644246	102644246	-1	phosphorylase kinase alpha 1 [Source:MGI Symbol;Acc:MGI:97576]
ENSMUSG00000025402.12	729.979	0.243219	0.112635	2.15935	0.0308232	0.534893	ENSMUSG00000025402.12	ENSMUSG00000025402	Nab2	10	127660918	127668568	127666710	-1	Ngfi-A binding protein 2 [Source:MGI Symbol;Acc:MGI:107563]
ENSMUSG00000039617.8	276.368	0.37045	0.171646	2.15823	0.0309103	0.534893	ENSMUSG00000039617.8	ENSMUSG00000039617	Gm7488	3	21049565	21050248	21049565	1	predicted gene 7488 [Source:MGI Symbol;Acc:MGI:3647006]
ENSMUSG00000049728.14	617.603	-0.213005	0.0986997	-2.15811	0.0309191	0.534893	ENSMUSG00000049728.14	ENSMUSG00000049728	Zfp668	7	127863047	127876828	127876828	-1	zinc finger protein 668 [Source:MGI Symbol;Acc:MGI:2442943]
ENSMUSG00000021290.6	3571.77	-0.123413	0.0571918	-2.15788	0.0309369	0.534893	ENSMUSG00000021290.6	ENSMUSG00000021290	Atp5mpl	12	111961375	111966977	111962708	-1	ATP synthase membrane subunit 6.8PL [Source:MGI Symbol;Acc:MGI:1917507]
ENSMUSG00000029364.15	10659.3	-0.111997	0.0519062	-2.15769	0.0309523	0.534893	ENSMUSG00000029364.15	ENSMUSG00000029364	Wsb2	5	117357304	117378601	117357304	1	WD repeat and SOCS box-containing 2 [Source:MGI Symbol;Acc:MGI:2144041]
ENSMUSG00000071659.4	10288.8	0.0836429	0.0387705	2.15738	0.0309758	0.534893	ENSMUSG00000071659.4	ENSMUSG00000071659	Hnrnpul2	19	8820010	8834143	8820010	1	heterogeneous nuclear ribonucleoprotein U-like 2 [Source:MGI Symbol;Acc:MGI:1915943]
ENSMUSG00000041220.10	7378.11	0.0940551	0.0436046	2.157	0.0310058	0.534893	ENSMUSG00000041220.10	ENSMUSG00000041220	Elovl6	3	129532355	129638495	129532355	1	ELOVL family member 6, elongation of long chain fatty acids (yeast) [Source:MGI Symbol;Acc:MGI:2156528]
ENSMUSG00000022199.12	8933.78	0.0940423	0.0436041	2.15673	0.0310268	0.534893	ENSMUSG00000022199.12	ENSMUSG00000022199	Slc22a17	14	54906304	54913132	54913103	-1	solute carrier family 22 (organic cation transporter), member 17 [Source:MGI Symbol;Acc:MGI:1926225]
ENSMUSG00000025758.10	345.482	0.396074	0.18367	2.15645	0.0310488	0.534893	ENSMUSG00000025758.10	ENSMUSG00000025758	Plk4	3	40800019	40816883	40800019	1	polo like kinase 4 [Source:MGI Symbol;Acc:MGI:101783]
ENSMUSG00000035513.19	2343.33	0.130795	0.0606789	2.15553	0.0311206	0.535622	ENSMUSG00000035513.19	ENSMUSG00000035513	Ntng2	2	29194541	29253005	29248125	-1	netrin G2 [Source:MGI Symbol;Acc:MGI:2159341]
ENSMUSG00000020668.10	21668	0.0797766	0.0370189	2.15502	0.03116	0.535665	ENSMUSG00000020668.10	ENSMUSG00000020668	Kif3c	12	3365132	3406494	3365132	1	kinesin family member 3C [Source:MGI Symbol;Acc:MGI:107979]
ENSMUSG00000026568.6	2337.44	-0.2015	0.0935148	-2.15474	0.031182	0.535665	ENSMUSG00000026568.6	ENSMUSG00000026568	Mpc2	1	165460637	165481214	165460637	1	mitochondrial pyruvate carrier 2 [Source:MGI Symbol;Acc:MGI:1917706]
ENSMUSG00000021147.17	3912.62	0.108929	0.0505876	2.15327	0.0312977	0.537144	ENSMUSG00000021147.17	ENSMUSG00000021147	Wdr37	13	8802968	8871909	8871044	-1	WD repeat domain 37 [Source:MGI Symbol;Acc:MGI:1920393]
ENSMUSG00000059201.12	12.667	2.02513	0.940765	2.15264	0.0313467	0.537166	ENSMUSG00000059201.12	ENSMUSG00000059201	Lep	6	29060220	29073877	29060220	1	leptin [Source:MGI Symbol;Acc:MGI:104663]
ENSMUSG00000048285.9	1615.59	-0.220096	0.10227	-2.15211	0.031389	0.537166	ENSMUSG00000048285.9	ENSMUSG00000048285	Frmd6	12	70825514	70902234	70825514	1	FERM domain containing 6 [Source:MGI Symbol;Acc:MGI:2442579]
ENSMUSG00000112640.1	246.796	0.427078	0.198452	2.15205	0.0313935	0.537166	ENSMUSG00000112640.1	ENSMUSG00000112640	Gm32687	10	81863934	81881081	81863934	1	predicted gene, 32687 [Source:MGI Symbol;Acc:MGI:5591846]
ENSMUSG00000022724.15	554.428	0.229677	0.10683	2.14994	0.0315598	0.537166	ENSMUSG00000022724.15	ENSMUSG00000022724	Riox2	16	59471775	59492461	59471775	1	ribosomal oxygenase 2 [Source:MGI Symbol;Acc:MGI:1914264]
ENSMUSG00000039883.5	123.663	0.516325	0.240167	2.14986	0.0315663	0.537166	ENSMUSG00000039883.5	ENSMUSG00000039883	Lrrc17	5	21543559	21575904	21543559	1	leucine rich repeat containing 17 [Source:MGI Symbol;Acc:MGI:1921761]
ENSMUSG00000021830.14	2895.41	0.124165	0.0577742	2.14913	0.0316239	0.537166	ENSMUSG00000021830.14	ENSMUSG00000021830	Txndc16	14	45133465	45220328	45219425	-1	thioredoxin domain containing 16 [Source:MGI Symbol;Acc:MGI:1917811]
ENSMUSG00000054091.9	1265.75	-0.159627	0.0742754	-2.14913	0.0316243	0.537166	ENSMUSG00000054091.9	ENSMUSG00000054091	1810037I17Rik	3	122924203	122926184	122924203	1	RIKEN cDNA 1810037I17 gene [Source:MGI Symbol;Acc:MGI:1914954]
ENSMUSG00000028211.11	1006.65	0.201758	0.093923	2.14812	0.0317041	0.537166	ENSMUSG00000028211.11	ENSMUSG00000028211	Trp53inp1	4	11156431	11174379	11156431	1	transformation related protein 53 inducible nuclear protein 1 [Source:MGI Symbol;Acc:MGI:1926609]
ENSMUSG00000054978.3	8.58354	-2.26242	1.05324	-2.14806	0.031709	0.537166	ENSMUSG00000054978.3	ENSMUSG00000054978	Kbtbd13	9	65388684	65391652	65391652	-1	kelch repeat and BTB (POZ) domain containing 13 [Source:MGI Symbol;Acc:MGI:1921742]
ENSMUSG00000002825.8	235.491	-0.329666	0.153483	-2.1479	0.0317213	0.537166	ENSMUSG00000002825.8	ENSMUSG00000002825	Qtrt1	9	21411837	21420274	21411837	1	queuine tRNA-ribosyltransferase catalytic subunit 1 [Source:MGI Symbol;Acc:MGI:1931441]
ENSMUSG00000052684.4	5362.23	0.104713	0.0487571	2.14765	0.0317413	0.537166	ENSMUSG00000052684.4	ENSMUSG00000052684	Jun	4	95049034	95052222	95052222	-1	jun proto-oncogene [Source:MGI Symbol;Acc:MGI:96646]
ENSMUSG00000097487.7	25.7825	-1.54811	0.720891	-2.14749	0.031754	0.537166	ENSMUSG00000097487.7	ENSMUSG00000097487	Ptges3l	11	101418812	101425333	101424669	-1	prostaglandin E synthase 3 like [Source:MGI Symbol;Acc:MGI:1916146]
ENSMUSG00000022546.5	167.77	-0.420215	0.195678	-2.14748	0.0317548	0.537166	ENSMUSG00000022546.5	ENSMUSG00000022546	Gpt	15	76695716	76699686	76695716	1	glutamic pyruvic transaminase, soluble [Source:MGI Symbol;Acc:MGI:95802]
ENSMUSG00000064354.1	104133	-0.484431	0.22559	-2.14739	0.0317621	0.537166	ENSMUSG00000064354.1	ENSMUSG00000064354	mt-Co2	MT	7013	7696	7013	1	mitochondrially encoded cytochrome c oxidase II [Source:MGI Symbol;Acc:MGI:102503]
ENSMUSG00000025153.9	21277.4	0.129662	0.0603836	2.1473	0.0317691	0.537166	ENSMUSG00000025153.9	ENSMUSG00000025153	Fasn	11	120805846	120824547	120824547	-1	fatty acid synthase [Source:MGI Symbol;Acc:MGI:95485]
ENSMUSG00000026042.16	1962.54	-0.166227	0.0774209	-2.14706	0.0317886	0.537166	ENSMUSG00000026042.16	ENSMUSG00000026042	Col5a2	1	45374321	45503282	45503282	-1	collagen, type V, alpha 2 [Source:MGI Symbol;Acc:MGI:88458]
ENSMUSG00000018381.15	63.7696	-0.723919	0.337193	-2.1469	0.0318014	0.537166	ENSMUSG00000018381.15	ENSMUSG00000018381	Abi3	11	95830074	95842476	95842409	-1	ABI gene family, member 3 [Source:MGI Symbol;Acc:MGI:1913860]
ENSMUSG00000042190.12	105.607	-0.604725	0.281768	-2.14618	0.0318587	0.537486	ENSMUSG00000042190.12	ENSMUSG00000042190	Cmklr1	5	113612354	113650426	113650426	-1	chemokine-like receptor 1 [Source:MGI Symbol;Acc:MGI:109603]
ENSMUSG00000000308.14	12455.1	0.129024	0.0601328	2.14566	0.0319003	0.537486	ENSMUSG00000000308.14	ENSMUSG00000000308	Ckmt1	2	121357714	121363737	121357714	1	creatine kinase, mitochondrial 1, ubiquitous [Source:MGI Symbol;Acc:MGI:99441]
ENSMUSG00000097164.2	1293.76	0.166489	0.0775972	2.14555	0.0319091	0.537486	ENSMUSG00000097164.2	ENSMUSG00000097164	Cep83os	10	94671025	94688576	94688576	-1	centrosomal protein 83, opposite strand [Source:MGI Symbol;Acc:MGI:1914973]
ENSMUSG00000048478.7	190.7	0.401004	0.187028	2.14409	0.0320258	0.538409	ENSMUSG00000048478.7	ENSMUSG00000048478	Spata33	8	123212832	123222046	123212832	1	spermatogenesis associated 33 [Source:MGI Symbol;Acc:MGI:2444920]
ENSMUSG00000031109.16	977.509	-0.242445	0.11308	-2.14401	0.0320318	0.538409	ENSMUSG00000031109.16	ENSMUSG00000031109	Enox2	X	49009707	49288259	49288212	-1	ecto-NOX disulfide-thiol exchanger 2 [Source:MGI Symbol;Acc:MGI:2384799]
ENSMUSG00000010476.14	4501.59	0.165083	0.0770065	2.14375	0.0320528	0.538409	ENSMUSG00000010476.14	ENSMUSG00000010476	Ebf3	7	137193673	137314445	137314445	-1	early B cell factor 3 [Source:MGI Symbol;Acc:MGI:894289]
ENSMUSG00000051747.15	1366.39	-2.40156	1.12047	-2.14335	0.0320848	0.53845	ENSMUSG00000051747.15	ENSMUSG00000051747	Ttn	2	76703980	76982547	76982455	-1	titin [Source:MGI Symbol;Acc:MGI:98864]
ENSMUSG00000047731.17	2212.41	-0.137187	0.0640179	-2.14296	0.0321167	0.538471	ENSMUSG00000047731.17	ENSMUSG00000047731	Wbp1l	19	46599084	46657389	46599084	1	WW domain binding protein 1 like [Source:MGI Symbol;Acc:MGI:107577]
ENSMUSG00000032202.11	1337.59	-0.188304	0.0879028	-2.14219	0.0321784	0.538471	ENSMUSG00000032202.11	ENSMUSG00000032202	Rab27a	9	73044854	73097629	73044854	1	RAB27A, member RAS oncogene family [Source:MGI Symbol;Acc:MGI:1861441]
ENSMUSG00000025544.13	10240.6	0.107211	0.050051	2.14203	0.0321914	0.538471	ENSMUSG00000025544.13	ENSMUSG00000025544	Tm9sf2	14	122107038	122159604	122107038	1	transmembrane 9 superfamily member 2 [Source:MGI Symbol;Acc:MGI:1915309]
ENSMUSG00000025348.9	8235.7	-0.117358	0.0548017	-2.1415	0.0322335	0.538471	ENSMUSG00000025348.9	ENSMUSG00000025348	Itga7	10	128933818	128958282	128933818	1	integrin alpha 7 [Source:MGI Symbol;Acc:MGI:102700]
ENSMUSG00000027692.16	2940.24	0.12284	0.0573807	2.14079	0.0322906	0.538471	ENSMUSG00000027692.16	ENSMUSG00000027692	Tnik	3	28263214	28675858	28263214	1	TRAF2 and NCK interacting kinase [Source:MGI Symbol;Acc:MGI:1916264]
ENSMUSG00000073676.4	2301.53	-0.192162	0.0897701	-2.1406	0.032306	0.538471	ENSMUSG00000073676.4	ENSMUSG00000073676	Hspe1	1	55088132	55091307	55088132	1	heat shock protein 1 (chaperonin 10) [Source:MGI Symbol;Acc:MGI:104680]
ENSMUSG00000061723.18	3282.46	-2.56775	1.19969	-2.14034	0.0323271	0.538471	ENSMUSG00000061723.18	ENSMUSG00000061723	Tnnt3	7	142498836	142516009	142498836	1	troponin T3, skeletal, fast [Source:MGI Symbol;Acc:MGI:109550]
ENSMUSG00000050954.15	216.032	0.469798	0.219499	2.14032	0.0323289	0.538471	ENSMUSG00000050954.15	ENSMUSG00000050954	Zfp169	13	48487647	48513451	48513436	-1	zinc finger protein 169 [Source:MGI Symbol;Acc:MGI:1915161]
ENSMUSG00000031379.13	1228.11	0.190156	0.088857	2.14003	0.0323527	0.538471	ENSMUSG00000031379.13	ENSMUSG00000031379	Pir	X	164269371	164373011	164269371	1	pirin [Source:MGI Symbol;Acc:MGI:1916906]
ENSMUSG00000041078.7	903.679	-0.254779	0.119118	-2.13887	0.0324464	0.539536	ENSMUSG00000041078.7	ENSMUSG00000041078	Grid1	14	34820108	35583379	34820108	1	glutamate receptor, ionotropic, delta 1 [Source:MGI Symbol;Acc:MGI:95812]
ENSMUSG00000106404.1	1.87507	-4.38392	2.05028	-2.1382	0.0325003	NA	ENSMUSG00000106404.1	ENSMUSG00000106404	Gm42919	5	48802728	48804011	48804011	-1	predicted gene 42919 [Source:MGI Symbol;Acc:MGI:5663056]
ENSMUSG00000006345.10	25.3678	-1.05828	0.49526	-2.13682	0.0326125	0.540452	ENSMUSG00000006345.10	ENSMUSG00000006345	Ggt1	10	75561604	75586200	75568656	1	gamma-glutamyltransferase 1 [Source:MGI Symbol;Acc:MGI:95706]
ENSMUSG00000058546.8	6460.08	-0.110373	0.0516591	-2.13657	0.0326328	0.540452	ENSMUSG00000058546.8	ENSMUSG00000058546	Rpl23a	11	78180932	78183584	78183077	-1	ribosomal protein L23A [Source:MGI Symbol;Acc:MGI:3040672]
ENSMUSG00000102627.1	718.878	0.279116	0.130638	2.13655	0.0326342	0.540452	ENSMUSG00000102627.1	ENSMUSG00000102627	Snurf	7	59995449	60005049	60005049	-1	SNRPN upstream reading frame [Source:MGI Symbol;Acc:MGI:1891236]
ENSMUSG00000053119.11	11617.2	0.0909266	0.0425604	2.13641	0.0326459	0.540452	ENSMUSG00000053119.11	ENSMUSG00000053119	Chmp3	6	71543797	71582609	71543797	1	charged multivesicular body protein 3 [Source:MGI Symbol;Acc:MGI:1913950]
ENSMUSG00000009112.4	4404	0.169261	0.0792463	2.13589	0.0326884	0.540452	ENSMUSG00000009112.4	ENSMUSG00000009112	Bcl2l13	6	120836212	120892842	120836212	1	BCL2-like 13 (apoptosis facilitator) [Source:MGI Symbol;Acc:MGI:2136959]
ENSMUSG00000020650.15	2163.3	0.130968	0.0613252	2.13563	0.0327095	0.540452	ENSMUSG00000020650.15	ENSMUSG00000020650	Bcap29	12	31590967	31634658	31634635	-1	B cell receptor associated protein 29 [Source:MGI Symbol;Acc:MGI:101917]
ENSMUSG00000028156.12	4275.93	-0.159005	0.0744533	-2.13563	0.0327096	0.540452	ENSMUSG00000028156.12	ENSMUSG00000028156	Eif4e	3	138526179	138559696	138526179	1	eukaryotic translation initiation factor 4E [Source:MGI Symbol;Acc:MGI:95305]
ENSMUSG00000103749.1	270.857	0.301393	0.141165	2.13503	0.0327582	0.540763	ENSMUSG00000103749.1	ENSMUSG00000103749	Pcdhgb5	18	37731009	37841873	37731009	1	protocadherin gamma subfamily B, 5 [Source:MGI Symbol;Acc:MGI:1935196]
ENSMUSG00000024952.13	1930.65	0.143053	0.0670377	2.13391	0.0328498	0.541583	ENSMUSG00000024952.13	ENSMUSG00000024952	Rps6ka4	19	6829085	6840636	6840636	-1	ribosomal protein S6 kinase, polypeptide 4 [Source:MGI Symbol;Acc:MGI:1930076]
ENSMUSG00000048731.15	30.7138	-0.918344	0.430446	-2.13347	0.0328861	0.541583	ENSMUSG00000048731.15	ENSMUSG00000048731	Ggnbp1	17	27017987	27037624	27017987	1	gametogenetin binding protein 1 [Source:MGI Symbol;Acc:MGI:3055306]
ENSMUSG00000043013.10	491.606	0.271662	0.127342	2.13334	0.0328973	0.541583	ENSMUSG00000043013.10	ENSMUSG00000043013	Onecut1	9	74861921	74891781	74861921	1	one cut domain, family member 1 [Source:MGI Symbol;Acc:MGI:1196423]
ENSMUSG00000001604.14	77.9313	-0.859749	0.403245	-2.13208	0.0330006	0.542792	ENSMUSG00000001604.14	ENSMUSG00000001604	Tcea3	4	136247729	136274898	136247729	1	transcription elongation factor A (SII), 3 [Source:MGI Symbol;Acc:MGI:1196908]
ENSMUSG00000045868.12	203.706	-0.674744	0.316646	-2.13091	0.0330962	0.543404	ENSMUSG00000045868.12	ENSMUSG00000045868	Gvin1	7	106156556	106215326	106215310	-1	GTPase, very large interferon inducible 1 [Source:MGI Symbol;Acc:MGI:1921808]
ENSMUSG00000029594.12	759.868	0.280884	0.131856	2.13023	0.0331528	0.543404	ENSMUSG00000029594.12	ENSMUSG00000029594	Rbm19	5	120116465	120198981	120116465	1	RNA binding motif protein 19 [Source:MGI Symbol;Acc:MGI:1921361]
ENSMUSG00000026247.13	85.8255	-1.72063	0.807755	-2.13014	0.0331598	0.543404	ENSMUSG00000026247.13	ENSMUSG00000026247	Ecel1	1	87147655	87156521	87156521	-1	endothelin converting enzyme-like 1 [Source:MGI Symbol;Acc:MGI:1343461]
ENSMUSG00000062980.15	573.731	-0.258447	0.12133	-2.13011	0.0331625	0.543404	ENSMUSG00000062980.15	ENSMUSG00000062980	Cped1	6	21985916	22256404	21985916	1	cadherin-like and PC-esterase domain containing 1 [Source:MGI Symbol;Acc:MGI:2444814]
ENSMUSG00000056812.14	7047.69	-0.0949757	0.0445935	-2.12981	0.0331873	0.543404	ENSMUSG00000056812.14	ENSMUSG00000056812	St8sia3	18	64254359	64279611	64254359	1	ST8 alpha-N-acetyl-neuraminide alpha-2,8-sialyltransferase 3 [Source:MGI Symbol;Acc:MGI:106019]
ENSMUSG00000051435.11	47.6189	0.799412	0.375566	2.12855	0.0332915	0.544316	ENSMUSG00000051435.11	ENSMUSG00000051435	Fhad1	4	141890438	142015082	142015067	-1	forkhead-associated (FHA) phosphopeptide binding domain 1 [Source:MGI Symbol;Acc:MGI:1920323]
ENSMUSG00000026407.17	292.186	-2.51891	1.18347	-2.12841	0.0333029	0.544316	ENSMUSG00000026407.17	ENSMUSG00000026407	Cacna1s	1	136052750	136119822	136052750	1	calcium channel, voltage-dependent, L type, alpha 1S subunit [Source:MGI Symbol;Acc:MGI:88294]
ENSMUSG00000024211.15	973.523	0.183285	0.0861497	2.12752	0.033377	0.544888	ENSMUSG00000024211.15	ENSMUSG00000024211	Grm8	6	27275119	28135178	28134545	-1	glutamate receptor, metabotropic 8 [Source:MGI Symbol;Acc:MGI:1351345]
ENSMUSG00000019039.14	1620.67	-0.184716	0.0868414	-2.12705	0.0334159	0.544888	ENSMUSG00000019039.14	ENSMUSG00000019039	Dalrd3	9	108569886	108572774	108569886	1	DALR anticodon binding domain containing 3 [Source:MGI Symbol;Acc:MGI:1915039]
ENSMUSG00000004730.15	189.968	-0.403679	0.189796	-2.12691	0.0334278	0.544888	ENSMUSG00000004730.15	ENSMUSG00000004730	Adgre1	17	57358691	57483527	57358691	1	adhesion G protein-coupled receptor E1 [Source:MGI Symbol;Acc:MGI:106912]
ENSMUSG00000093909.2	3.2118	-5.14919	2.42215	-2.12588	0.0335134	NA	ENSMUSG00000093909.2	ENSMUSG00000093909	Gm3883	4	42456965	42461867	42456965	1	predicted gene 3883 [Source:MGI Symbol;Acc:MGI:3823028]
ENSMUSG00000018750.14	11937.8	0.11259	0.0529646	2.12577	0.0335228	0.545854	ENSMUSG00000018750.14	ENSMUSG00000018750	Zbtb4	11	69765912	69784023	69765912	1	zinc finger and BTB domain containing 4 [Source:MGI Symbol;Acc:MGI:1922830]
ENSMUSG00000040596.15	3645.5	-0.115859	0.0545095	-2.12547	0.0335471	0.545854	ENSMUSG00000040596.15	ENSMUSG00000040596	Pogk	1	166384622	166409863	166409782	-1	pogo transposable element with KRAB domain [Source:MGI Symbol;Acc:MGI:1918842]
ENSMUSG00000051451.6	2438.68	-0.133353	0.0627513	-2.1251	0.033578	0.545868	ENSMUSG00000051451.6	ENSMUSG00000051451	Crebzf	7	90442729	90447994	90442729	1	CREB/ATF bZIP transcription factor [Source:MGI Symbol;Acc:MGI:2675296]
ENSMUSG00000061524.8	139.111	-0.563887	0.265433	-2.12441	0.033636	0.545957	ENSMUSG00000061524.8	ENSMUSG00000061524	Zic2	14	122475435	122479852	122475435	1	zinc finger protein of the cerebellum 2 [Source:MGI Symbol;Acc:MGI:106679]
ENSMUSG00000050377.8	1252.08	-0.161707	0.0761217	-2.12432	0.0336436	0.545957	ENSMUSG00000050377.8	ENSMUSG00000050377	Il31ra	13	112519898	112594360	112594360	-1	interleukin 31 receptor A [Source:MGI Symbol;Acc:MGI:2180511]
ENSMUSG00000042808.8	149.128	0.426234	0.200826	2.1224	0.0338039	0.548069	ENSMUSG00000042808.8	ENSMUSG00000042808	Gpx2	12	76792333	76795554	76795497	-1	glutathione peroxidase 2 [Source:MGI Symbol;Acc:MGI:106609]
ENSMUSG00000079157.4	1238.2	0.1579	0.0744142	2.1219	0.0338457	0.548259	ENSMUSG00000079157.4	ENSMUSG00000079157	Fam155a	8	9205902	9771161	9771161	-1	family with sequence similarity 155, member A [Source:MGI Symbol;Acc:MGI:2142765]
ENSMUSG00000028771.13	1784.82	-0.165672	0.0781158	-2.12086	0.033934	0.548464	ENSMUSG00000028771.13	ENSMUSG00000028771	Ptpn12	5	20986645	21055911	21055911	-1	protein tyrosine phosphatase, non-receptor type 12 [Source:MGI Symbol;Acc:MGI:104673]
ENSMUSG00000026576.12	75179.6	0.100174	0.0472333	2.12083	0.0339365	0.548464	ENSMUSG00000026576.12	ENSMUSG00000026576	Atp1b1	1	164437109	164458355	164458355	-1	ATPase, Na+/K+ transporting, beta 1 polypeptide [Source:MGI Symbol;Acc:MGI:88108]
ENSMUSG00000110275.1	2.01712	4.4146	2.08209	2.12027	0.033983	NA	ENSMUSG00000110275.1	ENSMUSG00000110275	Gm5905	7	141177885	141178464	141178464	-1	predicted gene 5905 [Source:MGI Symbol;Acc:MGI:3647422]
ENSMUSG00000041617.10	1870.04	-0.147356	0.069504	-2.12011	0.0339969	0.548464	ENSMUSG00000041617.10	ENSMUSG00000041617	Ccdc74a	16	17646470	17650738	17646470	1	coiled-coil domain containing 74A [Source:MGI Symbol;Acc:MGI:1919565]
ENSMUSG00000038524.13	1274.21	0.158954	0.0749748	2.1201	0.0339976	0.548464	ENSMUSG00000038524.13	ENSMUSG00000038524	Fchsd1	18	37957431	37969774	37960471	-1	FCH and double SH3 domains 1 [Source:MGI Symbol;Acc:MGI:2441771]
ENSMUSG00000056917.13	645.658	-0.2157	0.101767	-2.11955	0.0340437	0.548464	ENSMUSG00000056917.13	ENSMUSG00000056917	Sipa1	19	5651185	5663707	5663680	-1	signal-induced proliferation associated gene 1 [Source:MGI Symbol;Acc:MGI:107576]
ENSMUSG00000060519.11	337.765	-0.314863	0.14857	-2.11929	0.0340657	0.548464	ENSMUSG00000060519.11	ENSMUSG00000060519	Tor3a	1	156653617	156674356	156674325	-1	torsin family 3, member A [Source:MGI Symbol;Acc:MGI:1353652]
ENSMUSG00000037608.16	3599.1	-0.117238	0.0553207	-2.11925	0.0340696	0.548464	ENSMUSG00000037608.16	ENSMUSG00000037608	Bclaf1	10	20312469	20344613	20312472	1	BCL2-associated transcription factor 1 [Source:MGI Symbol;Acc:MGI:1917580]
ENSMUSG00000008668.15	4540.5	-0.123544	0.0583336	-2.11789	0.0341846	0.549827	ENSMUSG00000008668.15	ENSMUSG00000008668	Rps18	17	33951999	33956001	33952689	-1	ribosomal protein S18 [Source:MGI Symbol;Acc:MGI:98146]
ENSMUSG00000027488.12	1323.26	-0.186074	0.0878742	-2.1175	0.0342176	0.549872	ENSMUSG00000027488.12	ENSMUSG00000027488	Snta1	2	154376313	154408099	154408099	-1	syntrophin, acidic 1 [Source:MGI Symbol;Acc:MGI:101772]
ENSMUSG00000054871.5	5240.73	0.17162	0.08113	2.11537	0.0343983	0.551272	ENSMUSG00000054871.5	ENSMUSG00000054871	Tmem158	9	123259053	123260764	123260764	-1	transmembrane protein 158 [Source:MGI Symbol;Acc:MGI:1919559]
ENSMUSG00000072494.7	1037.04	-0.168855	0.0798275	-2.11525	0.034409	0.551272	ENSMUSG00000072494.7	ENSMUSG00000072494	Ppp1r3e	14	54872669	54877550	54873312	-1	protein phosphatase 1, regulatory subunit 3E [Source:MGI Symbol;Acc:MGI:2145790]
ENSMUSG00000070645.5	2.71983	-3.89197	1.83998	-2.11522	0.034411	NA	ENSMUSG00000070645.5	ENSMUSG00000070645	Ren1	1	133350510	133360325	133350510	1	renin 1 structural [Source:MGI Symbol;Acc:MGI:97898]
ENSMUSG00000032743.15	1028.19	-0.235255	0.111242	-2.11481	0.0344462	0.551272	ENSMUSG00000032743.15	ENSMUSG00000032743	D430042O09Rik	7	125707888	125874793	125707888	1	RIKEN cDNA D430042O09 gene [Source:MGI Symbol;Acc:MGI:2442760]
ENSMUSG00000060791.15	41.9176	-0.83035	0.392683	-2.11455	0.0344679	0.551272	ENSMUSG00000060791.15	ENSMUSG00000060791	Gmfg	7	28437447	28448233	28437447	1	glia maturation factor, gamma [Source:MGI Symbol;Acc:MGI:1927135]
ENSMUSG00000031701.6	8961.04	0.106166	0.0502181	2.11409	0.0345078	0.551272	ENSMUSG00000031701.6	ENSMUSG00000031701	Dnaja2	8	85537633	85555344	85555344	-1	DnaJ heat shock protein family (Hsp40) member A2 [Source:MGI Symbol;Acc:MGI:1931882]
ENSMUSG00000014353.15	3211.26	0.124901	0.0590861	2.11389	0.0345249	0.551272	ENSMUSG00000014353.15	ENSMUSG00000014353	Tmem87b	2	128818118	128854261	128818118	1	transmembrane protein 87B [Source:MGI Symbol;Acc:MGI:1919727]
ENSMUSG00000028389.12	559.356	-0.214496	0.101499	-2.11327	0.0345775	0.551272	ENSMUSG00000028389.12	ENSMUSG00000028389	Zfp37	4	62189540	62231047	62208446	-1	zinc finger protein 37 [Source:MGI Symbol;Acc:MGI:99181]
ENSMUSG00000070604.5	204.179	-0.400884	0.189699	-2.11326	0.0345781	0.551272	ENSMUSG00000070604.5	ENSMUSG00000070604	Vsig10l	7	43463151	43472019	43463151	1	V-set and immunoglobulin domain containing 10 like [Source:MGI Symbol;Acc:MGI:1922940]
ENSMUSG00000028551.14	139.73	-0.487114	0.230532	-2.113	0.0346011	0.551272	ENSMUSG00000028551.14	ENSMUSG00000028551	Cdkn2c	4	109660876	109667189	109667189	-1	cyclin dependent kinase inhibitor 2C [Source:MGI Symbol;Acc:MGI:105388]
ENSMUSG00000073434.12	176.936	0.438267	0.207423	2.11291	0.0346081	0.551272	ENSMUSG00000073434.12	ENSMUSG00000073434	Wdr90	17	25844771	25861501	25861383	-1	WD repeat domain 90 [Source:MGI Symbol;Acc:MGI:1921267]
ENSMUSG00000082691.6	3.26034	5.10541	2.41672	2.11254	0.0346403	NA	ENSMUSG00000082691.6	ENSMUSG00000082691	Dynlt1-ps1	6	135349408	135349749	135349749	-1	dynein light chain Tctex-type 1, pseuodogene 1 [Source:MGI Symbol;Acc:MGI:3642625]
ENSMUSG00000074129.14	11594.1	-0.171063	0.0809795	-2.11243	0.0346499	0.551455	ENSMUSG00000074129.14	ENSMUSG00000074129	Rpl13a	7	45125558	45128761	45128761	-1	ribosomal protein L13A [Source:MGI Symbol;Acc:MGI:1351455]
ENSMUSG00000030956.15	1875.46	0.175646	0.0831669	2.11197	0.0346893	0.5516	ENSMUSG00000030956.15	ENSMUSG00000030956	Fam53b	7	132712082	132813886	132813528	-1	family with sequence similarity 53, member B [Source:MGI Symbol;Acc:MGI:1925188]
ENSMUSG00000072674.10	418.521	-0.289785	0.137245	-2.11144	0.0347341	0.551705	ENSMUSG00000072674.10	ENSMUSG00000072674	Plac9b	14	26167405	26182480	26182480	-1	placenta specific 9b [Source:MGI Symbol;Acc:MGI:3711222]
ENSMUSG00000013523.13	1321.92	-0.281591	0.133381	-2.11118	0.0347566	0.551705	ENSMUSG00000013523.13	ENSMUSG00000013523	Bcas1	2	170346991	170427845	170406509	-1	breast carcinoma amplified sequence 1 [Source:MGI Symbol;Acc:MGI:1924210]
ENSMUSG00000041762.16	3323.39	0.153413	0.0727072	2.11002	0.034857	0.552514	ENSMUSG00000041762.16	ENSMUSG00000041762	Gpr155	2	73341506	73386572	73386572	-1	G protein-coupled receptor 155 [Source:MGI Symbol;Acc:MGI:1915776]
ENSMUSG00000055471.7	138.396	-0.531002	0.251687	-2.10977	0.0348785	0.552514	ENSMUSG00000055471.7	ENSMUSG00000055471	Alk	17	71868972	72604627	72603827	-1	anaplastic lymphoma kinase [Source:MGI Symbol;Acc:MGI:103305]
ENSMUSG00000032648.14	1377.09	-2.31764	1.09865	-2.10953	0.0348988	0.552514	ENSMUSG00000032648.14	ENSMUSG00000032648	Pygm	19	6384399	6398459	6384399	1	muscle glycogen phosphorylase [Source:MGI Symbol;Acc:MGI:97830]
ENSMUSG00000038664.16	11021.1	0.149985	0.0711638	2.1076	0.0350655	0.55467	ENSMUSG00000038664.16	ENSMUSG00000038664	Herc1	9	66350450	66508775	66350526	1	HECT and RLD domain containing E3 ubiquitin protein ligase family member 1 [Source:MGI Symbol;Acc:MGI:2384589]
ENSMUSG00000032501.9	707.337	0.239584	0.113729	2.10662	0.0351508	0.554904	ENSMUSG00000032501.9	ENSMUSG00000032501	Trib1	15	59648350	59657099	59648350	1	tribbles pseudokinase 1 [Source:MGI Symbol;Acc:MGI:2443397]
ENSMUSG00000038600.12	42.7702	-0.765676	0.363529	-2.10623	0.0351845	0.554904	ENSMUSG00000038600.12	ENSMUSG00000038600	Atp6v0a4	6	38048483	38124586	38051561	-1	ATPase, H+ transporting, lysosomal V0 subunit A4 [Source:MGI Symbol;Acc:MGI:2153480]
ENSMUSG00000034755.18	246.487	0.352983	0.167601	2.10609	0.0351969	0.554904	ENSMUSG00000034755.18	ENSMUSG00000034755	Pcdh11x	X	120290259	120910619	120290259	1	protocadherin 11 X-linked [Source:MGI Symbol;Acc:MGI:2442849]
ENSMUSG00000018171.9	3246.76	0.121272	0.0575842	2.106	0.0352044	0.554904	ENSMUSG00000018171.9	ENSMUSG00000018171	Vmp1	11	86583865	86683836	86683836	-1	vacuole membrane protein 1 [Source:MGI Symbol;Acc:MGI:1923159]
ENSMUSG00000028004.12	1057.09	-0.180046	0.0855051	-2.10567	0.035233	0.554904	ENSMUSG00000028004.12	ENSMUSG00000028004	Npy2r	3	82538383	82548084	82548084	-1	neuropeptide Y receptor Y2 [Source:MGI Symbol;Acc:MGI:108418]
ENSMUSG00000052310.9	1485.45	-0.180176	0.0855957	-2.10496	0.0352946	0.555393	ENSMUSG00000052310.9	ENSMUSG00000052310	Slc39a1	3	90248172	90253612	90248172	1	solute carrier family 39 (zinc transporter), member 1 [Source:MGI Symbol;Acc:MGI:1353474]
ENSMUSG00000022747.17	1608.95	0.163877	0.0779215	2.1031	0.035457	0.557467	ENSMUSG00000022747.17	ENSMUSG00000022747	St3gal6	16	58468125	58524243	58523426	-1	ST3 beta-galactoside alpha-2,3-sialyltransferase 6 [Source:MGI Symbol;Acc:MGI:1888707]
ENSMUSG00000037563.15	3156.73	-0.151904	0.0722755	-2.10173	0.0355767	0.557869	ENSMUSG00000037563.15	ENSMUSG00000037563	Rps16	7	28350652	28353155	28350652	1	ribosomal protein S16 [Source:MGI Symbol;Acc:MGI:98118]
ENSMUSG00000017300.9	1519.56	-2.51827	1.19821	-2.10169	0.0355802	0.557869	ENSMUSG00000017300.9	ENSMUSG00000017300	Tnnc2	2	164777161	164779967	164779741	-1	troponin C2, fast [Source:MGI Symbol;Acc:MGI:98780]
ENSMUSG00000048027.9	15691.1	-0.0873125	0.041549	-2.10144	0.0356026	0.557869	ENSMUSG00000048027.9	ENSMUSG00000048027	Rgmb	17	15803188	15831039	15826586	-1	repulsive guidance molecule family member B [Source:MGI Symbol;Acc:MGI:1916049]
ENSMUSG00000039976.4	3007.25	0.123536	0.0587875	2.10141	0.0356054	0.557869	ENSMUSG00000039976.4	ENSMUSG00000039976	Tbc1d16	11	119143045	119228499	119228499	-1	TBC1 domain family, member 16 [Source:MGI Symbol;Acc:MGI:2652878]
ENSMUSG00000086096.1	105.391	-0.560764	0.267162	-2.09896	0.0358202	0.560223	ENSMUSG00000086096.1	ENSMUSG00000086096	Gm12688	4	99653607	99654983	99654983	-1	predicted gene 12688 [Source:MGI Symbol;Acc:MGI:3650434]
ENSMUSG00000059361.6	308.495	0.298775	0.142356	2.09879	0.0358355	0.560223	ENSMUSG00000059361.6	ENSMUSG00000059361	Nrsn2	2	152368755	152376638	152376638	-1	neurensin 2 [Source:MGI Symbol;Acc:MGI:2684969]
ENSMUSG00000063568.11	441.288	0.253079	0.120592	2.09865	0.0358481	0.560223	ENSMUSG00000063568.11	ENSMUSG00000063568	Jazf1	6	52768797	53068631	52778309	-1	JAZF zinc finger 1 [Source:MGI Symbol;Acc:MGI:2141450]
ENSMUSG00000063623.4	71.6404	-0.591635	0.28203	-2.09777	0.0359252	0.560935	ENSMUSG00000063623.4	ENSMUSG00000063623	C230062I16Rik	7	29953621	29970352	29953621	1	RIKEN cDNA C230062I16 gene [Source:MGI Symbol;Acc:MGI:2442417]
ENSMUSG00000040732.20	142.861	-0.40266	0.191978	-2.09743	0.0359554	0.560935	ENSMUSG00000040732.20	ENSMUSG00000040732	Erg	16	95359169	95586593	95530365	-1	ETS transcription factor [Source:MGI Symbol;Acc:MGI:95415]
ENSMUSG00000026308.8	49.2471	-2.3364	1.11501	-2.0954	0.0361357	0.562883	ENSMUSG00000026308.8	ENSMUSG00000026308	Klhl30	1	91351016	91362416	91351016	1	kelch-like 30 [Source:MGI Symbol;Acc:MGI:1918038]
ENSMUSG00000041445.9	542.385	-0.275661	0.131565	-2.09525	0.0361489	0.562883	ENSMUSG00000041445.9	ENSMUSG00000041445	Mmrn2	14	34375465	34404287	34375465	1	multimerin 2 [Source:MGI Symbol;Acc:MGI:2385618]
ENSMUSG00000051355.18	886.338	-0.174752	0.0834459	-2.09419	0.036243	0.562883	ENSMUSG00000051355.18	ENSMUSG00000051355	Commd1	11	22896136	22982382	22982382	-1	COMM domain containing 1 [Source:MGI Symbol;Acc:MGI:109474]
ENSMUSG00000097195.10	147.959	-0.51839	0.247565	-2.09396	0.0362637	0.562883	ENSMUSG00000097195.10	ENSMUSG00000097195	Snhg5	9	88495268	88523562	88522888	-1	small nucleolar RNA host gene 5 [Source:MGI Symbol;Acc:MGI:1919905]
ENSMUSG00000029769.16	4407.78	0.117871	0.0562917	2.09393	0.0362664	0.562883	ENSMUSG00000029769.16	ENSMUSG00000029769	Ccdc136	6	29396309	29426994	29396309	1	coiled-coil domain containing 136 [Source:MGI Symbol;Acc:MGI:1918128]
ENSMUSG00000015749.12	3699.92	0.105372	0.0503243	2.09387	0.0362715	0.562883	ENSMUSG00000015749.12	ENSMUSG00000015749	Anp32e	3	95929246	95947390	95929246	1	acidic (leucine-rich) nuclear phosphoprotein 32 family, member E [Source:MGI Symbol;Acc:MGI:1913721]
ENSMUSG00000041841.8	3238.71	-0.132747	0.0634146	-2.09332	0.0363204	0.562883	ENSMUSG00000041841.8	ENSMUSG00000041841	Rpl37	15	5116645	5119140	5116645	1	ribosomal protein L37 [Source:MGI Symbol;Acc:MGI:1914531]
ENSMUSG00000031698.14	15.8229	-1.6578	0.791979	-2.09324	0.036328	0.562883	ENSMUSG00000031698.14	ENSMUSG00000031698	Mylk3	8	85324303	85386345	85365324	-1	myosin light chain kinase 3 [Source:MGI Symbol;Acc:MGI:2443063]
ENSMUSG00000059447.13	6683.77	0.0960686	0.0459048	2.09278	0.0363687	0.563034	ENSMUSG00000059447.13	ENSMUSG00000059447	Hadhb	5	30155248	30184593	30155248	1	hydroxyacyl-CoA dehydrogenase trifunctional multienzyme complex subunit beta [Source:MGI Symbol;Acc:MGI:2136381]
ENSMUSG00000005125.13	21357.7	-0.101353	0.0484517	-2.09184	0.0364527	0.563129	ENSMUSG00000005125.13	ENSMUSG00000005125	Ndrg1	15	66929318	66969640	66969640	-1	N-myc downstream regulated gene 1 [Source:MGI Symbol;Acc:MGI:1341799]
ENSMUSG00000046916.9	69.4127	-0.624538	0.298659	-2.09114	0.0365156	0.563129	ENSMUSG00000046916.9	ENSMUSG00000046916	Myct1	10	5593775	5606904	5593775	1	myc target 1 [Source:MGI Symbol;Acc:MGI:1915882]
ENSMUSG00000021870.17	5871.72	0.135903	0.0649926	2.09105	0.0365234	0.563129	ENSMUSG00000021870.17	ENSMUSG00000021870	Slmap	14	26413168	26534931	26534931	-1	sarcolemma associated protein [Source:MGI Symbol;Acc:MGI:1933549]
ENSMUSG00000031077.7	167.853	-0.43264	0.206911	-2.09095	0.0365324	0.563129	ENSMUSG00000031077.7	ENSMUSG00000031077	Fadd	7	144577318	144582463	144582463	-1	Fas (TNFRSF6)-associated via death domain [Source:MGI Symbol;Acc:MGI:109324]
ENSMUSG00000026202.13	18117.4	0.104244	0.0498555	2.09092	0.0365353	0.563129	ENSMUSG00000026202.13	ENSMUSG00000026202	Tuba4a	1	75214228	75219865	75219294	-1	tubulin, alpha 4A [Source:MGI Symbol;Acc:MGI:1095410]
ENSMUSG00000022769.9	532.376	-0.233089	0.111492	-2.09063	0.0365608	0.563129	ENSMUSG00000022769.9	ENSMUSG00000022769	Sdf2l1	16	17130138	17132383	17132383	-1	stromal cell-derived factor 2-like 1 [Source:MGI Symbol;Acc:MGI:2149842]
ENSMUSG00000028300.14	5130.88	0.102057	0.0488483	2.08927	0.0366831	0.564535	ENSMUSG00000028300.14	ENSMUSG00000028300	C9orf72	4	35191285	35226175	35226123	-1	C9orf72, member of C9orf72-SMCR8 complex [Source:MGI Symbol;Acc:MGI:1920455]
ENSMUSG00000024661.7	61645.8	-0.107566	0.0515005	-2.08864	0.0367402	0.564555	ENSMUSG00000024661.7	ENSMUSG00000024661	Fth1	19	9980598	9985098	9980598	1	ferritin heavy polypeptide 1 [Source:MGI Symbol;Acc:MGI:95588]
ENSMUSG00000107994.1	63.1208	-0.746354	0.357352	-2.08857	0.0367465	0.564555	ENSMUSG00000107994.1	ENSMUSG00000107994	D830050J10Rik	6	115675968	115677780	115675968	1	RIKEN cDNA D830050J10 gene [Source:MGI Symbol;Acc:MGI:2444203]
ENSMUSG00000039533.8	3837.2	-0.127632	0.0611354	-2.0877	0.0368251	0.564957	ENSMUSG00000039533.8	ENSMUSG00000039533	Mmd2	5	142562358	142608800	142608800	-1	monocyte to macrophage differentiation-associated 2 [Source:MGI Symbol;Acc:MGI:1922354]
ENSMUSG00000026546.16	9.24703	-1.72705	0.827295	-2.08759	0.0368349	0.564957	ENSMUSG00000026546.16	ENSMUSG00000026546	Cfap45	1	172520801	172545870	172520801	1	cilia and flagella associated protein 45 [Source:MGI Symbol;Acc:MGI:1919120]
ENSMUSG00000014426.9	2489.74	0.130154	0.0623673	2.08689	0.0368983	0.565453	ENSMUSG00000014426.9	ENSMUSG00000014426	Map3k4	17	12227621	12318796	12318748	-1	mitogen-activated protein kinase kinase kinase 4 [Source:MGI Symbol;Acc:MGI:1346875]
ENSMUSG00000027223.15	27912.1	-0.0753159	0.0361099	-2.08574	0.0370021	0.566566	ENSMUSG00000027223.15	ENSMUSG00000027223	Mapk8ip1	2	92383676	92401263	92392731	-1	mitogen-activated protein kinase 8 interacting protein 1 [Source:MGI Symbol;Acc:MGI:1309464]
ENSMUSG00000028037.13	81.9907	-0.65122	0.312437	-2.08433	0.0371303	0.568022	ENSMUSG00000028037.13	ENSMUSG00000028037	Ifi44	3	151730922	151749960	151749960	-1	interferon-induced protein 44 [Source:MGI Symbol;Acc:MGI:2443016]
ENSMUSG00000005045.16	4369.61	0.176051	0.084499	2.08346	0.0372089	0.568022	ENSMUSG00000005045.16	ENSMUSG00000005045	Chd5	4	152338651	152390194	152338887	1	chromodomain helicase DNA binding protein 5 [Source:MGI Symbol;Acc:MGI:3036258]
ENSMUSG00000035963.8	3.48896	-4.2706	2.04994	-2.08328	0.0372257	NA	ENSMUSG00000035963.8	ENSMUSG00000035963	Odf3l2	10	79639526	79645738	79645738	-1	outer dense fiber of sperm tails 3-like 2 [Source:MGI Symbol;Acc:MGI:2686003]
ENSMUSG00000052040.10	7991.55	0.0878541	0.0421721	2.08323	0.0372304	0.568022	ENSMUSG00000052040.10	ENSMUSG00000052040	Klf13	7	63886351	63938915	63938915	-1	Kruppel-like factor 13 [Source:MGI Symbol;Acc:MGI:1354948]
ENSMUSG00000027649.15	2418.94	0.139486	0.0669612	2.08308	0.0372435	0.568022	ENSMUSG00000027649.15	ENSMUSG00000027649	Ctnnbl1	2	157737401	157891614	157737401	1	catenin, beta like 1 [Source:MGI Symbol;Acc:MGI:1913892]
ENSMUSG00000040797.16	3464.24	-0.104434	0.0501434	-2.08271	0.0372781	0.568022	ENSMUSG00000040797.16	ENSMUSG00000040797	Iqsec3	6	121372933	121473678	121473623	-1	IQ motif and Sec7 domain 3 [Source:MGI Symbol;Acc:MGI:2677208]
ENSMUSG00000032849.14	1321.08	-0.201263	0.0966386	-2.08263	0.0372848	0.568022	ENSMUSG00000032849.14	ENSMUSG00000032849	Abcc4	14	118482692	118706219	118706205	-1	ATP-binding cassette, sub-family C (CFTR/MRP), member 4 [Source:MGI Symbol;Acc:MGI:2443111]
ENSMUSG00000038510.12	776.177	0.185015	0.0888628	2.08203	0.0373401	0.568389	ENSMUSG00000038510.12	ENSMUSG00000038510	Rpf2	10	40223246	40247036	40247002	-1	ribosome production factor 2 homolog [Source:MGI Symbol;Acc:MGI:1914489]
ENSMUSG00000041064.14	10.3899	-2.20156	1.05784	-2.08118	0.0374175	0.56909	ENSMUSG00000041064.14	ENSMUSG00000041064	Pif1	9	65587160	65595967	65587160	1	PIF1 5'-to-3' DNA helicase [Source:MGI Symbol;Acc:MGI:2143057]
ENSMUSG00000028584.3	11.1896	-2.3447	1.12687	-2.08072	0.0374598	0.569257	ENSMUSG00000028584.3	ENSMUSG00000028584	Lrrc38	4	143349757	143371032	143349757	1	leucine rich repeat containing 38 [Source:MGI Symbol;Acc:MGI:2442845]
ENSMUSG00000041879.13	4752.18	0.115799	0.0556748	2.07992	0.0375332	0.569896	ENSMUSG00000041879.13	ENSMUSG00000041879	Ipo9	1	135382312	135430499	135430499	-1	importin 9 [Source:MGI Symbol;Acc:MGI:1918944]
ENSMUSG00000063130.4	2.58036	-3.80186	1.8287	-2.079	0.0376176	NA	ENSMUSG00000063130.4	ENSMUSG00000063130	Calml3	13	3802896	3804316	3804316	-1	calmodulin-like 3 [Source:MGI Symbol;Acc:MGI:1917655]
ENSMUSG00000028613.15	2197.88	-0.147028	0.0707397	-2.07843	0.0376695	0.570846	ENSMUSG00000028613.15	ENSMUSG00000028613	Lrp8	4	107801869	107876840	107801869	1	low density lipoprotein receptor-related protein 8, apolipoprotein e receptor [Source:MGI Symbol;Acc:MGI:1340044]
ENSMUSG00000004460.17	2070.32	-0.121905	0.0586618	-2.0781	0.0376998	0.570846	ENSMUSG00000004460.17	ENSMUSG00000004460	Dnajb11	16	22857845	22879634	22857845	1	DnaJ heat shock protein family (Hsp40) member B11 [Source:MGI Symbol;Acc:MGI:1915088]
ENSMUSG00000056234.15	7481.85	0.113894	0.054811	2.07794	0.0377147	0.570846	ENSMUSG00000056234.15	ENSMUSG00000056234	Ncoa4	14	32159865	32179855	32159865	1	nuclear receptor coactivator 4 [Source:MGI Symbol;Acc:MGI:1350932]
ENSMUSG00000005951.13	937.762	-0.242989	0.116941	-2.07787	0.0377214	0.570846	ENSMUSG00000005951.13	ENSMUSG00000005951	Shpk	11	73199460	73224511	73199460	1	sedoheptulokinase [Source:MGI Symbol;Acc:MGI:1921887]
ENSMUSG00000020892.10	9.97909	-1.8419	0.886971	-2.07662	0.0378364	0.572111	ENSMUSG00000020892.10	ENSMUSG00000020892	Aloxe3	11	69125896	69149115	69125896	1	arachidonate lipoxygenase 3 [Source:MGI Symbol;Acc:MGI:1345140]
ENSMUSG00000059430.14	50.5918	-0.809768	0.390017	-2.07624	0.0378722	0.572176	ENSMUSG00000059430.14	ENSMUSG00000059430	Actg2	6	83512905	83536265	83536265	-1	actin, gamma 2, smooth muscle, enteric [Source:MGI Symbol;Acc:MGI:104589]
ENSMUSG00000030616.16	6696.81	0.120079	0.0578586	2.07538	0.0379509	0.57244	ENSMUSG00000030616.16	ENSMUSG00000030616	Sytl2	7	90302252	90410719	90302252	1	synaptotagmin-like 2 [Source:MGI Symbol;Acc:MGI:1933366]
ENSMUSG00000038239.11	173.51	-2.2045	1.06222	-2.07537	0.0379527	0.57244	ENSMUSG00000038239.11	ENSMUSG00000038239	Hrc	7	45335290	45338974	45335290	1	histidine rich calcium binding protein [Source:MGI Symbol;Acc:MGI:96226]
ENSMUSG00000028023.16	2.39623	-4.76624	2.29821	-2.07389	0.0380895	NA	ENSMUSG00000028023.16	ENSMUSG00000028023	Pitx2	3	129199878	129219591	129199878	1	paired-like homeodomain transcription factor 2 [Source:MGI Symbol;Acc:MGI:109340]
ENSMUSG00000030787.4	215.488	-0.429457	0.207157	-2.07309	0.0381636	0.573636	ENSMUSG00000030787.4	ENSMUSG00000030787	Lyve1	7	110850607	110863239	110863239	-1	lymphatic vessel endothelial hyaluronan receptor 1 [Source:MGI Symbol;Acc:MGI:2136348]
ENSMUSG00000060600.15	1457.4	-1.90096	0.917019	-2.07298	0.0381746	0.573636	ENSMUSG00000060600.15	ENSMUSG00000060600	Eno3	11	70657202	70662513	70657202	1	enolase 3, beta muscle [Source:MGI Symbol;Acc:MGI:95395]
ENSMUSG00000022556.11	1669.18	-0.152132	0.0733908	-2.07291	0.0381811	0.573636	ENSMUSG00000022556.11	ENSMUSG00000022556	Hsf1	15	76477422	76501913	76477422	1	heat shock factor 1 [Source:MGI Symbol;Acc:MGI:96238]
ENSMUSG00000030557.17	7227.76	0.101759	0.0490981	2.07256	0.0382134	0.573636	ENSMUSG00000030557.17	ENSMUSG00000030557	Mef2a	7	67231163	67372858	67372858	-1	myocyte enhancer factor 2A [Source:MGI Symbol;Acc:MGI:99532]
ENSMUSG00000037148.8	411.135	-0.241992	0.116773	-2.07233	0.0382347	0.573636	ENSMUSG00000037148.8	ENSMUSG00000037148	Arhgap10	8	77250366	77517953	77517953	-1	Rho GTPase activating protein 10 [Source:MGI Symbol;Acc:MGI:1925764]
ENSMUSG00000061175.12	569.244	0.226107	0.10911	2.07228	0.0382389	0.573636	ENSMUSG00000061175.12	ENSMUSG00000061175	Fnip2	3	79455974	79567796	79567796	-1	folliculin interacting protein 2 [Source:MGI Symbol;Acc:MGI:2683054]
ENSMUSG00000030898.15	18.8575	-1.77383	0.856039	-2.07213	0.0382529	0.573636	ENSMUSG00000030898.15	ENSMUSG00000030898	Cckbr	7	105425731	105470898	105425731	1	cholecystokinin B receptor [Source:MGI Symbol;Acc:MGI:99479]
ENSMUSG00000026207.16	1725.4	-0.208136	0.100467	-2.07168	0.0382953	0.573797	ENSMUSG00000026207.16	ENSMUSG00000026207	Speg	1	75375297	75432320	75375297	1	SPEG complex locus [Source:MGI Symbol;Acc:MGI:109282]
ENSMUSG00000023349.14	17.6861	-1.30971	0.632398	-2.07102	0.038357	0.57394	ENSMUSG00000023349.14	ENSMUSG00000023349	Clec4n	6	123229843	123247021	123229843	1	C-type lectin domain family 4, member n [Source:MGI Symbol;Acc:MGI:1861231]
ENSMUSG00000033715.15	152.501	-0.486713	0.235025	-2.0709	0.0383679	0.57394	ENSMUSG00000033715.15	ENSMUSG00000033715	Akr1c14	13	4049011	4090688	4049011	1	aldo-keto reductase family 1, member C14 [Source:MGI Symbol;Acc:MGI:2145458]
ENSMUSG00000064302.13	10304.8	0.0987011	0.0476787	2.07013	0.0384403	0.57455	ENSMUSG00000064302.13	ENSMUSG00000064302	Clasp1	1	118389058	118612678	118389058	1	CLIP associating protein 1 [Source:MGI Symbol;Acc:MGI:1923957]
ENSMUSG00000049176.16	2850.77	0.190297	0.0919489	2.06959	0.0384907	0.574706	ENSMUSG00000049176.16	ENSMUSG00000049176	Frmpd4	X	167471309	168577231	167855077	-1	FERM and PDZ domain containing 4 [Source:MGI Symbol;Acc:MGI:3042378]
ENSMUSG00000026853.15	2231	-0.167136	0.0807828	-2.06895	0.0385504	0.574706	ENSMUSG00000026853.15	ENSMUSG00000026853	Crat	2	30400471	30415813	30415771	-1	carnitine acetyltransferase [Source:MGI Symbol;Acc:MGI:109501]
ENSMUSG00000075590.4	7297.94	-0.126053	0.0609311	-2.06878	0.0385669	0.574706	ENSMUSG00000075590.4	ENSMUSG00000075590	Nrbp2	15	76085518	76091627	76091505	-1	nuclear receptor binding protein 2 [Source:MGI Symbol;Acc:MGI:2385017]
ENSMUSG00000097333.7	462.421	0.247452	0.119619	2.06867	0.0385772	0.574706	ENSMUSG00000097333.7	ENSMUSG00000097333	Zfp87	13	67515781	67526177	67526177	-1	zinc finger protein 87 [Source:MGI Symbol;Acc:MGI:107768]
ENSMUSG00000071531.3	1107.03	-0.223706	0.108208	-2.06738	0.0386985	0.57604	ENSMUSG00000071531.3	ENSMUSG00000071531	Gprin2	14	34185688	34201653	34201633	-1	G protein regulated inducer of neurite outgrowth 2 [Source:MGI Symbol;Acc:MGI:2444560]
ENSMUSG00000094800.8	282.565	-0.347445	0.168134	-2.06648	0.0387831	0.576735	ENSMUSG00000094800.8	ENSMUSG00000094800	Gm9780	14	26027282	26042711	26042711	-1	predicted gene 9780 [Source:MGI Symbol;Acc:MGI:3710532]
ENSMUSG00000033066.16	2984.82	-0.156317	0.0756822	-2.06544	0.0388812	0.576735	ENSMUSG00000033066.16	ENSMUSG00000033066	Gas7	11	67455091	67688990	67455091	1	growth arrest specific 7 [Source:MGI Symbol;Acc:MGI:1202388]
ENSMUSG00000026385.16	4884.84	-0.141629	0.068571	-2.06543	0.0388821	0.576735	ENSMUSG00000026385.16	ENSMUSG00000026385	Dbi	1	120113280	120121078	120121078	-1	diazepam binding inhibitor [Source:MGI Symbol;Acc:MGI:94865]
ENSMUSG00000022797.16	6844.17	-0.172959	0.0837483	-2.06522	0.038902	0.576735	ENSMUSG00000022797.16	ENSMUSG00000022797	Tfrc	16	32608920	32632794	32608920	1	transferrin receptor [Source:MGI Symbol;Acc:MGI:98822]
ENSMUSG00000110710.1	1429.23	-0.243043	0.117687	-2.06516	0.0389081	0.576735	ENSMUSG00000110710.1	ENSMUSG00000110710	C78859	8	94322158	94328100	94322158	1	expressed sequence C78859 [Source:MGI Symbol;Acc:MGI:2142856]
ENSMUSG00000000751.13	5320.24	0.129899	0.0629089	2.06487	0.0389355	0.576735	ENSMUSG00000000751.13	ENSMUSG00000000751	Rpa1	11	75298166	75348324	75348324	-1	replication protein A1 [Source:MGI Symbol;Acc:MGI:1915525]
ENSMUSG00000047554.14	4009.9	0.0977086	0.0473587	2.06316	0.0390972	0.578658	ENSMUSG00000047554.14	ENSMUSG00000047554	Tmem41b	7	109972187	109986929	109986451	-1	transmembrane protein 41B [Source:MGI Symbol;Acc:MGI:1289225]
ENSMUSG00000029234.13	1491.38	0.150937	0.0731746	2.0627	0.0391416	0.578741	ENSMUSG00000029234.13	ENSMUSG00000029234	Tmem165	5	76183880	76209245	76204120	1	transmembrane protein 165 [Source:MGI Symbol;Acc:MGI:894407]
ENSMUSG00000032332.17	1628.31	-0.216909	0.105171	-2.06243	0.0391665	0.578741	ENSMUSG00000032332.17	ENSMUSG00000032332	Col12a1	9	79598991	79718831	79612970	-1	collagen, type XII, alpha 1 [Source:MGI Symbol;Acc:MGI:88448]
ENSMUSG00000084989.3	14.4373	-1.37236	0.666077	-2.06036	0.0393642	0.580394	ENSMUSG00000084989.3	ENSMUSG00000084989	Crocc2	1	93168725	93231072	93168725	1	ciliary rootlet coiled-coil, rootletin family member 2 [Source:MGI Symbol;Acc:MGI:3045962]
ENSMUSG00000053012.17	698.318	0.280957	0.136365	2.06034	0.0393664	0.580394	ENSMUSG00000053012.17	ENSMUSG00000053012	Krcc1	6	71271677	71285319	71271677	1	lysine-rich coiled-coil 1 [Source:MGI Symbol;Acc:MGI:1889377]
ENSMUSG00000096606.2	3917.36	0.112072	0.0543971	2.06026	0.0393742	0.580394	ENSMUSG00000096606.2	ENSMUSG00000096606	Tpbgl	7	99624082	99627103	99627103	-1	trophoblast glycoprotein-like [Source:MGI Symbol;Acc:MGI:3646425]
ENSMUSG00000022803.12	54.2993	-0.779083	0.378411	-2.05883	0.0395105	0.581712	ENSMUSG00000022803.12	ENSMUSG00000022803	Popdc2	16	38362209	38378216	38362209	1	popeye domain containing 2 [Source:MGI Symbol;Acc:MGI:1930150]
ENSMUSG00000030726.16	553.689	-0.212166	0.103067	-2.05852	0.0395399	0.581712	ENSMUSG00000030726.16	ENSMUSG00000030726	Pold3	7	100082111	100121565	100121565	-1	polymerase (DNA-directed), delta 3, accessory subunit [Source:MGI Symbol;Acc:MGI:1915217]
ENSMUSG00000055239.10	4602.21	-0.10981	0.0533495	-2.05832	0.0395596	0.581712	ENSMUSG00000055239.10	ENSMUSG00000055239	Kcmf1	6	72841114	72899979	72899979	-1	potassium channel modulatory factor 1 [Source:MGI Symbol;Acc:MGI:1921537]
ENSMUSG00000045414.7	2441.16	0.143775	0.0698729	2.05766	0.0396225	0.581753	ENSMUSG00000045414.7	ENSMUSG00000045414	Dipk2a	9	94517864	94538081	94538081	-1	divergent protein kinase domain 2A [Source:MGI Symbol;Acc:MGI:1916111]
ENSMUSG00000000787.12	18036.1	0.0883962	0.0429668	2.05732	0.0396558	0.581753	ENSMUSG00000000787.12	ENSMUSG00000000787	Ddx3x	X	13280970	13294052	13280970	1	DEAD/H (Asp-Glu-Ala-Asp/His) box polypeptide 3, X-linked [Source:MGI Symbol;Acc:MGI:103064]
ENSMUSG00000045934.15	465.352	-0.270284	0.131379	-2.05729	0.0396584	0.581753	ENSMUSG00000045934.15	ENSMUSG00000045934	Mtmr11	3	96162004	96171718	96162004	1	myotubularin related protein 11 [Source:MGI Symbol;Acc:MGI:2652817]
ENSMUSG00000021647.7	490.573	0.32071	0.155952	2.05647	0.0397372	0.582349	ENSMUSG00000021647.7	ENSMUSG00000021647	Cartpt	13	99898489	99901091	99900641	-1	CART prepropeptide [Source:MGI Symbol;Acc:MGI:1351330]
ENSMUSG00000046862.14	739.838	-0.203294	0.0988685	-2.0562	0.0397631	0.582349	ENSMUSG00000046862.14	ENSMUSG00000046862	Pramef8	4	143412426	143421091	143412426	1	PRAME family member 8 [Source:MGI Symbol;Acc:MGI:2140473]
ENSMUSG00000028484.16	6445.81	0.117188	0.0570242	2.05505	0.0398741	0.583503	ENSMUSG00000028484.16	ENSMUSG00000028484	Psip1	4	83455680	83486459	83486459	-1	PC4 and SFRS1 interacting protein 1 [Source:MGI Symbol;Acc:MGI:2142116]
ENSMUSG00000047735.14	670.959	-0.226318	0.110216	-2.05341	0.0400325	0.585351	ENSMUSG00000047735.14	ENSMUSG00000047735	Samd9l	6	3372257	3399572	3399572	-1	sterile alpha motif domain containing 9-like [Source:MGI Symbol;Acc:MGI:1343184]
ENSMUSG00000041453.12	7999.77	-0.0972042	0.0473555	-2.05265	0.0401068	0.585409	ENSMUSG00000041453.12	ENSMUSG00000041453	Rpl21	5	146832890	146837032	146832890	1	ribosomal protein L21 [Source:MGI Symbol;Acc:MGI:1278340]
ENSMUSG00000028845.15	31.4337	0.905883	0.441372	2.05242	0.0401285	0.585409	ENSMUSG00000028845.15	ENSMUSG00000028845	Tekt2	4	126322121	126325688	126325688	-1	tektin 2 [Source:MGI Symbol;Acc:MGI:1346335]
ENSMUSG00000091736.3	3.07921	5.02277	2.44728	2.05238	0.0401323	NA	ENSMUSG00000091736.3	ENSMUSG00000091736	Yy2	X	157566119	157568985	157568985	-1	Yy2 transcription factor [Source:MGI Symbol;Acc:MGI:3837947]
ENSMUSG00000038507.6	671.949	-0.213568	0.104059	-2.05238	0.0401331	0.585409	ENSMUSG00000038507.6	ENSMUSG00000038507	Parp12	6	39086410	39118349	39118349	-1	poly (ADP-ribose) polymerase family, member 12 [Source:MGI Symbol;Acc:MGI:2143990]
ENSMUSG00000063446.4	60.4268	0.626216	0.305193	2.05187	0.0401827	0.585662	ENSMUSG00000063446.4	ENSMUSG00000063446	Plppr1	4	49059273	49340259	49059282	1	phospholipid phosphatase related 1 [Source:MGI Symbol;Acc:MGI:2445015]
ENSMUSG00000030335.6	2247	-0.126803	0.0618395	-2.05051	0.0403145	0.586176	ENSMUSG00000030335.6	ENSMUSG00000030335	Mrpl51	6	125191801	125196269	125191801	1	mitochondrial ribosomal protein L51 [Source:MGI Symbol;Acc:MGI:1913743]
ENSMUSG00000026208.9	686.633	-2.06473	1.00698	-2.05041	0.0403243	0.586176	ENSMUSG00000026208.9	ENSMUSG00000026208	Des	1	75360329	75368579	75360329	1	desmin [Source:MGI Symbol;Acc:MGI:94885]
ENSMUSG00000036291.6	1211.88	0.170781	0.0832946	2.05032	0.0403329	0.586176	ENSMUSG00000036291.6	ENSMUSG00000036291	Ap5m1	14	49066097	49094234	49066097	1	adaptor-related protein complex 5, mu 1 subunit [Source:MGI Symbol;Acc:MGI:1921635]
ENSMUSG00000047866.18	4415.79	0.126129	0.0615347	2.04972	0.0403915	0.586176	ENSMUSG00000047866.18	ENSMUSG00000047866	Lonp2	8	86624043	86723873	86624043	1	lon peptidase 2, peroxisomal [Source:MGI Symbol;Acc:MGI:1914137]
ENSMUSG00000051235.10	128.753	-0.466565	0.227657	-2.04942	0.0404213	0.586176	ENSMUSG00000051235.10	ENSMUSG00000051235	Gen1	12	11238920	11265801	11265766	-1	GEN1, Holliday junction 5' flap endonuclease [Source:MGI Symbol;Acc:MGI:2443149]
ENSMUSG00000095042.1	28.242	1.42667	0.696212	2.0492	0.0404428	0.586176	ENSMUSG00000095042.1	ENSMUSG00000095042	Gm12537	4	57370953	57371954	57371954	-1	predicted gene 12537 [Source:MGI Symbol;Acc:MGI:3650720]
ENSMUSG00000020326.7	5473.89	-0.14311	0.0698373	-2.04919	0.0404437	0.586176	ENSMUSG00000020326.7	ENSMUSG00000020326	Ccng1	11	40748552	40755311	40755311	-1	cyclin G1 [Source:MGI Symbol;Acc:MGI:102890]
ENSMUSG00000056220.14	92.6272	-0.564575	0.275607	-2.04848	0.0405127	0.586708	ENSMUSG00000056220.14	ENSMUSG00000056220	Pla2g4a	1	149829618	149961290	149961290	-1	phospholipase A2, group IVA (cytosolic, calcium-dependent) [Source:MGI Symbol;Acc:MGI:1195256]
ENSMUSG00000070385.12	138.367	-2.5237	1.23225	-2.04805	0.0405552	0.586856	ENSMUSG00000070385.12	ENSMUSG00000070385	Ampd1	3	103074014	103099720	103074014	1	adenosine monophosphate deaminase 1 [Source:MGI Symbol;Acc:MGI:88015]
ENSMUSG00000022421.19	12229.1	-0.156722	0.0765619	-2.04699	0.0406591	0.587247	ENSMUSG00000022421.19	ENSMUSG00000022421	Nptxr	15	79786351	79804766	79804766	-1	neuronal pentraxin receptor [Source:MGI Symbol;Acc:MGI:1920590]
ENSMUSG00000033713.12	2055.51	0.123974	0.0605702	2.04678	0.0406798	0.587247	ENSMUSG00000033713.12	ENSMUSG00000033713	Foxn3	12	99190078	99563582	99393797	-1	forkhead box N3 [Source:MGI Symbol;Acc:MGI:1918625]
ENSMUSG00000026566.15	1013.36	-0.199283	0.0974101	-2.04581	0.0407747	0.587247	ENSMUSG00000026566.15	ENSMUSG00000026566	Mpzl1	1	165592240	165634538	165634521	-1	myelin protein zero-like 1 [Source:MGI Symbol;Acc:MGI:1915731]
ENSMUSG00000024366.8	2881.55	0.126248	0.0617231	2.04539	0.0408169	0.587247	ENSMUSG00000024366.8	ENSMUSG00000024366	Gfra3	18	34689898	34720387	34720387	-1	glial cell line derived neurotrophic factor family receptor alpha 3 [Source:MGI Symbol;Acc:MGI:1201403]
ENSMUSG00000024507.6	3357.45	0.112404	0.0549561	2.04535	0.0408208	0.587247	ENSMUSG00000024507.6	ENSMUSG00000024507	Hsd17b4	18	50128201	50196269	50128201	1	hydroxysteroid (17-beta) dehydrogenase 4 [Source:MGI Symbol;Acc:MGI:105089]
ENSMUSG00000031295.13	915.839	0.18352	0.08973	2.04524	0.0408311	0.587247	ENSMUSG00000031295.13	ENSMUSG00000031295	Phka2	X	160502166	160598878	160502434	1	phosphorylase kinase alpha 2 [Source:MGI Symbol;Acc:MGI:97577]
ENSMUSG00000070866.4	1391.51	-0.186763	0.091324	-2.04506	0.0408493	0.587247	ENSMUSG00000070866.4	ENSMUSG00000070866	Zfp804a	2	82053222	82259879	82053222	1	zinc finger protein 804A [Source:MGI Symbol;Acc:MGI:2442949]
ENSMUSG00000035615.12	8618.17	-0.120255	0.0588096	-2.04483	0.040872	0.587247	ENSMUSG00000035615.12	ENSMUSG00000035615	Frmpd1	4	45184875	45285936	45203925	1	FERM and PDZ domain containing 1 [Source:MGI Symbol;Acc:MGI:2446274]
ENSMUSG00000026069.15	46.1461	-0.767185	0.375185	-2.04482	0.040873	0.587247	ENSMUSG00000026069.15	ENSMUSG00000026069	Il1rl1	1	40429570	40465415	40429570	1	interleukin 1 receptor-like 1 [Source:MGI Symbol;Acc:MGI:98427]
ENSMUSG00000037259.15	7501.83	0.122406	0.0600025	2.04002	0.041348	0.593395	ENSMUSG00000037259.15	ENSMUSG00000037259	Dzank1	2	144470557	144527414	144527414	-1	double zinc ribbon and ankyrin repeat domains 1 [Source:MGI Symbol;Acc:MGI:2139080]
ENSMUSG00000032215.15	1631.81	0.140003	0.0686453	2.03951	0.0413992	0.593395	ENSMUSG00000032215.15	ENSMUSG00000032215	Rsl24d1	9	73113426	73123333	73113426	1	ribosomal L24 domain containing 1 [Source:MGI Symbol;Acc:MGI:2681840]
ENSMUSG00000052299.9	3781.62	0.128387	0.0629593	2.0392	0.0414297	0.593395	ENSMUSG00000052299.9	ENSMUSG00000052299	Ltn1	16	87376651	87432612	87432612	-1	listerin E3 ubiquitin protein ligase 1 [Source:MGI Symbol;Acc:MGI:1926163]
ENSMUSG00000023990.18	513.606	-0.268706	0.131771	-2.03919	0.0414316	0.593395	ENSMUSG00000023990.18	ENSMUSG00000023990	Tfeb	17	47737030	47792419	47737030	1	transcription factor EB [Source:MGI Symbol;Acc:MGI:103270]
ENSMUSG00000072770.9	64.6268	0.60269	0.295625	2.0387	0.0414798	0.593619	ENSMUSG00000072770.9	ENSMUSG00000072770	Acrbp	6	125049689	125063267	125049689	1	proacrosin binding protein [Source:MGI Symbol;Acc:MGI:1859515]
ENSMUSG00000021253.7	1115.69	-0.158926	0.0779969	-2.03759	0.0415907	0.594737	ENSMUSG00000021253.7	ENSMUSG00000021253	Tgfb3	12	86056745	86079041	86079041	-1	transforming growth factor, beta 3 [Source:MGI Symbol;Acc:MGI:98727]
ENSMUSG00000060260.13	749.44	0.199378	0.0978698	2.03718	0.0416322	0.594862	ENSMUSG00000060260.13	ENSMUSG00000060260	Pwwp2b	7	139248482	139269903	139248482	1	PWWP domain containing 2B [Source:MGI Symbol;Acc:MGI:2142008]
ENSMUSG00000070934.6	5977.68	0.0891651	0.0437765	2.03683	0.0416675	0.594899	ENSMUSG00000070934.6	ENSMUSG00000070934	Rraga	4	86575668	86577285	86575668	1	Ras-related GTP binding A [Source:MGI Symbol;Acc:MGI:1915691]
ENSMUSG00000027007.16	3183.79	-0.14981	0.0735671	-2.03637	0.0417133	0.595011	ENSMUSG00000027007.16	ENSMUSG00000027007	Itprid2	2	79635352	79672966	79635352	1	ITPR interacting domain containing 2 [Source:MGI Symbol;Acc:MGI:1917849]
ENSMUSG00000079641.3	2666.05	-0.155439	0.0763418	-2.0361	0.0417408	0.595011	ENSMUSG00000079641.3	ENSMUSG00000079641	Rpl39	X	37082520	37085402	37085402	-1	ribosomal protein L39 [Source:MGI Symbol;Acc:MGI:1914498]
ENSMUSG00000024044.19	52828.6	0.103306	0.0507651	2.03498	0.0418525	0.596043	ENSMUSG00000024044.19	ENSMUSG00000024044	Epb41l3	17	69075683	69289989	69075683	1	erythrocyte membrane protein band 4.1 like 3 [Source:MGI Symbol;Acc:MGI:103008]
ENSMUSG00000042816.4	60.6631	-0.666512	0.327575	-2.03469	0.0418823	0.596043	ENSMUSG00000042816.4	ENSMUSG00000042816	Gpr151	18	42577881	42579652	42579652	-1	G protein-coupled receptor 151 [Source:MGI Symbol;Acc:MGI:2441887]
ENSMUSG00000020803.3	2552.31	-0.129765	0.0637979	-2.034	0.0419516	0.596043	ENSMUSG00000020803.3	ENSMUSG00000020803	Txndc17	11	72207547	72210015	72207547	1	thioredoxin domain containing 17 [Source:MGI Symbol;Acc:MGI:1289248]
ENSMUSG00000064330.9	5.8621	-2.73309	1.34391	-2.03369	0.0419831	NA	ENSMUSG00000064330.9	ENSMUSG00000064330	Pde6h	6	136923832	136968865	136923832	1	phosphodiesterase 6H, cGMP-specific, cone, gamma [Source:MGI Symbol;Acc:MGI:1925850]
ENSMUSG00000064329.13	7789.69	0.13798	0.0678493	2.03363	0.0419893	0.596043	ENSMUSG00000064329.13	ENSMUSG00000064329	Scn1a	2	66270778	66440840	66317946	-1	sodium channel, voltage-gated, type I, alpha [Source:MGI Symbol;Acc:MGI:98246]
ENSMUSG00000103181.1	44.4283	-0.706711	0.347519	-2.03359	0.0419928	0.596043	ENSMUSG00000103181.1	ENSMUSG00000103181	A330069K06Rik	3	80054892	80213085	80054892	1	RIKEN cDNA A330069K06 gene [Source:MGI Symbol;Acc:MGI:2685464]
ENSMUSG00000025739.13	7.58874	-2.2767	1.11966	-2.03338	0.0420139	0.596043	ENSMUSG00000025739.13	ENSMUSG00000025739	Gng13	17	25717171	25719406	25717171	1	guanine nucleotide binding protein (G protein), gamma 13 [Source:MGI Symbol;Acc:MGI:1925616]
ENSMUSG00000078994.9	58.5579	-0.75231	0.370177	-2.0323	0.0421235	0.596043	ENSMUSG00000078994.9	ENSMUSG00000078994	Zfp429	13	67387905	67399819	67399743	-1	zinc finger protein 429 [Source:MGI Symbol;Acc:MGI:1920057]
ENSMUSG00000020297.10	8764.55	0.100399	0.0494021	2.03229	0.0421242	0.596043	ENSMUSG00000020297.10	ENSMUSG00000020297	Nsg2	11	32000463	32059202	32000463	1	neuron specific gene family member 2 [Source:MGI Symbol;Acc:MGI:1202070]
ENSMUSG00000009350.13	46.7576	1.08185	0.532477	2.03174	0.0421801	0.596043	ENSMUSG00000009350.13	ENSMUSG00000009350	Mpo	11	87793581	87804413	87793581	1	myeloperoxidase [Source:MGI Symbol;Acc:MGI:97137]
ENSMUSG00000034892.8	3949.36	-0.114285	0.0562511	-2.03169	0.0421846	0.596043	ENSMUSG00000034892.8	ENSMUSG00000034892	Rps29	12	69157722	69159186	69159186	-1	ribosomal protein S29 [Source:MGI Symbol;Acc:MGI:107681]
ENSMUSG00000033161.10	183471	0.0848577	0.0417799	2.03106	0.0422486	0.596043	ENSMUSG00000033161.10	ENSMUSG00000033161	Atp1a1	3	101576219	101604684	101604684	-1	ATPase, Na+/K+ transporting, alpha 1 polypeptide [Source:MGI Symbol;Acc:MGI:88105]
ENSMUSG00000003234.16	3986.94	0.122214	0.06019	2.03047	0.0423087	0.596043	ENSMUSG00000003234.16	ENSMUSG00000003234	Abcf3	16	20548577	20561379	20548577	1	ATP-binding cassette, sub-family F (GCN20), member 3 [Source:MGI Symbol;Acc:MGI:1351656]
ENSMUSG00000030785.8	97.7951	-1.87129	0.921619	-2.03044	0.0423116	0.596043	ENSMUSG00000030785.8	ENSMUSG00000030785	Cox6a2	7	128205435	128206387	128206387	-1	cytochrome c oxidase subunit 6A2 [Source:MGI Symbol;Acc:MGI:104649]
ENSMUSG00000028464.16	2294.56	-1.81407	0.893699	-2.02985	0.0423722	0.596043	ENSMUSG00000028464.16	ENSMUSG00000028464	Tpm2	4	43514711	43523765	43523438	-1	tropomyosin 2, beta [Source:MGI Symbol;Acc:MGI:98810]
ENSMUSG00000026170.6	190.613	-0.368846	0.181715	-2.02981	0.0423761	0.596043	ENSMUSG00000026170.6	ENSMUSG00000026170	Cyp27a1	1	74713574	74737892	74713574	1	cytochrome P450, family 27, subfamily a, polypeptide 1 [Source:MGI Symbol;Acc:MGI:88594]
ENSMUSG00000040570.14	1056.89	0.169789	0.0836558	2.02961	0.0423958	0.596043	ENSMUSG00000040570.14	ENSMUSG00000040570	Rundc3b	5	8490334	8622952	8622952	-1	RUN domain containing 3B [Source:MGI Symbol;Acc:MGI:2685286]
ENSMUSG00000107194.1	8.23427	1.79376	0.883845	2.02949	0.0424082	0.596043	ENSMUSG00000107194.1	ENSMUSG00000107194	Gm43173	5	93092759	93093351	93093351	-1	predicted gene 43173 [Source:MGI Symbol;Acc:MGI:5663310]
ENSMUSG00000076934.2	8.29962	1.79237	0.883165	2.02948	0.0424089	0.596043	ENSMUSG00000076934.2	ENSMUSG00000076934	Iglv1	16	19085017	19085500	19085500	-1	immunoglobulin lambda variable 1 [Source:MGI Symbol;Acc:MGI:96530]
ENSMUSG00000040183.13	1524.62	-0.133958	0.0660146	-2.02922	0.0424363	0.596043	ENSMUSG00000040183.13	ENSMUSG00000040183	Ankrd6	4	32804035	32950841	32923455	-1	ankyrin repeat domain 6 [Source:MGI Symbol;Acc:MGI:2154278]
ENSMUSG00000088947.1	3.76813	2.69434	1.32923	2.027	0.0426626	NA	ENSMUSG00000088947.1	ENSMUSG00000088947	Gm23257	4	43692686	43692817	43692686	1	predicted gene, 23257 [Source:MGI Symbol;Acc:MGI:5453034]
ENSMUSG00000034116.17	64.5886	-0.598052	0.295102	-2.02659	0.042704	0.598153	ENSMUSG00000034116.17	ENSMUSG00000034116	Vav1	17	57279100	57328031	57279100	1	vav 1 oncogene [Source:MGI Symbol;Acc:MGI:98923]
ENSMUSG00000031342.17	11830.2	-0.151458	0.0747559	-2.02603	0.0427616	0.598153	ENSMUSG00000031342.17	ENSMUSG00000031342	Gpm6b	X	166238911	166388988	166238911	1	glycoprotein m6b [Source:MGI Symbol;Acc:MGI:107672]
ENSMUSG00000035722.15	11053.6	0.110853	0.054716	2.02598	0.0427671	0.598153	ENSMUSG00000035722.15	ENSMUSG00000035722	Abca7	10	79996494	80015572	79996494	1	ATP-binding cassette, sub-family A (ABC1), member 7 [Source:MGI Symbol;Acc:MGI:1351646]
ENSMUSG00000004891.16	2190.78	-0.220453	0.10882	-2.02584	0.0427812	0.598153	ENSMUSG00000004891.16	ENSMUSG00000004891	Nes	3	87971078	87980451	87971078	1	nestin [Source:MGI Symbol;Acc:MGI:101784]
ENSMUSG00000028923.14	839.772	-0.183491	0.0905824	-2.02568	0.0427978	0.598153	ENSMUSG00000028923.14	ENSMUSG00000028923	Necap2	4	141066512	141078357	141078342	-1	NECAP endocytosis associated 2 [Source:MGI Symbol;Acc:MGI:1913397]
ENSMUSG00000030532.6	173.754	-0.427848	0.211241	-2.02541	0.0428256	0.598153	ENSMUSG00000030532.6	ENSMUSG00000030532	Hddc3	7	80343104	80350547	80343104	1	HD domain containing 3 [Source:MGI Symbol;Acc:MGI:1915945]
ENSMUSG00000050010.8	647.653	-0.243185	0.120083	-2.02514	0.0428527	0.598153	ENSMUSG00000050010.8	ENSMUSG00000050010	Shisa3	5	67607882	67623552	67607882	1	shisa family member 3 [Source:MGI Symbol;Acc:MGI:3041225]
ENSMUSG00000057147.13	1202.31	0.168912	0.0834152	2.02495	0.042872	0.598153	ENSMUSG00000057147.13	ENSMUSG00000057147	Dph6	2	114516416	114654964	114654964	-1	diphthamine biosynthesis 6 [Source:MGI Symbol;Acc:MGI:1913882]
ENSMUSG00000017466.9	59168.7	0.0952115	0.0470215	2.02485	0.0428827	0.598153	ENSMUSG00000017466.9	ENSMUSG00000017466	Timp2	11	118301069	118355740	118355506	-1	tissue inhibitor of metalloproteinase 2 [Source:MGI Symbol;Acc:MGI:98753]
ENSMUSG00000007122.11	679.459	-1.9099	0.943405	-2.02447	0.0429214	0.598233	ENSMUSG00000007122.11	ENSMUSG00000007122	Casq1	1	172209894	172219868	172219868	-1	calsequestrin 1 [Source:MGI Symbol;Acc:MGI:1309468]
ENSMUSG00000027180.12	5371.69	0.0958135	0.0473601	2.02309	0.0430643	0.599765	ENSMUSG00000027180.12	ENSMUSG00000027180	Fbxo3	2	104027721	104063240	104027721	1	F-box protein 3 [Source:MGI Symbol;Acc:MGI:1929084]
ENSMUSG00000053110.13	1225.84	-0.210672	0.104186	-2.02207	0.0431687	0.600759	ENSMUSG00000053110.13	ENSMUSG00000053110	Yap1	9	7931999	8004596	8004588	-1	yes-associated protein 1 [Source:MGI Symbol;Acc:MGI:103262]
ENSMUSG00000026100.6	27.4121	-0.926887	0.458556	-2.02132	0.043247	0.601388	ENSMUSG00000026100.6	ENSMUSG00000026100	Mstn	1	53061640	53068079	53061640	1	myostatin [Source:MGI Symbol;Acc:MGI:95691]
ENSMUSG00000074259.10	354.058	0.276703	0.136965	2.02024	0.0433582	0.602424	ENSMUSG00000074259.10	ENSMUSG00000074259	Gramd2	9	59680144	59718874	59680144	1	GRAM domain containing 2 [Source:MGI Symbol;Acc:MGI:3528937]
ENSMUSG00000017897.18	421.476	-0.255916	0.126694	-2.01996	0.0433878	0.602424	ENSMUSG00000017897.18	ENSMUSG00000017897	Eya2	2	165595032	165771727	165655298	1	EYA transcriptional coactivator and phosphatase 2 [Source:MGI Symbol;Acc:MGI:109341]
ENSMUSG00000036667.14	13229.7	0.0791842	0.0392388	2.01801	0.0435906	0.604777	ENSMUSG00000036667.14	ENSMUSG00000036667	Tcaf1	6	42668002	42710088	42710088	-1	TRPM8 channel-associated factor 1 [Source:MGI Symbol;Acc:MGI:1914665]
ENSMUSG00000022148.16	113.808	-0.571016	0.283022	-2.01757	0.0436361	0.604947	ENSMUSG00000022148.16	ENSMUSG00000022148	Fyb	15	6522853	6663313	6522853	1	FYN binding protein [Source:MGI Symbol;Acc:MGI:1346327]
ENSMUSG00000032350.9	2785.76	0.115521	0.0572793	2.0168	0.0437165	0.6056	ENSMUSG00000032350.9	ENSMUSG00000032350	Gclc	9	77754535	77794485	77754535	1	glutamate-cysteine ligase, catalytic subunit [Source:MGI Symbol;Acc:MGI:104990]
ENSMUSG00000030536.10	2323.49	-0.141437	0.0701631	-2.01584	0.0438168	0.606528	ENSMUSG00000030536.10	ENSMUSG00000030536	Iqgap1	7	80711583	80825974	80816819	-1	IQ motif containing GTPase activating protein 1 [Source:MGI Symbol;Acc:MGI:1352757]
ENSMUSG00000027611.12	112.55	-0.504299	0.250324	-2.01459	0.0439481	0.607443	ENSMUSG00000027611.12	ENSMUSG00000027611	Procr	2	155751117	155755471	155751117	1	protein C receptor, endothelial [Source:MGI Symbol;Acc:MGI:104596]
ENSMUSG00000023829.9	3.43642	-3.38626	1.68097	-2.01447	0.0439603	NA	ENSMUSG00000023829.9	ENSMUSG00000023829	Slc22a1	17	12648869	12675829	12675696	-1	solute carrier family 22 (organic cation transporter), member 1 [Source:MGI Symbol;Acc:MGI:108111]
ENSMUSG00000052331.14	745.511	0.221757	0.11011	2.01396	0.0440141	0.607443	ENSMUSG00000052331.14	ENSMUSG00000052331	Ankrd44	1	54645340	54926387	54648613	-1	ankyrin repeat domain 44 [Source:MGI Symbol;Acc:MGI:3045243]
ENSMUSG00000026395.16	173.627	-0.459543	0.228263	-2.01321	0.0440922	0.607443	ENSMUSG00000026395.16	ENSMUSG00000026395	Ptprc	1	138062861	138175708	138116441	-1	protein tyrosine phosphatase, receptor type, C [Source:MGI Symbol;Acc:MGI:97810]
ENSMUSG00000079293.11	40.4076	-0.808331	0.401527	-2.01314	0.0440998	0.607443	ENSMUSG00000079293.11	ENSMUSG00000079293	Clec7a	6	129461591	129472779	129472772	-1	C-type lectin domain family 7, member a [Source:MGI Symbol;Acc:MGI:1861431]
ENSMUSG00000100985.1	33.343	-1.02046	0.506921	-2.01306	0.0441079	0.607443	ENSMUSG00000100985.1	ENSMUSG00000100985	Gm10640	7	31155668	31170641	31155668	1	predicted gene 10640 [Source:MGI Symbol;Acc:MGI:3648835]
ENSMUSG00000040667.11	2824.95	0.133842	0.0664948	2.01282	0.0441332	0.607443	ENSMUSG00000040667.11	ENSMUSG00000040667	Nup88	11	70943058	70969973	70969959	-1	nucleoporin 88 [Source:MGI Symbol;Acc:MGI:104900]
ENSMUSG00000014856.12	943.798	-0.164443	0.0816998	-2.01278	0.0441381	0.607443	ENSMUSG00000014856.12	ENSMUSG00000014856	Tmem208	8	105326354	105335219	105326354	1	transmembrane protein 208 [Source:MGI Symbol;Acc:MGI:1913570]
ENSMUSG00000071713.6	163.4	-0.504381	0.250648	-2.01231	0.044187	0.607443	ENSMUSG00000071713.6	ENSMUSG00000071713	Csf2rb	15	78325752	78353847	78325752	1	colony stimulating factor 2 receptor, beta, low-affinity (granulocyte-macrophage) [Source:MGI Symbol;Acc:MGI:1339759]
ENSMUSG00000086841.1	295.196	-0.294312	0.146326	-2.01134	0.0442895	0.607443	ENSMUSG00000086841.1	ENSMUSG00000086841	2410006H16Rik	11	62602877	62604807	62602877	1	RIKEN cDNA 2410006H16 gene [Source:MGI Symbol;Acc:MGI:1916471]
ENSMUSG00000086370.9	201.785	-0.387531	0.192698	-2.01108	0.0443171	0.607443	ENSMUSG00000086370.9	ENSMUSG00000086370	Ftx	X	103560907	103623790	103623754	-1	Ftx transcript, Xist regulator (non-protein coding) [Source:MGI Symbol;Acc:MGI:1926128]
ENSMUSG00000028096.13	2303.55	-0.120176	0.0597585	-2.01104	0.0443217	0.607443	ENSMUSG00000028096.13	ENSMUSG00000028096	Gpr89	3	96868281	96905346	96905346	-1	G protein-coupled receptor 89 [Source:MGI Symbol;Acc:MGI:1914799]
ENSMUSG00000103864.1	10.0705	-1.54729	0.769465	-2.01086	0.0443401	0.607443	ENSMUSG00000103864.1	ENSMUSG00000103864	Gm37415	5	124424697	124426879	124424697	1	predicted gene, 37415 [Source:MGI Symbol;Acc:MGI:5610643]
ENSMUSG00000037469.11	121.436	-0.452401	0.224988	-2.01077	0.0443492	0.607443	ENSMUSG00000037469.11	ENSMUSG00000037469	Acp7	7	28607276	28631332	28630568	-1	acid phosphatase 7, tartrate resistant [Source:MGI Symbol;Acc:MGI:2142121]
ENSMUSG00000063870.12	12001.1	0.0799171	0.0397447	2.01076	0.0443509	0.607443	ENSMUSG00000063870.12	ENSMUSG00000063870	Chd4	6	125095981	125130591	125095981	1	chromodomain helicase DNA binding protein 4 [Source:MGI Symbol;Acc:MGI:1344380]
ENSMUSG00000001065.15	933.987	0.179879	0.0894784	2.01031	0.0443986	0.607639	ENSMUSG00000001065.15	ENSMUSG00000001065	Zfp276	8	123254195	123269745	123254195	1	zinc finger protein (C2H2 type) 276 [Source:MGI Symbol;Acc:MGI:1888495]
ENSMUSG00000107585.1	3.887	-3.46343	1.72339	-2.00967	0.0444665	NA	ENSMUSG00000107585.1	ENSMUSG00000107585	3300002P13Rik	7	3421665	3423445	3423445	-1	RIKEN cDNA 3300002P13 gene [Source:MGI Symbol;Acc:MGI:1917480]
ENSMUSG00000022525.13	491.742	0.224855	0.111895	2.00952	0.0444822	0.608325	ENSMUSG00000022525.13	ENSMUSG00000022525	Plaat1	16	29209695	29230531	29209695	1	phospholipase A and acyltransferase 1 [Source:MGI Symbol;Acc:MGI:1351473]
ENSMUSG00000053279.8	654.664	-0.210612	0.104834	-2.00901	0.0445364	0.608494	ENSMUSG00000053279.8	ENSMUSG00000053279	Aldh1a1	19	20492715	20643465	20492715	1	aldehyde dehydrogenase family 1, subfamily A1 [Source:MGI Symbol;Acc:MGI:1353450]
ENSMUSG00000039128.13	2740.5	0.151634	0.0754861	2.00877	0.0445615	0.608494	ENSMUSG00000039128.13	ENSMUSG00000039128	Cdc123	2	5794294	5845164	5845164	-1	cell division cycle 123 [Source:MGI Symbol;Acc:MGI:2138811]
ENSMUSG00000020183.11	70.9821	0.661929	0.329716	2.00757	0.0446889	0.609775	ENSMUSG00000020183.11	ENSMUSG00000020183	Cpm	10	117629500	117687352	117629500	1	carboxypeptidase M [Source:MGI Symbol;Acc:MGI:1917824]
ENSMUSG00000085237.2	1.74616	4.21571	2.10099	2.00653	0.0447993	NA	ENSMUSG00000085237.2	ENSMUSG00000085237	Gm15406	5	148948897	148996566	148996566	-1	predicted gene 15406 [Source:MGI Symbol;Acc:MGI:3705112]
ENSMUSG00000045991.19	3478.68	0.13889	0.0692249	2.00635	0.0448187	0.610805	ENSMUSG00000045991.19	ENSMUSG00000045991	Onecut2	18	64340020	64400987	64340020	1	one cut domain, family member 2 [Source:MGI Symbol;Acc:MGI:1891408]
ENSMUSG00000032013.6	9.32639	2.08215	1.03789	2.00614	0.0448408	0.610805	ENSMUSG00000032013.6	ENSMUSG00000032013	Trim29	9	43310848	43336115	43310848	1	tripartite motif-containing 29 [Source:MGI Symbol;Acc:MGI:1919419]
ENSMUSG00000051243.14	537.725	0.319111	0.159085	2.00592	0.0448652	0.610805	ENSMUSG00000051243.14	ENSMUSG00000051243	Islr2	9	58196297	58204319	58201715	-1	immunoglobulin superfamily containing leucine-rich repeat 2 [Source:MGI Symbol;Acc:MGI:2444277]
ENSMUSG00000062372.13	7.41552	-1.93529	0.965061	-2.00536	0.0449251	0.611163	ENSMUSG00000062372.13	ENSMUSG00000062372	Otof	5	30367062	30461932	30461902	-1	otoferlin [Source:MGI Symbol;Acc:MGI:1891247]
ENSMUSG00000050587.14	1110.71	-0.172856	0.0862511	-2.0041	0.0450589	0.612029	ENSMUSG00000050587.14	ENSMUSG00000050587	Lrrc4c	2	96318169	97631666	96318169	1	leucine rich repeat containing 4C [Source:MGI Symbol;Acc:MGI:2442636]
ENSMUSG00000046159.16	148.431	-0.478884	0.238977	-2.00389	0.0450821	0.612029	ENSMUSG00000046159.16	ENSMUSG00000046159	Chrm3	13	9875486	10360847	10360844	-1	cholinergic receptor, muscarinic 3, cardiac [Source:MGI Symbol;Acc:MGI:88398]
ENSMUSG00000014776.7	8136.94	0.110032	0.0549143	2.0037	0.0451026	0.612029	ENSMUSG00000014776.7	ENSMUSG00000014776	Nol3	8	105276140	105281939	105276140	1	nucleolar protein 3 (apoptosis repressor with CARD domain) [Source:MGI Symbol;Acc:MGI:1925938]
ENSMUSG00000025477.14	1341.47	0.147431	0.0735866	2.0035	0.0451234	0.612029	ENSMUSG00000025477.14	ENSMUSG00000025477	Inpp5a	7	139389109	139579652	139389109	1	inositol polyphosphate-5-phosphatase A [Source:MGI Symbol;Acc:MGI:2686961]
ENSMUSG00000031790.8	10280.1	-0.0801848	0.0400421	-2.00251	0.0452299	0.612685	ENSMUSG00000031790.8	ENSMUSG00000031790	Mmp15	8	95352268	95375080	95352268	1	matrix metallopeptidase 15 [Source:MGI Symbol;Acc:MGI:109320]
ENSMUSG00000033629.6	10760.4	0.107734	0.0538119	2.00205	0.0452797	0.612685	ENSMUSG00000033629.6	ENSMUSG00000033629	Hacd3	9	64986983	65021693	65021693	-1	3-hydroxyacyl-CoA dehydratase 3 [Source:MGI Symbol;Acc:MGI:1889341]
ENSMUSG00000030772.6	9189.52	0.145661	0.0727834	2.00129	0.0453611	0.612685	ENSMUSG00000030772.6	ENSMUSG00000030772	Dkk3	7	112116017	112159057	112159057	-1	dickkopf WNT signaling pathway inhibitor 3 [Source:MGI Symbol;Acc:MGI:1354952]
ENSMUSG00000048222.3	2822.8	0.110676	0.0553136	2.00087	0.0454061	0.612685	ENSMUSG00000048222.3	ENSMUSG00000048222	Mfap1b	2	121460235	121474067	121474067	-1	microfibrillar-associated protein 1B [Source:MGI Symbol;Acc:MGI:3694697]
ENSMUSG00000043190.14	759.136	-0.222224	0.111077	-2.00063	0.0454322	0.612685	ENSMUSG00000043190.14	ENSMUSG00000043190	Rfesd	13	76001535	76018719	76018562	-1	Rieske (Fe-S) domain containing [Source:MGI Symbol;Acc:MGI:2145198]
ENSMUSG00000026705.16	3011.71	0.114994	0.0575001	1.99989	0.0455119	0.612685	ENSMUSG00000026705.16	ENSMUSG00000026705	Klhl20	1	161088375	161131511	161131511	-1	kelch-like 20 [Source:MGI Symbol;Acc:MGI:2444855]
ENSMUSG00000038718.15	674.131	0.199959	0.0999921	1.99975	0.0455272	0.612685	ENSMUSG00000038718.15	ENSMUSG00000038718	Pbx3	2	34171457	34373142	34372038	-1	pre B cell leukemia homeobox 3 [Source:MGI Symbol;Acc:MGI:97496]
ENSMUSG00000063535.7	31.8686	-0.841437	0.420772	-1.99975	0.0455278	0.612685	ENSMUSG00000063535.7	ENSMUSG00000063535	Zfp773	7	7127073	7136755	7136724	-1	zinc finger protein 773 [Source:MGI Symbol;Acc:MGI:1923623]
ENSMUSG00000060961.16	4033.42	0.130002	0.0650167	1.99952	0.0455518	0.612685	ENSMUSG00000060961.16	ENSMUSG00000060961	Slc4a4	5	88886486	89239653	88886486	1	solute carrier family 4 (anion exchanger), member 4 [Source:MGI Symbol;Acc:MGI:1927555]
ENSMUSG00000032503.18	1184.94	0.201517	0.100794	1.9993	0.0455761	0.612685	ENSMUSG00000032503.18	ENSMUSG00000032503	Arpp21	9	112065091	112235938	112185769	-1	cyclic AMP-regulated phosphoprotein, 21 [Source:MGI Symbol;Acc:MGI:107562]
ENSMUSG00000046722.14	3201.08	0.119258	0.0596526	1.99921	0.0455856	0.612685	ENSMUSG00000046722.14	ENSMUSG00000046722	Cdc42se1	3	95228732	95236409	95228732	1	CDC42 small effector 1 [Source:MGI Symbol;Acc:MGI:1889510]
ENSMUSG00000032855.6	4646.75	-0.127946	0.064001	-1.99912	0.045595	0.612685	ENSMUSG00000032855.6	ENSMUSG00000032855	Pkd1	17	24549834	24596508	24549834	1	polycystin 1, transient receptor poteintial channel interacting [Source:MGI Symbol;Acc:MGI:97603]
ENSMUSG00000002625.10	1919.62	-0.123892	0.0619843	-1.99877	0.0456333	0.612685	ENSMUSG00000002625.10	ENSMUSG00000002625	Akap8l	17	32321424	32350607	32350575	-1	A kinase (PRKA) anchor protein 8-like [Source:MGI Symbol;Acc:MGI:1860606]
ENSMUSG00000023328.14	6090.02	0.135766	0.0679279	1.99867	0.0456437	0.612685	ENSMUSG00000023328.14	ENSMUSG00000023328	Ache	5	137287519	137294466	137287519	1	acetylcholinesterase [Source:MGI Symbol;Acc:MGI:87876]
ENSMUSG00000109378.1	138.352	-0.409365	0.204959	-1.9973	0.0457924	0.613479	ENSMUSG00000109378.1	ENSMUSG00000109378	Gm49396	7	30563344	30567960	30563344	1	predicted gene, 49396 [Source:MGI Symbol;Acc:MGI:6121629]
ENSMUSG00000022658.10	13764.4	0.0815588	0.0408389	1.99709	0.0458155	0.613479	ENSMUSG00000022658.10	ENSMUSG00000022658	Tagln3	16	45711230	45724608	45724608	-1	transgelin 3 [Source:MGI Symbol;Acc:MGI:1926784]
ENSMUSG00000086224.8	6.92548	1.92597	0.964436	1.99699	0.0458265	0.613479	ENSMUSG00000086224.8	ENSMUSG00000086224	2700069I18Rik	3	5177586	5220841	5220823	-1	RIKEN cDNA 2700069I18 gene [Source:MGI Symbol;Acc:MGI:1919858]
ENSMUSG00000075324.13	493.965	-0.238882	0.119627	-1.99688	0.0458379	0.613479	ENSMUSG00000075324.13	ENSMUSG00000075324	Fign	2	63971507	64098038	64098012	-1	fidgetin [Source:MGI Symbol;Acc:MGI:1890647]
ENSMUSG00000017307.16	414.258	-0.247224	0.123867	-1.99589	0.0459461	0.613935	ENSMUSG00000017307.16	ENSMUSG00000017307	Acot8	2	164792765	164804882	164804881	-1	acyl-CoA thioesterase 8 [Source:MGI Symbol;Acc:MGI:2158201]
ENSMUSG00000074486.2	12.8421	1.47383	0.738469	1.99579	0.0459563	0.613935	ENSMUSG00000074486.2	ENSMUSG00000074486	Bglap2	3	88377736	88378699	88378699	-1	bone gamma-carboxyglutamate protein 2 [Source:MGI Symbol;Acc:MGI:88157]
ENSMUSG00000023827.8	2431.29	-0.151997	0.0761648	-1.99564	0.0459733	0.613935	ENSMUSG00000023827.8	ENSMUSG00000023827	Agpat4	17	12118704	12219645	12118704	1	1-acylglycerol-3-phosphate O-acyltransferase 4 (lysophosphatidic acid acyltransferase, delta) [Source:MGI Symbol;Acc:MGI:1915512]
ENSMUSG00000037366.14	964.676	-0.210864	0.105698	-1.99496	0.0460468	0.614465	ENSMUSG00000037366.14	ENSMUSG00000037366	Pafah2	4	134396320	134427413	134396320	1	platelet-activating factor acetylhydrolase 2 [Source:MGI Symbol;Acc:MGI:2140321]
ENSMUSG00000001924.15	30625.7	0.0903367	0.0453136	1.99359	0.046197	0.614917	ENSMUSG00000001924.15	ENSMUSG00000001924	Uba1	X	20658326	20683179	20658326	1	ubiquitin-like modifier activating enzyme 1 [Source:MGI Symbol;Acc:MGI:98890]
ENSMUSG00000103409.2	25.8353	-0.932971	0.468017	-1.99345	0.0462118	0.614917	ENSMUSG00000103409.2	ENSMUSG00000103409	Lsmem2	9	107592630	107597075	107594425	-1	leucine-rich single-pass membrane protein 2 [Source:MGI Symbol;Acc:MGI:3612240]
ENSMUSG00000039176.17	2712.03	-0.161571	0.0810569	-1.99331	0.0462278	0.614917	ENSMUSG00000039176.17	ENSMUSG00000039176	Polg	7	79446231	79466362	79466362	-1	polymerase (DNA directed), gamma [Source:MGI Symbol;Acc:MGI:1196389]
ENSMUSG00000027748.11	283.596	0.334108	0.16767	1.99265	0.0462999	0.614917	ENSMUSG00000027748.11	ENSMUSG00000027748	Trpc4	3	54156035	54318471	54156035	1	transient receptor potential cation channel, subfamily C, member 4 [Source:MGI Symbol;Acc:MGI:109525]
ENSMUSG00000061143.15	523.305	0.211025	0.105915	1.99239	0.0463277	0.614917	ENSMUSG00000061143.15	ENSMUSG00000061143	Maml3	3	51685907	52105076	51796536	-1	mastermind like transcriptional coactivator 3 [Source:MGI Symbol;Acc:MGI:2389461]
ENSMUSG00000020573.17	80.1632	-0.579187	0.29071	-1.99232	0.0463361	0.614917	ENSMUSG00000020573.17	ENSMUSG00000020573	Pik3cg	12	32173473	32208659	32208611	-1	phosphatidylinositol-4,5-bisphosphate 3-kinase catalytic subunit gamma [Source:MGI Symbol;Acc:MGI:1353576]
ENSMUSG00000055184.4	49.9445	0.689651	0.346215	1.99197	0.0463738	0.614917	ENSMUSG00000055184.4	ENSMUSG00000055184	Fam72a	1	131527903	131539872	131527903	1	family with sequence similarity 72, member A [Source:MGI Symbol;Acc:MGI:1919669]
ENSMUSG00000043155.4	126.193	0.422653	0.212188	1.99188	0.0463843	0.614917	ENSMUSG00000043155.4	ENSMUSG00000043155	Hpdl	4	116819904	116821707	116821707	-1	4-hydroxyphenylpyruvate dioxygenase-like [Source:MGI Symbol;Acc:MGI:2444646]
ENSMUSG00000024112.16	3283.56	0.144457	0.0725237	1.99186	0.0463869	0.614917	ENSMUSG00000024112.16	ENSMUSG00000024112	Cacna1h	17	25374285	25433783	25433783	-1	calcium channel, voltage-dependent, T type, alpha 1H subunit [Source:MGI Symbol;Acc:MGI:1928842]
ENSMUSG00000050944.14	60.6333	-0.871171	0.43744	-1.99152	0.0464235	0.614917	ENSMUSG00000050944.14	ENSMUSG00000050944	Efcab5	11	77089915	77188968	77188968	-1	EF-hand calcium binding domain 5 [Source:MGI Symbol;Acc:MGI:2442440]
ENSMUSG00000030619.10	607.971	-0.222431	0.111707	-1.9912	0.046459	0.614917	ENSMUSG00000030619.10	ENSMUSG00000030619	Eed	7	89954654	89980983	89980983	-1	embryonic ectoderm development [Source:MGI Symbol;Acc:MGI:95286]
ENSMUSG00000045761.16	309.083	-0.342876	0.172218	-1.99095	0.0464867	0.614917	ENSMUSG00000045761.16	ENSMUSG00000045761	Togaram2	17	71673261	71729669	71673261	1	TOG array regulator of axonemal microtubules 2 [Source:MGI Symbol;Acc:MGI:2443498]
ENSMUSG00000059195.10	18.0031	-1.5121	0.759729	-1.99032	0.0465558	0.615301	ENSMUSG00000059195.10	ENSMUSG00000059195	Gm12715	4	103563402	103564529	103563402	1	predicted gene 12715 [Source:MGI Symbol;Acc:MGI:3650759]
ENSMUSG00000067786.16	886.01	-0.268438	0.134893	-1.99	0.0465908	0.615301	ENSMUSG00000067786.16	ENSMUSG00000067786	Nnat	2	157560078	157562522	157560078	1	neuronatin [Source:MGI Symbol;Acc:MGI:104716]
ENSMUSG00000097891.1	2.89808	4.93511	2.4806	1.98949	0.0466475	NA	ENSMUSG00000097891.1	ENSMUSG00000097891	Gm3650	18	43472816	43475169	43472816	1	predicted gene 3650 [Source:MGI Symbol;Acc:MGI:3781826]
ENSMUSG00000086212.7	106.822	0.497915	0.250275	1.98947	0.0466489	0.615301	ENSMUSG00000086212.7	ENSMUSG00000086212	Mkln1os	6	31366885	31398773	31398773	-1	muskelin 1, intracellular mediator containing kelch motifs, opposite strand [Source:MGI Symbol;Acc:MGI:3651306]
ENSMUSG00000090958.2	230.959	-0.328859	0.165301	-1.98945	0.0466512	0.615301	ENSMUSG00000090958.2	ENSMUSG00000090958	Lrrc32	7	98489283	98502181	98489283	1	leucine rich repeat containing 32 [Source:MGI Symbol;Acc:MGI:93882]
ENSMUSG00000020528.14	1167.31	0.151013	0.0759242	1.98899	0.0467023	0.615529	ENSMUSG00000020528.14	ENSMUSG00000020528	Prpsap2	11	61729650	61762088	61762012	-1	phosphoribosyl pyrophosphate synthetase-associated protein 2 [Source:MGI Symbol;Acc:MGI:2384838]
ENSMUSG00000053797.10	2.05637	-4.52764	2.27668	-1.9887	0.046734	NA	ENSMUSG00000053797.10	ENSMUSG00000053797	Krt16	11	100246091	100248902	100248902	-1	keratin 16 [Source:MGI Symbol;Acc:MGI:96690]
ENSMUSG00000070420.4	423.387	-0.233869	0.117633	-1.98813	0.0467971	0.616208	ENSMUSG00000070420.4	ENSMUSG00000070420	Zscan25	5	145280500	145291278	145280500	1	zinc finger and SCAN domain containing 25 [Source:MGI Symbol;Acc:MGI:3647079]
ENSMUSG00000001829.17	2916.42	-0.123757	0.0622548	-1.98791	0.0468217	0.616208	ENSMUSG00000001829.17	ENSMUSG00000001829	Clpb	7	101663633	101795506	101663633	1	ClpB caseinolytic peptidase B [Source:MGI Symbol;Acc:MGI:1100517]
ENSMUSG00000052414.9	2.84854	4.92361	2.47706	1.98768	0.0468471	NA	ENSMUSG00000052414.9	ENSMUSG00000052414	Gm28047	15	102523843	102625067	102625067	-1	predicted gene, 28047 [Source:MGI Symbol;Acc:MGI:5547783]
ENSMUSG00000090386.10	81.3678	-0.62097	0.312524	-1.98695	0.0469276	0.617018	ENSMUSG00000090386.10	ENSMUSG00000090386	Mir99ahg	16	77236317	77773427	77236317	1	Mir99a and Mirlet7c-1 host gene (non-protein coding) [Source:MGI Symbol;Acc:MGI:1919929]
ENSMUSG00000020802.8	15278.6	0.0969344	0.0488017	1.98629	0.0470008	0.617018	ENSMUSG00000020802.8	ENSMUSG00000020802	Ube2o	11	116537740	116581447	116581447	-1	ubiquitin-conjugating enzyme E2O [Source:MGI Symbol;Acc:MGI:2444266]
ENSMUSG00000048424.17	44.066	-0.733495	0.369357	-1.98587	0.0470477	0.617018	ENSMUSG00000048424.17	ENSMUSG00000048424	Ranbp3l	15	8967949	9067335	8967949	1	RAN binding protein 3-like [Source:MGI Symbol;Acc:MGI:2444654]
ENSMUSG00000020300.14	3978.28	0.116558	0.0586958	1.9858	0.0470551	0.617018	ENSMUSG00000020300.14	ENSMUSG00000020300	Cpeb4	11	31872211	31935634	31872226	1	cytoplasmic polyadenylation element binding protein 4 [Source:MGI Symbol;Acc:MGI:1914829]
ENSMUSG00000023009.14	2390.37	-0.125131	0.0630186	-1.98562	0.0470759	0.617018	ENSMUSG00000023009.14	ENSMUSG00000023009	Nckap5l	15	99422035	99457748	99457748	-1	NCK-associated protein 5-like [Source:MGI Symbol;Acc:MGI:3609653]
ENSMUSG00000104548.1	19.0336	-1.10902	0.558552	-1.98552	0.0470869	0.617018	ENSMUSG00000104548.1	ENSMUSG00000104548	Gm43857	3	152391162	152394240	152394240	-1	predicted gene 43857 [Source:MGI Symbol;Acc:MGI:5663994]
ENSMUSG00000025172.3	32.6614	-1.16982	0.589578	-1.98416	0.0472376	0.61757	ENSMUSG00000025172.3	ENSMUSG00000025172	Ankrd2	19	42036000	42045110	42036000	1	ankyrin repeat domain 2 (stretch responsive muscle) [Source:MGI Symbol;Acc:MGI:1861447]
ENSMUSG00000040729.8	846.145	0.208021	0.104851	1.98396	0.0472606	0.61757	ENSMUSG00000040729.8	ENSMUSG00000040729	Cep126	9	8076461	8134294	8134294	-1	centrosomal protein 126 [Source:MGI Symbol;Acc:MGI:2680221]
ENSMUSG00000026424.8	3475.73	-0.13476	0.0679367	-1.98361	0.047299	0.61757	ENSMUSG00000026424.8	ENSMUSG00000026424	Gpr37l1	1	135160234	135167681	135167681	-1	G protein-coupled receptor 37-like 1 [Source:MGI Symbol;Acc:MGI:1928503]
ENSMUSG00000094365.1	6.94557	-2.69303	1.35769	-1.98354	0.0473074	0.61757	ENSMUSG00000094365.1	ENSMUSG00000094365	Gm21982	7	30641001	30664937	30664937	-1	predicted gene 21982 [Source:MGI Symbol;Acc:MGI:5439451]
ENSMUSG00000004945.15	2231.64	-0.138995	0.0700755	-1.98351	0.0473105	0.61757	ENSMUSG00000004945.15	ENSMUSG00000004945	Tmem242	17	5410870	5440259	5440243	-1	transmembrane protein 242 [Source:MGI Symbol;Acc:MGI:1917794]
ENSMUSG00000026740.12	843.603	-0.23877	0.120418	-1.98285	0.0473843	0.61757	ENSMUSG00000026740.12	ENSMUSG00000026740	Dnajc1	2	18195654	18392830	18219557	-1	DnaJ heat shock protein family (Hsp40) member C1 [Source:MGI Symbol;Acc:MGI:103268]
ENSMUSG00000066361.3	182.437	0.386248	0.194862	1.98216	0.0474612	0.61757	ENSMUSG00000066361.3	ENSMUSG00000066361	Serpina3c	12	104146382	104153870	104153870	-1	serine (or cysteine) peptidase inhibitor, clade A, member 3C [Source:MGI Symbol;Acc:MGI:102848]
ENSMUSG00000041390.18	552.42	-0.211037	0.106474	-1.98205	0.0474741	0.61757	ENSMUSG00000041390.18	ENSMUSG00000041390	Mdfic	6	15720661	15802169	15720661	1	MyoD family inhibitor domain containing [Source:MGI Symbol;Acc:MGI:104611]
ENSMUSG00000046574.8	2423.28	0.127207	0.0641866	1.98183	0.0474985	0.61757	ENSMUSG00000046574.8	ENSMUSG00000046574	Prr12	7	45027563	45052881	45052881	-1	proline rich 12 [Source:MGI Symbol;Acc:MGI:2679002]
ENSMUSG00000029163.9	237.495	-0.389548	0.19656	-1.98183	0.0474987	0.61757	ENSMUSG00000029163.9	ENSMUSG00000029163	Emilin1	5	30913402	30921277	30913402	1	elastin microfibril interfacer 1 [Source:MGI Symbol;Acc:MGI:1926189]
ENSMUSG00000027346.15	3595.09	-0.109096	0.0550493	-1.98179	0.0475028	0.61757	ENSMUSG00000027346.15	ENSMUSG00000027346	Gpcpd1	2	132529082	132587729	132542031	-1	glycerophosphocholine phosphodiesterase 1 [Source:MGI Symbol;Acc:MGI:104898]
ENSMUSG00000109850.1	1.78356	-4.3206	2.18035	-1.98161	0.0475227	NA	ENSMUSG00000109850.1	ENSMUSG00000109850	Gm45692	8	26119534	26160819	26119534	1	predicted gene 45692 [Source:MGI Symbol;Acc:MGI:5804807]
ENSMUSG00000040651.9	903.074	-0.203488	0.102707	-1.98124	0.0475639	0.617896	ENSMUSG00000040651.9	ENSMUSG00000040651	Tasor	14	27428834	27483555	27428834	1	transcription activation suppressor [Source:MGI Symbol;Acc:MGI:1921694]
ENSMUSG00000022788.16	928.811	0.181914	0.0918336	1.98091	0.0476015	0.617896	ENSMUSG00000022788.16	ENSMUSG00000022788	Fgd4	16	16416917	16600549	16560219	-1	FYVE, RhoGEF and PH domain containing 4 [Source:MGI Symbol;Acc:MGI:2183747]
ENSMUSG00000078784.8	750.108	-0.176354	0.089051	-1.98037	0.0476614	0.617896	ENSMUSG00000078784.8	ENSMUSG00000078784	Rbis	3	14606284	14611285	14611285	-1	ribosomal biogenesis factor [Source:MGI Symbol;Acc:MGI:1916376]
ENSMUSG00000020307.15	2916.51	-0.136017	0.0686834	-1.98035	0.0476638	0.617896	ENSMUSG00000020307.15	ENSMUSG00000020307	Cdc34	10	79682195	79688398	79682195	1	cell division cycle 34 [Source:MGI Symbol;Acc:MGI:102657]
ENSMUSG00000005362.14	9283.14	0.0965049	0.0487505	1.97957	0.0477522	0.618121	ENSMUSG00000005362.14	ENSMUSG00000005362	Crbn	6	106780201	106800077	106800065	-1	cereblon [Source:MGI Symbol;Acc:MGI:1913277]
ENSMUSG00000025545.10	819.485	0.19453	0.0983072	1.9788	0.0478389	0.618121	ENSMUSG00000025545.10	ENSMUSG00000025545	Clybl	14	122181704	122402234	122181704	1	citrate lyase beta like [Source:MGI Symbol;Acc:MGI:1916884]
ENSMUSG00000074219.3	18.2478	-1.29839	0.65616	-1.97877	0.0478415	0.618121	ENSMUSG00000074219.3	ENSMUSG00000074219	Gm10644	8	83932329	83955343	83955205	-1	predicted gene 10644 [Source:MGI Symbol;Acc:MGI:3704314]
ENSMUSG00000052085.7	546.6	-0.350722	0.177246	-1.97873	0.0478463	0.618121	ENSMUSG00000052085.7	ENSMUSG00000052085	Dock8	19	24999534	25202432	24999534	1	dedicator of cytokinesis 8 [Source:MGI Symbol;Acc:MGI:1921396]
ENSMUSG00000002346.16	720.015	-0.188757	0.0954054	-1.97848	0.047875	0.618121	ENSMUSG00000002346.16	ENSMUSG00000002346	Slc25a42	8	70184340	70212305	70212305	-1	solute carrier family 25, member 42 [Source:MGI Symbol;Acc:MGI:1920345]
ENSMUSG00000041343.19	735.55	0.187442	0.0947451	1.97839	0.0478853	0.618121	ENSMUSG00000041343.19	ENSMUSG00000041343	Ankrd42	7	92581723	92637142	92637102	-1	ankyrin repeat domain 42 [Source:MGI Symbol;Acc:MGI:1921095]
ENSMUSG00000094013.1	55.7703	1.17702	0.595093	1.97787	0.0479432	0.61843	ENSMUSG00000094013.1	ENSMUSG00000094013	Gm25829	1	54249102	54249208	54249208	-1	predicted gene, 25829 [Source:MGI Symbol;Acc:MGI:5455606]
ENSMUSG00000056032.12	4.40447	-3.11496	1.575	-1.97776	0.0479562	NA	ENSMUSG00000056032.12	ENSMUSG00000056032	BC018473	11	116752167	116759373	116752167	1	cDNA sequence BC018473 [Source:MGI Symbol;Acc:MGI:3039625]
ENSMUSG00000037020.16	246.45	0.353703	0.178946	1.97659	0.0480876	0.618588	ENSMUSG00000037020.16	ENSMUSG00000037020	Wdr62	7	30240138	30280419	30262647	-1	WD repeat domain 62 [Source:MGI Symbol;Acc:MGI:1923696]
ENSMUSG00000070822.5	550.427	-0.215009	0.10878	-1.97655	0.0480929	0.618588	ENSMUSG00000070822.5	ENSMUSG00000070822	Zscan18	7	12768090	12803635	12771116	-1	zinc finger and SCAN domain containing 18 [Source:MGI Symbol;Acc:MGI:3643810]
ENSMUSG00000005672.12	4323.8	0.125471	0.0634942	1.97609	0.0481441	0.618588	ENSMUSG00000005672.12	ENSMUSG00000005672	Kit	5	75574916	75656722	75574916	1	KIT proto-oncogene receptor tyrosine kinase [Source:MGI Symbol;Acc:MGI:96677]
ENSMUSG00000025959.13	17042.6	0.0753711	0.0381471	1.9758	0.0481773	0.618588	ENSMUSG00000025959.13	ENSMUSG00000025959	Klf7	1	64029447	64122282	64121491	-1	Kruppel-like factor 7 (ubiquitous) [Source:MGI Symbol;Acc:MGI:1935151]
ENSMUSG00000030031.14	297.535	0.326796	0.165477	1.97487	0.0482833	0.618588	ENSMUSG00000030031.14	ENSMUSG00000030031	Kbtbd8	6	95117240	95129790	95117240	1	kelch repeat and BTB (POZ) domain containing 8 [Source:MGI Symbol;Acc:MGI:2661430]
ENSMUSG00000068882.13	5024.6	0.111304	0.0563694	1.97456	0.0483185	0.618588	ENSMUSG00000068882.13	ENSMUSG00000068882	Ssb	2	69861562	69871846	69861562	1	Sjogren syndrome antigen B [Source:MGI Symbol;Acc:MGI:98423]
ENSMUSG00000033991.9	1686.82	0.13298	0.0673571	1.97425	0.0483533	0.618588	ENSMUSG00000033991.9	ENSMUSG00000033991	Ttc37	13	76098734	76190316	76098734	1	tetratricopeptide repeat domain 37 [Source:MGI Symbol;Acc:MGI:2679923]
ENSMUSG00000086943.2	9.63756	1.7821	0.902765	1.97405	0.0483763	0.618588	ENSMUSG00000086943.2	ENSMUSG00000086943	4732414G09Rik	11	73015856	73018841	73018804	-1	RIKEN cDNA 4732414G09 gene [Source:MGI Symbol;Acc:MGI:3045381]
ENSMUSG00000017778.14	5071.17	-0.110233	0.0558427	-1.97399	0.0483825	0.618588	ENSMUSG00000017778.14	ENSMUSG00000017778	Cox7c	13	86044816	86046904	86046460	-1	cytochrome c oxidase subunit 7C [Source:MGI Symbol;Acc:MGI:103226]
ENSMUSG00000001098.15	8898.02	0.0941744	0.0477108	1.97386	0.0483976	0.618588	ENSMUSG00000001098.15	ENSMUSG00000001098	Kctd10	5	114363567	114380508	114380508	-1	potassium channel tetramerisation domain containing 10 [Source:MGI Symbol;Acc:MGI:2141207]
ENSMUSG00000022295.8	8020.2	0.0886517	0.0449205	1.97353	0.0484356	0.618588	ENSMUSG00000022295.8	ENSMUSG00000022295	Atp6v1c1	15	38661933	38692446	38661933	1	ATPase, H+ transporting, lysosomal V1 subunit C1 [Source:MGI Symbol;Acc:MGI:1913585]
ENSMUSG00000020070.18	7158.22	0.129839	0.0657966	1.97334	0.0484563	0.618588	ENSMUSG00000020070.18	ENSMUSG00000020070	Rufy2	10	62980223	63017210	63002257	1	RUN and FYVE domain-containing 2 [Source:MGI Symbol;Acc:MGI:1917682]
ENSMUSG00000037211.12	170.956	-0.402797	0.20412	-1.97334	0.0484574	0.618588	ENSMUSG00000037211.12	ENSMUSG00000037211	Spry1	3	37639947	37644598	37639947	1	sprouty RTK signaling antagonist 1 [Source:MGI Symbol;Acc:MGI:1345139]
ENSMUSG00000103174.1	240.902	-0.336742	0.170656	-1.97322	0.0484707	0.618588	ENSMUSG00000103174.1	ENSMUSG00000103174	Gm37168	1	191267178	191288714	191267178	1	predicted gene, 37168 [Source:MGI Symbol;Acc:MGI:5610396]
ENSMUSG00000029782.20	1738.04	0.148949	0.0754916	1.97306	0.048489	0.618588	ENSMUSG00000029782.20	ENSMUSG00000029782	Tmem209	6	30479053	30509783	30509704	-1	transmembrane protein 209 [Source:MGI Symbol;Acc:MGI:1919899]
ENSMUSG00000026341.16	13563.9	0.0807042	0.040907	1.97287	0.0485105	0.618588	ENSMUSG00000026341.16	ENSMUSG00000026341	Actr3	1	125392905	125435727	125435547	-1	ARP3 actin-related protein 3 [Source:MGI Symbol;Acc:MGI:1921367]
ENSMUSG00000000120.6	42706.8	-0.128017	0.0649044	-1.97239	0.0485652	0.618588	ENSMUSG00000000120.6	ENSMUSG00000000120	Ngfr	11	95568818	95587735	95587735	-1	nerve growth factor receptor (TNFR superfamily, member 16) [Source:MGI Symbol;Acc:MGI:97323]
ENSMUSG00000027523.20	101300	0.0783182	0.0397078	1.97236	0.0485681	0.618588	ENSMUSG00000027523.20	ENSMUSG00000027523	Gnas	2	174284320	174346744	174284320	1	GNAS (guanine nucleotide binding protein, alpha stimulating) complex locus [Source:MGI Symbol;Acc:MGI:95777]
ENSMUSG00000005320.9	5.99851	-2.42304	1.22852	-1.97232	0.0485732	NA	ENSMUSG00000005320.9	ENSMUSG00000005320	Fgfr4	13	55152640	55168759	55152640	1	fibroblast growth factor receptor 4 [Source:MGI Symbol;Acc:MGI:95525]
ENSMUSG00000028788.14	6718.11	-0.101063	0.0512599	-1.97158	0.0486581	0.618665	ENSMUSG00000028788.14	ENSMUSG00000028788	Ptp4a2	4	129811219	129850003	129811219	1	protein tyrosine phosphatase 4a2 [Source:MGI Symbol;Acc:MGI:1277117]
ENSMUSG00000103436.1	126.258	-0.582725	0.29559	-1.9714	0.0486786	0.618665	ENSMUSG00000103436.1	ENSMUSG00000103436	Gm36995	X	7558602	7605381	7605381	-1	predicted gene, 36995 [Source:MGI Symbol;Acc:MGI:5610223]
ENSMUSG00000047515.8	24.3674	1.11943	0.567919	1.97111	0.0487117	0.618665	ENSMUSG00000047515.8	ENSMUSG00000047515	BC049715	6	136827626	136840662	136827626	1	cDNA sequence BC049715 [Source:MGI Symbol;Acc:MGI:3605234]
ENSMUSG00000033788.15	5096.94	-0.162613	0.0824986	-1.9711	0.0487122	0.618665	ENSMUSG00000033788.15	ENSMUSG00000033788	Dysf	6	84008590	84211060	84008590	1	dysferlin [Source:MGI Symbol;Acc:MGI:1349385]
ENSMUSG00000118171.1	19.6501	7.70388	3.90897	1.97082	0.0487443	0.618665	ENSMUSG00000118171.1	ENSMUSG00000118171	Gm50390	18	87851450	87852040	87852040	-1	predicted gene, 50390 [Source:MGI Symbol;Acc:MGI:6303294]
ENSMUSG00000090061.9	2991.53	0.178346	0.0905168	1.97031	0.0488034	0.618895	ENSMUSG00000090061.9	ENSMUSG00000090061	Nwd2	5	63649102	63810546	63649102	1	NACHT and WD repeat domain containing 2 [Source:MGI Symbol;Acc:MGI:1920464]
ENSMUSG00000030653.17	69.6927	-4.26578	2.16638	-1.96908	0.0489442	0.618895	ENSMUSG00000030653.17	ENSMUSG00000030653	Gm45837	7	101410886	101512819	101410886	1	predicted gene 45837 [Source:MGI Symbol;Acc:MGI:5804952]
ENSMUSG00000045664.5	1355.26	0.141508	0.0718683	1.96899	0.0489543	0.618895	ENSMUSG00000045664.5	ENSMUSG00000045664	Cdc42ep2	19	5915636	5924816	5924816	-1	CDC42 effector protein (Rho GTPase binding) 2 [Source:MGI Symbol;Acc:MGI:1929744]
ENSMUSG00000024576.14	16830.3	0.079426	0.0403462	1.96861	0.0489975	0.618895	ENSMUSG00000024576.14	ENSMUSG00000024576	Csnk1a1	18	61555274	61590061	61555274	1	casein kinase 1, alpha 1 [Source:MGI Symbol;Acc:MGI:1934950]
ENSMUSG00000046204.14	5300.14	0.10687	0.0543157	1.96757	0.0491178	0.618895	ENSMUSG00000046204.14	ENSMUSG00000046204	Pnma2	14	66911170	66921023	66911170	1	paraneoplastic antigen MA2 [Source:MGI Symbol;Acc:MGI:2444129]
ENSMUSG00000021806.4	1236.12	-0.220896	0.112274	-1.96747	0.0491292	0.618895	ENSMUSG00000021806.4	ENSMUSG00000021806	Nid2	14	19751265	19811787	19751265	1	nidogen 2 [Source:MGI Symbol;Acc:MGI:1298229]
ENSMUSG00000028619.15	1448.55	-0.18482	0.0939481	-1.96725	0.0491543	0.618895	ENSMUSG00000028619.15	ENSMUSG00000028619	Tceanc2	4	107134155	107179116	107178547	-1	transcription elongation factor A (SII) N-terminal and central domain containing 2 [Source:MGI Symbol;Acc:MGI:1913776]
ENSMUSG00000075033.4	3610.58	0.139099	0.0707149	1.96704	0.0491784	0.618895	ENSMUSG00000075033.4	ENSMUSG00000075033	Nxpe3	16	55839953	55895285	55895285	-1	neurexophilin and PC-esterase domain family, member 3 [Source:MGI Symbol;Acc:MGI:2686598]
ENSMUSG00000031010.17	17601.3	0.108272	0.0550511	1.96676	0.0492112	0.618895	ENSMUSG00000031010.17	ENSMUSG00000031010	Usp9x	X	13071498	13173328	13071498	1	ubiquitin specific peptidase 9, X chromosome [Source:MGI Symbol;Acc:MGI:894681]
ENSMUSG00000044749.13	4304.42	0.174577	0.0887668	1.96669	0.0492187	0.618895	ENSMUSG00000044749.13	ENSMUSG00000044749	Abca6	11	110176820	110251776	110251776	-1	ATP-binding cassette, sub-family A (ABC1), member 6 [Source:MGI Symbol;Acc:MGI:1923434]
ENSMUSG00000024758.15	86366	0.0978613	0.04976	1.96667	0.0492216	0.618895	ENSMUSG00000024758.15	ENSMUSG00000024758	Rtn3	19	7425901	7483281	7483202	-1	reticulon 3 [Source:MGI Symbol;Acc:MGI:1339970]
ENSMUSG00000034205.16	411.304	-0.258607	0.131523	-1.96625	0.0492697	0.618895	ENSMUSG00000034205.16	ENSMUSG00000034205	Loxl2	14	69609068	69695834	69609068	1	lysyl oxidase-like 2 [Source:MGI Symbol;Acc:MGI:2137913]
ENSMUSG00000071847.13	586.869	-0.264387	0.134463	-1.96625	0.04927	0.618895	ENSMUSG00000071847.13	ENSMUSG00000071847	Apcdd1	18	62922231	62961179	62922231	1	adenomatosis polyposis coli down-regulated 1 [Source:MGI Symbol;Acc:MGI:3513977]
ENSMUSG00000045613.9	1148.29	0.181729	0.0924339	1.96604	0.049294	0.618895	ENSMUSG00000045613.9	ENSMUSG00000045613	Chrm2	6	36388084	36528414	36388084	1	cholinergic receptor, muscarinic 2, cardiac [Source:MGI Symbol;Acc:MGI:88397]
ENSMUSG00000032330.7	4714.88	-0.11991	0.0609933	-1.96596	0.0493032	0.618895	ENSMUSG00000032330.7	ENSMUSG00000032330	Cox7a2	9	79755361	79759878	79759878	-1	cytochrome c oxidase subunit 7A2 [Source:MGI Symbol;Acc:MGI:1316715]
ENSMUSG00000062960.10	532.778	-0.291402	0.148234	-1.96582	0.0493192	0.618895	ENSMUSG00000062960.10	ENSMUSG00000062960	Kdr	5	75932827	75978458	75978458	-1	kinase insert domain protein receptor [Source:MGI Symbol;Acc:MGI:96683]
ENSMUSG00000021451.16	2967.59	-0.117227	0.0596385	-1.96563	0.0493413	0.618895	ENSMUSG00000021451.16	ENSMUSG00000021451	Sema4d	13	51685529	51793747	51704971	-1	sema domain, immunoglobulin domain (Ig), transmembrane domain (TM) and short cytoplasmic domain, (semaphorin) 4D [Source:MGI Symbol;Acc:MGI:109244]
ENSMUSG00000030697.7	1657.16	0.131729	0.0670299	1.96522	0.0493886	0.619061	ENSMUSG00000030697.7	ENSMUSG00000030697	Ppp4c	7	126785866	126792496	126792496	-1	protein phosphatase 4, catalytic subunit [Source:MGI Symbol;Acc:MGI:1891763]
ENSMUSG00000041420.18	1385.01	0.155571	0.0791742	1.96492	0.049423	0.619064	ENSMUSG00000041420.18	ENSMUSG00000041420	Meis3	7	16175090	16186504	16175090	1	Meis homeobox 3 [Source:MGI Symbol;Acc:MGI:108519]
ENSMUSG00000049305.6	1339.64	0.184712	0.094027	1.96445	0.0494774	0.619319	ENSMUSG00000049305.6	ENSMUSG00000049305	Ccdc71	9	108460527	108465938	108460527	1	coiled-coil domain containing 71 [Source:MGI Symbol;Acc:MGI:1919704]
ENSMUSG00000116295.1	6.23147	-1.96686	1.00132	-1.96427	0.049499	NA	ENSMUSG00000116295.1	ENSMUSG00000116295	Gm32885	15	97157029	97167244	97167242	-1	predicted gene, 32885 [Source:MGI Symbol;Acc:MGI:5592044]
ENSMUSG00000113523.1	1.73995	-4.27299	2.17544	-1.96419	0.0495075	NA	ENSMUSG00000113523.1	ENSMUSG00000113523	Gm48366	12	62372197	62375371	62375371	-1	predicted gene, 48366 [Source:MGI Symbol;Acc:MGI:6097837]
ENSMUSG00000051379.12	803.028	-0.20898	0.106432	-1.9635	0.0495877	0.61986	ENSMUSG00000051379.12	ENSMUSG00000051379	Flrt3	2	140650914	140671469	140671450	-1	fibronectin leucine rich transmembrane protein 3 [Source:MGI Symbol;Acc:MGI:1918686]
ENSMUSG00000041530.17	1707.69	0.157384	0.0801846	1.96278	0.0496722	0.61986	ENSMUSG00000041530.17	ENSMUSG00000041530	Ago1	4	126435012	126468583	126468583	-1	argonaute RISC catalytic subunit 1 [Source:MGI Symbol;Acc:MGI:2446630]
ENSMUSG00000001493.9	81.3237	-0.51292	0.261337	-1.96268	0.0496835	0.61986	ENSMUSG00000001493.9	ENSMUSG00000001493	Meox1	11	101877510	101894374	101894374	-1	mesenchyme homeobox 1 [Source:MGI Symbol;Acc:MGI:103220]
ENSMUSG00000044550.11	2278.16	0.132782	0.0676536	1.96267	0.049684	0.61986	ENSMUSG00000044550.11	ENSMUSG00000044550	Tceal3	X	136590842	136668378	136590855	1	transcription elongation factor A (SII)-like 3 [Source:MGI Symbol;Acc:MGI:1913354]
ENSMUSG00000070551.3	145.39	0.395487	0.201552	1.96221	0.0497381	0.61986	ENSMUSG00000070551.3	ENSMUSG00000070551	Mrgprb5	7	48167983	48169019	48169019	-1	MAS-related GPR, member B5 [Source:MGI Symbol;Acc:MGI:3033121]
ENSMUSG00000059857.15	2545.56	0.139303	0.0709967	1.9621	0.0497509	0.61986	ENSMUSG00000059857.15	ENSMUSG00000059857	Ntng1	3	109780040	110144011	110143004	-1	netrin G1 [Source:MGI Symbol;Acc:MGI:1934028]
ENSMUSG00000040857.15	1742.86	0.147086	0.0749662	1.96203	0.0497593	0.61986	ENSMUSG00000040857.15	ENSMUSG00000040857	Erf	7	25242561	25250761	25250761	-1	Ets2 repressor factor [Source:MGI Symbol;Acc:MGI:109637]
ENSMUSG00000038583.13	160.524	0.503889	0.256922	1.96126	0.0498492	0.620444	ENSMUSG00000038583.13	ENSMUSG00000038583	Pln	10	53337667	53345987	53337667	1	phospholamban [Source:MGI Symbol;Acc:MGI:97622]
ENSMUSG00000026167.14	30.9404	0.882321	0.449928	1.96103	0.0498757	0.620444	ENSMUSG00000026167.14	ENSMUSG00000026167	Wnt10a	1	74791516	74804179	74791516	1	wingless-type MMTV integration site family, member 10A [Source:MGI Symbol;Acc:MGI:108071]
ENSMUSG00000026765.12	380.769	0.293858	0.14987	1.96075	0.0499086	0.620444	ENSMUSG00000026765.12	ENSMUSG00000026765	Lypd6b	2	49787688	49948849	49787688	1	LY6/PLAUR domain containing 6B [Source:MGI Symbol;Acc:MGI:1919147]
ENSMUSG00000032328.12	30685.1	0.0948357	0.0483839	1.96007	0.049988	0.620601	ENSMUSG00000032328.12	ENSMUSG00000032328	Tmem30a	9	79768943	79793507	79793430	-1	transmembrane protein 30A [Source:MGI Symbol;Acc:MGI:106402]
ENSMUSG00000097386.1	8.78265	1.77103	0.903712	1.95973	0.0500272	0.620601	ENSMUSG00000097386.1	ENSMUSG00000097386	9130213A22Rik	11	69120054	69122589	69122589	-1	RIKEN cDNA 9130213A22 gene [Source:MGI Symbol;Acc:MGI:3642718]
ENSMUSG00000027230.9	908.068	-0.184993	0.0944017	-1.95964	0.0500384	0.620601	ENSMUSG00000027230.9	ENSMUSG00000027230	Creb3l1	2	91982328	92024502	92024502	-1	cAMP responsive element binding protein 3-like 1 [Source:MGI Symbol;Acc:MGI:1347062]
ENSMUSG00000066175.2	16.5511	1.64471	0.839366	1.95947	0.0500578	0.620601	ENSMUSG00000066175.2	ENSMUSG00000066175	2510046G10Rik	7	126648543	126649594	126649594	-1	RIKEN cDNA 2510046G10 gene [Source:MGI Symbol;Acc:MGI:3698051]
ENSMUSG00000041134.15	511.289	-0.32683	0.166823	-1.95914	0.0500959	0.62065	ENSMUSG00000041134.15	ENSMUSG00000041134	Cyyr1	16	85421533	85553397	85550417	-1	cysteine and tyrosine-rich protein 1 [Source:MGI Symbol;Acc:MGI:2152187]
ENSMUSG00000067288.13	2199.02	-0.157246	0.0802927	-1.95841	0.0501821	0.62096	ENSMUSG00000067288.13	ENSMUSG00000067288	Rps28	17	33819027	33824562	33824492	-1	ribosomal protein S28 [Source:MGI Symbol;Acc:MGI:1859516]
ENSMUSG00000090066.2	80.6037	-2.21494	1.13127	-1.95792	0.050239	0.62096	ENSMUSG00000090066.2	ENSMUSG00000090066	1110002E22Rik	3	138065052	138081506	138065052	1	RIKEN cDNA 1110002E22 gene [Source:MGI Symbol;Acc:MGI:1915066]
ENSMUSG00000035686.8	946.11	0.268701	0.137254	1.95768	0.0502671	0.62096	ENSMUSG00000035686.8	ENSMUSG00000035686	Thrsp	7	97412938	97417730	97417730	-1	thyroid hormone responsive [Source:MGI Symbol;Acc:MGI:109126]
ENSMUSG00000026854.16	14769	0.0975725	0.0498437	1.95757	0.0502806	0.62096	ENSMUSG00000026854.16	ENSMUSG00000026854	Usp20	2	30982279	31023586	30982279	1	ubiquitin specific peptidase 20 [Source:MGI Symbol;Acc:MGI:1921520]
ENSMUSG00000022367.7	43.9621	-0.782109	0.39955	-1.95747	0.0502917	0.62096	ENSMUSG00000022367.7	ENSMUSG00000022367	Has2	15	56665627	56694539	56694539	-1	hyaluronan synthase 2 [Source:MGI Symbol;Acc:MGI:107821]
ENSMUSG00000028248.15	2359	-0.152033	0.0776965	-1.95675	0.0503765	0.621078	ENSMUSG00000028248.15	ENSMUSG00000028248	Pnisr	4	21847583	21876475	21847583	1	PNN interacting serine/arginine-rich [Source:MGI Symbol;Acc:MGI:1913875]
ENSMUSG00000030337.16	34453.8	0.105722	0.0540398	1.95637	0.0504221	0.621078	ENSMUSG00000030337.16	ENSMUSG00000030337	Vamp1	6	125215551	125245964	125215551	1	vesicle-associated membrane protein 1 [Source:MGI Symbol;Acc:MGI:1313276]
ENSMUSG00000037747.9	5446.88	0.118386	0.0605268	1.95593	0.0504739	0.621078	ENSMUSG00000037747.9	ENSMUSG00000037747	Phyhipl	10	70557682	70655965	70599291	-1	phytanoyl-CoA hydroxylase interacting protein-like [Source:MGI Symbol;Acc:MGI:1918161]
ENSMUSG00000024376.7	539.574	0.212477	0.108637	1.95584	0.050484	0.621078	ENSMUSG00000024376.7	ENSMUSG00000024376	Epb41l4a	18	33796327	34006966	34006919	-1	erythrocyte membrane protein band 4.1 like 4a [Source:MGI Symbol;Acc:MGI:103007]
ENSMUSG00000051498.7	19.2945	-1.13504	0.580363	-1.95575	0.050495	0.621078	ENSMUSG00000051498.7	ENSMUSG00000051498	Tlr6	5	64952031	64960097	64960047	-1	toll-like receptor 6 [Source:MGI Symbol;Acc:MGI:1341296]
ENSMUSG00000030849.18	183.112	-0.550956	0.281725	-1.95565	0.0505064	0.621078	ENSMUSG00000030849.18	ENSMUSG00000030849	Fgfr2	7	130162451	133123350	130266263	-1	fibroblast growth factor receptor 2 [Source:MGI Symbol;Acc:MGI:95523]
ENSMUSG00000034120.18	4565.59	-0.0948253	0.0485131	-1.95463	0.0506265	0.622134	ENSMUSG00000034120.18	ENSMUSG00000034120	Srsf2	11	116849901	116853094	116853094	-1	serine and arginine-rich splicing factor 2 [Source:MGI Symbol;Acc:MGI:98284]
ENSMUSG00000022941.8	13.4028	-1.32189	0.676583	-1.95378	0.0507276	0.622955	ENSMUSG00000022941.8	ENSMUSG00000022941	Ripply3	16	94328420	94336935	94328420	1	ripply transcriptional repressor 3 [Source:MGI Symbol;Acc:MGI:2181192]
ENSMUSG00000056895.4	364.563	0.245979	0.125942	1.95311	0.050806	0.623497	ENSMUSG00000056895.4	ENSMUSG00000056895	H2bu2	11	58948920	58949533	58948920	1	H2B.U histone 2 [Source:MGI Symbol;Acc:MGI:1925553]
ENSMUSG00000020628.16	3594.67	0.122615	0.0627887	1.95281	0.0508417	0.623514	ENSMUSG00000020628.16	ENSMUSG00000020628	Trappc12	12	28690628	28750472	28750472	-1	trafficking protein particle complex 12 [Source:MGI Symbol;Acc:MGI:2445089]
ENSMUSG00000052295.4	7.19969	1.73233	0.887268	1.95243	0.0508867	0.623521	ENSMUSG00000052295.4	ENSMUSG00000052295	8030423F21Rik	5	52607550	52619012	52619012	-1	RIKEN cDNA 8030423F21 gene [Source:MGI Symbol;Acc:MGI:2443206]
ENSMUSG00000021640.6	191.133	-0.366265	0.187614	-1.95223	0.0509109	0.623521	ENSMUSG00000021640.6	ENSMUSG00000021640	Naip1	13	100407764	100452869	100446511	-1	NLR family, apoptosis inhibitory protein 1 [Source:MGI Symbol;Acc:MGI:1298223]
ENSMUSG00000028633.7	2375.03	0.118302	0.060616	1.95166	0.0509787	0.623932	ENSMUSG00000028633.7	ENSMUSG00000028633	Ctps	4	120539868	120570276	120570276	-1	cytidine 5'-triphosphate synthase [Source:MGI Symbol;Acc:MGI:1858304]
ENSMUSG00000036198.12	2158.02	0.177683	0.0910752	1.95094	0.0510637	0.624293	ENSMUSG00000036198.12	ENSMUSG00000036198	Arhgap36	X	49463945	49500244	49470450	1	Rho GTPase activating protein 36 [Source:MGI Symbol;Acc:MGI:1922654]
ENSMUSG00000085238.1	5.67048	-2.20455	1.13004	-1.95085	0.0510745	NA	ENSMUSG00000085238.1	ENSMUSG00000085238	4930479D17Rik	6	146657218	146665403	146657218	1	RIKEN cDNA 4930479D17 gene [Source:MGI Symbol;Acc:MGI:1922175]
ENSMUSG00000023048.13	7050.73	-0.104395	0.0535264	-1.95034	0.0511356	0.624293	ENSMUSG00000023048.13	ENSMUSG00000023048	Prr13	15	102459028	102462806	102459028	1	proline rich 13 [Source:MGI Symbol;Acc:MGI:1913401]
ENSMUSG00000002908.17	2284.73	-0.150019	0.0769265	-1.95015	0.0511578	0.624293	ENSMUSG00000002908.17	ENSMUSG00000002908	Kcnn1	8	70842049	70863258	70857013	-1	potassium intermediate/small conductance calcium-activated channel, subfamily N, member 1 [Source:MGI Symbol;Acc:MGI:1933993]
ENSMUSG00000018398.18	9247.7	0.0797651	0.0409174	1.94942	0.0512456	0.624293	ENSMUSG00000018398.18	ENSMUSG00000018398	Septin8	11	53519257	53549565	53519257	1	septin 8 [Source:MGI Symbol;Acc:MGI:894310]
ENSMUSG00000033732.10	2533.44	0.113941	0.0584517	1.94931	0.0512581	0.624293	ENSMUSG00000033732.10	ENSMUSG00000033732	Sf3b3	8	110810239	110846787	110846776	-1	splicing factor 3b, subunit 3 [Source:MGI Symbol;Acc:MGI:1289341]
ENSMUSG00000030275.6	26899.5	0.0785248	0.0402885	1.94906	0.0512882	0.624293	ENSMUSG00000030275.6	ENSMUSG00000030275	Etnk1	6	143167221	143232307	143167221	1	ethanolamine kinase 1 [Source:MGI Symbol;Acc:MGI:1922570]
ENSMUSG00000028064.17	350.644	-0.289245	0.14841	-1.94896	0.0513007	0.624293	ENSMUSG00000028064.17	ENSMUSG00000028064	Sema4a	3	88435959	88461182	88455739	-1	sema domain, immunoglobulin domain (Ig), transmembrane domain (TM) and short cytoplasmic domain, (semaphorin) 4A [Source:MGI Symbol;Acc:MGI:107560]
ENSMUSG00000026628.13	477.838	-0.876996	0.450055	-1.94864	0.0513379	0.624293	ENSMUSG00000026628.13	ENSMUSG00000026628	Atf3	1	191170296	191218039	191183340	-1	activating transcription factor 3 [Source:MGI Symbol;Acc:MGI:109384]
ENSMUSG00000055421.8	4854.58	0.102808	0.0527698	1.94823	0.0513871	0.624293	ENSMUSG00000055421.8	ENSMUSG00000055421	Pcdh9	14	93013410	93890679	93890669	-1	protocadherin 9 [Source:MGI Symbol;Acc:MGI:1306801]
ENSMUSG00000057137.9	320.777	-0.291542	0.149647	-1.9482	0.0513915	0.624293	ENSMUSG00000057137.9	ENSMUSG00000057137	Tmem140	6	34863146	34874946	34863146	1	transmembrane protein 140 [Source:MGI Symbol;Acc:MGI:1915737]
ENSMUSG00000036845.12	697.848	-0.187022	0.0959974	-1.9482	0.0513916	0.624293	ENSMUSG00000036845.12	ENSMUSG00000036845	Lin37	7	30555441	30559838	30559646	-1	lin-37 homolog (C. elegans) [Source:MGI Symbol;Acc:MGI:1922910]
ENSMUSG00000033777.4	36.1687	-0.807453	0.414556	-1.94776	0.0514441	0.624293	ENSMUSG00000033777.4	ENSMUSG00000033777	Tlr13	X	106143204	106160493	106143204	1	toll-like receptor 13 [Source:MGI Symbol;Acc:MGI:3045213]
ENSMUSG00000027273.13	70295.9	0.116872	0.0600103	1.94754	0.05147	0.624293	ENSMUSG00000027273.13	ENSMUSG00000027273	Snap25	2	136713453	136782428	136713453	1	synaptosomal-associated protein 25 [Source:MGI Symbol;Acc:MGI:98331]
ENSMUSG00000034430.16	1001.96	0.263097	0.13511	1.94728	0.0515012	0.624293	ENSMUSG00000034430.16	ENSMUSG00000034430	Zxdc	6	90369492	90403490	90369492	1	ZXD family zinc finger C [Source:MGI Symbol;Acc:MGI:1933108]
ENSMUSG00000024109.18	9390.48	0.109668	0.0563239	1.94709	0.0515235	0.624293	ENSMUSG00000024109.18	ENSMUSG00000024109	Nrxn1	17	90033631	91093071	91088907	-1	neurexin I [Source:MGI Symbol;Acc:MGI:1096391]
ENSMUSG00000010064.15	59.1916	-0.962473	0.494588	-1.94601	0.0516535	0.625451	ENSMUSG00000010064.15	ENSMUSG00000010064	Slc38a3	9	107650634	107669530	107659528	-1	solute carrier family 38, member 3 [Source:MGI Symbol;Acc:MGI:1923507]
ENSMUSG00000025608.9	1258.4	-0.189129	0.09722	-1.94537	0.0517308	0.625678	ENSMUSG00000025608.9	ENSMUSG00000025608	Podxl	6	31519488	31563981	31563981	-1	podocalyxin-like [Source:MGI Symbol;Acc:MGI:1351317]
ENSMUSG00000043822.18	847.649	-0.210584	0.108254	-1.94528	0.0517411	0.625678	ENSMUSG00000043822.18	ENSMUSG00000043822	Adamtsl5	10	80339110	80348412	80340085	-1	ADAMTS-like 5 [Source:MGI Symbol;Acc:MGI:1913798]
ENSMUSG00000017057.9	424.068	-0.224216	0.115294	-1.94473	0.0518075	0.625715	ENSMUSG00000017057.9	ENSMUSG00000017057	Il13ra1	X	36112110	36171259	36112110	1	interleukin 13 receptor, alpha 1 [Source:MGI Symbol;Acc:MGI:105052]
ENSMUSG00000025578.9	390.993	0.278208	0.143061	1.94468	0.051813	0.625715	ENSMUSG00000025578.9	ENSMUSG00000025578	Cbx8	11	119036305	119040969	119040969	-1	chromobox 8 [Source:MGI Symbol;Acc:MGI:1353589]
ENSMUSG00000020932.14	46.8462	-0.832704	0.428408	-1.94372	0.0519296	0.626404	ENSMUSG00000020932.14	ENSMUSG00000020932	Gfap	11	102887336	102900912	102897131	-1	glial fibrillary acidic protein [Source:MGI Symbol;Acc:MGI:95697]
ENSMUSG00000073514.4	1628.82	0.156848	0.0807048	1.94347	0.0519591	0.626404	ENSMUSG00000073514.4	ENSMUSG00000073514	Dok6	18	89292424	89769528	89769528	-1	docking protein 6 [Source:MGI Symbol;Acc:MGI:3639495]
ENSMUSG00000086877.7	120.854	-0.46211	0.23779	-1.94335	0.0519734	0.626404	ENSMUSG00000086877.7	ENSMUSG00000086877	A230072C01Rik	X	20961684	20986737	20961684	1	RIKEN cDNA A230072C01 gene [Source:MGI Symbol;Acc:MGI:2444644]
ENSMUSG00000049502.17	766.758	-0.181196	0.0932894	-1.9423	0.0521008	0.627523	ENSMUSG00000049502.17	ENSMUSG00000049502	Dtx3l	16	35926511	35939151	35939151	-1	deltex 3-like, E3 ubiquitin ligase [Source:MGI Symbol;Acc:MGI:2656973]
ENSMUSG00000002233.13	2159.82	-0.133111	0.0685454	-1.94194	0.0521439	0.627626	ENSMUSG00000002233.13	ENSMUSG00000002233	Rhoc	3	104788375	104794459	104788375	1	ras homolog family member C [Source:MGI Symbol;Acc:MGI:106028]
ENSMUSG00000075334.2	3280.74	0.139708	0.071963	1.94139	0.0522109	0.628017	ENSMUSG00000075334.2	ENSMUSG00000075334	Rprm	2	54084093	54085552	54085552	-1	reprimo, TP53 dependent G2 arrest mediator candidate [Source:MGI Symbol;Acc:MGI:1915124]
ENSMUSG00000103276.1	368.111	0.280468	0.144593	1.9397	0.0524157	0.630063	ENSMUSG00000103276.1	ENSMUSG00000103276	Gm37917	9	98767930	98768321	98767930	1	predicted gene, 37917 [Source:MGI Symbol;Acc:MGI:5611145]
ENSMUSG00000017404.12	9360.09	-0.0817279	0.042146	-1.93916	0.0524817	0.630302	ENSMUSG00000017404.12	ENSMUSG00000017404	Rpl19	11	98026710	98030492	98026710	1	ribosomal protein L19 [Source:MGI Symbol;Acc:MGI:98020]
ENSMUSG00000040006.13	630.758	-0.208626	0.107599	-1.93892	0.0525106	0.630302	ENSMUSG00000040006.13	ENSMUSG00000040006	Ginm1	10	7767947	7792824	7780917	-1	glycoprotein integral membrane 1 [Source:MGI Symbol;Acc:MGI:2384905]
ENSMUSG00000038141.11	2455.96	0.127893	0.0659735	1.93855	0.0525559	0.630302	ENSMUSG00000038141.11	ENSMUSG00000038141	Tmem181a	17	6256860	6308314	6256860	1	transmembrane protein 181A [Source:MGI Symbol;Acc:MGI:1924356]
ENSMUSG00000024388.11	12.7396	1.92012	0.99057	1.9384	0.0525743	0.630302	ENSMUSG00000024388.11	ENSMUSG00000024388	Myo7b	18	31959234	32036961	32036961	-1	myosin VIIB [Source:MGI Symbol;Acc:MGI:107709]
ENSMUSG00000088608.1	1.79779	-4.33039	2.23418	-1.93824	0.0525935	NA	ENSMUSG00000088608.1	ENSMUSG00000088608	Gm24186	10	94821529	94821655	94821655	-1	predicted gene, 24186 [Source:MGI Symbol;Acc:MGI:5453963]
ENSMUSG00000113769.1	16.1085	-1.20732	0.623185	-1.93733	0.0527048	0.63128	ENSMUSG00000113769.1	ENSMUSG00000113769	5033406O09Rik	12	111941991	111944484	111944484	-1	RIKEN cDNA 5033406O09 gene [Source:MGI Symbol;Acc:MGI:1923205]
ENSMUSG00000052459.13	24245.5	0.107744	0.0556192	1.93716	0.0527254	0.63128	ENSMUSG00000052459.13	ENSMUSG00000052459	Atp6v1a	16	44085402	44139705	44139305	-1	ATPase, H+ transporting, lysosomal V1 subunit A [Source:MGI Symbol;Acc:MGI:1201780]
ENSMUSG00000028405.9	1621.9	0.143356	0.0740598	1.93568	0.0529067	0.633035	ENSMUSG00000028405.9	ENSMUSG00000028405	Aco1	4	40143081	40198338	40143081	1	aconitase 1 [Source:MGI Symbol;Acc:MGI:87879]
ENSMUSG00000027419.9	13077.1	0.09133	0.0472071	1.93467	0.0530311	0.633338	ENSMUSG00000027419.9	ENSMUSG00000027419	Pcsk2	2	143546156	143816285	143546271	1	proprotein convertase subtilisin/kexin type 2 [Source:MGI Symbol;Acc:MGI:97512]
ENSMUSG00000023914.16	12.2299	1.41241	0.730068	1.93463	0.0530355	0.633338	ENSMUSG00000023914.16	ENSMUSG00000023914	Mep1a	17	43474324	43502812	43502812	-1	meprin 1 alpha [Source:MGI Symbol;Acc:MGI:96963]
ENSMUSG00000054459.8	7134.23	0.134031	0.0692811	1.9346	0.0530391	0.633338	ENSMUSG00000054459.8	ENSMUSG00000054459	Vsnl1	12	11325242	11436613	11435640	-1	visinin-like 1 [Source:MGI Symbol;Acc:MGI:1349453]
ENSMUSG00000110928.1	2.30757	-3.61247	1.86746	-1.93443	0.0530607	NA	ENSMUSG00000110928.1	ENSMUSG00000110928	Gm48114	9	40363217	40366902	40366902	-1	predicted gene, 48114 [Source:MGI Symbol;Acc:MGI:6097467]
ENSMUSG00000023932.9	3467.08	0.096783	0.0500488	1.93377	0.0531411	0.633338	ENSMUSG00000023932.9	ENSMUSG00000023932	Cdc5l	17	45391884	45433737	45433737	-1	cell division cycle 5-like (S. pombe) [Source:MGI Symbol;Acc:MGI:1918952]
ENSMUSG00000070733.13	8379.28	0.0866416	0.0448082	1.93361	0.053161	0.633338	ENSMUSG00000070733.13	ENSMUSG00000070733	Fryl	5	73019987	73256619	73071175	-1	FRY like transcription coactivator [Source:MGI Symbol;Acc:MGI:1919563]
ENSMUSG00000026604.17	1205.02	-0.191343	0.0989684	-1.93337	0.0531902	0.633338	ENSMUSG00000026604.17	ENSMUSG00000026604	Ptpn14	1	189728268	189876695	189728268	1	protein tyrosine phosphatase, non-receptor type 14 [Source:MGI Symbol;Acc:MGI:102467]
ENSMUSG00000041229.15	1284.3	0.18539	0.09589	1.93336	0.0531921	0.633338	ENSMUSG00000041229.15	ENSMUSG00000041229	Phf8	X	151520672	151633859	151520672	1	PHD finger protein 8 [Source:MGI Symbol;Acc:MGI:2444341]
ENSMUSG00000107002.1	876.225	-0.167754	0.0867919	-1.93283	0.0532568	0.633338	ENSMUSG00000107002.1	ENSMUSG00000107002	0610012G03Rik	16	31947050	31948494	31948494	-1	RIKEN cDNA 0610012G03 gene [Source:MGI Symbol;Acc:MGI:1913301]
ENSMUSG00000031537.15	1751.5	-0.137212	0.0709921	-1.93278	0.0532634	0.633338	ENSMUSG00000031537.15	ENSMUSG00000031537	Ikbkb	8	22659212	22706589	22706578	-1	inhibitor of kappaB kinase beta [Source:MGI Symbol;Acc:MGI:1338071]
ENSMUSG00000029370.10	150.893	0.399114	0.206514	1.93263	0.053282	0.633338	ENSMUSG00000029370.10	ENSMUSG00000029370	Rassf6	5	90603076	90640657	90640487	-1	Ras association (RalGDS/AF-6) domain family member 6 [Source:MGI Symbol;Acc:MGI:1920496]
ENSMUSG00000043019.12	2840.8	0.116535	0.0603112	1.93223	0.0533317	0.633338	ENSMUSG00000043019.12	ENSMUSG00000043019	Edem3	1	151755371	151822051	151755371	1	ER degradation enhancer, mannosidase alpha-like 3 [Source:MGI Symbol;Acc:MGI:1914217]
ENSMUSG00000038132.6	42.9087	-2.18036	1.12851	-1.93208	0.0533502	0.633338	ENSMUSG00000038132.6	ENSMUSG00000038132	Rbm24	13	46418434	46431095	46418434	1	RNA binding motif protein 24 [Source:MGI Symbol;Acc:MGI:3610364]
ENSMUSG00000063063.12	14821.9	0.086307	0.0446772	1.93179	0.0533853	0.63334	ENSMUSG00000063063.12	ENSMUSG00000063063	Ctnna2	6	76881637	77979699	77979699	-1	catenin (cadherin associated protein), alpha 2 [Source:MGI Symbol;Acc:MGI:88275]
ENSMUSG00000028134.11	4056.61	0.104616	0.0541657	1.93141	0.053432	0.633482	ENSMUSG00000028134.11	ENSMUSG00000028134	Ptbp2	3	119718742	119784466	119783804	-1	polypyrimidine tract binding protein 2 [Source:MGI Symbol;Acc:MGI:1860489]
ENSMUSG00000105373.1	17.6498	7.54898	3.90922	1.93107	0.0534744	0.633571	ENSMUSG00000105373.1	ENSMUSG00000105373	Gm42429	5	44134393	44134950	44134393	1	predicted gene 42429 [Source:MGI Symbol;Acc:MGI:5662566]
ENSMUSG00000038576.15	5181.52	0.110232	0.0571404	1.92914	0.0537135	0.635988	ENSMUSG00000038576.15	ENSMUSG00000038576	Susd4	1	182763860	182896591	182763860	1	sushi domain containing 4 [Source:MGI Symbol;Acc:MGI:2138351]
ENSMUSG00000082265.1	1.77895	-4.31671	2.23857	-1.92833	0.0538141	NA	ENSMUSG00000082265.1	ENSMUSG00000082265	Gm15547	5	121530563	121530895	121530895	-1	predicted gene 15547 [Source:MGI Symbol;Acc:MGI:3782996]
ENSMUSG00000009418.16	10398.7	0.0898966	0.046636	1.92762	0.0539021	0.637179	ENSMUSG00000009418.16	ENSMUSG00000009418	Nav1	1	135434580	135688105	135585705	-1	neuron navigator 1 [Source:MGI Symbol;Acc:MGI:2183683]
ENSMUSG00000012296.16	576.746	-0.21017	0.109031	-1.92762	0.0539028	0.637179	ENSMUSG00000012296.16	ENSMUSG00000012296	Tjap1	17	46257851	46283026	46283010	-1	tight junction associated protein 1 [Source:MGI Symbol;Acc:MGI:1921344]
ENSMUSG00000027022.14	656.647	-2.44912	1.2707	-1.92738	0.0539319	0.637179	ENSMUSG00000027022.14	ENSMUSG00000027022	Xirp2	2	67173834	67526615	67173834	1	xin actin-binding repeat containing 2 [Source:MGI Symbol;Acc:MGI:2685198]
ENSMUSG00000050505.7	15.6657	-1.16149	0.602769	-1.92692	0.0539895	0.637179	ENSMUSG00000050505.7	ENSMUSG00000050505	Pcdh20	14	88464743	88471396	88471396	-1	protocadherin 20 [Source:MGI Symbol;Acc:MGI:2443376]
ENSMUSG00000040164.3	4501.94	0.133007	0.0690278	1.92686	0.0539976	0.637179	ENSMUSG00000040164.3	ENSMUSG00000040164	Kcns1	2	164163619	164171113	164171113	-1	K+ voltage-gated channel, subfamily S, 1 [Source:MGI Symbol;Acc:MGI:1197019]
ENSMUSG00000043252.8	2690.24	-0.123062	0.0638736	-1.92664	0.0540243	0.637179	ENSMUSG00000043252.8	ENSMUSG00000043252	Tmem64	4	15265831	15286753	15265831	1	transmembrane protein 64 [Source:MGI Symbol;Acc:MGI:2140359]
ENSMUSG00000030352.15	728.613	-0.179626	0.0932487	-1.92631	0.0540652	0.637247	ENSMUSG00000030352.15	ENSMUSG00000030352	Tspan9	6	127961396	128143594	128143563	-1	tetraspanin 9 [Source:MGI Symbol;Acc:MGI:1924558]
ENSMUSG00000071342.5	15.7731	-1.29591	0.672951	-1.92572	0.0541399	0.6374	ENSMUSG00000071342.5	ENSMUSG00000071342	Lsmem1	12	40175493	40199490	40199490	-1	leucine-rich single-pass membrane protein 1 [Source:MGI Symbol;Acc:MGI:2685735]
ENSMUSG00000052026.8	201.6	0.392129	0.203645	1.92556	0.0541597	0.6374	ENSMUSG00000052026.8	ENSMUSG00000052026	Slc6a7	18	60995380	61014222	61014222	-1	solute carrier family 6 (neurotransmitter transporter, L-proline), member 7 [Source:MGI Symbol;Acc:MGI:2147363]
ENSMUSG00000027665.13	4227.2	0.0960105	0.0498753	1.92501	0.0542282	0.6374	ENSMUSG00000027665.13	ENSMUSG00000027665	Pik3ca	3	32397671	32468486	32397671	1	phosphatidylinositol-4,5-bisphosphate 3-kinase catalytic subunit alpha [Source:MGI Symbol;Acc:MGI:1206581]
ENSMUSG00000024901.15	3333.58	0.136087	0.0707145	1.92446	0.0542974	0.6374	ENSMUSG00000024901.15	ENSMUSG00000024901	Peli3	19	4929717	4943127	4943127	-1	pellino 3 [Source:MGI Symbol;Acc:MGI:1924963]
ENSMUSG00000039539.13	176.619	0.344132	0.178846	1.92417	0.0543328	0.6374	ENSMUSG00000039539.13	ENSMUSG00000039539	Sgcz	8	37522298	38661508	38661508	-1	sarcoglycan zeta [Source:MGI Symbol;Acc:MGI:2388820]
ENSMUSG00000079588.3	65.4285	-1.95872	1.01797	-1.92414	0.0543367	0.6374	ENSMUSG00000079588.3	ENSMUSG00000079588	Tmem182	1	40805601	40856887	40805601	1	transmembrane protein 182 [Source:MGI Symbol;Acc:MGI:1923725]
ENSMUSG00000022108.8	32327.1	0.0696549	0.0362035	1.92399	0.0543564	0.6374	ENSMUSG00000022108.8	ENSMUSG00000022108	Itm2b	14	73362226	73385289	73385289	-1	integral membrane protein 2B [Source:MGI Symbol;Acc:MGI:1309517]
ENSMUSG00000079197.10	1514.66	-0.145744	0.0757727	-1.92344	0.0544254	0.6374	ENSMUSG00000079197.10	ENSMUSG00000079197	Psme2	14	55587441	55591113	55591087	-1	proteasome (prosome, macropain) activator subunit 2 (PA28 beta) [Source:MGI Symbol;Acc:MGI:1096365]
ENSMUSG00000064358.1	46458.8	-0.546975	0.284406	-1.92322	0.0544521	0.6374	ENSMUSG00000064358.1	ENSMUSG00000064358	mt-Co3	MT	8607	9390	8607	1	mitochondrially encoded cytochrome c oxidase III [Source:MGI Symbol;Acc:MGI:102502]
ENSMUSG00000115248.1	2.71695	4.84181	2.51795	1.92292	0.0544906	NA	ENSMUSG00000115248.1	ENSMUSG00000115248	Gm49037	14	33428642	33429025	33429025	-1	predicted gene, 49037 [Source:MGI Symbol;Acc:MGI:6118410]
ENSMUSG00000105081.1	2.71695	4.84181	2.51795	1.92292	0.0544906	NA	ENSMUSG00000105081.1	ENSMUSG00000105081	Gm43110	5	22472767	22472992	22472992	-1	predicted gene 43110 [Source:MGI Symbol;Acc:MGI:5663247]
ENSMUSG00000031935.9	1279.17	0.2303	0.119767	1.92289	0.0544932	0.6374	ENSMUSG00000031935.9	ENSMUSG00000031935	Med17	9	15260351	15279931	15279931	-1	mediator complex subunit 17 [Source:MGI Symbol;Acc:MGI:2182585]
ENSMUSG00000020627.10	2722.95	-0.112631	0.0585791	-1.92271	0.0545162	0.6374	ENSMUSG00000020627.10	ENSMUSG00000020627	Klhl29	12	5077472	5375682	5375682	-1	kelch-like 29 [Source:MGI Symbol;Acc:MGI:2683857]
ENSMUSG00000038155.11	50.0607	-0.931123	0.484299	-1.92262	0.0545277	0.6374	ENSMUSG00000038155.11	ENSMUSG00000038155	Gstp2	19	4040285	4046023	4042263	-1	glutathione S-transferase, pi 2 [Source:MGI Symbol;Acc:MGI:95864]
ENSMUSG00000036934.9	406.345	0.252419	0.131306	1.92236	0.0545601	0.6374	ENSMUSG00000036934.9	ENSMUSG00000036934	4921524J17Rik	8	85408759	85432833	85432833	-1	RIKEN cDNA 4921524J17 gene [Source:MGI Symbol;Acc:MGI:1913964]
ENSMUSG00000106067.1	7.90466	-1.76131	0.916381	-1.92202	0.0546027	0.6374	ENSMUSG00000106067.1	ENSMUSG00000106067	Gm7902	5	133841573	133842519	133842519	-1	predicted gene 7902 [Source:MGI Symbol;Acc:MGI:3645041]
ENSMUSG00000036986.16	606.759	-0.24208	0.125951	-1.92201	0.0546043	0.6374	ENSMUSG00000036986.16	ENSMUSG00000036986	Pml	9	58218076	58249786	58249786	-1	promyelocytic leukemia [Source:MGI Symbol;Acc:MGI:104662]
ENSMUSG00000026848.14	1323.27	0.145421	0.0756945	1.92116	0.0547122	0.637966	ENSMUSG00000026848.14	ENSMUSG00000026848	Tor1b	2	30952959	30959015	30952959	1	torsin family 1, member B [Source:MGI Symbol;Acc:MGI:1353605]
ENSMUSG00000031557.16	1807.01	0.130783	0.0680782	1.92107	0.0547229	0.637966	ENSMUSG00000031557.16	ENSMUSG00000031557	Plekha2	8	25039144	25102376	25102376	-1	pleckstrin homology domain-containing, family A (phosphoinositide binding specific) member 2 [Source:MGI Symbol;Acc:MGI:1928144]
ENSMUSG00000083679.1	4.76674	2.22354	1.1578	1.92049	0.0547963	NA	ENSMUSG00000083679.1	ENSMUSG00000083679	Gm12892	4	122008193	122009338	122008193	1	predicted gene 12892 [Source:MGI Symbol;Acc:MGI:3649649]
ENSMUSG00000116275.1	2208.73	0.231904	0.120779	1.92007	0.0548489	0.638652	ENSMUSG00000116275.1	ENSMUSG00000116275	Zc3h11a	1	133619871	133661380	133661380	-1	zinc finger CCCH type containing 11A [Source:MGI Symbol;Acc:MGI:1917829]
ENSMUSG00000000532.11	3483.84	0.109451	0.0570044	1.92005	0.0548521	0.638652	ENSMUSG00000000532.11	ENSMUSG00000000532	Acvr1b	15	101174067	101213684	101174067	1	activin A receptor, type 1B [Source:MGI Symbol;Acc:MGI:1338944]
ENSMUSG00000056215.13	810.949	0.229284	0.11944	1.91967	0.0548998	0.638799	ENSMUSG00000056215.13	ENSMUSG00000056215	Lrguk	6	34029448	34134034	34029448	1	leucine-rich repeats and guanylate kinase domain containing [Source:MGI Symbol;Acc:MGI:1921604]
ENSMUSG00000113917.1	2.3043	3.55205	1.85041	1.9196	0.0549082	NA	ENSMUSG00000113917.1	ENSMUSG00000113917	Gm48382	12	100366078	100369752	100369752	-1	predicted gene, 48382 [Source:MGI Symbol;Acc:MGI:6097861]
ENSMUSG00000031485.15	1962.41	-0.163866	0.0854053	-1.91869	0.0550237	0.639831	ENSMUSG00000031485.15	ENSMUSG00000031485	Plpbp	8	27042555	27056132	27042555	1	pyridoxal phosphate binding protein [Source:MGI Symbol;Acc:MGI:1891207]
ENSMUSG00000069014.4	3028.36	0.112294	0.058548	1.91798	0.0551135	0.640465	ENSMUSG00000069014.4	ENSMUSG00000069014	Gm5641	3	54481438	54482925	54481438	1	predicted gene 5641 [Source:MGI Symbol;Acc:MGI:3645731]
ENSMUSG00000118099.1	21.5969	-0.986212	0.514328	-1.91748	0.0551774	0.640798	ENSMUSG00000118099.1	ENSMUSG00000118099	Gm31356	19	55099502	55117815	55099502	1	predicted gene, 31356 [Source:MGI Symbol;Acc:MGI:5590515]
ENSMUSG00000083020.1	1.61861	4.10292	2.13997	1.91728	0.0552023	NA	ENSMUSG00000083020.1	ENSMUSG00000083020	Gm15331	17	34501107	34501491	34501491	-1	predicted gene 15331 [Source:MGI Symbol;Acc:MGI:3705549]
ENSMUSG00000039047.17	6585.72	0.10196	0.0531934	1.91677	0.055267	0.641429	ENSMUSG00000039047.17	ENSMUSG00000039047	Pigk	3	152714100	152980408	152714100	1	phosphatidylinositol glycan anchor biosynthesis, class K [Source:MGI Symbol;Acc:MGI:1913863]
ENSMUSG00000040624.18	1641.61	-0.183693	0.0958569	-1.91633	0.0553234	0.641674	ENSMUSG00000040624.18	ENSMUSG00000040624	Plekhg1	10	3740364	3967303	3740364	1	pleckstrin homology domain containing, family G (with RhoGef domain) member 1 [Source:MGI Symbol;Acc:MGI:2676551]
ENSMUSG00000032410.13	931.557	0.188216	0.0982341	1.916	0.0553653	0.641751	ENSMUSG00000032410.13	ENSMUSG00000032410	Xrn1	9	95954760	96057803	95954767	1	5'-3' exoribonuclease 1 [Source:MGI Symbol;Acc:MGI:891964]
ENSMUSG00000045427.13	4961.35	0.0925216	0.0483093	1.91519	0.0554682	0.642224	ENSMUSG00000045427.13	ENSMUSG00000045427	Hnrnph2	X	134601179	134607060	134601179	1	heterogeneous nuclear ribonucleoprotein H2 [Source:MGI Symbol;Acc:MGI:1201779]
ENSMUSG00000021070.6	327.92	0.272434	0.142254	1.91512	0.0554769	0.642224	ENSMUSG00000021070.6	ENSMUSG00000021070	Bdkrb2	12	105563226	105595237	105563226	1	bradykinin receptor, beta 2 [Source:MGI Symbol;Acc:MGI:102845]
ENSMUSG00000005625.15	5737.56	0.0878229	0.0458716	1.91454	0.0555514	0.642677	ENSMUSG00000005625.15	ENSMUSG00000005625	Psmd4	3	95032694	95042614	95042614	-1	proteasome (prosome, macropain) 26S subunit, non-ATPase, 4 [Source:MGI Symbol;Acc:MGI:1201670]
ENSMUSG00000027077.7	21.1138	-1.18995	0.621657	-1.91415	0.0556005	0.642837	ENSMUSG00000027077.7	ENSMUSG00000027077	Smtnl1	2	84811176	84822652	84822652	-1	smoothelin-like 1 [Source:MGI Symbol;Acc:MGI:1915928]
ENSMUSG00000021087.18	41559.4	0.112623	0.0588581	1.91347	0.0556876	0.643294	ENSMUSG00000021087.18	ENSMUSG00000021087	Rtn1	12	72211752	72409054	72235739	-1	reticulon 1 [Source:MGI Symbol;Acc:MGI:1933947]
ENSMUSG00000025609.15	5564.6	0.112363	0.0587286	1.91326	0.0557146	0.643294	ENSMUSG00000025609.15	ENSMUSG00000025609	Mkln1	6	31398735	31516811	31398735	1	muskelin 1, intracellular mediator containing kelch motifs [Source:MGI Symbol;Acc:MGI:1351638]
ENSMUSG00000025290.17	5420.36	-0.128405	0.0671218	-1.91301	0.0557462	0.643294	ENSMUSG00000025290.17	ENSMUSG00000025290	Rps24	14	24487125	24496959	24487125	1	ribosomal protein S24 [Source:MGI Symbol;Acc:MGI:98147]
ENSMUSG00000081487.1	3.73116	2.6613	1.39261	1.91102	0.0560027	NA	ENSMUSG00000081487.1	ENSMUSG00000081487	Gm13689	2	80549712	80550396	80550396	-1	predicted gene 13689 [Source:MGI Symbol;Acc:MGI:3652061]
ENSMUSG00000030733.10	2865.51	-0.103848	0.0543432	-1.91096	0.0560094	0.645753	ENSMUSG00000030733.10	ENSMUSG00000030733	Sh2b1	7	126466994	126475424	126475090	-1	SH2B adaptor protein 1 [Source:MGI Symbol;Acc:MGI:1201407]
ENSMUSG00000073400.6	25.2694	1.11719	0.5847	1.91071	0.0560425	0.645753	ENSMUSG00000073400.6	ENSMUSG00000073400	Trim10	17	36869574	36877833	36869574	1	tripartite motif-containing 10 [Source:MGI Symbol;Acc:MGI:1338757]
ENSMUSG00000015085.8	1138.1	-0.160962	0.0842515	-1.91049	0.0560702	0.645753	ENSMUSG00000015085.8	ENSMUSG00000015085	Entpd2	2	25395874	25401321	25395874	1	ectonucleoside triphosphate diphosphohydrolase 2 [Source:MGI Symbol;Acc:MGI:1096863]
ENSMUSG00000060063.9	109.113	-0.693508	0.363046	-1.91025	0.0561015	0.645753	ENSMUSG00000060063.9	ENSMUSG00000060063	Alox5ap	5	149264767	149288153	149264767	1	arachidonate 5-lipoxygenase activating protein [Source:MGI Symbol;Acc:MGI:107505]
ENSMUSG00000031897.9	1179.1	-0.149947	0.0785361	-1.90927	0.0562271	0.646398	ENSMUSG00000031897.9	ENSMUSG00000031897	Psmb10	8	105935735	105938444	105937025	-1	proteasome (prosome, macropain) subunit, beta type 10 [Source:MGI Symbol;Acc:MGI:1096380]
ENSMUSG00000029007.8	2604.26	-0.10851	0.0568334	-1.90926	0.0562286	0.646398	ENSMUSG00000029007.8	ENSMUSG00000029007	Agtrap	4	148077061	148088031	148088031	-1	angiotensin II, type I receptor-associated protein [Source:MGI Symbol;Acc:MGI:1339977]
ENSMUSG00000100968.1	2.60959	-4.8486	2.5398	-1.90905	0.0562554	NA	ENSMUSG00000100968.1	ENSMUSG00000100968	Gm2098	Y	670179	695777	695777	-1	predicted gene 2098 [Source:MGI Symbol;Acc:MGI:3780265]
ENSMUSG00000038538.17	1192.72	-0.216771	0.11362	-1.90786	0.0564089	0.647809	ENSMUSG00000038538.17	ENSMUSG00000038538	Ubn2	6	38433950	38524825	38433950	1	ubinuclein 2 [Source:MGI Symbol;Acc:MGI:2444236]
ENSMUSG00000029250.5	3466.92	0.0992674	0.0520336	1.90776	0.0564228	0.647809	ENSMUSG00000029250.5	ENSMUSG00000029250	Polr2b	5	77310147	77349324	77310147	1	polymerase (RNA) II (DNA directed) polypeptide B [Source:MGI Symbol;Acc:MGI:2388280]
ENSMUSG00000025607.15	5990.8	0.107943	0.0566026	1.90703	0.0565173	0.647809	ENSMUSG00000025607.15	ENSMUSG00000025607	Copg2	6	30747554	30896794	30896794	-1	coatomer protein complex, subunit gamma 2 [Source:MGI Symbol;Acc:MGI:1858683]
ENSMUSG00000107011.1	3.9784	3.48214	1.8264	1.90656	0.056578	NA	ENSMUSG00000107011.1	ENSMUSG00000107011	Gm42906	5	151063546	151428163	151428163	-1	predicted gene 42906 [Source:MGI Symbol;Acc:MGI:5663043]
ENSMUSG00000028351.5	1750.84	0.122271	0.0641359	1.90644	0.0565936	0.647809	ENSMUSG00000028351.5	ENSMUSG00000028351	Brinp1	4	68761514	68954397	68954397	-1	bone morphogenic protein/retinoic acid inducible neural specific 1 [Source:MGI Symbol;Acc:MGI:1928478]
ENSMUSG00000020695.14	689.309	-0.219147	0.114959	-1.90631	0.0566097	0.647809	ENSMUSG00000020695.14	ENSMUSG00000020695	Mrc2	11	105292643	105351139	105340832	1	mannose receptor, C type 2 [Source:MGI Symbol;Acc:MGI:107818]
ENSMUSG00000026921.20	1508.88	-0.154631	0.0811346	-1.90585	0.056669	0.647809	ENSMUSG00000026921.20	ENSMUSG00000026921	Egfl7	2	26580014	26593120	26580014	1	EGF-like domain 7 [Source:MGI Symbol;Acc:MGI:2449923]
ENSMUSG00000029380.11	3.94086	-2.47396	1.29821	-1.90567	0.0566934	NA	ENSMUSG00000029380.11	ENSMUSG00000029380	Cxcl1	5	90891241	90893115	90891241	1	chemokine (C-X-C motif) ligand 1 [Source:MGI Symbol;Acc:MGI:108068]
ENSMUSG00000026398.14	59.1576	-0.661912	0.347408	-1.90529	0.0567428	0.647809	ENSMUSG00000026398.14	ENSMUSG00000026398	Nr5a2	1	136842571	136960448	136960448	-1	nuclear receptor subfamily 5, group A, member 2 [Source:MGI Symbol;Acc:MGI:1346834]
ENSMUSG00000036990.13	2722.43	0.112577	0.0590881	1.90523	0.0567499	0.647809	ENSMUSG00000036990.13	ENSMUSG00000036990	Otud4	8	79639618	79677724	79639618	1	OTU domain containing 4 [Source:MGI Symbol;Acc:MGI:1098801]
ENSMUSG00000040447.15	1225.26	0.142777	0.0749437	1.90513	0.0567635	0.647809	ENSMUSG00000040447.15	ENSMUSG00000040447	Spns2	11	72451638	72489904	72489904	-1	spinster homolog 2 [Source:MGI Symbol;Acc:MGI:2384936]
ENSMUSG00000069085.5	25.9843	0.897969	0.471425	1.9048	0.0568066	0.647809	ENSMUSG00000069085.5	ENSMUSG00000069085	Dytn	1	63622851	63686927	63686927	-1	dystrotelin [Source:MGI Symbol;Acc:MGI:2685061]
ENSMUSG00000019791.12	825.367	-0.177229	0.093068	-1.9043	0.0568716	0.647809	ENSMUSG00000019791.12	ENSMUSG00000019791	Hint3	10	30608141	30629632	30618479	-1	histidine triad nucleotide binding protein 3 [Source:MGI Symbol;Acc:MGI:1914097]
ENSMUSG00000048264.16	6448.54	0.0949008	0.0498355	1.90428	0.0568736	0.647809	ENSMUSG00000048264.16	ENSMUSG00000048264	Dip2c	13	9276528	9668928	9276528	1	disco interacting protein 2 homolog C [Source:MGI Symbol;Acc:MGI:1920179]
ENSMUSG00000020721.16	1891.69	0.189835	0.0996946	1.90417	0.0568886	0.647809	ENSMUSG00000020721.16	ENSMUSG00000020721	Helz	11	107547930	107693826	107547930	1	helicase with zinc finger domain [Source:MGI Symbol;Acc:MGI:1925705]
ENSMUSG00000049265.7	1166.75	0.167122	0.0877669	1.90416	0.0568898	0.647809	ENSMUSG00000049265.7	ENSMUSG00000049265	Kcnk3	5	30588170	30625271	30588170	1	potassium channel, subfamily K, member 3 [Source:MGI Symbol;Acc:MGI:1100509]
ENSMUSG00000021298.8	14.1764	-1.28794	0.676539	-1.90372	0.0569471	0.647809	ENSMUSG00000021298.8	ENSMUSG00000021298	Gpr132	12	112850873	112868228	112860952	-1	G protein-coupled receptor 132 [Source:MGI Symbol;Acc:MGI:1890220]
ENSMUSG00000025403.5	1051.72	-0.161067	0.0846077	-1.90369	0.0569504	0.647809	ENSMUSG00000025403.5	ENSMUSG00000025403	Shmt2	10	127517123	127522444	127522386	-1	serine hydroxymethyltransferase 2 (mitochondrial) [Source:MGI Symbol;Acc:MGI:1277989]
ENSMUSG00000020868.15	2087.06	0.122775	0.0644951	1.90364	0.0569573	0.647809	ENSMUSG00000020868.15	ENSMUSG00000020868	Xylt2	11	94663851	94677515	94677515	-1	xylosyltransferase II [Source:MGI Symbol;Acc:MGI:2444797]
ENSMUSG00000116812.1	83.6732	-0.606061	0.318417	-1.90335	0.0569944	0.647826	ENSMUSG00000116812.1	ENSMUSG00000116812	Gm2792	17	6339604	6361848	6361848	-1	predicted gene 2792 [Source:MGI Symbol;Acc:MGI:3780960]
ENSMUSG00000037210.16	2160.45	0.130108	0.0683777	1.90278	0.0570693	0.648272	ENSMUSG00000037210.16	ENSMUSG00000037210	Fam193a	5	34369933	34486456	34369933	1	family with sequence homology 193, member A [Source:MGI Symbol;Acc:MGI:2447768]
ENSMUSG00000025491.14	84.9144	-0.541784	0.284852	-1.90199	0.057173	0.648622	ENSMUSG00000025491.14	ENSMUSG00000025491	Ifitm1	7	140967221	140969825	140967221	1	interferon induced transmembrane protein 1 [Source:MGI Symbol;Acc:MGI:1915963]
ENSMUSG00000101628.1	1.98482	4.40421	2.31561	1.90196	0.0571761	NA	ENSMUSG00000101628.1	ENSMUSG00000101628	Gm28177	1	52077261	52156087	52077261	1	predicted gene 28177 [Source:MGI Symbol;Acc:MGI:5578883]
ENSMUSG00000025647.16	2871.94	-0.127296	0.0669575	-1.90115	0.0572823	0.648622	ENSMUSG00000025647.16	ENSMUSG00000025647	Shisa5	9	109038565	109057777	109038565	1	shisa family member 5 [Source:MGI Symbol;Acc:MGI:1915044]
ENSMUSG00000024049.15	409.434	-1.24582	0.655311	-1.90112	0.0572865	0.648622	ENSMUSG00000024049.15	ENSMUSG00000024049	Myom1	17	71002633	71126856	71002633	1	myomesin 1 [Source:MGI Symbol;Acc:MGI:1341430]
ENSMUSG00000046761.13	763.747	-0.188541	0.099191	-1.90078	0.0573305	0.648622	ENSMUSG00000046761.13	ENSMUSG00000046761	Fam83h	15	76001093	76014336	76009498	-1	family with sequence similarity 83, member H [Source:MGI Symbol;Acc:MGI:2145900]
ENSMUSG00000035273.14	229.045	0.31449	0.165457	1.90074	0.0573366	0.648622	ENSMUSG00000035273.14	ENSMUSG00000035273	Hpse	5	100679484	100719716	100719716	-1	heparanase [Source:MGI Symbol;Acc:MGI:1343124]
ENSMUSG00000023913.17	14325.6	0.104704	0.0550862	1.90073	0.0573376	0.648622	ENSMUSG00000023913.17	ENSMUSG00000023913	Pla2g7	17	43568098	43612201	43568098	1	phospholipase A2, group VII (platelet-activating factor acetylhydrolase, plasma) [Source:MGI Symbol;Acc:MGI:1351327]
ENSMUSG00000002602.16	1866.62	-0.160105	0.0842379	-1.90063	0.0573499	0.648622	ENSMUSG00000002602.16	ENSMUSG00000002602	Axl	7	25757273	25788705	25788687	-1	AXL receptor tyrosine kinase [Source:MGI Symbol;Acc:MGI:1347244]
ENSMUSG00000058603.10	2107.72	-0.135103	0.0711028	-1.90011	0.0574182	0.64899	ENSMUSG00000058603.10	ENSMUSG00000058603	Rpl28-ps1	1	128038569	128038982	128038569	1	ribosomal protein L28, pseudogene 1 [Source:MGI Symbol;Acc:MGI:3705349]
ENSMUSG00000007216.6	383.095	-0.234275	0.123319	-1.89975	0.0574658	0.649124	ENSMUSG00000007216.6	ENSMUSG00000007216	Zfp775	6	48602063	48623227	48602063	1	zinc finger protein 775 [Source:MGI Symbol;Acc:MGI:2683557]
ENSMUSG00000001143.13	2685.63	-0.115366	0.060738	-1.89941	0.0575102	0.649222	ENSMUSG00000001143.13	ENSMUSG00000001143	Lman2l	1	36419871	36445271	36439668	-1	lectin, mannose-binding 2-like [Source:MGI Symbol;Acc:MGI:2443010]
ENSMUSG00000016349.10	67266	0.0912325	0.0480395	1.89911	0.0575495	0.649263	ENSMUSG00000016349.10	ENSMUSG00000016349	Eef1a2	2	181147653	181157014	181157014	-1	eukaryotic translation elongation factor 1 alpha 2 [Source:MGI Symbol;Acc:MGI:1096317]
ENSMUSG00000053897.15	197.28	-0.340639	0.17941	-1.89866	0.0576089	0.649299	ENSMUSG00000053897.15	ENSMUSG00000053897	Slc39a8	3	135825279	135888572	135825279	1	solute carrier family 39 (metal ion transporter), member 8 [Source:MGI Symbol;Acc:MGI:1914797]
ENSMUSG00000044252.18	5631.53	0.0954374	0.0502687	1.89855	0.0576242	0.649299	ENSMUSG00000044252.18	ENSMUSG00000044252	Osbpl1a	18	12755314	12941841	12862673	-1	oxysterol binding protein-like 1A [Source:MGI Symbol;Acc:MGI:1927551]
ENSMUSG00000030652.11	1194.93	0.145267	0.0765412	1.8979	0.0577094	0.64965	ENSMUSG00000030652.11	ENSMUSG00000030652	Coq7	7	118509659	118533356	118533301	-1	demethyl-Q 7 [Source:MGI Symbol;Acc:MGI:107207]
ENSMUSG00000001855.15	2179.11	0.119924	0.0632007	1.89751	0.0577609	0.64965	ENSMUSG00000001855.15	ENSMUSG00000001855	Nup214	2	31974436	32053975	31974436	1	nucleoporin 214 [Source:MGI Symbol;Acc:MGI:1095411]
ENSMUSG00000019984.16	1027.53	-0.186591	0.0983354	-1.8975	0.0577626	0.64965	ENSMUSG00000019984.16	ENSMUSG00000019984	Med23	10	24869986	24913681	24869986	1	mediator complex subunit 23 [Source:MGI Symbol;Acc:MGI:1917458]
ENSMUSG00000026104.14	2902.29	-0.133883	0.0705779	-1.89695	0.0578342	0.650053	ENSMUSG00000026104.14	ENSMUSG00000026104	Stat1	1	52119440	52161865	52119440	1	signal transducer and activator of transcription 1 [Source:MGI Symbol;Acc:MGI:103063]
ENSMUSG00000116557.1	17.7113	-1.13053	0.596301	-1.8959	0.0579728	0.650133	ENSMUSG00000116557.1	ENSMUSG00000116557	4933432I09Rik	16	18207822	18213863	18213533	-1	RIKEN cDNA 4933432I09 gene [Source:MGI Symbol;Acc:MGI:1914029]
ENSMUSG00000043460.7	491.384	0.215229	0.113545	1.89554	0.0580213	0.650133	ENSMUSG00000043460.7	ENSMUSG00000043460	Elfn2	15	78667331	78718771	78718113	-1	leucine rich repeat and fibronectin type III, extracellular 2 [Source:MGI Symbol;Acc:MGI:3608416]
ENSMUSG00000029281.13	190.896	-0.408794	0.215702	-1.89518	0.0580688	0.650133	ENSMUSG00000029281.13	ENSMUSG00000029281	Smr2	5	88086556	88109053	88086556	1	submaxillary gland androgen regulated protein 2 [Source:MGI Symbol;Acc:MGI:102762]
ENSMUSG00000028195.4	216.616	-0.363493	0.19183	-1.89487	0.0581097	0.650133	ENSMUSG00000028195.4	ENSMUSG00000028195	Ccn1	3	145646976	145649981	145649981	-1	cellular communication network factor 1 [Source:MGI Symbol;Acc:MGI:88613]
ENSMUSG00000031028.14	745.096	0.210699	0.111232	1.89424	0.0581938	0.650133	ENSMUSG00000031028.14	ENSMUSG00000031028	Tub	7	108950338	109034460	108950338	1	tubby bipartite transcription factor [Source:MGI Symbol;Acc:MGI:2651573]
ENSMUSG00000072720.9	96.1117	-1.96678	1.0384	-1.89405	0.0582189	0.650133	ENSMUSG00000072720.9	ENSMUSG00000072720	Myo18b	5	112688876	112896362	112896362	-1	myosin XVIIIb [Source:MGI Symbol;Acc:MGI:1921626]
ENSMUSG00000030214.7	122.887	-0.533884	0.281958	-1.89349	0.0582929	0.650133	ENSMUSG00000030214.7	ENSMUSG00000030214	Plbd1	6	136612070	136661928	136661928	-1	phospholipase B domain containing 1 [Source:MGI Symbol;Acc:MGI:1914107]
ENSMUSG00000070802.5	2053.27	0.132785	0.0701287	1.89345	0.0582978	0.650133	ENSMUSG00000070802.5	ENSMUSG00000070802	Pnmal2	7	16944682	16948828	16944682	1	PNMA-like 2 [Source:MGI Symbol;Acc:MGI:3645856]
ENSMUSG00000019802.13	4487.15	0.125025	0.066044	1.89305	0.0583511	0.650133	ENSMUSG00000019802.13	ENSMUSG00000019802	Sec63	10	42761496	42832514	42761496	1	SEC63-like (S. cerevisiae) [Source:MGI Symbol;Acc:MGI:2155302]
ENSMUSG00000020282.18	1002.05	-0.169538	0.0895626	-1.89295	0.0583643	0.650133	ENSMUSG00000020282.18	ENSMUSG00000020282	Rhbdf1	11	32209585	32222300	32222300	-1	rhomboid 5 homolog 1 [Source:MGI Symbol;Acc:MGI:104328]
ENSMUSG00000030423.7	1173.5	0.152879	0.0807636	1.89292	0.058369	0.650133	ENSMUSG00000030423.7	ENSMUSG00000030423	Pop4	7	38261996	38271423	38271423	-1	processing of precursor 4, ribonuclease P/MRP family, (S. cerevisiae) [Source:MGI Symbol;Acc:MGI:1913411]
ENSMUSG00000067889.6	11954.1	-0.108755	0.0574552	-1.89286	0.0583768	0.650133	ENSMUSG00000067889.6	ENSMUSG00000067889	Sptbn2	19	4711167	4752360	4711167	1	spectrin beta, non-erythrocytic 2 [Source:MGI Symbol;Acc:MGI:1313261]
ENSMUSG00000073530.11	646.442	0.216614	0.114446	1.89272	0.0583953	0.650133	ENSMUSG00000073530.11	ENSMUSG00000073530	Pappa2	1	158711727	158980490	158958367	-1	pappalysin 2 [Source:MGI Symbol;Acc:MGI:3051647]
ENSMUSG00000039826.13	1082.8	-0.162625	0.0859324	-1.89247	0.0584279	0.650133	ENSMUSG00000039826.13	ENSMUSG00000039826	Trub2	2	29761224	29788502	29787648	-1	TruB pseudouridine (psi) synthase family member 2 [Source:MGI Symbol;Acc:MGI:2442186]
ENSMUSG00000032040.15	409.551	-0.222433	0.11754	-1.89241	0.0584367	0.650133	ENSMUSG00000032040.15	ENSMUSG00000032040	Dcps	9	35124408	35176061	35176061	-1	decapping enzyme, scavenger [Source:MGI Symbol;Acc:MGI:1916555]
ENSMUSG00000007033.4	28.6989	-1.03915	0.549124	-1.89237	0.0584419	0.650133	ENSMUSG00000007033.4	ENSMUSG00000007033	Hspa1l	17	34972703	34979285	34972703	1	heat shock protein 1-like [Source:MGI Symbol;Acc:MGI:96231]
ENSMUSG00000073725.8	6743.62	0.102903	0.0543793	1.89231	0.0584494	0.650133	ENSMUSG00000073725.8	ENSMUSG00000073725	Lmbrd1	1	24678630	24766301	24678630	1	LMBR1 domain containing 1 [Source:MGI Symbol;Acc:MGI:1915671]
ENSMUSG00000028207.18	4620.9	0.095968	0.0507256	1.89191	0.0585035	0.650337	ENSMUSG00000028207.18	ENSMUSG00000028207	Asph	4	9448069	9669344	9475458	-1	aspartate-beta-hydroxylase [Source:MGI Symbol;Acc:MGI:1914186]
ENSMUSG00000022122.15	5559.34	0.132307	0.0699796	1.89064	0.0586718	0.650914	ENSMUSG00000022122.15	ENSMUSG00000022122	Ednrb	14	103814625	103844402	103844402	-1	endothelin receptor type B [Source:MGI Symbol;Acc:MGI:102720]
ENSMUSG00000022097.4	5.56988	2.14154	1.13295	1.89023	0.0587275	NA	ENSMUSG00000022097.4	ENSMUSG00000022097	Sftpc	14	70520949	70524081	70522176	-1	surfactant associated protein C [Source:MGI Symbol;Acc:MGI:109517]
ENSMUSG00000042306.11	7.73617	1.99489	1.05551	1.88998	0.0587607	0.650914	ENSMUSG00000042306.11	ENSMUSG00000042306	S100a14	3	90526856	90528837	90526856	1	S100 calcium binding protein A14 [Source:MGI Symbol;Acc:MGI:1913416]
ENSMUSG00000097239.7	98.2069	-0.453481	0.23996	-1.88982	0.0587815	0.650914	ENSMUSG00000097239.7	ENSMUSG00000097239	Gm27029	11	101406664	101424796	101424519	-1	predicted gene, 27029 [Source:MGI Symbol;Acc:MGI:5504144]
ENSMUSG00000073176.4	321.411	0.25134	0.132998	1.8898	0.0587842	0.650914	ENSMUSG00000073176.4	ENSMUSG00000073176	Zfp449	X	56346400	56365674	56346400	1	zinc finger protein 449 [Source:MGI Symbol;Acc:MGI:1925869]
ENSMUSG00000019866.15	141.95	-0.373195	0.197497	-1.88963	0.058808	0.650914	ENSMUSG00000019866.15	ENSMUSG00000019866	Crybg1	10	43950636	44148853	44148853	-1	crystallin beta-gamma domain containing 1 [Source:MGI Symbol;Acc:MGI:109544]
ENSMUSG00000031168.14	1403.01	-0.16045	0.0849113	-1.88961	0.0588095	0.650914	ENSMUSG00000031168.14	ENSMUSG00000031168	Ebp	X	8185329	8193512	8193512	-1	phenylalkylamine Ca2+ antagonist (emopamil) binding protein [Source:MGI Symbol;Acc:MGI:107822]
ENSMUSG00000034936.2	557.493	0.194993	0.103198	1.8895	0.0588243	0.650914	ENSMUSG00000034936.2	ENSMUSG00000034936	Arl4d	11	101665541	101667832	101665541	1	ADP-ribosylation factor-like 4D [Source:MGI Symbol;Acc:MGI:1933155]
ENSMUSG00000019772.5	7.94366	-2.3349	1.23581	-1.88937	0.0588419	0.650914	ENSMUSG00000019772.5	ENSMUSG00000019772	Vip	10	5639218	5647617	5639218	1	vasoactive intestinal polypeptide [Source:MGI Symbol;Acc:MGI:98933]
ENSMUSG00000037224.15	6773.12	0.0828494	0.0438597	1.88897	0.0588964	0.650977	ENSMUSG00000037224.15	ENSMUSG00000037224	Zfyve28	5	34194893	34288449	34288326	-1	zinc finger, FYVE domain containing 28 [Source:MGI Symbol;Acc:MGI:2684992]
ENSMUSG00000030048.5	22.8242	1.13218	0.599419	1.8888	0.0589193	0.650977	ENSMUSG00000030048.5	ENSMUSG00000030048	Gkn3	6	87383256	87388935	87388935	-1	gastrokine 3 [Source:MGI Symbol;Acc:MGI:1916138]
ENSMUSG00000009356.12	4.79725	-2.70684	1.43347	-1.88831	0.0589839	NA	ENSMUSG00000009356.12	ENSMUSG00000009356	Lpo	11	87806428	87828289	87826113	-1	lactoperoxidase [Source:MGI Symbol;Acc:MGI:1923363]
ENSMUSG00000073563.3	3458.47	0.105285	0.0557805	1.88749	0.0590951	0.651856	ENSMUSG00000073563.3	ENSMUSG00000073563	Csnk1g3	18	53862122	53955548	53862122	1	casein kinase 1, gamma 3 [Source:MGI Symbol;Acc:MGI:1917675]
ENSMUSG00000020978.10	7647.2	0.0881414	0.0467038	1.88724	0.0591275	0.651856	ENSMUSG00000020978.10	ENSMUSG00000020978	Klhdc2	12	69296681	69310687	69296681	1	kelch domain containing 2 [Source:MGI Symbol;Acc:MGI:1916804]
ENSMUSG00000041444.14	2774.54	-0.167077	0.0885354	-1.88712	0.0591435	0.651856	ENSMUSG00000041444.14	ENSMUSG00000041444	Arhgap32	9	32116136	32268446	32116136	1	Rho GTPase activating protein 32 [Source:MGI Symbol;Acc:MGI:2450166]
ENSMUSG00000048482.14	1765.67	-0.410077	0.217323	-1.88695	0.0591671	0.651856	ENSMUSG00000048482.14	ENSMUSG00000048482	Bdnf	2	109674700	109727007	109674700	1	brain derived neurotrophic factor [Source:MGI Symbol;Acc:MGI:88145]
ENSMUSG00000062591.5	33947.5	0.100238	0.0531239	1.88687	0.0591782	0.651856	ENSMUSG00000062591.5	ENSMUSG00000062591	Tubb4a	17	57080066	57087782	57087782	-1	tubulin, beta 4A class IVA [Source:MGI Symbol;Acc:MGI:107848]
ENSMUSG00000040265.16	20906.5	0.120338	0.0637997	1.88618	0.0592708	0.652299	ENSMUSG00000040265.16	ENSMUSG00000040265	Dnm3	1	161982453	162478034	162295636	-1	dynamin 3 [Source:MGI Symbol;Acc:MGI:1341299]
ENSMUSG00000016252.7	2549.77	-0.146411	0.0776289	-1.88604	0.0592902	0.652299	ENSMUSG00000016252.7	ENSMUSG00000016252	Atp5e	2	174461072	174464105	174464105	-1	ATP synthase, H+ transporting, mitochondrial F1 complex, epsilon subunit [Source:MGI Symbol;Acc:MGI:1855697]
ENSMUSG00000024053.11	87.1493	-0.489826	0.259755	-1.88572	0.0593323	0.652369	ENSMUSG00000024053.11	ENSMUSG00000024053	Emilin2	17	71252172	71311978	71310990	-1	elastin microfibril interfacer 2 [Source:MGI Symbol;Acc:MGI:2389136]
ENSMUSG00000090272.9	124.457	-0.391427	0.207645	-1.88508	0.0594192	0.652439	ENSMUSG00000090272.9	ENSMUSG00000090272	Mndal	1	173849126	173880881	173862499	-1	myeloid nuclear differentiation antigen like [Source:MGI Symbol;Acc:MGI:3780953]
ENSMUSG00000038658.15	1043.46	-0.155493	0.0824872	-1.88506	0.0594221	0.652439	ENSMUSG00000038658.15	ENSMUSG00000038658	Ric1	19	29522282	29606829	29522282	1	RAB6A GEF complex partner 1 [Source:MGI Symbol;Acc:MGI:1924893]
ENSMUSG00000018900.7	826.362	0.174486	0.0925958	1.88439	0.0595129	0.652439	ENSMUSG00000018900.7	ENSMUSG00000018900	Slc22a5	11	53864542	53891660	53891660	-1	solute carrier family 22 (organic cation transporter), member 5 [Source:MGI Symbol;Acc:MGI:1329012]
ENSMUSG00000041488.16	293.336	-0.317514	0.168527	-1.88406	0.0595574	0.652439	ENSMUSG00000041488.16	ENSMUSG00000041488	Stx3	19	11775118	11819403	11818811	-1	syntaxin 3 [Source:MGI Symbol;Acc:MGI:103077]
ENSMUSG00000048416.15	192.176	-0.543699	0.28858	-1.88405	0.0595588	0.652439	ENSMUSG00000048416.15	ENSMUSG00000048416	Mlf1	3	67374097	67400003	67374097	1	myeloid leukemia factor 1 [Source:MGI Symbol;Acc:MGI:1341819]
ENSMUSG00000030555.16	226.494	0.34044	0.180707	1.88394	0.0595732	0.652439	ENSMUSG00000030555.16	ENSMUSG00000030555	Ttc23	7	67647410	67762912	67647410	1	tetratricopeptide repeat domain 23 [Source:MGI Symbol;Acc:MGI:1914259]
ENSMUSG00000024327.16	5709.66	-0.0933335	0.0495499	-1.88362	0.0596159	0.652439	ENSMUSG00000024327.16	ENSMUSG00000024327	Slc39a7	17	34028269	34031682	34031620	-1	solute carrier family 39 (zinc transporter), member 7 [Source:MGI Symbol;Acc:MGI:95909]
ENSMUSG00000052957.8	376.326	-0.240964	0.127938	-1.88344	0.059641	0.652439	ENSMUSG00000052957.8	ENSMUSG00000052957	Gas1	13	60174405	60177365	60177365	-1	growth arrest specific 1 [Source:MGI Symbol;Acc:MGI:95655]
ENSMUSG00000025512.15	2199.91	-0.111038	0.0589647	-1.88313	0.059683	0.652439	ENSMUSG00000025512.15	ENSMUSG00000025512	Chid1	7	141493136	141539857	141539816	-1	chitinase domain containing 1 [Source:MGI Symbol;Acc:MGI:1915288]
ENSMUSG00000062760.11	5211.8	0.112429	0.0597067	1.88302	0.0596977	0.652439	ENSMUSG00000062760.11	ENSMUSG00000062760	Shisal1	15	84379203	84447097	84447097	-1	shisa like 1 [Source:MGI Symbol;Acc:MGI:1919551]
ENSMUSG00000026872.18	3419.13	-0.12984	0.0689831	-1.8822	0.0598093	0.653037	ENSMUSG00000026872.18	ENSMUSG00000026872	Zeb2	2	44983632	45117395	45117395	-1	zinc finger E-box binding homeobox 2 [Source:MGI Symbol;Acc:MGI:1344407]
ENSMUSG00000058443.5	7701.91	-0.098603	0.0523957	-1.88189	0.0598509	0.653037	ENSMUSG00000058443.5	ENSMUSG00000058443	Rpl10-ps3	9	50344201	50344968	50344968	-1	ribosomal protein L10, pseudogene 3 [Source:MGI Symbol;Acc:MGI:3704336]
ENSMUSG00000020067.8	101.058	-0.807545	0.429205	-1.88149	0.0599054	0.653037	ENSMUSG00000020067.8	ENSMUSG00000020067	Mypn	10	63115795	63203952	63203952	-1	myopalladin [Source:MGI Symbol;Acc:MGI:1916052]
ENSMUSG00000045328.11	81.5528	-0.9081	0.482679	-1.88137	0.0599212	0.653037	ENSMUSG00000045328.11	ENSMUSG00000045328	Cenpe	3	135212537	135273611	135212537	1	centromere protein E [Source:MGI Symbol;Acc:MGI:1098230]
ENSMUSG00000035944.17	962.485	-0.171679	0.0912557	-1.88129	0.0599321	0.653037	ENSMUSG00000035944.17	ENSMUSG00000035944	Ttc38	15	85832306	85858822	85832306	1	tetratricopeptide repeat domain 38 [Source:MGI Symbol;Acc:MGI:2146198]
ENSMUSG00000087412.4	5.14233	-3.12709	1.66235	-1.88113	0.0599545	NA	ENSMUSG00000087412.4	ENSMUSG00000087412	Gm15501	7	93178983	93184176	93184176	-1	predicted pseudogene 15501 [Source:MGI Symbol;Acc:MGI:3704296]
ENSMUSG00000003039.9	3958.54	0.0952084	0.0506192	1.88087	0.0599891	0.653082	ENSMUSG00000003039.9	ENSMUSG00000003039	Fam32a	8	72219730	72224418	72219730	1	family with sequence similarity 32, member A [Source:MGI Symbol;Acc:MGI:1915172]
ENSMUSG00000062694.7	15.489	-1.63954	0.871979	-1.88025	0.0600737	0.653082	ENSMUSG00000062694.7	ENSMUSG00000062694	Cav3	6	112459505	112472872	112459505	1	caveolin 3 [Source:MGI Symbol;Acc:MGI:107570]
ENSMUSG00000021066.9	10072.5	0.118329	0.0629358	1.88015	0.0600872	0.653082	ENSMUSG00000021066.9	ENSMUSG00000021066	Atl1	12	69892614	69966417	69892614	1	atlastin GTPase 1 [Source:MGI Symbol;Acc:MGI:1921241]
ENSMUSG00000052133.16	356.925	0.268685	0.142922	1.87994	0.0601157	0.653082	ENSMUSG00000052133.16	ENSMUSG00000052133	Sema5b	16	35541145	35664732	35541145	1	sema domain, seven thrombospondin repeats (type 1 and type 1-like), transmembrane domain (TM) and short cytoplasmic domain, (semaphorin) 5B [Source:MGI Symbol;Acc:MGI:107555]
ENSMUSG00000105265.4	541.922	-0.265898	0.14144	-1.87994	0.0601159	0.653082	ENSMUSG00000105265.4	ENSMUSG00000105265	Sox2ot	3	34104270	34682619	34104270	1	SOX2 overlapping transcript (non-protein coding) [Source:MGI Symbol;Acc:MGI:2444112]
ENSMUSG00000013419.7	3022.85	-0.126037	0.0670694	-1.87921	0.0602158	0.653417	ENSMUSG00000013419.7	ENSMUSG00000013419	Zfp651	9	121759330	121771742	121759330	1	zinc finger protein 651 [Source:MGI Symbol;Acc:MGI:2670992]
ENSMUSG00000070305.10	512.82	-0.211717	0.112664	-1.87919	0.0602186	0.653417	ENSMUSG00000070305.10	ENSMUSG00000070305	Mpzl3	9	45055186	45077436	45055186	1	myelin protein zero-like 3 [Source:MGI Symbol;Acc:MGI:2442647]
ENSMUSG00000028530.14	23186.8	0.085219	0.0453667	1.87845	0.06032	0.654069	ENSMUSG00000028530.14	ENSMUSG00000028530	Jak1	4	101152367	101265282	101265282	-1	Janus kinase 1 [Source:MGI Symbol;Acc:MGI:96628]
ENSMUSG00000040697.10	2072.66	0.111501	0.059365	1.87822	0.0603507	0.654069	ENSMUSG00000040697.10	ENSMUSG00000040697	Dnajc16	4	141760189	141790931	141790891	-1	DnaJ heat shock protein family (Hsp40) member C16 [Source:MGI Symbol;Acc:MGI:2442146]
ENSMUSG00000048756.11	5470.8	0.107382	0.0571931	1.87753	0.0604456	0.654531	ENSMUSG00000048756.11	ENSMUSG00000048756	Foxo3	10	42181841	42276755	42276752	-1	forkhead box O3 [Source:MGI Symbol;Acc:MGI:1890081]
ENSMUSG00000024059.10	5239	0.142561	0.0759359	1.87738	0.0604654	0.654531	ENSMUSG00000024059.10	ENSMUSG00000024059	Clip4	17	71768473	71864273	71768473	1	CAP-GLY domain containing linker protein family, member 4 [Source:MGI Symbol;Acc:MGI:1919100]
ENSMUSG00000073600.5	211.633	-0.363758	0.193852	-1.87648	0.06059	0.65549	ENSMUSG00000073600.5	ENSMUSG00000073600	Prob1	18	35650351	35655238	35655238	-1	proline rich basic protein 1 [Source:MGI Symbol;Acc:MGI:2686460]
ENSMUSG00000030560.17	775.242	-0.2231	0.118929	-1.87591	0.0606683	0.655788	ENSMUSG00000030560.17	ENSMUSG00000030560	Ctsc	7	88278085	88310888	88278085	1	cathepsin C [Source:MGI Symbol;Acc:MGI:109553]
ENSMUSG00000031779.3	8.9412	-1.64121	0.874962	-1.87575	0.0606897	0.655788	ENSMUSG00000031779.3	ENSMUSG00000031779	Ccl22	8	94745590	94751699	94745590	1	chemokine (C-C motif) ligand 22 [Source:MGI Symbol;Acc:MGI:1306779]
ENSMUSG00000053164.6	81.9668	0.554043	0.295471	1.87512	0.0607765	0.656241	ENSMUSG00000053164.6	ENSMUSG00000053164	Gpr21	2	37516332	37520603	37516332	1	G protein-coupled receptor 21 [Source:MGI Symbol;Acc:MGI:2441890]
ENSMUSG00000031371.14	304.208	0.270413	0.144242	1.87472	0.0608319	0.656241	ENSMUSG00000031371.14	ENSMUSG00000031371	Haus7	X	73437315	73459044	73459044	-1	HAUS augmin-like complex, subunit 7 [Source:MGI Symbol;Acc:MGI:1920988]
ENSMUSG00000087028.7	14.2214	-1.32358	0.706092	-1.87452	0.060859	0.656241	ENSMUSG00000087028.7	ENSMUSG00000087028	Gm13387	2	25122603	25145396	25145396	-1	predicted gene 13387 [Source:MGI Symbol;Acc:MGI:3651242]
ENSMUSG00000038965.17	8929.12	0.0759645	0.0405275	1.87439	0.0608761	0.656241	ENSMUSG00000038965.17	ENSMUSG00000038965	Ube2l3	16	17152013	17202649	17202649	-1	ubiquitin-conjugating enzyme E2L 3 [Source:MGI Symbol;Acc:MGI:109240]
ENSMUSG00000039405.7	990.415	-0.191773	0.10233	-1.87406	0.0609217	0.656343	ENSMUSG00000039405.7	ENSMUSG00000039405	Prss23	7	89507783	89527187	89517586	-1	protease, serine 23 [Source:MGI Symbol;Acc:MGI:1923703]
ENSMUSG00000026825.17	41088.2	0.105964	0.0565674	1.87323	0.0610368	0.657194	ENSMUSG00000026825.17	ENSMUSG00000026825	Dnm1	2	32308471	32353338	32353263	-1	dynamin 1 [Source:MGI Symbol;Acc:MGI:107384]
ENSMUSG00000052726.16	456.118	0.206067	0.110057	1.87237	0.0611558	0.657427	ENSMUSG00000052726.16	ENSMUSG00000052726	Kcnt2	1	140246158	140612067	140246158	1	potassium channel, subfamily T, member 2 [Source:MGI Symbol;Acc:MGI:3036273]
ENSMUSG00000022283.15	10329.7	-0.083031	0.0443501	-1.87217	0.0611826	0.657427	ENSMUSG00000022283.15	ENSMUSG00000022283	Pabpc1	15	36595661	36609668	36608973	-1	poly(A) binding protein, cytoplasmic 1 [Source:MGI Symbol;Acc:MGI:1349722]
ENSMUSG00000040229.11	29.9383	-0.821799	0.439065	-1.8717	0.061248	0.657427	ENSMUSG00000040229.11	ENSMUSG00000040229	Gpr34	X	13632089	13640858	13632089	1	G protein-coupled receptor 34 [Source:MGI Symbol;Acc:MGI:1346334]
ENSMUSG00000020941.7	431.728	0.236065	0.126136	1.87151	0.0612749	0.657427	ENSMUSG00000020941.7	ENSMUSG00000020941	Map3k14	11	103219762	103267472	103267472	-1	mitogen-activated protein kinase kinase kinase 14 [Source:MGI Symbol;Acc:MGI:1858204]
ENSMUSG00000011427.16	699.299	0.172809	0.0923392	1.87146	0.061282	0.657427	ENSMUSG00000011427.16	ENSMUSG00000011427	Zfp790	7	29816114	29831005	29816114	1	zinc finger protein 790 [Source:MGI Symbol;Acc:MGI:1923431]
ENSMUSG00000028132.15	6803.62	0.107344	0.0573596	1.87143	0.0612854	0.657427	ENSMUSG00000028132.15	ENSMUSG00000028132	Tlcd4	3	121201761	121283098	121283098	-1	TLC domain containing 4 [Source:MGI Symbol;Acc:MGI:1923195]
ENSMUSG00000036052.14	959.271	-0.19133	0.10226	-1.87102	0.0613421	0.657427	ENSMUSG00000036052.14	ENSMUSG00000036052	Dnajb5	4	42949814	42959425	42949814	1	DnaJ heat shock protein family (Hsp40) member B5 [Source:MGI Symbol;Acc:MGI:1930018]
ENSMUSG00000021911.16	2179.62	0.129034	0.068966	1.87098	0.0613478	0.657427	ENSMUSG00000021911.16	ENSMUSG00000021911	Parg	14	32201949	32297550	32201949	1	poly (ADP-ribose) glycohydrolase [Source:MGI Symbol;Acc:MGI:1347094]
ENSMUSG00000045519.15	418.12	-0.219896	0.117671	-1.86873	0.0616604	0.659607	ENSMUSG00000045519.15	ENSMUSG00000045519	Zfp560	9	20345136	20385177	20385177	-1	zinc finger protein 560 [Source:MGI Symbol;Acc:MGI:1915280]
[truncated: 19,778 more rows]

## Sheet: ClueGO Map UP
ID	Term	Ontology Source	Term PValue	Term PValue Corrected with None	Group PValue	Group PValue Corrected with None	GOLevels	GOGroups	% Associated Genes	Nr. Genes	Associated Genes Found
[truncated: 78 more rows]

[truncated: 2 more sheets: GOKEGG UP, GOKEGG DOWN]
