# Supplementary material for: Leptin Signalling Promotes Axonal Regeneration in the Peripheral and Central Nervous System
Source: Research Square preprint supplement (doi:10.21203/rs.3.rs-2534602/v1), 2023-02-09
Supplement: Supplementary file 2 [file 6f6af0906e9fcc7574f0821c.xlsx]

## Sheet: Leptin v GFP RNAseq
GeneID	baseMean	log2FoldChange	lfcSE	stat	pvalue	padj	gene_name	chr	start_position	end_position	strand	gene_des	pvalue.padj
ENSMUSG00000053113	3103.77	1.21861	0.0829947	14.6829	8.29e-49	1.31e-44	Socs3	11	117856905	117860873	-1	suppressor of cytokine signaling 3 [Source:MGI Symbol;Acc:MGI:1201791]	1.74413e-44
ENSMUSG00000021250	7133.56	1.47337	0.11579	12.7245	4.32e-37	3.4e-33	Fos	12	85520664	85524047	1	FBJ osteosarcoma oncogene [Source:MGI Symbol;Acc:MGI:95574]	4.54442e-33
ENSMUSG00000028195	1203.14	1.89502	0.155369	12.1969	3.23e-34	1.69e-30	Ccn1	3	145352731	145355736	-1	cellular communication network factor 1 [Source:MGI Symbol;Acc:MGI:88613]	2.2652e-30
ENSMUSG00000038418	5331.55	1.13036	0.0939211	12.0352	2.32e-33	9.13e-30	Egr1	18	34992876	34998037	1	early growth response 1 [Source:MGI Symbol;Acc:MGI:95295]	1.22026e-29
ENSMUSG00000003032	248.892	1.74128	0.146312	11.9012	1.17e-32	3.67e-29	Klf4	4	55527143	55532466	-1	Kruppel-like factor 4 (gut) [Source:MGI Symbol;Acc:MGI:1342287]	4.92313e-29
ENSMUSG00000100826	1303.83	0.955055	0.0872578	10.9452	7.01e-28	1.84e-24	Snhg14	7	58957672	59625507	-1	small nucleolar RNA host gene 14 [Source:MGI Symbol;Acc:MGI:1289201]	2.45806e-24
ENSMUSG00000040690	2167.79	1.39882	0.128607	10.8767	1.49e-27	3.35e-24	Col16a1	4	129941633	129993076	1	collagen, type XVI, alpha 1 [Source:MGI Symbol;Acc:MGI:1095396]	4.4783e-24
ENSMUSG00000035356	257.396	1.74013	0.160542	10.8391	2.25e-27	4.42e-24	Nfkbiz	16	55631738	55659262	-1	nuclear factor of kappa light polypeptide gene enhancer in B cells inhibitor, zeta [Source:MGI Symbol;Acc:MGI:1931595]	5.91722e-24
ENSMUSG00000020423	816.848	1.42328	0.132998	10.7016	1e-26	1.75e-23	Btg2	1	134002908	134006858	-1	BTG anti-proliferation factor 2 [Source:MGI Symbol;Acc:MGI:108384]	2.33767e-23
ENSMUSG00000003545	2424.22	2.69591	0.252359	10.6829	1.22e-26	1.93e-23	Fosb	7	19036621	19043976	-1	FBJ osteosarcoma oncogene B [Source:MGI Symbol;Acc:MGI:95575]	2.56676e-23
ENSMUSG00000071337	534.285	1.4462	0.139478	10.3686	3.44e-25	4.93e-22	Tia1	6	86381201	86410387	1	cytotoxic granule-associated RNA binding protein 1 [Source:MGI Symbol;Acc:MGI:107914]	6.57947e-22
ENSMUSG00000063511	3284.97	1.15682	0.117637	9.83385	8.05e-23	1.06e-19	Snrnp70	7	45025877	45045166	-1	small nuclear ribonucleoprotein 70 (U1) [Source:MGI Symbol;Acc:MGI:98341]	1.41137e-19
ENSMUSG00000037868	390.546	1.5059	0.153643	9.80125	1.11e-22	1.35e-19	Egr2	10	67371305	67378018	1	early growth response 2 [Source:MGI Symbol;Acc:MGI:95296]	1.79641e-19
ENSMUSG00000020836	1835.08	0.605839	0.0651819	9.29459	1.48e-20	1.66e-17	Coro6	11	77353237	77361310	1	coronin 6 [Source:MGI Symbol;Acc:MGI:2183448]	2.22412e-17
ENSMUSG00000022974	496.596	1.28559	0.141796	9.06647	1.23e-19	1.29e-16	Paxbp1	16	90810925	90841431	-1	PAX3 and PAX7 binding protein 1 [Source:MGI Symbol;Acc:MGI:1914617]	1.7252e-16
ENSMUSG00000018899	711.408	1.4004	0.154725	9.05089	1.42e-19	1.39e-16	Irf1	11	53660841	53669200	1	interferon regulatory factor 1 [Source:MGI Symbol;Acc:MGI:96590]	1.86721e-16
ENSMUSG00000053560	758.856	0.910416	0.100688	9.04196	1.54e-19	1.42e-16	Ier2	8	85387960	85389483	-1	immediate early response 2 [Source:MGI Symbol;Acc:MGI:104815]	1.90589e-16
ENSMUSG00000017677	1175.92	1.12226	0.125084	8.97212	2.91e-19	2.54e-16	Wsb1	11	79130198	79145497	-1	WD repeat and SOCS box-containing 1 [Source:MGI Symbol;Acc:MGI:1926139]	3.4013e-16
ENSMUSG00000036281	544.458	1.15767	0.129795	8.91924	4.7e-19	3.89e-16	Snapc4	2	26252777	26270665	-1	small nuclear RNA activating complex, polypeptide 4 [Source:MGI Symbol;Acc:MGI:2443935]	5.20438e-16
ENSMUSG00000026826	150.587	1.7109	0.194714	8.78676	1.54e-18	1.21e-15	Nr4a2	2	56996842	57014015	-1	nuclear receptor subfamily 4, group A, member 2 [Source:MGI Symbol;Acc:MGI:1352456]	1.62e-15
ENSMUSG00000079487	1009.75	1.01034	0.116388	8.68075	3.93e-18	2.95e-15	Med12	X	100317636	100341071	1	mediator complex subunit 12 [Source:MGI Symbol;Acc:MGI:1926212]	3.9373e-15
ENSMUSG00000020926	11127.5	0.564215	0.0655072	8.61303	7.12e-18	5.09e-15	Adam11	11	102652265	102671088	1	a disintegrin and metallopeptidase domain 11 [Source:MGI Symbol;Acc:MGI:1098667]	6.80899e-15
ENSMUSG00000040459	1922.67	1.09179	0.128971	8.46539	2.55e-17	1.75e-14	Arglu1	8	8715075	8740521	-1	arginine and glutamate rich 1 [Source:MGI Symbol;Acc:MGI:2442985]	2.33258e-14
ENSMUSG00000030002	1102.66	1.0221	0.121898	8.38487	5.08e-17	3.33e-14	Dusp11	6	85919250	85938649	-1	dual specificity phosphatase 11 (RNA/RNP complex 1-interacting) [Source:MGI Symbol;Acc:MGI:1919352]	4.45326e-14
ENSMUSG00000004187	1908.95	0.813844	0.0973467	8.36026	6.26e-17	3.94e-14	Kifc2	15	76544058	76552396	1	kinesin family member C2 [Source:MGI Symbol;Acc:MGI:109187]	5.26817e-14
ENSMUSG00000041488	231.952	1.29702	0.155465	8.34288	7.25e-17	4.39e-14	Stx3	19	11752482	11796767	-1	syntaxin 3 [Source:MGI Symbol;Acc:MGI:103077]	5.86664e-14
ENSMUSG00000038564	2311.45	0.457958	0.0554285	8.26214	1.43e-16	8.34e-14	Ift172	5	31410621	31448460	-1	intraflagellar transport 172 [Source:MGI Symbol;Acc:MGI:2682064]	1.11429e-13
ENSMUSG00000044783	2254.89	0.448106	0.0548381	8.17144	3.05e-16	1.71e-13	Hjurp	1	88190193	88205355	-1	Holliday junction recognition protein [Source:MGI Symbol;Acc:MGI:2685821]	2.29175e-13
ENSMUSG00000027829	473.734	1.25981	0.154991	8.12826	4.35e-16	2.36e-13	Ccnl1	3	65853572	65865670	-1	cyclin L1 [Source:MGI Symbol;Acc:MGI:1922664]	3.15585e-13
ENSMUSG00000052837	2815.4	0.749055	0.0928735	8.06533	7.3e-16	3.83e-13	Junb	8	85701113	85705347	-1	jun B proto-oncogene [Source:MGI Symbol;Acc:MGI:96647]	5.11949e-13
ENSMUSG00000061028	821.965	1.25219	0.160721	7.79107	6.64e-15	3.37e-12	Clasrp	7	19314960	19338411	-1	CLK4-associating serine/arginine rich protein [Source:MGI Symbol;Acc:MGI:1855695]	4.50642e-12
ENSMUSG00000044786	2422.85	1.83883	0.23782	7.73201	1.06e-14	5.16e-12	Zfp36	7	28076209	28079678	-1	zinc finger protein 36 [Source:MGI Symbol;Acc:MGI:99180]	6.88549e-12
ENSMUSG00000026199	303.344	0.958182	0.123968	7.72926	1.08e-14	5.16e-12	Ankzf1	1	75168795	75176031	1	ankyrin repeat and zinc finger domain containing 1 [Source:MGI Symbol;Acc:MGI:1098746]	6.88549e-12
ENSMUSG00000033730	617.845	1.05234	0.136253	7.72348	1.13e-14	5.24e-12	Egr3	14	70314652	70320063	1	early growth response 3 [Source:MGI Symbol;Acc:MGI:1306780]	6.99237e-12
ENSMUSG00000097296	57.4924	2.51057	0.325364	7.71619	1.2e-14	5.39e-12	Gm26532	8	84935549	84936238	1	predicted gene, 26532 [Source:MGI Symbol;Acc:MGI:5477026]	7.21337e-12
ENSMUSG00000029823	2780.81	0.512835	0.0666182	7.69813	1.38e-14	6.04e-12	Luc7l2	6	38528269	38586405	1	LUC7-like 2 (S. cerevisiae) [Source:MGI Symbol;Acc:MGI:2183260]	8.06495e-12
ENSMUSG00000024948	2108.38	0.951889	0.123908	7.68223	1.56e-14	6.65e-12	Map4k2	19	6391165	6405645	1	mitogen-activated protein kinase kinase kinase kinase 2 [Source:MGI Symbol;Acc:MGI:1346883]	8.8705e-12
ENSMUSG00000028809	2157.65	0.708245	0.0922905	7.67408	1.67e-14	6.9e-12	Srrm1	4	135047795	135080632	-1	serine/arginine repetitive matrix 1 [Source:MGI Symbol;Acc:MGI:1858303]	9.24609e-12
ENSMUSG00000033902	593.784	0.888971	0.117792	7.54693	4.46e-14	1.8e-11	Mapkbp1	2	119803180	119857889	1	mitogen-activated protein kinase binding protein 1 [Source:MGI Symbol;Acc:MGI:1347004]	2.406e-11
ENSMUSG00000029068	835.754	1.20459	0.159757	7.54014	4.69e-14	1.85e-11	Ccnl2	4	155896946	155909000	1	cyclin L2 [Source:MGI Symbol;Acc:MGI:1927119]	2.46682e-11
ENSMUSG00000024190	1206.13	0.748756	0.0999431	7.49182	6.79e-14	2.61e-11	Dusp1	17	26724564	26781102	-1	dual specificity phosphatase 1 [Source:MGI Symbol;Acc:MGI:105120]	3.48426e-11
ENSMUSG00000031508	658.935	0.962559	0.128846	7.47065	7.98e-14	2.94e-11	Ankrd10	8	11661583	11685757	-1	ankyrin repeat domain 10 [Source:MGI Symbol;Acc:MGI:1921840]	3.93047e-11
ENSMUSG00000055065	7835.78	0.772135	0.103387	7.46841	8.12e-14	2.94e-11	Ddx17	15	79411937	79430942	-1	DEAD box helicase 17 [Source:MGI Symbol;Acc:MGI:1914290]	3.93047e-11
ENSMUSG00000097451	12138	0.680695	0.091164	7.46671	8.22e-14	2.94e-11	Rian	12	109570242	109628150	1	RNA imprinted and accumulated in nucleus [Source:MGI Symbol;Acc:MGI:1922995]	3.93047e-11
ENSMUSG00000052707	2330.14	0.650302	0.0878854	7.39943	1.37e-13	4.78e-11	Tnrc6a	7	122723108	122794519	1	trinucleotide repeat containing 6a [Source:MGI Symbol;Acc:MGI:2385292]	6.40521e-11
ENSMUSG00000022475	344.964	1.51429	0.204918	7.38974	1.47e-13	5.03e-11	Hdac7	15	97690545	97742383	-1	histone deacetylase 7 [Source:MGI Symbol;Acc:MGI:1891835]	6.72333e-11
ENSMUSG00000002496	2623.97	0.521811	0.0706735	7.38341	1.54e-13	5.17e-11	Tsc2	17	24814790	24851604	-1	TSC complex subunit 2 [Source:MGI Symbol;Acc:MGI:102548]	6.89363e-11
ENSMUSG00000024045	1676.03	0.617864	0.0837244	7.37974	1.59e-13	5.2e-11	Akap8	17	32522646	32540212	-1	A kinase (PRKA) anchor protein 8 [Source:MGI Symbol;Acc:MGI:1928488]	6.96917e-11
ENSMUSG00000116594	122.801	2.04731	0.279488	7.32521	2.39e-13	7.66e-11	Gm49601	16	18439216	18445177	-1	predicted gene, 49601 [Source:MGI Symbol;Acc:MGI:6215011]	1.02619e-10
ENSMUSG00000035967	769.257	1.05649	0.144597	7.30645	2.74e-13	8.63e-11	Ints6l	X	55500217	55553203	1	integrator complex subunit 6 like [Source:MGI Symbol;Acc:MGI:2442593]	1.15294e-10
ENSMUSG00000035024	336.923	1.04491	0.143539	7.27963	3.35e-13	1.03e-10	Ncapd3	9	26941471	27006611	1	non-SMC condensin II complex, subunit D3 [Source:MGI Symbol;Acc:MGI:2142989]	1.38197e-10
ENSMUSG00000006476	2276.42	0.590284	0.081596	7.23423	4.68e-13	1.42e-10	Nsmf	2	24944367	24952893	1	NMDA receptor synaptonuclear signaling and neuronal migration factor [Source:MGI Symbol;Acc:MGI:1861755]	1.89351e-10
ENSMUSG00000022211	2627.15	0.835098	0.116826	7.14819	8.79e-13	2.61e-10	Carmil3	14	55728108	55745729	1	capping protein regulator and myosin 1 linker 3 [Source:MGI Symbol;Acc:MGI:2448573]	3.4893e-10
ENSMUSG00000042156	619.171	0.840525	0.117848	7.1323	9.87e-13	2.83e-10	Dzip1	14	119112932	119162872	-1	DAZ interacting protein 1 [Source:MGI Symbol;Acc:MGI:1914311]	3.79085e-10
ENSMUSG00000009079	2344.01	0.692845	0.0971485	7.13181	9.91e-13	2.83e-10	Ewsr1	11	5019689	5049266	-1	Ewing sarcoma breakpoint region 1 [Source:MGI Symbol;Acc:MGI:99960]	3.79085e-10
ENSMUSG00000016346	8246.88	0.384717	0.0541079	7.11018	1.16e-12	3.26e-10	Kcnq2	2	180717372	180777093	-1	potassium voltage-gated channel, subfamily Q, member 2 [Source:MGI Symbol;Acc:MGI:1309503]	4.35808e-10
ENSMUSG00000085334	78.055	2.20047	0.311278	7.06915	1.56e-12	4.3e-10	Gm12940	4	126927524	126943191	1	predicted gene 12940 [Source:MGI Symbol;Acc:MGI:3702626]	5.75804e-10
ENSMUSG00000025283	1881.68	0.750992	0.106742	7.03556	1.98e-12	5.38e-10	Sat1	X	153996128	153999445	-1	spermidine/spermine N1-acetyl transferase 1 [Source:MGI Symbol;Acc:MGI:98233]	7.18228e-10
ENSMUSG00000032295	1653.03	0.554821	0.078886	7.0332	2.02e-12	5.38e-10	Man2c1	9	57037974	57050006	1	mannosidase, alpha, class 2C, member 1 [Source:MGI Symbol;Acc:MGI:1920994]	7.20318e-10
ENSMUSG00000028248	1839.82	1.61562	0.23052	7.00859	2.41e-12	6.31e-10	Pnisr	4	21847583	21876475	1	PNN interacting serine/arginine-rich [Source:MGI Symbol;Acc:MGI:1913875]	8.45066e-10
ENSMUSG00000090086	215.485	1.57964	0.225826	6.99491	2.65e-12	6.85e-10	AI480526	5	123271786	123279729	-1	expressed sequence AI480526 [Source:MGI Symbol;Acc:MGI:2140910]	9.13989e-10
ENSMUSG00000034160	3435.53	0.609822	0.0872599	6.98856	2.78e-12	7.05e-10	Ogt	X	100683666	100727957	1	O-linked N-acetylglucosamine (GlcNAc) transferase (UDP-N-acetylglucosamine:polypeptide-N-acetylglucosaminyl transferase) [Source:MGI Symbol;Acc:MGI:1339639]	9.43362e-10
ENSMUSG00000007850	2984.49	0.533619	0.0766325	6.96336	3.32e-12	8.3e-10	Hnrnph1	11	50267817	50277355	1	heterogeneous nuclear ribonucleoprotein H1 [Source:MGI Symbol;Acc:MGI:1891925]	1.10872e-09
ENSMUSG00000034616	688.271	1.16694	0.167772	6.95552	3.51e-12	8.64e-10	Ssh3	19	4311696	4319208	-1	slingshot protein phosphatase 3 [Source:MGI Symbol;Acc:MGI:2683546]	1.15386e-09
ENSMUSG00000037243	265.17	1.31084	0.189398	6.92106	4.48e-12	1.09e-09	Zfp692	11	58197895	58205453	1	zinc finger protein 692 [Source:MGI Symbol;Acc:MGI:2144276]	1.45007e-09
ENSMUSG00000034156	1195.31	0.699213	0.101413	6.89471	5.4e-12	1.29e-09	Tspoap1	11	87651367	87676754	1	TSPO associated protein 1 [Source:MGI Symbol;Acc:MGI:2450877]	1.72137e-09
ENSMUSG00000004626	187.609	1.30998	0.190276	6.88464	5.79e-12	1.36e-09	Stxbp2	8	3680955	3693644	1	syntaxin binding protein 2 [Source:MGI Symbol;Acc:MGI:107370]	1.81815e-09
ENSMUSG00000047909	362.037	0.817459	0.11922	6.85673	7.05e-12	1.63e-09	Ankrd16	2	11782687	11795140	1	ankyrin repeat domain 16 [Source:MGI Symbol;Acc:MGI:2444796]	2.18125e-09
ENSMUSG00000029439	1371.05	0.777929	0.113676	6.84341	7.73e-12	1.76e-09	Sfswap	5	129578285	129648448	1	splicing factor SWAP [Source:MGI Symbol;Acc:MGI:101760]	2.35698e-09
ENSMUSG00000074264	275.114	1.83201	0.268087	6.83364	8.28e-12	1.86e-09	Amy1	3	113349359	113400348	-1	amylase 1, salivary [Source:MGI Symbol;Acc:MGI:88019]	2.48861e-09
ENSMUSG00000033705	377.456	1.07755	0.157756	6.8305	8.46e-12	1.88e-09	Stard9	2	120459602	120562376	1	START domain containing 9 [Source:MGI Symbol;Acc:MGI:3045258]	2.5069e-09
ENSMUSG00000005899	747.942	0.690226	0.101362	6.80948	9.79e-12	2.14e-09	Smpd4	16	17437218	17462692	1	sphingomyelin phosphodiesterase 4 [Source:MGI Symbol;Acc:MGI:1924876]	2.86072e-09
ENSMUSG00000111394	222.178	1.96119	0.290632	6.74801	1.5e-11	3.23e-09	Gm49759	9	59580097	59583983	1	predicted gene, 49759 [Source:MGI Symbol;Acc:MGI:6215263]	4.32152e-09
ENSMUSG00000029547	2935.75	0.446542	0.0661982	6.74554	1.52e-11	3.24e-09	Ints1	5	139737037	139761429	-1	integrator complex subunit 1 [Source:MGI Symbol;Acc:MGI:1915760]	4.32152e-09
ENSMUSG00000031766	102.537	2.01104	0.29845	6.73829	1.6e-11	3.36e-09	Slc12a3	8	95055829	95092842	1	solute carrier family 12, member 3 [Source:MGI Symbol;Acc:MGI:108114]	4.48832e-09
ENSMUSG00000004815	1725.61	0.587674	0.0876885	6.70184	2.06e-11	4.26e-09	Dgkq	5	108794559	108817538	-1	diacylglycerol kinase, theta [Source:MGI Symbol;Acc:MGI:102918]	5.70268e-09
ENSMUSG00000018379	2876.5	0.429076	0.0641243	6.69132	2.21e-11	4.52e-09	Srsf1	11	87938199	87944581	1	serine and arginine-rich splicing factor 1 [Source:MGI Symbol;Acc:MGI:98283]	6.03847e-09
ENSMUSG00000086825	196.451	1.52651	0.228226	6.68858	2.25e-11	4.55e-09	Gm15675	1	130357518	130364928	-1	predicted gene 15675 [Source:MGI Symbol;Acc:MGI:3783117]	6.06894e-09
ENSMUSG00000028245	1174.68	0.590423	0.0884189	6.67757	2.43e-11	4.84e-09	Nsmaf	4	6396207	6454271	-1	neutral sphingomyelinase (N-SMase) activation associated factor [Source:MGI Symbol;Acc:MGI:1341864]	6.47149e-09
ENSMUSG00000059540	1091.47	0.598468	0.0900702	6.64446	3.04e-11	5.99e-09	Tcea2	2	181322103	181329864	1	transcription elongation factor A (SII), 2 [Source:MGI Symbol;Acc:MGI:107368]	7.99482e-09
ENSMUSG00000022602	472.724	1.06146	0.159861	6.6399	3.14e-11	6.1e-09	Arc	15	74540932	74544419	-1	activity regulated cytoskeletal-associated protein [Source:MGI Symbol;Acc:MGI:88067]	8.15586e-09
ENSMUSG00000015377	839.459	0.827926	0.125147	6.61565	3.7e-11	7.1e-09	Dennd6b	15	89066416	89080699	-1	DENN/MADD domain containing 6B [Source:MGI Symbol;Acc:MGI:1916690]	9.49321e-09
ENSMUSG00000029036	677.47	0.690018	0.104692	6.59096	4.37e-11	8.29e-09	Atad3a	4	155825098	155845550	-1	ATPase family, AAA domain containing 3A [Source:MGI Symbol;Acc:MGI:1919214]	1.10772e-08
ENSMUSG00000022185	2563.71	0.597318	0.0906937	6.5861	4.52e-11	8.46e-09	Acin1	14	54879618	54924388	-1	apoptotic chromatin condensation inducer 1 [Source:MGI Symbol;Acc:MGI:1891824]	1.1321e-08
ENSMUSG00000023952	1497.29	0.679904	0.103876	6.54532	5.94e-11	1.1e-08	Gtpbp2	17	46471958	46480296	1	GTP binding protein 2 [Source:MGI Symbol;Acc:MGI:1860138]	1.47025e-08
ENSMUSG00000022893	633.761	0.571965	0.0876142	6.52823	6.66e-11	1.22e-08	Adamts1	16	85590715	85600001	-1	a disintegrin-like and metallopeptidase (reprolysin type) with thrombospondin type 1 motif, 1 [Source:MGI Symbol;Acc:MGI:109249]	1.6293e-08
ENSMUSG00000024940	3940.46	0.615926	0.0944473	6.52138	6.97e-11	1.26e-08	Ltbp3	19	5790932	5808560	1	latent transforming growth factor beta binding protein 3 [Source:MGI Symbol;Acc:MGI:1101355]	1.68554e-08
ENSMUSG00000006307	1103.7	0.659074	0.10166	6.4831	8.99e-11	1.61e-08	Kmt2b	7	30268283	30288151	-1	lysine (K)-specific methyltransferase 2B [Source:MGI Symbol;Acc:MGI:109565]	2.14933e-08
ENSMUSG00000020205	816.983	0.87304	0.135045	6.4648	1.01e-10	1.79e-08	Phlda1	10	111342147	111344506	1	pleckstrin homology like domain, family A, member 1 [Source:MGI Symbol;Acc:MGI:1096880]	2.38757e-08
ENSMUSG00000036552	349.527	0.755987	0.117357	6.44179	1.18e-10	2.06e-08	Ermard	17	15261470	15310306	1	ER membrane associated RNA degradation [Source:MGI Symbol;Acc:MGI:1917317]	2.75845e-08
ENSMUSG00000072235	114239	-0.213727	0.033299	-6.41843	1.38e-10	2.38e-08	Tuba1a	15	98847718	98851584	-1	tubulin, alpha 1A [Source:MGI Symbol;Acc:MGI:98869]	3.19053e-08
ENSMUSG00000022114	708.888	0.661907	0.103171	6.4156	1.4e-10	2.4e-08	Spry2	14	106129381	106134253	-1	sprouty RTK signaling antagonist 2 [Source:MGI Symbol;Acc:MGI:1345138]	3.20159e-08
ENSMUSG00000030231	1321.49	0.77812	0.121884	6.3841	1.72e-10	2.92e-08	Plekha5	6	140369780	140542836	1	pleckstrin homology domain containing, family A member 5 [Source:MGI Symbol;Acc:MGI:1923802]	3.89108e-08
ENSMUSG00000020889	618.655	0.616624	0.096719	6.37542	1.82e-10	3.06e-08	Nr1d1	11	98658758	98666159	-1	nuclear receptor subfamily 1, group D, member 1 [Source:MGI Symbol;Acc:MGI:2444210]	4.07351e-08
ENSMUSG00000033253	916.205	0.760494	0.119443	6.36702	1.93e-10	3.19e-08	Szt2	4	118219940	118266470	-1	SZT2 subunit of KICSTOR complex [Source:MGI Symbol;Acc:MGI:3033336]	4.27424e-08
ENSMUSG00000014668	749.904	0.729254	0.114952	6.34398	2.24e-10	3.67e-08	Chfr	5	110283708	110319838	1	checkpoint with forkhead and ring finger domains [Source:MGI Symbol;Acc:MGI:2444898]	4.9091e-08
ENSMUSG00000071637	609.338	0.655849	0.103592	6.33107	2.43e-10	3.95e-08	Cebpd	16	15705150	15708895	1	CCAAT/enhancer binding protein (C/EBP), delta [Source:MGI Symbol;Acc:MGI:103573]	5.27059e-08
ENSMUSG00000000823	1145.41	0.843412	0.133572	6.31431	2.71e-10	4.36e-08	Zfp512b	2	181223896	181234596	-1	zinc finger protein 512B [Source:MGI Symbol;Acc:MGI:2685478]	5.81793e-08
ENSMUSG00000021134	4067.21	0.385532	0.0612699	6.29236	3.13e-10	4.97e-08	Srsf5	12	80992278	80997281	1	serine and arginine-rich splicing factor 5 [Source:MGI Symbol;Acc:MGI:98287]	6.65172e-08
ENSMUSG00000021127	575.783	0.613677	0.0976596	6.28384	3.3e-10	5.16e-08	Zfp36l1	12	80154528	80159787	-1	zinc finger protein 36, C3H type-like 1 [Source:MGI Symbol;Acc:MGI:107946]	6.89496e-08
ENSMUSG00000093452	48.5027	2.87258	0.457159	6.28355	3.31e-10	5.16e-08	Zfhx2os	14	55291326	55313330	1	zinc finger homeobox 2, opposite strand [Source:MGI Symbol;Acc:MGI:3620246]	6.89496e-08
ENSMUSG00000027677	1264.61	0.766276	0.122501	6.25527	3.97e-10	6.12e-08	Ttc14	3	33853981	33869009	1	tetratricopeptide repeat domain 14 [Source:MGI Symbol;Acc:MGI:1914370]	8.18871e-08
ENSMUSG00000000948	371.444	0.776786	0.12436	6.24627	4.2e-10	6.42e-08	Gm38393	7	59623897	59654812	-1	predicted gene, 38393 [Source:MGI Symbol;Acc:MGI:5613898]	8.57901e-08
ENSMUSG00000109122	38.4183	2.62657	0.420697	6.24338	4.28e-10	6.48e-08	A230103L15Rik	7	58977066	58980937	-1	RIKEN cDNA A230103L15 gene [Source:MGI Symbol;Acc:MGI:1925005]	8.65836e-08
ENSMUSG00000037808	270.651	0.843391	0.135499	6.22432	4.84e-10	7.25e-08	Fam76b	9	13739012	13766283	1	family with sequence similarity 76, member B [Source:MGI Symbol;Acc:MGI:1920076]	9.69798e-08
ENSMUSG00000027620	3123.4	0.361849	0.0584039	6.19564	5.8e-10	8.62e-08	Rbm39	2	155989159	156022158	-1	RNA binding motif protein 39 [Source:MGI Symbol;Acc:MGI:2157953]	1.15119e-07
ENSMUSG00000036046	2738.35	0.497321	0.0804986	6.17801	6.49e-10	9.55e-08	5031439G07Rik	15	84828137	84872752	-1	RIKEN cDNA 5031439G07 gene [Source:MGI Symbol;Acc:MGI:2444899]	1.2761e-07
ENSMUSG00000028782	740.943	0.545631	0.0884062	6.17186	6.75e-10	9.79e-08	Adgrb2	4	129878663	129916426	1	adhesion G protein-coupled receptor B2 [Source:MGI Symbol;Acc:MGI:2451244]	1.30866e-07
ENSMUSG00000023034	3368.79	1.99708	0.323617	6.17112	6.78e-10	9.79e-08	Nr4a1	15	101152150	101172676	1	nuclear receptor subfamily 4, group A, member 1 [Source:MGI Symbol;Acc:MGI:1352454]	1.30866e-07
ENSMUSG00000027332	902.281	0.589166	0.0957005	6.15636	7.44e-10	1.07e-07	Ivd	2	118692435	118713390	1	isovaleryl coenzyme A dehydrogenase [Source:MGI Symbol;Acc:MGI:1929242]	1.423e-07
ENSMUSG00000082286	593.964	1.20583	0.196036	6.15105	7.7e-10	1.09e-07	Pisd-ps1	11	3075904	3081004	1	phosphatidylserine decarboxylase, pseudogene 1 [Source:MGI Symbol;Acc:MGI:3842428]	1.45946e-07
ENSMUSG00000039630	6235.7	0.405087	0.0659298	6.14421	8.04e-10	1.13e-07	Hnrnpu	1	178148673	178165362	-1	heterogeneous nuclear ribonucleoprotein U [Source:MGI Symbol;Acc:MGI:1858195]	1.5103e-07
ENSMUSG00000015165	2727.91	0.464397	0.0756505	6.13871	8.32e-10	1.16e-07	Hnrnpl	7	28507966	28521691	1	heterogeneous nuclear ribonucleoprotein L [Source:MGI Symbol;Acc:MGI:104816]	1.54907e-07
ENSMUSG00000055436	1739.12	0.652667	0.106409	6.13357	8.59e-10	1.19e-07	Srsf11	3	157716110	157742276	-1	serine and arginine-rich splicing factor 11 [Source:MGI Symbol;Acc:MGI:1916457]	1.58531e-07
ENSMUSG00000017774	981.544	0.572394	0.0938507	6.09898	1.07e-09	1.46e-07	Myo1c	11	75541330	75564736	1	myosin IC [Source:MGI Symbol;Acc:MGI:106612]	1.95754e-07
ENSMUSG00000023191	235.249	1.12027	0.183839	6.09378	1.1e-09	1.49e-07	P3h3	6	124818052	124834715	-1	prolyl 3-hydroxylase 3 [Source:MGI Symbol;Acc:MGI:1315208]	1.99508e-07
ENSMUSG00000000579	112.811	1.73741	0.285145	6.09305	1.11e-09	1.49e-07	Dynlt1c	17	6869070	6877173	1	dynein light chain Tctex-type 1C [Source:MGI Symbol;Acc:MGI:3807476]	1.99601e-07
ENSMUSG00000002625	1537.42	0.770813	0.126622	6.0875	1.15e-09	1.53e-07	Akap8l	17	32540398	32569581	-1	A kinase (PRKA) anchor protein 8-like [Source:MGI Symbol;Acc:MGI:1860606]	2.05041e-07
ENSMUSG00000024843	2101.12	0.474906	0.0780818	6.08215	1.19e-09	1.57e-07	Chka	19	3901773	3944369	1	choline kinase alpha [Source:MGI Symbol;Acc:MGI:107760]	2.1039e-07
ENSMUSG00000100642	105.739	1.51081	0.250542	6.03015	1.64e-09	2.15e-07	Gm28230	2	74557072	74578262	1	predicted gene 28230 [Source:MGI Symbol;Acc:MGI:5578936]	2.86895e-07
ENSMUSG00000030669	32337.1	-0.381292	0.0632449	-6.02881	1.65e-09	2.15e-07	Calca	7	114230713	114235592	-1	calcitonin/calcitonin-related polypeptide, alpha [Source:MGI Symbol;Acc:MGI:2151253]	2.86895e-07
ENSMUSG00000022515	668.759	0.519002	0.0864379	6.00433	1.92e-09	2.48e-07	Anks3	16	4759300	4782069	-1	ankyrin repeat and sterile alpha motif domain containing 3 [Source:MGI Symbol;Acc:MGI:1919865]	3.31106e-07
ENSMUSG00000029714	1098.99	0.716656	0.119448	5.99973	1.98e-09	2.53e-07	Gigyf1	5	137516810	137526197	1	GRB10 interacting GYF protein 1 [Source:MGI Symbol;Acc:MGI:1888677]	3.38677e-07
ENSMUSG00000010086	3511.03	0.610463	0.10184	5.99435	2.04e-09	2.58e-07	Rnf112	11	61339268	61344957	-1	ring finger protein 112 [Source:MGI Symbol;Acc:MGI:106611]	3.4504e-07
ENSMUSG00000033597	7669.73	0.419903	0.0700567	5.99376	2.05e-09	2.58e-07	Caskin1	17	24707575	24727645	1	CASK interacting protein 1 [Source:MGI Symbol;Acc:MGI:2442952]	3.4504e-07
ENSMUSG00000035206	972.968	0.498419	0.0834368	5.97362	2.32e-09	2.9e-07	Sppl2b	10	80691109	80704542	1	signal peptide peptidase like 2B [Source:MGI Symbol;Acc:MGI:1920468]	3.87385e-07
ENSMUSG00000046613	1662.65	0.470004	0.0787442	5.96874	2.39e-09	2.96e-07	Vwa5b2	16	20408221	20424127	1	von Willebrand factor A domain containing 5B2 [Source:MGI Symbol;Acc:MGI:2681859]	3.95931e-07
ENSMUSG00000057378	454.754	0.774858	0.129989	5.96095	2.51e-09	3.08e-07	Ryr3	2	112461700	113047441	-1	ryanodine receptor 3 [Source:MGI Symbol;Acc:MGI:99684]	4.12562e-07
ENSMUSG00000030342	13081.4	-0.371866	0.062469	-5.95281	2.64e-09	3.22e-07	Cd9	6	125437229	125471754	-1	CD9 antigen [Source:MGI Symbol;Acc:MGI:88348]	4.30566e-07
ENSMUSG00000037364	2352.01	0.726662	0.122279	5.94268	2.8e-09	3.39e-07	Srrt	5	137293966	137305936	-1	serrate RNA effector molecule homolog (Arabidopsis) [Source:MGI Symbol;Acc:MGI:1933527]	4.53148e-07
ENSMUSG00000041328	571.318	0.691058	0.116622	5.92565	3.11e-09	3.74e-07	Pcf11	7	92292751	92319142	-1	PCF11 cleavage and polyadenylation factor subunit [Source:MGI Symbol;Acc:MGI:1919579]	4.99475e-07
ENSMUSG00000029512	2767.7	0.324928	0.0549197	5.91642	3.29e-09	3.92e-07	Ulk1	5	110932354	110957963	-1	unc-51 like kinase 1 [Source:MGI Symbol;Acc:MGI:1270126]	5.24381e-07
ENSMUSG00000005682	591.104	0.746218	0.12767	5.84491	5.07e-09	6e-07	Pan2	10	128139204	128157227	1	PAN2 poly(A) specific ribonuclease subunit [Source:MGI Symbol;Acc:MGI:1918984]	8.02013e-07
ENSMUSG00000020385	709.295	1.03953	0.17793	5.84239	5.15e-09	6.01e-07	Clk4	11	51152557	51172593	1	CDC like kinase 4 [Source:MGI Symbol;Acc:MGI:1098551]	8.02885e-07
ENSMUSG00000107000	38.6033	2.25381	0.385847	5.84121	5.18e-09	6.01e-07	Gm43481	5	134295919	134299590	-1	predicted gene 43481 [Source:MGI Symbol;Acc:MGI:5663618]	8.02885e-07
ENSMUSG00000024299	225.401	1.66858	0.285675	5.84083	5.19e-09	6.01e-07	Adamts10	17	33743178	33772756	1	a disintegrin-like and metallopeptidase (reprolysin type) with thrombospondin type 1 motif, 10 [Source:MGI Symbol;Acc:MGI:2449112]	8.02885e-07
ENSMUSG00000034022	1038.49	0.508073	0.0870805	5.83452	5.39e-09	6.2e-07	Cpsf1	15	76480003	76491791	-1	cleavage and polyadenylation specific factor 1 [Source:MGI Symbol;Acc:MGI:2679722]	8.27739e-07
ENSMUSG00000034771	361.346	1.00752	0.172873	5.8281	5.61e-09	6.39e-07	Tle2	10	81410395	81426679	1	transducin-like enhancer of split 2 [Source:MGI Symbol;Acc:MGI:104635]	8.55281e-07
ENSMUSG00000104362	220.686	0.968441	0.166475	5.81734	5.98e-09	6.77e-07	Gm37928	3	118324532	118328662	1	predicted gene, 37928 [Source:MGI Symbol;Acc:MGI:5611156]	9.05131e-07
ENSMUSG00000028957	202.925	1.09264	0.188181	5.80631	6.39e-09	7.18e-07	Per3	4	151088109	151129122	-1	period circadian clock 3 [Source:MGI Symbol;Acc:MGI:1277134]	9.6028e-07
ENSMUSG00000025145	677.699	1.07138	0.185132	5.7871	7.16e-09	7.99e-07	Lrrc45	11	120604751	120611954	1	leucine rich repeat containing 45 [Source:MGI Symbol;Acc:MGI:2387183]	1.06836e-06
ENSMUSG00000101609	219.488	1.17278	0.202811	5.7826	7.36e-09	8.1e-07	Kcnq1ot1	7	142757195	142850286	-1	KCNQ1 overlapping transcript 1 [Source:MGI Symbol;Acc:MGI:1926855]	1.08285e-06
ENSMUSG00000014782	59.4516	2.36161	0.408406	5.78251	7.36e-09	8.1e-07	Plekhg4	8	106099906	106109494	1	pleckstrin homology domain containing, family G (with RhoGef domain) member 4 [Source:MGI Symbol;Acc:MGI:2142544]	1.08285e-06
ENSMUSG00000028820	2934.94	0.381598	0.0661251	5.77085	7.89e-09	8.53e-07	Sfpq	4	126915117	126930806	1	splicing factor proline/glutamine rich (polypyrimidine tract binding protein associated) [Source:MGI Symbol;Acc:MGI:1918764]	1.13985e-06
ENSMUSG00000039233	851.468	0.547224	0.094827	5.77076	7.89e-09	8.53e-07	Tbce	13	14172534	14214223	-1	tubulin-specific chaperone E [Source:MGI Symbol;Acc:MGI:1917680]	1.13985e-06
ENSMUSG00000041075	447.211	0.725679	0.12576	5.77033	7.91e-09	8.53e-07	Fzd7	1	59521583	59526114	1	frizzled class receptor 7 [Source:MGI Symbol;Acc:MGI:108570]	1.13985e-06
ENSMUSG00000054387	1006.5	0.680061	0.118337	5.74682	9.09e-09	9.72e-07	Mdm4	1	132887222	132958299	-1	transformed mouse 3T3 cell double minute 4 [Source:MGI Symbol;Acc:MGI:107934]	1.2993e-06
ENSMUSG00000084904	50.5632	2.24945	0.391485	5.74594	9.14e-09	9.72e-07	Gm14827	X	93486338	93491333	1	predicted gene 14827 [Source:MGI Symbol;Acc:MGI:3705192]	1.2993e-06
ENSMUSG00000059851	353.625	1.07877	0.18857	5.72079	1.06e-08	1.12e-06	Kmt5c	7	4743114	4750513	1	lysine methyltransferase 5C [Source:MGI Symbol;Acc:MGI:2385262]	1.49673e-06
ENSMUSG00000006576	1062.4	0.929	0.16243	5.71939	1.07e-08	1.12e-06	Slc4a3	1	75522910	75538816	1	solute carrier family 4 (anion exchanger), member 3 [Source:MGI Symbol;Acc:MGI:109350]	1.50078e-06
ENSMUSG00000028572	229.432	1.2435	0.217718	5.71148	1.12e-08	1.17e-06	Hook1	4	95855477	95913650	1	hook microtubule tethering protein 1 [Source:MGI Symbol;Acc:MGI:1925213]	1.56051e-06
ENSMUSG00000032637	3364.46	0.59816	0.104793	5.70804	1.14e-08	1.18e-06	Atxn2l	7	126090880	126102609	-1	ataxin 2-like [Source:MGI Symbol;Acc:MGI:2446242]	1.57793e-06
ENSMUSG00000043411	2563.26	0.476942	0.0836307	5.70295	1.18e-08	1.21e-06	Usp48	4	137321066	137385848	1	ubiquitin specific peptidase 48 [Source:MGI Symbol;Acc:MGI:2158502]	1.62262e-06
ENSMUSG00000069049	727.043	0.505308	0.0886626	5.69923	1.2e-08	1.23e-06	Eif2s3y	Y	1010543	1028847	1	eukaryotic translation initiation factor 2, subunit 3, structural gene Y-linked [Source:MGI Symbol;Acc:MGI:1349430]	1.6394e-06
ENSMUSG00000029647	538.386	0.712169	0.125	5.69736	1.22e-08	1.24e-06	Pan3	5	147366971	147485312	1	PAN3 poly(A) specific ribonuclease subunit [Source:MGI Symbol;Acc:MGI:1919837]	1.65597e-06
ENSMUSG00000029027	79.7197	1.71096	0.300415	5.69533	1.23e-08	1.24e-06	Dffb	4	154048906	154059583	-1	DNA fragmentation factor, beta subunit [Source:MGI Symbol;Acc:MGI:1196287]	1.65884e-06
ENSMUSG00000059208	2832.04	0.495152	0.0871576	5.68111	1.34e-08	1.34e-06	Hnrnpm	17	33865207	33905834	-1	heterogeneous nuclear ribonucleoprotein M [Source:MGI Symbol;Acc:MGI:1926465]	1.79569e-06
ENSMUSG00000023764	321.096	0.96444	0.16989	5.67685	1.37e-08	1.37e-06	Sfi1	11	3081850	3143463	-1	Sfi1 homolog, spindle assembly associated (yeast) [Source:MGI Symbol;Acc:MGI:1926137]	1.82427e-06
ENSMUSG00000026927	1160.86	0.657977	0.116605	5.6428	1.67e-08	1.66e-06	Entr1	2	26272814	26279328	-1	endosome associated trafficking regulator 1 [Source:MGI Symbol;Acc:MGI:1915362]	2.20976e-06
ENSMUSG00000054708	981.206	0.673614	0.119959	5.61536	1.96e-08	1.93e-06	Ankrd24	10	81464374	81483444	1	ankyrin repeat domain 24 [Source:MGI Symbol;Acc:MGI:1890394]	2.57728e-06
ENSMUSG00000004980	6071.5	0.45101	0.0803349	5.61413	1.98e-08	1.93e-06	Hnrnpa2b1	6	51437912	51446874	-1	heterogeneous nuclear ribonucleoprotein A2/B1 [Source:MGI Symbol;Acc:MGI:104819]	2.5874e-06
ENSMUSG00000033335	1572.34	0.602646	0.107669	5.59718	2.18e-08	2.12e-06	Dnm2	9	21336204	21419055	1	dynamin 2 [Source:MGI Symbol;Acc:MGI:109547]	2.83117e-06
ENSMUSG00000024943	772.914	0.814875	0.145752	5.59085	2.26e-08	2.18e-06	Smc5	19	23183815	23251261	-1	structural maintenance of chromosomes 5 [Source:MGI Symbol;Acc:MGI:2385088]	2.91706e-06
ENSMUSG00000094410	672.395	0.580068	0.103969	5.57922	2.42e-08	2.32e-06	Gm38394	1	133547678	133589056	-1	predicted gene, 38394 [Source:MGI Symbol;Acc:MGI:5614057]	3.10454e-06
ENSMUSG00000022961	7176.21	0.344379	0.0618216	5.57052	2.54e-08	2.42e-06	Son	16	91444394	91476109	1	Son DNA binding protein [Source:MGI Symbol;Acc:MGI:98353]	3.23873e-06
ENSMUSG00000032515	321.726	0.887701	0.159396	5.56914	2.56e-08	2.43e-06	Csrnp1	9	119800229	119813724	-1	cysteine-serine-rich nuclear protein 1 [Source:MGI Symbol;Acc:MGI:2387989]	3.24457e-06
ENSMUSG00000057110	209.18	1.22432	0.219968	5.5659	2.61e-08	2.46e-06	Cntrl	2	34999504	35068834	1	centriolin [Source:MGI Symbol;Acc:MGI:1889576]	3.28813e-06
ENSMUSG00000053141	4778.06	-0.419388	0.0753996	-5.5622	2.66e-08	2.48e-06	Ptprt	2	161363910	162503067	-1	protein tyrosine phosphatase, receptor type, T [Source:MGI Symbol;Acc:MGI:1321152]	3.32391e-06
ENSMUSG00000031328	2710.46	1.3718	0.246641	5.56192	2.67e-08	2.48e-06	Flna	X	73267067	73293426	-1	filamin, alpha [Source:MGI Symbol;Acc:MGI:95556]	3.32391e-06
ENSMUSG00000029701	822.139	0.585188	0.105733	5.53459	3.12e-08	2.89e-06	Rbm28	6	29123575	29165005	-1	RNA binding motif protein 28 [Source:MGI Symbol;Acc:MGI:2655711]	3.86128e-06
ENSMUSG00000030103	1134.17	1.34179	0.242842	5.52537	3.29e-08	3.02e-06	Bhlhe40	6	108637590	108643886	1	basic helix-loop-helix family, member e40 [Source:MGI Symbol;Acc:MGI:1097714]	4.03655e-06
ENSMUSG00000102302	30.2714	2.47875	0.44865	5.5249	3.3e-08	3.02e-06	Gm38190	1	165057940	165062694	-1	predicted gene, 38190 [Source:MGI Symbol;Acc:MGI:5611418]	4.03655e-06
ENSMUSG00000055629	891.76	0.479252	0.0868216	5.51997	3.39e-08	3.08e-06	B4galnt4	7	140641017	140652313	1	beta-1,4-N-acetyl-galactosaminyl transferase 4 [Source:MGI Symbol;Acc:MGI:2652891]	4.12267e-06
ENSMUSG00000027582	785.167	0.662256	0.12026	5.50687	3.65e-08	3.3e-06	Zgpat	2	181006721	181025421	1	zinc finger, CCCH-type with G patch domain [Source:MGI Symbol;Acc:MGI:2449939]	4.41335e-06
ENSMUSG00000026632	201.803	0.836023	0.152205	5.49274	3.96e-08	3.56e-06	Tatdn3	1	190778023	190795129	-1	TatD DNase domain containing 3 [Source:MGI Symbol;Acc:MGI:1916222]	4.76083e-06
ENSMUSG00000109378	92.9336	1.55862	0.28392	5.48963	4.03e-08	3.6e-06	Gm49396	7	30262769	30267385	1	predicted gene, 49396 [Source:MGI Symbol;Acc:MGI:6121629]	4.81745e-06
ENSMUSG00000028849	12082.5	0.318538	0.0582667	5.46688	4.58e-08	4.07e-06	Map7d1	4	126125960	126150136	-1	MAP7 domain containing 1 [Source:MGI Symbol;Acc:MGI:2384297]	5.44399e-06
ENSMUSG00000025515	52.096	1.64443	0.300917	5.46472	4.64e-08	4.09e-06	Muc2	7	141276583	141308430	1	mucin 2 [Source:MGI Symbol;Acc:MGI:1339364]	5.46544e-06
ENSMUSG00000006676	5345.48	0.421705	0.0771774	5.46409	4.65e-08	4.09e-06	Usp19	9	108367801	108379536	1	ubiquitin specific peptidase 19 [Source:MGI Symbol;Acc:MGI:1918722]	5.46544e-06
ENSMUSG00000026790	1072.25	0.520597	0.0953096	5.46217	4.7e-08	4.09e-06	Odf2	2	29779233	29821758	1	outer dense fiber of sperm tails 2 [Source:MGI Symbol;Acc:MGI:1098824]	5.47479e-06
ENSMUSG00000029208	547.238	0.652428	0.119447	5.46206	4.71e-08	4.09e-06	Guf1	5	69714266	69733316	1	GUF1 homolog, GTPase [Source:MGI Symbol;Acc:MGI:2140726]	5.47479e-06
ENSMUSG00000027668	2016.8	0.529859	0.0970866	5.45759	4.83e-08	4.17e-06	Mfn1	3	32583614	32633388	1	mitofusin 1 [Source:MGI Symbol;Acc:MGI:1914664]	5.58343e-06
ENSMUSG00000032449	1943.25	0.370778	0.0679629	5.45559	4.88e-08	4.2e-06	Slc25a36	9	96957014	96993210	-1	solute carrier family 25, member 36 [Source:MGI Symbol;Acc:MGI:1924909]	5.6104e-06
ENSMUSG00000018476	912.194	0.658304	0.120783	5.45031	5.03e-08	4.3e-06	Kdm6b	11	69289334	69304501	-1	KDM1 lysine (K)-specific demethylase 6B [Source:MGI Symbol;Acc:MGI:2448492]	5.75142e-06
ENSMUSG00000024276	1039.54	0.452028	0.0830761	5.44114	5.29e-08	4.5e-06	Zfp397	18	24087749	24097730	1	zinc finger protein 397 [Source:MGI Symbol;Acc:MGI:1916506]	6.01602e-06
ENSMUSG00000020893	1060.75	0.656032	0.120687	5.43581	5.45e-08	4.62e-06	Per1	11	68986043	69000786	1	period circadian clock 1 [Source:MGI Symbol;Acc:MGI:1098283]	6.16465e-06
ENSMUSG00000039218	10143	1.51527	0.278869	5.43361	5.52e-08	4.64e-06	Srrm2	17	24009506	24043715	1	serine/arginine repetitive matrix 2 [Source:MGI Symbol;Acc:MGI:1923206]	6.19979e-06
ENSMUSG00002076083	1129.48	0.608506	0.112004	5.43291	5.54e-08	4.64e-06	Klhl17	4	156313792	156319314	-1	kelch-like 17 [Source:NCBI gene (formerly Entrezgene);Acc:231003]	6.19979e-06
ENSMUSG00000030091	164.567	1.0624	0.196039	5.41929	5.98e-08	4.98e-06	Nup210	6	90990050	91093811	-1	nucleoporin 210 [Source:MGI Symbol;Acc:MGI:1859555]	6.65678e-06
ENSMUSG00000075590	4236.6	0.511996	0.0946628	5.40863	6.35e-08	5.26e-06	Nrbp2	15	75957367	75963476	-1	nuclear receptor binding protein 2 [Source:MGI Symbol;Acc:MGI:2385017]	7.03146e-06
ENSMUSG00000021098	205.619	0.98313	0.182089	5.39918	6.69e-08	5.52e-06	4930447C04Rik	12	72927883	72987548	-1	RIKEN cDNA 4930447C04 gene [Source:MGI Symbol;Acc:MGI:1923051]	7.36916e-06
ENSMUSG00000037552	441.532	0.916623	0.169974	5.39271	6.94e-08	5.69e-06	Plekhg2	7	28059029	28072024	-1	pleckstrin homology domain containing, family G (with RhoGef domain) member 2 [Source:MGI Symbol;Acc:MGI:2141874]	7.60472e-06
ENSMUSG00000041936	2424.24	1.50799	0.27998	5.38608	7.2e-08	5.87e-06	Agrn	4	156249747	156281945	-1	agrin [Source:MGI Symbol;Acc:MGI:87961]	7.84875e-06
ENSMUSG00000053964	66.2536	1.71269	0.318213	5.38222	7.36e-08	5.97e-06	Lgals4	7	28533279	28541133	1	lectin, galactose binding, soluble 4 [Source:MGI Symbol;Acc:MGI:107536]	7.98181e-06
ENSMUSG00000030374	1350.98	0.363231	0.0675939	5.37373	7.71e-08	6.23e-06	Strn4	7	16549814	16574856	1	striatin, calmodulin binding protein 4 [Source:MGI Symbol;Acc:MGI:2142346]	8.3185e-06
ENSMUSG00000018861	373.673	0.770681	0.143934	5.35442	8.58e-08	6.89e-06	Fdxr	11	115158850	115167876	-1	ferredoxin reductase [Source:MGI Symbol;Acc:MGI:104724]	9.20993e-06
ENSMUSG00000058740	5599.75	0.577313	0.107856	5.35264	8.67e-08	6.93e-06	Kcnt1	2	25753746	25808285	1	potassium channel, subfamily T, member 1 [Source:MGI Symbol;Acc:MGI:1924627]	9.2593e-06
ENSMUSG00000041354	750.22	0.955034	0.178651	5.34581	9e-08	7.16e-06	Rgl2	17	34148517	34156661	1	ral guanine nucleotide dissociation stimulator-like 2 [Source:MGI Symbol;Acc:MGI:107483]	9.56318e-06
ENSMUSG00000029135	500.121	0.560587	0.105241	5.3267	1e-07	7.91e-06	Fosl2	5	32293145	32315186	1	fos-like antigen 2 [Source:MGI Symbol;Acc:MGI:102858]	1.05195e-05
ENSMUSG00000024335	5207.22	0.298782	0.0560999	5.32588	1e-07	7.91e-06	Brd2	17	34330997	34341608	-1	bromodomain containing 2 [Source:MGI Symbol;Acc:MGI:99495]	1.05195e-05
ENSMUSG00000035597	520.442	0.755925	0.14209	5.32006	1.04e-07	8.12e-06	Prpf39	12	65083107	65110160	1	pre-mRNA processing factor 39 [Source:MGI Symbol;Acc:MGI:104602]	1.08859e-05
ENSMUSG00000010608	2537.8	0.352275	0.0663224	5.31156	1.09e-07	8.47e-06	Rbm25	12	83678010	83729897	1	RNA binding motif protein 25 [Source:MGI Symbol;Acc:MGI:1914289]	1.13527e-05
ENSMUSG00000026064	57.4728	2.12863	0.401136	5.3065	1.12e-07	8.66e-06	Ptp4a1	1	30979383	30988390	-1	protein tyrosine phosphatase 4a1 [Source:MGI Symbol;Acc:MGI:1277096]	1.16077e-05
ENSMUSG00000032621	970.021	0.728214	0.137316	5.3032	1.14e-07	8.78e-06	Srek1	13	103875856	103911116	-1	splicing regulatory glutamine/lysine-rich protein 1 [Source:MGI Symbol;Acc:MGI:2145245]	1.17571e-05
ENSMUSG00000105340	137.651	1.25945	0.238131	5.28891	1.23e-07	9.45e-06	Gm42878	5	121656676	121683545	-1	predicted gene 42878 [Source:MGI Symbol;Acc:MGI:5663015]	1.26234e-05
ENSMUSG00000061589	597.023	0.98645	0.186738	5.28255	1.27e-07	9.73e-06	Dot1l	10	80591040	80631295	1	DOT1-like, histone H3 methyltransferase (S. cerevisiae) [Source:MGI Symbol;Acc:MGI:2143886]	1.29706e-05
ENSMUSG00000026349	1535.21	0.402804	0.076306	5.2788	1.3e-07	9.89e-06	Ccnt2	1	127701901	127735798	1	cyclin T2 [Source:MGI Symbol;Acc:MGI:1920199]	1.32129e-05
ENSMUSG00000102602	36.6499	2.0837	0.395202	5.27249	1.35e-07	1.02e-05	A930004J17Rik	4	131605939	131610548	1	RIKEN cDNA A930004J17 gene [Source:MGI Symbol;Acc:MGI:2442442]	1.36551e-05
ENSMUSG00000019467	3721.21	0.297948	0.0566432	5.26008	1.44e-07	1.08e-05	Arhgef25	10	127018394	127025952	-1	Rho guanine nucleotide exchange factor (GEF) 25 [Source:MGI Symbol;Acc:MGI:1277173]	1.44958e-05
ENSMUSG00000028180	3294.61	0.298787	0.0568106	5.25935	1.45e-07	1.08e-05	Zranb2	3	157239797	157254047	1	zinc finger, RAN-binding domain containing 2 [Source:MGI Symbol;Acc:MGI:1858211]	1.45269e-05
ENSMUSG00000095123	80.6763	1.8421	0.350635	5.25361	1.49e-07	1.11e-05	Gm21781	10	4341587	4346424	1	predicted gene, 21781 [Source:MGI Symbol;Acc:MGI:5433945]	1.48569e-05
ENSMUSG00000008200	740.394	0.608822	0.115947	5.25087	1.51e-07	1.12e-05	Fnbp4	2	90575714	90611365	1	formin binding protein 4 [Source:MGI Symbol;Acc:MGI:1860513]	1.49853e-05
ENSMUSG00000035649	463.127	0.718404	0.137239	5.23471	1.65e-07	1.22e-05	Zcchc7	4	44755877	44932215	1	zinc finger, CCHC domain containing 7 [Source:MGI Symbol;Acc:MGI:2442912]	1.62978e-05
ENSMUSG00000006498	611.579	0.754731	0.145306	5.19408	2.06e-07	1.51e-05	Ptbp1	10	79690261	79700605	1	polypyrimidine tract binding protein 1 [Source:MGI Symbol;Acc:MGI:97791]	2.02525e-05
ENSMUSG00000095567	948.701	0.530278	0.102145	5.19145	2.09e-07	1.53e-05	Noc2l	4	156320376	156332073	1	NOC2 like nucleolar associated transcriptional repressor [Source:MGI Symbol;Acc:MGI:1931051]	2.03572e-05
ENSMUSG00000031398	574.757	1.05763	0.203753	5.19077	2.09e-07	1.53e-05	Plxna3	X	73372672	73388295	1	plexin A3 [Source:MGI Symbol;Acc:MGI:107683]	2.03572e-05
ENSMUSG00000090031	46.9392	2.05791	0.396732	5.18716	2.14e-07	1.55e-05	4732440D04Rik	1	6280090	6285517	-1	RIKEN cDNA 4732440D04 gene [Source:MGI Symbol;Acc:MGI:3604103]	2.0653e-05
ENSMUSG00000023473	1447.15	0.673618	0.12988	5.18647	2.14e-07	1.55e-05	Celsr3	9	108703519	108730168	1	cadherin, EGF LAG seven-pass G-type receptor 3 [Source:MGI Symbol;Acc:MGI:1858236]	2.0653e-05
ENSMUSG00000031442	2429.79	0.449306	0.0867084	5.18181	2.2e-07	1.58e-05	Mcf2l	8	12923806	13070905	1	mcf.2 transforming sequence-like [Source:MGI Symbol;Acc:MGI:103263]	2.11351e-05
ENSMUSG00000037355	253.971	0.731167	0.141182	5.1789	2.23e-07	1.6e-05	Uvssa	5	33535893	33577098	1	UV stimulated scaffold protein A [Source:MGI Symbol;Acc:MGI:1918351]	2.13259e-05
ENSMUSG00000034681	2179.93	0.352647	0.0684981	5.14827	2.63e-07	1.87e-05	Rnps1	17	24633539	24644875	1	RNA binding protein with serine rich domain 1 [Source:MGI Symbol;Acc:MGI:97960]	2.50374e-05
ENSMUSG00000020263	901.939	0.67879	0.131904	5.14608	2.66e-07	1.89e-05	Appl2	10	83435897	83484602	-1	adaptor protein, phosphotyrosine interaction, PH domain and leucine zipper containing 2 [Source:MGI Symbol;Acc:MGI:2384914]	2.52089e-05
ENSMUSG00000037266	4953.59	1.11492	0.216773	5.14327	2.7e-07	1.91e-05	Rsrp1	4	134650903	134654982	1	arginine/serine rich protein 1 [Source:MGI Symbol;Acc:MGI:106498]	2.54732e-05
ENSMUSG00000047767	286.265	1.07523	0.20928	5.13775	2.78e-07	1.95e-05	Atg16l2	7	100912241	100951458	-1	autophagy related 16-like 2 (S. cerevisiae) [Source:MGI Symbol;Acc:MGI:1920933]	2.61109e-05
ENSMUSG00000051166	472.732	0.821715	0.160487	5.12015	3.05e-07	2.14e-05	Eml5	12	98753064	98867743	-1	echinoderm microtubule associated protein like 5 [Source:MGI Symbol;Acc:MGI:2442513]	2.85195e-05
ENSMUSG00000109536	205.516	1.0221	0.199724	5.11758	3.09e-07	2.15e-05	9330162G02Rik	7	58873595	58904536	-1	RIKEN cDNA 9330162G02 gene [Source:MGI Symbol;Acc:MGI:2442217]	2.86979e-05
ENSMUSG00000055148	115.848	1.10837	0.216619	5.11667	3.11e-07	2.15e-05	Klf2	8	73072877	73075500	1	Kruppel-like factor 2 (lung) [Source:MGI Symbol;Acc:MGI:1342772]	2.86979e-05
ENSMUSG00000071054	1988.25	0.415471	0.0812	5.11663	3.11e-07	2.15e-05	Safb	17	56891825	56913294	1	scaffold attachment factor B [Source:MGI Symbol;Acc:MGI:2146974]	2.86979e-05
ENSMUSG00000037965	862.758	0.549273	0.107654	5.10222	3.36e-07	2.31e-05	Zc3h7a	16	10954456	10994257	-1	zinc finger CCCH type containing 7 A [Source:MGI Symbol;Acc:MGI:2445044]	3.08694e-05
ENSMUSG00000023951	2100.29	0.633154	0.124403	5.08953	3.59e-07	2.46e-05	Vegfa	17	46327919	46343295	-1	vascular endothelial growth factor A [Source:MGI Symbol;Acc:MGI:103178]	3.28391e-05
ENSMUSG00000022763	854.915	0.695645	0.136762	5.08652	3.65e-07	2.48e-05	Aifm3	16	17307475	17325349	1	apoptosis-inducing factor, mitochondrion-associated 3 [Source:MGI Symbol;Acc:MGI:1919418]	3.32434e-05
ENSMUSG00000069678	524.957	0.635645	0.125028	5.08401	3.7e-07	2.5e-05	Pcgf1	6	83054850	83057836	1	polycomb group ring finger 1 [Source:MGI Symbol;Acc:MGI:1917087]	3.34999e-05
ENSMUSG00000053907	3840.07	0.31977	0.0629047	5.0834	3.71e-07	2.5e-05	Mat2a	6	72409782	72416541	-1	methionine adenosyltransferase II, alpha [Source:MGI Symbol;Acc:MGI:2443731]	3.34999e-05
ENSMUSG00000098488	36.3856	2.94416	0.579795	5.07793	3.82e-07	2.57e-05	Pla2g4b	2	119863898	119873511	1	phospholipase A2, group IVB (cytosolic) [Source:MGI Symbol;Acc:MGI:2384819]	3.43457e-05
ENSMUSG00000042810	532.521	0.578295	0.113933	5.07575	3.86e-07	2.59e-05	Krba1	6	48372520	48396715	1	KRAB-A domain containing 1 [Source:MGI Symbol;Acc:MGI:1925077]	3.45577e-05
ENSMUSG00000042138	130.145	1.01467	0.200534	5.05985	4.2e-07	2.8e-05	Msantd2	9	37400317	37435921	1	Myb/SANT-like DNA-binding domain containing 2 [Source:MGI Symbol;Acc:MGI:2384579]	3.74423e-05
ENSMUSG00000110390	57.7807	1.50685	0.299027	5.03919	4.68e-07	3.1e-05	Gm45869	6	126526832	126533132	-1	predicted gene 45869 [Source:MGI Symbol;Acc:MGI:5804984]	4.15454e-05
ENSMUSG00000062785	6004.14	0.378318	0.0752002	5.03081	4.88e-07	3.23e-05	Kcnc3	7	44240088	44254178	1	potassium voltage gated channel, Shaw-related subfamily, member 3 [Source:MGI Symbol;Acc:MGI:96669]	4.31388e-05
ENSMUSG00000027284	407.913	0.820927	0.163296	5.02723	4.98e-07	3.28e-05	Cdan1	2	120546635	120680609	-1	congenital dyserythropoietic anemia, type I (human) [Source:MGI Symbol;Acc:MGI:1916218]	4.38386e-05
ENSMUSG00000022999	365.746	0.985155	0.196045	5.02515	5.03e-07	3.3e-05	Lmbr1l	15	98801798	98816112	-1	limb region 1 like [Source:MGI Symbol;Acc:MGI:1289247]	4.40942e-05
ENSMUSG00000105852	23.5953	2.63147	0.52608	5.00204	5.67e-07	3.7e-05	Gm42890	3	105866819	105891916	1	predicted gene 42890 [Source:MGI Symbol;Acc:MGI:5663027]	4.94984e-05
ENSMUSG00000053985	252.184	0.968108	0.193737	4.99702	5.82e-07	3.79e-05	Zfp14	7	29735784	29750805	-1	zinc finger protein 14 [Source:MGI Symbol;Acc:MGI:99160]	5.05979e-05
ENSMUSG00000002265	7693.37	0.250942	0.0503479	4.98416	6.22e-07	4.03e-05	Peg3	7	6706891	6733430	-1	paternally expressed 3 [Source:MGI Symbol;Acc:MGI:104748]	5.38047e-05
ENSMUSG00000052512	656.201	0.745592	0.149612	4.98351	6.24e-07	4.03e-05	Nav2	7	48558464	49259838	1	neuron navigator 2 [Source:MGI Symbol;Acc:MGI:2183691]	5.38047e-05
ENSMUSG00000026034	1127.73	1.35831	0.272606	4.98271	6.27e-07	4.03e-05	Clk1	1	58449348	58463225	-1	CDC-like kinase 1 [Source:MGI Symbol;Acc:MGI:107403]	5.38427e-05
ENSMUSG00000047036	3302.41	0.416257	0.0835951	4.97945	6.38e-07	4.08e-05	Zfp445	9	122673594	122695071	-1	zinc finger protein 445 [Source:MGI Symbol;Acc:MGI:2143340]	5.45646e-05
ENSMUSG00000020994	1270.95	0.566033	0.114006	4.96493	6.87e-07	4.38e-05	Pnn	12	59113670	59120784	1	pinin [Source:MGI Symbol;Acc:MGI:1100514]	5.85174e-05
ENSMUSG00000096764	217.199	-0.862993	0.174411	-4.94803	7.5e-07	4.76e-05	Gm21985	2	112096659	112236664	1	predicted gene 21985 [Source:MGI Symbol;Acc:MGI:5439454]	6.3624e-05
ENSMUSG00000029022	239.341	1.0789	0.218082	4.94723	7.53e-07	4.76e-05	Miip	4	147945235	147953273	-1	migration and invasion inhibitory protein [Source:MGI Symbol;Acc:MGI:106506]	6.3624e-05
ENSMUSG00000041130	944.492	0.440988	0.0894434	4.93036	8.21e-07	5.16e-05	Zfp598	17	24888661	24900990	1	zinc finger protein 598 [Source:MGI Symbol;Acc:MGI:2670965]	6.90683e-05
ENSMUSG00000054874	1338.02	0.415813	0.0843487	4.92969	8.24e-07	5.16e-05	Pcnx3	19	5714663	5738936	-1	pecanex homolog 3 [Source:MGI Symbol;Acc:MGI:1861733]	6.90683e-05
ENSMUSG00000021494	406.101	0.607334	0.123305	4.92548	8.42e-07	5.26e-05	Ddx41	13	55678223	55684471	-1	DEAD box helicase 41 [Source:MGI Symbol;Acc:MGI:1920185]	7.0297e-05
ENSMUSG00000068917	439.085	0.741965	0.150985	4.91417	8.92e-07	5.55e-05	Clk2	3	89072102	89084228	1	CDC-like kinase 2 [Source:MGI Symbol;Acc:MGI:1098669]	7.4177e-05
ENSMUSG00000030846	1258.02	0.474025	0.0965868	4.90776	9.21e-07	5.71e-05	Tial1	7	128041501	128063441	-1	Tia1 cytotoxic granule-associated RNA binding protein-like 1 [Source:MGI Symbol;Acc:MGI:107913]	7.62871e-05
ENSMUSG00000032316	1663.04	0.397736	0.0810601	4.90667	9.26e-07	5.72e-05	Clk3	9	57657907	57673143	-1	CDC-like kinase 3 [Source:MGI Symbol;Acc:MGI:1098670]	7.64004e-05
ENSMUSG00000108037	55.2848	1.8758	0.382531	4.90365	9.41e-07	5.78e-05	Gm44597	6	125016779	125028505	1	predicted gene 44597 [Source:MGI Symbol;Acc:MGI:5753173]	7.73348e-05
ENSMUSG00000042073	478.487	0.570021	0.116315	4.90065	9.55e-07	5.85e-05	Abhd14b	9	106324658	106330122	1	abhydrolase domain containing 14b [Source:MGI Symbol;Acc:MGI:1923741]	7.81799e-05
ENSMUSG00000025278	1466.34	0.70311	0.144545	4.8643	1.15e-06	7.01e-05	Flnb	14	14518185	14651816	-1	filamin, beta [Source:MGI Symbol;Acc:MGI:2446089]	9.37785e-05
ENSMUSG00000029389	365.597	0.534802	0.109975	4.86295	1.16e-06	7.03e-05	Ddx55	5	124690927	124707723	1	DEAD box helicase 55 [Source:MGI Symbol;Acc:MGI:1915098]	9.42287e-05
ENSMUSG00000080316	192.292	1.52481	0.31384	4.85857	1.18e-06	7.16e-05	Spaca6	17	18047420	18063271	1	sperm acrosome associated 6 [Source:MGI Symbol;Acc:MGI:1922452]	9.54847e-05
ENSMUSG00000032356	690.789	0.404091	0.0834756	4.84083	1.29e-06	7.8e-05	Rasgrf1	9	89791961	89909030	1	RAS protein-specific guanine nucleotide-releasing factor 1 [Source:MGI Symbol;Acc:MGI:99694]	0.000103986
ENSMUSG00000032525	1621.56	1.06541	0.220597	4.82968	1.37e-06	8.22e-05	Nktr	9	121548235	121585909	1	natural killer tumor recognition sequence [Source:MGI Symbol;Acc:MGI:97346]	0.000110013
ENSMUSG00000021413	1667.76	0.441458	0.0915617	4.82143	1.43e-06	8.51e-05	Prpf4b	13	35059285	35090047	1	pre-mRNA processing factor 4B [Source:MGI Symbol;Acc:MGI:109584]	0.000113961
ENSMUSG00000024949	2537.29	0.479298	0.0994183	4.82103	1.43e-06	8.51e-05	Sf1	19	6413720	6428060	1	splicing factor 1 [Source:MGI Symbol;Acc:MGI:1095403]	0.000113961
ENSMUSG00000112241	31.9214	-2.86192	0.594704	-4.81235	1.49e-06	8.86e-05	Gm49325	10	77442031	77477377	1	predicted gene, 49325 [Source:MGI Symbol;Acc:MGI:6121509]	0.000118295
ENSMUSG00000027881	936.981	0.458082	0.0952078	4.81139	1.5e-06	8.87e-05	Prpf38b	3	108810121	108819043	-1	PRP38 pre-mRNA processing factor 38 (yeast) domain containing B [Source:MGI Symbol;Acc:MGI:1914171]	0.000118641
ENSMUSG00000024869	33.9451	1.7872	0.371579	4.80975	1.51e-06	8.91e-05	Gm49405	19	4050626	4055816	1	predicted gene, 49405 [Source:MGI Symbol;Acc:MGI:6155029]	0.000118985
ENSMUSG00000051510	3897.64	0.400566	0.083614	4.79066	1.66e-06	9.76e-05	Mafg	11	120515943	120524426	-1	v-maf musculoaponeurotic fibrosarcoma oncogene family, protein G (avian) [Source:MGI Symbol;Acc:MGI:96911]	0.000130316
ENSMUSG00000055866	230.964	0.806462	0.168466	4.78708	1.69e-06	9.9e-05	Per2	1	91343704	91387046	-1	period circadian clock 2 [Source:MGI Symbol;Acc:MGI:1195265]	0.000132178
ENSMUSG00000036989	2535.61	0.356832	0.0745727	4.78502	1.71e-06	9.97e-05	Trim3	7	105253670	105282778	-1	tripartite motif-containing 3 [Source:MGI Symbol;Acc:MGI:1860040]	0.000133247
ENSMUSG00000028423	1357.22	0.359901	0.0752365	4.7836	1.72e-06	0.0001	Nfx1	4	40970906	41025993	1	nuclear transcription factor, X-box binding 1 [Source:MGI Symbol;Acc:MGI:1921414]	0.000133532
ENSMUSG00000108218	55.3856	1.97859	0.414033	4.77882	1.76e-06	0.00010203	Olfr1372-ps1	11	52045549	52058986	-1	olfactory receptor 1372, pseudogene 1 [Source:MGI Symbol;Acc:MGI:3031206]	0.000136135
ENSMUSG00000036057	2321.09	0.447598	0.0936911	4.77737	1.78e-06	0.00010239	Ptpn23	9	110214150	110237281	-1	protein tyrosine phosphatase, non-receptor type 23 [Source:MGI Symbol;Acc:MGI:2144837]	0.000137177
ENSMUSG00000085028	52.4914	2.106	0.440991	4.77561	1.79e-06	0.000102916	Slc2a4rg-ps	2	181026043	181029379	1	Slc2a4 regulator, pseudogene [Source:MGI Symbol;Acc:MGI:3651388]	0.000137445
ENSMUSG00000022983	833.479	0.488185	0.102246	4.7746	1.8e-06	0.000103055	Scaf4	16	90022568	90081391	-1	SR-related CTD-associated factor 4 [Source:MGI Symbol;Acc:MGI:2146350]	0.00013771
ENSMUSG00000000416	570.897	0.601892	0.126246	4.76762	1.86e-06	0.000106304	Cttnbp2	6	18366477	18514842	-1	cortactin binding protein 2 [Source:MGI Symbol;Acc:MGI:1353467]	0.000141785
ENSMUSG00000103593	19.6924	3.05989	0.641975	4.76638	1.88e-06	0.000106576	Gm37352	8	84927498	84929678	1	predicted gene, 37352 [Source:MGI Symbol;Acc:MGI:5610580]	0.000142792
ENSMUSG00000016921	2789.57	0.299996	0.0629967	4.7621	1.92e-06	0.00010847	Srsf6	2	162773448	162779041	1	serine and arginine-rich splicing factor 6 [Source:MGI Symbol;Acc:MGI:1915246]	0.000145305
ENSMUSG00000001750	390.986	0.887731	0.186814	4.75194	2.01e-06	0.000113654	Tcirg1	19	3946050	3957133	-1	T cell, immune regulator 1, ATPase, H+ transporting, lysosomal V0 protein A3 [Source:MGI Symbol;Acc:MGI:1350931]	0.000151571
ENSMUSG00000026074	3763.27	0.352885	0.0743424	4.74676	2.07e-06	0.000116188	Map4k4	1	39940073	40065470	1	mitogen-activated protein kinase kinase kinase kinase 4 [Source:MGI Symbol;Acc:MGI:1349394]	0.000155538
ENSMUSG00000056724	243.546	0.82294	0.173622	4.73984	2.14e-06	0.000119798	Nbeal2	9	110453857	110483229	-1	neurobeachin-like 2 [Source:MGI Symbol;Acc:MGI:2448554]	0.000160226
ENSMUSG00000024542	136.193	1.12471	0.237366	4.7383	2.16e-06	0.000120287	Cep192	18	67933177	68018241	1	centrosomal protein 192 [Source:MGI Symbol;Acc:MGI:1918049]	0.00016115
ENSMUSG00000001128	60.9052	1.37556	0.29069	4.73204	2.22e-06	0.000123616	Cfp	X	20791693	20797794	-1	complement factor properdin [Source:MGI Symbol;Acc:MGI:97545]	0.000165041
ENSMUSG00000036882	952.005	1.35165	0.285792	4.72948	2.25e-06	0.000124745	Arhgap33	7	30221651	30234485	-1	Rho GTPase activating protein 33 [Source:MGI Symbol;Acc:MGI:2673998]	0.000166682
ENSMUSG00000040479	16002.4	0.458098	0.0968837	4.72833	2.26e-06	0.000125016	Dgkz	2	91763169	91806209	-1	diacylglycerol kinase zeta [Source:MGI Symbol;Acc:MGI:1278339]	0.000166836
ENSMUSG00000102813	182.948	2.41753	0.512844	4.71396	2.43e-06	0.000133699	Gm37795	4	150152996	150155454	1	predicted gene, 37795 [Source:MGI Symbol;Acc:MGI:5611023]	0.000178758
ENSMUSG00000024186	1069.58	1.55813	0.330673	4.71201	2.45e-06	0.000134514	Rgs11	17	26421925	26430298	1	regulator of G-protein signaling 11 [Source:MGI Symbol;Acc:MGI:1354739]	0.000179601
ENSMUSG00000070000	867.197	0.456651	0.0971322	4.70133	2.58e-06	0.000141024	Fcho1	8	72161031	72178360	-1	FCH domain only 1 [Source:MGI Symbol;Acc:MGI:1921265]	0.000188474
ENSMUSG00000085396	1285.95	1.8501	0.393559	4.70095	2.59e-06	0.000141024	Firre	X	49644621	49724198	-1	functional intergenic repeating RNA element [Source:MGI Symbol;Acc:MGI:2147989]	0.00018855
ENSMUSG00000037400	1768.88	0.356209	0.0759693	4.68886	2.75e-06	0.000149106	Atp11b	3	35808255	35910425	1	ATPase, class VI, type 11B [Source:MGI Symbol;Acc:MGI:1923545]	0.000199508
ENSMUSG00000063229	9709.5	-0.231048	0.0492849	-4.68801	2.76e-06	0.000149188	Ldha	7	46490899	46505051	1	lactate dehydrogenase A [Source:MGI Symbol;Acc:MGI:96759]	0.000199545
ENSMUSG00000046854	290.271	0.863637	0.184249	4.68734	2.77e-06	0.000149188	Pip5kl1	2	32464809	32473794	1	phosphatidylinositol-4-phosphate 5-kinase-like 1 [Source:MGI Symbol;Acc:MGI:2448520]	0.000199582
ENSMUSG00000101174	80.7048	1.63729	0.349389	4.68615	2.78e-06	0.000149542	Hoxd4	2	74542273	74559504	1	homeobox D4 [Source:MGI Symbol;Acc:MGI:96208]	0.000199619
ENSMUSG00000039137	1038.71	0.362812	0.0775278	4.67977	2.87e-06	0.00015375	Whrn	4	63333147	63414228	-1	whirlin [Source:MGI Symbol;Acc:MGI:2682003]	0.000205381
ENSMUSG00000044349	15653.5	2.09254	0.44821	4.66865	3.03e-06	0.000161759	Snhg11	2	158217558	158228071	1	small nucleolar RNA host gene 11 [Source:MGI Symbol;Acc:MGI:2441845]	0.000216095
ENSMUSG00000086370	160.154	1.14162	0.244811	4.66328	3.11e-06	0.000165411	Ftx	X	102604513	102667396	-1	Ftx transcript, Xist regulator (non-protein coding) [Source:MGI Symbol;Acc:MGI:1926128]	0.000221016
ENSMUSG00000030822	552.177	0.577332	0.12382	4.66267	3.12e-06	0.000165411	Prr14	7	127058783	127075931	1	proline rich 14 [Source:MGI Symbol;Acc:MGI:2384565]	0.000221016
ENSMUSG00000041096	1821.68	0.500041	0.107328	4.65899	3.18e-06	0.000167622	Tspyl2	X	151119848	151125421	-1	TSPY-like 2 [Source:MGI Symbol;Acc:MGI:106244]	0.000223759
ENSMUSG00000024969	2260.9	0.303411	0.0651299	4.65855	3.18e-06	0.000167622	Mark2	19	7252761	7319225	-1	MAP/microtubule affinity regulating kinase 2 [Source:MGI Symbol;Acc:MGI:99638]	0.000223759
ENSMUSG00000040867	364.742	0.617044	0.132675	4.6508	3.31e-06	0.000173467	Begain	12	108998113	109034143	-1	brain-enriched guanylate kinase-associated [Source:MGI Symbol;Acc:MGI:3044626]	0.00023213
ENSMUSG00000028060	771.144	0.479596	0.10315	4.64951	3.33e-06	0.000173974	Khdc4	3	88593110	88620231	1	KH domain containing 4, pre-mRNA splicing factor [Source:MGI Symbol;Acc:MGI:1921450]	0.000232757
ENSMUSG00000104814	41.2605	2.32836	0.501634	4.64156	3.46e-06	0.000180208	Gm42979	5	129633211	129635438	1	predicted gene 42979 [Source:MGI Symbol;Acc:MGI:5663116]	0.000241043
ENSMUSG00000035722	7573.24	0.234208	0.0505458	4.63358	3.59e-06	0.00018668	Abca7	10	79832328	79851406	1	ATP-binding cassette, sub-family A (ABC1), member 7 [Source:MGI Symbol;Acc:MGI:1351646]	0.000249274
ENSMUSG00000032119	415.864	0.618838	0.133753	4.62672	3.72e-06	0.000192339	Hinfp	9	44203737	44216968	-1	histone H4 transcription factor [Source:MGI Symbol;Acc:MGI:2429620]	0.000257451
ENSMUSG00000042570	600.419	0.481032	0.104051	4.62306	3.78e-06	0.00019512	Mier2	10	79376079	79391033	-1	MIER family member 2 [Source:MGI Symbol;Acc:MGI:1917677]	0.000260746
ENSMUSG00000027330	206.873	0.758418	0.164198	4.61891	3.86e-06	0.000198416	Cdc25b	2	131028869	131040417	1	cell division cycle 25B [Source:MGI Symbol;Acc:MGI:99701]	0.000265394
ENSMUSG00000021495	957.441	1.40406	0.304143	4.61645	3.9e-06	0.000200126	Fam193b	13	55687129	55718933	-1	family with sequence similarity 193, member B [Source:MGI Symbol;Acc:MGI:2385851]	0.000267271
ENSMUSG00000036591	2408.87	0.446796	0.0970061	4.60585	4.11e-06	0.000208507	Arhgap21	2	20852730	20973692	-1	Rho GTPase activating protein 21 [Source:MGI Symbol;Acc:MGI:1918685]	0.000278716
ENSMUSG00000038838	775.951	0.655905	0.142411	4.6057	4.11e-06	0.000208507	Vars2	17	35966526	35978484	-1	valyl-tRNA synthetase 2, mitochondrial [Source:MGI Symbol;Acc:MGI:1916165]	0.000278716
ENSMUSG00000090077	179.633	1.07528	0.233477	4.6055	4.11e-06	0.000208507	Lime1	2	181021871	181025421	1	Lck interacting transmembrane adaptor 1 [Source:MGI Symbol;Acc:MGI:1919949]	0.000278716
ENSMUSG00000096780	230.143	1.14786	0.24925	4.60523	4.12e-06	0.000208507	Tmem181b-ps	17	6705923	6734421	-1	transmembrane protein 181B, pseudogene [Source:MGI Symbol;Acc:MGI:3779544]	0.000278716
ENSMUSG00000024109	5729.16	-0.260657	0.0566136	-4.60413	4.14e-06	0.00020894	Nrxn1	17	90341059	91400499	-1	neurexin I [Source:MGI Symbol;Acc:MGI:1096391]	0.000279171
ENSMUSG00000046169	45.8552	1.44197	0.313591	4.59827	4.26e-06	0.000214217	Adamts6	13	104424343	104633203	1	a disintegrin-like and metallopeptidase (reprolysin type) with thrombospondin type 1 motif, 6 [Source:MGI Symbol;Acc:MGI:1347348]	0.000286345
ENSMUSG00000004561	208.956	0.962075	0.209294	4.59676	4.29e-06	0.000215091	Mettl17	14	52122299	52130496	1	methyltransferase like 17 [Source:MGI Symbol;Acc:MGI:1098577]	0.000287444
ENSMUSG00000072501	747.031	0.446596	0.0972015	4.59454	4.34e-06	0.000216699	Phf20l1	15	66449409	66519825	1	PHD finger protein 20-like 1 [Source:MGI Symbol;Acc:MGI:2444412]	0.000289619
ENSMUSG00000053646	472.633	0.628233	0.136756	4.59384	4.35e-06	0.000216746	Plxnb1	9	108924457	108948985	1	plexin B1 [Source:MGI Symbol;Acc:MGI:2154238]	0.000289619
ENSMUSG00000027966	1219.04	1.64692	0.358685	4.59156	4.4e-06	0.000218435	Col11a1	3	113824189	114014367	1	collagen, type XI, alpha 1 [Source:MGI Symbol;Acc:MGI:88446]	0.000292024
ENSMUSG00000116812	77.3388	1.34199	0.292816	4.58305	4.58e-06	0.000226804	Gm2792	17	6389879	6412123	-1	predicted gene 2792 [Source:MGI Symbol;Acc:MGI:3780960]	0.000303015
ENSMUSG00000038437	1714.61	0.384772	0.083975	4.58198	4.61e-06	0.000227251	Mllt6	11	97554240	97576289	1	myeloid/lymphoid or mixed-lineage leukemia; translocated to, 6 [Source:MGI Symbol;Acc:MGI:1935145]	0.000303751
ENSMUSG00000022987	231.144	0.621458	0.135651	4.5813	4.62e-06	0.000227275	Zfp641	15	98183466	98194042	-1	zinc finger protein 641 [Source:MGI Symbol;Acc:MGI:2442788]	0.000303751
ENSMUSG00000069565	1074.38	0.37803	0.0827397	4.5689	4.9e-06	0.00024039	Dazap1	10	80097320	80124242	1	DAZ associated protein 1 [Source:MGI Symbol;Acc:MGI:1917498]	0.000321156
ENSMUSG00000097391	367.251	2.35271	0.515065	4.5678	4.93e-06	0.000240911	Mirg	12	109696198	109715894	1	miRNA containing gene [Source:MGI Symbol;Acc:MGI:3781106]	0.000322119
ENSMUSG00000018334	1170.22	0.480256	0.105214	4.56456	5.01e-06	0.000243898	Ksr1	11	78904266	79037233	-1	kinase suppressor of ras 1 [Source:MGI Symbol;Acc:MGI:105051]	0.000326332
ENSMUSG00000027397	3469.01	0.326591	0.0715652	4.56355	5.03e-06	0.000244325	Slc20a1	2	129040684	129053536	1	solute carrier family 20, member 1 [Source:MGI Symbol;Acc:MGI:108392]	0.000326624
ENSMUSG00000028367	7232.29	-0.261027	0.0572784	-4.55717	5.18e-06	0.000251086	Txn1	4	57943373	57956411	-1	thioredoxin 1 [Source:MGI Symbol;Acc:MGI:98874]	0.000335329
ENSMUSG00000039176	1655.79	0.423448	0.09308	4.54929	5.38e-06	0.000259871	Polg	7	79095979	79116110	-1	polymerase (DNA directed), gamma [Source:MGI Symbol;Acc:MGI:1196389]	0.000347208
ENSMUSG00000002997	8257.52	-0.228834	0.0503295	-4.54673	5.45e-06	0.000261984	Prkar2b	12	32008475	32111295	-1	protein kinase, cAMP dependent regulatory, type II beta [Source:MGI Symbol;Acc:MGI:97760]	0.000350222
ENSMUSG00000059326	330.856	0.920778	0.202534	4.5463	5.46e-06	0.000261984	Csf2ra	19	61212395	61216867	-1	colony stimulating factor 2 receptor, alpha, low-affinity (granulocyte-macrophage) [Source:MGI Symbol;Acc:MGI:1339754]	0.000350222
ENSMUSG00000002871	628.35	0.444011	0.0977493	4.54234	5.56e-06	0.000265491	Tpra1	6	88879233	88889220	1	transmembrane protein, adipocyte asscociated 1 [Source:MGI Symbol;Acc:MGI:1345190]	0.000355113
ENSMUSG00000023186	12005.1	-0.203802	0.0448685	-4.54222	5.57e-06	0.000265491	Vwa5a	9	38629564	38654633	1	von Willebrand factor A domain containing 5A [Source:MGI Symbol;Acc:MGI:1915026]	0.000355113
ENSMUSG00000034059	939.045	0.413656	0.091124	4.53948	5.64e-06	0.000268143	Ypel4	2	84564402	84568999	1	yippee like 4 [Source:MGI Symbol;Acc:MGI:3605071]	0.000358489
ENSMUSG00000098051	25.3499	2.22989	0.492273	4.52979	5.9e-06	0.000279901	Gm27032	2	180535898	180537013	1	predicted gene, 27032 [Source:MGI Symbol;Acc:MGI:5504147]	0.000373886
ENSMUSG00000032580	2216.5	0.389166	0.0859955	4.52542	6.03e-06	0.000284303	Rbm5	9	107617570	107648195	-1	RNA binding motif protein 5 [Source:MGI Symbol;Acc:MGI:1933204]	0.000379958
ENSMUSG00000041215	543.57	0.766068	0.169305	4.52478	6.05e-06	0.000284303	Yeats2	16	19959813	20051323	1	YEATS domain containing 2 [Source:MGI Symbol;Acc:MGI:2447762]	0.000379958
ENSMUSG00000029328	1691	0.434384	0.0960053	4.52459	6.05e-06	0.000284303	Hnrnpdl	5	100181436	100187523	-1	heterogeneous nuclear ribonucleoprotein D-like [Source:MGI Symbol;Acc:MGI:1355299]	0.000379958
ENSMUSG00000031310	1856.42	0.62762	0.13879	4.5221	6.12e-06	0.000286815	Zmym3	X	100447990	100464455	-1	zinc finger, MYM-type 3 [Source:MGI Symbol;Acc:MGI:1927231]	0.00038321
ENSMUSG00000109243	20.2423	2.57485	0.569909	4.518	6.24e-06	0.000291551	Gm45867	7	81523952	81526268	1	predicted gene 45867 [Source:MGI Symbol;Acc:MGI:5804982]	0.000389565
ENSMUSG00000033767	1452.12	0.341255	0.0755722	4.51562	6.31e-06	0.000293976	Tmem131l	3	83804962	83947482	-1	transmembrane 131 like [Source:MGI Symbol;Acc:MGI:2443399]	0.000392769
ENSMUSG00000019505	54237.7	-0.185462	0.0411443	-4.5076	6.56e-06	0.000304403	Ubb	11	62441997	62444039	1	ubiquitin B [Source:MGI Symbol;Acc:MGI:98888]	0.000407126
ENSMUSG00000018932	472.582	0.470821	0.104578	4.50209	6.73e-06	0.000311245	Map2k3	11	60822859	60843637	1	mitogen-activated protein kinase kinase 3 [Source:MGI Symbol;Acc:MGI:1346868]	0.000415844
ENSMUSG00000042682	2832.19	-0.320108	0.0711094	-4.50163	6.74e-06	0.000311245	Selenok	14	29690265	29697619	1	selenoprotein K [Source:MGI Symbol;Acc:MGI:1931466]	0.000415844
ENSMUSG00000032558	237.788	1.1976	0.266333	4.49664	6.9e-06	0.000317708	Nphp3	9	103879743	103921017	1	nephronophthisis 3 (adolescent) [Source:MGI Symbol;Acc:MGI:1921275]	0.000424471
ENSMUSG00000046897	1706.43	0.381471	0.0848693	4.4948	6.96e-06	0.000319526	Zfp740	15	102111684	102124041	1	zinc finger protein 740 [Source:MGI Symbol;Acc:MGI:1915994]	0.000426914
ENSMUSG00000109394	139.669	0.983485	0.218866	4.49355	7e-06	0.000320479	A230057D06Rik	7	61354267	61578438	-1	RIKEN cDNA A230057D06 gene [Source:MGI Symbol;Acc:MGI:2442922]	0.000428119
ENSMUSG00000016128	1813.58	0.329332	0.0733651	4.48895	7.16e-06	0.000326523	Stard13	5	150960975	151157301	-1	StAR-related lipid transfer (START) domain containing 13 [Source:MGI Symbol;Acc:MGI:2385331]	0.000436635
ENSMUSG00000041571	8356.52	-0.231072	0.0514957	-4.48721	7.22e-06	0.000328259	Selenow	7	15651133	15656327	-1	selenoprotein W [Source:MGI Symbol;Acc:MGI:1100878]	0.000439022
ENSMUSG00000106446	30.3663	1.91102	0.426505	4.48066	7.44e-06	0.000337512	Gm42970	3	127091971	127093322	-1	predicted gene 42970 [Source:MGI Symbol;Acc:MGI:5663107]	0.000451096
ENSMUSG00000018567	4386.68	-0.22043	0.0492415	-4.4765	7.59e-06	0.000342231	Gabarap	11	69881969	69885777	1	gamma-aminobutyric acid receptor associated protein [Source:MGI Symbol;Acc:MGI:1861742]	0.000457553
ENSMUSG00000002486	288.001	0.656302	0.146612	4.47647	7.59e-06	0.000342231	Tchp	5	114845821	114860388	1	trichoplein, keratin filament binding [Source:MGI Symbol;Acc:MGI:1925082]	0.000457553
ENSMUSG00000018378	1119.49	0.450835	0.100837	4.47093	7.79e-06	0.000350216	Cuedc1	11	87988884	88084966	1	CUE domain containing 1 [Source:MGI Symbol;Acc:MGI:2144281]	0.000468268
ENSMUSG00000093593	231.54	0.886929	0.198686	4.46397	8.05e-06	0.000360759	Gm20683	17	26053439	26060737	-1	predicted gene 20683 [Source:MGI Symbol;Acc:MGI:5313130]	0.000482518
ENSMUSG00000026970	4080.79	0.238562	0.0534557	4.46281	8.09e-06	0.000361693	Rbms1	2	60580537	60793536	-1	RNA binding motif, single stranded interacting protein 1 [Source:MGI Symbol;Acc:MGI:1861774]	0.000483538
ENSMUSG00000054770	431.822	0.441294	0.0990341	4.45598	8.35e-06	0.000372338	Kctd18	1	57994260	58058115	-1	potassium channel tetramerisation domain containing 18 [Source:MGI Symbol;Acc:MGI:3603813]	0.000497665
ENSMUSG00000015522	488.011	0.692793	0.155719	4.44901	8.63e-06	0.000383552	Arnt	3	95341699	95404551	1	aryl hydrocarbon receptor nuclear translocator [Source:MGI Symbol;Acc:MGI:88071]	0.0005129
ENSMUSG00000038738	944.137	0.508182	0.114258	4.44767	8.68e-06	0.000384865	Shank1	7	43959677	44009996	1	SH3 and multiple ankyrin repeat domains 1 [Source:MGI Symbol;Acc:MGI:3613677]	0.000514418
ENSMUSG00000039105	3069	-0.287938	0.0647793	-4.44491	8.79e-06	0.000388737	Atp6v1g1	4	63463009	63468987	1	ATPase, H+ transporting, lysosomal V1 subunit G1 [Source:MGI Symbol;Acc:MGI:1913540]	0.000519474
ENSMUSG00000087042	47.5153	1.46257	0.329277	4.44175	8.92e-06	0.000393395	Gm11611	11	97410438	97412721	-1	predicted gene 11611 [Source:MGI Symbol;Acc:MGI:3707011]	0.00052568
ENSMUSG00000019558	1763.93	0.411741	0.0927495	4.43928	9.03e-06	0.000396813	Slc6a8	X	72716756	72726108	1	solute carrier family 6 (neurotransmitter transporter, creatine), member 8 [Source:MGI Symbol;Acc:MGI:2147834]	0.000530676
ENSMUSG00000037989	1568.82	0.292376	0.0659951	4.43027	9.41e-06	0.000412606	Wnk2	13	49189779	49301490	-1	WNK lysine deficient protein kinase 2 [Source:MGI Symbol;Acc:MGI:1922857]	0.000551468
ENSMUSG00000055692	119.647	0.830948	0.187597	4.42943	9.45e-06	0.000413078	Tmem191c	16	17093941	17101093	1	transmembrane protein 191C [Source:MGI Symbol;Acc:MGI:107238]	0.000552274
ENSMUSG00000034656	4004.21	0.247139	0.055899	4.42117	9.82e-06	0.000428001	Cacna1a	8	85065268	85366875	1	calcium channel, voltage-dependent, P/Q type, alpha 1A subunit [Source:MGI Symbol;Acc:MGI:109482]	0.000572307
ENSMUSG00000097767	15758.1	2.35284	0.532305	4.4201	9.87e-06	0.00042894	Miat	5	112361094	112377261	-1	myocardial infarction associated transcript (non-protein coding) [Source:MGI Symbol;Acc:MGI:2444886]	0.000573632
ENSMUSG00000090124	42.6701	1.69692	0.384329	4.41527	1.01e-05	0.000437417	Ugt1a7c	1	88022784	88147724	1	UDP glucuronosyltransferase 1 family, polypeptide A7C [Source:MGI Symbol;Acc:MGI:3032636]	0.000585383
ENSMUSG00000105345	29.7126	2.00219	0.45425	4.40769	1.04e-05	0.00045051	BC030343	5	143255830	143258268	1	cDNA sequence BC030343 [Source:MGI Symbol;Acc:MGI:2679267]	0.000599467
ENSMUSG00000038276	4654.37	0.232925	0.0528331	4.4087	1.04e-05	0.000449648	Asic3	5	24618390	24622833	1	acid-sensing (proton-gated) ion channel 3 [Source:MGI Symbol;Acc:MGI:2159339]	0.000599467
ENSMUSG00000009741	997.292	0.504342	0.114738	4.39561	1.1e-05	0.000475027	Ubp1	9	113760002	113806270	1	upstream binding protein 1 [Source:MGI Symbol;Acc:MGI:104889]	0.00063232
ENSMUSG00000029720	347.995	0.608345	0.13848	4.39302	1.12e-05	0.000478787	Gm20605	5	137627437	137641161	1	predicted gene 20605 [Source:MGI Symbol;Acc:MGI:5306917]	0.000640317
ENSMUSG00000038884	628.763	0.461477	0.105055	4.39271	1.12e-05	0.000478787	Shfl	9	20779938	20785603	1	shiftless antiviral inhibitor of ribosomal frameshifting [Source:MGI Symbol;Acc:MGI:2441788]	0.000640317
ENSMUSG00000024968	465.123	0.538388	0.122714	4.38734	1.15e-05	0.000489434	Rcor2	19	7244690	7252590	1	REST corepressor 2 [Source:MGI Symbol;Acc:MGI:1859854]	0.000655687
ENSMUSG00000062044	793.566	1.51863	0.346298	4.38532	1.16e-05	0.000492651	Lmtk3	7	45433162	45453568	1	lemur tyrosine kinase 3 [Source:MGI Symbol;Acc:MGI:3039582]	0.000659601
ENSMUSG00000079179	358.985	0.566478	0.129238	4.38322	1.17e-05	0.000496098	Rab10os	12	3285504	3300377	1	RAB10, member RAS oncogene family, opposite strand [Source:MGI Symbol;Acc:MGI:1921423]	0.000663494
ENSMUSG00000009418	5678.67	0.296599	0.0677992	4.37467	1.22e-05	0.000514558	Nav1	1	135362318	135615843	-1	neuron navigator 1 [Source:MGI Symbol;Acc:MGI:2183683]	0.000689989
ENSMUSG00000061410	626.94	0.536979	0.1228	4.37278	1.23e-05	0.000517629	Zcchc14	8	122325442	122379640	-1	zinc finger, CCHC domain containing 14 [Source:MGI Symbol;Acc:MGI:2159407]	0.000693779
ENSMUSG00000009566	313.302	0.564622	0.129214	4.36967	1.24e-05	0.000522269	Fpgs	2	32572621	32594157	-1	folylpolyglutamyl synthetase [Source:MGI Symbol;Acc:MGI:95576]	0.00069569
ENSMUSG00000028339	516.21	0.659221	0.150821	4.37088	1.24e-05	0.000520756	Col15a1	4	47208161	47313167	1	collagen, type XV, alpha 1 [Source:MGI Symbol;Acc:MGI:88449]	0.00069569
ENSMUSG00000045761	196.146	0.893028	0.2044	4.36902	1.25e-05	0.000522429	Togaram2	17	71980256	72036664	1	TOG array regulator of axonemal microtubules 2 [Source:MGI Symbol;Acc:MGI:2443498]	0.000699435
ENSMUSG00000032308	584.349	0.604547	0.138611	4.36147	1.29e-05	0.000537932	Ulk3	9	57496735	57503516	1	unc-51-like kinase 3 [Source:MGI Symbol;Acc:MGI:1918992]	0.000717998
ENSMUSG00000041921	395.83	0.520308	0.119267	4.36256	1.29e-05	0.000536679	Metap1d	2	71283620	71355538	1	methionyl aminopeptidase type 1D (mitochondrial) [Source:MGI Symbol;Acc:MGI:1913809]	0.000717998
ENSMUSG00000087396	65.5263	1.42979	0.328159	4.35701	1.32e-05	0.000547536	4933407K13Rik	X	74750538	74808305	-1	RIKEN cDNA 4933407K13 gene [Source:MGI Symbol;Acc:MGI:1921646]	0.000732757
ENSMUSG00000049164	298.323	-0.632909	0.145324	-4.35516	1.33e-05	0.00055075	Zfp518a	19	40883149	40906391	1	zinc finger protein 518A [Source:MGI Symbol;Acc:MGI:1919922]	0.000736365
ENSMUSG00000062296	61.5875	1.25514	0.288444	4.35142	1.35e-05	0.00055876	Trank1	9	111140807	111224843	1	tetratricopeptide repeat and ankyrin repeat containing 1 [Source:MGI Symbol;Acc:MGI:1341834]	0.000745476
ENSMUSG00000072889	161.892	0.709151	0.163044	4.34946	1.36e-05	0.000562301	Nfxl1	5	72670644	72717027	-1	nuclear transcription factor, X-box binding-like 1 [Source:MGI Symbol;Acc:MGI:1923646]	0.000749032
ENSMUSG00000052752	815.979	0.609197	0.140106	4.34811	1.37e-05	0.000563382	Traf7	17	24727536	24746912	-1	TNF receptor-associated factor 7 [Source:MGI Symbol;Acc:MGI:3042141]	0.00075061
ENSMUSG00000028469	4197.82	0.324619	0.0746613	4.34789	1.37e-05	0.000563382	Npr2	4	43631935	43651244	1	natriuretic peptide receptor 2 [Source:MGI Symbol;Acc:MGI:97372]	0.00075061
ENSMUSG00000020220	3387.55	-0.395389	0.0909975	-4.34506	1.39e-05	0.000569213	Vps13d	4	144699192	144921575	-1	vacuolar protein sorting 13D [Source:MGI Symbol;Acc:MGI:2448530]	0.00075959
ENSMUSG00000045409	549.218	0.456609	0.105109	4.34416	1.4e-05	0.000570068	Trim39	17	36569765	36583139	-1	tripartite motif-containing 39 [Source:MGI Symbol;Acc:MGI:1890659]	0.000763073
ENSMUSG00000061762	3404.83	-0.458001	0.105491	-4.34163	1.41e-05	0.00057519	Tac1	6	7554879	7565834	1	tachykinin 1 [Source:MGI Symbol;Acc:MGI:98474]	0.000766537
ENSMUSG00000027185	579.479	0.397802	0.091656	4.34017	1.42e-05	0.00057753	Nat10	2	103551601	103591615	-1	N-acetyltransferase 10 [Source:MGI Symbol;Acc:MGI:2138939]	0.000769984
ENSMUSG00000013236	9704.28	0.253543	0.0585677	4.32905	1.5e-05	0.000605896	Ptprs	17	56719426	56783483	-1	protein tyrosine phosphatase, receptor type, S [Source:MGI Symbol;Acc:MGI:97815]	0.000811272
ENSMUSG00000034818	210.032	0.840182	0.195096	4.30651	1.66e-05	0.000669308	Celf5	10	81295061	81318543	-1	CUGBP, Elav-like family member 5 [Source:MGI Symbol;Acc:MGI:2442333]	0.000895506
ENSMUSG00000103509	16.6156	2.69318	0.625854	4.30321	1.68e-05	0.000675889	Gm38372	1	7218334	7222361	1	predicted gene, 38372 [Source:MGI Symbol;Acc:MGI:5611600]	0.000901671
ENSMUSG00000045466	223.226	0.652454	0.151583	4.30428	1.68e-05	0.000674375	Zfp956	6	47930324	47942234	1	zinc finger protein 956 [Source:MGI Symbol;Acc:MGI:2141515]	0.000901671
ENSMUSG00000040140	14.5357	-2.39343	0.556672	-4.29952	1.71e-05	0.00068549	Tdrd6	17	43926226	43941190	-1	tudor domain containing 6 [Source:MGI Symbol;Acc:MGI:2679727]	0.000915437
ENSMUSG00000040136	392.816	0.555568	0.129257	4.29816	1.72e-05	0.000687969	Abcc8	7	45753947	45829457	-1	ATP-binding cassette, sub-family C (CFTR/MRP), member 8 [Source:MGI Symbol;Acc:MGI:1352629]	0.000918454
ENSMUSG00000033149	301.444	0.895646	0.208633	4.29293	1.76e-05	0.000702613	Phldb2	16	45566606	45773961	-1	pleckstrin homology like domain, family B, member 2 [Source:MGI Symbol;Acc:MGI:2444981]	0.000937434
ENSMUSG00000107300	38.1709	1.47622	0.344501	4.2851	1.83e-05	0.000725983	Gm43279	5	66846225	66848736	1	predicted gene 43279 [Source:MGI Symbol;Acc:MGI:5663416]	0.000972257
ENSMUSG00000031447	11289.1	-0.159167	0.0371571	-4.28363	1.84e-05	0.000728935	Lamp1	8	13209161	13225338	1	lysosomal-associated membrane protein 1 [Source:MGI Symbol;Acc:MGI:96745]	0.000975107
ENSMUSG00000023064	37094.4	-0.210142	0.0491363	-4.27673	1.9e-05	0.000748974	Sncg	14	34092231	34096746	-1	synuclein, gamma [Source:MGI Symbol;Acc:MGI:1298397]	0.00100186
ENSMUSG00000048040	1029.72	-0.35369	0.0827169	-4.27591	1.9e-05	0.000748974	Arxes2	X	134894573	134896104	1	adipocyte-related X-chromosome expressed sequence 2 [Source:MGI Symbol;Acc:MGI:1924226]	0.00100186
ENSMUSG00000022228	1264.5	0.337109	0.0788465	4.2755	1.91e-05	0.000748974	Zscan26	13	21626350	21637900	-1	zinc finger and SCAN domain containing 26 [Source:MGI Symbol;Acc:MGI:3531417]	0.00100211
ENSMUSG00000041351	4331.37	0.259745	0.060754	4.27536	1.91e-05	0.000748974	Rap1gap	4	137392037	137457172	1	Rap1 GTPase-activating protein [Source:MGI Symbol;Acc:MGI:109338]	0.00100211
ENSMUSG00000024830	529.342	0.609169	0.142612	4.27151	1.94e-05	0.000760135	Rps6kb2	19	4203990	4213353	-1	ribosomal protein S6 kinase, polypeptide 2 [Source:MGI Symbol;Acc:MGI:1927343]	0.00101531
ENSMUSG00000102411	19.8059	2.47029	0.5784	4.27091	1.95e-05	0.000760317	Gm36936	9	72635422	72638170	1	predicted gene, 36936 [Source:MGI Symbol;Acc:MGI:5610164]	0.00101802
ENSMUSG00000118664	2635.1	-0.271935	0.0636958	-4.26928	1.96e-05	0.000763976	TUSC3	8	39472999	39619367	1	tumor suppressor candidate 3 [Source:NCBI gene (formerly Entrezgene);Acc:80286]	0.0010207
ENSMUSG00000033845	779.809	-0.352621	0.0826203	-4.26797	1.97e-05	0.0007666	Mrpl15	1	4843429	4855962	-1	mitochondrial ribosomal protein L15 [Source:MGI Symbol;Acc:MGI:1351639]	0.00102338
ENSMUSG00000071112	12.1323	3.25475	0.763767	4.26144	2.03e-05	NA	Spx	6	142359167	142365456	1	spexin hormone [Source:MGI Symbol;Acc:MGI:2442262]	0.00105195
ENSMUSG00000038816	922.351	0.649965	0.152546	4.2608	2.04e-05	0.000789665	Ctnnal1	4	56810935	56865188	-1	catenin (cadherin associated protein), alpha-like 1 [Source:MGI Symbol;Acc:MGI:1859649]	0.00105453
ENSMUSG00000022621	483.94	0.396824	0.0931841	4.2585	2.06e-05	0.000795869	Rabl2	15	89466736	89476126	-1	RAB, member RAS oncogene family-like 2 [Source:MGI Symbol;Acc:MGI:1915958]	0.00106226
ENSMUSG00000038538	653.912	0.590024	0.1386	4.25702	2.07e-05	0.000799161	Ubn2	6	38410885	38501760	1	ubinuclein 2 [Source:MGI Symbol;Acc:MGI:2444236]	0.00106481
ENSMUSG00000038828	1157.52	0.476352	0.112041	4.25159	2.12e-05	0.000816791	Tmem214	5	31025356	31036524	1	transmembrane protein 214 [Source:MGI Symbol;Acc:MGI:1916046]	0.00108787
ENSMUSG00000023456	14342.3	-0.168912	0.0397436	-4.25003	2.14e-05	0.000820503	Tpi1	6	124787549	124791259	-1	triosephosphate isomerase 1 [Source:MGI Symbol;Acc:MGI:98797]	0.00109546
ENSMUSG00000046808	117.903	1.00262	0.236106	4.24649	2.17e-05	0.000831558	Atp10d	5	72360672	72456118	1	ATPase, class V, type 10D [Source:MGI Symbol;Acc:MGI:2450125]	0.00110812
ENSMUSG00000075318	291.003	0.716958	0.168876	4.24547	2.18e-05	0.000833299	Scn2a	2	65451115	65597791	1	sodium channel, voltage-gated, type II, alpha [Source:MGI Symbol;Acc:MGI:98248]	0.00111053
ENSMUSG00000059824	408.063	0.571124	0.13466	4.24122	2.22e-05	0.000847206	Dbp	7	45354512	45359627	1	D site albumin promoter binding protein [Source:MGI Symbol;Acc:MGI:94866]	0.00112781
ENSMUSG00000019039	966.709	0.449013	0.105883	4.24065	2.23e-05	0.000847277	Dalrd3	9	108447085	108449973	1	DALR anticodon binding domain containing 3 [Source:MGI Symbol;Acc:MGI:1915039]	0.00112781
ENSMUSG00000053470	495.389	0.425009	0.100235	4.24011	2.23e-05	0.000847277	Kdm3a	6	71565956	71609974	-1	lysine (K)-specific demethylase 3A [Source:MGI Symbol;Acc:MGI:98847]	0.00112781
ENSMUSG00000055862	607.073	0.454537	0.107277	4.23705	2.26e-05	0.000855553	Izumo4	10	80538018	80541207	1	IZUMO family member 4 [Source:MGI Symbol;Acc:MGI:1918814]	0.00114024
ENSMUSG00000031134	729.322	0.536047	0.12652	4.23685	2.27e-05	0.000855553	Rbmx	X	56428890	56438396	-1	RNA binding motif protein, X chromosome [Source:MGI Symbol;Acc:MGI:1343044]	0.00114255
ENSMUSG00000081137	50.4849	1.29645	0.306393	4.23133	2.32e-05	0.000872636	BC022960	X	168151185	168152999	1	cDNA sequence BC022960 [Source:MGI Symbol;Acc:MGI:2670977]	0.00116215
ENSMUSG00000031808	2529.6	0.469899	0.111034	4.23204	2.32e-05	0.000871969	Slc27a1	8	72021526	72039946	1	solute carrier family 27 (fatty acid transporter), member 1 [Source:MGI Symbol;Acc:MGI:1347098]	0.00116215
ENSMUSG00000054611	2780.98	0.23474	0.0555107	4.22873	2.35e-05	0.000880677	Kdm2a	19	4364447	4448313	-1	lysine (K)-specific demethylase 2A [Source:MGI Symbol;Acc:MGI:1354736]	0.00117439
ENSMUSG00000040701	97.7081	1.19128	0.281765	4.22793	2.36e-05	0.00088174	Ap1g2	14	55336032	55344050	-1	adaptor protein complex AP-1, gamma 2 subunit [Source:MGI Symbol;Acc:MGI:1328307]	0.00117659
ENSMUSG00000042423	1084	0.508599	0.120331	4.22667	2.37e-05	0.000884576	Fbrs	7	127078371	127090883	1	fibrosin [Source:MGI Symbol;Acc:MGI:104648]	0.00117878
ENSMUSG00000041653	204.093	0.67461	0.159638	4.22587	2.38e-05	0.00088564	Pnpla3	15	84052038	84071437	1	patatin-like phospholipase domain containing 3 [Source:MGI Symbol;Acc:MGI:2151796]	0.00118096
ENSMUSG00000027692	1867.58	0.3381	0.0800809	4.22198	2.42e-05	0.000898923	Tnik	3	28317363	28730007	1	TRAF2 and NCK interacting kinase [Source:MGI Symbol;Acc:MGI:1916264]	0.00119799
ENSMUSG00000046667	162.861	0.703405	0.166921	4.21399	2.51e-05	0.000929136	Rbm12b1	4	12140264	12146731	1	RNA binding motif protein 12 B1 [Source:MGI Symbol;Acc:MGI:1919647]	0.00123962
ENSMUSG00000025188	311.547	0.821829	0.195205	4.21008	2.55e-05	0.000943171	Hps1	19	42743544	42768417	-1	HPS1, biogenesis of lysosomal organelles complex 3 subunit 1 [Source:MGI Symbol;Acc:MGI:2177763]	0.00125643
ENSMUSG00000059939	207.485	0.643791	0.152952	4.20911	2.56e-05	0.000945005	9430015G10Rik	4	156194439	156211722	1	RIKEN cDNA 9430015G10 gene [Source:MGI Symbol;Acc:MGI:2444364]	0.00125841
ENSMUSG00000032737	800.179	0.46059	0.109496	4.20646	2.59e-05	0.000951686	Inppl1	7	101471839	101487436	-1	inositol polyphosphate phosphatase-like 1 [Source:MGI Symbol;Acc:MGI:1333787]	0.00126723
ENSMUSG00000102729	157.193	0.814744	0.193661	4.20707	2.59e-05	0.000951319	Gm32444	3	118330670	118334180	1	predicted gene, 32444 [Source:MGI Symbol;Acc:MGI:5591603]	0.00126723
ENSMUSG00000046962	341.083	0.494685	0.117927	4.19484	2.73e-05	0.00099946	Zbtb21	16	97744557	97763822	-1	zinc finger and BTB domain containing 21 [Source:MGI Symbol;Acc:MGI:1927240]	0.00133263
ENSMUSG00000036555	598.775	0.515569	0.122969	4.19266	2.76e-05	0.00100679	Iqce	5	140647582	140688133	-1	IQ motif containing E [Source:MGI Symbol;Acc:MGI:1921489]	0.00134416
ENSMUSG00000039959	3047.13	0.225194	0.053796	4.18608	2.84e-05	0.00103404	Hip1	5	135435385	135573974	-1	huntingtin interacting protein 1 [Source:MGI Symbol;Acc:MGI:1099804]	0.00137993
ENSMUSG00000048997	206.694	0.79567	0.190198	4.18337	2.87e-05	0.001044	Atxn7l2	3	108109538	108118250	-1	ataxin 7-like 2 [Source:MGI Symbol;Acc:MGI:1919772]	0.00139129
ENSMUSG00000104737	36.0014	2.19685	0.525436	4.181	2.9e-05	0.00105252	Gm42937	3	101487620	101488371	-1	predicted gene 42937 [Source:MGI Symbol;Acc:MGI:5663074]	0.0014026
ENSMUSG00000090210	21.9531	1.95339	0.46763	4.17721	2.95e-05	0.00106776	Itga10	3	96552900	96571835	1	integrin, alpha 10 [Source:MGI Symbol;Acc:MGI:2153482]	0.00142351
ENSMUSG00000066621	3583.58	0.234229	0.056165	4.17037	3.04e-05	0.00109777	Tecpr1	5	144131260	144160433	-1	tectonin beta-propeller repeat containing 1 [Source:MGI Symbol;Acc:MGI:1917631]	0.00146358
ENSMUSG00000039131	57.6971	1.16256	0.279131	4.16495	3.11e-05	0.00112163	Gipc2	3	151799170	151871867	-1	GIPC PDZ domain containing family, member 2 [Source:MGI Symbol;Acc:MGI:1889209]	0.00149387
ENSMUSG00000024137	437.917	0.728805	0.175215	4.15949	3.19e-05	0.00114616	E4f1	17	24662752	24689287	-1	E4F transcription factor 1 [Source:MGI Symbol;Acc:MGI:109530]	0.0015288
ENSMUSG00000004562	2051.14	0.333762	0.0803607	4.1533	3.28e-05	0.0011714	Arhgef40	14	52222176	52243708	1	Rho guanine nucleotide exchange factor (GEF) 40 [Source:MGI Symbol;Acc:MGI:2685515]	0.00156127
ENSMUSG00000032959	8594.4	-0.201291	0.048468	-4.15307	3.28e-05	0.0011714	Pebp1	5	117420719	117425690	-1	phosphatidylethanolamine binding protein 1 [Source:MGI Symbol;Acc:MGI:1344408]	0.00156127
ENSMUSG00000085795	1022.78	0.358914	0.0864239	4.15295	3.28e-05	0.0011714	Zfp703	8	27467353	27471489	1	zinc finger protein 703 [Source:MGI Symbol;Acc:MGI:2662729]	0.00156127
ENSMUSG00000054199	1195.03	0.272126	0.0655382	4.15217	3.29e-05	0.00117271	Gon4l	3	88742538	88817410	1	gon-4-like (C.elegans) [Source:MGI Symbol;Acc:MGI:1917579]	0.00156249
ENSMUSG00000059201	7.20685	6.11746	1.47521	4.14685	3.37e-05	NA	Lep	6	29060219	29073876	1	leptin [Source:MGI Symbol;Acc:MGI:104663]	0.00159688
ENSMUSG00000031834	2156.72	0.318195	0.0767461	4.14607	3.38e-05	0.00120168	Pik3r2	8	71220820	71229357	-1	phosphoinositide-3-kinase regulatory subunit 2 [Source:MGI Symbol;Acc:MGI:1098772]	0.00159802
ENSMUSG00000018554	28.6598	1.99543	0.481509	4.14412	3.41e-05	0.00120919	Ybx2	11	69826622	69832431	1	Y box protein 2 [Source:MGI Symbol;Acc:MGI:1096372]	0.00160859
ENSMUSG00000089736	37.5494	2.30353	0.55602	4.14289	3.43e-05	0.00121297	Tgfbr3l	8	4298214	4301423	1	transforming growth factor, beta receptor III-like [Source:MGI Symbol;Acc:MGI:3833469]	0.0016144
ENSMUSG00000039148	1947.4	0.33954	0.0820005	4.14071	3.46e-05	0.00122184	Sart1	19	5427551	5438731	-1	squamous cell carcinoma antigen recognized by T cells 1 [Source:MGI Symbol;Acc:MGI:1309453]	0.00162489
ENSMUSG00000022263	3592.85	0.307455	0.0742711	4.13962	3.48e-05	0.00122488	Trio	15	27730737	28025934	-1	triple functional domain (PTPRF interacting) [Source:MGI Symbol;Acc:MGI:1927230]	0.00162807
ENSMUSG00000020069	635.515	0.547464	0.132267	4.13909	3.49e-05	0.00122488	Hnrnph3	10	62850443	62859996	-1	heterogeneous nuclear ribonucleoprotein H3 [Source:MGI Symbol;Acc:MGI:1926462]	0.00162807
ENSMUSG00000036309	21521.4	-0.220876	0.0533697	-4.1386	3.49e-05	0.00122488	Skp1	11	52122822	52137685	1	S-phase kinase-associated protein 1 [Source:MGI Symbol;Acc:MGI:103575]	0.00162807
ENSMUSG00000026788	340.482	0.656088	0.158558	4.13784	3.51e-05	0.00122619	Zbtb43	2	33340299	33358571	-1	zinc finger and BTB domain containing 43 [Source:MGI Symbol;Acc:MGI:1919084]	0.00163378
ENSMUSG00000026778	1951.38	-0.295596	0.0714751	-4.13565	3.54e-05	0.00123523	Prkcq	2	11176919	11306033	1	protein kinase C, theta [Source:MGI Symbol;Acc:MGI:97601]	0.00164411
ENSMUSG00000086844	63.762	1.11469	0.269594	4.13469	3.55e-05	0.00123763	B230206H07Rik	7	140939054	140945023	-1	RIKEN cDNA B230206H07 gene [Source:MGI Symbol;Acc:MGI:2444929]	0.00164512
ENSMUSG00000014355	2301.26	0.416494	0.100813	4.13137	3.61e-05	0.0012529	Anapc1	2	128452024	128529311	-1	anaphase promoting complex subunit 1 [Source:MGI Symbol;Acc:MGI:103097]	0.00166925
ENSMUSG00000041528	2436.38	0.282064	0.0682983	4.12989	3.63e-05	0.00125557	Rnf123	9	107928733	107960545	-1	ring finger protein 123 [Source:MGI Symbol;Acc:MGI:2148796]	0.00167115
ENSMUSG00000032712	347.555	0.489172	0.118447	4.12987	3.63e-05	0.00125557	Resf1	6	149210912	149237161	1	retroelement silencing factor 1 [Source:MGI Symbol;Acc:MGI:1914496]	0.00167115
ENSMUSG00000053552	595.584	0.420107	0.101765	4.12822	3.66e-05	0.00126185	Ebf4	2	130137089	130212401	1	early B cell factor 4 [Source:MGI Symbol;Acc:MGI:2385972]	0.00168128
ENSMUSG00000002949	874.252	0.426409	0.103382	4.12459	3.71e-05	0.00127722	Timm44	8	4309731	4325913	-1	translocase of inner mitochondrial membrane 44 [Source:MGI Symbol;Acc:MGI:1343262]	0.00170054
ENSMUSG00000020747	1582.45	0.444779	0.10784	4.12442	3.72e-05	0.00127722	Tmem94	11	115656259	115690192	1	transmembrane protein 94 [Source:MGI Symbol;Acc:MGI:1919197]	0.00170141
ENSMUSG00000074733	333.883	0.592936	0.144059	4.11594	3.86e-05	0.00132224	Zfp950	19	61042278	61129278	-1	zinc finger protein 950 [Source:MGI Symbol;Acc:MGI:2652824]	0.00176162
ENSMUSG00000030007	7889.35	-0.191012	0.0464143	-4.11536	3.87e-05	0.00132265	Cct7	6	85428496	85445457	1	chaperonin containing Tcp1, subunit 7 (eta) [Source:MGI Symbol;Acc:MGI:107184]	0.00176236
ENSMUSG00000026516	1001.42	1.10604	0.268976	4.11205	3.92e-05	0.00133889	Nvl	1	180914703	180971769	-1	nuclear VCP-like [Source:MGI Symbol;Acc:MGI:1914709]	0.00178127
ENSMUSG00000001909	1131.69	0.321026	0.0780956	4.11068	3.94e-05	0.00134391	Trmt1	8	85412936	85426437	1	tRNA methyltransferase 1 [Source:MGI Symbol;Acc:MGI:1289155]	0.0017865
ENSMUSG00000035161	426.581	0.725592	0.176537	4.11014	3.95e-05	0.00134418	Ints6	14	62913779	62998618	-1	integrator complex subunit 6 [Source:MGI Symbol;Acc:MGI:1202397]	0.00178718
ENSMUSG00000021198	366.962	0.543373	0.13229	4.10744	4e-05	0.00135706	Unc79	12	102915118	103150324	1	unc-79 homolog [Source:MGI Symbol;Acc:MGI:2684729]	0.00180592
ENSMUSG00000104033	30.9862	1.54084	0.375271	4.10594	4.03e-05	0.00136057	Gm37773	3	118319800	118321919	1	predicted gene, 37773 [Source:MGI Symbol;Acc:MGI:5611001]	0.00181169
ENSMUSG00000022568	621.622	0.791369	0.192755	4.10557	4.03e-05	0.00136057	Scrib	15	75919007	75941633	-1	scribbled planar cell polarity [Source:MGI Symbol;Acc:MGI:2145950]	0.00181169
ENSMUSG00000022194	1752.24	0.416015	0.101335	4.10535	4.04e-05	0.00136057	Pabpn1	14	55129957	55135626	1	poly(A) binding protein, nuclear 1 [Source:MGI Symbol;Acc:MGI:1859158]	0.00181231
ENSMUSG00000021701	926.154	0.430705	0.104984	4.10259	4.09e-05	0.00137397	Plk2	13	110531580	110537378	1	polo like kinase 2 [Source:MGI Symbol;Acc:MGI:1099790]	0.00183084
ENSMUSG00000031153	2987.82	0.238707	0.0582537	4.09771	4.17e-05	0.00139927	Gripap1	X	7656004	7686806	1	GRIP1 associated protein 1 [Source:MGI Symbol;Acc:MGI:1859616]	0.00186269
ENSMUSG00000014786	460.053	0.462244	0.112815	4.09738	4.18e-05	0.00139927	Slc9a5	8	106075475	106096513	1	solute carrier family 9 (sodium/hydrogen exchanger), member 5 [Source:MGI Symbol;Acc:MGI:2685542]	0.0018632
ENSMUSG00000019823	2148.68	0.432157	0.105489	4.09671	4.19e-05	0.00140032	Mical1	10	41352310	41363028	1	microtubule associated monooxygenase, calponin and LIM domain containing 1 [Source:MGI Symbol;Acc:MGI:2385847]	0.00186371
ENSMUSG00000095562	331.083	0.932445	0.227662	4.09575	4.21e-05	0.0014032	Erdr1	X	168792655	168802277	1	erythroid differentiation regulator 1 [Source:NCBI gene (formerly Entrezgene);Acc:170942]	0.00186865
ENSMUSG00000040415	2148.14	0.361514	0.0883882	4.09008	4.31e-05	0.00143492	Dtx3	10	127026247	127031597	-1	deltex 3, E3 ubiquitin ligase [Source:MGI Symbol;Acc:MGI:2135752]	0.00190901
ENSMUSG00000038535	518.771	0.40685	0.0995997	4.08485	4.41e-05	0.00146451	Zfp280d	9	72182142	72271059	1	zinc finger protein 280D [Source:MGI Symbol;Acc:MGI:2384583]	0.0019492
ENSMUSG00000031805	150.38	1.24563	0.305086	4.0829	4.45e-05	0.00147375	Jak3	8	72128940	72143219	1	Janus kinase 3 [Source:MGI Symbol;Acc:MGI:99928]	0.00196276
ENSMUSG00000038963	66.2157	1.09811	0.269033	4.08169	4.47e-05	0.00147835	Slco4a1	2	180098038	180116660	1	solute carrier organic anion transporter family, member 4a1 [Source:MGI Symbol;Acc:MGI:1351866]	0.00196745
ENSMUSG00000038301	4148.71	-0.221198	0.0542326	-4.07869	4.53e-05	0.00149436	Snx10	6	51500881	51567659	1	sorting nexin 10 [Source:MGI Symbol;Acc:MGI:1919232]	0.0019897
ENSMUSG00000031765	1067.32	0.43625	0.106991	4.07743	4.55e-05	0.00149933	Mt1	8	94905710	94906955	1	metallothionein 1 [Source:MGI Symbol;Acc:MGI:97171]	0.00199432
ENSMUSG00000002007	94.1203	1.48866	0.365165	4.07667	4.57e-05	0.00150114	Srpk3	X	72818011	72822531	1	serine/arginine-rich protein specific kinase 3 [Source:MGI Symbol;Acc:MGI:1891338]	0.00199892
ENSMUSG00000024566	3016.48	0.229863	0.0564011	4.07552	4.59e-05	0.00150545	Atp9b	18	80777356	80977275	-1	ATPase, class II, type 9B [Source:MGI Symbol;Acc:MGI:1354757]	0.00200351
ENSMUSG00000020719	12531.1	0.201639	0.0495108	4.07263	4.65e-05	0.00151929	Ddx5	11	106671181	106680011	-1	DEAD box helicase 5 [Source:MGI Symbol;Acc:MGI:105037]	0.00202131
ENSMUSG00000038914	1186.33	0.335831	0.0824647	4.07242	4.65e-05	0.00151929	Dido1	2	180299757	180351792	-1	death inducer-obliterator 1 [Source:MGI Symbol;Acc:MGI:1344352]	0.00202131
ENSMUSG00000083282	1241.39	0.299184	0.0735736	4.06647	4.77e-05	0.00155538	Ctsf	19	4905158	4910946	1	cathepsin F [Source:MGI Symbol;Acc:MGI:1861434]	0.0020692
ENSMUSG00000041084	924.006	-0.311203	0.0766001	-4.0627	4.85e-05	0.00157742	Ostc	3	130489561	130503093	-1	oligosaccharyltransferase complex subunit (non-catalytic) [Source:MGI Symbol;Acc:MGI:1913607]	0.00209957
ENSMUSG00000079523	14241.8	-0.20514	0.0505836	-4.05546	5e-05	0.00162372	Tmsb10	6	72934330	72935731	-1	thymosin, beta 10 [Source:MGI Symbol;Acc:MGI:109146]	0.00216006
ENSMUSG00000022994	571.145	0.566079	0.139649	4.05359	5.04e-05	0.00163339	Adcy6	15	98487854	98507957	-1	adenylate cyclase 6 [Source:MGI Symbol;Acc:MGI:87917]	0.00217288
ENSMUSG00000028692	12057.5	-0.172789	0.0426687	-4.04954	5.13e-05	0.00165852	Akr1a1	4	116493707	116508877	-1	aldo-keto reductase family 1, member A1 (aldehyde reductase) [Source:MGI Symbol;Acc:MGI:1929955]	0.00220716
ENSMUSG00000029465	2497.78	-0.233044	0.0576028	-4.0457	5.22e-05	0.00168136	Arpc3	5	122529941	122552247	1	actin related protein 2/3 complex, subunit 3 [Source:MGI Symbol;Acc:MGI:1928375]	0.00223673
ENSMUSG00000028876	203.423	0.612321	0.151363	4.04538	5.22e-05	0.00168136	Epha10	4	124774692	124811593	1	Eph receptor A10 [Source:MGI Symbol;Acc:MGI:3586824]	0.00223673
ENSMUSG00000005566	2076.87	0.297211	0.0735296	4.04206	5.3e-05	0.00170189	Trim28	7	12733041	12764962	1	tripartite motif-containing 28 [Source:MGI Symbol;Acc:MGI:109274]	0.0022664
ENSMUSG00000021327	454.961	0.466359	0.115496	4.0379	5.39e-05	0.0017288	Zkscan3	13	21571173	21586925	-1	zinc finger with KRAB and SCAN domains 3 [Source:MGI Symbol;Acc:MGI:1919989]	0.00230021
ENSMUSG00000083012	14.996	4.79219	1.188	4.03381	5.49e-05	0.00175557	Fam220a	5	143534463	143550286	1	family with sequence similarity 220, member A [Source:MGI Symbol;Acc:MGI:1914488]	0.00233814
ENSMUSG00000036398	1583.74	-0.3444	0.0853942	-4.03306	5.51e-05	0.00175763	Ppp1r11	17	37259248	37262633	-1	protein phosphatase 1, regulatory inhibitor subunit 11 [Source:MGI Symbol;Acc:MGI:1923747]	0.00234192
ENSMUSG00000019734	51.8234	1.31478	0.326075	4.03213	5.53e-05	0.001761	Tmc4	7	3668789	3680552	-1	transmembrane channel-like gene family 4 [Source:MGI Symbol;Acc:MGI:2669035]	0.00234568
ENSMUSG00000020863	1940.12	0.32834	0.0814756	4.02992	5.58e-05	0.00177409	Luc7l3	11	94178716	94212814	-1	LUC7-like 3 (S. cerevisiae) [Source:MGI Symbol;Acc:MGI:1914934]	0.00236213
ENSMUSG00000057894	494.426	0.54145	0.134636	4.02159	5.78e-05	0.00183435	Zfp329	7	12538904	12552785	-1	zinc finger protein 329 [Source:MGI Symbol;Acc:MGI:1921283]	0.00244188
ENSMUSG00000067629	746.355	0.653987	0.162809	4.01691	5.9e-05	0.00186737	Syngap1	17	27160227	27191408	1	synaptic Ras GTPase activating protein 1 homolog (rat) [Source:MGI Symbol;Acc:MGI:3039785]	0.00248758
ENSMUSG00000042726	1234.01	0.357401	0.0890622	4.01294	6e-05	0.00189524	Trafd1	5	121509788	121523695	-1	TRAF type zinc finger domain containing 1 [Source:MGI Symbol;Acc:MGI:1923551]	0.00252468
ENSMUSG00000063480	1619.27	-0.256424	0.0639133	-4.01206	6.02e-05	0.00189847	Snu13	15	81924726	81931799	-1	SNU13 homolog, small nuclear ribonucleoprotein (U4/U6.U5) [Source:MGI Symbol;Acc:MGI:893586]	0.00252804
ENSMUSG00000022098	664.366	0.629846	0.157298	4.00417	6.22e-05	0.00195908	Bmp1	14	70711998	70757674	-1	bone morphogenetic protein 1 [Source:MGI Symbol;Acc:MGI:88176]	0.00260682
ENSMUSG00000063558	2415.41	0.304326	0.0761221	3.99787	6.39e-05	0.00200794	Aox1	1	58069090	58145572	1	aldehyde oxidase 1 [Source:MGI Symbol;Acc:MGI:88035]	0.00267275
ENSMUSG00000041697	5219.27	-0.233634	0.0584768	-3.99532	6.46e-05	0.00202557	Cox6a1	5	115483701	115487040	-1	cytochrome c oxidase subunit 6A1 [Source:MGI Symbol;Acc:MGI:103099]	0.00269667
ENSMUSG00000075569	21.1735	2.0579	0.515878	3.98911	6.63e-05	0.00207522	Rsph10b	5	143869853	143922537	1	radial spoke head 10 homolog B (Chlamydomonas) [Source:MGI Symbol;Acc:MGI:1922386]	0.00276215
ENSMUSG00000035172	694.367	0.451158	0.113177	3.9863	6.71e-05	0.00209225	Plekhh3	11	101053505	101062177	-1	pleckstrin homology domain containing, family H (with MyTH4 domain) member 3 [Source:MGI Symbol;Acc:MGI:2384950]	0.00278445
ENSMUSG00000034820	1301.24	0.304894	0.0764868	3.98623	6.71e-05	0.00209225	Cpsf7	19	10502630	10525017	1	cleavage and polyadenylation specific factor 7 [Source:MGI Symbol;Acc:MGI:1917826]	0.00278445
ENSMUSG00000007041	2447.97	-0.237288	0.0595925	-3.98184	6.84e-05	0.00212705	Clic1	17	35268942	35277725	1	chloride intracellular channel 1 [Source:MGI Symbol;Acc:MGI:2148924]	0.00283281
ENSMUSG00000020700	425.709	0.393128	0.0987499	3.98105	6.86e-05	0.00212994	Map3k3	11	105975439	106046272	1	mitogen-activated protein kinase kinase kinase 3 [Source:MGI Symbol;Acc:MGI:1346874]	0.00283551
ENSMUSG00000057897	2182.68	0.275492	0.0692189	3.98001	6.89e-05	0.00213511	Camk2b	11	5919644	6016362	-1	calcium/calmodulin-dependent protein kinase II, beta [Source:MGI Symbol;Acc:MGI:88257]	0.00284233
ENSMUSG00000063297	3444.98	-0.203133	0.0510523	-3.97891	6.92e-05	0.00214074	Luzp2	7	54485246	54918633	1	leucine zipper protein 2 [Source:MGI Symbol;Acc:MGI:1889615]	0.00284912
ENSMUSG00000004565	3129.32	0.293521	0.0737839	3.97811	6.95e-05	0.00214372	Pnpla6	8	3565384	3594267	1	patatin-like phospholipase domain containing 6 [Source:MGI Symbol;Acc:MGI:1354723]	0.00285588
ENSMUSG00000086859	130.221	1.04305	0.262477	3.97389	7.07e-05	0.00217783	Snhg20	11	116966834	116969781	1	small nucleolar RNA host gene 20 [Source:MGI Symbol;Acc:MGI:1924222]	0.00289953
ENSMUSG00000096687	197.821	0.559483	0.140827	3.97285	7.1e-05	0.00218312	Mfsd4b4	10	39766009	39775234	-1	major facilitator superfamily domain containing 4B4 [Source:MGI Symbol;Acc:MGI:3035041]	0.00290617
ENSMUSG00000011751	3224.96	0.20518	0.0516746	3.97062	7.17e-05	0.00219934	Sptbn4	7	27055808	27147111	-1	spectrin beta, non-erythrocytic 4 [Source:MGI Symbol;Acc:MGI:1890574]	0.00292912
ENSMUSG00000028582	2021.37	0.299963	0.0755947	3.96804	7.25e-05	0.00221612	Cc2d1b	4	108477137	108491320	1	coiled-coil and C2 domain containing 1B [Source:MGI Symbol;Acc:MGI:2443076]	0.00295277
ENSMUSG00000020635	3565.01	-0.215446	0.0543037	-3.96743	7.27e-05	0.00221612	Fkbp1b	12	4883174	4891591	-1	FK506 binding protein 1b [Source:MGI Symbol;Acc:MGI:1336205]	0.00295277
ENSMUSG00000027936	1046.32	0.333708	0.0841121	3.96742	7.27e-05	0.00221612	Crtc2	3	90161470	90171432	1	CREB regulated transcription coactivator 2 [Source:MGI Symbol;Acc:MGI:1921593]	0.00295277
ENSMUSG00000040940	1719.62	0.888293	0.22415	3.96293	7.4e-05	0.00225382	Arhgef1	7	24602337	24626019	1	Rho guanine nucleotide exchange factor (GEF) 1 [Source:MGI Symbol;Acc:MGI:1353510]	0.00299978
ENSMUSG00000028962	3671.02	0.346004	0.0873783	3.95984	7.5e-05	0.00227884	Slc4a2	5	24628835	24645948	1	solute carrier family 4 (anion exchanger), member 2 [Source:MGI Symbol;Acc:MGI:109351]	0.00303447
ENSMUSG00000113328	55.111	2.16907	0.548425	3.95509	7.65e-05	0.00232013	Gm47260	12	103378751	103381855	-1	predicted gene, 47260 [Source:MGI Symbol;Acc:MGI:6096093]	0.00308922
ENSMUSG00000034684	1475.01	0.313804	0.0794236	3.95101	7.78e-05	0.00235543	Sema3f	9	107558699	107587674	-1	sema domain, immunoglobulin domain (Ig), short basic domain, secreted, (semaphorin) 3F [Source:MGI Symbol;Acc:MGI:1096347]	0.0031357
ENSMUSG00000014846	36676.7	-0.186183	0.0471332	-3.95015	7.81e-05	0.00235939	Tppp3	8	106194125	106198158	-1	tubulin polymerization-promoting protein family member 3 [Source:MGI Symbol;Acc:MGI:1915221]	0.00314177
ENSMUSG00000021219	1562.21	0.342229	0.0866482	3.94964	7.83e-05	0.00235993	Rgs6	12	82635066	83208830	1	regulator of G-protein signaling 6 [Source:MGI Symbol;Acc:MGI:1354730]	0.0031438
ENSMUSG00000007783	2156.19	0.228549	0.0579524	3.94374	8.02e-05	0.00241411	Cpt1c	7	44608796	44624275	-1	carnitine palmitoyltransferase 1c [Source:MGI Symbol;Acc:MGI:2446526]	0.00321396
ENSMUSG00000035545	3212.11	1.86263	0.472905	3.9387	8.19e-05	0.00246065	Leng8	7	4140038	4151176	1	leukocyte receptor cluster (LRC) member 8 [Source:MGI Symbol;Acc:MGI:2142195]	0.00327584
ENSMUSG00000027374	1223.03	0.345881	0.0879049	3.93472	8.33e-05	0.00249704	Mrps5	2	127429142	127448749	1	mitochondrial ribosomal protein S5 [Source:MGI Symbol;Acc:MGI:1924971]	0.00332552
ENSMUSG00000050334	159.574	0.758578	0.192904	3.93242	8.41e-05	0.00251632	C130071C03Rik	13	83869500	84032313	1	RIKEN cDNA C130071C03 gene [Source:MGI Symbol;Acc:MGI:2443574]	0.0033511
ENSMUSG00000037742	38344.7	-0.22216	0.0565099	-3.93135	8.45e-05	0.00252275	Eef1a1	9	78385731	78396433	-1	eukaryotic translation elongation factor 1 alpha 1 [Source:MGI Symbol;Acc:MGI:1096881]	0.00336067
ENSMUSG00000001151	583.082	0.385997	0.0983734	3.9238	8.72e-05	0.00259825	Pcnt	10	76187097	76278620	-1	pericentrin (kendrin) [Source:MGI Symbol;Acc:MGI:102722]	0.00346151
ENSMUSG00000102752	64.9063	1.21748	0.310495	3.9211	8.81e-05	0.00262255	Gm7694	1	170125768	170133901	-1	predicted gene 7694 [Source:MGI Symbol;Acc:MGI:3649135]	0.00349065
ENSMUSG00000020888	179.256	0.728849	0.186046	3.91758	8.94e-05	0.00265605	Dvl2	11	69891421	69903127	1	dishevelled segment polarity protein 2 [Source:MGI Symbol;Acc:MGI:106613]	0.0035355
ENSMUSG00000029009	1359.29	0.433726	0.110755	3.91609	9e-05	0.00266758	Mthfr	4	148123534	148144008	1	methylenetetrahydrofolate reductase [Source:MGI Symbol;Acc:MGI:106639]	0.00355255
ENSMUSG00000114253	13.363	2.46562	0.630096	3.91308	9.11e-05	0.00269588	Gm47798	14	6161997	6165811	-1	predicted gene, 47798 [Source:MGI Symbol;Acc:MGI:6096974]	0.00358924
ENSMUSG00000085527	33.8503	1.69518	0.433925	3.90661	9.36e-05	0.00276396	Gm15535	3	85463353	85481252	-1	predicted gene 15535 [Source:MGI Symbol;Acc:MGI:3782983]	0.00368084
ENSMUSG00000024188	1716.87	0.276835	0.0709321	3.90282	9.51e-05	0.00280229	Luc7l	17	26471870	26504478	1	Luc7-like [Source:MGI Symbol;Acc:MGI:1914228]	0.00373285
ENSMUSG00000042625	1056.8	1.28723	0.33029	3.89729	9.73e-05	0.00286171	Safb2	17	56867965	56891585	-1	scaffold attachment factor B2 [Source:MGI Symbol;Acc:MGI:2146808]	0.00381209
ENSMUSG00000025409	1328.79	1.0097	0.259298	3.89396	9.86e-05	0.00289584	Mbd6	10	127117825	127124887	-1	methyl-CpG binding domain protein 6 [Source:MGI Symbol;Acc:MGI:106378]	0.00385585
ENSMUSG00000001632	645.63	0.361598	0.0929147	3.89172	9.95e-05	0.00291729	Brpf1	6	113284098	113301821	1	bromodomain and PHD finger containing, 1 [Source:MGI Symbol;Acc:MGI:1926033]	0.00388382
ENSMUSG00000112530	25.8489	1.71924	0.442025	3.88945	0.000100471	0.00293924	Gm47738	10	53445765	53447678	1	predicted gene, 47738 [Source:MGI Symbol;Acc:MGI:6096879]	0.00391446
ENSMUSG00000035199	4435.16	-0.195874	0.0503751	-3.88831	0.000100946	0.00294402	Arl6ip5	6	97187650	97210276	1	ADP-ribosylation factor-like 6 interacting protein 5 [Source:MGI Symbol;Acc:MGI:1929501]	0.00392089
ENSMUSG00000021268	34336.2	2.31493	0.595427	3.88785	0.000101135	0.00294402	Meg3	12	109506884	109538160	1	maternally expressed 3 [Source:MGI Symbol;Acc:MGI:1202886]	0.00392089
ENSMUSG00000025199	620.23	0.573601	0.147542	3.88771	0.000101195	0.00294402	Chuk	19	44061774	44095919	-1	conserved helix-loop-helix ubiquitous kinase [Source:MGI Symbol;Acc:MGI:99484]	0.00392089
ENSMUSG00000038705	429.66	0.433525	0.111543	3.8866	0.000101657	0.00295199	Gmeb2	2	180893242	180929828	-1	glucocorticoid modulatory element binding protein 2 [Source:MGI Symbol;Acc:MGI:2652836]	0.00393155
ENSMUSG00000020857	1597.61	-0.39861	0.102644	-3.88343	0.000102993	0.00298436	Nme2	11	93840640	93847085	-1	NME/NM23 nucleoside diphosphate kinase 2 [Source:MGI Symbol;Acc:MGI:97356]	0.00397471
ENSMUSG00000038658	537.574	0.448473	0.115495	3.88306	0.000103151	0.00298436	Ric1	19	29499682	29584229	1	RAB6A GEF complex partner 1 [Source:MGI Symbol;Acc:MGI:1924893]	0.00397471
ENSMUSG00000029524	184.359	0.85393	0.220426	3.874	0.000107062	0.00309183	Sirt4	5	115616069	115622784	-1	sirtuin 4 [Source:MGI Symbol;Acc:MGI:1922637]	0.00411787
ENSMUSG00000034248	547.086	0.490711	0.126685	3.87348	0.000107291	0.00309276	Slc25a37	14	69479297	69522561	-1	solute carrier family 25, member 37 [Source:MGI Symbol;Acc:MGI:1914962]	0.00411915
ENSMUSG00000092341	10468.4	1.57648	0.4071	3.87247	0.000107737	0.00309994	Malat1	19	5845718	5852700	-1	metastasis associated lung adenocarcinoma transcript 1 (non-coding RNA) [Source:MGI Symbol;Acc:MGI:1919539]	0.00412874
ENSMUSG00000017390	6569.39	-0.186362	0.0481381	-3.8714	0.00010821	0.00310788	Aldoc	11	78213794	78218607	1	aldolase C, fructose-bisphosphate [Source:MGI Symbol;Acc:MGI:101863]	0.00413933
ENSMUSG00000023175	10313	-0.188251	0.0486355	-3.87066	0.000108543	0.00311177	Bsg	10	79540325	79547803	1	basigin [Source:MGI Symbol;Acc:MGI:88208]	0.00414453
ENSMUSG00000029474	1044.63	-0.405496	0.10482	-3.86849	0.000109511	0.00313381	Rnf34	5	122988111	123009354	1	ring finger protein 34 [Source:MGI Symbol;Acc:MGI:2153340]	0.00417392
ENSMUSG00000026213	907.273	0.534601	0.138472	3.86072	0.000113055	0.00322936	Stk11ip	1	75498173	75513979	1	serine/threonine kinase 11 interacting protein [Source:MGI Symbol;Acc:MGI:1918978]	0.0043012
ENSMUSG00000021819	3551.53	0.403817	0.10463	3.85949	0.000113623	0.0032397	Zswim8	14	20757620	20773687	1	zinc finger SWIM-type containing 8 [Source:MGI Symbol;Acc:MGI:1919156]	0.00431501
ENSMUSG00000025982	4401.27	0.284251	0.0737357	3.855	0.00011573	0.0032938	Sf3b1	1	55024328	55066640	-1	splicing factor 3b, subunit 1 [Source:MGI Symbol;Acc:MGI:1932339]	0.00438711
ENSMUSG00000019763	516.645	0.55063	0.143068	3.84874	0.000118726	0.00337297	Rmnd1	10	4351915	4382388	-1	required for meiotic nuclear division 1 homolog [Source:MGI Symbol;Acc:MGI:1913334]	0.00449258
ENSMUSG00000078349	255.548	0.960826	0.249826	3.84598	0.00012007	0.00340501	AW011738	4	156287727	156295020	1	expressed sequence AW011738 [Source:MGI Symbol;Acc:MGI:2140540]	0.00453528
ENSMUSG00000001248	2553.18	0.293565	0.0763802	3.84346	0.000121311	0.00343402	Gramd1a	7	30829552	30855321	-1	GRAM domain containing 1A [Source:MGI Symbol;Acc:MGI:105490]	0.00457395
ENSMUSG00000026803	207.841	0.646778	0.168614	3.83584	0.000125134	0.00353588	Ttf1	2	28950274	28977668	1	transcription termination factor, RNA polymerase I [Source:MGI Symbol;Acc:MGI:105044]	0.00470965
ENSMUSG00000051579	718.277	-0.339456	0.0885063	-3.83538	0.000125368	0.00353615	Tceal8	X	135069733	135073091	-1	transcription elongation factor A (SII)-like 8 [Source:MGI Symbol;Acc:MGI:1913934]	0.00471003
ENSMUSG00000019143	510.907	0.52039	0.135776	3.8327	0.000126747	0.00356863	Hars2	18	36916061	36925615	1	histidyl-tRNA synthetase 2 [Source:MGI Symbol;Acc:MGI:1918041]	0.00475335
ENSMUSG00000026042	646.433	0.515701	0.134737	3.82745	0.000129476	0.00363898	Col5a2	1	45413481	45542442	-1	collagen, type V, alpha 2 [Source:MGI Symbol;Acc:MGI:88458]	0.00484706
ENSMUSG00000034543	931.957	0.34267	0.0895693	3.82575	0.000130374	0.00365129	Morc2a	11	3599191	3640477	1	microrchidia 2A [Source:MGI Symbol;Acc:MGI:1921772]	0.00486352
ENSMUSG00000038650	1693.69	-0.281801	0.0736591	-3.82574	0.000130378	0.00365129	Rnh1	7	140740239	140752770	-1	ribonuclease/angiogenin inhibitor 1 [Source:MGI Symbol;Acc:MGI:1195456]	0.00486352
ENSMUSG00000021916	716.15	0.384802	0.100653	3.82306	0.000131804	0.00368465	Glt8d1	14	30723357	30733948	1	glycosyltransferase 8 domain containing 1 [Source:MGI Symbol;Acc:MGI:1923735]	0.00490801
ENSMUSG00000060803	2674.9	-0.226319	0.0592426	-3.8202	0.000133341	0.00372101	Gstp1	19	4085407	4087985	-1	glutathione S-transferase, pi 1 [Source:MGI Symbol;Acc:MGI:95865]	0.00495647
ENSMUSG00000103928	20.6661	2.34923	0.61507	3.81945	0.000133747	0.00372574	Gm37893	1	151321056	151323492	1	predicted gene, 37893 [Source:MGI Symbol;Acc:MGI:5611121]	0.00496279
ENSMUSG00000035266	178.667	0.849789	0.222648	3.81674	0.000135228	0.00376033	Helq	5	100910011	100946464	-1	helicase, POLQ-like [Source:MGI Symbol;Acc:MGI:2176740]	0.00500891
ENSMUSG00000059981	3152.81	0.222397	0.058293	3.81515	0.0001361	0.00377791	Taok2	7	126464850	126483875	-1	TAO kinase 2 [Source:MGI Symbol;Acc:MGI:1915919]	0.00503235
ENSMUSG00000049775	18018.2	-0.307808	0.0807439	-3.81215	0.000137763	0.00381734	Tmsb4x	X	165990089	165992311	-1	thymosin, beta 4, X chromosome [Source:MGI Symbol;Acc:MGI:99510]	0.0050849
ENSMUSG00000017167	9578.81	0.240599	0.0631312	3.81109	0.000138353	0.00382696	Cntnap1	11	101061349	101081550	1	contactin associated protein-like 1 [Source:MGI Symbol;Acc:MGI:1858201]	0.00509774
ENSMUSG00000041548	8071.14	-0.175707	0.0461114	-3.81048	0.000138696	0.00382971	Hspb8	5	116546550	116560923	-1	heat shock protein 8 [Source:MGI Symbol;Acc:MGI:2135756]	0.00510144
ENSMUSG00000039110	123.926	0.923789	0.24247	3.8099	0.00013902	0.00383194	Mycbpap	11	94392173	94412568	-1	MYCBP associated protein [Source:MGI Symbol;Acc:MGI:2388726]	0.00510444
ENSMUSG00000048677	143.464	0.73577	0.193151	3.8093	0.000139363	0.00383467	Tpcn2	7	144740261	144837748	-1	two pore segment channel 2 [Source:MGI Symbol;Acc:MGI:2385297]	0.00510812
ENSMUSG00000028093	150.379	0.808049	0.2122	3.80796	0.000140118	0.00384873	Acp6	3	97066093	97084615	1	acid phosphatase 6, lysophosphatidic [Source:MGI Symbol;Acc:MGI:1931010]	0.00512686
ENSMUSG00000020439	237.511	0.691481	0.181715	3.8053	0.00014163	0.00388348	Smtn	11	3467523	3490612	-1	smoothelin [Source:MGI Symbol;Acc:MGI:1354727]	0.00517318
ENSMUSG00000031392	1261.98	0.418579	0.110042	3.8038	0.000142491	0.00389383	Irak1	X	73057520	73067524	-1	interleukin-1 receptor-associated kinase 1 [Source:MGI Symbol;Acc:MGI:107420]	0.00518702
ENSMUSG00000025571	1145.98	0.372054	0.0978116	3.80378	0.000142502	0.00389383	Tnrc6c	11	117545115	117654265	1	trinucleotide repeat containing 6C [Source:MGI Symbol;Acc:MGI:2443265]	0.00518702
ENSMUSG00000028028	217.461	0.53434	0.140567	3.80131	0.000143932	0.00392608	Alpk1	3	127463959	127574176	-1	alpha-kinase 1 [Source:MGI Symbol;Acc:MGI:1918731]	0.00523003
ENSMUSG00000040385	4228.4	-0.209232	0.0550561	-3.80035	0.000144494	0.00393346	Ppp1ca	19	4242064	4245419	1	protein phosphatase 1 catalytic subunit alpha [Source:MGI Symbol;Acc:MGI:103016]	0.00523994
ENSMUSG00000021423	1605.79	-0.444706	0.117028	-3.79999	0.000144703	0.00393346	Ly86	13	37529184	37603012	1	lymphocyte antigen 86 [Source:MGI Symbol;Acc:MGI:1321404]	0.00523994
ENSMUSG00000015748	372.9	0.522829	0.137677	3.7975	0.000146164	0.00396633	Prpf3	3	95737436	95763197	-1	pre-mRNA processing factor 3 [Source:MGI Symbol;Acc:MGI:1918017]	0.00528375
ENSMUSG00000052911	454.106	0.621668	0.16374	3.79668	0.000146646	0.00396887	Lamb2	9	108356935	108367729	1	laminin, beta 2 [Source:MGI Symbol;Acc:MGI:99916]	0.0052872
ENSMUSG00000042564	49.8938	1.20555	0.317543	3.79649	0.000146762	0.00396887	Fam227a	15	79493777	79543157	-1	family with sequence similarity 227, member A [Source:MGI Symbol;Acc:MGI:1922979]	0.0052872
ENSMUSG00000024006	493.14	1.29342	0.34079	3.79535	0.000147433	0.00398019	Stk38	17	29189854	29226969	-1	serine/threonine kinase 38 [Source:MGI Symbol;Acc:MGI:2442572]	0.0053023
ENSMUSG00000027981	463.611	1.24003	0.326864	3.79371	0.000148413	0.0039966	Rnpc3	3	113398716	113423798	-1	RNA-binding region (RNP1, RRM) containing 3 [Source:MGI Symbol;Acc:MGI:1914475]	0.00532426
ENSMUSG00000056492	659.477	-0.33871	0.0892933	-3.79323	0.000148702	0.0039966	Adgrf5	17	43671342	43770448	1	adhesion G protein-coupled receptor F5 [Source:MGI Symbol;Acc:MGI:2182928]	0.00532426
ENSMUSG00000039205	994.256	0.499918	0.131798	3.79306	0.000148803	0.0039966	Ciz1	2	32242339	32270982	1	CDKN1A interacting zinc finger protein 1 [Source:MGI Symbol;Acc:MGI:1920234]	0.00532426
ENSMUSG00000004032	1873.42	-0.241296	0.0636365	-3.79178	0.000149571	0.00401038	Gstm5	3	107803137	107806002	1	glutathione S-transferase, mu 5 [Source:MGI Symbol;Acc:MGI:1309466]	0.00534266
ENSMUSG00000015932	5391.63	-0.213871	0.0564108	-3.79132	0.000149849	0.004011	Dstn	2	143757240	143785244	1	destrin [Source:MGI Symbol;Acc:MGI:1929270]	0.00534351
ENSMUSG00000004931	493.952	0.546005	0.144038	3.79071	0.000150216	0.004014	Apba3	10	81102794	81109080	1	amyloid beta (A4) precursor protein-binding, family A, member 3 [Source:MGI Symbol;Acc:MGI:1888527]	0.00534754
ENSMUSG00000048537	1220.6	0.335311	0.0884714	3.79005	0.000150615	0.00401786	Phldb1	9	44597601	44646495	-1	pleckstrin homology like domain, family B, member 1 [Source:MGI Symbol;Acc:MGI:2143230]	0.00535268
ENSMUSG00000022529	285.487	0.524088	0.138301	3.78948	0.00015096	0.00402025	Zfp263	16	3561957	3568654	1	zinc finger protein 263 [Source:MGI Symbol;Acc:MGI:1921370]	0.0053559
ENSMUSG00000035711	85.3418	1.2016	0.317238	3.78768	0.000152062	0.00404276	Dok3	13	55671044	55677109	-1	docking protein 3 [Source:MGI Symbol;Acc:MGI:1351490]	0.00538591
ENSMUSG00000116560	135.795	0.768334	0.202998	3.78493	0.000153751	0.00408077	Gm2808	17	6779190	6796112	-1	predicted gene 2808 [Source:MGI Symbol;Acc:MGI:3780977]	0.00543658
ENSMUSG00000097545	1212.04	2.24418	0.593256	3.78281	0.000155065	0.00410809	Mir124a-1hg	14	64824780	64831410	1	Mir124-1 host gene (non-protein coding) [Source:MGI Symbol;Acc:MGI:2442197]	0.00547307
ENSMUSG00000024851	2040.39	0.237857	0.0628846	3.78243	0.000155303	0.00410809	Pitpnm1	19	4149998	4163965	1	phosphatidylinositol transfer protein, membrane-associated 1 [Source:MGI Symbol;Acc:MGI:1197524]	0.00547307
ENSMUSG00000058392	229.254	0.711855	0.18839	3.77863	0.000157691	0.00416427	Rrp1b	17	32255074	32281839	1	ribosomal RNA processing 1B [Source:MGI Symbol;Acc:MGI:1919712]	0.00554793
ENSMUSG00000027108	2695.11	-0.20771	0.054976	-3.7782	0.000157965	0.00416451	Ola1	2	72923145	73049268	-1	Obg-like ATPase 1 [Source:MGI Symbol;Acc:MGI:1914309]	0.00554829
ENSMUSG00000033790	854.253	0.380103	0.100639	3.77691	0.000158784	0.00417911	Tubgcp5	7	55443902	55481425	1	tubulin, gamma complex associated protein 5 [Source:MGI Symbol;Acc:MGI:2178836]	0.00556776
ENSMUSG00000089832	308.615	0.613882	0.16275	3.77193	0.000161991	0.00425638	Shkbp1	7	27041558	27055444	-1	Sh3kbp1 binding protein 1 [Source:MGI Symbol;Acc:MGI:2385803]	0.00567076
ENSMUSG00000038683	3021.91	-0.248651	0.0659985	-3.76752	0.000164879	0.00432505	Pak1ip1	13	41154499	41166491	1	PAK1 interacting protein 1 [Source:MGI Symbol;Acc:MGI:1915333]	0.00576227
ENSMUSG00000022661	1550.53	-0.307427	0.0816152	-3.76679	0.000165362	0.0043305	Cd200	16	45202498	45229416	-1	CD200 antigen [Source:MGI Symbol;Acc:MGI:1196990]	0.00576957
ENSMUSG00000031950	5665.98	-0.404481	0.107424	-3.76527	0.00016637	0.00434686	Gabarapl2	8	112667335	112680244	1	gamma-aminobutyric acid (GABA) A receptor-associated protein-like 2 [Source:MGI Symbol;Acc:MGI:1890602]	0.00579143
ENSMUSG00000024959	718.686	-0.327612	0.0870148	-3.76502	0.000166539	0.00434686	Bad	19	6919229	6929267	1	BCL2-associated agonist of cell death [Source:MGI Symbol;Acc:MGI:1096330]	0.00579143
ENSMUSG00000012114	1690.33	0.27809	0.0739554	3.76023	0.000169754	0.00442345	Med15	16	17469072	17550755	-1	mediator complex subunit 15 [Source:MGI Symbol;Acc:MGI:2137379]	0.00589349
ENSMUSG00000025478	705.266	0.35992	0.0957671	3.75828	0.000171084	0.00445073	Dpysl4	7	138665917	138682620	1	dihydropyrimidinase-like 4 [Source:MGI Symbol;Acc:MGI:1349764]	0.00592988
ENSMUSG00000030666	2317.03	-0.256678	0.0683412	-3.75583	0.000172766	0.00448708	Calcb	7	114317878	114322600	1	calcitonin-related polypeptide, beta [Source:MGI Symbol;Acc:MGI:2151254]	0.00597833
ENSMUSG00000085894	20.8025	1.86957	0.498124	3.75321	0.000174582	0.00452678	Gm15832	1	39586651	39591083	-1	predicted gene 15832 [Source:MGI Symbol;Acc:MGI:3834078]	0.00603125
ENSMUSG00000023007	1205.15	0.442263	0.117933	3.75012	0.000176752	0.00457549	Prpf40b	15	99192968	99214899	1	pre-mRNA processing factor 40B [Source:MGI Symbol;Acc:MGI:1925583]	0.00609621
ENSMUSG00000025499	2391.29	-0.195197	0.0520574	-3.74965	0.000177082	0.0045765	Hras	7	140769018	140773918	-1	Harvey rat sarcoma virus oncogene [Source:MGI Symbol;Acc:MGI:96224]	0.00609759
ENSMUSG00000040860	355.549	0.874113	0.233147	3.74919	0.000177407	0.00457738	Crocc	4	140743948	140787861	-1	ciliary rootlet coiled-coil, rootletin [Source:MGI Symbol;Acc:MGI:3529431]	0.0060988
ENSMUSG00000039697	7443.27	-0.171563	0.0457871	-3.74696	0.000178988	0.00461062	Ncoa7	10	30504995	30679322	-1	nuclear receptor coactivator 7 [Source:MGI Symbol;Acc:MGI:2444847]	0.00614311
ENSMUSG00000022816	74683.8	-0.164305	0.043903	-3.74244	0.00018224	0.00467975	Fstl1	16	37597235	37656876	1	follistatin-like 1 [Source:MGI Symbol;Acc:MGI:102793]	0.00623528
ENSMUSG00000090386	66.1464	0.954781	0.255125	3.74241	0.000182266	0.00467975	Mir99ahg	16	77033205	77570315	1	Mir99a and Mirlet7c-1 host gene (non-protein coding) [Source:MGI Symbol;Acc:MGI:1919929]	0.00623528
ENSMUSG00000001082	390.559	0.706457	0.189028	3.73731	0.000186	0.00476783	Mfsd10	5	34790986	34794556	-1	major facilitator superfamily domain containing 10 [Source:MGI Symbol;Acc:MGI:1915544]	0.00635269
ENSMUSG00000007030	4186.08	0.283611	0.0759184	3.73574	0.000187165	0.00478687	Vwa7	17	35235555	35245717	1	von Willebrand factor A domain containing 7 [Source:MGI Symbol;Acc:MGI:1306798]	0.00637815
ENSMUSG00000028832	6420.72	-0.263717	0.0706003	-3.73535	0.000187453	0.00478687	Stmn1	4	134195631	134201154	1	stathmin 1 [Source:MGI Symbol;Acc:MGI:96739]	0.00637815
ENSMUSG00000026193	455.212	0.694631	0.185975	3.73508	0.000187655	0.00478687	Fn1	1	71624679	71692359	-1	fibronectin 1 [Source:MGI Symbol;Acc:MGI:95566]	0.00637815
ENSMUSG00000039787	98.5636	1.03641	0.277737	3.73161	0.000190257	0.00484539	Cercam	2	29759176	29772852	1	cerebral endothelial cell adhesion molecule [Source:MGI Symbol;Acc:MGI:2139134]	0.00645616
ENSMUSG00000044037	37.0646	1.67199	0.448322	3.72944	0.000191906	0.0048795	Als2cl	9	110708938	110729598	1	ALS2 C-terminal like [Source:MGI Symbol;Acc:MGI:2447532]	0.00650163
ENSMUSG00000085148	675.361	0.341337	0.0915986	3.72645	0.000194199	0.00492567	Mir22hg	11	75352365	75357502	1	Mir22 host gene (non-protein coding) [Source:MGI Symbol;Acc:MGI:1914348]	0.00656322
ENSMUSG00000068220	3006.23	-0.193751	0.0519962	-3.72625	0.000194348	0.00492567	Lgals1	15	78810925	78814665	1	lectin, galactose binding, soluble 1 [Source:MGI Symbol;Acc:MGI:96777]	0.00656322
ENSMUSG00000038346	668.889	0.367362	0.0987088	3.72168	0.000197902	0.00500768	Zfp384	6	124986108	125014833	1	zinc finger protein 384 [Source:MGI Symbol;Acc:MGI:2443203]	0.00667253
ENSMUSG00000101599	31.9638	1.46732	0.394453	3.71988	0.000199319	0.00503545	Gm20342	1	63156277	63165996	1	predicted gene, 20342 [Source:MGI Symbol;Acc:MGI:5012527]	0.00670956
ENSMUSG00000025270	52.7126	2.08949	0.561831	3.71907	0.000199957	0.00504347	Alas2	X	149330371	149353634	1	aminolevulinic acid synthase 2, erythroid [Source:MGI Symbol;Acc:MGI:87990]	0.00672028
ENSMUSG00000108049	29.564	1.7247	0.464317	3.7145	0.000203608	0.00512132	Gm44168	6	87963173	87966711	1	predicted gene, 44168 [Source:MGI Symbol;Acc:MGI:5690560]	0.00682411
ENSMUSG00000074340	38.703	1.85801	0.500219	3.71439	0.000203695	0.00512132	Ovgp1	3	105881027	105894739	1	oviductal glycoprotein 1 [Source:MGI Symbol;Acc:MGI:106661]	0.00682411
ENSMUSG00000025413	854.053	0.427681	0.115168	3.71353	0.000204388	0.00513057	Ttc4	4	106519453	106536141	-1	tetratricopeptide repeat domain 4 [Source:MGI Symbol;Acc:MGI:1919604]	0.00683644
ENSMUSG00000034675	4901.62	0.244568	0.0659422	3.70882	0.000208224	0.00521852	Dbn1	13	55621242	55635924	-1	drebrin 1 [Source:MGI Symbol;Acc:MGI:1931838]	0.00695369
ENSMUSG00000018372	111.035	0.78864	0.212788	3.70622	0.000210376	0.00526408	Cep95	11	106680078	106710756	1	centrosomal protein 95 [Source:MGI Symbol;Acc:MGI:2443502]	0.00701442
ENSMUSG00000022389	2688.4	0.243335	0.0656887	3.70436	0.000211923	0.00529438	Tef	15	81686622	81711064	1	thyrotroph embryonic factor [Source:MGI Symbol;Acc:MGI:98663]	0.00705482
ENSMUSG00000113100	108.859	0.894528	0.241633	3.70202	0.000213892	0.00533508	Gm48754	13	18106971	18113019	1	predicted gene, 48754 [Source:MGI Symbol;Acc:MGI:6098432]	0.00710912
ENSMUSG00000056167	977.002	0.286573	0.077424	3.70134	0.000214463	0.00533677	Cnot10	9	114414946	114469252	-1	CCR4-NOT transcription complex, subunit 10 [Source:MGI Symbol;Acc:MGI:1926143]	0.00711141
ENSMUSG00000016256	1980.08	-0.219978	0.0594352	-3.70114	0.000214637	0.00533677	Ctsz	2	174269286	174280832	-1	cathepsin Z [Source:MGI Symbol;Acc:MGI:1891190]	0.00711141
ENSMUSG00000025555	742.408	0.37701	0.101887	3.70026	0.000215375	0.00534667	Farp1	14	121272612	121521156	1	FERM, RhoGEF (Arhgef) and pleckstrin domain protein 1 (chondrocyte-derived) [Source:MGI Symbol;Acc:MGI:2446173]	0.00712465
ENSMUSG00000006574	75.258	1.77703	0.48111	3.6936	0.000221104	0.00547272	Slc4a1	11	102239650	102257029	-1	solute carrier family 4 (anion exchanger), member 1 [Source:MGI Symbol;Acc:MGI:109393]	0.00729268
ENSMUSG00000099481	250.301	0.554961	0.150252	3.69355	0.000221148	0.00547272	Xndc1	7	101714718	101732972	1	Xrcc1 N-terminal domain containing 1 [Source:MGI Symbol;Acc:MGI:5546359]	0.00729268
ENSMUSG00000044627	2463.86	-0.244042	0.0661294	-3.69037	0.000223924	0.00553272	Swi5	2	32168828	32178087	-1	SWI5 recombination repair homolog (yeast) [Source:MGI Symbol;Acc:MGI:1920181]	0.00737267
ENSMUSG00000009013	4246.65	-0.206124	0.0558891	-3.68809	0.000225947	0.00557396	Dynll1	5	115435169	115439058	-1	dynein light chain LC8-type 1 [Source:MGI Symbol;Acc:MGI:1861457]	0.00742765
ENSMUSG00000020307	1734.84	-0.210962	0.0572979	-3.68186	0.000231543	0.00570194	Cdc34	10	79518029	79524232	1	cell division cycle 34 [Source:MGI Symbol;Acc:MGI:102657]	0.00759829
ENSMUSG00000063856	3167	-0.326039	0.0885612	-3.68151	0.00023186	0.00570194	Gpx1	9	108216102	108217542	1	glutathione peroxidase 1 [Source:MGI Symbol;Acc:MGI:104887]	0.00759829
ENSMUSG00000112596	13.8657	2.68809	0.730253	3.68104	0.000232285	0.00570349	Gm48804	10	121664923	121667963	-1	predicted gene, 48804 [Source:MGI Symbol;Acc:MGI:6098514]	0.00760038
ENSMUSG00000111068	41.9218	1.15826	0.314752	3.67991	0.000233314	0.00571983	Gm35501	9	122515864	122522707	1	predicted gene, 35501 [Source:MGI Symbol;Acc:MGI:5594660]	0.00762219
ENSMUSG00000030861	1025.58	-0.32795	0.089204	-3.67641	0.000236542	0.00578386	Acadsb	7	131012330	131050673	1	acyl-Coenzyme A dehydrogenase, short/branched chain [Source:MGI Symbol;Acc:MGI:1914135]	0.0077076
ENSMUSG00000036097	494.368	0.590968	0.160752	3.67628	0.000236661	0.00578386	Slf2	19	44919590	44971738	1	SMC5-SMC6 complex localization factor 2 [Source:MGI Symbol;Acc:MGI:1924968]	0.0077076
ENSMUSG00000042750	3862.78	-0.203952	0.055495	-3.67514	0.000237719	0.00580071	Bex2	X	134967313	134968985	-1	brain expressed X-linked 2 [Source:MGI Symbol;Acc:MGI:1338017]	0.00773009
ENSMUSG00000031862	1158.85	0.31297	0.0852441	3.67145	0.000241176	0.00586925	Atp13a1	8	70243813	70260399	1	ATPase type 13A1 [Source:MGI Symbol;Acc:MGI:2180801]	0.00782148
ENSMUSG00000018820	3473.33	0.2712	0.0738693	3.67135	0.000241273	0.00586925	Zfyve27	19	42152390	42183029	1	zinc finger, FYVE domain containing 27 [Source:MGI Symbol;Acc:MGI:1919602]	0.00782148
ENSMUSG00000056296	5165.04	-0.313678	0.0855309	-3.66742	0.000245006	0.00595022	Synpr	14	8853423	9184983	-1	synaptoporin [Source:MGI Symbol;Acc:MGI:1919253]	0.00792947
ENSMUSG00000024976	3155.07	-0.1963	0.0535308	-3.66706	0.000245358	0.00595022	Shoc2	19	53932737	54021564	1	Shoc2, leucine rich repeat scaffold protein [Source:MGI Symbol;Acc:MGI:1927197]	0.00792947
ENSMUSG00000104563	13.6245	2.20321	0.601313	3.66401	0.000248302	0.00601234	Gm43041	5	60110854	60113483	-1	predicted gene 43041 [Source:MGI Symbol;Acc:MGI:5663178]	0.00801231
ENSMUSG00000027589	783.324	0.357774	0.0977215	3.66116	0.000251081	0.00607029	Pcmtd2	2	181479647	181499254	1	protein-L-isoaspartate (D-aspartate) O-methyltransferase domain containing 2 [Source:MGI Symbol;Acc:MGI:1923927]	0.00808958
ENSMUSG00000028078	2956.01	0.240878	0.0658147	3.65994	0.000252273	0.00608963	Dclk2	3	86693458	86828159	-1	doublecortin-like kinase 2 [Source:MGI Symbol;Acc:MGI:1918012]	0.0081154
ENSMUSG00000007603	1133.48	0.336475	0.0919443	3.65955	0.000252654	0.00608963	Dus3l	17	57071757	57077093	1	dihydrouridine synthase 3-like (S. cerevisiae) [Source:MGI Symbol;Acc:MGI:2147092]	0.0081154
ENSMUSG00000041481	2735.13	-0.306551	0.083834	-3.65665	0.000255535	0.00614964	Serpina3g	12	104202504	104208198	1	serine (or cysteine) peptidase inhibitor, clade A, member 3G [Source:MGI Symbol;Acc:MGI:105046]	0.00819543
ENSMUSG00000018537	335.584	0.600803	0.164456	3.65327	0.000258925	0.0062217	Pcgf2	11	97579649	97591323	-1	polycomb group ring finger 2 [Source:MGI Symbol;Acc:MGI:99161]	0.00829151
ENSMUSG00000043441	750.496	-0.357584	0.0979278	-3.65151	0.000260703	0.00624926	Gpr149	3	62436498	62512561	-1	G protein-coupled receptor 149 [Source:MGI Symbol;Acc:MGI:2443628]	0.00832832
ENSMUSG00000084950	37.4477	1.44434	0.395563	3.65135	0.000260866	0.00624926	Gm5577	6	87957865	87982453	1	predicted gene 5577 [Source:MGI Symbol;Acc:MGI:3648213]	0.00832832
ENSMUSG00000038368	1012.72	0.301205	0.0825456	3.64895	0.000263318	0.00629842	Focad	4	88012866	88329248	1	focadhesin [Source:MGI Symbol;Acc:MGI:2676921]	0.00839386
ENSMUSG00000032301	2113.78	-0.240104	0.0658151	-3.64816	0.000264126	0.00630816	Psma4	9	54858074	54865314	1	proteasome subunit alpha 4 [Source:MGI Symbol;Acc:MGI:1347060]	0.00840688
ENSMUSG00000007891	28500	-0.132923	0.036444	-3.64733	0.000264979	0.00631894	Ctsd	7	141929648	141941775	-1	cathepsin D [Source:MGI Symbol;Acc:MGI:88562]	0.00842129
ENSMUSG00000019254	3036.54	0.258164	0.0707946	3.64667	0.000265663	0.00632566	Ppp1r12c	7	4484519	4504679	-1	protein phosphatase 1, regulatory subunit 12C [Source:MGI Symbol;Acc:MGI:1924258]	0.00843029
ENSMUSG00000033862	1072.49	0.285504	0.0783137	3.64564	0.000266726	0.0063414	Cdk10	8	123951581	123958989	1	cyclin-dependent kinase 10 [Source:MGI Symbol;Acc:MGI:2448549]	0.00845128
ENSMUSG00000032855	2408.97	0.495323	0.136018	3.64159	0.000270962	0.00643238	Pkd1	17	24768808	24815482	1	polycystin 1, transient receptor poteintial channel interacting [Source:MGI Symbol;Acc:MGI:97603]	0.00857259
ENSMUSG00000027375	1154.29	-0.364649	0.10017	-3.64031	0.000272308	0.0064546	Mal	2	127475146	127498615	-1	myelin and lymphocyte protein, T cell differentiation protein [Source:MGI Symbol;Acc:MGI:892970]	0.00860223
ENSMUSG00000108738	18.7588	2.36894	0.650922	3.63936	0.000273318	0.0064688	Gm44777	7	115933490	115937868	1	predicted gene 44777 [Source:MGI Symbol;Acc:MGI:5753353]	0.0086212
ENSMUSG00000036606	1147.51	0.376903	0.103584	3.63861	0.000274114	0.00647791	Plxnb2	15	89039752	89064991	-1	plexin B2 [Source:MGI Symbol;Acc:MGI:2154239]	0.00863336
ENSMUSG00000033257	236.492	0.837609	0.230239	3.63799	0.000274774	0.00648247	Ttll4	1	74700904	74742889	1	tubulin tyrosine ligase-like family, member 4 [Source:MGI Symbol;Acc:MGI:1914784]	0.00863952
ENSMUSG00000072244	54.2768	0.99917	0.274674	3.63766	0.000275131	0.00648247	Trim6	7	103868000	103884359	1	tripartite motif-containing 6 [Source:MGI Symbol;Acc:MGI:2137352]	0.00863952
ENSMUSG00000058254	7095.81	-0.161788	0.04452	-3.63404	0.000279013	0.0065586	Tspan7	X	10351397	10462844	1	tetraspanin 7 [Source:MGI Symbol;Acc:MGI:1298407]	0.00874108
ENSMUSG00000074415	393.893	0.634525	0.174614	3.63388	0.000279196	0.0065586	Mir100hg	9	41238373	41628290	1	Mir100 Mirlet7a-2 Mir125b-1 cluster host gene [Source:MGI Symbol;Acc:MGI:1920394]	0.00874108
ENSMUSG00000021738	430.198	0.510409	0.140629	3.62946	0.000284011	0.00665582	Atxn7	14	8362461	8508323	-1	ataxin 7 [Source:MGI Symbol;Acc:MGI:2179277]	0.00887072
ENSMUSG00000027952	1776.75	-0.227141	0.062585	-3.62931	0.00028418	0.00665582	Pmvk	3	89361848	89376320	1	phosphomevalonate kinase [Source:MGI Symbol;Acc:MGI:1915853]	0.00887072
ENSMUSG00000006373	4134.09	-0.224829	0.0619767	-3.62764	0.000286025	0.00668908	Pgrmc1	X	35861859	35869732	1	progesterone receptor membrane component 1 [Source:MGI Symbol;Acc:MGI:1858305]	0.00891508
ENSMUSG00000052684	9759.64	0.223561	0.0616734	3.62492	0.000289055	0.00674991	Jun	4	94937271	94940459	-1	jun proto-oncogene [Source:MGI Symbol;Acc:MGI:96646]	0.0089962
ENSMUSG00000027263	2140.96	0.248178	0.0684808	3.62405	0.000290025	0.00676253	Tubgcp4	2	121001135	121029251	1	tubulin, gamma complex associated protein 4 [Source:MGI Symbol;Acc:MGI:1196293]	0.00901305
ENSMUSG00000025138	682.696	0.482427	0.133141	3.62342	0.00029073	0.00676411	Sirt7	11	120509198	120516066	-1	sirtuin 7 [Source:MGI Symbol;Acc:MGI:2385849]	0.00901526
ENSMUSG00000017188	1333.11	-0.245549	0.067771	-3.62323	0.000290953	0.00676411	Coa3	11	101168794	101169940	-1	cytochrome C oxidase assembly factor 3 [Source:MGI Symbol;Acc:MGI:1098757]	0.00901526
ENSMUSG00000100254	23.5989	2.33709	0.645474	3.62074	0.000293766	0.00681944	Trpc2	7	101732323	101745603	1	transient receptor potential cation channel, subfamily C, member 2 [Source:MGI Symbol;Acc:MGI:109527]	0.00908903
ENSMUSG00000072772	1544.6	-0.263744	0.0728691	-3.61942	0.000295262	0.00684409	Grcc10	6	124716146	124718337	-1	gene rich cluster, C10 gene [Source:MGI Symbol;Acc:MGI:1315201]	0.0091219
ENSMUSG00000031858	2121.06	0.223986	0.0619563	3.61523	0.000300086	0.00694568	Mau2	8	70468773	70495384	-1	MAU2 sister chromatid cohesion factor [Source:MGI Symbol;Acc:MGI:1921799]	0.00925735
ENSMUSG00000001062	907.823	0.302078	0.0835712	3.61462	0.000300783	0.00695157	Vps9d1	8	123969095	123981087	-1	VPS9 domain containing 1 [Source:MGI Symbol;Acc:MGI:1914143]	0.00926526
ENSMUSG00000072676	1781.05	-0.277927	0.0769013	-3.61407	0.000301425	0.00695619	Tmem254a	14	25923724	25928096	-1	transmembrane protein 254a [Source:MGI Symbol;Acc:MGI:1196450]	0.00927146
ENSMUSG00000020708	5075.74	-0.171256	0.0473941	-3.61345	0.000302154	0.00696282	Psmc5	11	106146980	106153946	1	protease (prosome, macropain) 26S subunit, ATPase 5 [Source:MGI Symbol;Acc:MGI:105047]	0.00928032
ENSMUSG00000036270	1179.81	0.395427	0.109615	3.60743	0.000309239	0.00711566	Edc4	8	106607513	106621540	1	enhancer of mRNA decapping 4 [Source:MGI Symbol;Acc:MGI:2446249]	0.00948408
ENSMUSG00000032531	380.772	0.392934	0.108937	3.60696	0.0003098	0.00711818	Amotl2	9	102593871	102610617	1	angiomotin-like 2 [Source:MGI Symbol;Acc:MGI:1929286]	0.00948746
ENSMUSG00000001138	533.115	0.394164	0.109326	3.60541	0.000311666	0.00714268	Cnnm3	1	36550948	36567318	1	cyclin M3 [Source:MGI Symbol;Acc:MGI:2151055]	0.00952022
ENSMUSG00000022483	22.8113	1.68081	0.466204	3.60531	0.000311775	0.00714268	Col2a1	15	97873483	97902576	-1	collagen, type II, alpha 1 [Source:MGI Symbol;Acc:MGI:88452]	0.00952022
ENSMUSG00000043279	551.79	-0.51772	0.143679	-3.60332	0.000314181	0.00718325	Trim56	5	137134498	137145063	-1	tripartite motif-containing 56 [Source:MGI Symbol;Acc:MGI:2685298]	0.00957436
ENSMUSG00000031755	611.169	0.454752	0.126212	3.60309	0.000314458	0.00718325	Bbs2	8	94794582	94825556	-1	Bardet-Biedl syndrome 2 (human) [Source:MGI Symbol;Acc:MGI:2135267]	0.00957436
ENSMUSG00000031986	342.977	0.406631	0.112879	3.60236	0.000315341	0.00719296	Sprtn	8	125624625	125632900	1	SprT-like N-terminal domain [Source:MGI Symbol;Acc:MGI:2685351]	0.00958737
ENSMUSG00000032175	463.364	0.44122	0.122513	3.60141	0.000316491	0.00720876	Tyk2	9	21015364	21042539	-1	tyrosine kinase 2 [Source:MGI Symbol;Acc:MGI:1929470]	0.00960845
ENSMUSG00000029675	129.655	0.872864	0.24243	3.60048	0.000317633	0.00722432	Eln	5	134731447	134776177	-1	elastin [Source:MGI Symbol;Acc:MGI:95317]	0.00962922
ENSMUSG00000025050	196.662	0.666037	0.185066	3.59892	0.000319538	0.00725714	Pcgf6	19	47022056	47039345	-1	polycomb group ring finger 6 [Source:MGI Symbol;Acc:MGI:1918291]	0.00967304
ENSMUSG00000026344	340.559	-0.410233	0.114021	-3.59787	0.000320832	0.00727604	Lypd1	1	125795359	125840838	-1	Ly6/Plaur domain containing 1 [Source:MGI Symbol;Acc:MGI:1919835]	0.00969825
ENSMUSG00000030536	1112.79	0.334758	0.0931116	3.59524	0.000324098	0.00732228	Iqgap1	7	80361331	80475722	-1	IQ motif containing GTPase activating protein 1 [Source:MGI Symbol;Acc:MGI:1352757]	0.00975999
ENSMUSG00000035621	1765.31	0.34087	0.0948142	3.59514	0.000324221	0.00732228	Midn	10	79984106	79994202	1	midnolin [Source:MGI Symbol;Acc:MGI:1890222]	0.00975999
ENSMUSG00000010914	904.718	-0.297342	0.0827077	-3.5951	0.000324266	0.00732228	Pdhx	2	102851420	102903858	-1	pyruvate dehydrogenase complex, component X [Source:MGI Symbol;Acc:MGI:1351627]	0.00975999
ENSMUSG00000052584	703.528	-0.338657	0.0942308	-3.59392	0.000325746	0.00734515	Serp2	14	76770254	76794329	-1	stress-associated endoplasmic reticulum protein family member 2 [Source:MGI Symbol;Acc:MGI:1919911]	0.00979053
ENSMUSG00000028419	2014.69	-0.210694	0.0586885	-3.59004	0.000330626	0.0074399	Chmp5	4	40948407	40965303	1	charged multivesicular body protein 5 [Source:MGI Symbol;Acc:MGI:1924209]	0.00991689
ENSMUSG00000010660	418.233	0.466812	0.130037	3.58983	0.000330893	0.0074399	Plcd1	9	118900595	118922570	-1	phospholipase C, delta 1 [Source:MGI Symbol;Acc:MGI:97614]	0.00991689
ENSMUSG00000052566	164.402	0.711223	0.198264	3.58725	0.000334186	0.00750321	Hook2	8	85717232	85729978	1	hook microtubule tethering protein 2 [Source:MGI Symbol;Acc:MGI:2181664]	0.0100013
ENSMUSG00000040054	1958.13	0.223016	0.0622159	3.58455	0.000337659	0.0075704	Baz2a	10	127927446	127965172	1	bromodomain adjacent to zinc finger domain, 2A [Source:MGI Symbol;Acc:MGI:2151152]	0.0100909
ENSMUSG00000103983	32.7455	1.84413	0.514547	3.58399	0.000338384	0.00757584	Gm20045	1	171148169	171153745	-1	predicted gene, 20045 [Source:MGI Symbol;Acc:MGI:5012230]	0.0100982
ENSMUSG00000022899	96.6865	0.770805	0.215116	3.58321	0.000339391	0.00757967	Slc15a2	16	36570539	36605324	-1	solute carrier family 15 (H+/peptide transporter), member 2 [Source:MGI Symbol;Acc:MGI:1890457]	0.0101034
ENSMUSG00000031826	1538.12	0.279195	0.0779196	3.58312	0.000339518	0.00757967	Usp10	8	120637099	120684299	1	ubiquitin specific peptidase 10 [Source:MGI Symbol;Acc:MGI:894652]	0.0101034
ENSMUSG00000079037	14163	-0.168809	0.0471357	-3.58134	0.000341835	0.00760882	Prnp	2	131751848	131780349	1	prion protein [Source:MGI Symbol;Acc:MGI:97769]	0.0101424
ENSMUSG00000026923	1509.41	0.431057	0.120369	3.58114	0.000342097	0.00760882	Notch1	2	26347915	26406675	-1	notch 1 [Source:MGI Symbol;Acc:MGI:97363]	0.0101424
ENSMUSG00000024219	1675.44	0.283521	0.0791736	3.58101	0.000342274	0.00760882	Anks1	17	28128280	28281749	1	ankyrin repeat and SAM domain containing 1 [Source:MGI Symbol;Acc:MGI:2446180]	0.0101424
ENSMUSG00000032420	1098.21	-0.299832	0.0837503	-3.58008	0.000343493	0.00761446	Nt5e	9	88209250	88254145	1	5' nucleotidase, ecto [Source:MGI Symbol;Acc:MGI:99782]	0.01015
ENSMUSG00000031503	1291.66	0.438455	0.122471	3.58008	0.000343495	0.00761446	Col4a2	8	11362805	11499287	1	collagen, type IV, alpha 2 [Source:MGI Symbol;Acc:MGI:88455]	0.01015
ENSMUSG00000028689	84.2934	0.908772	0.254034	3.57736	0.000347084	0.00768236	Ccdc163	4	116565706	116608403	1	coiled-coil domain containing 163 [Source:MGI Symbol;Acc:MGI:1915644]	0.0102406
ENSMUSG00000001289	1447.62	-0.377721	0.105604	-3.57677	0.000347869	0.00768236	Pfdn5	15	102234551	102240308	1	prefoldin 5 [Source:MGI Symbol;Acc:MGI:1928753]	0.0102406
ENSMUSG00000038902	812.868	0.378359	0.105786	3.57665	0.000348022	0.00768236	Pogz	3	94744878	94789637	1	pogo transposable element with ZNF domain [Source:MGI Symbol;Acc:MGI:2442117]	0.0102406
ENSMUSG00000052374	44.6793	1.42579	0.39876	3.57556	0.000349484	0.00770381	Actn2	13	12284312	12355641	-1	actinin alpha 2 [Source:MGI Symbol;Acc:MGI:109192]	0.0102693
ENSMUSG00000037499	659.509	-0.292788	0.0819105	-3.57448	0.00035092	0.00772452	Nenf	1	191038986	191050391	-1	neuron derived neurotrophic factor [Source:MGI Symbol;Acc:MGI:1913458]	0.010297
ENSMUSG00000031104	337.93	-0.439509	0.122982	-3.57378	0.000351868	0.00772452	Rab33a	X	47608162	47619109	1	RAB33A, member RAS oncogene family [Source:MGI Symbol;Acc:MGI:109493]	0.010297
ENSMUSG00000022779	675.59	0.477715	0.133673	3.57376	0.000351895	0.00772452	Top3b	16	16688600	16710854	1	topoisomerase (DNA) III beta [Source:MGI Symbol;Acc:MGI:1333803]	0.010297
ENSMUSG00000074656	2339.95	-0.209676	0.0586808	-3.57317	0.000352686	0.0077311	Eif2s2	2	154713330	154734855	-1	eukaryotic translation initiation factor 2, subunit 2 (beta) [Source:MGI Symbol;Acc:MGI:1914454]	0.0103058
ENSMUSG00000110710	1836.49	2.22872	0.624543	3.56855	0.000358961	0.0078577	C78859	8	95048786	95054728	1	expressed sequence C78859 [Source:MGI Symbol;Acc:MGI:2142856]	0.0104746
ENSMUSG00000015605	582.669	0.451834	0.126809	3.56311	0.000366487	0.00801061	Srf	17	46859255	46867101	-1	serum response factor [Source:MGI Symbol;Acc:MGI:106658]	0.0106785
ENSMUSG00000028869	1493.42	0.221474	0.0621635	3.56277	0.000366964	0.00801061	Gnl2	4	124910378	124949173	1	guanine nucleotide binding protein-like 2 (nucleolar) [Source:MGI Symbol;Acc:MGI:2385207]	0.0106785
ENSMUSG00000092412	3.54812	-5.45343	1.53174	-3.56029	0.000370452	NA	Gm20507	17	33849733	33864679	1	predicted gene 20507 [Source:MGI Symbol;Acc:MGI:5141972]	0.0107651
ENSMUSG00000028795	314.638	0.475474	0.133628	3.5582	0.000373412	0.00812584	Ccdc28b	4	129513067	129517740	-1	coiled coil domain containing 28B [Source:MGI Symbol;Acc:MGI:1913514]	0.0108174
ENSMUSG00000032217	1041.73	0.284423	0.0799468	3.55765	0.000374187	0.00812584	Rnf111	9	70332706	70411007	-1	ring finger 111 [Source:MGI Symbol;Acc:MGI:1934919]	0.0108174
ENSMUSG00000031347	762.81	-0.290175	0.0815647	-3.55761	0.000374247	0.00812584	Cetn2	X	71957138	71962017	-1	centrin 2 [Source:MGI Symbol;Acc:MGI:1347085]	0.0108174
ENSMUSG00000076432	10055	-0.182026	0.0511658	-3.55757	0.000374308	0.00812584	Ywhaq	12	21440072	21467638	-1	tyrosine 3-monooxygenase/tryptophan 5-monooxygenase activation protein theta [Source:MGI Symbol;Acc:MGI:891963]	0.0108174
ENSMUSG00000096768	899.898	1.36597	0.384032	3.55692	0.000375224	0.00813451	Gm47283	Y	90796007	90827734	1	predicted gene, 47283 [Source:MGI Symbol;Acc:MGI:6096131]	0.010829
ENSMUSG00000017724	143.99	0.769116	0.216278	3.55615	0.000376325	0.00814716	Etv4	11	101660568	101676197	-1	ets variant 4 [Source:MGI Symbol;Acc:MGI:99423]	0.0108459
ENSMUSG00000091537	1614.93	-0.272651	0.0767679	-3.55163	0.000382856	0.00827716	Tma7	9	108903636	108911655	-1	translational machinery associated 7 [Source:MGI Symbol;Acc:MGI:1913417]	0.011019
ENSMUSG00000030729	11988.4	-0.170308	0.0479643	-3.55072	0.000384177	0.00829433	Pgm2l1	7	99876601	99928075	1	phosphoglucomutase 2-like 1 [Source:MGI Symbol;Acc:MGI:1918224]	0.0110419
ENSMUSG00000000184	77.1903	0.969498	0.273102	3.54995	0.00038531	0.00830739	Ccnd2	6	127102125	127129156	-1	cyclin D2 [Source:MGI Symbol;Acc:MGI:88314]	0.0110594
ENSMUSG00000029071	2169.29	0.329758	0.0929623	3.54722	0.000389317	0.0083823	Dvl1	4	155931859	155943760	1	dishevelled segment polarity protein 1 [Source:MGI Symbol;Acc:MGI:94941]	0.0111592
ENSMUSG00000020474	140.304	0.628875	0.177346	3.54604	0.000391068	0.00840851	Polm	11	5777860	5788016	-1	polymerase (DNA directed), mu [Source:MGI Symbol;Acc:MGI:1860191]	0.0111941
ENSMUSG00000039461	1832.49	-0.237518	0.0670029	-3.54489	0.000392774	0.00843365	Tcta	9	108180157	108183359	-1	T cell leukemia translocation altered gene [Source:MGI Symbol;Acc:MGI:1918829]	0.0112277
ENSMUSG00000111481	44.2298	1.24414	0.351024	3.54431	0.000393648	0.00843728	Gm47652	9	37241063	37245725	-1	predicted gene, 47652 [Source:MGI Symbol;Acc:MGI:6096735]	0.0112327
ENSMUSG00000028557	5300.74	-0.213911	0.0603628	-3.54376	0.000394463	0.00843728	Rnf11	4	109308295	109341925	-1	ring finger protein 11 [Source:MGI Symbol;Acc:MGI:1352759]	0.0112327
ENSMUSG00000033852	49.2691	1.34775	0.380323	3.5437	0.000394551	0.00843728	Gm28042	2	119857974	119873514	1	predicted gene, 28042 [Source:MGI Symbol;Acc:MGI:5547778]	0.0112327
ENSMUSG00000023367	1598.16	-0.382539	0.10799	-3.54234	0.000396589	0.00846853	Tmem176a	6	48817853	48824005	1	transmembrane protein 176A [Source:MGI Symbol;Acc:MGI:1913308]	0.0112744
ENSMUSG00000055024	1005.43	0.271215	0.0765709	3.54201	0.000397089	0.00846853	Ep300	15	81469552	81536278	1	E1A binding protein p300 [Source:MGI Symbol;Acc:MGI:1276116]	0.0112744
ENSMUSG00000032320	1048.56	-0.249865	0.0705567	-3.54134	0.000398098	0.00846932	Rcn2	9	55949129	55969166	1	reticulocalbin 2 [Source:MGI Symbol;Acc:MGI:1349765]	0.0112757
ENSMUSG00000050666	254.796	-0.496537	0.140235	-3.54075	0.000398996	0.00846932	Vstm4	14	32578713	32661448	1	V-set and transmembrane domain containing 4 [Source:MGI Symbol;Acc:MGI:2444633]	0.0112757
ENSMUSG00000058498	236.124	1.51431	0.427693	3.54066	0.000399132	0.00846932	Rnf207	4	152391476	152403450	-1	ring finger protein 207 [Source:MGI Symbol;Acc:MGI:2684989]	0.0112757
ENSMUSG00000019998	4562.96	-0.201787	0.0569928	-3.54056	0.000399278	0.00846932	Stx7	10	24025200	24066120	1	syntaxin 7 [Source:MGI Symbol;Acc:MGI:1858210]	0.0112757
ENSMUSG00000039307	557.104	0.384634	0.108662	3.53974	0.000400521	0.00848425	Hexdc	11	121095259	121113481	1	hexosaminidase (glycosyl hydrolase family 20, catalytic domain) containing [Source:MGI Symbol;Acc:MGI:3605542]	0.0112957
ENSMUSG00000031295	558.193	0.375949	0.106262	3.53796	0.000403233	0.00853023	Phka2	X	159285162	159381874	1	phosphorylase kinase alpha 2 [Source:MGI Symbol;Acc:MGI:97577]	0.0113569
ENSMUSG00000057738	50988.2	0.205794	0.0582003	3.53596	0.000406291	0.00858337	Sptan1	2	29855572	29921463	1	spectrin alpha, non-erythrocytic 1 [Source:MGI Symbol;Acc:MGI:98386]	0.0114277
ENSMUSG00000038685	476.665	0.688095	0.195229	3.52456	0.000424188	0.00894946	Rtel1	2	180961532	180998409	1	regulator of telomere elongation helicase 1 [Source:MGI Symbol;Acc:MGI:2139369]	0.0119152
ENSMUSG00000022843	485.194	0.633026	0.179812	3.52049	0.000430755	0.00907585	Clcn2	16	20521714	20536496	-1	chloride channel, voltage-sensitive 2 [Source:MGI Symbol;Acc:MGI:105061]	0.0120835
ENSMUSG00000020289	1019.87	0.275946	0.0784211	3.51877	0.000433551	0.00912254	Nprl3	11	32175628	32217707	-1	nitrogen permease regulator-like 3 [Source:MGI Symbol;Acc:MGI:109258]	0.0121458
ENSMUSG00000048482	1005.19	-0.29495	0.0838679	-3.51684	0.000436713	0.0091768	Bdnf	2	109505045	109557352	1	brain derived neurotrophic factor [Source:MGI Symbol;Acc:MGI:88145]	0.0122181
ENSMUSG00000036246	266.838	0.683954	0.194685	3.51314	0.000442845	0.00928586	Gmip	8	70261329	70274520	1	Gem-interacting protein [Source:MGI Symbol;Acc:MGI:1926066]	0.0123634
ENSMUSG00000027581	19738.6	-0.198824	0.0565967	-3.513	0.000443083	0.00928586	Stmn3	2	180948252	180956293	-1	stathmin-like 3 [Source:MGI Symbol;Acc:MGI:1277137]	0.0123634
ENSMUSG00000029456	220.683	0.692537	0.19716	3.51256	0.000443816	0.00928886	Acad10	5	121759089	121798577	-1	acyl-Coenzyme A dehydrogenase family, member 10 [Source:MGI Symbol;Acc:MGI:1919235]	0.0123675
ENSMUSG00000102854	17.9893	1.8897	0.538397	3.50986	0.000448344	0.00937089	C130023A14Rik	16	77443228	77446314	1	RIKEN cDNA C130023A14 gene [Source:MGI Symbol;Acc:MGI:2442654]	0.0124768
ENSMUSG00000024163	21091.9	0.233145	0.0664323	3.50951	0.000448926	0.00937089	Mapk8ip3	17	25111127	25155951	-1	mitogen-activated protein kinase 8 interacting protein 3 [Source:MGI Symbol;Acc:MGI:1353598]	0.0124768
ENSMUSG00000038252	338.932	0.538252	0.153397	3.50889	0.000449989	0.00937295	Ncapd2	6	125144970	125168664	-1	non-SMC condensin I complex, subunit D2 [Source:MGI Symbol;Acc:MGI:1915548]	0.0124797
ENSMUSG00000034163	1507.9	0.361455	0.103015	3.50875	0.000450216	0.00937295	Zfc3h1	10	115220864	115268677	1	zinc finger, C3H1-type containing [Source:MGI Symbol;Acc:MGI:2446143]	0.0124797
ENSMUSG00000059866	102.922	0.789345	0.225034	3.50768	0.000452037	0.00939843	Tnip2	5	34653431	34671335	-1	TNFAIP3 interacting protein 2 [Source:MGI Symbol;Acc:MGI:2386643]	0.0125137
ENSMUSG00000103364	19.1535	1.97609	0.56358	3.50633	0.00045434	0.00943384	Gm38157	1	34071181	34072878	1	predicted gene, 38157 [Source:MGI Symbol;Acc:MGI:5611385]	0.0125609
ENSMUSG00000041879	2513.38	0.240043	0.0685292	3.50278	0.000460431	0.0095363	Ipo9	1	135310050	135358237	-1	importin 9 [Source:MGI Symbol;Acc:MGI:1918944]	0.0126975
ENSMUSG00000024498	1842.43	0.224124	0.0639852	3.50275	0.000460486	0.0095363	Tcerg1	18	42644552	42708858	1	transcription elongation regulator 1 (CA150) [Source:MGI Symbol;Acc:MGI:1926421]	0.0126975
ENSMUSG00000101122	10.4554	2.46423	0.70478	3.49646	0.000471477	NA	Gm17971	1	55105423	55106228	1	predicted gene, 17971 [Source:MGI Symbol;Acc:MGI:5010156]	0.0129835
ENSMUSG00000072647	158.639	0.905256	0.258941	3.49599	0.000472311	0.00976833	Adam1a	5	121656639	121660134	-1	a disintegrin and metallopeptidase domain 1a [Source:MGI Symbol;Acc:MGI:2429504]	0.0129895
ENSMUSG00000022122	3828.11	-0.238436	0.0682112	-3.49556	0.000473074	0.00977127	Ednrb	14	104052061	104081838	-1	endothelin receptor type B [Source:MGI Symbol;Acc:MGI:102720]	0.0129935
ENSMUSG00000056569	4587.66	-0.301838	0.086361	-3.49507	0.000473934	0.00977622	Mpz	1	170978280	170988699	1	myelin protein zero [Source:MGI Symbol;Acc:MGI:103177]	0.0130001
ENSMUSG00000019854	1040.97	0.299741	0.0857805	3.49428	0.000475341	0.00978113	Reps1	10	17931609	18000903	1	RalBP1 associated Eps domain containing protein [Source:MGI Symbol;Acc:MGI:1196373]	0.0130069
ENSMUSG00000008307	17.993	2.31594	0.662788	3.49424	0.000475416	0.00978113	1700109H08Rik	5	3621566	3634356	1	RIKEN cDNA 1700109H08 gene [Source:MGI Symbol;Acc:MGI:1924286]	0.0130069
ENSMUSG00000009549	2278.56	-0.20652	0.0591119	-3.49371	0.000476364	0.00978785	Srp14	2	118306331	118310192	-1	signal recognition particle 14 [Source:MGI Symbol;Acc:MGI:107169]	0.0130159
ENSMUSG00000019775	1439.15	-0.264626	0.0757572	-3.49308	0.000477484	0.00979807	Rgs17	10	5775663	5872400	-1	regulator of G-protein signaling 17 [Source:MGI Symbol;Acc:MGI:1927469]	0.0130296
ENSMUSG00000031161	1060.91	0.311371	0.0892204	3.48991	0.000483187	0.00990218	Hdac6	X	7796359	7814128	-1	histone deacetylase 6 [Source:MGI Symbol;Acc:MGI:1333752]	0.0131681
ENSMUSG00000024427	601.161	0.315548	0.090464	3.48811	0.000486453	0.00995615	Spry4	18	38719300	38734468	-1	sprouty RTK signaling antagonist 4 [Source:MGI Symbol;Acc:MGI:1345144]	0.01324
ENSMUSG00000025037	1543.14	-0.214382	0.0614843	-3.48677	0.000488896	0.00999316	Maoa	X	16485937	16554057	1	monoamine oxidase A [Source:MGI Symbol;Acc:MGI:96915]	0.0132893
ENSMUSG00000071415	3635.44	-0.246378	0.0706893	-3.48537	0.000491461	0.0100326	Rpl23	11	97668353	97673263	-1	ribosomal protein L23 [Source:MGI Symbol;Acc:MGI:1929455]	0.0133417
ENSMUSG00000073643	498.347	0.454336	0.130383	3.48462	0.000492839	0.0100351	Wdfy1	1	79679979	79753860	-1	WD repeat and FYVE domain containing 1 [Source:MGI Symbol;Acc:MGI:1916618]	0.0133453
ENSMUSG00000020923	2037.01	0.253126	0.0726411	3.48461	0.000492862	0.0100351	Ubtf	11	102195386	102210568	-1	upstream binding transcription factor, RNA polymerase I [Source:MGI Symbol;Acc:MGI:98512]	0.0133453
ENSMUSG00000036916	278.698	0.606245	0.173999	3.48418	0.000493639	0.010038	Zfp280c	X	47630502	47683381	-1	zinc finger protein 280C [Source:MGI Symbol;Acc:MGI:2387585]	0.0133492
ENSMUSG00000019986	1109.41	0.301765	0.0866721	3.48168	0.000498278	0.0101192	Ahi1	10	20828446	20956328	1	Abelson helper integration site 1 [Source:MGI Symbol;Acc:MGI:87971]	0.0134573
ENSMUSG00000029060	1403.19	0.269953	0.0775497	3.48104	0.000499476	0.0101305	Mib2	4	155739134	155753655	-1	mindbomb E3 ubiquitin protein ligase 2 [Source:MGI Symbol;Acc:MGI:2679684]	0.0134724
ENSMUSG00000039114	10649.7	-0.176667	0.0507629	-3.48023	0.000500985	0.010148	Nrn1	13	36909335	36919105	-1	neuritin 1 [Source:MGI Symbol;Acc:MGI:1915654]	0.0134958
ENSMUSG00000024325	669.271	0.422679	0.121524	3.47815	0.000504887	0.0102139	Ring1	17	34239766	34243654	-1	ring finger protein 1 [Source:MGI Symbol;Acc:MGI:1101770]	0.0135835
ENSMUSG00000071252	193.984	-0.581336	0.167168	-3.47755	0.000506017	0.0102236	2210408I21Rik	13	77283659	77761903	1	RIKEN cDNA 2210408I21 gene [Source:MGI Symbol;Acc:MGI:1919621]	0.0135965
ENSMUSG00000036931	39.0091	1.23363	0.354832	3.47666	0.000507692	0.0102443	Nfkbid	7	30121157	30128171	1	nuclear factor of kappa light polypeptide gene enhancer in B cells inhibitor, delta [Source:MGI Symbol;Acc:MGI:3041243]	0.0136241
ENSMUSG00000000916	284.887	0.431922	0.12425	3.47624	0.000508502	0.0102475	Nsun5	5	135398807	135405659	1	NOL1/NOP2/Sun domain family, member 5 [Source:MGI Symbol;Acc:MGI:2140844]	0.0136285
ENSMUSG00000070551	78.496	1.01544	0.292469	3.47195	0.00051669	0.0103881	Mrgprb5	7	47817731	47818767	-1	MAS-related GPR, member B5 [Source:MGI Symbol;Acc:MGI:3033121]	0.0138156
ENSMUSG00000004994	223.571	0.498636	0.143621	3.4719	0.000516796	0.0103881	Ccdc130	8	84984424	84997009	-1	coiled-coil domain containing 130 [Source:MGI Symbol;Acc:MGI:1914986]	0.0138156
ENSMUSG00000024346	1328.85	-0.295735	0.0852017	-3.471	0.000518521	0.0104094	Pfdn1	18	36536729	36587577	-1	prefoldin 1 [Source:MGI Symbol;Acc:MGI:1914449]	0.0138441
ENSMUSG00000025008	238.728	0.585678	0.168795	3.46976	0.000520926	0.0104444	Tctn3	19	40584890	40600677	-1	tectonic family member 3 [Source:MGI Symbol;Acc:MGI:1914840]	0.0138907
ENSMUSG00000026207	1302.23	0.441829	0.127421	3.46747	0.000525384	0.0105204	Speg	1	75351941	75408964	1	SPEG complex locus [Source:MGI Symbol;Acc:MGI:109282]	0.0139918
ENSMUSG00000022216	434.123	-0.48729	0.140556	-3.46687	0.000526564	0.0105306	Psme1	14	55815580	55818986	1	proteasome (prosome, macropain) activator subunit 1 (PA28 alpha) [Source:MGI Symbol;Acc:MGI:1096367]	0.0140055
ENSMUSG00000031812	15495	-0.170177	0.0491146	-3.46491	0.000530414	0.0105941	Map1lc3b	8	122317100	122325499	1	microtubule-associated protein 1 light chain 3 beta [Source:MGI Symbol;Acc:MGI:1914693]	0.0140901
ENSMUSG00000039834	699.815	0.293923	0.0849601	3.45955	0.000541083	0.0107771	Zfp335	2	164733802	164753677	-1	zinc finger protein 335 [Source:MGI Symbol;Acc:MGI:2682313]	0.0143337
ENSMUSG00000022437	2817.24	0.231734	0.0669865	3.45941	0.00054136	0.0107771	Samm50	15	84076442	84101468	1	SAMM50 sorting and assembly machinery component [Source:MGI Symbol;Acc:MGI:1915903]	0.0143337
ENSMUSG00000026274	89.7404	1.3519	0.390803	3.45928	0.000541627	0.0107771	Pask	1	93236492	93271204	-1	PAS domain containing serine/threonine kinase [Source:MGI Symbol;Acc:MGI:2155936]	0.0143337
ENSMUSG00000032231	28984.2	-0.160764	0.0464788	-3.45887	0.00054244	0.0107796	Anxa2	9	69360902	69399077	1	annexin A2 [Source:MGI Symbol;Acc:MGI:88246]	0.0143372
ENSMUSG00000034158	2437.54	-0.177665	0.0513934	-3.45697	0.00054629	0.0108395	Lrrc58	16	37688751	37709220	1	leucine rich repeat containing 58 [Source:MGI Symbol;Acc:MGI:2443542]	0.0144171
ENSMUSG00000030630	739.032	0.310533	0.0898403	3.4565	0.000547239	0.0108395	Fah	7	84234367	84255930	-1	fumarylacetoacetate hydrolase [Source:MGI Symbol;Acc:MGI:95482]	0.0144171
ENSMUSG00000047417	1083.65	0.411866	0.119162	3.45636	0.000547521	0.0108395	Rexo1	10	80376756	80397394	-1	REX1, RNA exonuclease 1 [Source:MGI Symbol;Acc:MGI:1914182]	0.0144171
ENSMUSG00000075227	675.677	-0.298211	0.0863298	-3.45432	0.000551689	0.0109083	Znhit2	19	6111222	6112502	1	zinc finger, HIT domain containing 2 [Source:MGI Symbol;Acc:MGI:1352481]	0.0145087
ENSMUSG00000027131	2401.69	-0.242447	0.0702461	-3.4514	0.000557692	0.0110132	Emc4	2	112193356	112198372	-1	ER membrane protein complex subunit 4 [Source:MGI Symbol;Acc:MGI:1915282]	0.0146483
ENSMUSG00000024055	315.369	0.564468	0.163587	3.45057	0.000559402	0.0110331	Cyp4f13	17	33143662	33166376	-1	cytochrome P450, family 4, subfamily f, polypeptide 13 [Source:MGI Symbol;Acc:MGI:2158641]	0.0146749
ENSMUSG00000067653	44.5257	1.57208	0.455708	3.44975	0.000561102	0.0110528	Ankrd23	1	36569269	36575964	-1	ankyrin repeat domain 23 [Source:MGI Symbol;Acc:MGI:1925571]	0.0147012
ENSMUSG00000060012	1325.01	0.308513	0.08944	3.44939	0.000561859	0.0110539	Kif13b	14	64884714	65047066	1	kinesin family member 13B [Source:MGI Symbol;Acc:MGI:1098265]	0.0147027
ENSMUSG00000092274	2388.49	1.29396	0.375354	3.44731	0.000566207	0.0111255	Neat1	19	5874736	5895506	-1	nuclear paraspeckle assembly transcript 1 (non-protein coding) [Source:MGI Symbol;Acc:MGI:1914211]	0.014798
ENSMUSG00000001123	1719.3	-0.331875	0.0962897	-3.44663	0.000567618	0.0111282	Lgals9	11	78853800	78875772	-1	lectin, galactose binding, soluble 9 [Source:MGI Symbol;Acc:MGI:109496]	0.0148018
ENSMUSG00000050761	207.326	-0.623362	0.180865	-3.44657	0.000567757	0.0111282	Gp1bb	16	18439067	18441153	-1	glycoprotein Ib, beta polypeptide [Source:MGI Symbol;Acc:MGI:107852]	0.0148018
ENSMUSG00000022641	1098.39	-0.246196	0.0714534	-3.44554	0.00056992	0.0111567	Bbx	16	50012207	50252753	-1	bobby sox HMG box containing [Source:MGI Symbol;Acc:MGI:1917758]	0.0148398
ENSMUSG00000001416	6108.22	-0.167249	0.0485527	-3.4447	0.000571696	0.0111775	Cct3	3	88204423	88229074	1	chaperonin containing Tcp1, subunit 3 (gamma) [Source:MGI Symbol;Acc:MGI:104708]	0.0148676
ENSMUSG00000083380	940.034	-0.449502	0.130549	-3.44317	0.000574943	0.0112271	Ndufb4c	15	73681356	73681745	-1	NADH:ubiquinone oxidoreductase subunit B4C [Source:MGI Symbol;Acc:MGI:3781422]	0.0149336
ENSMUSG00000010054	3107.05	-0.167481	0.048651	-3.4425	0.000576362	0.0112409	Tusc2	9	107440454	107443311	1	tumor suppressor 2, mitochondrial calcium regulator [Source:MGI Symbol;Acc:MGI:1931086]	0.014952
ENSMUSG00000024511	2046.74	-0.301092	0.0875423	-3.43939	0.00058303	0.011349	Rab27b	18	70112202	70274676	-1	RAB27B, member RAS oncogene family [Source:MGI Symbol;Acc:MGI:1931295]	0.015096
ENSMUSG00000070934	2855.16	-0.19028	0.0553262	-3.43924	0.000583349	0.011349	Rraga	4	86493905	86495522	1	Ras-related GTP binding A [Source:MGI Symbol;Acc:MGI:1915691]	0.015096
ENSMUSG00000025401	863.085	0.308975	0.0898825	3.43754	0.000587029	0.0113874	Myo1a	10	127541039	127556809	1	myosin IA [Source:MGI Symbol;Acc:MGI:107732]	0.0151475
ENSMUSG00000020776	767.608	0.3734	0.108637	3.43712	0.000587933	0.0113874	Fbf1	11	116033111	116058992	-1	Fas (TNFRSF6) binding factor 1 [Source:MGI Symbol;Acc:MGI:1922033]	0.0151475
ENSMUSG00000018068	344.679	0.527119	0.153361	3.43712	0.000587934	0.0113874	Ints2	11	86101507	86148401	-1	integrator complex subunit 2 [Source:MGI Symbol;Acc:MGI:1917672]	0.0151475
ENSMUSG00000031706	302.625	0.486846	0.141649	3.43699	0.000588216	0.0113874	Rfx1	8	84793463	84823621	1	regulatory factor X, 1 (influences HLA class II expression) [Source:MGI Symbol;Acc:MGI:105982]	0.0151475
ENSMUSG00000038633	5937.29	-0.156118	0.0454354	-3.43604	0.000590293	0.0114135	Degs1	1	182103337	182110369	-1	delta(4)-desaturase, sphingolipid 1 [Source:MGI Symbol;Acc:MGI:1097711]	0.0151824
ENSMUSG00000016319	5824.84	-0.167019	0.0486244	-3.43487	0.000592835	0.011435	Slc25a5	X	36059304	36062460	1	solute carrier family 25 (mitochondrial carrier, adenine nucleotide translocator), member 5 [Source:MGI Symbol;Acc:MGI:1353496]	0.0152111
ENSMUSG00000046056	34.4079	2.1239	0.618338	3.43486	0.000592856	0.011435	Sbsn	7	30450896	30455559	1	suprabasin [Source:MGI Symbol;Acc:MGI:2446326]	0.0152111
ENSMUSG00000067870	727.601	-0.34514	0.100499	-3.43425	0.000594205	0.011447	Rpl31-ps8	15	90648482	90648859	-1	ribosomal protein L31, pseudogene 8 [Source:MGI Symbol;Acc:MGI:3647726]	0.0152271
ENSMUSG00000007029	2297.99	0.207626	0.0606286	3.42456	0.000615793	0.0118484	Vars	17	35219963	35235298	1	valyl-tRNA synthetase [Source:MGI Symbol;Acc:MGI:90675]	0.0157612
ENSMUSG00000078812	9215.95	-0.148479	0.0433653	-3.42392	0.000617253	0.011862	Eif5a	11	69807540	69812784	-1	eukaryotic translation initiation factor 5A [Source:MGI Symbol;Acc:MGI:106248]	0.0157793
ENSMUSG00000028478	6024.34	-0.168286	0.0491632	-3.42301	0.00061932	0.0118872	Clta	4	44004452	44032846	1	clathrin, light polypeptide (Lca) [Source:MGI Symbol;Acc:MGI:894297]	0.015813
ENSMUSG00000050052	1240.93	-0.251668	0.0735377	-3.4223	0.000620946	0.0119039	Tdrp	8	14002008	14025032	-1	testis development related protein [Source:MGI Symbol;Acc:MGI:1919398]	0.0158353
ENSMUSG00000022822	7306.9	0.272275	0.0795718	3.42175	0.000622195	0.0119133	Abcc5	16	20150053	20245144	-1	ATP-binding cassette, sub-family C (CFTR/MRP), member 5 [Source:MGI Symbol;Acc:MGI:1351644]	0.0158479
ENSMUSG00000004098	5111.32	0.703805	0.205791	3.42001	0.000626195	0.0119753	Col5a3	9	20681346	20726363	-1	collagen, type V, alpha 3 [Source:MGI Symbol;Acc:MGI:1858212]	0.0159305
ENSMUSG00000026200	161.149	0.55707	0.162947	3.41872	0.000629159	0.0120174	Glb1l	1	75174880	75187457	-1	galactosidase, beta 1-like [Source:MGI Symbol;Acc:MGI:1921827]	0.0159866
ENSMUSG00000018076	790.51	0.274636	0.0803735	3.41699	0.000633171	0.0120794	Med13l	5	118698744	118903503	1	mediator complex subunit 13-like [Source:MGI Symbol;Acc:MGI:2670178]	0.0160691
ENSMUSG00000025375	8744.13	0.335346	0.0981551	3.41649	0.000634347	0.0120872	Aatk	11	119898139	119937993	-1	apoptosis-associated tyrosine kinase [Source:MGI Symbol;Acc:MGI:1197518]	0.0160796
ENSMUSG00000029833	785.853	0.299357	0.0876685	3.41465	0.000638642	0.0121543	Trim24	6	37847746	37943231	1	tripartite motif-containing 24 [Source:MGI Symbol;Acc:MGI:109275]	0.0161689
ENSMUSG00000028894	896.241	0.413033	0.121039	3.41241	0.000643906	0.0122342	Inpp5b	4	124635643	124695304	1	inositol polyphosphate-5-phosphatase B [Source:MGI Symbol;Acc:MGI:103257]	0.0162755
ENSMUSG00000045763	5417.55	-0.194263	0.056932	-3.41219	0.000644423	0.0122342	Basp1	15	25363363	25413850	-1	brain abundant, membrane attached signal protein 1 [Source:MGI Symbol;Acc:MGI:1917600]	0.0162755
ENSMUSG00000031144	20587.8	-0.151883	0.044516	-3.41188	0.000645172	0.0122342	Syp	X	7504710	7519495	1	synaptophysin [Source:MGI Symbol;Acc:MGI:98467]	0.0162755
ENSMUSG00000049504	615.519	0.39099	0.114678	3.40945	0.000650939	0.012314	Proser1	3	53371087	53389176	1	proline and serine rich 1 [Source:MGI Symbol;Acc:MGI:1919933]	0.0163819
ENSMUSG00000022193	3236.32	-0.241715	0.0708958	-3.40945	0.000650946	0.012314	Psmb5	14	54851576	54855479	-1	proteasome (prosome, macropain) subunit, beta type 5 [Source:MGI Symbol;Acc:MGI:1194513]	0.0163819
ENSMUSG00000106864	1264.5	0.386852	0.113479	3.409	0.000652006	0.0123192	Gtf3c2	5	31313349	31337488	-1	general transcription factor IIIC, polypeptide 2, beta [Source:MGI Symbol;Acc:MGI:1919002]	0.016389
ENSMUSG00000052406	841.43	0.366979	0.107688	3.40778	0.00065493	0.0123596	Rexo4	2	26843575	26854398	-1	REX4, 3'-5' exonuclease [Source:MGI Symbol;Acc:MGI:2684957]	0.0164428
ENSMUSG00000039166	254.401	0.482642	0.141654	3.40718	0.000656369	0.012372	Akap7	10	25044988	25183768	-1	A kinase (PRKA) anchor protein 7 [Source:MGI Symbol;Acc:MGI:1859150]	0.0164593
ENSMUSG00000017734	847.242	-0.321703	0.0944736	-3.40521	0.000661128	0.0124468	Dbndd2	2	164328026	164335239	1	dysbindin (dystrobrevin binding protein 1) domain containing 2 [Source:MGI Symbol;Acc:MGI:106562]	0.0165589
ENSMUSG00000032518	6228.59	-0.224682	0.0659954	-3.40451	0.000662819	0.0124516	Rpsa	9	119956755	119961435	1	ribosomal protein SA [Source:MGI Symbol;Acc:MGI:105381]	0.0165656
ENSMUSG00000025630	4220.99	-0.258167	0.0758332	-3.40441	0.000663073	0.0124516	Hprt	X	52077014	52110536	1	hypoxanthine guanine phosphoribosyl transferase [Source:MGI Symbol;Acc:MGI:96217]	0.0165656
ENSMUSG00000024561	992.319	0.304826	0.089546	3.40413	0.000663759	0.0124516	Mbd1	18	74400676	74415803	1	methyl-CpG binding domain protein 1 [Source:MGI Symbol;Acc:MGI:1333811]	0.0165656
ENSMUSG00000026269	398.219	0.6036	0.177348	3.40348	0.000665344	0.0124665	Rnpepl1	1	92838505	92852106	1	arginyl aminopeptidase (aminopeptidase B)-like 1 [Source:MGI Symbol;Acc:MGI:1914170]	0.0165855
ENSMUSG00000038593	751.208	0.47291	0.139	3.40224	0.000668365	0.0125082	Tctn1	5	122375911	122402523	-1	tectonic family member 1 [Source:MGI Symbol;Acc:MGI:3603820]	0.0166411
ENSMUSG00000022234	6016.44	-0.165268	0.0486014	-3.40048	0.000672672	0.0125738	Cct5	15	31590946	31601950	-1	chaperonin containing Tcp1, subunit 5 (epsilon) [Source:MGI Symbol;Acc:MGI:107185]	0.0167285
ENSMUSG00000060147	15170.1	-0.189977	0.0558984	-3.39862	0.00067727	0.0126448	Serpinb6a	13	34101901	34186777	-1	serine (or cysteine) peptidase inhibitor, clade B, member 6a [Source:MGI Symbol;Acc:MGI:103123]	0.016823
ENSMUSG00000047261	5915.15	-0.255479	0.0752058	-3.39707	0.000681124	0.0127017	Gap43	16	42068805	42161014	-1	growth associated protein 43 [Source:MGI Symbol;Acc:MGI:95639]	0.0168988
ENSMUSG00000005483	2127.27	0.248918	0.0732937	3.39617	0.000683371	0.0127285	Dnajb1	8	84334822	84339282	1	DnaJ heat shock protein family (Hsp40) member B1 [Source:MGI Symbol;Acc:MGI:1931874]	0.0169346
ENSMUSG00000110779	182.663	0.498848	0.146903	3.39576	0.000684385	0.0127323	Gm48271	10	50168742	50172238	-1	predicted gene, 48271 [Source:MGI Symbol;Acc:MGI:6097695]	0.0169397
ENSMUSG00000021290	2174.84	-0.28368	0.0835504	-3.39532	0.000685494	0.0127379	Atp5mpl	12	111927809	111933411	-1	ATP synthase membrane subunit 6.8PL [Source:MGI Symbol;Acc:MGI:1917507]	0.0169472
ENSMUSG00000028234	2213.77	-0.246664	0.0726762	-3.39402	0.000688745	0.012776	Rps20	4	3831334	3835665	-1	ribosomal protein S20 [Source:MGI Symbol;Acc:MGI:1914677]	0.0169982
ENSMUSG00000032589	4806.82	-0.255243	0.0752075	-3.39385	0.000689169	0.012776	Bsn	9	107973221	108067583	-1	bassoon [Source:MGI Symbol;Acc:MGI:1277955]	0.0169982
ENSMUSG00000052146	2118.96	-0.300688	0.0886378	-3.39232	0.000693022	0.012832	Rps10	17	27849392	27855643	-1	ribosomal protein S10 [Source:MGI Symbol;Acc:MGI:1914347]	0.0170728
ENSMUSG00000021767	529.858	0.330348	0.09739	3.39201	0.000693819	0.012832	Kat6b	14	21531502	21722546	1	K(lysine) acetyltransferase 6B [Source:MGI Symbol;Acc:MGI:1858746]	0.0170728
ENSMUSG00000063804	89.047	0.852018	0.251332	3.39	0.000698914	0.012911	Lin28b	10	45252716	45362491	-1	lin-28 homolog B (C. elegans) [Source:MGI Symbol;Acc:MGI:3584032]	0.0171781
ENSMUSG00000032186	10848.6	-0.183524	0.054162	-3.38843	0.000702929	0.01297	Tmod2	9	75472903	75518607	-1	tropomodulin 2 [Source:MGI Symbol;Acc:MGI:1355335]	0.0172566
ENSMUSG00000042312	1447.01	-0.27738	0.0819284	-3.38564	0.000710117	0.0130873	S100a13	3	90421742	90431888	1	S100 calcium binding protein A13 [Source:MGI Symbol;Acc:MGI:109581]	0.0174033
ENSMUSG00000103039	9.64697	2.59172	0.765542	3.38547	0.000710557	NA	Gm37123	3	32508736	32509906	1	predicted gene, 37123 [Source:MGI Symbol;Acc:MGI:5610351]	0.0174033
ENSMUSG00000054428	3576.21	-0.248349	0.0733668	-3.38504	0.000711691	0.0131009	Atpif1	4	132257866	132260970	-1	ATPase inhibitory factor 1 [Source:MGI Symbol;Acc:MGI:1196457]	0.0174108
ENSMUSG00000034932	597.129	-0.298442	0.0881896	-3.3841	0.000714123	0.0131304	Mrpl54	10	81100547	81102768	-1	mitochondrial ribosomal protein L54 [Source:MGI Symbol;Acc:MGI:1913297]	0.01745
ENSMUSG00000029838	3295.81	-0.257268	0.0760501	-3.38288	0.000717309	0.0131735	Ptn	6	36691864	36787155	-1	pleiotrophin [Source:MGI Symbol;Acc:MGI:97804]	0.0175075
ENSMUSG00000032267	378.427	0.489255	0.144653	3.38227	0.000718896	0.0131873	Usp28	9	48896675	48953817	1	ubiquitin specific peptidase 28 [Source:MGI Symbol;Acc:MGI:2442293]	0.0175259
ENSMUSG00000116719	67.0198	0.86944	0.257109	3.3816	0.000720641	0.0132039	Gm29719	17	6407088	6462109	-1	predicted gene, 29719 [Source:MGI Symbol;Acc:MGI:5588878]	0.0175481
ENSMUSG00000009995	630.436	0.381619	0.112905	3.37999	0.000724873	0.0132546	Taz	X	73325518	73333757	1	tafazzin [Source:MGI Symbol;Acc:MGI:109626]	0.0176021
ENSMUSG00000034120	2843.58	0.21121	0.0624901	3.37989	0.000725139	0.0132546	Srsf2	11	116740727	116743920	-1	serine and arginine-rich splicing factor 2 [Source:MGI Symbol;Acc:MGI:98284]	0.0176021
ENSMUSG00000074785	7058.37	-0.217403	0.0643317	-3.3794	0.000726435	0.0132546	Plxnc1	10	94626728	94780697	-1	plexin C1 [Source:MGI Symbol;Acc:MGI:1890127]	0.0176021
ENSMUSG00000021686	520.067	0.499324	0.147761	3.37927	0.000726776	0.0132546	Ap3b1	13	94495468	94702825	1	adaptor-related protein complex 3, beta 1 subunit [Source:MGI Symbol;Acc:MGI:1333879]	0.0176021
ENSMUSG00000106961	9.62683	2.59905	0.769198	3.3789	0.000727755	NA	Gm43128	2	35170402	35172022	1	predicted gene 43128 [Source:MGI Symbol;Acc:MGI:5663265]	0.0176021
ENSMUSG00000032769	1099.75	-0.33983	0.100583	-3.37859	0.000728585	0.0132593	Trpa1	1	14942872	14989086	-1	transient receptor potential cation channel, subfamily A, member 1 [Source:MGI Symbol;Acc:MGI:3522699]	0.0176021
ENSMUSG00000049649	167.188	0.520781	0.154144	3.37854	0.000728716	0.0132593	Gpr3	4	132936651	132939847	-1	G-protein coupled receptor 3 [Source:MGI Symbol;Acc:MGI:101908]	0.0176021
ENSMUSG00000022710	4169.51	0.184771	0.0547072	3.37745	0.000731615	0.0132966	Usp7	16	8507459	8610172	-1	ubiquitin specific peptidase 7 [Source:MGI Symbol;Acc:MGI:2182061]	0.0176519
ENSMUSG00000021240	514.146	0.439334	0.130093	3.37709	0.000732568	0.0132986	Abcd4	12	84648238	84664187	-1	ATP-binding cassette, sub-family D (ALD), member 4 [Source:MGI Symbol;Acc:MGI:1349217]	0.0176546
ENSMUSG00000024220	1116.07	0.277627	0.0822226	3.37653	0.000734054	0.0133102	Zfp523	17	28396103	28424860	1	zinc finger protein 523 [Source:MGI Symbol;Acc:MGI:2687278]	0.0176702
ENSMUSG00000021432	301.194	0.505174	0.149635	3.37605	0.000735358	0.0133185	Slc35b3	13	39116112	39144851	-1	solute carrier family 35, member B3 [Source:MGI Symbol;Acc:MGI:1913978]	0.0176814
ENSMUSG00000106927	5.53012	4.77926	1.41578	3.37571	0.000736248	NA	Gm43598	5	150520527	150523005	-1	predicted gene 43598 [Source:MGI Symbol;Acc:MGI:5663735]	0.0176826
ENSMUSG00000028347	627.221	-0.323397	0.0958551	-3.37381	0.000741345	0.0134115	Tmeff1	4	48585174	48663131	1	transmembrane protein with EGF-like and two follistatin-like domains 1 [Source:MGI Symbol;Acc:MGI:1926810]	0.0177847
ENSMUSG00000040943	245.658	0.742541	0.220314	3.37037	0.000750671	0.0135456	Tet2	3	133169440	133250900	-1	tet methylcytosine dioxygenase 2 [Source:MGI Symbol;Acc:MGI:2443298]	0.0179634
ENSMUSG00000002910	437.041	0.376477	0.111709	3.37015	0.000751267	0.0135456	Arrdc2	8	71287773	71292364	-1	arrestin domain containing 2 [Source:MGI Symbol;Acc:MGI:1918057]	0.0179634
ENSMUSG00000025503	3213.67	-0.173481	0.0514819	-3.36974	0.000752388	0.0135456	Taldo1	7	140972112	140982881	1	transaldolase 1 [Source:MGI Symbol;Acc:MGI:1274789]	0.0179634
ENSMUSG00000024871	32.1433	1.5204	0.451221	3.36953	0.000752968	0.0135456	Doc2g	19	4053313	4057005	1	double C2, gamma [Source:MGI Symbol;Acc:MGI:1926250]	0.0179634
ENSMUSG00000045128	3868.03	-0.189716	0.0563046	-3.36947	0.000753135	0.0135456	Rpl18a	8	71347366	71350056	-1	ribosomal protein L18A [Source:MGI Symbol;Acc:MGI:1924058]	0.0179634
ENSMUSG00000032198	319.833	0.79099	0.234772	3.36918	0.00075392	0.0135456	Dock6	9	21711156	21763931	-1	dedicator of cytokinesis 6 [Source:MGI Symbol;Acc:MGI:1914789]	0.0179634
ENSMUSG00000006014	21.6176	1.65572	0.491613	3.36792	0.000757364	0.013592	Prg4	1	150325163	150341916	-1	proteoglycan 4 (megakaryocyte stimulating factor, articular superficial zone protein) [Source:MGI Symbol;Acc:MGI:1891344]	0.0180251
ENSMUSG00000073374	18.2633	2.20477	0.65482	3.36699	0.000759947	0.0136228	C030034I22Rik	17	69724397	69728627	1	RIKEN cDNA C030034I22 gene [Source:MGI Symbol;Acc:MGI:1924783]	0.0180661
ENSMUSG00000074884	5036.15	-0.164937	0.0490043	-3.36577	0.000763301	0.0136673	Serf2	2	121279676	121288794	1	small EDRK-rich factor 2 [Source:MGI Symbol;Acc:MGI:1337041]	0.0181254
ENSMUSG00000025860	2656.25	-0.169956	0.0505484	-3.36224	0.000773133	0.0138201	Xiap	X	41148556	41198533	1	X-linked inhibitor of apoptosis [Source:MGI Symbol;Acc:MGI:107572]	0.0183283
ENSMUSG00000007815	4736.84	-0.170299	0.050653	-3.36208	0.00077359	0.0138201	Rhoa	9	108183328	108215133	1	ras homolog family member A [Source:MGI Symbol;Acc:MGI:1096342]	0.0183283
ENSMUSG00000102780	10.113	2.50524	0.745545	3.36028	0.000778626	NA	Gm38253	3	106632915	106637592	1	predicted gene, 38253 [Source:MGI Symbol;Acc:MGI:5611481]	0.0184269
ENSMUSG00000051839	12.8434	2.61976	0.780338	3.35721	0.000787333	NA	Gypa	8	81220410	81237171	1	glycophorin A [Source:MGI Symbol;Acc:MGI:95880]	0.018612
ENSMUSG00000036473	636.39	0.428227	0.127634	3.35513	0.000793284	0.0141559	Tbc1d24	17	24394405	24424536	-1	TBC1 domain family, member 24 [Source:MGI Symbol;Acc:MGI:2443456]	0.0187317
ENSMUSG00000072294	252.16	0.482405	0.143872	3.35302	0.000799336	0.0142477	Klf12	14	100108068	100522115	-1	Kruppel-like factor 12 [Source:MGI Symbol;Acc:MGI:1333796]	0.0188534
ENSMUSG00000006333	3799.07	-0.27378	0.0817632	-3.34846	0.000812633	0.0144684	Rps9	7	3706992	3709896	1	ribosomal protein S9 [Source:MGI Symbol;Acc:MGI:1924096]	0.0191456
ENSMUSG00000076617	1018.55	0.35917	0.107286	3.34778	0.000814614	0.0144742	Ighm	12	113382178	113386350	-1	immunoglobulin heavy constant mu [Source:MGI Symbol;Acc:MGI:96448]	0.0191538
ENSMUSG00000060216	1148.88	0.26362	0.0787462	3.34772	0.000814802	0.0144742	Arrb2	11	70323461	70331654	1	arrestin, beta 2 [Source:MGI Symbol;Acc:MGI:99474]	0.0191538
ENSMUSG00000107215	17.7221	1.74709	0.522034	3.3467	0.00081781	0.0145113	Gm43197	6	3336772	3339354	-1	predicted gene 43197 [Source:MGI Symbol;Acc:MGI:5663334]	0.019203
ENSMUSG00000118239	46.0772	1.3522	0.404266	3.34483	0.000823316	0.0145925	Gm50107	17	31786137	31787828	1	predicted gene, 50107 [Source:MGI Symbol;Acc:MGI:6302841]	0.0193108
ENSMUSG00000032324	6530.26	-0.164125	0.0490961	-3.34292	0.000829004	0.0146768	Tspan3	9	56039009	56072761	-1	tetraspanin 3 [Source:MGI Symbol;Acc:MGI:1928098]	0.0194225
ENSMUSG00000022427	1314.05	-0.216161	0.0647739	-3.33716	0.000846387	0.0149677	Tomm22	15	79555062	79557601	1	translocase of outer mitochondrial membrane 22 [Source:MGI Symbol;Acc:MGI:2450248]	0.0198077
ENSMUSG00000030741	949.41	0.297292	0.0891092	3.33627	0.000849121	0.0149992	Spns1	7	125969232	125976622	-1	spinster homolog 1 [Source:MGI Symbol;Acc:MGI:1920908]	0.0198496
ENSMUSG00000056394	413.627	0.351536	0.105402	3.3352	0.00085239	0.0150169	Lig1	7	13011239	13045350	1	ligase I, DNA, ATP-dependent [Source:MGI Symbol;Acc:MGI:101789]	0.0198737
ENSMUSG00000001025	5906.14	-0.297927	0.0893332	-3.33501	0.000852955	0.0150169	S100a6	3	90520189	90531488	1	S100 calcium binding protein A6 (calcyclin) [Source:MGI Symbol;Acc:MGI:1339467]	0.0198737
ENSMUSG00000036880	1774.37	-0.220242	0.0660394	-3.335	0.000852985	0.0150169	Acaa2	18	74912268	74939279	1	acetyl-Coenzyme A acyltransferase 2 (mitochondrial 3-oxoacyl-Coenzyme A thiolase) [Source:MGI Symbol;Acc:MGI:1098623]	0.0198737
ENSMUSG00000090841	9873.48	-0.174203	0.0522728	-3.33258	0.000860446	0.0151313	Myl6	10	128326729	128330014	-1	myosin, light polypeptide 6, alkali, smooth muscle and non-muscle [Source:MGI Symbol;Acc:MGI:109318]	0.0200254
ENSMUSG00000004677	1277.3	0.516773	0.155088	3.33212	0.000861855	0.0151392	Myo9b	8	71725358	71813357	1	myosin IXb [Source:MGI Symbol;Acc:MGI:106624]	0.020036
ENSMUSG00000025723	2576.34	-0.254637	0.0764596	-3.33035	0.000867373	0.0152066	Nmb	7	80551975	80554824	-1	neuromedin B [Source:MGI Symbol;Acc:MGI:1915289]	0.0201256
ENSMUSG00000038534	587.868	0.454458	0.136463	3.33027	0.000867622	0.0152066	Osbpl7	11	96941454	96959730	1	oxysterol binding protein-like 7 [Source:MGI Symbol;Acc:MGI:1918490]	0.0201256
ENSMUSG00000032418	5032.23	-0.184358	0.0553696	-3.32958	0.000869771	0.0152273	Me1	9	86463424	86578006	-1	malic enzyme 1, NADP(+)-dependent, cytosolic [Source:MGI Symbol;Acc:MGI:97043]	0.0201532
ENSMUSG00000039197	4543.4	-0.199091	0.0598061	-3.32894	0.000871763	0.0152362	Adk	14	21102642	21498637	1	adenosine kinase [Source:MGI Symbol;Acc:MGI:87930]	0.0201654
ENSMUSG00000110773	42.0141	1.21565	0.365191	3.3288	0.000872215	0.0152362	Gm39326	9	44789189	44795695	1	predicted gene, 39326 [Source:MGI Symbol;Acc:MGI:5622211]	0.0201654
ENSMUSG00000118458	87.5578	0.95193	0.286052	3.32783	0.000875267	0.0152725	Gm10599	4	42242630	42244913	1	predicted pseudogene 10599 [Source:MGI Symbol;Acc:MGI:3710582]	0.0202138
ENSMUSG00000062729	296.797	0.62215	0.187064	3.32586	0.000881458	0.0153635	Ppox	1	171103563	171108760	-1	protoporphyrinogen oxidase [Source:MGI Symbol;Acc:MGI:104968]	0.0203344
ENSMUSG00000021361	913.918	-0.296044	0.0890465	-3.3246	0.000885468	0.0154164	Tmem14c	13	41169768	41176062	1	transmembrane protein 14C [Source:MGI Symbol;Acc:MGI:1913404]	0.0204046
ENSMUSG00000023206	106.923	0.677645	0.203878	3.32378	0.000888072	0.0154446	Il15ra	2	11710101	11739128	1	interleukin 15 receptor, alpha chain [Source:MGI Symbol;Acc:MGI:104644]	0.0204422
ENSMUSG00000024392	5342.62	0.211315	0.0635863	3.32328	0.000889664	0.0154552	Bag6	17	35354154	35366298	1	BCL2-associated athanogene 6 [Source:MGI Symbol;Acc:MGI:1919439]	0.0204564
ENSMUSG00000028445	884.737	-0.260712	0.0784766	-3.32216	0.000893232	0.0155001	Enho	4	41638144	41640324	-1	energy homeostasis associated [Source:MGI Symbol;Acc:MGI:1916888]	0.0205161
ENSMUSG00000040652	5166.23	-0.177002	0.0533134	-3.32004	0.00090005	0.0156012	Oaz2	9	65575283	65597582	1	ornithine decarboxylase antizyme 2 [Source:MGI Symbol;Acc:MGI:109492]	0.0206501
ENSMUSG00000032607	105.211	1.04616	0.315223	3.3188	0.000904059	0.015653	Amt	9	108174052	108179501	1	aminomethyltransferase [Source:MGI Symbol;Acc:MGI:3646700]	0.0207192
ENSMUSG00000024793	21.0779	1.71731	0.517495	3.3185	0.000905029	0.015653	Tnfrsf25	4	152200391	152204576	1	tumor necrosis factor receptor superfamily, member 25 [Source:MGI Symbol;Acc:MGI:1934667]	0.0207192
ENSMUSG00000103183	106	0.750525	0.226232	3.31751	0.000908244	0.0156796	Gm37090	4	156103013	156107117	-1	predicted gene, 37090 [Source:MGI Symbol;Acc:MGI:5610318]	0.0207548
ENSMUSG00000047139	16902.3	-0.213546	0.0643711	-3.31741	0.000908558	0.0156796	Cd24a	10	43454280	43460261	1	CD24a antigen [Source:MGI Symbol;Acc:MGI:88323]	0.0207548
ENSMUSG00000022340	2621.32	-0.185777	0.0560317	-3.31556	0.000914586	0.0157569	Sybu	15	44535252	44651459	-1	syntabulin (syntaxin-interacting) [Source:MGI Symbol;Acc:MGI:2442392]	0.0208576
ENSMUSG00000030751	2670.34	-0.175308	0.0528765	-3.31542	0.000915043	0.0157569	Psma1	7	113863841	113875353	-1	proteasome subunit alpha 1 [Source:MGI Symbol;Acc:MGI:1347005]	0.0208576
ENSMUSG00000062110	499.914	-0.323507	0.0975854	-3.31512	0.000916043	0.0157569	Scfd2	5	74365477	74692420	-1	Sec1 family domain containing 2 [Source:MGI Symbol;Acc:MGI:2443446]	0.0208578
ENSMUSG00000055302	6166.28	-0.171523	0.0517522	-3.31431	0.000918687	0.0157852	Mrfap1	5	36952211	36954116	-1	Morf4 family associated protein 1 [Source:MGI Symbol;Acc:MGI:1914818]	0.0208954
ENSMUSG00000022295	4368.05	-0.162891	0.0491628	-3.31329	0.000922057	0.0158258	Atp6v1c1	15	38662177	38692690	1	ATPase, H+ transporting, lysosomal V1 subunit C1 [Source:MGI Symbol;Acc:MGI:1913585]	0.0209494
ENSMUSG00000104018	6.23618	4.05403	1.22395	3.31224	0.000925532	NA	4833412K13Rik	1	78442085	78443563	-1	RIKEN cDNA 4833412K13 gene [Source:MGI Symbol;Acc:MGI:1921857]	0.0209867
ENSMUSG00000002985	88003.3	-0.31242	0.0943242	-3.31219	0.000925694	0.0158709	Apoe	7	19430034	19433113	-1	apolipoprotein E [Source:MGI Symbol;Acc:MGI:88057]	0.0209867
ENSMUSG00000026385	3642.19	-0.373519	0.112792	-3.31157	0.000927747	0.0158888	Dbi	1	120041010	120048808	-1	diazepam binding inhibitor [Source:MGI Symbol;Acc:MGI:94865]	0.0210106
ENSMUSG00000036748	3210.95	-0.188299	0.0568705	-3.31101	0.000929607	0.0159034	Cuedc2	19	46318251	46327141	-1	CUE domain containing 2 [Source:MGI Symbol;Acc:MGI:1914366]	0.0210301
ENSMUSG00000079499	891.981	0.29637	0.0895472	3.30965	0.000934111	0.0159552	6530402F18Rik	2	29135119	29143018	-1	RIKEN cDNA 6530402F18 gene [Source:MGI Symbol;Acc:MGI:1923470]	0.0210992
ENSMUSG00000022865	37.3309	1.18464	0.357953	3.30949	0.000934667	0.0159552	Cxadr	16	78098377	78156662	1	coxsackie virus and adenovirus receptor [Source:MGI Symbol;Acc:MGI:1201679]	0.0210992
ENSMUSG00000103046	13.8615	2.55777	0.773191	3.30808	0.000939391	0.0160185	Gm37309	1	39031759	39033397	1	predicted gene, 37309 [Source:MGI Symbol;Acc:MGI:5610537]	0.0211831
ENSMUSG00000022024	3779.81	-0.228622	0.0691373	-3.30678	0.000943755	0.0160755	Sugt1	14	79825131	79872636	1	SGT1, suppressor of G2 allele of SKP1 (S. cerevisiae) [Source:MGI Symbol;Acc:MGI:1915205]	0.0212587
ENSMUSG00000037210	1265.94	0.272587	0.0824563	3.30583	0.000946959	0.0161126	Fam193a	5	34527277	34643800	1	family with sequence homology 193, member A [Source:MGI Symbol;Acc:MGI:2447768]	0.0213081
ENSMUSG00000062933	7148.07	-0.208906	0.0632322	-3.30379	0.000953881	0.0162129	Gm10123	9	96777711	96778200	1	predicted pseudogene 10123 [Source:MGI Symbol;Acc:MGI:3704342]	0.0214409
ENSMUSG00000015759	3312.47	-0.21107	0.0638998	-3.30313	0.00095611	0.0162332	Cnih1	14	47013024	47025868	-1	cornichon family AMPA receptor auxiliary protein 1 [Source:MGI Symbol;Acc:MGI:1277202]	0.0214579
ENSMUSG00000115632	11.107	2.28016	0.690337	3.30297	0.000956674	NA	Gm17922	14	93439536	93440337	-1	predicted gene, 17922 [Source:MGI Symbol;Acc:MGI:5010107]	0.0214579
ENSMUSG00000039781	490.809	0.430036	0.130241	3.30184	0.000960523	0.0162906	Cep131	11	119955256	119977653	-1	centrosomal protein 131 [Source:MGI Symbol;Acc:MGI:107440]	0.0215212
ENSMUSG00000025510	5978.08	-0.146761	0.0444669	-3.30046	0.000965263	0.0163534	Cd151	7	141047305	141051386	1	CD151 antigen [Source:MGI Symbol;Acc:MGI:1096360]	0.0216044
ENSMUSG00000021477	18827	-0.233645	0.0708165	-3.2993	0.000969266	0.0164035	Ctsl	13	64507151	64518704	-1	cathepsin L [Source:MGI Symbol;Acc:MGI:88564]	0.021671
ENSMUSG00000051451	1468.99	0.346518	0.105055	3.29844	0.00097222	0.0164358	Crebzf	7	90091937	90097202	1	CREB/ATF bZIP transcription factor [Source:MGI Symbol;Acc:MGI:2675296]	0.0217139
ENSMUSG00000029066	1012.57	-0.297029	0.0900731	-3.29764	0.000975001	0.0164652	Mrpl20	4	155887335	155894432	1	mitochondrial ribosomal protein L20 [Source:MGI Symbol;Acc:MGI:2137221]	0.021753
ENSMUSG00000071528	1801.48	-0.416685	0.126372	-3.29728	0.000976257	0.0164687	Atp5md	19	47071903	47079086	-1	ATP synthase membrane subunit DAPIT [Source:MGI Symbol;Acc:MGI:1891435]	0.0217579
ENSMUSG00000104037	6.20695	4.04384	1.2269	3.29599	0.000980769	NA	Gm37776	3	65585807	65588303	1	predicted gene, 37776 [Source:MGI Symbol;Acc:MGI:5611004]	0.0218353
ENSMUSG00000050711	9850.89	-0.262613	0.0797054	-3.2948	0.000984928	0.0165972	Scg2	1	79412386	79417837	-1	secretogranin II [Source:MGI Symbol;Acc:MGI:103033]	0.0219048
ENSMUSG00000029810	2098.62	-0.233615	0.0709482	-3.29276	0.000992104	0.0167002	Tmem176b	6	48810752	48818430	-1	transmembrane protein 176B [Source:MGI Symbol;Acc:MGI:1916348]	0.0220411
ENSMUSG00000105095	33.522	1.15235	0.350009	3.29233	0.000993605	0.0167076	8430422M14Rik	3	36009585	36010406	-1	RIKEN cDNA 8430422M14 gene [Source:MGI Symbol;Acc:MGI:1925753]	0.0220511
ENSMUSG00000107997	7.41619	2.90065	0.881596	3.29023	0.00100106	NA	Gm44243	6	129517184	129517875	1	predicted gene, 44243 [Source:MGI Symbol;Acc:MGI:5690635]	0.0221932
ENSMUSG00000033365	2251.09	0.27088	0.0823704	3.28856	0.001007	0.0169148	Ipo13	4	117751683	117772196	-1	importin 13 [Source:MGI Symbol;Acc:MGI:2385205]	0.0223013
ENSMUSG00000030177	127.033	0.687004	0.208969	3.28759	0.00101049	0.0169409	Ccdc77	6	120301284	120341335	-1	coiled-coil domain containing 77 [Source:MGI Symbol;Acc:MGI:1914450]	0.0223364
ENSMUSG00000025316	475.058	0.412704	0.125536	3.28753	0.00101071	0.0169409	Banp	8	122676489	122755997	1	BTG3 associated nuclear protein [Source:MGI Symbol;Acc:MGI:1889023]	0.0223364
ENSMUSG00000027176	646.929	0.332538	0.10117	3.28692	0.00101291	0.016956	Cstf3	2	104420868	104495774	1	cleavage stimulation factor, 3' pre-RNA, subunit 3 [Source:MGI Symbol;Acc:MGI:1351825]	0.0223569
ENSMUSG00000024725	4279.83	-0.176578	0.0537254	-3.28668	0.00101376	0.016956	Ostf1	19	18493501	18609187	-1	osteoclast stimulating factor 1 [Source:MGI Symbol;Acc:MGI:700012]	0.0223569
ENSMUSG00000020241	321.498	1.39604	0.424932	3.28532	0.00101866	0.0170133	Col6a2	10	76431596	76459464	-1	collagen, type VI, alpha 2 [Source:MGI Symbol;Acc:MGI:88460]	0.0224334
ENSMUSG00000017404	5525.54	-0.29729	0.0904976	-3.28506	0.00101961	0.0170133	Rpl19	11	97917536	97921318	1	ribosomal protein L19 [Source:MGI Symbol;Acc:MGI:98020]	0.0224334
ENSMUSG00000022540	1461.39	0.204459	0.0622432	3.28483	0.00102043	0.0170133	Rogdi	16	4826594	4831417	-1	rogdi homolog [Source:MGI Symbol;Acc:MGI:1913299]	0.0224334
ENSMUSG00000071648	389.897	-0.370415	0.11286	-3.28206	0.00103052	0.0171634	Rom1	19	8904755	8906720	-1	rod outer segment membrane protein 1 [Source:MGI Symbol;Acc:MGI:97998]	0.0226317
ENSMUSG00000059412	7911.83	-0.273684	0.0834376	-3.28011	0.00103767	0.0172642	Fxyd2	9	45310967	45321576	1	FXYD domain-containing ion transport regulator 2 [Source:MGI Symbol;Acc:MGI:1195260]	0.022765
ENSMUSG00000026755	1193.27	-0.253743	0.0774483	-3.27629	0.00105181	0.0174809	Arpc5l	2	38895360	38905889	1	actin related protein 2/3 complex, subunit 5-like [Source:MGI Symbol;Acc:MGI:1921442]	0.0230511
ENSMUSG00000022528	267.514	0.491651	0.150081	3.27592	0.0010532	0.0174856	Hes1	16	29883202	29886614	1	hes family bHLH transcription factor 1 [Source:MGI Symbol;Acc:MGI:104853]	0.0230576
ENSMUSG00000027506	7650.19	-0.153649	0.0469162	-3.27497	0.00105675	0.0175032	Tpd52	3	8990653	9069783	-1	tumor protein D52 [Source:MGI Symbol;Acc:MGI:107749]	0.0230818
ENSMUSG00000045903	22.3556	1.49124	0.45535	3.27493	0.00105686	0.0175032	Npas4	19	5034383	5040344	-1	neuronal PAS domain protein 4 [Source:MGI Symbol;Acc:MGI:2664186]	0.0230818
ENSMUSG00000027602	9851.02	-0.158891	0.0485201	-3.27474	0.0010576	0.0175032	Map1lc3a	2	155118217	155119993	1	microtubule-associated protein 1 light chain 3 alpha [Source:MGI Symbol;Acc:MGI:1915661]	0.0230818
ENSMUSG00000041607	4209.21	-0.276994	0.0846129	-3.27366	0.00106163	0.0175445	Mbp	18	82493271	82603762	1	myelin basic protein [Source:MGI Symbol;Acc:MGI:96925]	0.0231369
ENSMUSG00000058057	1707.27	-0.23006	0.0702798	-3.27348	0.00106232	0.0175445	Mettl7a3	15	100232810	100238256	1	methyltransferase like 7A3 [Source:MGI Symbol;Acc:MGI:3710670]	0.0231369
ENSMUSG00000026648	266.216	0.482994	0.147686	3.2704	0.00107395	0.0177179	Dclre1c	2	3425168	3465167	1	DNA cross-link repair 1C [Source:MGI Symbol;Acc:MGI:2441769]	0.0233659
ENSMUSG00000063954	148.871	-0.758366	0.231963	-3.26934	0.00107797	0.017759	H2ac19	3	96147065	96147592	-1	H2A clustered histone 19 [Source:MGI Symbol;Acc:MGI:2448283]	0.0234211
ENSMUSG00000036560	3097.17	0.396079	0.121162	3.269	0.00107928	0.017759	Lgi4	7	30758767	30770360	1	leucine-rich repeat LGI family, member 4 [Source:MGI Symbol;Acc:MGI:2180197]	0.0234211
ENSMUSG00000039579	768.59	-0.283234	0.0866462	-3.26886	0.00107983	0.017759	Grin3a	4	49661611	49845744	-1	glutamate receptor ionotropic, NMDA3A [Source:MGI Symbol;Acc:MGI:1933206]	0.0234211
ENSMUSG00000002844	2995.63	-0.18243	0.0558804	-3.26466	0.00109596	0.0179872	Adprh	16	38264392	38273065	-1	ADP-ribosylarginine hydrolase [Source:MGI Symbol;Acc:MGI:1098234]	0.0237226
ENSMUSG00000013698	10791.3	-0.171436	0.0525127	-3.26465	0.00109598	0.0179872	Pea15a	1	172024295	172034371	-1	phosphoprotein enriched in astrocytes 15A [Source:MGI Symbol;Acc:MGI:104799]	0.0237226
ENSMUSG00000022842	2922.79	0.176847	0.0541772	3.26423	0.00109761	0.0179952	Ece2	16	20448578	20465235	1	endothelin converting enzyme 2 [Source:MGI Symbol;Acc:MGI:1101356]	0.0237335
ENSMUSG00000046432	2132.8	-0.303929	0.0931712	-3.26206	0.00110607	0.018115	Bex3	X	135171002	135172727	1	brain expressed X-linked 3 [Source:MGI Symbol;Acc:MGI:1338016]	0.0238919
ENSMUSG00000060743	1609.56	-0.321582	0.0986271	-3.26058	0.00111184	0.0181905	H3f3a	1	180628397	180641508	-1	H3.3 histone A [Source:MGI Symbol;Acc:MGI:1097686]	0.0239918
ENSMUSG00000039533	3071.27	-0.27171	0.0833811	-3.25866	0.00111941	0.0182765	Mmd2	5	142548113	142594555	-1	monocyte to macrophage differentiation-associated 2 [Source:MGI Symbol;Acc:MGI:1922354]	0.0241059
ENSMUSG00000020267	4634.82	-0.257225	0.078936	-3.25865	0.00111942	0.0182765	Hint1	11	54757209	54761327	1	histidine triad nucleotide binding protein 1 [Source:MGI Symbol;Acc:MGI:1321133]	0.0241059
ENSMUSG00000002833	1252.5	0.293579	0.0901513	3.25651	0.00112791	0.018396	Hdgfl2	17	56386634	56407607	1	HDGF like 2 [Source:MGI Symbol;Acc:MGI:1194492]	0.0242638
ENSMUSG00000005779	4558.32	-0.197635	0.060709	-3.25544	0.00113217	0.0184289	Psmb4	3	94791404	94794272	-1	proteasome (prosome, macropain) subunit, beta type 4 [Source:MGI Symbol;Acc:MGI:1098257]	0.0243079
ENSMUSG00000018326	20822	-0.152898	0.0469672	-3.25542	0.00113227	0.0184289	Ywhab	2	163836880	163860508	1	tyrosine 3-monooxygenase/tryptophan 5-monooxygenase activation protein, beta polypeptide [Source:MGI Symbol;Acc:MGI:1891917]	0.0243079
ENSMUSG00000044906	240.878	0.506347	0.15557	3.25479	0.00113477	0.0184506	4930503L19Rik	18	70585283	70605580	-1	RIKEN cDNA 4930503L19 gene [Source:MGI Symbol;Acc:MGI:1922045]	0.0243368
ENSMUSG00000012848	2832.67	-0.331987	0.102011	-3.25443	0.00113621	0.0184549	Rps5	7	12656217	12660613	1	ribosomal protein S5 [Source:MGI Symbol;Acc:MGI:1097682]	0.0243429
ENSMUSG00000097042	20.1529	1.88747	0.580145	3.25344	0.00114016	0.0185	Gm17491	8	22970307	22973348	1	predicted gene, 17491 [Source:MGI Symbol;Acc:MGI:4937125]	0.0244028
ENSMUSG00000051234	2220.18	-0.260576	0.0801536	-3.25096	0.00115017	0.0186344	Rnf7	9	96352990	96360728	-1	ring finger protein 7 [Source:MGI Symbol;Acc:MGI:1337096]	0.0245806
ENSMUSG00000044018	842.712	-0.261775	0.0805265	-3.2508	0.00115081	0.0186344	Mrpl50	4	49512596	49521093	-1	mitochondrial ribosomal protein L50 [Source:MGI Symbol;Acc:MGI:107329]	0.0245806
ENSMUSG00000035559	421.188	-0.355633	0.109418	-3.25022	0.00115317	0.0186533	Mpv17l2	8	71211295	71213592	-1	MPV17 mitochondrial membrane protein-like 2 [Source:MGI Symbol;Acc:MGI:2681846]	0.0246059
ENSMUSG00000034484	2021.13	-0.188978	0.0581527	-3.24968	0.00115536	0.0186697	Snx2	18	53309388	53353937	1	sorting nexin 2 [Source:MGI Symbol;Acc:MGI:1915054]	0.0246279
ENSMUSG00000017485	1739.54	-0.257893	0.0794019	-3.24795	0.00116239	0.018764	Top2b	14	6034301	6104584	-1	topoisomerase (DNA) II beta [Source:MGI Symbol;Acc:MGI:98791]	0.0247526
ENSMUSG00000024773	1689.55	0.283784	0.0874017	3.24689	0.00116672	0.0188146	Atg2a	19	6291698	6312365	1	autophagy related 2A [Source:MGI Symbol;Acc:MGI:1916291]	0.0248197
ENSMUSG00000114282	27.8251	1.61943	0.498875	3.24616	0.00116975	0.0188441	5330431K02Rik	13	99638985	99640947	-1	RIKEN cDNA 5330431K02 gene [Source:MGI Symbol;Acc:MGI:1915439]	0.024859
ENSMUSG00000028249	12713.2	-0.186416	0.0574504	-3.24481	0.00117529	0.0189011	Sdcbp	4	6365650	6408423	1	syndecan binding protein [Source:MGI Symbol;Acc:MGI:1337026]	0.0249349
ENSMUSG00000001707	600.848	-0.291775	0.0899232	-3.24471	0.00117569	0.0189011	Eef1e1	13	38828183	38843034	-1	eukaryotic translation elongation factor 1 epsilon 1 [Source:MGI Symbol;Acc:MGI:1913393]	0.0249349
ENSMUSG00000026582	10.9016	2.57277	0.793397	3.24273	0.00118389	NA	Sele	1	163875803	163885246	1	selectin, endothelial cell [Source:MGI Symbol;Acc:MGI:98278]	0.0250834
ENSMUSG00000034525	1989.29	0.247488	0.0764042	3.23919	0.0011987	0.0192449	Ice1	13	70699826	70785753	-1	interactor of little elongation complex ELL subunit 1 [Source:MGI Symbol;Acc:MGI:2385865]	0.0253635
ENSMUSG00000067203	63.3887	0.864729	0.266974	3.23899	0.00119952	0.0192449	H2-K2	17	34193633	34197801	-1	histocompatibility 2, K region locus 2 [Source:MGI Symbol;Acc:MGI:95906]	0.0253635
ENSMUSG00000015806	2993.06	-0.181172	0.0559943	-3.23555	0.00121407	0.0194388	Qdpr	5	45591363	45607578	-1	quinoid dihydropteridine reductase [Source:MGI Symbol;Acc:MGI:97836]	0.0256198
ENSMUSG00000053693	11244.3	0.201673	0.0623304	3.23555	0.00121408	0.0194388	Mast1	8	85638532	85663988	-1	microtubule associated serine/threonine kinase 1 [Source:MGI Symbol;Acc:MGI:1861901]	0.0256198
ENSMUSG00000060601	1668.85	0.192959	0.0596567	3.23449	0.00121859	0.0194912	Nr1h2	7	44199040	44203375	-1	nuclear receptor subfamily 1, group H, member 2 [Source:MGI Symbol;Acc:MGI:1352463]	0.0256886
ENSMUSG00000061983	1596.68	-0.349691	0.108126	-3.23409	0.00122031	0.0194936	Rps12	10	23661081	23663173	-1	ribosomal protein S12 [Source:MGI Symbol;Acc:MGI:98105]	0.0256886
ENSMUSG00000028007	3875.58	-0.160613	0.0496659	-3.23388	0.00122122	0.0194936	Snx7	3	117575296	117662585	-1	sorting nexin 7 [Source:MGI Symbol;Acc:MGI:1923811]	0.0256886
ENSMUSG00000098183	3.19909	4.97318	1.53795	3.23364	0.00122222	NA	Gm27010	14	61863375	61864786	-1	predicted gene, 27010 [Source:MGI Symbol;Acc:MGI:5504125]	0.0256886
ENSMUSG00000008393	2350.13	-0.311539	0.0963787	-3.23245	0.00122735	0.0195717	Carhsp1	16	8476444	8490019	-1	calcium regulated heat stable protein 1 [Source:MGI Symbol;Acc:MGI:1196368]	0.0257707
ENSMUSG00000020680	841.414	0.257159	0.0795732	3.23173	0.00123043	0.0195871	Taf15	11	83363912	83397569	1	TATA-box binding protein associated factor 15 [Source:MGI Symbol;Acc:MGI:1917689]	0.0257918
ENSMUSG00000060073	2943.27	-0.230274	0.071256	-3.23164	0.00123081	0.0195871	Psma3	12	71021395	71043121	1	proteasome subunit alpha 3 [Source:MGI Symbol;Acc:MGI:104883]	0.0257918
ENSMUSG00000062300	1108.23	-0.274086	0.0848662	-3.22962	0.00123953	0.0196554	Nectin2	7	19450569	19484408	-1	nectin cell adhesion molecule 2 [Source:MGI Symbol;Acc:MGI:97822]	0.0258836
ENSMUSG00000031059	1370.36	-0.238086	0.0737204	-3.22959	0.0012397	0.0196554	Ndufb11	X	20481565	20483858	-1	NADH:ubiquinone oxidoreductase subunit B11 [Source:MGI Symbol;Acc:MGI:1349919]	0.0258836
ENSMUSG00000043923	131.661	0.928906	0.287638	3.22943	0.00124038	0.0196554	Ccdc84	9	44321456	44329866	-1	coiled-coil domain containing 84 [Source:MGI Symbol;Acc:MGI:2685960]	0.0258836
ENSMUSG00000028837	1881.29	-0.195291	0.0604738	-3.22935	0.0012407	0.0196554	Psmb2	4	126571423	126603507	1	proteasome (prosome, macropain) subunit, beta type 2 [Source:MGI Symbol;Acc:MGI:1347045]	0.0258836
ENSMUSG00000021190	11976.1	-0.166166	0.0514572	-3.22921	0.00124134	0.0196554	Lgmn	12	102360343	102406072	-1	legumain [Source:MGI Symbol;Acc:MGI:1330838]	0.0258836
ENSMUSG00000117286	1280.23	0.288587	0.089384	3.22862	0.0012439	0.0196761	Gm1043	5	37242714	37386891	1	predicted gene 1043 [Source:MGI Symbol;Acc:MGI:2685889]	0.0259113
ENSMUSG00000029161	618.587	-0.273844	0.0848579	-3.22709	0.00125058	0.0197619	Cgref1	5	31090487	31102935	-1	cell growth regulator with EF hand domain 1 [Source:MGI Symbol;Acc:MGI:1915817]	0.0260246
ENSMUSG00000025255	355.62	-0.430437	0.1334	-3.22667	0.00125238	0.0197633	Zfhx4	3	5283586	5480917	1	zinc finger homeodomain 4 [Source:MGI Symbol;Acc:MGI:2137668]	0.0260273
ENSMUSG00000035139	355.012	0.370631	0.114871	3.22649	0.00125318	0.0197633	Secisbp2	13	51805733	51838080	1	SECIS binding protein 2 [Source:MGI Symbol;Acc:MGI:1922670]	0.0260273
ENSMUSG00000001918	1216.57	0.295313	0.0915563	3.22548	0.00125762	0.0198135	Slc1a5	7	16515265	16532199	1	solute carrier family 1 (neutral amino acid transporter), member 5 [Source:MGI Symbol;Acc:MGI:105305]	0.0260937
ENSMUSG00000028341	41.0757	1.19729	0.371348	3.22416	0.00126343	0.019885	Nr4a3	4	48045153	48086447	1	nuclear receptor subfamily 4, group A, member 3 [Source:MGI Symbol;Acc:MGI:1352457]	0.0261884
ENSMUSG00000019054	2867.59	-0.200377	0.0621708	-3.22301	0.00126849	0.0199258	Fis1	5	136982129	136995088	1	fission, mitochondrial 1 [Source:MGI Symbol;Acc:MGI:1913687]	0.0262428
ENSMUSG00000000959	991.132	0.239748	0.0743866	3.223	0.00126855	0.0199258	Oxa1l	14	54598291	54607130	1	oxidase assembly 1-like [Source:MGI Symbol;Acc:MGI:1916339]	0.0262428
ENSMUSG00000031320	4852.33	-0.16001	0.0496623	-3.22196	0.00127316	0.0199784	Rps4x	X	101228547	101233000	-1	ribosomal protein S4, X-linked [Source:MGI Symbol;Acc:MGI:98158]	0.0263125
ENSMUSG00000052419	714.098	-0.295554	0.0917547	-3.22113	0.00127686	0.0199848	2610001J05Rik	6	13867734	13871517	-1	RIKEN cDNA 2610001J05 gene [Source:MGI Symbol;Acc:MGI:1913770]	0.0263224
ENSMUSG00000036036	27.4337	1.38544	0.430146	3.22087	0.00127802	0.0199848	Zfp57	17	37312055	37321527	1	zinc finger protein 57 [Source:MGI Symbol;Acc:MGI:99204]	0.0263224
ENSMUSG00000021939	48210.8	-0.14513	0.04506	-3.22082	0.00127825	0.0199848	Ctsb	14	63359911	63383372	1	cathepsin B [Source:MGI Symbol;Acc:MGI:88561]	0.0263224
ENSMUSG00000025917	3742.77	-0.204509	0.0634977	-3.22073	0.00127865	0.0199848	Cops5	1	10094826	10108393	-1	COP9 signalosome subunit 5 [Source:MGI Symbol;Acc:MGI:1349415]	0.0263224
ENSMUSG00000028416	3288.6	-0.162664	0.0505671	-3.2168	0.00129628	0.02021	Bag1	4	40936398	40948294	-1	BCL2-associated athanogene 1 [Source:MGI Symbol;Acc:MGI:108047]	0.0266202
ENSMUSG00000024287	529.587	0.454081	0.141162	3.21674	0.00129655	0.02021	Thoc1	18	9957906	9995489	1	THO complex 1 [Source:MGI Symbol;Acc:MGI:1919668]	0.0266202
ENSMUSG00000104277	13.2559	2.6461	0.822624	3.21666	0.00129691	0.02021	Gm38299	2	32888539	32892327	-1	predicted gene, 38299 [Source:MGI Symbol;Acc:MGI:5611527]	0.0266202
ENSMUSG00000025868	1136.28	-0.23449	0.0729202	-3.21571	0.00130122	0.0202508	Higd2a	13	54738020	54738971	1	HIG1 domain family, member 2A [Source:MGI Symbol;Acc:MGI:1914294]	0.0266755
ENSMUSG00000060675	1360.29	-0.365337	0.113634	-3.21503	0.00130431	0.0202508	Plaat3	19	7534824	7565910	1	phospholipase A and acyltransferase 3 [Source:MGI Symbol;Acc:MGI:2179715]	0.0266755
ENSMUSG00000038894	2482.57	0.208565	0.0648719	3.21502	0.00130436	0.0202508	Irs2	8	11034681	11058458	-1	insulin receptor substrate 2 [Source:MGI Symbol;Acc:MGI:109334]	0.0266755
ENSMUSG00000000759	1015.06	0.265945	0.0827214	3.21495	0.00130468	0.0202508	Tubgcp3	8	12664277	12722248	-1	tubulin, gamma complex associated protein 3 [Source:MGI Symbol;Acc:MGI:2183752]	0.0266755
ENSMUSG00000006471	607.023	0.392591	0.122128	3.21457	0.00130638	0.0202572	Ndor1	2	25134833	25146034	-1	NADPH dependent diflavin oxidoreductase 1 [Source:MGI Symbol;Acc:MGI:1926047]	0.0266844
ENSMUSG00000004952	620.444	0.369723	0.115144	3.21097	0.00132288	0.0204928	Rasa4	5	136112770	136140714	1	RAS p21 protein activator 4 [Source:MGI Symbol;Acc:MGI:1858600]	0.0269951
ENSMUSG00000024381	5402.53	0.161941	0.0504619	3.20917	0.00133119	0.0205875	Bin1	18	32510283	32568790	1	bridging integrator 1 [Source:MGI Symbol;Acc:MGI:108092]	0.0271205
ENSMUSG00000030516	820.139	0.472813	0.147336	3.20908	0.0013316	0.0205875	Tjp1	7	64945913	65177529	-1	tight junction protein 1 [Source:MGI Symbol;Acc:MGI:98759]	0.0271205
ENSMUSG00000028708	1103.46	0.239066	0.0745245	3.20789	0.00133714	0.0206529	Mknk1	4	115696395	115736447	1	MAP kinase-interacting serine/threonine kinase 1 [Source:MGI Symbol;Acc:MGI:894316]	0.0272071
ENSMUSG00000032279	4253.53	-0.155263	0.0484231	-3.20639	0.00134412	0.0207277	Idh3a	9	54493618	54511945	1	isocitrate dehydrogenase 3 (NAD+) alpha [Source:MGI Symbol;Acc:MGI:1915084]	0.0273064
ENSMUSG00000027500	48622.2	-0.1517	0.0473134	-3.20628	0.00134462	0.0207277	Stmn2	3	8574420	8626666	1	stathmin-like 2 [Source:MGI Symbol;Acc:MGI:98241]	0.0273064
ENSMUSG00000029621	4731.67	-0.166882	0.05206	-3.20557	0.00134794	0.0207412	Arpc1a	5	145020640	145045571	1	actin related protein 2/3 complex, subunit 1A [Source:MGI Symbol;Acc:MGI:1928896]	0.027325
ENSMUSG00000032178	1371.78	0.253286	0.0790152	3.20553	0.00134813	0.0207412	Ilf3	9	21279167	21316657	1	interleukin enhancer binding factor 3 [Source:MGI Symbol;Acc:MGI:1339973]	0.027325
ENSMUSG00000038080	194.28	0.456822	0.142531	3.20508	0.00135027	0.0207538	Kdm1b	13	47196975	47238755	1	lysine (K)-specific demethylase 1B [Source:MGI Symbol;Acc:MGI:2145261]	0.027342
ENSMUSG00000031200	47.8057	0.982032	0.30692	3.19964	0.00137601	0.0211288	Mtcp1	X	74454050	74460194	-1	mature T cell proliferation 1 [Source:MGI Symbol;Acc:MGI:102699]	0.0278365
ENSMUSG00000034799	5326.43	0.203432	0.0635887	3.19918	0.00137819	0.0211417	Unc13a	8	72077061	72124401	-1	unc-13 homolog A [Source:MGI Symbol;Acc:MGI:3051532]	0.027851
ENSMUSG00000107200	6.37639	3.48425	1.08919	3.19893	0.00137938	NA	Gm43039	5	92105859	92106821	-1	predicted gene 43039 [Source:MGI Symbol;Acc:MGI:5663176]	0.027851
ENSMUSG00000024136	20.8135	1.78016	0.556627	3.19812	0.00138328	0.0211968	Dnase1l2	17	24659055	24662079	-1	deoxyribonuclease 1-like 2 [Source:MGI Symbol;Acc:MGI:1913955]	0.0279009
ENSMUSG00000036430	948.729	-0.257713	0.080592	-3.19775	0.00138504	0.0211968	Tbcc	17	47201610	47202773	1	tubulin-specific chaperone C [Source:MGI Symbol;Acc:MGI:1919976]	0.0279009
ENSMUSG00000037020	167.461	0.643099	0.20112	3.19759	0.00138583	0.0211968	Wdr62	7	29939563	29979844	-1	WD repeat domain 62 [Source:MGI Symbol;Acc:MGI:1923696]	0.0279009
ENSMUSG00000009292	1175.2	0.374524	0.117141	3.19722	0.00138759	0.0212032	Trpm2	10	77743556	77806397	-1	transient receptor potential cation channel, subfamily M, member 2 [Source:MGI Symbol;Acc:MGI:1351901]	0.0279097
ENSMUSG00000032968	157.798	0.560614	0.175391	3.19636	0.00139172	0.0212457	Inha	1	75483721	75487010	1	inhibin alpha [Source:MGI Symbol;Acc:MGI:96569]	0.027966
ENSMUSG00000025369	3641.58	0.185126	0.0579489	3.19464	0.00140005	0.0213521	Smarcc2	10	128295117	128326351	1	SWI/SNF related, matrix associated, actin dependent regulator of chromatin, subfamily c, member 2 [Source:MGI Symbol;Acc:MGI:1915344]	0.0281065
ENSMUSG00000064043	253.669	0.441184	0.138327	3.18943	0.00142554	0.0217198	Trerf1	17	47451801	47672883	1	transcriptional regulating factor 1 [Source:MGI Symbol;Acc:MGI:2442086]	0.028591
ENSMUSG00000036306	1077.18	0.505065	0.158393	3.18867	0.00142928	0.0217557	Lzts1	8	69585321	69636877	-1	leucine zipper, putative tumor suppressor 1 [Source:MGI Symbol;Acc:MGI:2684762]	0.0286387
ENSMUSG00000035713	3091.65	0.20802	0.0652476	3.18817	0.00143177	0.0217726	Usp35	7	96958587	96981227	-1	ubiquitin specific peptidase 35 [Source:MGI Symbol;Acc:MGI:2685339]	0.0286613
ENSMUSG00000029162	807.209	-0.282885	0.0887476	-3.18752	0.00143497	0.0218002	Khk	5	31078775	31088592	1	ketohexokinase [Source:MGI Symbol;Acc:MGI:1096353]	0.0286981
ENSMUSG00000018965	53149.8	-0.156904	0.0492429	-3.18633	0.0014409	0.021861	Ywhah	5	33176160	33185310	1	tyrosine 3-monooxygenase/tryptophan 5-monooxygenase activation protein, eta polypeptide [Source:MGI Symbol;Acc:MGI:109194]	0.0287789
ENSMUSG00000024560	699.891	0.427424	0.13415	3.18616	0.00144175	0.021861	Cxxc1	18	74349195	74354567	1	CXXC finger 1 (PHD domain) [Source:MGI Symbol;Acc:MGI:1921572]	0.0287789
ENSMUSG00000070493	6543.75	-0.21547	0.0676903	-3.18317	0.0014567	0.0220464	Chchd2	5	129909997	129916311	-1	coiled-coil-helix-coiled-coil-helix domain containing 2 [Source:MGI Symbol;Acc:MGI:1261428]	0.0290239
ENSMUSG00000021891	308.058	0.398515	0.125195	3.18316	0.00145678	0.0220464	Mettl6	14	31195535	31216997	-1	methyltransferase like 6 [Source:MGI Symbol;Acc:MGI:1914261]	0.0290239
ENSMUSG00000030086	832.81	-0.244217	0.0767398	-3.18241	0.00146055	0.0220822	Chchd6	6	89360128	89572634	-1	coiled-coil-helix-coiled-coil-helix domain containing 6 [Source:MGI Symbol;Acc:MGI:1913348]	0.0290714
ENSMUSG00000024422	776.633	0.35226	0.110701	3.18208	0.00146221	0.0220862	Dhx16	17	36190711	36203562	1	DEAH (Asp-Glu-Ala-His) box polypeptide 16 [Source:MGI Symbol;Acc:MGI:1916442]	0.0290771
ENSMUSG00000071103	48.0628	0.903049	0.283997	3.17978	0.00147385	0.0222405	1700029J07Rik	8	46406643	46428477	-1	RIKEN cDNA 1700029J07 gene [Source:MGI Symbol;Acc:MGI:1916729]	0.0292807
ENSMUSG00000020163	1617.58	-0.312696	0.0984415	-3.17646	0.00149084	0.0224754	Uqcr11	10	80238831	80242664	-1	ubiquinol-cytochrome c reductase, complex III subunit XI [Source:MGI Symbol;Acc:MGI:1913844]	0.0295903
ENSMUSG00000020674	1270.4	0.954804	0.300817	3.17404	0.00150334	0.0226421	Pxdn	12	29987607	30067657	1	peroxidasin [Source:MGI Symbol;Acc:MGI:1916925]	0.0298103
ENSMUSG00000021996	2763.83	-0.245346	0.0773049	-3.17374	0.00150487	0.0226436	Esd	14	74969737	74988205	1	esterase D/formylglutathione hydrolase [Source:MGI Symbol;Acc:MGI:95421]	0.0298126
ENSMUSG00000042660	356.472	-0.346735	0.109341	-3.17114	0.00151841	0.0228255	Wdr55	18	36893273	36896863	1	WD repeat domain 55 [Source:MGI Symbol;Acc:MGI:1915186]	0.0300525
ENSMUSG00000035297	2242.43	-0.203229	0.0641199	-3.16952	0.0015269	0.0229183	Cops4	5	100666175	100695669	1	COP9 signalosome subunit 4 [Source:MGI Symbol;Acc:MGI:1349414]	0.030176
ENSMUSG00000036372	386.815	-0.327245	0.103253	-3.16937	0.00152771	0.0229183	Tmem258	19	10181378	10185188	1	transmembrane protein 258 [Source:MGI Symbol;Acc:MGI:1916288]	0.030176
ENSMUSG00000020752	622.727	0.342967	0.108221	3.16913	0.00152895	0.0229183	Recql5	11	115783421	115824303	-1	RecQ protein-like 5 [Source:MGI Symbol;Acc:MGI:2156841]	0.030176
ENSMUSG00000037071	24254.4	-0.23027	0.0726674	-3.16882	0.0015306	0.0229211	Scd1	19	44382894	44396318	-1	stearoyl-Coenzyme A desaturase 1 [Source:MGI Symbol;Acc:MGI:98239]	0.0301801
ENSMUSG00000029095	1861.14	0.281562	0.0888984	3.16723	0.00153899	0.0230248	Ablim2	5	35915224	36042317	1	actin-binding LIM protein 2 [Source:MGI Symbol;Acc:MGI:2385758]	0.0303172
ENSMUSG00000042207	808.853	0.263332	0.0831762	3.16596	0.00154574	0.0231038	Kdm5b	1	134487909	134563023	1	lysine (K)-specific demethylase 5B [Source:MGI Symbol;Acc:MGI:1922855]	0.0304216
ENSMUSG00000022452	2624.95	-0.19275	0.0608903	-3.16553	0.00154799	0.0231155	Smdt1	15	82223160	82233292	1	single-pass membrane protein with aspartate rich tail 1 [Source:MGI Symbol;Acc:MGI:1916279]	0.0304375
ENSMUSG00000029430	5908.65	-0.176073	0.0556299	-3.16508	0.00155042	0.0231299	Ran	5	129097133	129101387	1	RAN, member RAS oncogene family [Source:MGI Symbol;Acc:MGI:1333112]	0.0304569
ENSMUSG00000066191	266.635	0.600521	0.189789	3.16415	0.00155535	0.0231815	Anks6	4	47015669	47057427	-1	ankyrin repeat and sterile alpha motif domain containing 6 [Source:MGI Symbol;Acc:MGI:1922941]	0.0305252
ENSMUSG00000028476	183.513	0.582862	0.184249	3.16344	0.00155918	0.0232165	Reck	4	43875530	43944806	1	reversion-inducing-cysteine-rich protein with kazal motifs [Source:MGI Symbol;Acc:MGI:1855698]	0.0305717
ENSMUSG00000003119	835.452	0.250353	0.0792049	3.16082	0.00157325	0.0233876	Cdk12	11	98093885	98169330	1	cyclin-dependent kinase 12 [Source:MGI Symbol;Acc:MGI:1098802]	0.0307979
ENSMUSG00000026399	9221.38	-0.188499	0.0596373	-3.16075	0.00157364	0.0233876	Cd55	1	130366764	130390481	-1	CD55 molecule, decay accelerating factor for complement [Source:MGI Symbol;Acc:MGI:104850]	0.0307979
ENSMUSG00000041959	9295.3	-0.233919	0.0740592	-3.15854	0.00158559	0.0235233	S100a10	3	93462387	93471950	1	S100 calcium binding protein A10 (calpactin) [Source:MGI Symbol;Acc:MGI:1339468]	0.0309779
ENSMUSG00000006699	8431.85	-0.144579	0.0457763	-3.15838	0.00158648	0.0235233	Cdc42	4	137047007	137085031	-1	cell division cycle 42 [Source:MGI Symbol;Acc:MGI:106211]	0.0309779
ENSMUSG00000022797	4255.92	-0.297879	0.0943182	-3.15824	0.00158725	0.0235233	Tfrc	16	32427738	32451612	1	transferrin receptor [Source:MGI Symbol;Acc:MGI:98822]	0.0309779
ENSMUSG00000016933	1488.03	0.310381	0.0983226	3.15676	0.00159532	0.0236206	Plcg1	2	160573220	160617680	1	phospholipase C, gamma 1 [Source:MGI Symbol;Acc:MGI:97615]	0.0311065
ENSMUSG00000022212	17576.9	0.15239	0.0482959	3.15533	0.00160315	0.0237143	Cpne6	14	55747902	55754888	1	copine VI [Source:MGI Symbol;Acc:MGI:1334445]	0.0312303
ENSMUSG00000001052	1739.22	0.264612	0.083874	3.15487	0.00160567	0.0237293	Sec24b	3	129776408	129855202	-1	Sec24 related gene family, member B (S. cerevisiae) [Source:MGI Symbol;Acc:MGI:2139764]	0.0312504
ENSMUSG00000032487	53.461	0.992273	0.314735	3.15273	0.00161752	0.023882	Ptgs2	1	149975782	149983978	1	prostaglandin-endoperoxide synthase 2 [Source:MGI Symbol;Acc:MGI:97798]	0.031452
ENSMUSG00000042500	152.68	0.661555	0.209892	3.15188	0.00162225	0.0239294	Ago4	4	126383334	126427265	-1	argonaute RISC catalytic subunit 4 [Source:MGI Symbol;Acc:MGI:1924100]	0.0315148
ENSMUSG00000033880	1986.99	-0.249728	0.0792812	-3.1499	0.00163328	0.0240695	Lgals3bp	11	118283577	118292918	-1	lectin, galactoside-binding, soluble, 3 binding protein [Source:MGI Symbol;Acc:MGI:99554]	0.0316999
ENSMUSG00000015776	872.967	-0.301063	0.0955976	-3.14928	0.00163675	0.0240981	Med22	2	26795274	26800689	-1	mediator complex subunit 22 [Source:MGI Symbol;Acc:MGI:98446]	0.031738
ENSMUSG00000006241	222.731	0.483508	0.153648	3.14684	0.00165043	0.0242584	Ccdc159	9	21838767	21847168	1	coiled-coil domain containing 159 [Source:MGI Symbol;Acc:MGI:1914369]	0.03195
ENSMUSG00000038453	1804.02	0.31238	0.0992693	3.14679	0.00165073	0.0242584	Srcin1	11	97400166	97467012	-1	SRC kinase signaling inhibitor 1 [Source:MGI Symbol;Acc:MGI:1933179]	0.03195
ENSMUSG00000035595	102.82	0.613571	0.195018	3.14623	0.00165392	0.0242828	Fam174c	10	80008778	80010980	1	family with sequence similarity 174, member C [Source:MGI Symbol;Acc:MGI:1917020]	0.0319825
ENSMUSG00000025572	1347.9	0.356569	0.113349	3.14577	0.00165652	0.0242982	Tmc6	11	117656814	117673024	-1	transmembrane channel-like gene family 6 [Source:MGI Symbol;Acc:MGI:1098686]	0.0320032
ENSMUSG00000034730	2278.94	0.268054	0.085222	3.14537	0.00165879	0.0243089	Adgrb1	15	74388044	74461314	1	adhesion G protein-coupled receptor B1 [Source:MGI Symbol;Acc:MGI:1933736]	0.0320177
ENSMUSG00000111837	322.433	2.25913	0.71848	3.14431	0.00166477	0.0243738	Gm47135	9	122511807	122512706	1	predicted gene, 47135 [Source:MGI Symbol;Acc:MGI:6095892]	0.0321037
ENSMUSG00000063316	1124.2	-0.30756	0.0978315	-3.14378	0.00166783	0.0243959	Rpl27	11	101333124	101336355	1	ribosomal protein L27 [Source:MGI Symbol;Acc:MGI:98036]	0.0321332
ENSMUSG00000019173	3101.28	-0.181227	0.0576672	-3.14263	0.00167436	0.0244557	Rab5c	11	100605835	100629041	-1	RAB5C, member RAS oncogene family [Source:MGI Symbol;Acc:MGI:105306]	0.0322129
ENSMUSG00000024597	4124.74	-0.200238	0.063719	-3.14252	0.00167503	0.0244557	Slc12a2	18	58011750	58079893	1	solute carrier family 12, member 2 [Source:MGI Symbol;Acc:MGI:101924]	0.0322129
ENSMUSG00000021360	10235.1	-0.176161	0.0560706	-3.14178	0.00167926	0.0244948	Gcnt2	13	41013230	41114368	1	glucosaminyl (N-acetyl) transferase 2, I-branching enzyme [Source:MGI Symbol;Acc:MGI:1100870]	0.0322648
ENSMUSG00000024454	1942.03	0.194999	0.0620812	3.14103	0.00168352	0.0245342	Hdac3	18	38068897	38088069	-1	histone deacetylase 3 [Source:MGI Symbol;Acc:MGI:1343091]	0.0323171
ENSMUSG00000110185	1411.57	-0.297603	0.0947673	-3.14036	0.00168742	0.0245682	Igip	18	36431732	36434570	1	IgA inducing protein [Source:MGI Symbol;Acc:MGI:1924271]	0.0323624
ENSMUSG00000034949	1216.49	0.324521	0.103353	3.13993	0.00168987	0.0245812	Zfr2	10	81068989	81087957	1	zinc finger RNA binding protein 2 [Source:MGI Symbol;Acc:MGI:2143792]	0.0323799
ENSMUSG00000090264	17.1871	2.20631	0.702782	3.13939	0.00169302	0.0246043	Eif4ebp3	18	36797113	36798970	1	eukaryotic translation initiation factor 4E binding protein 3 [Source:MGI Symbol;Acc:MGI:1270847]	0.0324108
ENSMUSG00000020646	1459.25	-0.283251	0.0902579	-3.13824	0.00169966	0.0246781	Mboat2	12	24880878	25014396	1	membrane bound O-acyltransferase domain containing 2 [Source:MGI Symbol;Acc:MGI:1914466]	0.0325084
ENSMUSG00000053483	334.113	0.370304	0.118017	3.13772	0.00170265	0.0246987	Usp21	1	171109519	171115564	-1	ubiquitin specific peptidase 21 [Source:MGI Symbol;Acc:MGI:1353665]	0.032536
ENSMUSG00000012296	281.511	0.655076	0.208816	3.13709	0.00170633	0.0247292	Tjap1	17	46568777	46593952	-1	tight junction associated protein 1 [Source:MGI Symbol;Acc:MGI:1921344]	0.0325767
ENSMUSG00000027944	1399.56	-0.222318	0.0708791	-3.13658	0.0017093	0.0247495	Hax1	3	89902753	89906087	-1	HCLS1 associated X-1 [Source:MGI Symbol;Acc:MGI:1346319]	0.0326038
ENSMUSG00000031574	85.2963	-0.807272	0.257564	-3.13426	0.00172288	0.0249231	Star	8	26296583	26306010	1	steroidogenic acute regulatory protein [Source:MGI Symbol;Acc:MGI:102760]	0.032833
ENSMUSG00000063015	8717.58	-0.135432	0.0432299	-3.13283	0.00173131	0.0250222	Ccni	5	93329792	93354354	-1	cyclin I [Source:MGI Symbol;Acc:MGI:1341077]	0.0329639
ENSMUSG00000028601	95.8736	0.644016	0.205606	3.13228	0.00173455	0.025046	Echdc2	4	108022634	108036505	1	enoyl Coenzyme A hydratase domain containing 2 [Source:MGI Symbol;Acc:MGI:1289238]	0.0329957
ENSMUSG00000048550	461.175	-0.320105	0.102217	-3.13161	0.00173848	0.0250797	Thnsl1	2	21210535	21219820	1	threonine synthase-like 1 (bacterial) [Source:MGI Symbol;Acc:MGI:2139347]	0.0330405
ENSMUSG00000106717	3.81904	5.24715	1.67592	3.13091	0.00174268	NA	Gm42798	5	31367688	31371659	-1	predicted gene 42798 [Source:MGI Symbol;Acc:MGI:5662935]	0.0330906
ENSMUSG00000104344	22.8193	1.76637	0.564232	3.13057	0.00174466	0.0251457	Gm38077	9	104941976	104945220	1	predicted gene, 38077 [Source:MGI Symbol;Acc:MGI:5611305]	0.0330981
ENSMUSG00000112148	74.1737	0.89981	0.287472	3.13008	0.00174757	0.0251647	Lilrb4a	10	51367052	51372707	1	leukocyte immunoglobulin-like receptor, subfamily B, member 4A [Source:MGI Symbol;Acc:MGI:102701]	0.0331236
ENSMUSG00000024939	3086.44	-0.184477	0.0589479	-3.1295	0.00175105	0.0251918	Fam89b	19	5778115	5779681	-1	family with sequence similarity 89, member B [Source:MGI Symbol;Acc:MGI:106595]	0.0331596
ENSMUSG00000007458	2730.07	-0.194127	0.0620486	-3.12863	0.00175623	0.0252432	M6pr	6	122285679	122294639	1	mannose-6-phosphate receptor, cation dependent [Source:MGI Symbol;Acc:MGI:96904]	0.0332278
ENSMUSG00000086920	3.06375	4.91077	1.57042	3.12704	0.00176574	NA	Gm12207	11	52124551	52127446	1	predicted gene 12207 [Source:MGI Symbol;Acc:MGI:3702399]	0.0333777
ENSMUSG00000042404	949.682	0.316749	0.101341	3.12557	0.00177461	0.0254841	Dennd4b	3	90172492	90187976	1	DENN/MADD domain containing 4B [Source:MGI Symbol;Acc:MGI:2446201]	0.0335153
ENSMUSG00000039220	1229.91	0.287031	0.0918823	3.1239	0.00178474	0.0256062	Ppp1r10	17	36227326	36243175	1	protein phosphatase 1, regulatory subunit 10 [Source:MGI Symbol;Acc:MGI:1289273]	0.0336763
ENSMUSG00000029616	1466	-0.208657	0.066806	-3.12332	0.00178823	0.0256228	Erp29	5	121566653	121590569	-1	endoplasmic reticulum protein 29 [Source:MGI Symbol;Acc:MGI:1914647]	0.0336991
ENSMUSG00000026701	2305.34	-0.184565	0.0590954	-3.12317	0.00178915	0.0256228	Prdx6	1	161067682	161078789	-1	peroxiredoxin 6 [Source:MGI Symbol;Acc:MGI:894320]	0.0336991
ENSMUSG00000018770	5836.17	-0.1692	0.0541943	-3.1221	0.00179566	0.0256761	Atp5g3	2	73738791	73741670	-1	ATP synthase, H+ transporting, mitochondrial F0 complex, subunit C3 (subunit 9) [Source:MGI Symbol;Acc:MGI:2442035]	0.0337703
ENSMUSG00000109324	1400.32	-0.200915	0.0643542	-3.12202	0.00179614	0.0256761	Prmt1	7	44625413	44635992	-1	protein arginine N-methyltransferase 1 [Source:MGI Symbol;Acc:MGI:107846]	0.0337703
ENSMUSG00000026097	227.685	-0.436586	0.139866	-3.12147	0.00179953	0.0257013	Ormdl1	1	53336254	53349468	1	ORM1-like 1 (S. cerevisiae) [Source:MGI Symbol;Acc:MGI:2181669]	0.0338038
ENSMUSG00000024235	26.3007	1.39083	0.445633	3.12101	0.00180233	0.025718	Map3k8	18	4331327	4353015	-1	mitogen-activated protein kinase kinase kinase 8 [Source:MGI Symbol;Acc:MGI:1346878]	0.0338263
ENSMUSG00000042185	618.019	0.356445	0.114276	3.11916	0.00181367	0.0258563	Nfrkb	9	31297488	31332629	1	nuclear factor related to kappa B binding protein [Source:MGI Symbol;Acc:MGI:2442410]	0.0340088
ENSMUSG00000027195	2375.45	-0.175083	0.0561453	-3.1184	0.00181837	0.0258998	Hsd17b12	2	93863034	93988309	-1	hydroxysteroid (17-beta) dehydrogenase 12 [Source:MGI Symbol;Acc:MGI:1926967]	0.0340664
ENSMUSG00000039680	822.035	-0.261848	0.0840238	-3.11636	0.00183098	0.0260437	Mrps6	16	91855158	91909115	1	mitochondrial ribosomal protein S6 [Source:MGI Symbol;Acc:MGI:2153111]	0.0342567
ENSMUSG00000030614	1268.35	-0.205685	0.0660043	-3.11623	0.00183178	0.0260437	Tmem126b	7	90116646	90125209	-1	transmembrane protein 126B [Source:MGI Symbol;Acc:MGI:1915722]	0.0342567
ENSMUSG00000036850	1037.15	-0.363462	0.116749	-3.1132	0.0018507	0.0262659	Mrpl41	2	24864129	24865110	-1	mitochondrial ribosomal protein L41 [Source:MGI Symbol;Acc:MGI:1333816]	0.0345501
ENSMUSG00000004285	2452.58	-0.191241	0.0614292	-3.11319	0.00185075	0.0262659	Atp6v1f	6	29467717	29470511	1	ATPase, H+ transporting, lysosomal V1 subunit F [Source:MGI Symbol;Acc:MGI:1913394]	0.0345501
ENSMUSG00000069744	2732.33	-0.198967	0.0639341	-3.11206	0.00185787	0.0263432	Psmb3	11	97594225	97604326	1	proteasome (prosome, macropain) subunit, beta type 3 [Source:MGI Symbol;Acc:MGI:1347014]	0.0346522
ENSMUSG00000021013	259.978	0.581299	0.186819	3.11156	0.00186099	0.0263638	Ttc8	12	98886833	98949497	1	tetratricopeptide repeat domain 8 [Source:MGI Symbol;Acc:MGI:1923510]	0.0346797
ENSMUSG00000030814	641.423	-0.29114	0.0936082	-3.1102	0.00186959	0.0264618	Bcl7c	7	127260628	127308105	-1	B cell CLL/lymphoma 7C [Source:MGI Symbol;Acc:MGI:1332237]	0.0348092
ENSMUSG00000073436	1014.35	0.306019	0.0984476	3.10845	0.00188073	0.0265944	Eme2	17	25107460	25114061	-1	essential meiotic structure-specific endonuclease subunit 2 [Source:MGI Symbol;Acc:MGI:1919889]	0.0349849
ENSMUSG00000023051	498.289	0.329645	0.106057	3.10819	0.00188236	0.0265944	Tarbp2	15	102426627	102432111	1	TARBP2, RISC loading complex RNA binding subunit [Source:MGI Symbol;Acc:MGI:103027]	0.0349849
ENSMUSG00000040888	255.677	-0.456376	0.146843	-3.10793	0.00188403	0.0265944	Gfer	17	24912161	24915130	-1	growth factor, augmenter of liver regeneration [Source:MGI Symbol;Acc:MGI:107757]	0.0349851
ENSMUSG00000045838	304.706	0.45339	0.145964	3.10618	0.00189522	0.0267284	Ccdc9b	2	118584639	118593142	-1	coiled-coil domain containing 9B [Source:MGI Symbol;Acc:MGI:2685199]	0.0351618
ENSMUSG00000058258	5644.24	-0.197644	0.0636469	-3.10532	0.00190073	0.026782	Idi1	13	8935537	8942487	1	isopentenyl-diphosphate delta isomerase [Source:MGI Symbol;Acc:MGI:2442264]	0.0352329
ENSMUSG00000003380	5860.59	-0.170989	0.0550754	-3.10464	0.00190514	0.0268202	Rabac1	7	24669177	24672179	-1	Rab acceptor 1 (prenylated) [Source:MGI Symbol;Acc:MGI:1201692]	0.0352836
ENSMUSG00000029094	365.618	0.39468	0.127182	3.10327	0.00191395	0.0269202	Afap1	5	36050663	36161267	1	actin filament associated protein 1 [Source:MGI Symbol;Acc:MGI:1917542]	0.0354157
ENSMUSG00000017778	2816.29	-0.300621	0.0968837	-3.10291	0.00191627	0.0269288	Cox7c	13	86192935	86195023	-1	cytochrome c oxidase subunit 7C [Source:MGI Symbol;Acc:MGI:103226]	0.0354275
ENSMUSG00000025137	2584.69	0.334829	0.107993	3.10047	0.00193211	0.0271272	Pcyt2	11	120500913	120508762	-1	phosphate cytidylyltransferase 2, ethanolamine [Source:MGI Symbol;Acc:MGI:1915921]	0.035689
ENSMUSG00000045795	377.428	0.335643	0.108294	3.09936	0.0019394	0.0272052	Whamm	7	81221014	81246584	1	WAS protein homolog associated with actin, golgi membranes and microtubules [Source:MGI Symbol;Acc:MGI:2142282]	0.0357922
ENSMUSG00000029454	675.94	0.407828	0.131658	3.09763	0.00195074	0.0273391	Mapkapk5	5	121663101	121683968	-1	MAP kinase-activated protein kinase 5 [Source:MGI Symbol;Acc:MGI:1333110]	0.0359698
ENSMUSG00000043831	472.565	-0.350197	0.113069	-3.09719	0.00195362	0.0273391	Lysmd4	7	66872292	66957078	1	LysM, putative peptidoglycan-binding, domain containing 4 [Source:MGI Symbol;Acc:MGI:1922349]	0.0359703
ENSMUSG00000100455	46.9513	0.918125	0.29646	3.09696	0.00195514	0.0273391	Gm29170	1	143653380	143657045	1	predicted gene 29170 [Source:MGI Symbol;Acc:MGI:5579876]	0.0359703
ENSMUSG00000093803	582.34	0.316599	0.102233	3.09685	0.00195589	0.0273391	Ppp2r3d	9	124195827	124204759	1	protein phosphatase 2 (formerly 2A), regulatory subunit B'', delta [Source:MGI Symbol;Acc:MGI:1335093]	0.0359703
ENSMUSG00000110234	42.0869	1.06665	0.344486	3.09634	0.00195926	0.0273496	Gm45799	7	105289759	105333646	1	predicted gene 45799 [Source:MGI Symbol;Acc:MGI:5804914]	0.0359852
ENSMUSG00000030286	2062.62	-0.17655	0.0570214	-3.09621	0.00196012	0.0273496	Emc3	6	113491835	113508613	-1	ER membrane protein complex subunit 3 [Source:MGI Symbol;Acc:MGI:1913337]	0.0359852
ENSMUSG00000028822	3743.11	-0.227278	0.0734572	-3.09402	0.00197466	0.027519	Tmem50a	4	134625160	134642335	-1	transmembrane protein 50A [Source:MGI Symbol;Acc:MGI:1919067]	0.036209
ENSMUSG00000059796	6089.02	-0.1358	0.0438934	-3.09385	0.00197576	0.027519	Eif4a1	11	69557762	69563249	-1	eukaryotic translation initiation factor 4A1 [Source:MGI Symbol;Acc:MGI:95303]	0.036209
ENSMUSG00000029283	117.411	0.582924	0.188443	3.09336	0.00197901	0.0275399	Cdc7	5	107112188	107132298	1	cell division cycle 7 (S. cerevisiae) [Source:MGI Symbol;Acc:MGI:1309511]	0.0362184
ENSMUSG00000110218	6.62884	3.03198	0.980191	3.09326	0.00197971	NA	Tincr	17	56858414	56861387	-1	TINCR ubiquitin domain containing [Source:MGI Symbol;Acc:MGI:5012404]	0.0362184
ENSMUSG00000105556	11.6542	1.96714	0.636034	3.09282	0.00198267	NA	Gm43080	3	36023533	36026175	-1	predicted gene 43080 [Source:MGI Symbol;Acc:MGI:5663217]	0.0362409
ENSMUSG00000043940	5548.33	-0.257612	0.0833283	-3.09154	0.00199123	0.0276855	Wdfy3	5	101980822	102217787	-1	WD repeat and FYVE domain containing 3 [Source:MGI Symbol;Acc:MGI:1096875]	0.0363659
ENSMUSG00000024330	169.909	0.948773	0.306948	3.09099	0.00199487	0.0276875	Col11a2	17	34258411	34285659	1	collagen, type XI, alpha 2 [Source:MGI Symbol;Acc:MGI:88447]	0.0363697
ENSMUSG00000024338	345.807	-0.657141	0.212599	-3.09099	0.0019949	0.0276875	Psmb8	17	34416695	34420428	1	proteasome (prosome, macropain) subunit, beta type 8 (large multifunctional peptidase 7) [Source:MGI Symbol;Acc:MGI:1346527]	0.0363697
ENSMUSG00000106944	13.9741	2.10088	0.680183	3.0887	0.00201033	0.0278771	Gm43843	6	18429658	18431244	-1	predicted gene 43843 [Source:MGI Symbol;Acc:MGI:5663980]	0.0366193
ENSMUSG00000014606	2118.3	-0.177483	0.0574983	-3.08675	0.00202355	0.0280359	Slc25a11	11	70535022	70538305	-1	solute carrier family 25 (mitochondrial carrier oxoglutarate carrier), member 11 [Source:MGI Symbol;Acc:MGI:1915113]	0.0368284
ENSMUSG00000072653	92.3781	0.73416	0.237967	3.08514	0.00203456	0.0281635	Zfp783	6	47920105	47932847	1	zinc finger protein 783 [Source:MGI Symbol;Acc:MGI:3040704]	0.0369966
ENSMUSG00000004896	304.968	0.442213	0.143422	3.0833	0.0020472	0.0283135	Rrnad1	3	87829908	87838024	-1	ribosomal RNA adenine dimethylase domain containing 1 [Source:MGI Symbol;Acc:MGI:2387197]	0.0371943
ENSMUSG00000030400	606.196	0.328142	0.106447	3.08268	0.00205147	0.0283478	Ercc2	7	19115935	19129619	1	excision repair cross-complementing rodent repair deficiency, complementation group 2 [Source:MGI Symbol;Acc:MGI:95413]	0.0372398
ENSMUSG00000068749	2985.37	-0.248589	0.0806686	-3.08161	0.00205887	0.028425	Psma5	3	108164242	108187290	1	proteasome subunit alpha 5 [Source:MGI Symbol;Acc:MGI:1347009]	0.0373418
ENSMUSG00000034343	1260.6	-0.213324	0.0692386	-3.08099	0.00206313	0.0284589	Ube2f	1	91178026	91218059	1	ubiquitin-conjugating enzyme E2F (putative) [Source:MGI Symbol;Acc:MGI:1915171]	0.0373869
ENSMUSG00000039738	209.798	0.555838	0.180483	3.07973	0.00207187	0.0285544	Slx4	16	3796969	3821634	-1	SLX4 structure-specific endonuclease subunit homolog (S. cerevisiae) [Source:MGI Symbol;Acc:MGI:106299]	0.0375129
ENSMUSG00000021156	1992.67	0.380918	0.123704	3.07928	0.00207503	0.0285584	Zmynd11	13	9734869	9815366	-1	zinc finger, MYND domain containing 11 [Source:MGI Symbol;Acc:MGI:1913755]	0.0375193
ENSMUSG00000058979	385.783	0.365962	0.118851	3.07917	0.00207579	0.0285584	Hdhd5	6	120486455	120508280	-1	haloacid dehalogenase like hydrolase domain containing 5 [Source:MGI Symbol;Acc:MGI:2136976]	0.0375193
ENSMUSG00000029380	13.4352	1.97847	0.642622	3.07875	0.0020787	0.0285672	Cxcl1	5	91039100	91040974	1	chemokine (C-X-C motif) ligand 1 [Source:MGI Symbol;Acc:MGI:108068]	0.0375321
ENSMUSG00000078747	30.74	1.22932	0.399318	3.07856	0.00208006	0.0285672	Gm20878	4	41941572	41943124	1	predicted gene, 20878 [Source:MGI Symbol;Acc:MGI:5434234]	0.0375321
ENSMUSG00000037697	2588.74	0.213693	0.069427	3.07796	0.00208423	0.0285996	Ddhd1	14	45825924	45895600	-1	DDHD domain containing 1 [Source:MGI Symbol;Acc:MGI:2150302]	0.0375751
ENSMUSG00000027860	277.292	0.389392	0.126522	3.07765	0.0020864	0.0286044	Vangl1	3	102060899	102112009	-1	VANGL planar cell polarity 1 [Source:MGI Symbol;Acc:MGI:2159344]	0.037582
ENSMUSG00000003184	605.626	0.533376	0.173431	3.07544	0.00210194	0.0287924	Irf3	7	44647072	44652272	1	interferon regulatory factor 3 [Source:MGI Symbol;Acc:MGI:1859179]	0.0378296
ENSMUSG00000085311	5.78029	3.96074	1.28913	3.07243	0.00212327	NA	Gm15445	1	135080701	135081544	1	predicted gene 15445 [Source:MGI Symbol;Acc:MGI:3707341]	0.0381705
ENSMUSG00000036299	2371.61	-0.2033	0.0661731	-3.07225	0.00212451	0.0290763	BC031181	18	75138939	75143223	1	cDNA sequence BC031181 [Source:MGI Symbol;Acc:MGI:3039614]	0.0381705
ENSMUSG00000047604	176.767	0.550116	0.179272	3.06861	0.00215056	0.0293842	Frat2	19	41834411	41836571	-1	frequently rearranged in advanced T cell lymphomas 2 [Source:MGI Symbol;Acc:MGI:2673967]	0.0385771
ENSMUSG00000042724	2007.3	0.202718	0.0660684	3.06831	0.00215273	0.0293842	Map3k9	12	81767784	81827949	-1	mitogen-activated protein kinase kinase kinase 9 [Source:MGI Symbol;Acc:MGI:2449952]	0.0385771
ENSMUSG00000036815	4136.28	-0.201499	0.0656731	-3.06821	0.00215346	0.0293842	Dpp10	1	123249200	124773776	-1	dipeptidylpeptidase 10 [Source:MGI Symbol;Acc:MGI:2442409]	0.0385771
ENSMUSG00000102555	31.318	1.88363	0.613946	3.06807	0.00215448	0.0293842	6430511E19Rik	7	92289157	92292991	1	RIKEN cDNA 6430511E19 gene [Source:MGI Symbol;Acc:MGI:2443259]	0.0385771
ENSMUSG00000063972	215.578	0.576606	0.18797	3.06755	0.00215825	0.0294101	Nr6a1	2	38613382	38817700	-1	nuclear receptor subfamily 6, group A, member 1 [Source:MGI Symbol;Acc:MGI:1352459]	0.0386117
ENSMUSG00000014226	3182.59	-0.202513	0.0660415	-3.06646	0.00216613	0.0294689	Cacybp	1	160029937	160040445	-1	calcyclin binding protein [Source:MGI Symbol;Acc:MGI:1270839]	0.0386926
ENSMUSG00000071646	837.701	0.322218	0.10509	3.06611	0.00216861	0.0294689	Mta2	19	8919239	8929667	1	metastasis-associated gene family, member 2 [Source:MGI Symbol;Acc:MGI:1346340]	0.0386926
ENSMUSG00000020108	2468.53	-0.223902	0.073025	-3.0661	0.00216868	0.0294689	Ddit4	10	59785491	59787656	-1	DNA-damage-inducible transcript 4 [Source:MGI Symbol;Acc:MGI:1921997]	0.0386926
ENSMUSG00000015143	1492.32	0.260141	0.0848563	3.06566	0.0021719	0.0294689	Actn1	12	80214321	80307145	-1	actinin, alpha 1 [Source:MGI Symbol;Acc:MGI:2137706]	0.0386926
ENSMUSG00000027130	3384.43	0.186935	0.060979	3.06556	0.0021726	0.0294689	Slc12a6	2	112096170	112193508	1	solute carrier family 12, member 6 [Source:MGI Symbol;Acc:MGI:2135960]	0.0386926
ENSMUSG00000060301	403.593	0.348097	0.113557	3.0654	0.0021738	0.0294689	2610008E11Rik	10	78900208	78933434	-1	RIKEN cDNA 2610008E11 gene [Source:MGI Symbol;Acc:MGI:1919378]	0.0386926
ENSMUSG00000020440	2906.62	-0.181405	0.0592042	-3.06406	0.00218356	0.0295757	Arf5	6	28423559	28426601	1	ADP-ribosylation factor 5 [Source:MGI Symbol;Acc:MGI:99434]	0.0388334
ENSMUSG00000070047	798.073	-0.333623	0.108912	-3.06324	0.00218954	0.0296312	Fat1	8	45388484	45505294	1	FAT atypical cadherin 1 [Source:MGI Symbol;Acc:MGI:109168]	0.0389068
ENSMUSG00000022312	2365.7	-0.224706	0.0733907	-3.06178	0.00220028	0.0297511	Eif3h	15	51649954	51728919	-1	eukaryotic translation initiation factor 3, subunit H [Source:MGI Symbol;Acc:MGI:1915385]	0.0390648
ENSMUSG00000027706	4767.36	-0.14846	0.048514	-3.06015	0.00221223	0.0298869	Sec62	3	30847024	30875412	1	SEC62 homolog (S. cerevisiae) [Source:MGI Symbol;Acc:MGI:1916526]	0.0392437
ENSMUSG00000015092	3065.75	-0.191159	0.0624845	-3.0593	0.00221857	0.029943	Edf1	2	25447859	25452094	1	endothelial differentiation-related factor 1 [Source:MGI Symbol;Acc:MGI:1891227]	0.0393186
ENSMUSG00000059901	38.6808	1.01638	0.332249	3.05908	0.00222018	0.029943	Adamts14	10	61032891	61109217	-1	a disintegrin-like and metallopeptidase (reprolysin type) with thrombospondin type 1 motif, 14 [Source:MGI Symbol;Acc:MGI:2179942]	0.0393186
ENSMUSG00000031791	2128.29	-0.195438	0.063904	-3.05831	0.0022259	0.0299743	Tmem38a	8	73325899	73341126	1	transmembrane protein 38A [Source:MGI Symbol;Acc:MGI:1921416]	0.0393608
ENSMUSG00000030421	702.926	-0.250615	0.0819472	-3.05825	0.00222631	0.0299743	Uri1	7	37659417	37722976	-1	URI1, prefoldin-like chaperone [Source:MGI Symbol;Acc:MGI:1342294]	0.0393608
ENSMUSG00000089917	446.575	0.481967	0.157691	3.0564	0.00224015	0.0301246	Uckl1	2	181210942	181226685	-1	uridine-cytidine kinase 1-like 1 [Source:MGI Symbol;Acc:MGI:1915806]	0.0395594
ENSMUSG00000031340	18.511	1.69091	0.553263	3.05624	0.0022413	0.0301246	Gabre	X	71299605	71318409	-1	gamma-aminobutyric acid (GABA) A receptor, subunit epsilon [Source:MGI Symbol;Acc:MGI:1330235]	0.0395594
ENSMUSG00000074637	562.345	0.321494	0.105235	3.05502	0.00225048	0.030222	Sox2	3	34704554	34706610	1	SRY (sex determining region Y)-box 2 [Source:MGI Symbol;Acc:MGI:98364]	0.039688
ENSMUSG00000066036	8943.26	-0.182539	0.0597647	-3.0543	0.00225587	0.0302687	Ubr4	4	139079920	139216899	1	ubiquitin protein ligase E3 component n-recognin 4 [Source:MGI Symbol;Acc:MGI:1916366]	0.0397498
ENSMUSG00000038406	5005.43	0.186824	0.0611828	3.05353	0.00226167	0.0303206	Scaf1	7	44652372	44665787	-1	SR-related CTD-associated factor 1 [Source:MGI Symbol;Acc:MGI:2141980]	0.0398187
ENSMUSG00000005621	837.93	0.413899	0.1357	3.05009	0.0022877	0.0306435	Zfp592	7	80643429	80694912	1	zinc finger protein 592 [Source:MGI Symbol;Acc:MGI:2443541]	0.0402432
ENSMUSG00000091896	6062.28	-0.147887	0.0485196	-3.04799	0.00230381	0.0308331	Ube2d2a	18	35904611	35942547	1	ubiquitin-conjugating enzyme E2D 2A [Source:MGI Symbol;Acc:MGI:1930715]	0.0404929
ENSMUSG00000039154	379.494	0.393756	0.129231	3.04691	0.00231205	0.0308993	Shd	17	56277467	56283625	1	src homology 2 domain-containing transforming protein D [Source:MGI Symbol;Acc:MGI:1099461]	0.0405816
ENSMUSG00000039199	788.568	0.286344	0.0939885	3.04658	0.0023146	0.0308993	Zdhhc1	8	106199055	106223534	-1	zinc finger, DHHC domain containing 1 [Source:MGI Symbol;Acc:MGI:1918046]	0.0405816
ENSMUSG00000063142	1680.58	-0.208252	0.068356	-3.04657	0.00231465	0.0308993	Kcnma1	14	23339499	24064559	-1	potassium large conductance calcium-activated channel, subfamily M, alpha member 1 [Source:MGI Symbol;Acc:MGI:99923]	0.0405816
ENSMUSG00000054793	2683.45	-0.168971	0.0554748	-3.04591	0.00231977	0.030925	Cadm4	7	24181448	24203964	1	cell adhesion molecule 4 [Source:MGI Symbol;Acc:MGI:2449088]	0.0406165
ENSMUSG00000062014	9570.02	-0.134808	0.0442602	-3.04582	0.0023205	0.030925	Gmfb	14	47045606	47059699	-1	glia maturation factor, beta [Source:MGI Symbol;Acc:MGI:1927133]	0.0406165
ENSMUSG00000011752	13547	-0.136259	0.0447577	-3.04437	0.00233168	0.0310476	Pgam1	19	41900362	41907099	1	phosphoglycerate mutase 1 [Source:MGI Symbol;Acc:MGI:97552]	0.0407781
ENSMUSG00000111496	10.7881	2.26328	0.743621	3.04359	0.00233773	NA	Gm47483	10	29227875	29229889	-1	predicted gene, 47483 [Source:MGI Symbol;Acc:MGI:6096458]	0.0408502
ENSMUSG00000065954	2807.53	0.221695	0.0728779	3.04201	0.00235004	0.0312657	Tacc1	8	25644568	25746604	-1	transforming, acidic coiled-coil containing protein 1 [Source:MGI Symbol;Acc:MGI:2443510]	0.0410312
ENSMUSG00000086583	4147.09	-0.331239	0.1089	-3.04168	0.00235259	0.0312731	Gm15500	7	114304452	114305470	-1	predicted pseudogene 15500 [Source:MGI Symbol;Acc:MGI:3782947]	0.0410415
ENSMUSG00000096967	11.0358	2.53275	0.832989	3.04056	0.00236136	NA	Gm26621	15	68206564	68209279	-1	predicted gene, 26621 [Source:MGI Symbol;Acc:MGI:5477115]	0.0411605
ENSMUSG00000028140	1034.17	-0.238977	0.0786071	-3.04014	0.00236467	0.0314072	Mrpl9	3	94350625	94358437	1	mitochondrial ribosomal protein L9 [Source:MGI Symbol;Acc:MGI:2137211]	0.041184
ENSMUSG00000031133	1197.2	0.242645	0.0798386	3.0392	0.00237206	0.0314789	Arhgef6	X	56276845	56384089	-1	Rac/Cdc42 guanine nucleotide exchange factor (GEF) 6 [Source:MGI Symbol;Acc:MGI:1920591]	0.0412786
ENSMUSG00000000088	3928.98	-0.163379	0.053762	-3.03894	0.00237412	0.0314796	Cox5a	9	57428557	57439709	1	cytochrome c oxidase subunit 5A [Source:MGI Symbol;Acc:MGI:88474]	0.0412803
ENSMUSG00000044533	6637.06	-0.181191	0.0596321	-3.03849	0.0023777	0.0315005	Rps2	17	24937090	24940903	1	ribosomal protein S2 [Source:MGI Symbol;Acc:MGI:105110]	0.0413084
ENSMUSG00000070372	2990.1	-0.163756	0.0539036	-3.03794	0.00238201	0.0315311	Capza1	3	104730095	104771821	-1	capping protein (actin filament) muscle Z-line, alpha 1 [Source:MGI Symbol;Acc:MGI:106227]	0.0413492
ENSMUSG00000055943	2569.74	-0.180774	0.0595191	-3.03724	0.00238759	0.0315698	Emc7	2	112285342	112302507	1	ER membrane protein complex subunit 7 [Source:MGI Symbol;Acc:MGI:1920274]	0.0414019
ENSMUSG00000066687	204.223	0.644166	0.212112	3.03691	0.00239015	0.0315698	Zbtb16	9	48565597	48747522	-1	zinc finger and BTB domain containing 16 [Source:MGI Symbol;Acc:MGI:103222]	0.0414019
ENSMUSG00000031565	9525.56	0.17936	0.0590618	3.03681	0.00239096	0.0315698	Fgfr1	8	26003670	26065734	1	fibroblast growth factor receptor 1 [Source:MGI Symbol;Acc:MGI:95522]	0.0414019
ENSMUSG00000024425	22421.3	-0.161306	0.0531365	-3.03569	0.00239989	0.0316129	Ndfip1	18	38543449	38598356	1	Nedd4 family interacting protein 1 [Source:MGI Symbol;Acc:MGI:1929601]	0.0414617
ENSMUSG00000042328	492.316	0.513207	0.16906	3.03566	0.00240013	0.0316129	Hps4	5	112490949	112526280	1	HPS4, biogenesis of lysosomal organelles complex 3 subunit 2 [Source:MGI Symbol;Acc:MGI:2177742]	0.0414617
ENSMUSG00000021606	1131.3	-0.314832	0.103716	-3.0355	0.00240135	0.0316129	Ndufs6	13	73467957	73476661	-1	NADH:ubiquinone oxidoreductase core subunit S6 [Source:MGI Symbol;Acc:MGI:107932]	0.0414617
ENSMUSG00000020612	25950.4	-0.130206	0.0428972	-3.03531	0.00240287	0.0316129	Prkar1a	11	109540231	109560482	1	protein kinase, cAMP dependent regulatory, type I, alpha [Source:MGI Symbol;Acc:MGI:104878]	0.0414617
ENSMUSG00000019804	3381.8	-0.162033	0.0533858	-3.03514	0.00240426	0.0316129	Snx3	10	42378026	42411377	1	sorting nexin 3 [Source:MGI Symbol;Acc:MGI:1860188]	0.0414617
ENSMUSG00000074646	18.7982	1.80536	0.594932	3.03458	0.00240874	0.0316454	6430550D23Rik	2	155815199	155849897	-1	RIKEN cDNA 6430550D23 gene [Source:MGI Symbol;Acc:MGI:2443361]	0.041505
ENSMUSG00000055301	23.0818	-1.63588	0.539175	-3.03404	0.00241301	0.031675	Adh7	3	137923521	137939143	1	alcohol dehydrogenase 7 (class IV), mu or sigma polypeptide [Source:MGI Symbol;Acc:MGI:87926]	0.0415444
ENSMUSG00000106099	14.9323	2.38177	0.785462	3.03231	0.00242688	0.0318305	Gm42664	3	119536857	119540095	-1	predicted gene 42664 [Source:MGI Symbol;Acc:MGI:5662801]	0.041749
ENSMUSG00000030200	112.561	-0.551917	0.182121	-3.0305	0.00244153	0.0319961	Bcl2l14	6	134373281	134415699	1	BCL2-like 14 (apoptosis facilitator) [Source:MGI Symbol;Acc:MGI:1914063]	0.0419668
ENSMUSG00000022580	312.358	0.479511	0.158267	3.02976	0.00244747	0.0320472	Rhpn1	15	75576129	75587334	1	rhophilin, Rho GTPase binding protein 1 [Source:MGI Symbol;Acc:MGI:1098783]	0.0420345
ENSMUSG00000026032	1946.84	-0.236526	0.0780926	-3.02879	0.00245534	0.0321235	Ndufb3	1	58625543	58635123	1	NADH:ubiquinone oxidoreductase subunit B3 [Source:MGI Symbol;Acc:MGI:1913745]	0.0421354
ENSMUSG00000114432	3.05217	-4.41796	1.45928	-3.02748	0.00246598	NA	Gm49391	13	61043164	61084385	-1	predicted gene, 49391 [Source:MGI Symbol;Acc:MGI:6121619]	0.0422785
ENSMUSG00000024423	2977.17	0.191631	0.0633015	3.02727	0.0024677	0.0322585	Impact	18	13088909	13126007	1	impact, RWD domain protein [Source:MGI Symbol;Acc:MGI:1098233]	0.0422785
ENSMUSG00000027673	1709.3	-0.238661	0.0788921	-3.02515	0.00248509	0.0324587	Ndufb5	3	32791139	32805715	1	NADH:ubiquinone oxidoreductase subunit B5 [Source:MGI Symbol;Acc:MGI:1913296]	0.0425417
ENSMUSG00000009281	440.664	-0.416454	0.137766	-3.02291	0.00250355	0.0326336	Rarres2	6	48546630	48549723	-1	retinoic acid receptor responder (tazarotene induced) 2 [Source:MGI Symbol;Acc:MGI:1918910]	0.0427382
ENSMUSG00000109727	13.5067	1.87299	0.619605	3.02288	0.00250381	0.0326336	Gm45464	8	91840390	91843299	-1	predicted gene 45464 [Source:MGI Symbol;Acc:MGI:5791300]	0.0427382
ENSMUSG00000036915	5.3978	3.52507	1.16614	3.02285	0.00250408	NA	Kirrel2	7	30146959	30157115	-1	kirre like nephrin family adhesion molecule 2 [Source:MGI Symbol;Acc:MGI:2442334]	0.0427382
ENSMUSG00000041769	1676.83	-0.230005	0.0760909	-3.02277	0.00250469	0.0326336	Ppp2r2d	7	138447808	138484786	1	protein phosphatase 2, regulatory subunit B, delta [Source:MGI Symbol;Acc:MGI:1289252]	0.0427382
ENSMUSG00000031556	1039.27	-0.217571	0.0720413	-3.02009	0.00252698	0.0328967	Tm2d2	8	25507227	25513276	1	TM2 domain containing 2 [Source:MGI Symbol;Acc:MGI:1916992]	0.0430835
ENSMUSG00000041642	685.71	0.259533	0.0859435	3.01981	0.00252932	0.0329	Kif21b	1	136059127	136105736	1	kinesin family member 21B [Source:MGI Symbol;Acc:MGI:109234]	0.0430885
ENSMUSG00000054051	356.933	0.468505	0.155167	3.01937	0.00253303	0.032921	Ercc6	14	32235478	32302947	1	excision repair cross-complementing rodent repair deficiency, complementation group 6 [Source:MGI Symbol;Acc:MGI:1100494]	0.0431169
ENSMUSG00000021754	626.931	0.346654	0.11488	3.01753	0.00254845	0.0330941	Map3k1	13	111882962	111945527	-1	mitogen-activated protein kinase kinase kinase 1 [Source:MGI Symbol;Acc:MGI:1346872]	0.0433442
ENSMUSG00000005640	167.044	0.682928	0.226343	3.01722	0.00255102	0.0331002	Insrr	3	87704258	87723408	1	insulin receptor-related receptor [Source:MGI Symbol;Acc:MGI:1346037]	0.0433529
ENSMUSG00000024914	1810.59	-0.208411	0.069083	-3.01682	0.00255445	0.0331173	Drap1	19	5472833	5475007	-1	Dr1 associated protein 1 (negative cofactor 2 alpha) [Source:MGI Symbol;Acc:MGI:1913806]	0.0433761
ENSMUSG00000022150	142.033	0.516107	0.171109	3.01625	0.00255918	0.0331339	Dab2	15	6329269	6470193	1	disabled 2, mitogen-responsive phosphoprotein [Source:MGI Symbol;Acc:MGI:109175]	0.04339
ENSMUSG00000027805	11693.7	-0.155183	0.0514505	-3.01617	0.00255994	0.0331339	Pfn2	3	57749316	57755500	-1	profilin 2 [Source:MGI Symbol;Acc:MGI:97550]	0.04339
ENSMUSG00000117943	9.90757	2.12339	0.704134	3.01561	0.00256465	NA	Gm50403	18	40479222	40484804	1	predicted gene, 50403 [Source:MGI Symbol;Acc:MGI:6303316]	0.04339
ENSMUSG00000020585	5236.52	-0.248621	0.082447	-3.01552	0.00256539	0.0331524	Laptm4a	12	8971664	8988742	1	lysosomal-associated protein transmembrane 4A [Source:MGI Symbol;Acc:MGI:108017]	0.04339
ENSMUSG00000004936	4553.53	-0.170939	0.0566867	-3.0155	0.00256558	0.0331524	Map2k1	9	64093052	64160913	-1	mitogen-activated protein kinase kinase 1 [Source:MGI Symbol;Acc:MGI:1346866]	0.04339
ENSMUSG00000042043	2144.57	-0.234404	0.0777638	-3.01431	0.00257561	0.0332475	Tbca	13	94925418	94979430	1	tubulin cofactor A [Source:MGI Symbol;Acc:MGI:107549]	0.043516
ENSMUSG00000109460	16.1235	1.77527	0.588984	3.01413	0.00257716	0.0332475	Gm45591	7	98970407	98971662	1	predicted gene 45591 [Source:MGI Symbol;Acc:MGI:5791427]	0.043516
ENSMUSG00000038002	721.679	0.28473	0.0944903	3.01332	0.00258403	0.0333087	Cramp1l	17	25180200	25234762	-1	cramped chromatin regulator homolog 1 [Source:MGI Symbol;Acc:MGI:1930190]	0.0435969
ENSMUSG00000075701	561.935	-0.272376	0.090465	-3.01084	0.00260526	0.033555	Selenos	7	65729397	65739153	1	selenoprotein S [Source:MGI Symbol;Acc:MGI:95994]	0.0439199
ENSMUSG00000016534	9992.77	-0.147335	0.0489417	-3.01041	0.00260893	0.0335747	Lamp2	X	37490234	37545331	-1	lysosomal-associated membrane protein 2 [Source:MGI Symbol;Acc:MGI:96748]	0.0439465
ENSMUSG00000025950	3721.06	-0.177232	0.0589017	-3.00895	0.00262154	0.0337096	Idh1	1	65197775	65225659	-1	isocitrate dehydrogenase 1 (NADP+), soluble [Source:MGI Symbol;Acc:MGI:96413]	0.0441237
ENSMUSG00000034748	451.124	0.323305	0.107471	3.00828	0.00262729	0.0337507	Sirt6	10	81457619	81463631	-1	sirtuin 6 [Source:MGI Symbol;Acc:MGI:1354161]	0.0441791
ENSMUSG00000029419	859.014	0.285903	0.0950448	3.00808	0.00262903	0.0337507	Ajm1	2	25465428	25471769	-1	apical junction component 1 [Source:MGI Symbol;Acc:MGI:2685842]	0.0441791
ENSMUSG00000022752	7265.29	-0.143125	0.0475874	-3.00762	0.00263302	0.0337743	Tomm70a	16	56942066	56977068	1	translocase of outer mitochondrial membrane 70A [Source:MGI Symbol;Acc:MGI:106295]	0.0442107
ENSMUSG00000021037	4313.23	-0.136612	0.0454298	-3.00709	0.00263758	0.0338037	Ahsa1	12	87313253	87320772	1	AHA1, activator of heat shock protein ATPase 1 [Source:MGI Symbol;Acc:MGI:2387603]	0.0442508
ENSMUSG00000033434	813.341	0.24485	0.0814303	3.00686	0.00263961	0.0338037	Gtpbp6	5	110251841	110256063	-1	GTP binding protein 6 (putative) [Source:MGI Symbol;Acc:MGI:1306825]	0.0442508
ENSMUSG00000046727	2880.13	-0.211306	0.0702853	-3.0064	0.00264362	0.0338276	Cystm1	18	36475573	36536150	1	cysteine-rich transmembrane module containing 1 [Source:MGI Symbol;Acc:MGI:1913310]	0.0442827
ENSMUSG00000021124	2569.01	-0.188931	0.0628965	-3.00384	0.00266598	0.0340602	Vti1b	12	79202791	79219441	-1	vesicle transport through interaction with t-SNAREs 1B [Source:MGI Symbol;Acc:MGI:1855688]	0.0445652
ENSMUSG00000054426	177.232	-0.477076	0.158823	-3.00382	0.00266613	0.0340602	A930005H10Rik	3	115675230	115681779	-1	RIKEN cDNA A930005H10 gene [Source:MGI Symbol;Acc:MGI:1915411]	0.0445652
ENSMUSG00000102562	7.35133	2.56582	0.854208	3.00374	0.00266684	NA	Gm37694	16	77482165	77484297	1	predicted gene, 37694 [Source:MGI Symbol;Acc:MGI:5610922]	0.0445652
ENSMUSG00000107749	9.12839	2.52577	0.841203	3.00257	0.0026771	NA	Gm44321	6	71253478	71256332	1	predicted gene, 44321 [Source:MGI Symbol;Acc:MGI:5690713]	0.044666
ENSMUSG00000030397	3278.23	0.16818	0.0560164	3.00234	0.00267913	0.0341722	Mark4	7	19158700	19192746	-1	MAP/microtubule affinity regulating kinase 4 [Source:MGI Symbol;Acc:MGI:1920955]	0.044666
ENSMUSG00000024290	643.641	0.346958	0.115563	3.00233	0.00267924	0.0341722	Rock1	18	10064401	10182045	-1	Rho-associated coiled-coil containing protein kinase 1 [Source:MGI Symbol;Acc:MGI:107927]	0.044666
ENSMUSG00000097736	117.586	0.704699	0.234792	3.00137	0.00268766	0.0342519	9530059O14Rik	9	122401564	122508661	1	RIKEN cDNA 9530059O14 gene [Source:MGI Symbol;Acc:MGI:2442421]	0.044771
ENSMUSG00000089847	549.853	-0.302108	0.100726	-2.99929	0.00270611	0.0344591	Timm10b	7	105289263	105292844	1	translocase of inner mitochondrial membrane 10B [Source:MGI Symbol;Acc:MGI:1315196]	0.0450426
ENSMUSG00000051256	791.998	-0.271279	0.0904638	-2.99876	0.0027108	0.0344909	Jagn1	6	113419530	113425190	1	jagunal homolog 1 [Source:MGI Symbol;Acc:MGI:1915017]	0.045085
ENSMUSG00000015312	273.256	0.400062	0.133616	2.99411	0.00275244	0.0349924	Gadd45b	10	80765907	80768038	1	growth arrest and DNA-damage-inducible 45 beta [Source:MGI Symbol;Acc:MGI:107776]	0.0457413
ENSMUSG00000027282	3369.05	-0.161974	0.0541115	-2.99334	0.00275946	0.0350533	Mtch2	2	90677499	90697154	1	mitochondrial carrier 2 [Source:MGI Symbol;Acc:MGI:1929260]	0.0458218
ENSMUSG00000028648	2035.93	-0.244739	0.0818221	-2.99111	0.00277966	0.0352815	Ndufs5	4	123606503	123611995	-1	NADH:ubiquinone oxidoreductase core subunit S5 [Source:MGI Symbol;Acc:MGI:1890889]	0.0461209
ENSMUSG00000060445	7.90044	2.5754	0.861333	2.99001	0.00278965	NA	Sycp2	2	177987086	178049478	-1	synaptonemal complex protein 2 [Source:MGI Symbol;Acc:MGI:1933281]	0.0462237
ENSMUSG00000026135	750.878	0.295253	0.0987493	2.98993	0.00279045	0.0353868	Zfp142	1	74604286	74627405	-1	zinc finger protein 142 [Source:MGI Symbol;Acc:MGI:1924514]	0.0462237
ENSMUSG00000045282	95.3578	0.726708	0.24307	2.98971	0.00279245	0.0353868	Tmem86b	7	4631039	4634421	-1	transmembrane protein 86B [Source:MGI Symbol;Acc:MGI:1915505]	0.0462237
ENSMUSG00000060904	3219.59	-0.272523	0.0911702	-2.98917	0.00279735	0.0354204	Arl1	10	88566720	88579956	1	ADP-ribosylation factor-like 1 [Source:MGI Symbol;Acc:MGI:99436]	0.0462685
ENSMUSG00000000326	1659.69	-0.186528	0.0624632	-2.98621	0.00282462	0.0357369	Comt	16	18225636	18245602	-1	catechol-O-methyltransferase [Source:MGI Symbol;Acc:MGI:88470]	0.0466828
ENSMUSG00000039745	1790.76	-0.170726	0.0571888	-2.98531	0.00283292	0.0358041	Htatip2	7	49408863	49423723	1	HIV-1 Tat interactive protein 2 [Source:MGI Symbol;Acc:MGI:1859271]	0.0467723
ENSMUSG00000024246	48.3044	0.86196	0.28875	2.98514	0.00283448	0.0358041	Thumpd2	17	81333761	81372511	-1	THUMP domain containing 2 [Source:MGI Symbol;Acc:MGI:1919417]	0.0467723
ENSMUSG00000072694	1720.71	-0.184032	0.0616586	-2.98469	0.0028387	0.0358286	1500011B03Rik	5	114946257	114961529	-1	RIKEN cDNA 1500011B03 gene [Source:MGI Symbol;Acc:MGI:1913486]	0.0468052
ENSMUSG00000022000	905.371	0.248072	0.0831231	2.9844	0.00284138	0.0358337	Zc3h13	14	75521813	75581866	1	zinc finger CCCH type containing 13 [Source:MGI Symbol;Acc:MGI:1914552]	0.0468127
ENSMUSG00000027309	1393.8	0.327216	0.109666	2.98375	0.00284735	0.0358803	4930402H24Rik	2	130548120	130748326	-1	RIKEN cDNA 4930402H24 gene [Source:MGI Symbol;Acc:MGI:1923029]	0.0468744
ENSMUSG00000079710	9.75589	2.38346	0.799517	2.98113	0.0028719	NA	Dynlt2a2	17	15216049	15261799	-1	dynein light chain Tctex-type 2A2 [Source:MGI Symbol;Acc:MGI:3809205]	0.0472415
ENSMUSG00000089762	163.614	0.491014	0.164758	2.98021	0.00288053	0.0362328	Ier5l	2	30361549	30364231	-1	immediate early response 5-like [Source:MGI Symbol;Acc:MGI:1919750]	0.0473006
ENSMUSG00000047714	15410.6	-0.181724	0.0609783	-2.98014	0.00288114	0.0362328	Ppp1r2	16	31070355	31094095	-1	protein phosphatase 1, regulatory inhibitor subunit 2 [Source:MGI Symbol;Acc:MGI:1914099]	0.0473006
ENSMUSG00000025223	2111.82	0.222578	0.07469	2.98003	0.00288223	0.0362328	Ldb1	19	46020009	46033653	-1	LIM domain binding 1 [Source:MGI Symbol;Acc:MGI:894762]	0.0473006
ENSMUSG00000068747	2025.79	-0.184029	0.0618125	-2.97721	0.00290881	0.0365115	Sort1	3	108191398	108268827	1	sortilin 1 [Source:MGI Symbol;Acc:MGI:1338015]	0.0476662
ENSMUSG00000100252	75.0142	0.887079	0.297959	2.97719	0.00290905	0.0365115	Mir124-2hg	3	17844085	17863134	1	Mir124-2 host gene (non-protein coding) [Source:MGI Symbol;Acc:MGI:1917691]	0.0476662
ENSMUSG00000022656	1065.07	-0.248177	0.083367	-2.97693	0.00291153	0.0365136	Nectin3	16	46208069	46318888	-1	nectin cell adhesion molecule 3 [Source:MGI Symbol;Acc:MGI:1930171]	0.0476698
ENSMUSG00000050605	195.391	0.631482	0.212196	2.97594	0.00292093	0.0365685	Zfp61	7	23990464	24000657	-1	zinc finger protein 61 [Source:MGI Symbol;Acc:MGI:99663]	0.0477442
ENSMUSG00000010505	1437.99	-0.295727	0.0993782	-2.97578	0.00292246	0.0365685	Myt1	2	181405125	181469590	1	myelin transcription factor 1 [Source:MGI Symbol;Acc:MGI:1100535]	0.0477442
ENSMUSG00000072825	5050.7	0.199093	0.0669056	2.97573	0.00292288	0.0365685	Cep170b	12	112686889	112713026	1	centrosomal protein 170B [Source:MGI Symbol;Acc:MGI:2145043]	0.0477442
ENSMUSG00000041417	5409.43	-0.206041	0.0692515	-2.97526	0.00292742	0.0365963	Pik3r1	13	101817071	101904725	-1	phosphoinositide-3-kinase regulatory subunit 1 [Source:MGI Symbol;Acc:MGI:97583]	0.0477813
ENSMUSG00000028631	2324.88	0.206061	0.0692732	2.97461	0.0029336	0.0366444	Kcnq4	4	120553335	120605809	-1	potassium voltage-gated channel, subfamily Q, member 4 [Source:MGI Symbol;Acc:MGI:1926803]	0.047845
ENSMUSG00000075700	9116.67	-0.172553	0.0580503	-2.97248	0.00295403	0.0368659	Selenot	3	58484057	58500554	1	selenoprotein T [Source:MGI Symbol;Acc:MGI:1916477]	0.048136
ENSMUSG00000078485	74.351	0.785644	0.264324	2.97227	0.00295602	0.0368659	Plekhn1	4	156305913	156314174	-1	pleckstrin homology domain containing, family N member 1 [Source:MGI Symbol;Acc:MGI:2387630]	0.048136
ENSMUSG00000001119	88.9175	0.887823	0.298787	2.97143	0.00296421	0.0369388	Col6a1	10	76544626	76562002	-1	collagen, type VI, alpha 1 [Source:MGI Symbol;Acc:MGI:88459]	0.048232
ENSMUSG00000107512	14.1457	1.99978	0.673174	2.97067	0.0029715	0.0370003	Gm44433	6	77405661	77410492	-1	predicted gene, 44433 [Source:MGI Symbol;Acc:MGI:5690825]	0.0483132
ENSMUSG00000002274	776.715	-0.379383	0.127749	-2.96974	0.0029805	0.0370831	Metrn	17	26012195	26016110	-1	meteorin, glial cell differentiation regulator [Source:MGI Symbol;Acc:MGI:1917333]	0.0484222
ENSMUSG00000022108	19665.8	-0.172482	0.0580901	-2.96922	0.00298558	0.0371101	Itm2b	14	73599666	73622729	-1	integral membrane protein 2B [Source:MGI Symbol;Acc:MGI:1309517]	0.0484601
ENSMUSG00000028906	4048.94	0.217283	0.0731841	2.96899	0.00298778	0.0371101	Epb41	4	131650724	131802632	-1	erythrocyte membrane protein band 4.1 [Source:MGI Symbol;Acc:MGI:95401]	0.0484601
ENSMUSG00000024665	5182.69	-0.209744	0.0706497	-2.96879	0.00298974	0.0371101	Fads2	19	10040129	10079110	-1	fatty acid desaturase 2 [Source:MGI Symbol;Acc:MGI:1930079]	0.0484601
ENSMUSG00000008855	1742.17	0.25275	0.0851841	2.9671	0.00300624	0.0372854	Hdac5	11	102085258	102120992	-1	histone deacetylase 5 [Source:MGI Symbol;Acc:MGI:1333784]	0.0486899
ENSMUSG00000016496	282.947	-0.502511	0.169398	-2.96646	0.00301251	0.0373337	Cd274	19	29344855	29365495	1	CD274 antigen [Source:MGI Symbol;Acc:MGI:1926446]	0.0487539
ENSMUSG00000034551	163.626	0.548377	0.184942	2.96514	0.00302549	0.0374628	Hdx	X	110479628	110606776	-1	highly divergent homeobox [Source:MGI Symbol;Acc:MGI:2685226]	0.0489214
ENSMUSG00000033170	518.923	0.324075	0.109303	2.96491	0.00302768	0.0374628	Card10	15	78659338	78687242	-1	caspase recruitment domain family, member 10 [Source:MGI Symbol;Acc:MGI:2146012]	0.0489214
ENSMUSG00000108802	11.7263	1.97761	0.667055	2.96469	0.00302991	NA	Gm44769	6	71767652	71770460	1	predicted gene 44769 [Source:MGI Symbol;Acc:MGI:5753345]	0.0489214
ENSMUSG00000062151	990.813	-0.248935	0.0839731	-2.96446	0.00303215	0.0374887	Unc13c	9	73386704	73876248	-1	unc-13 homolog C [Source:MGI Symbol;Acc:MGI:2149021]	0.0489214
ENSMUSG00000036026	6386.53	0.179982	0.0607461	2.96285	0.00304804	0.0376555	Tmem63b	17	45971097	45997831	-1	transmembrane protein 63b [Source:MGI Symbol;Acc:MGI:2387609]	0.0491401
ENSMUSG00000108465	11.9698	2.12662	0.718294	2.96066	0.00306985	NA	Gm45110	7	127054641	127056042	1	predicted gene 45110 [Source:MGI Symbol;Acc:MGI:5753686]	0.0494538
ENSMUSG00000087382	16.1101	2.1563	0.728379	2.9604	0.00307237	0.0379263	Ctcflos	2	172952611	172974997	1	CCCTC-binding factor (zinc finger protein)-like, opposite strand [Source:MGI Symbol;Acc:MGI:1921411]	0.0494565
ENSMUSG00000025016	5948.24	-0.141606	0.0478908	-2.95685	0.00310798	0.0383107	Tm9sf3	19	41199283	41252436	-1	transmembrane 9 superfamily member 3 [Source:MGI Symbol;Acc:MGI:1914262]	0.0499596
ENSMUSG00000025142	1314.03	0.218973	0.0740572	2.95681	0.00310838	0.0383107	Aspscr1	11	120563799	120600273	1	alveolar soft part sarcoma chromosome region, candidate 1 (human) [Source:MGI Symbol;Acc:MGI:1916188]	0.0499596
ENSMUSG00000069135	753.899	0.245168	0.0829311	2.95629	0.00311367	0.0383209	Cep43	17	8384333	8415636	1	centrosomal protein 43 [Source:MGI Symbol;Acc:MGI:1922546]	0.0499749
ENSMUSG00000021981	3731.3	-0.166411	0.0562914	-2.95625	0.00311408	0.0383209	Cab39l	14	59678421	59823213	1	calcium binding protein 39-like [Source:MGI Symbol;Acc:MGI:1914081]	0.0499749
ENSMUSG00000044573	2680.99	-0.172696	0.0584304	-2.95558	0.00312083	0.038374	Acp1	12	30943325	30961588	-1	acid phosphatase 1, soluble [Source:MGI Symbol;Acc:MGI:87881]	0.0500451
ENSMUSG00000051586	1537.32	0.272795	0.092309	2.95524	0.00312427	0.0383863	Mical3	6	120908668	121107959	-1	microtubule associated monooxygenase, calponin and LIM domain containing 3 [Source:MGI Symbol;Acc:MGI:2442733]	0.0500621
ENSMUSG00000020692	209.578	0.571212	0.193316	2.9548	0.00312871	0.0384108	Nle1	11	82791594	82799237	-1	notchless homolog 1 [Source:MGI Symbol;Acc:MGI:2429770]	0.050095
ENSMUSG00000036002	1779.16	0.212667	0.0719796	2.95454	0.00313132	0.0384129	Fam214b	4	43032414	43046220	-1	family with sequence similarity 214, member B [Source:MGI Symbol;Acc:MGI:2441854]	0.0500987
ENSMUSG00000000600	951.141	0.237564	0.0804553	2.95274	0.00314965	0.0386032	Krit1	5	3853184	3895564	1	KRIT1, ankyrin repeat containing [Source:MGI Symbol;Acc:MGI:1930618]	0.0503488
ENSMUSG00000040565	1341.38	0.342612	0.11604	2.95254	0.00315173	0.0386032	Btaf1	19	36903479	36990152	1	B-TFIID TATA-box binding protein associated factor 1 [Source:MGI Symbol;Acc:MGI:2147538]	0.0503488
ENSMUSG00000031378	341.102	0.405727	0.13744	2.95202	0.00315699	0.0386376	Abcd1	X	72760203	72782140	1	ATP-binding cassette, sub-family D (ALD), member 1 [Source:MGI Symbol;Acc:MGI:1349215]	0.0503945
ENSMUSG00000039852	2750.11	0.214472	0.0727135	2.94955	0.00318239	0.0389182	Rere	4	150366103	150706423	1	arginine glutamic acid dipeptide (RE) repeats [Source:MGI Symbol;Acc:MGI:2683486]	0.0507615
ENSMUSG00000021458	1567.37	0.329182	0.111647	2.94842	0.00319407	0.0390307	Aopep	13	63112707	63473910	1	aminopeptidase O [Source:MGI Symbol;Acc:MGI:1919311]	0.0509092
ENSMUSG00000035125	56.4937	0.822074	0.278889	2.94768	0.00320173	0.0390939	Gcfc2	6	81900650	81936896	1	GC-rich sequence DNA binding factor 2 [Source:MGI Symbol;Acc:MGI:2141656]	0.0509926
ENSMUSG00000034566	3872.67	-0.247346	0.0840081	-2.94431	0.00323673	0.0394709	Atp5h	11	115306515	115310788	-1	ATP synthase, H+ transporting, mitochondrial F0 complex, subunit D [Source:MGI Symbol;Acc:MGI:1918929]	0.0514863
ENSMUSG00000029587	537.533	0.30849	0.104778	2.94423	0.00323763	0.0394709	Zfp12	5	143220918	143234589	1	zinc finger protein 12 [Source:MGI Symbol;Acc:MGI:99157]	0.0514863
ENSMUSG00000024012	10061	-0.147866	0.0502283	-2.94387	0.00324133	0.0394855	Mtch1	17	29551046	29566908	-1	mitochondrial carrier 1 [Source:MGI Symbol;Acc:MGI:1929261]	0.0515063
ENSMUSG00000004394	1750.56	-0.187139	0.0635908	-2.94286	0.00325192	0.0395838	Tmed4	11	6220369	6224870	-1	transmembrane p24 trafficking protein 4 [Source:MGI Symbol;Acc:MGI:1915070]	0.0516355
ENSMUSG00000073940	255.829	1.88345	0.64008	2.94251	0.00325559	0.039598	Hbb-bt	7	103461731	103463203	-1	hemoglobin, beta adult t chain [Source:MGI Symbol;Acc:MGI:5474850]	0.0516549
ENSMUSG00000007610	754.496	0.268198	0.0911662	2.94186	0.00326246	0.0396508	Gtpbp3	8	71940747	71952227	1	GTP binding protein 3 [Source:MGI Symbol;Acc:MGI:1917609]	0.0517248
ENSMUSG00000023036	774.095	-0.509965	0.173464	-2.93989	0.00328329	0.0398733	Pcdhgc4	18	37948132	37974926	1	protocadherin gamma subfamily C, 4 [Source:MGI Symbol;Acc:MGI:1935203]	0.0520159
ENSMUSG00000115624	16.0331	1.69043	0.575761	2.93599	0.00332487	0.040347	Gm49204	14	49261387	49266026	-1	predicted gene, 49204 [Source:MGI Symbol;Acc:MGI:6118653]	0.052635
ENSMUSG00000036503	3627.65	-0.194122	0.0661269	-2.93561	0.00332897	0.0403643	Rnf13	3	57643483	57742654	1	ring finger protein 13 [Source:MGI Symbol;Acc:MGI:1346341]	0.0526595
ENSMUSG00000029447	5863.97	-0.15641	0.0532845	-2.93538	0.00333142	0.0403643	Cct6a	5	129864062	129875212	1	chaperonin containing Tcp1, subunit 6a (zeta) [Source:MGI Symbol;Acc:MGI:107943]	0.0526595
ENSMUSG00000039367	2662.7	0.217811	0.0742152	2.93485	0.00333707	0.0404017	Sec24c	14	20724376	20744920	1	Sec24 related gene family, member C (S. cerevisiae) [Source:MGI Symbol;Acc:MGI:1919746]	0.0527092
ENSMUSG00000020827	7606.04	0.2263	0.0771229	2.93428	0.00334327	0.0404456	Mink1	11	70453707	70505309	1	misshapen-like kinase 1 (zebrafish) [Source:MGI Symbol;Acc:MGI:1355329]	0.0527675
ENSMUSG00000027430	748.367	-0.22827	0.077831	-2.93289	0.00335824	0.0405955	Dtd1	2	144441817	144610678	1	D-tyrosyl-tRNA deacylase 1 [Source:MGI Symbol;Acc:MGI:1913294]	0.052964
ENSMUSG00000017831	4742.5	-0.141534	0.0482807	-2.93149	0.00337344	0.0407479	Rab5a	17	53786262	53814708	1	RAB5A, member RAS oncogene family [Source:MGI Symbol;Acc:MGI:105926]	0.0531639
ENSMUSG00000031833	1076.02	0.217715	0.0742746	2.93122	0.00337629	0.0407511	Mast3	8	71230761	71257698	-1	microtubule associated serine/threonine kinase 3 [Source:MGI Symbol;Acc:MGI:2683541]	0.053169
ENSMUSG00000022543	160.158	0.610175	0.208185	2.93092	0.0033796	0.0407598	4930451G09Rik	16	4782153	4796826	1	RIKEN cDNA 4930451G09 gene [Source:MGI Symbol;Acc:MGI:1921934]	0.0531814
ENSMUSG00000016503	456.951	-0.299368	0.102179	-2.92984	0.00339133	0.04087	Gtf3a	5	146885467	146892424	1	general transcription factor III A [Source:MGI Symbol;Acc:MGI:1913846]	0.053326
ENSMUSG00000029127	111.997	0.828985	0.283052	2.92873	0.00340345	0.0409703	Zbtb49	5	38347079	38377801	-1	zinc finger and BTB domain containing 49 [Source:MGI Symbol;Acc:MGI:1922329]	0.053459
ENSMUSG00000027170	1581.3	-0.239912	0.0819201	-2.92861	0.00340487	0.0409703	Eif3m	2	104830001	104847425	-1	eukaryotic translation initiation factor 3, subunit M [Source:MGI Symbol;Acc:MGI:1351744]	0.053459
ENSMUSG00000103804	2.65588	4.70013	1.60507	2.9283	0.00340824	NA	Gm37062	1	38115376	38116386	-1	predicted gene, 37062 [Source:MGI Symbol;Acc:MGI:5610290]	0.0534721
ENSMUSG00000021024	2705.94	-0.235642	0.0804888	-2.92763	0.00341551	0.041067	Psma6	12	55431007	55465239	1	proteasome subunit alpha 6 [Source:MGI Symbol;Acc:MGI:1347006]	0.0535461
ENSMUSG00000115222	10.5154	1.90085	0.649412	2.92702	0.00342223	NA	Gm49747	14	55881061	55883809	1	predicted gene, 49747 [Source:MGI Symbol;Acc:MGI:6215240]	0.0536115
ENSMUSG00000040146	99.4541	0.771309	0.263542	2.9267	0.00342574	0.0411586	Rgl3	9	21880007	21900742	-1	ral guanine nucleotide dissociation stimulator-like 3 [Source:MGI Symbol;Acc:MGI:1918996]	0.0536267
ENSMUSG00000018171	1833.1	-0.27057	0.0924593	-2.92637	0.00342948	0.041172	Vmp1	11	86474691	86574662	-1	vacuole membrane protein 1 [Source:MGI Symbol;Acc:MGI:1923159]	0.0536452
ENSMUSG00000032498	347.848	0.377905	0.129149	2.92613	0.0034321	0.0411721	Mlh1	9	111057296	111100859	-1	mutL homolog 1 [Source:MGI Symbol;Acc:MGI:101938]	0.0536463
ENSMUSG00000035868	425.277	0.322969	0.110502	2.92274	0.00346966	0.0415911	Zfp983	17	21869545	21883882	1	zinc finger protein 983 [Source:MGI Symbol;Acc:MGI:1920479]	0.0541932
ENSMUSG00000057649	1174.27	0.263284	0.090096	2.92226	0.00347501	0.0416234	Brd9	13	74085930	74109014	1	bromodomain containing 9 [Source:MGI Symbol;Acc:MGI:2145317]	0.0542364
ENSMUSG00000019737	228.687	0.534698	0.182995	2.92193	0.00347866	0.0416354	Syne4	7	30014232	30018471	1	spectrin repeat containing, nuclear envelope family member 4 [Source:MGI Symbol;Acc:MGI:2141950]	0.0542531
ENSMUSG00000073434	121.047	1.07353	0.367434	2.92168	0.00348145	0.0416371	Wdr90	17	26063745	26080475	-1	WD repeat domain 90 [Source:MGI Symbol;Acc:MGI:1921267]	0.0542564
ENSMUSG00000030279	1595.28	0.208188	0.0712625	2.92142	0.00348441	0.0416409	C2cd5	6	142956646	143045867	-1	C2 calcium-dependent domain containing 5 [Source:MGI Symbol;Acc:MGI:1921991]	0.0542623
ENSMUSG00000028857	1006.9	-0.207967	0.0711977	-2.92098	0.00348935	0.0416683	Tmem222	4	132993356	133005103	-1	transmembrane protein 222 [Source:MGI Symbol;Acc:MGI:1098568]	0.0542991
ENSMUSG00000038990	1098.53	0.21874	0.0749229	2.91954	0.00350552	0.0418297	Cables2	2	179900333	179915289	-1	CDK5 and Abl enzyme substrate 2 [Source:MGI Symbol;Acc:MGI:2182335]	0.0545104
ENSMUSG00000020844	597.827	-0.256592	0.0879135	-2.91868	0.00351515	0.0419129	Nxn	11	76148024	76289966	-1	nucleoredoxin [Source:MGI Symbol;Acc:MGI:109331]	0.0546199
ENSMUSG00000022241	1092.7	0.239774	0.0822224	2.91616	0.00354368	0.042221	Tars	15	11382387	11399751	-1	threonyl-tRNA synthetase [Source:MGI Symbol;Acc:MGI:106314]	0.0550225
ENSMUSG00000039308	210.454	0.515756	0.176963	2.91449	0.00356269	0.0424155	Ndst2	14	20773798	20784630	-1	N-deacetylase/N-sulfotransferase (heparan glucosaminyl) 2 [Source:MGI Symbol;Acc:MGI:97040]	0.0552769
ENSMUSG00000024891	297.718	0.354273	0.121577	2.91398	0.00356849	0.0424524	Slc29a2	19	5073888	5082000	1	solute carrier family 29 (nucleoside transporters), member 2 [Source:MGI Symbol;Acc:MGI:1345278]	0.0553261
ENSMUSG00000009739	1562.45	0.192424	0.0660567	2.91301	0.00357968	0.0425533	Pou6f1	15	100473199	100497865	-1	POU domain, class 6, transcription factor 1 [Source:MGI Symbol;Acc:MGI:102935]	0.0554587
ENSMUSG00000034275	1073.47	0.278581	0.0956823	2.91152	0.00359679	0.0427237	Igsf9b	9	27210500	27268842	1	immunoglobulin superfamily, member 9B [Source:MGI Symbol;Acc:MGI:2685354]	0.0556827
ENSMUSG00000000078	1774.64	0.173282	0.0595237	2.91114	0.00360112	0.0427237	Klf6	13	5911481	5920393	1	Kruppel-like factor 6 [Source:MGI Symbol;Acc:MGI:1346318]	0.0556839
ENSMUSG00000027076	443.359	-0.294952	0.101322	-2.91105	0.00360216	0.0427237	Timm10	2	84657341	84660557	1	translocase of inner mitochondrial membrane 10 [Source:MGI Symbol;Acc:MGI:1353429]	0.0556839
ENSMUSG00000049536	563.22	-0.272008	0.093501	-2.90914	0.00362419	0.0429343	Tceal1	X	135608731	135612227	1	transcription elongation factor A (SII)-like 1 [Source:MGI Symbol;Acc:MGI:2385317]	0.0559605
ENSMUSG00000054455	10312	-0.127149	0.043708	-2.90904	0.00362537	0.0429343	Vapb	2	173579304	173626132	1	vesicle-associated membrane protein, associated protein B and C [Source:MGI Symbol;Acc:MGI:1928744]	0.0559605
ENSMUSG00000053192	7533.07	-0.139361	0.047927	-2.90778	0.00364003	0.0430755	Mllt11	3	95126446	95139482	-1	myeloid/lymphoid or mixed-lineage leukemia; translocated to, 11 [Source:MGI Symbol;Acc:MGI:1929671]	0.0561456
ENSMUSG00000092232	2.6611	4.7032	1.61795	2.90688	0.00365054	NA	Gm20521	14	55120898	55135594	1	predicted gene 20521 [Source:MGI Symbol;Acc:MGI:5141986]	0.0562531
ENSMUSG00000038668	2980.64	-0.36931	0.127054	-2.90672	0.00365235	0.0431888	Lpar1	4	58435255	58553898	-1	lysophosphatidic acid receptor 1 [Source:MGI Symbol;Acc:MGI:108429]	0.0562531
ENSMUSG00000038126	252.042	0.426257	0.146771	2.90422	0.00368167	0.0435029	Mphosph9	5	124389022	124466035	-1	M-phase phosphoprotein 9 [Source:MGI Symbol;Acc:MGI:2443138]	0.0566632
ENSMUSG00000030844	2193.97	-0.220816	0.0761275	-2.90061	0.00372432	0.0439614	Rgs10	7	127975345	128020482	-1	regulator of G-protein signalling 10 [Source:MGI Symbol;Acc:MGI:1915115]	0.0572638
ENSMUSG00000058290	46.847	1.64772	0.568106	2.90038	0.00372707	0.0439614	Espl1	15	102204701	102232792	1	extra spindle pole bodies 1, separase [Source:MGI Symbol;Acc:MGI:2146156]	0.0572638
ENSMUSG00000069919	707.084	2.0322	0.700704	2.90023	0.00372886	0.0439614	Hba-a1	11	32233511	32234465	1	hemoglobin alpha, adult chain 1 [Source:MGI Symbol;Acc:MGI:96015]	0.0572638
ENSMUSG00000062963	2229.73	-0.199581	0.0688255	-2.89981	0.00373391	0.043985	Ufc1	1	171116136	171122597	-1	ubiquitin-fold modifier conjugating enzyme 1 [Source:MGI Symbol;Acc:MGI:1913405]	0.0572967
ENSMUSG00000025616	874.093	-0.281129	0.0969546	-2.8996	0.00373645	0.043985	Usp16	16	87251591	87280405	1	ubiquitin specific peptidase 16 [Source:MGI Symbol;Acc:MGI:1921362]	0.0572967
ENSMUSG00000035401	647.467	0.261515	0.0902124	2.89888	0.003745	0.0440527	Emsy	7	98236344	98305990	-1	EMSY, BRCA2-interacting transcriptional repressor [Source:MGI Symbol;Acc:MGI:1924203]	0.057386
ENSMUSG00000104830	4.62201	4.27878	1.47776	2.89545	0.00378611	NA	5830487J09Rik	5	123504535	123506982	1	RIKEN cDNA 5830487J09 gene [Source:MGI Symbol;Acc:MGI:1923368]	0.0579737
ENSMUSG00000028383	2921.99	-0.151093	0.0522186	-2.89347	0.00381008	0.0447848	Hsdl2	4	59581563	59618689	1	hydroxysteroid dehydrogenase like 2 [Source:MGI Symbol;Acc:MGI:1919729]	0.0582984
ENSMUSG00000028661	32.4807	1.18532	0.409849	2.89209	0.00382688	0.0449487	Epha8	4	136656730	136684127	-1	Eph receptor A8 [Source:MGI Symbol;Acc:MGI:109378]	0.0585129
ENSMUSG00000018339	1443.56	-0.373223	0.129101	-2.89094	0.00384097	0.0450805	Gpx3	11	54793279	54801203	1	glutathione peroxidase 3 [Source:MGI Symbol;Acc:MGI:105102]	0.0586856
ENSMUSG00000041530	758.462	0.253484	0.087702	2.89029	0.00384891	0.0451401	Ago1	4	126328805	126362376	-1	argonaute RISC catalytic subunit 1 [Source:MGI Symbol;Acc:MGI:2446630]	0.0587644
ENSMUSG00000020018	262.027	-0.348889	0.120765	-2.88899	0.00386482	0.0452929	Snrpf	10	93418891	93425568	-1	small nuclear ribonucleoprotein polypeptide F [Source:MGI Symbol;Acc:MGI:1917128]	0.0589644
ENSMUSG00000031537	872.829	0.273354	0.0946273	2.88874	0.00386783	0.0452945	Ikbkb	8	23149228	23196605	-1	inhibitor of kappaB kinase beta [Source:MGI Symbol;Acc:MGI:1338071]	0.0589676
ENSMUSG00000051920	1639.5	-0.181291	0.0627817	-2.88764	0.00388146	0.0454203	Rspo2	15	42884190	43034222	-1	R-spondin 2 [Source:MGI Symbol;Acc:MGI:1922667]	0.0591325
ENSMUSG00000006276	1936.06	0.23886	0.0827459	2.88667	0.00389338	0.0455259	Eps15l1	8	73094843	73175304	-1	epidermal growth factor receptor pathway substrate 15-like 1 [Source:MGI Symbol;Acc:MGI:104582]	0.0592712
ENSMUSG00000042605	2857.48	0.271249	0.0939829	2.88616	0.00389977	0.0455669	Atxn2	5	121849400	121954556	1	ataxin 2 [Source:MGI Symbol;Acc:MGI:1277223]	0.0593256
ENSMUSG00000034731	16807.1	-0.201958	0.0699859	-2.88569	0.00390558	0.0456009	Dgkh	14	78796190	78970216	-1	diacylglycerol kinase, eta [Source:MGI Symbol;Acc:MGI:2444188]	0.0593711
ENSMUSG00000117819	105.856	0.866798	0.30054	2.88413	0.00392495	0.045793	Gm50253	17	27192191	27255352	1	predicted gene, 50253 [Source:MGI Symbol;Acc:MGI:6303071]	0.0596224
ENSMUSG00000078853	757.617	-0.501194	0.173885	-2.88233	0.00394743	0.0460212	Igtp	11	58090382	58098417	1	interferon gamma induced GTPase [Source:MGI Symbol;Acc:MGI:107729]	0.0599206
ENSMUSG00000033917	4578.84	-0.159322	0.0553097	-2.88053	0.00397001	0.0462502	Gde1	7	118287768	118305001	-1	glycerophosphodiester phosphodiesterase 1 [Source:MGI Symbol;Acc:MGI:1891827]	0.0602199
ENSMUSG00000037573	534.676	0.312408	0.108485	2.87973	0.00398013	0.0463338	Tob1	11	94102280	94106321	1	transducer of ErbB-2.1 [Source:MGI Symbol;Acc:MGI:1349721]	0.06033
ENSMUSG00000027499	2490.62	-0.185653	0.0644868	-2.87893	0.00399032	0.0464181	Pkia	3	7431729	7510426	1	protein kinase inhibitor, alpha [Source:MGI Symbol;Acc:MGI:104747]	0.0604409
ENSMUSG00000035585	1712.58	-0.235127	0.0816852	-2.87845	0.00399631	0.0464361	Tsen34	7	3695862	3704023	1	tRNA splicing endonuclease subunit 34 [Source:MGI Symbol;Acc:MGI:1913328]	0.0604667
ENSMUSG00000040250	385.093	0.473884	0.164638	2.87834	0.00399778	0.0464361	Ints13	6	146451130	146479333	-1	integrator complex subunit 13 [Source:MGI Symbol;Acc:MGI:1918427]	0.0604667
ENSMUSG00000070527	16.5992	1.51074	0.525233	2.87633	0.00402324	0.0466974	Mkrn3	7	62067341	62069887	-1	makorin, ring finger protein, 3 [Source:MGI Symbol;Acc:MGI:2181178]	0.0608081
ENSMUSG00000017978	1413.79	-0.216876	0.0754142	-2.87579	0.00403016	0.0467433	Cadps2	6	23262772	23839420	-1	Ca2+-dependent activator protein for secretion 2 [Source:MGI Symbol;Acc:MGI:2443963]	0.060869
ENSMUSG00000012405	3699.68	-0.217015	0.075481	-2.87509	0.00403908	0.0468122	Rpl15	14	4198305	4201873	1	ribosomal protein L15 [Source:MGI Symbol;Acc:MGI:1913730]	0.0609599
ENSMUSG00000038690	2854.19	-0.290958	0.101218	-2.87456	0.00404586	0.0468271	Atp5j2	5	145120508	145128872	-1	ATP synthase, H+ transporting, mitochondrial F0 complex, subunit F2 [Source:MGI Symbol;Acc:MGI:1927558]	0.0609815
ENSMUSG00000063317	5432.11	-0.134265	0.0467084	-2.87453	0.00404631	0.0468271	Usp31	7	121241244	121306476	-1	ubiquitin specific peptidase 31 [Source:MGI Symbol;Acc:MGI:1923429]	0.0609815
ENSMUSG00000030647	1840.83	-0.191829	0.0667626	-2.8733	0.00406207	0.0469305	Ndufc2	7	97049210	97057009	1	NADH:ubiquinone oxidoreductase subunit C2 [Source:MGI Symbol;Acc:MGI:1344370]	0.0611198
ENSMUSG00000038495	1935.65	0.191573	0.0666768	2.87316	0.00406383	0.0469305	Otud7b	3	96011839	96068446	1	OTU domain containing 7B [Source:MGI Symbol;Acc:MGI:2654703]	0.0611198
ENSMUSG00000021725	866.087	0.240353	0.0836552	2.87314	0.00406419	0.0469305	Parp8	13	116991356	117162073	-1	poly (ADP-ribose) polymerase family, member 8 [Source:MGI Symbol;Acc:MGI:1098713]	0.0611198
ENSMUSG00000025728	2644.57	0.177807	0.061892	2.87287	0.00406766	0.0469362	Pigq	17	26145395	26163910	-1	phosphatidylinositol glycan anchor biosynthesis, class Q [Source:MGI Symbol;Acc:MGI:1333114]	0.0611283
ENSMUSG00000025651	7750.81	-0.159876	0.0556554	-2.8726	0.00407111	0.0469415	Uqcrc1	9	108765701	108778691	1	ubiquinol-cytochrome c reductase core protein 1 [Source:MGI Symbol;Acc:MGI:107876]	0.0611363
ENSMUSG00000022550	222.41	0.445491	0.15511	2.87211	0.00407743	0.0469631	Adck5	15	76460558	76480016	1	aarF domain containing kinase 5 [Source:MGI Symbol;Acc:MGI:2679274]	0.0611668
ENSMUSG00000031532	5422.01	-0.125219	0.0436001	-2.87199	0.00407895	0.0469631	Saraf	8	34621717	34637999	1	store-operated calcium entry-associated regulatory factor [Source:MGI Symbol;Acc:MGI:1915137]	0.0611668
ENSMUSG00000026860	6033.31	0.149046	0.0519133	2.87106	0.00409098	0.0470486	Sh3glb2	2	30234821	30249349	-1	SH3-domain GRB2-like endophilin B2 [Source:MGI Symbol;Acc:MGI:2385131]	0.0612804
ENSMUSG00000075000	1019.34	-0.208652	0.0726767	-2.87095	0.00409235	0.0470486	Nrbf2	10	67102468	67121084	-1	nuclear receptor binding factor 2 [Source:MGI Symbol;Acc:MGI:1354950]	0.0612804
ENSMUSG00000021877	2370.1	-0.169666	0.0591094	-2.87037	0.00409991	0.0471011	Arf4	14	26359229	26386239	1	ADP-ribosylation factor 4 [Source:MGI Symbol;Acc:MGI:99433]	0.0613499
ENSMUSG00000030795	3463.76	0.217923	0.0759306	2.87004	0.00410425	0.0471166	Fus	7	127566629	127584873	1	fused in sarcoma [Source:MGI Symbol;Acc:MGI:1353633]	0.0613713
ENSMUSG00000068040	1481.35	0.353984	0.123351	2.86973	0.00410826	0.0471282	Tm9sf4	2	153003223	153052386	1	transmembrane 9 superfamily member 4 [Source:MGI Symbol;Acc:MGI:2139220]	0.0613876
ENSMUSG00000106841	14.9705	1.67797	0.584801	2.86931	0.00411372	0.0471564	Gm42656	5	121108106	121110410	-1	predicted gene 42656 [Source:MGI Symbol;Acc:MGI:5662793]	0.0614255
ENSMUSG00000045252	462.801	0.276929	0.0965468	2.86834	0.00412637	0.047267	Zfp574	7	24771992	24782917	1	zinc finger protein 574 [Source:MGI Symbol;Acc:MGI:2442951]	0.0615707
ENSMUSG00000035268	399.737	-0.35341	0.123251	-2.86739	0.0041387	0.0473738	Pkig	2	163500306	163568078	1	protein kinase inhibitor, gamma [Source:MGI Symbol;Acc:MGI:1343086]	0.0617109
ENSMUSG00000067149	27.6758	-1.77127	0.618191	-2.86525	0.00416679	0.0476325	Jchain	5	88667668	88675750	-1	immunoglobulin joining chain [Source:MGI Symbol;Acc:MGI:96493]	0.0620502
ENSMUSG00000031633	23542	-0.169411	0.0591269	-2.86521	0.00416736	0.0476325	Slc25a4	8	46659834	46664321	-1	solute carrier family 25 (mitochondrial carrier, adenine nucleotide translocator), member 4 [Source:MGI Symbol;Acc:MGI:1353495]	0.0620502
ENSMUSG00000060671	3653.34	0.173049	0.0604303	2.86362	0.00418836	0.0478127	Atp8b2	3	89846788	89870815	-1	ATPase, class I, type 8B, member 2 [Source:MGI Symbol;Acc:MGI:1859660]	0.0622872
ENSMUSG00000026171	568.874	0.289717	0.101174	2.86355	0.00418919	0.0478127	Rnf25	1	74632907	74640556	-1	ring finger protein 25 [Source:MGI Symbol;Acc:MGI:1890215]	0.0622872
ENSMUSG00000033585	4128.33	-0.192823	0.0673576	-2.86268	0.00420078	0.0478811	Ndn	7	61996317	62000010	1	necdin, MAGE family member [Source:MGI Symbol;Acc:MGI:97290]	0.0623786
ENSMUSG00000032235	189.232	0.513221	0.179282	2.86264	0.00420127	0.0478811	Ice2	9	69305188	69340404	1	interactor of little elongation complex ELL subunit 2 [Source:MGI Symbol;Acc:MGI:2135947]	0.0623786
ENSMUSG00000028456	624.051	0.385773	0.134839	2.86098	0.00422329	0.0480972	Unc13b	4	43058953	43264871	1	unc-13 homolog B [Source:MGI Symbol;Acc:MGI:1342278]	0.0626613
ENSMUSG00000019795	8080.23	-0.121522	0.0425263	-2.85758	0.00426886	0.0485634	Pcmt1	10	7505137	7556900	-1	protein-L-isoaspartate (D-aspartate) O-methyltransferase 1 [Source:MGI Symbol;Acc:MGI:97502]	0.063271
ENSMUSG00000071644	7818.33	-0.131276	0.0459415	-2.85747	0.00427039	0.0485634	Eef1g	19	8944405	8955843	1	eukaryotic translation elongation factor 1 gamma [Source:MGI Symbol;Acc:MGI:1914410]	0.063271
ENSMUSG00000029442	48.0744	1.08848	0.380971	2.85714	0.00427483	0.0485788	Wdr66	5	123390165	123465547	1	WD repeat domain 66 [Source:MGI Symbol;Acc:MGI:1918495]	0.0632922
ENSMUSG00000038213	422.558	-0.325006	0.113849	-2.85471	0.00430758	0.0489114	Tapbpl	6	125200896	125208823	-1	TAP binding protein-like [Source:MGI Symbol;Acc:MGI:2384853]	0.0637279
ENSMUSG00000027109	906.494	0.214651	0.0751973	2.85451	0.00431032	0.0489114	Sp3	2	72766771	72810790	-1	trans-acting transcription factor 3 [Source:MGI Symbol;Acc:MGI:1277166]	0.0637279
ENSMUSG00000056763	264.418	0.514573	0.18034	2.85334	0.00432618	0.049056	Cspp1	1	10108212	10206993	1	centrosome and spindle pole associated protein 1 [Source:MGI Symbol;Acc:MGI:2681832]	0.0639175
ENSMUSG00000030281	210.971	-0.428259	0.150323	-2.84892	0.00438683	0.0496739	Il17rc	6	113448388	113460101	1	interleukin 17 receptor C [Source:MGI Symbol;Acc:MGI:2159336]	0.0647249
ENSMUSG00000022490	650.064	-0.379711	0.133283	-2.84891	0.00438698	0.0496739	Ppp1r1a	15	103438706	103446430	-1	protein phosphatase 1, regulatory inhibitor subunit 1A [Source:MGI Symbol;Acc:MGI:1889595]	0.0647249
ENSMUSG00000025869	526.638	-0.265803	0.0933979	-2.84592	0.00442834	0.0501061	Nop16	13	54731998	54737903	-1	NOP16 nucleolar protein [Source:MGI Symbol;Acc:MGI:107862]	0.0652893
ENSMUSG00000109321	89.0194	0.617585	0.217124	2.84439	0.00444959	0.0503105	A330076H08Rik	7	61579885	61632106	-1	RIKEN cDNA A330076H08 gene [Source:MGI Symbol;Acc:MGI:2443193]	0.0655567
ENSMUSG00000026238	5239.53	-0.184007	0.0647047	-2.8438	0.00445786	0.0503491	Ptma	1	86454448	86458434	1	prothymosin alpha [Source:MGI Symbol;Acc:MGI:97803]	0.0656094
ENSMUSG00000031068	3858.38	-0.19922	0.0700568	-2.84369	0.00445941	0.0503491	Glrx3	7	137039343	137070323	1	glutaredoxin 3 [Source:MGI Symbol;Acc:MGI:1353653]	0.0656094
ENSMUSG00000008036	3903.31	-0.162934	0.0573063	-2.84322	0.00446606	0.050388	Ap2s1	7	16472335	16483219	1	adaptor-related protein complex 2, sigma 1 subunit [Source:MGI Symbol;Acc:MGI:2141861]	0.0656614
ENSMUSG00000027593	5096.15	-0.154877	0.0545297	-2.84023	0.00450814	0.0508263	Raly	2	154633016	154709181	1	hnRNP-associated with lethal yellow [Source:MGI Symbol;Acc:MGI:97850]	0.0662337
ENSMUSG00000043943	21.6029	1.52697	0.537709	2.83977	0.00451457	0.0508624	Naalad2	9	18233247	18314291	-1	N-acetylated alpha-linked acidic dipeptidase 2 [Source:MGI Symbol;Acc:MGI:1919810]	0.066282
ENSMUSG00000029364	5226.88	-0.138381	0.0487405	-2.83913	0.0045236	0.0508951	Wsb2	5	117495369	117516666	1	WD repeat and SOCS box-containing 2 [Source:MGI Symbol;Acc:MGI:2144041]	0.066327
ENSMUSG00000039990	453.735	0.346549	0.122063	2.83911	0.00452394	0.0508951	Edrf1	7	133239272	133274700	1	erythroid differentiation regulatory factor 1 [Source:MGI Symbol;Acc:MGI:1919831]	0.066327
ENSMUSG00000019362	1309.29	-0.206479	0.0727445	-2.83841	0.00453387	0.0509704	D8Ertd738e	8	84972867	84976348	-1	DNA segment, Chr 8, ERATO Doi 738, expressed [Source:MGI Symbol;Acc:MGI:1289231]	0.0664262
ENSMUSG00000063457	3447.42	-0.240718	0.0848307	-2.83762	0.00454509	0.0510581	Rps15	10	80128287	80129948	1	ribosomal protein S15 [Source:MGI Symbol;Acc:MGI:98117]	0.0664728
ENSMUSG00000024483	1329.79	0.222215	0.0783164	2.83741	0.00454816	0.0510581	Ankhd1	18	36693040	36791966	1	ankyrin repeat and KH domain containing 1 [Source:MGI Symbol;Acc:MGI:1921733]	0.0664728
ENSMUSG00000116145	5.5525	3.24466	1.14357	2.83732	0.00454945	NA	5730521K06Rik	15	76474320	76475927	1	RIKEN cDNA 5730521K06 gene [Source:MGI Symbol;Acc:MGI:1917889]	0.0664728
ENSMUSG00000085123	4.4306	3.85633	1.35915	2.8373	0.00454969	NA	Rubie	14	46805720	46835882	-1	RNA upstream of Bmp4 expressed in inner ear [Source:MGI Symbol;Acc:MGI:5568573]	0.0664728
ENSMUSG00000043068	866.16	-0.349145	0.123113	-2.83598	0.0045685	0.0512499	Fam89a	8	125466996	125478571	-1	family with sequence similarity 89, member A [Source:MGI Symbol;Acc:MGI:1916877]	0.0667013
ENSMUSG00000043843	288.591	0.436605	0.154005	2.83501	0.00458249	0.0513644	Tmem145	7	25005531	25015620	1	transmembrane protein 145 [Source:MGI Symbol;Acc:MGI:3607779]	0.0668529
ENSMUSG00000074652	112.945	0.797469	0.281313	2.83481	0.00458524	0.0513644	Myh7b	2	155453132	155476227	1	myosin, heavy chain 7B, cardiac muscle, beta [Source:MGI Symbol;Acc:MGI:3710243]	0.0668529
ENSMUSG00000032702	986.179	0.34287	0.121046	2.83255	0.00461783	0.0516928	Kank1	19	25214339	25411860	1	KN motif and ankyrin repeat domains 1 [Source:MGI Symbol;Acc:MGI:2147707]	0.0672816
ENSMUSG00000026959	5172.88	0.173279	0.0611841	2.83209	0.00462444	0.0517221	Grin1	2	25181193	25209199	-1	glutamate receptor, ionotropic, NMDA1 (zeta 1) [Source:MGI Symbol;Acc:MGI:95819]	0.0673223
ENSMUSG00000040687	5182.07	0.161565	0.0570517	2.83191	0.00462702	0.0517221	Madd	2	90967705	91014182	-1	MAP-kinase activating death domain [Source:MGI Symbol;Acc:MGI:2444672]	0.0673223
ENSMUSG00000024256	2119.23	-0.300933	0.106317	-2.83053	0.00464706	0.0519092	Adcyap1	17	93506445	93513965	1	adenylate cyclase activating polypeptide 1 [Source:MGI Symbol;Acc:MGI:105094]	0.067567
ENSMUSG00000034667	2171.56	-0.287797	0.101706	-2.8297	0.00465923	0.0519822	Xpot	10	121423285	121462237	-1	exportin, tRNA (nuclear export receptor for tRNAs) [Source:MGI Symbol;Acc:MGI:1920442]	0.0676645
ENSMUSG00000025534	429.069	-0.295214	0.104329	-2.82963	0.0046602	0.0519822	Gusb	5	130017852	130031890	-1	glucuronidase, beta [Source:MGI Symbol;Acc:MGI:95872]	0.0676645
ENSMUSG00000015087	3435.13	0.180261	0.0637238	2.82878	0.00467257	0.0520466	Rabl6	2	25473030	25498533	-1	RAB, member RAS oncogene family-like 6 [Source:MGI Symbol;Acc:MGI:2442633]	0.0677515
ENSMUSG00000025858	1460.04	-0.173436	0.0613115	-2.82877	0.00467268	0.0520466	Get4	5	139238079	139255806	1	golgi to ER traffic protein 4 [Source:MGI Symbol;Acc:MGI:1914854]	0.0677515
ENSMUSG00000037190	573.081	-0.259677	0.0918056	-2.82855	0.00467589	0.0520466	Cyb561d2	9	107416206	107419392	-1	cytochrome b-561 domain containing 2 [Source:MGI Symbol;Acc:MGI:1929280]	0.0677515
ENSMUSG00000053950	662.458	0.257944	0.091202	2.82827	0.00468003	0.0520559	Adnp2	18	80169526	80194697	-1	ADNP homeobox 2 [Source:MGI Symbol;Acc:MGI:2448562]	0.0677515
ENSMUSG00000040236	806.561	-0.224108	0.0792454	-2.82803	0.00468355	0.0520571	Trappc5	8	3726299	3731255	1	trafficking protein particle complex 5 [Source:MGI Symbol;Acc:MGI:1913932]	0.0677515
ENSMUSG00000059291	3417.72	-0.250179	0.0884708	-2.82781	0.00468676	0.0520571	Rpl11	4	135755576	135780739	-1	ribosomal protein L11 [Source:MGI Symbol;Acc:MGI:1914275]	0.0677515
ENSMUSG00000021091	6277.37	-0.226685	0.0801725	-2.82747	0.00469176	0.0520759	Serpina3n	12	104372988	104380588	1	serine (or cysteine) peptidase inhibitor, clade A, member 3N [Source:MGI Symbol;Acc:MGI:105045]	0.0677515
ENSMUSG00000112237	9.93216	2.2263	0.787386	2.82746	0.00469195	NA	D630033A02Rik	10	122820979	122822460	-1	RIKEN cDNA D630033A02 gene [Source:MGI Symbol;Acc:MGI:3028060]	0.0677515
ENSMUSG00000078941	1381.18	-0.189788	0.0671482	-2.82641	0.00470735	0.0522121	Ak6	13	100787487	100802867	1	adenylate kinase 6 [Source:MGI Symbol;Acc:MGI:5510732]	0.0679273
ENSMUSG00000074629	5.60472	3.22972	1.14286	2.82599	0.00471344	NA	4930518I15Rik	2	156698536	156700132	-1	RIKEN cDNA 4930518I15 gene [Source:MGI Symbol;Acc:MGI:1921954]	0.0679335
ENSMUSG00000049728	313.462	0.338391	0.119745	2.82594	0.00471424	0.0522517	Zfp668	7	127462219	127476000	-1	zinc finger protein 668 [Source:MGI Symbol;Acc:MGI:2442943]	0.0679335
ENSMUSG00000025781	3911.19	-0.185015	0.0654834	-2.82538	0.00472251	0.0523034	Atp5c1	2	10060827	10085321	-1	ATP synthase, H+ transporting, mitochondrial F1 complex, gamma polypeptide 1 [Source:MGI Symbol;Acc:MGI:1261437]	0.0680033
ENSMUSG00000038462	2923.87	-0.186603	0.06605	-2.82517	0.00472555	0.0523034	Uqcrfs1	13	30724291	30729345	-1	ubiquinol-cytochrome c reductase, Rieske iron-sulfur polypeptide 1 [Source:MGI Symbol;Acc:MGI:1913944]	0.0680033
ENSMUSG00000055531	1649.22	0.179344	0.0635161	2.8236	0.00474879	0.0525124	Cpsf6	10	117180578	117215920	-1	cleavage and polyadenylation specific factor 6 [Source:MGI Symbol;Acc:MGI:1913948]	0.0682777
ENSMUSG00000053046	4269.93	0.16805	0.0595197	2.82344	0.00475111	0.0525124	Brsk2	7	141503488	141557984	1	BR serine/threonine kinase 2 [Source:MGI Symbol;Acc:MGI:1923020]	0.0682777
ENSMUSG00000013787	2132.06	0.220426	0.0780983	2.82241	0.00476635	0.0526439	Ehmt2	17	35117445	35133028	1	euchromatic histone lysine N-methyltransferase 2 [Source:MGI Symbol;Acc:MGI:2148922]	0.06845
ENSMUSG00000028693	273.355	0.390078	0.138226	2.82202	0.00477221	0.0526717	Nasp	4	116458249	116485138	-1	nuclear autoantigenic sperm protein (histone-binding) [Source:MGI Symbol;Acc:MGI:1355328]	0.0684874
ENSMUSG00000079641	1236.84	-0.369297	0.130923	-2.82073	0.00479148	0.0528473	Rpl39	X	36346173	36349055	-1	ribosomal protein L39 [Source:MGI Symbol;Acc:MGI:1914498]	0.0687171
ENSMUSG00000019960	669.176	0.394171	0.139831	2.8189	0.00481886	0.0530855	Dusp6	10	99099093	99103351	1	dual specificity phosphatase 6 [Source:MGI Symbol;Acc:MGI:1914853]	0.0690294
ENSMUSG00000020219	1672.2	-0.232185	0.082369	-2.81884	0.00481982	0.0530855	Timm13	10	80735284	80736803	-1	translocase of inner mitochondrial membrane 13 [Source:MGI Symbol;Acc:MGI:1353432]	0.0690294
ENSMUSG00000026003	4118.52	-0.142439	0.0505356	-2.81858	0.0048236	0.0530899	Acadl	1	66869998	66902436	-1	acyl-Coenzyme A dehydrogenase, long-chain [Source:MGI Symbol;Acc:MGI:87866]	0.0690365
ENSMUSG00000102143	5.70574	3.31815	1.17757	2.8178	0.00483538	NA	Gm38057	9	71759283	71762485	-1	predicted gene, 38057 [Source:MGI Symbol;Acc:MGI:5611285]	0.0691581
ENSMUSG00000027676	164.732	0.754363	0.26774	2.81752	0.00483959	0.0532287	Ccdc39	3	33866511	33898459	-1	coiled-coil domain containing 39 [Source:MGI Symbol;Acc:MGI:1289263]	0.0691712
ENSMUSG00000104951	6.45303	2.64537	0.939484	2.81576	0.00486614	NA	Gm43413	5	123248759	123250324	1	predicted gene 43413 [Source:MGI Symbol;Acc:MGI:5663550]	0.069493
ENSMUSG00000060206	1132.98	0.244989	0.0870115	2.81559	0.00486871	0.0535116	Zfp462	4	54945048	55083563	1	zinc finger protein 462 [Source:MGI Symbol;Acc:MGI:107690]	0.069493
ENSMUSG00000030270	176.687	0.462808	0.16443	2.81463	0.0048834	0.0536356	Cpne9	6	113259268	113282588	1	copine family member IX [Source:MGI Symbol;Acc:MGI:2443052]	0.0696555
ENSMUSG00000019726	1920.25	-0.271175	0.0963601	-2.81418	0.00489019	0.053652	Lyst	13	13764982	13953388	1	lysosomal trafficking regulator [Source:MGI Symbol;Acc:MGI:107448]	0.0696795
ENSMUSG00000050796	199.124	-0.408405	0.145129	-2.81408	0.00489171	0.053652	B3galt6	4	156073923	156077106	-1	UDP-Gal:betaGal beta 1,3-galactosyltransferase, polypeptide 6 [Source:MGI Symbol;Acc:MGI:2152819]	0.0696795
ENSMUSG00000045179	49.1585	-0.761442	0.270686	-2.81301	0.00490798	0.0537766	Sox3	X	59934972	59937036	-1	SRY (sex determining region Y)-box 3 [Source:MGI Symbol;Acc:MGI:98365]	0.0698442
ENSMUSG00000018822	5711.94	-0.242205	0.0861056	-2.81289	0.00490991	0.0537766	Sfrp5	19	42186410	42190691	-1	secreted frizzled-related sequence protein 5 [Source:MGI Symbol;Acc:MGI:1860298]	0.0698442
ENSMUSG00000035754	1546.09	-0.209324	0.0744284	-2.81242	0.00491707	0.053815	Wdr18	10	79795986	79806037	1	WD repeat domain 18 [Source:MGI Symbol;Acc:MGI:2158400]	0.0698988
ENSMUSG00000004100	270.246	0.348351	0.123882	2.81195	0.00492419	0.053815	Ppan	9	20799471	20803474	1	peter pan homolog [Source:MGI Symbol;Acc:MGI:2178445]	0.0699009
ENSMUSG00000028780	465.164	-0.327617	0.11652	-2.81168	0.00492833	0.053815	Sema3c	5	17779279	17935266	1	sema domain, immunoglobulin domain (Ig), short basic domain, secreted, (semaphorin) 3C [Source:MGI Symbol;Acc:MGI:107557]	0.0699009
ENSMUSG00000027667	500.194	0.298768	0.106261	2.81166	0.0049287	0.053815	Zfp639	3	32564408	32574982	1	zinc finger protein 639 [Source:MGI Symbol;Acc:MGI:1915028]	0.0699009
ENSMUSG00000031842	143.275	0.662206	0.235531	2.81154	0.00493051	0.053815	Pde4c	8	71176369	71203835	1	phosphodiesterase 4C, cAMP specific [Source:MGI Symbol;Acc:MGI:99556]	0.0699009
ENSMUSG00000027580	140.668	0.641089	0.228076	2.81085	0.00494102	0.0538924	Helz2	2	180869408	180883820	-1	helicase with zinc finger 2, transcriptional coactivator [Source:MGI Symbol;Acc:MGI:2385169]	0.0700028
ENSMUSG00000073147	232.437	0.458981	0.163318	2.81035	0.00494884	0.0539105	5031425E22Rik	5	23587306	23639267	-1	RIKEN cDNA 5031425E22 gene [Source:MGI Symbol;Acc:MGI:1923227]	0.070029
ENSMUSG00000022555	392.268	0.358595	0.1276	2.8103	0.00494953	0.0539105	Dgat1	15	76386215	76396153	-1	diacylglycerol O-acyltransferase 1 [Source:MGI Symbol;Acc:MGI:1333825]	0.070029
ENSMUSG00000026424	2267.12	-0.223873	0.0796754	-2.80981	0.00495704	0.0539549	Gpr37l1	1	135087972	135095419	-1	G protein-coupled receptor 37-like 1 [Source:MGI Symbol;Acc:MGI:1928503]	0.0700881
ENSMUSG00000028430	2359.92	0.173722	0.0618415	2.80914	0.00496736	0.0540034	Nol6	4	41114427	41124455	-1	nucleolar protein family 6 (RNA-associated) [Source:MGI Symbol;Acc:MGI:2140151]	0.0701539
ENSMUSG00000029765	4925.69	-0.171803	0.06116	-2.80908	0.00496836	0.0540034	Plxna4	6	32121203	32565127	-1	plexin A4 [Source:MGI Symbol;Acc:MGI:2179061]	0.0701539
ENSMUSG00000079610	348.988	-0.384831	0.137019	-2.80859	0.00497587	0.0540338	Ankrd39	1	36576588	36586526	-1	ankyrin repeat domain 39 [Source:MGI Symbol;Acc:MGI:1914816]	0.070186
ENSMUSG00000024479	2865.04	-0.245655	0.0874758	-2.80826	0.00498101	0.0540338	Mal2	15	54434588	54466243	1	mal, T cell differentiation protein 2 [Source:MGI Symbol;Acc:MGI:2146021]	0.070186
ENSMUSG00000102917	17.9861	1.30227	0.463733	2.80823	0.00498145	0.0540338	Gm37724	1	33104211	33105431	1	predicted gene, 37724 [Source:MGI Symbol;Acc:MGI:5610952]	0.070186
ENSMUSG00000030724	4.64859	4.48134	1.59588	2.80807	0.00498398	NA	Cd19	7	126007622	126014061	-1	CD19 antigen [Source:MGI Symbol;Acc:MGI:88319]	0.070186
ENSMUSG00000045053	101.534	-0.559047	0.199194	-2.80654	0.00500762	0.0542803	Kcng3	17	83893386	83939324	-1	potassium voltage-gated channel, subfamily G, member 3 [Source:MGI Symbol;Acc:MGI:2663923]	0.0704718
ENSMUSG00000033813	1964.78	-0.20013	0.0713268	-2.80582	0.00501889	0.054365	Tcea1	1	4928037	4968132	1	transcription elongation factor A (SII) 1 [Source:MGI Symbol;Acc:MGI:1196624]	0.0705832
ENSMUSG00000053253	8383.3	-0.128875	0.0459433	-2.80508	0.00503038	0.0544519	Ndfip2	14	105496008	105546732	1	Nedd4 family interacting protein 2 [Source:MGI Symbol;Acc:MGI:1923523]	0.0706974
ENSMUSG00000002580	1729.13	-0.25186	0.0898055	-2.80451	0.00503935	0.0545058	Mien1	11	98328534	98329817	-1	migration and invasion enhancer 1 [Source:MGI Symbol;Acc:MGI:1913678]	0.070773
ENSMUSG00000002233	1191.55	-0.259073	0.0923857	-2.80425	0.0050434	0.0545058	Rhoc	3	104695691	104701775	1	ras homolog family member C [Source:MGI Symbol;Acc:MGI:106028]	0.070773
ENSMUSG00000032502	1497.26	-0.322868	0.115144	-2.80404	0.00504668	0.0545058	Stac	9	111390505	111519416	-1	src homology three (SH3) and cysteine rich domain [Source:MGI Symbol;Acc:MGI:1201400]	0.070773
ENSMUSG00000030663	2248.34	-0.224108	0.0799278	-2.80388	0.0050492	0.0545058	1110004F10Rik	7	115638632	115704445	1	RIKEN cDNA 1110004F10 gene [Source:MGI Symbol;Acc:MGI:1929274]	0.070773
ENSMUSG00000038611	1281.08	0.279679	0.0997885	2.80272	0.00506738	0.0546283	Phrf1	7	140808697	140842663	1	PHD and ring finger domains 1 [Source:MGI Symbol;Acc:MGI:2141847]	0.0709349
ENSMUSG00000026657	2003.68	0.200194	0.0714286	2.80271	0.0050675	0.0546283	Frmd4a	2	4022528	4618854	1	FERM domain containing 4A [Source:MGI Symbol;Acc:MGI:1919850]	0.0709349
ENSMUSG00000068267	3578.46	-0.145808	0.052059	-2.80082	0.00509727	0.0549116	Cenpb	2	131017102	131021987	-1	centromere protein B [Source:MGI Symbol;Acc:MGI:88376]	0.0713042
ENSMUSG00000039246	190.628	-0.415026	0.148222	-2.80002	0.0051099	0.05501	Lyplal1	1	185819928	185849507	-1	lysophospholipase-like 1 [Source:MGI Symbol;Acc:MGI:2385115]	0.0714333
ENSMUSG00000017765	644.813	0.309935	0.110711	2.79949	0.00511838	0.0550638	Slc12a4	8	106670222	106692729	-1	solute carrier family 12, member 4 [Source:MGI Symbol;Acc:MGI:1309465]	0.0715045
ENSMUSG00000032527	1625.01	-0.180286	0.0644216	-2.79853	0.00513356	0.0551893	Pccb	9	100864085	100916951	-1	propionyl Coenzyme A carboxylase, beta polypeptide [Source:MGI Symbol;Acc:MGI:1914154]	0.0716689
ENSMUSG00000028047	154.2	1.846	0.659788	2.79787	0.00514403	0.0552641	Thbs3	3	89122487	89134144	1	thrombospondin 3 [Source:MGI Symbol;Acc:MGI:98739]	0.0717675
ENSMUSG00000021009	467.202	0.329747	0.117978	2.795	0.00518995	0.0557194	Ptpn21	12	98643000	98703664	-1	protein tyrosine phosphatase, non-receptor type 21 [Source:MGI Symbol;Acc:MGI:1344406]	0.0723601
ENSMUSG00000069917	1167.72	2.07589	0.742854	2.79449	0.00519824	0.0557599	Hba-a2	11	32246489	32247298	1	hemoglobin alpha, adult chain 2 [Source:MGI Symbol;Acc:MGI:96016]	0.0724155
ENSMUSG00000003429	2796.18	-0.280997	0.10056	-2.79433	0.00520081	0.0557599	Rps11	7	44771803	44773863	-1	ribosomal protein S11 [Source:MGI Symbol;Acc:MGI:1351329]	0.0724155
ENSMUSG00000020288	1447.89	0.256872	0.0919383	2.79396	0.00520671	0.0557852	Ahsa2	11	23437882	23448030	-1	AHA1, activator of heat shock protein ATPase 2 [Source:MGI Symbol;Acc:MGI:1916133]	0.0724498
ENSMUSG00000055322	14650.5	0.202545	0.0725263	2.79271	0.00522678	0.0559621	Tns1	1	73949390	74163608	-1	tensin 1 [Source:MGI Symbol;Acc:MGI:104552]	0.0726808
ENSMUSG00000047379	2148.61	-0.165751	0.059363	-2.79216	0.00523577	0.0560203	B4gat1	19	5088854	5091159	1	beta-1,4-glucuronyltransferase 1 [Source:MGI Symbol;Acc:MGI:1919680]	0.0727579
ENSMUSG00000025321	3782.15	-0.260747	0.0934108	-2.7914	0.00524813	0.0560776	Itgb8	12	119121757	119202537	-1	integrin beta 8 [Source:MGI Symbol;Acc:MGI:1338035]	0.0728351
ENSMUSG00000009863	3165.85	-0.162566	0.0582384	-2.79139	0.00524826	0.0560776	Sdhb	4	140688514	140706504	1	succinate dehydrogenase complex, subunit B, iron sulfur (Ip) [Source:MGI Symbol;Acc:MGI:1914930]	0.0728351
ENSMUSG00000045827	299.871	-0.348688	0.124948	-2.79065	0.00526017	0.0561668	Serpinb9	13	33187233	33201940	1	serine (or cysteine) peptidase inhibitor, clade B, member 9 [Source:MGI Symbol;Acc:MGI:106603]	0.0729524
ENSMUSG00000049739	504.014	0.335543	0.12027	2.78992	0.00527204	0.0562554	Zfp646	7	127475393	127485168	1	zinc finger protein 646 [Source:MGI Symbol;Acc:MGI:3665412]	0.0730688
ENSMUSG00000066640	838.898	0.261609	0.0938138	2.7886	0.0052937	0.0564482	Fbxl18	5	142852701	142881176	-1	F-box and leucine-rich repeat protein 18 [Source:MGI Symbol;Acc:MGI:2444450]	0.0733206
ENSMUSG00000021969	864.967	0.233069	0.0835968	2.78801	0.00530323	0.0565115	Zdhhc20	14	58070160	58127733	-1	zinc finger, DHHC domain containing 20 [Source:MGI Symbol;Acc:MGI:1923215]	0.0734044
ENSMUSG00000010607	262.506	-0.350027	0.125577	-2.78735	0.00531405	0.0565647	Pigyl	9	22068142	22069654	1	phosphatidylinositol glycan anchor biosynthesis, class Y-like [Source:MGI Symbol;Acc:MGI:1913518]	0.073428
ENSMUSG00000098318	6.2097	4.06358	1.4579	2.78729	0.00531506	NA	Lockd	6	134906055	134933761	1	lncRNA downstream of Cdkn1b [Source:MGI Symbol;Acc:MGI:1915081]	0.073428
ENSMUSG00000056917	252.547	0.585946	0.210222	2.78727	0.0053154	0.0565647	Sipa1	19	5701213	5713735	-1	signal-induced proliferation associated gene 1 [Source:MGI Symbol;Acc:MGI:107576]	0.073428
ENSMUSG00000001020	161.627	-0.5536	0.198653	-2.78676	0.00532372	0.0566148	S100a4	3	90511078	90513352	1	S100 calcium binding protein A4 [Source:MGI Symbol;Acc:MGI:1330282]	0.0734945
ENSMUSG00000029513	253.762	0.395356	0.141899	2.78618	0.00533328	0.0566782	Prkab1	5	116151645	116162567	-1	protein kinase, AMP-activated, beta 1 non-catalytic subunit [Source:MGI Symbol;Acc:MGI:1336167]	0.0735473
ENSMUSG00000106408	6.8456	2.83229	1.01672	2.78572	0.00534086	NA	Gm43321	5	48976818	48979226	-1	predicted gene 43321 [Source:MGI Symbol;Acc:MGI:5663458]	0.0735473
ENSMUSG00000078566	5161.46	-0.183631	0.0659189	-2.78571	0.00534107	0.0566882	Bnip3	7	138492565	138511248	-1	BCL2/adenovirus E1B interacting protein 3 [Source:MGI Symbol;Acc:MGI:109326]	0.0735473
ENSMUSG00000033697	2936.73	0.283007	0.101599	2.78552	0.00534427	0.0566882	Arhgap39	15	76608185	76702370	-1	Rho GTPase activating protein 39 [Source:MGI Symbol;Acc:MGI:107858]	0.0735473
ENSMUSG00000048332	894.482	-0.273203	0.0980815	-2.78547	0.00534502	0.0566882	Lhfp	3	52948949	53169100	1	lipoma HMGIC fusion partner [Source:MGI Symbol;Acc:MGI:1920048]	0.0735473
ENSMUSG00000073639	3859.36	-0.174856	0.0627848	-2.785	0.00535277	0.0567322	Rab18	18	6733905	6794429	1	RAB18, member RAS oncogene family [Source:MGI Symbol;Acc:MGI:102790]	0.0736059
ENSMUSG00000020538	2185.49	0.273219	0.0981185	2.78458	0.00535972	0.0567676	Srebf1	11	60089915	60113407	-1	sterol regulatory element binding transcription factor 1 [Source:MGI Symbol;Acc:MGI:107606]	0.0736532
ENSMUSG00000097392	524.313	0.473321	0.170007	2.78412	0.00536727	0.0568093	Thoc2l	5	104656216	104702073	1	THO complex subunit 2-like [Source:MGI Symbol;Acc:MGI:3040669]	0.0737089
ENSMUSG00000026356	1622.18	-0.191681	0.068863	-2.78352	0.00537727	0.0568438	Dars	1	128291444	128345105	-1	aspartyl-tRNA synthetase [Source:MGI Symbol;Acc:MGI:2442544]	0.0737566
ENSMUSG00000025403	607.652	0.305717	0.109832	2.78349	0.00537775	0.0568438	Shmt2	10	127352992	127358313	-1	serine hydroxymethyltransferase 2 (mitochondrial) [Source:MGI Symbol;Acc:MGI:1277989]	0.0737566
ENSMUSG00000025208	968.803	-0.202926	0.0729181	-2.78293	0.00538706	0.056904	Mrpl43	19	44993268	44994881	-1	mitochondrial ribosomal protein L43 [Source:MGI Symbol;Acc:MGI:2137229]	0.0738361
ENSMUSG00000035171	491.099	-0.322551	0.115924	-2.78245	0.00539506	0.0569503	1110059E24Rik	19	21558566	21630340	-1	RIKEN cDNA 1110059E24 gene [Source:MGI Symbol;Acc:MGI:1913456]	0.0738976
ENSMUSG00000026664	1417.23	-0.192898	0.0693334	-2.78218	0.00539956	0.0569596	Phyh	2	4923830	4943541	1	phytanoyl-CoA hydroxylase [Source:MGI Symbol;Acc:MGI:891978]	0.0739111
ENSMUSG00000022722	784.963	-0.230111	0.0827822	-2.77972	0.00544057	0.0573318	Arl6	16	59433312	59459754	-1	ADP-ribosylation factor-like 6 [Source:MGI Symbol;Acc:MGI:1927136]	0.0743971
ENSMUSG00000002266	140.64	0.631296	0.227115	2.77963	0.00544213	0.0573318	Zim1	7	6674268	6699449	-1	zinc finger, imprinted 1 [Source:MGI Symbol;Acc:MGI:1341879]	0.0743971
ENSMUSG00000024258	228.168	-0.40377	0.145337	-2.77816	0.00546683	0.0575535	Polr2d	18	31922212	31929754	1	polymerase (RNA) II (DNA directed) polypeptide D [Source:MGI Symbol;Acc:MGI:1916491]	0.0746861
ENSMUSG00000051817	696.23	0.238223	0.0857707	2.77744	0.00547897	0.0576427	Sox12	2	152235531	152239983	-1	SRY (sex determining region Y)-box 12 [Source:MGI Symbol;Acc:MGI:98360]	0.0748034
ENSMUSG00000068206	1001.69	0.215663	0.077679	2.77633	0.00549764	0.0578005	Pick1	15	79113373	79133684	1	protein interacting with C kinase 1 [Source:MGI Symbol;Acc:MGI:894645]	0.0750096
ENSMUSG00000019877	26706	-0.123576	0.0445378	-2.77463	0.00552639	0.0580639	Serinc1	10	57391870	57408626	-1	serine incorporator 1 [Source:MGI Symbol;Acc:MGI:1926228]	0.075353
ENSMUSG00000065990	1579.24	-0.218185	0.0786601	-2.77378	0.00554097	0.0581478	Aurkaip1	4	155915729	155917587	1	aurora kinase A interacting protein 1 [Source:MGI Symbol;Acc:MGI:1913327]	0.0754648
ENSMUSG00000058656	1443.91	-0.221792	0.0799617	-2.77373	0.00554176	0.0581478	Samd12	15	53317206	53765933	-1	sterile alpha motif domain containing 12 [Source:MGI Symbol;Acc:MGI:2444518]	0.0754648
ENSMUSG00000096929	130.226	0.758697	0.273788	2.77111	0.00558656	0.0585789	A330023F24Rik	1	194658683	194720212	1	RIKEN cDNA A330023F24 gene [Source:MGI Symbol;Acc:MGI:2443958]	0.0760257
ENSMUSG00000036199	1746.5	-0.182003	0.0656974	-2.77032	0.0056001	0.0586817	Ndufa13	8	70346830	70355208	-1	NADH:ubiquinone oxidoreductase subunit A13 [Source:MGI Symbol;Acc:MGI:1914434]	0.0761606
ENSMUSG00000061167	961.886	-0.275702	0.0995286	-2.77008	0.00560429	0.0586866	Rpl15-ps3	9	22096903	22097517	-1	ribosomal protein L15, pseudogene 3 [Source:MGI Symbol;Acc:MGI:3782952]	0.0761685
ENSMUSG00000010110	988.573	0.269732	0.0974353	2.76832	0.00563465	0.0589434	Stx5a	19	8718777	8733433	1	syntaxin 5A [Source:MGI Symbol;Acc:MGI:1928483]	0.0765062
ENSMUSG00000037300	946.798	0.320345	0.115728	2.76808	0.00563878	0.0589434	Ttc13	8	125398071	125448722	-1	tetratricopeptide repeat domain 13 [Source:MGI Symbol;Acc:MGI:2384573]	0.0765062
ENSMUSG00000021737	2738.21	-0.143786	0.0519457	-2.76801	0.00564005	0.0589434	Psmd6	14	8348779	8357589	1	proteasome (prosome, macropain) 26S subunit, non-ATPase, 6 [Source:MGI Symbol;Acc:MGI:1913663]	0.0765062
ENSMUSG00000054256	316.652	0.392549	0.141843	2.76749	0.00564895	0.0589973	Msi1	5	115567658	115593757	1	musashi RNA-binding protein 1 [Source:MGI Symbol;Acc:MGI:107376]	0.0765775
ENSMUSG00000022617	795.068	0.309101	0.1117	2.76725	0.00565322	0.0590027	Chkb	15	89310563	89314111	-1	choline kinase beta [Source:MGI Symbol;Acc:MGI:1328313]	0.0765861
ENSMUSG00000031007	6772.75	-0.172787	0.0624743	-2.76573	0.00567956	0.0592382	Atp6ap2	X	12454040	12483288	1	ATPase, H+ transporting, lysosomal accessory protein 2 [Source:MGI Symbol;Acc:MGI:1917745]	0.0768933
ENSMUSG00000023224	1862.34	-0.239411	0.0865795	-2.76521	0.00568853	0.0592926	Serping1	2	84595731	84605788	-1	serine (or cysteine) peptidase inhibitor, clade G, member 1 [Source:MGI Symbol;Acc:MGI:894696]	0.0769653
ENSMUSG00000063919	434.625	0.349558	0.126426	2.76491	0.00569377	0.059303	Srrm4	5	116577334	116729876	-1	serine/arginine repetitive matrix 4 [Source:MGI Symbol;Acc:MGI:1916205]	0.0769818
ENSMUSG00000026141	124.087	0.545464	0.197294	2.76473	0.00569707	0.059303	Col19a1	1	24300971	24626553	-1	collagen, type XIX, alpha 1 [Source:MGI Symbol;Acc:MGI:1095415]	0.0769818
ENSMUSG00000037235	1400.49	0.194424	0.0703655	2.76306	0.00572631	0.0595414	Mxd4	5	34331227	34345064	-1	Max dimerization protein 4 [Source:MGI Symbol;Acc:MGI:104991]	0.0772942
ENSMUSG00000109598	39.5854	1.03885	0.375989	2.76299	0.00572754	0.0595414	Gm36356	7	135087758	135093044	1	predicted gene, 36356 [Source:MGI Symbol;Acc:MGI:5595515]	0.0772942
ENSMUSG00000026447	163.639	0.493573	0.178682	2.7623	0.00573956	0.05956	Pik3c2b	1	132973405	133036425	1	phosphatidylinositol-4-phosphate 3-kinase catalytic subunit type 2 beta [Source:MGI Symbol;Acc:MGI:2685045]	0.0773272
ENSMUSG00000041375	744.582	0.312276	0.113059	2.76206	0.00574373	0.05956	Ccdc9	7	16007967	16020720	-1	coiled-coil domain containing 9 [Source:MGI Symbol;Acc:MGI:1921443]	0.0773272
ENSMUSG00000028294	151.843	-0.49099	0.177775	-2.76186	0.00574724	0.05956	Cfap206	4	34688559	34730206	-1	cilia and flagella associated protein 206 [Source:MGI Symbol;Acc:MGI:1916579]	0.0773272
ENSMUSG00000028447	3773.29	-0.197346	0.0714571	-2.76175	0.00574931	0.05956	Dctn3	4	41714798	41723170	-1	dynactin 3 [Source:MGI Symbol;Acc:MGI:1859251]	0.0773272
ENSMUSG00000034832	603.07	0.32394	0.117297	2.76171	0.00574995	0.05956	Tet3	6	83339355	83436066	-1	tet methylcytosine dioxygenase 3 [Source:MGI Symbol;Acc:MGI:2446229]	0.0773272
ENSMUSG00000020803	1490.43	-0.17566	0.0636082	-2.76159	0.00575203	0.05956	Txndc17	11	72098373	72100841	1	thioredoxin domain containing 17 [Source:MGI Symbol;Acc:MGI:1289248]	0.0773272
ENSMUSG00000035133	2041.83	-0.202744	0.0734371	-2.76079	0.0057662	0.0596675	Arhgap5	12	52550755	52618758	1	Rho GTPase activating protein 5 [Source:MGI Symbol;Acc:MGI:1332637]	0.0774681
ENSMUSG00000028901	416.705	0.274074	0.0992934	2.76025	0.00577578	0.0597273	Gmeb1	4	131948336	131988913	-1	glucocorticoid modulatory element binding protein 1 [Source:MGI Symbol;Acc:MGI:2135604]	0.0775473
ENSMUSG00000024854	401.842	-0.293648	0.106394	-2.76	0.00578008	0.0597326	Pold4	19	4281953	4283688	1	polymerase (DNA-directed), delta 4 [Source:MGI Symbol;Acc:MGI:1916995]	0.0775556
ENSMUSG00000031166	3265.11	0.152048	0.0550971	2.75963	0.00578664	0.0597515	Wdr13	X	7989540	7999131	-1	WD repeat domain 13 [Source:MGI Symbol;Acc:MGI:1914661]	0.0775831
ENSMUSG00000102976	425.81	0.398437	0.144389	2.75947	0.00578951	0.0597515	Zc3h11a	1	133547600	133589118	-1	zinc finger CCCH type containing 11A [Source:MGI Symbol;Acc:MGI:1917829]	0.0775831
ENSMUSG00000029245	752.499	-0.232069	0.0841424	-2.75805	0.00581477	0.0598999	Epha5	5	84202620	84565241	-1	Eph receptor A5 [Source:MGI Symbol;Acc:MGI:99654]	0.077783
ENSMUSG00000060126	7817.19	-0.211541	0.0767001	-2.75803	0.00581502	0.0598999	Tpt1	14	76082533	76085965	1	tumor protein, translationally-controlled 1 [Source:MGI Symbol;Acc:MGI:104890]	0.077783
ENSMUSG00000024604	534.208	0.287015	0.104068	2.75796	0.00581635	0.0598999	Rbm22	18	60693808	60705882	1	RNA binding motif protein 22 [Source:MGI Symbol;Acc:MGI:1914060]	0.077783
ENSMUSG00000020828	493.431	0.404957	0.146841	2.75779	0.00581928	0.0598999	Pld2	11	70430890	70448936	1	phospholipase D2 [Source:MGI Symbol;Acc:MGI:892877]	0.077783
ENSMUSG00000003062	2142.01	-0.160545	0.0582193	-2.75759	0.00582291	0.0598999	Stard3nl	13	19541846	19579965	-1	STARD3 N-terminal like [Source:MGI Symbol;Acc:MGI:1923455]	0.077783
ENSMUSG00000039357	873.393	-0.206202	0.0747949	-2.7569	0.0058353	0.0599881	Fut11	14	20745036	20751084	1	fucosyltransferase 11 [Source:MGI Symbol;Acc:MGI:1920318]	0.077899
ENSMUSG00000112433	14.1005	1.60392	0.582222	2.75482	0.00587244	0.0603305	Gm30122	10	78084714	78099973	-1	predicted gene, 30122 [Source:MGI Symbol;Acc:MGI:5589281]	0.0783451
ENSMUSG00000056185	1996.18	0.184361	0.0669367	2.75426	0.00588247	0.0603942	Snx32	19	5542263	5560566	-1	sorting nexin 32 [Source:MGI Symbol;Acc:MGI:2444704]	0.0784293
ENSMUSG00000033909	593.612	0.280394	0.101834	2.75343	0.00589743	0.0605082	Usp36	11	118150477	118181070	-1	ubiquitin specific peptidase 36 [Source:MGI Symbol;Acc:MGI:1919594]	0.0785788
ENSMUSG00000115987	2199.46	-0.171297	0.0622518	-2.75168	0.00592897	0.0607852	Vps28	15	76506287	76510286	-1	vacuolar protein sorting 28 [Source:MGI Symbol;Acc:MGI:1914164]	0.0789415
ENSMUSG00000054594	14.7652	1.59117	0.578289	2.75151	0.00593215	0.0607852	Oscar	7	3612812	3619156	-1	osteoclast associated receptor [Source:MGI Symbol;Acc:MGI:2179720]	0.0789415
ENSMUSG00000041459	3310.15	0.132004	0.047982	2.75111	0.00593938	0.0608197	Tardbp	4	148696839	148711476	-1	TAR DNA binding protein [Source:MGI Symbol;Acc:MGI:2387629]	0.0789878
ENSMUSG00000102277	2.36673	4.53339	1.64841	2.75016	0.00595662	NA	A130050O07Rik	1	137854989	137858011	1	RIKEN cDNA A130050O07 gene [Source:MGI Symbol;Acc:MGI:2443458]	0.079167
ENSMUSG00000055447	3487.37	-0.168503	0.0612805	-2.7497	0.00596505	0.0610429	Cd47	16	49620896	49735373	1	CD47 antigen (Rh-related antigen, integrin-associated signal transducer) [Source:MGI Symbol;Acc:MGI:96617]	0.079229
ENSMUSG00000003346	2839.79	-0.149069	0.0542235	-2.74916	0.00597481	0.061103	Abhd17a	10	80419488	80426175	-1	abhydrolase domain containing 17A [Source:MGI Symbol;Acc:MGI:106388]	0.0793085
ENSMUSG00000093674	3963.62	-0.282881	0.102914	-2.74872	0.00598292	0.0611341	Rpl41	10	128383983	128385174	-1	ribosomal protein L41 [Source:MGI Symbol;Acc:MGI:1915195]	0.0793519
ENSMUSG00000024014	453.57	0.282564	0.102804	2.74857	0.00598562	0.0611341	Pim1	17	29709727	29715086	1	proviral integration site 1 [Source:MGI Symbol;Acc:MGI:97584]	0.0793519
ENSMUSG00000036966	5447.72	-0.162668	0.0591898	-2.74825	0.00599139	0.0611533	Spryd3	15	102024963	102044669	-1	SPRY domain containing 3 [Source:MGI Symbol;Acc:MGI:2446175]	0.0793783
ENSMUSG00000032118	11344.5	-0.160486	0.0584023	-2.74793	0.00599727	0.0611737	Fez1	9	36733160	36790220	1	fasciculation and elongation protein zeta 1 (zygin I) [Source:MGI Symbol;Acc:MGI:2670976]	0.0794062
ENSMUSG00000014245	160.617	0.464868	0.169228	2.747	0.0060144	0.0613087	Pigl	11	62349286	62405243	1	phosphatidylinositol glycan anchor biosynthesis, class L [Source:MGI Symbol;Acc:MGI:2681271]	0.079583
ENSMUSG00000015013	627.959	-0.294836	0.107363	-2.74616	0.0060297	0.0614249	Trappc2l	8	123338379	123343399	1	trafficking protein particle complex 2-like [Source:MGI Symbol;Acc:MGI:1916295]	0.0797354
ENSMUSG00000020521	140.092	0.630389	0.229698	2.74442	0.00606174	0.0617113	Rnft1	11	86375483	86389851	1	ring finger protein, transmembrane 1 [Source:MGI Symbol;Acc:MGI:1924142]	0.0801086
ENSMUSG00000049960	396.643	-0.343408	0.125173	-2.74347	0.00607934	0.0618505	Mrps16	14	20439372	20443702	-1	mitochondrial ribosomal protein S16 [Source:MGI Symbol;Acc:MGI:1913492]	0.0802908
ENSMUSG00000028252	998.273	-0.200499	0.0730921	-2.7431	0.00608628	0.0618811	Ccnc	4	21727701	21759922	1	cyclin C [Source:MGI Symbol;Acc:MGI:1858199]	0.080332
ENSMUSG00000040524	875.634	0.205872	0.0750638	2.74262	0.00609508	0.0619306	Zfp609	9	65599673	65734846	-1	zinc finger protein 609 [Source:MGI Symbol;Acc:MGI:2674092]	0.0803977
ENSMUSG00000057113	3193.69	-0.180832	0.0659553	-2.74173	0.00611163	0.0620587	Npm1	11	33102287	33113206	-1	nucleophosmin 1 [Source:MGI Symbol;Acc:MGI:106184]	0.0805655
ENSMUSG00000058076	2138.81	-0.230732	0.0842305	-2.73929	0.00615722	0.0624813	Sdhc	1	170954734	170978172	-1	succinate dehydrogenase complex, subunit C, integral membrane protein [Source:MGI Symbol;Acc:MGI:1913302]	0.0811157
ENSMUSG00000030061	3388.4	-0.143743	0.0524819	-2.7389	0.0061646	0.0625158	Uba3	6	97160631	97182608	-1	ubiquitin-like modifier activating enzyme 3 [Source:MGI Symbol;Acc:MGI:1341217]	0.081162
ENSMUSG00000024158	2403.37	-0.17582	0.0642275	-2.73745	0.00619174	0.0627322	Hagh	17	25059117	25083424	1	hydroxyacyl glutathione hydrolase [Source:MGI Symbol;Acc:MGI:95745]	0.0814474
ENSMUSG00000031584	1955.54	-0.158972	0.0580791	-2.73716	0.00619726	0.0627322	Gsr	8	34142551	34188191	1	glutathione reductase [Source:MGI Symbol;Acc:MGI:95804]	0.0814474
ENSMUSG00000098274	2938.11	-0.195885	0.071566	-2.73712	0.00619789	0.0627322	Rpl24	16	55786638	55791798	1	ribosomal protein L24 [Source:MGI Symbol;Acc:MGI:1915443]	0.0814474
ENSMUSG00000030409	365.958	0.546576	0.199727	2.73661	0.00620751	0.0627892	Dmpk	7	18817774	18827746	1	dystrophia myotonica-protein kinase [Source:MGI Symbol;Acc:MGI:94906]	0.081523
ENSMUSG00000039682	1413.1	-0.181811	0.0664463	-2.7362	0.00621528	0.0628274	Lap3	5	45650716	45670033	1	leucine aminopeptidase 3 [Source:MGI Symbol;Acc:MGI:1914238]	0.0815653
ENSMUSG00000064194	4.94807	-2.67152	0.976422	-2.73603	0.00621848	NA	Zfp936	7	42763653	42841533	1	zinc finger protein 936 [Source:MGI Symbol;Acc:MGI:3642994]	0.0815653
ENSMUSG00000038271	2576.52	0.195756	0.0715674	2.73527	0.00623287	0.0629547	Iffo1	6	125122204	125138745	1	intermediate filament family orphan 1 [Source:MGI Symbol;Acc:MGI:2444516]	0.0816914
ENSMUSG00000036249	518.667	-0.253495	0.0926817	-2.73511	0.00623587	0.0629547	Rbm43	2	51814460	51825175	-1	RNA binding motif protein 43 [Source:MGI Symbol;Acc:MGI:1918934]	0.0816914
ENSMUSG00000115138	4.81643	3.63894	1.3314	2.73316	0.006273	NA	Gm36899	15	27459921	27463535	-1	predicted gene, 36899 [Source:MGI Symbol;Acc:MGI:5596058]	0.0821267
ENSMUSG00000052428	957.133	-0.220063	0.0805416	-2.73229	0.00628953	0.0634204	Tmco1	1	167135947	167161547	1	transmembrane and coiled-coil domains 1 [Source:MGI Symbol;Acc:MGI:1921173]	0.0822477
ENSMUSG00000052812	317.699	0.356903	0.130625	2.73226	0.00629006	0.0634204	Atad2b	12	4967353	5097394	1	ATPase family, AAA domain containing 2B [Source:MGI Symbol;Acc:MGI:2444798]	0.0822477
ENSMUSG00000033327	258.875	0.375035	0.13728	2.73189	0.00629714	0.0634511	Tnxb	17	34879431	34938789	1	tenascin XB [Source:MGI Symbol;Acc:MGI:1932137]	0.0822891
ENSMUSG00000085054	18.3032	1.50874	0.552427	2.73112	0.00631195	0.0635478	Gm15834	1	58544307	58562389	1	predicted gene 15834 [Source:MGI Symbol;Acc:MGI:3802168]	0.0824176
ENSMUSG00000020074	1529.35	0.180286	0.0660154	2.73097	0.00631481	0.0635478	Ccar1	10	62579707	62628065	-1	cell division cycle and apoptosis regulator 1 [Source:MGI Symbol;Acc:MGI:1914750]	0.0824176
ENSMUSG00000020297	4037.63	-0.154392	0.0565488	-2.73024	0.00632892	0.0636491	Nsg2	11	31950463	32009202	1	neuron specific gene family member 2 [Source:MGI Symbol;Acc:MGI:1202070]	0.0825506
ENSMUSG00000002845	171.576	0.645576	0.236522	2.72945	0.00634397	0.0637597	Tmem39a	16	38379060	38412524	1	transmembrane protein 39a [Source:MGI Symbol;Acc:MGI:1915096]	0.0826957
ENSMUSG00000087260	819.707	-0.289431	0.106075	-2.72855	0.00636142	0.0638943	Lamtor5	3	107186174	107191398	1	late endosomal/lysosomal adaptor, MAPK and MTOR activator 5 [Source:MGI Symbol;Acc:MGI:1915826]	0.0828718
ENSMUSG00000029462	2345.27	-0.190829	0.069949	-2.72812	0.00636969	0.0639366	Vps29	5	122492432	122503047	1	VPS29 retromer complex component [Source:MGI Symbol;Acc:MGI:1928344]	0.0829281
ENSMUSG00000002768	1660.16	-0.186542	0.0683956	-2.7274	0.00638354	0.0640348	Mea1	17	46989719	46994037	1	male enhanced antigen 1 [Source:MGI Symbol;Acc:MGI:96957]	0.0830571
ENSMUSG00000026457	5252.81	-0.125514	0.0460339	-2.72654	0.00640018	0.0641608	Adipor1	1	134343116	134361089	1	adiponectin receptor 1 [Source:MGI Symbol;Acc:MGI:1919924]	0.0832221
ENSMUSG00000004043	173.93	0.557067	0.204332	2.72629	0.00640506	0.0641689	Stat5a	11	100750177	100775995	1	signal transducer and activator of transcription 5A [Source:MGI Symbol;Acc:MGI:103036]	0.0832342
ENSMUSG00000039463	1782.77	0.225492	0.082717	2.72606	0.00640951	0.0641726	Slc9a8	2	167263632	167318920	1	solute carrier family 9 (sodium/hydrogen exchanger), member 8 [Source:MGI Symbol;Acc:MGI:1924281]	0.0832405
ENSMUSG00000038530	23932.4	-0.190053	0.0697436	-2.72502	0.00642967	0.0643008	Rgs4	1	169569046	169575211	-1	regulator of G-protein signaling 4 [Source:MGI Symbol;Acc:MGI:108409]	0.08341
ENSMUSG00000040511	347.244	0.405791	0.148915	2.72498	0.00643048	0.0643008	Pvr	7	19637503	19655085	-1	poliovirus receptor [Source:MGI Symbol;Acc:MGI:107741]	0.08341
ENSMUSG00000055839	2915.22	-0.17362	0.0637519	-2.72338	0.00646186	0.0645234	Elob	17	24043712	24048110	-1	elongin B [Source:MGI Symbol;Acc:MGI:1914923]	0.0837035
ENSMUSG00000004567	1642.53	0.197487	0.0725198	2.72322	0.00646495	0.0645234	Mcoln1	8	3550457	3565232	1	mucolipin 1 [Source:MGI Symbol;Acc:MGI:1890498]	0.0837035
ENSMUSG00000024608	3967.36	-0.320233	0.117594	-2.72321	0.00646505	0.0645234	Rps14	18	60880170	60911618	1	ribosomal protein S14 [Source:MGI Symbol;Acc:MGI:98107]	0.0837035
ENSMUSG00000020190	1234.35	0.200737	0.0737215	2.72291	0.00647106	0.0645425	Mknk2	10	80501161	80513946	-1	MAP kinase-interacting serine/threonine kinase 2 [Source:MGI Symbol;Acc:MGI:894279]	0.0837298
ENSMUSG00000028932	4163.84	-0.159429	0.0585606	-2.72246	0.00647977	0.0645617	Psmc2	5	21990281	22008785	1	proteasome (prosome, macropain) 26S subunit, ATPase 2 [Source:MGI Symbol;Acc:MGI:109555]	0.0837578
ENSMUSG00000019951	3957.38	-0.162007	0.0595091	-2.72239	0.00648119	0.0645617	Uhrf1bp1l	10	89580853	89655733	1	UHRF1 (ICBP90) binding protein 1-like [Source:MGI Symbol;Acc:MGI:2442888]	0.0837578
ENSMUSG00000039194	240.05	-0.444224	0.163227	-2.72151	0.00649852	0.0646934	Rlbp1	7	79024618	79036796	-1	retinaldehyde binding protein 1 [Source:MGI Symbol;Acc:MGI:97930]	0.0839303
ENSMUSG00000027071	4716.26	-0.177041	0.0650672	-2.7209	0.0065104	0.0647706	P2rx3	2	84828927	84867806	-1	purinergic receptor P2X, ligand-gated ion channel, 3 [Source:MGI Symbol;Acc:MGI:1097160]	0.084032
ENSMUSG00000079509	450.567	0.355341	0.130625	2.72032	0.00652178	0.0648429	Zfx	X	93118237	93167308	-1	zinc finger protein X-linked [Source:MGI Symbol;Acc:MGI:99211]	0.0841274
ENSMUSG00000007836	2770.32	-0.149873	0.0551078	-2.71963	0.00653551	0.0648881	Hnrnpa0	13	58273693	58276370	-1	heterogeneous nuclear ribonucleoprotein A0 [Source:MGI Symbol;Acc:MGI:1924384]	0.0841908
ENSMUSG00000026078	905.648	-0.205557	0.0755838	-2.71959	0.0065363	0.0648881	Pdcl3	1	39024689	39036319	1	phosducin-like 3 [Source:MGI Symbol;Acc:MGI:1916083]	0.0841908
ENSMUSG00000030276	150.384	0.528901	0.194487	2.71947	0.0065387	0.0648881	Ttll3	6	113366221	113391548	1	tubulin tyrosine ligase-like family, member 3 [Source:MGI Symbol;Acc:MGI:2141418]	0.0841908
ENSMUSG00000026021	1509.34	-0.201907	0.0742522	-2.71921	0.00654387	0.0648985	Sumo1	1	59625717	59709993	-1	small ubiquitin-like modifier 1 [Source:MGI Symbol;Acc:MGI:1197010]	0.0842011
ENSMUSG00000029075	7.73097	2.13064	0.783603	2.71902	0.00654751	NA	Tnfrsf4	4	156098300	156101069	1	tumor necrosis factor receptor superfamily, member 4 [Source:MGI Symbol;Acc:MGI:104512]	0.0842011
ENSMUSG00000056342	4483.63	-0.161371	0.0593605	-2.71848	0.00655818	0.0649995	Usp34	11	23256895	23440560	1	ubiquitin specific peptidase 34 [Source:MGI Symbol;Acc:MGI:109473]	0.0842868
ENSMUSG00000036437	592.639	-0.388949	0.1431	-2.71802	0.0065674	0.0650499	Npy1r	8	67149844	67159444	1	neuropeptide Y receptor Y1 [Source:MGI Symbol;Acc:MGI:104963]	0.0843538
ENSMUSG00000022791	6030.15	0.158602	0.0583599	2.71765	0.00657474	0.0650603	Tnk2	16	32462692	32502311	1	tyrosine kinase, non-receptor, 2 [Source:MGI Symbol;Acc:MGI:1858308]	0.084372
ENSMUSG00000000339	2630.73	-0.178026	0.0655148	-2.71735	0.00658074	0.0650603	Rtca	3	116282612	116301857	-1	RNA 3'-terminal phosphate cyclase [Source:MGI Symbol;Acc:MGI:1913618]	0.084372
ENSMUSG00000086782	20.8624	1.53193	0.563762	2.71734	0.00658085	0.0650603	E130102H24Rik	4	101203728	101213932	-1	RIKEN cDNA E130102H24 gene [Source:MGI Symbol;Acc:MGI:1925116]	0.084372
ENSMUSG00000057375	1024.91	-0.19063	0.0701627	-2.71697	0.00658821	0.0650921	Yipf1	4	107171560	107217020	1	Yip1 domain family, member 1 [Source:MGI Symbol;Acc:MGI:1915532]	0.0843922
ENSMUSG00000107171	5.97645	2.54312	0.93605	2.71686	0.00659045	NA	Gm42572	5	73199120	73202497	-1	predicted gene 42572 [Source:MGI Symbol;Acc:MGI:5662709]	0.0843922
ENSMUSG00000048385	4985.9	0.163149	0.0600615	2.71637	0.0066003	0.0651708	Scrt1	15	76400403	76406699	-1	scratch family zinc finger 1 [Source:MGI Symbol;Acc:MGI:2176606]	0.084467
ENSMUSG00000022476	822.489	-0.238231	0.0877468	-2.71498	0.00662795	0.0654027	Polr3h	15	81772429	81810441	-1	polymerase (RNA) III (DNA directed) polypeptide H [Source:MGI Symbol;Acc:MGI:1926179]	0.0847693
ENSMUSG00000027624	11657.7	0.136144	0.0501537	2.71454	0.00663685	0.0654495	Epb41l1	2	156262829	156385134	1	erythrocyte membrane protein band 4.1 like 1 [Source:MGI Symbol;Acc:MGI:103010]	0.0848315
ENSMUSG00000040339	4632.5	-0.1711	0.0630437	-2.71399	0.00664782	0.0654822	Fam102b	3	108878313	108934923	-1	family with sequence similarity 102, member B [Source:MGI Symbol;Acc:MGI:3036259]	0.0848787
ENSMUSG00000030335	1163.41	-0.216979	0.0799533	-2.71383	0.00665109	0.0654822	Mrpl51	6	125168764	125173232	1	mitochondrial ribosomal protein L51 [Source:MGI Symbol;Acc:MGI:1913743]	0.0848787
ENSMUSG00000029014	1184.11	-0.185512	0.0683602	-2.71375	0.00665265	0.0654822	Dnajc2	5	21962265	21990249	-1	DnaJ heat shock protein family (Hsp40) member C2 [Source:MGI Symbol;Acc:MGI:99470]	0.0848787
ENSMUSG00000078695	975.526	-0.226398	0.0834737	-2.7122	0.00668372	0.065743	Cisd3	11	97576652	97579447	1	CDGSH iron sulfur domain 3 [Source:MGI Symbol;Acc:MGI:101788]	0.0852201
ENSMUSG00000066892	168.212	0.47736	0.176016	2.71202	0.0066875	0.065743	Fbxl12	9	20529414	20556063	-1	F-box and leucine-rich repeat protein 12 [Source:MGI Symbol;Acc:MGI:1354738]	0.0852201
ENSMUSG00000039860	1222.35	0.254061	0.0937361	2.71039	0.00672046	0.0660258	Srrm3	5	135835744	135903626	1	serine/arginine repetitive matrix 3 [Source:MGI Symbol;Acc:MGI:1920309]	0.0855882
ENSMUSG00000014504	935.021	-0.209073	0.0771652	-2.70942	0.00674005	0.0661769	Srp19	18	34463900	34469652	1	signal recognition particle 19 [Source:MGI Symbol;Acc:MGI:1913634]	0.0857858
ENSMUSG00000039242	257.458	0.355611	0.131271	2.70898	0.006749	0.0662235	B3galnt2	13	14129054	14173688	1	UDP-GalNAc:betaGlcNAc beta 1,3-galactosaminyltransferase, polypeptide 2 [Source:MGI Symbol;Acc:MGI:2145517]	0.0858478
ENSMUSG00000058427	37.4555	1.5569	0.574902	2.70812	0.00676662	0.0663222	Cxcl2	5	91051730	91053797	1	chemokine (C-X-C motif) ligand 2 [Source:MGI Symbol;Acc:MGI:1340094]	0.0859789
ENSMUSG00000041775	579.944	0.240949	0.0889743	2.70807	0.00676748	0.0663222	Mapk1ip1	7	138437552	138448002	-1	mitogen-activated protein kinase 1 interacting protein 1 [Source:MGI Symbol;Acc:MGI:1916796]	0.0859789
ENSMUSG00000039067	3243.95	-0.146282	0.0540214	-2.70784	0.00677222	0.0663273	Psmd7	8	108307013	108315096	-1	proteasome (prosome, macropain) 26S subunit, non-ATPase, 7 [Source:MGI Symbol;Acc:MGI:1351511]	0.0859871
ENSMUSG00000021139	533.811	-0.380465	0.140552	-2.70695	0.00679055	0.0664654	Gm20498	12	81405634	81579679	-1	predicted gene 20498 [Source:MGI Symbol;Acc:MGI:5141963]	0.0861679
ENSMUSG00000044408	577.713	-0.293657	0.108505	-2.70638	0.00680206	0.0665368	Sptssa	12	54692177	54703358	-1	serine palmitoyltransferase, small subunit A [Source:MGI Symbol;Acc:MGI:1913399]	0.086262
ENSMUSG00000006095	2457.15	-0.160003	0.0591435	-2.70534	0.00682339	0.0666755	Tbcb	7	29923556	29931697	-1	tubulin folding cofactor B [Source:MGI Symbol;Acc:MGI:1913661]	0.0864451
ENSMUSG00000065979	1297.25	-0.194798	0.0720067	-2.70528	0.00682472	0.0666755	Cpped1	16	11621585	11727309	-1	calcineurin-like phosphoesterase domain containing 1 [Source:MGI Symbol;Acc:MGI:2443300]	0.0864451
ENSMUSG00000024283	2113.1	0.207556	0.0767359	2.7048	0.00683449	0.0667295	Wac	18	7868832	7929028	1	WW domain containing adaptor with coiled-coil [Source:MGI Symbol;Acc:MGI:2387357]	0.0865167
ENSMUSG00000109198	14.8262	1.55995	0.577482	2.70129	0.00690711	0.0673772	D7Bwg0826e	7	44543729	44547523	-1	DNA segment, Chr 7, Brigham & Women's Genetics 0826 expressed [Source:MGI Symbol;Acc:MGI:106455]	0.0873597
ENSMUSG00000041881	1184.53	-0.36939	0.136751	-2.70118	0.00690938	0.0673772	Ndufa7	17	34043546	34057291	1	NADH:ubiquinone oxidoreductase subunit A7 [Source:MGI Symbol;Acc:MGI:1913666]	0.0873597
ENSMUSG00000002064	1597.32	-0.213736	0.0791423	-2.70066	0.00692026	0.0674415	Sdf2	11	78136572	78146322	1	stromal cell derived factor 2 [Source:MGI Symbol;Acc:MGI:108019]	0.0874446
ENSMUSG00000022948	57.9913	0.687596	0.254673	2.69992	0.00693568	0.06755	Setd4	16	93380345	93400951	-1	SET domain containing 4 [Source:MGI Symbol;Acc:MGI:2136890]	0.087587
ENSMUSG00000027398	127.211	1.04081	0.385806	2.69776	0.00698072	0.0679285	Il1b	2	129206490	129213059	-1	interleukin 1 beta [Source:MGI Symbol;Acc:MGI:96543]	0.088081
ENSMUSG00000067274	6670.3	-0.201081	0.0745394	-2.69765	0.00698318	0.0679285	Rplp0	5	115697526	115701786	1	ribosomal protein, large, P0 [Source:MGI Symbol;Acc:MGI:1927636]	0.088081
ENSMUSG00000035370	38.8057	1.06858	0.396225	2.69691	0.00699859	0.0680347	Gm49322	10	80441855	80451618	1	predicted gene, 49322 [Source:MGI Symbol;Acc:MGI:6121503]	0.0882224
ENSMUSG00000079677	469.136	-0.261594	0.0970047	-2.69671	0.00700278	0.0680347	Fdx2	9	20978816	20984910	-1	ferredoxin 2 [Source:MGI Symbol;Acc:MGI:1915415]	0.0882224
ENSMUSG00000058443	4080.38	-0.160554	0.0595443	-2.69638	0.00700985	0.0680347	Rpl10-ps3	9	50255501	50256268	-1	ribosomal protein L10, pseudogene 3 [Source:MGI Symbol;Acc:MGI:3704336]	0.0882317
ENSMUSG00000031093	4363.62	-0.15126	0.0561043	-2.69606	0.00701656	0.0680347	Dock11	X	35152485	35340215	1	dedicator of cytokinesis 11 [Source:MGI Symbol;Acc:MGI:1923224]	0.0882317
ENSMUSG00000026425	1473.56	0.188781	0.0700319	2.69565	0.00702525	0.0680347	Srgap2	1	131212989	131455090	-1	SLIT-ROBO Rho GTPase activating protein 2 [Source:MGI Symbol;Acc:MGI:109605]	0.0882317
ENSMUSG00000061894	100.274	0.810799	0.300784	2.69561	0.00702588	0.0680347	Zscan20	4	128477332	128503891	-1	zinc finger and SCAN domains 20 [Source:MGI Symbol;Acc:MGI:2679268]	0.0882317
ENSMUSG00000019876	887.074	-0.319016	0.118349	-2.69556	0.00702706	0.0680347	Pkib	10	57508077	57617208	1	protein kinase inhibitor beta, cAMP dependent, testis specific [Source:MGI Symbol;Acc:MGI:101937]	0.0882317
ENSMUSG00000019433	1782.08	-0.16562	0.0614434	-2.69548	0.00702868	0.0680347	Gipc1	8	84379306	84391323	1	GIPC PDZ domain containing family, member 1 [Source:MGI Symbol;Acc:MGI:1926252]	0.0882317
ENSMUSG00000022346	339.477	0.32111	0.119139	2.69526	0.00703334	0.0680379	Myc	15	61857240	61862223	1	myelocytomatosis oncogene [Source:MGI Symbol;Acc:MGI:97250]	0.0882376
ENSMUSG00000108042	3.39437	4.04997	1.50295	2.69467	0.00704582	NA	B130021K23Rik	6	87807256	87809848	-1	RIKEN cDNA B130021K23 gene [Source:MGI Symbol;Acc:MGI:2442518]	0.0883298
ENSMUSG00000031425	12149.9	-0.255309	0.0947596	-2.69428	0.00705408	0.0681458	Plp1	X	135723420	135740482	1	proteolipid protein (myelin) 1 [Source:MGI Symbol;Acc:MGI:97623]	0.0883298
ENSMUSG00000096719	323.652	-0.356257	0.132228	-2.69426	0.00705442	0.0681458	Mrgpra2b	7	47113554	47178610	-1	MAS-related GPR, member A2B [Source:MGI Symbol;Acc:MGI:3033098]	0.0883298
ENSMUSG00000031596	2577.41	-0.190697	0.0707829	-2.69412	0.00705748	0.0681458	Slc7a2	8	41315433	41375345	1	solute carrier family 7 (cationic amino acid transporter, y+ system), member 2 [Source:MGI Symbol;Acc:MGI:99828]	0.0883298
ENSMUSG00000040594	283.34	-0.37506	0.139282	-2.6928	0.00708539	0.0683388	Ranbp17	11	33161795	33463746	-1	RAN binding protein 17 [Source:MGI Symbol;Acc:MGI:1929706]	0.0885848
ENSMUSG00000002668	14.265	1.74497	0.648034	2.69272	0.00708722	0.0683388	Dennd1c	17	57372905	57385514	-1	DENN/MADD domain containing 1C [Source:MGI Symbol;Acc:MGI:1918035]	0.0885848
ENSMUSG00000021967	480.189	-0.280378	0.10413	-2.69256	0.00709049	0.0683388	Mrpl57	14	58063691	58066753	1	mitochondrial ribosomal protein L57 [Source:MGI Symbol;Acc:MGI:1915090]	0.0885848
ENSMUSG00000099927	8.55659	2.17179	0.806649	2.69236	0.00709482	NA	Gm8226	9	84306037	84306834	1	predicted gene 8226 [Source:MGI Symbol;Acc:MGI:3643827]	0.0885864
ENSMUSG00000025577	120.675	0.561995	0.208875	2.69059	0.0071326	0.0686943	Cbx2	11	118913788	118922096	1	chromobox 2 [Source:MGI Symbol;Acc:MGI:88289]	0.0889961
ENSMUSG00000027907	748.53	-0.248065	0.0922028	-2.69043	0.0071361	0.0686943	S100a11	3	93427795	93433594	1	S100 calcium binding protein A11 [Source:MGI Symbol;Acc:MGI:1338798]	0.0889961
ENSMUSG00000019122	32.8458	0.973134	0.361746	2.6901	0.00714298	0.0687185	Ccl9	11	83463745	83469462	-1	chemokine (C-C motif) ligand 9 [Source:MGI Symbol;Acc:MGI:104533]	0.0890291
ENSMUSG00000063694	2113.51	-0.204036	0.0758592	-2.68967	0.00715223	0.0687654	Cycs	6	50539543	50543518	-1	cytochrome c, somatic [Source:MGI Symbol;Acc:MGI:88578]	0.0890917
ENSMUSG00000031816	1529.97	0.187314	0.0696521	2.68929	0.00716047	0.0688025	Mthfsd	8	121818367	121835131	-1	methenyltetrahydrofolate synthetase domain containing [Source:MGI Symbol;Acc:MGI:2679252]	0.0890937
ENSMUSG00000100937	10.1511	1.79663	0.668092	2.6892	0.00716235	NA	Nscme3l	19	5552795	5553815	-1	NSE3 homolog, SMC5-SMC6 complex component like [Source:MGI Symbol;Acc:MGI:1922805]	0.0890937
ENSMUSG00000076614	32.4307	-7.9144	2.94317	-2.68907	0.0071651	0.0688051	Ighg1	12	113288860	113294143	-1	immunoglobulin heavy constant gamma 1 (G1m marker) [Source:MGI Symbol;Acc:MGI:96446]	0.0890937
ENSMUSG00000052133	248.818	0.385254	0.143285	2.68873	0.00717253	0.0688344	Sema5b	16	35361515	35485102	1	sema domain, seven thrombospondin repeats (type 1 and type 1-like), transmembrane domain (TM) and short cytoplasmic domain, (semaphorin) 5B [Source:MGI Symbol;Acc:MGI:107555]	0.0891334
ENSMUSG00000025967	3334.14	-0.228311	0.084943	-2.68781	0.00719223	0.0689814	Eef1b2	1	63215984	63219645	1	eukaryotic translation elongation factor 1 beta 2 [Source:MGI Symbol;Acc:MGI:1929520]	0.0893255
ENSMUSG00000091575	3.90893	3.95088	1.47058	2.68661	0.00721812	NA	2010016I18Rik	3	106389298	106393229	-1	RIKEN cDNA 2010016I18 gene [Source:MGI Symbol;Acc:MGI:1916456]	0.089587
ENSMUSG00000039813	47.9974	0.886875	0.33013	2.68644	0.00722181	0.0692229	Tbc1d2	4	46604390	46650209	-1	TBC1 domain family, member 2 [Source:MGI Symbol;Acc:MGI:2652885]	0.089587
ENSMUSG00000068882	2627.58	-0.165132	0.0614798	-2.68596	0.00723226	0.0692809	Ssb	2	69691906	69702190	1	Sjogren syndrome antigen B [Source:MGI Symbol;Acc:MGI:98423]	0.0896638
ENSMUSG00000027574	197.627	-0.416647	0.155156	-2.68534	0.00724553	0.0693658	Nkain4	2	180576565	180596492	-1	Na+/K+ transporting ATPase interacting 4 [Source:MGI Symbol;Acc:MGI:1915372]	0.0897755
ENSMUSG00000028495	4614.83	-0.2196	0.0817938	-2.6848	0.00725724	0.0694357	Rps6	4	86772897	86775649	-1	ribosomal protein S6 [Source:MGI Symbol;Acc:MGI:98159]	0.0898676
ENSMUSG00000113902	722.72	-0.390824	0.145656	-2.6832	0.00729212	0.0697271	Ndufb1	12	101934349	101943327	-1	NADH:ubiquinone oxidoreductase subunit B1 [Source:MGI Symbol;Acc:MGI:3780865]	0.0902465
ENSMUSG00000039713	599.66	0.292449	0.109053	2.68172	0.00732449	0.0699864	Plekhg5	4	152156955	152199857	1	pleckstrin homology domain containing, family G (with RhoGef domain) member 5 [Source:MGI Symbol;Acc:MGI:2652860]	0.0905856
ENSMUSG00000002477	677.747	-0.241943	0.0902248	-2.68155	0.00732814	0.0699864	Snrpd1	18	10617775	10642079	1	small nuclear ribonucleoprotein D1 [Source:MGI Symbol;Acc:MGI:98344]	0.0905856
ENSMUSG00000026895	2093.3	-0.214048	0.07984	-2.68097	0.00734098	0.0700629	Ndufa8	2	35926338	35939418	-1	NADH:ubiquinone oxidoreductase subunit A8 [Source:MGI Symbol;Acc:MGI:1915625]	0.0906882
ENSMUSG00000040118	6531.96	-0.182729	0.0681627	-2.68078	0.00734505	0.0700629	Cacna2d1	5	16139689	16579509	1	calcium channel, voltage-dependent, alpha2/delta subunit 1 [Source:MGI Symbol;Acc:MGI:88295]	0.0906882
ENSMUSG00000028223	1237.11	-0.188595	0.0703677	-2.68013	0.00735929	0.0701201	Decr1	4	15917240	15945507	-1	2,4-dienoyl CoA reductase 1, mitochondrial [Source:MGI Symbol;Acc:MGI:1914710]	0.0907709
ENSMUSG00000027180	3058.67	-0.161366	0.0602145	-2.67986	0.00736535	0.0701201	Fbxo3	2	103858066	103893585	1	F-box protein 3 [Source:MGI Symbol;Acc:MGI:1929084]	0.0907709
ENSMUSG00000035885	3902.68	-0.154399	0.0576216	-2.67954	0.0073724	0.0701201	Cox8a	19	7192518	7194981	-1	cytochrome c oxidase subunit 8A [Source:MGI Symbol;Acc:MGI:105959]	0.0907709
ENSMUSG00000040435	1378.76	0.411446	0.153553	2.6795	0.00737313	0.0701201	Ppp1r15a	7	45172340	45175692	-1	protein phosphatase 1, regulatory subunit 15A [Source:MGI Symbol;Acc:MGI:1927072]	0.0907709
ENSMUSG00000024066	144.52	0.734774	0.274221	2.6795	0.00737333	0.0701201	Xdh	17	74190890	74257191	-1	xanthine dehydrogenase [Source:MGI Symbol;Acc:MGI:98973]	0.0907709
ENSMUSG00000106992	2.57694	4.66415	1.74108	2.67889	0.00738675	NA	Gm43167	5	74590161	74591766	-1	predicted gene 43167 [Source:MGI Symbol;Acc:MGI:5663304]	0.090883
ENSMUSG00000020949	2817.78	-0.173605	0.0648138	-2.67852	0.00739484	0.0702612	Fkbp3	12	65109198	65120781	-1	FK506 binding protein 3 [Source:MGI Symbol;Acc:MGI:1353460]	0.0909038
ENSMUSG00000025508	2065.35	-0.191023	0.0713195	-2.67842	0.00739709	0.0702612	Rplp2	7	141027283	141031498	1	ribosomal protein, large P2 [Source:MGI Symbol;Acc:MGI:1914436]	0.0909038
ENSMUSG00000057036	1395.94	-0.192259	0.0718108	-2.6773	0.00742191	0.0704544	Gm7536	3	24387232	24387675	1	predicted gene 7536 [Source:MGI Symbol;Acc:MGI:3645137]	0.0911556
ENSMUSG00000022354	2028.15	-0.27747	0.103649	-2.67703	0.00742787	0.0704685	Ndufb9	15	58805605	58811337	1	NADH:ubiquinone oxidoreductase subunit B9 [Source:MGI Symbol;Acc:MGI:1913468]	0.0911756
ENSMUSG00000038517	1029.15	0.236845	0.0884856	2.67665	0.00743627	0.0704738	Tbkbp1	11	97026997	97042321	-1	TBK1 binding protein 1 [Source:MGI Symbol;Acc:MGI:1920424]	0.0911892
ENSMUSG00000032128	16.5386	1.60814	0.600818	2.67659	0.00743765	0.0704738	Robo3	9	37326965	37344542	-1	roundabout guidance receptor 3 [Source:MGI Symbol;Acc:MGI:1343102]	0.0911892
ENSMUSG00000022091	650.926	0.343153	0.128221	2.67627	0.00744469	0.0704738	Sorbs3	14	70417917	70449438	-1	sorbin and SH3 domain containing 3 [Source:MGI Symbol;Acc:MGI:700013]	0.0911894
ENSMUSG00000037072	5057.6	-0.193083	0.0721484	-2.67619	0.00744633	0.0704738	Selenof	3	144276065	144303441	1	selenoprotein F [Source:MGI Symbol;Acc:MGI:1927947]	0.0911894
ENSMUSG00000042308	1546.25	0.311555	0.116485	2.67465	0.00748082	0.0707576	Setd1a	7	127375842	127399294	1	SET domain containing 1A [Source:MGI Symbol;Acc:MGI:2446244]	0.0915584
ENSMUSG00000073680	50.1644	0.901058	0.337033	2.6735	0.00750642	0.0709571	Tmem88b	4	155866048	155870331	-1	transmembrane protein 88B [Source:MGI Symbol;Acc:MGI:2444329]	0.0918183
ENSMUSG00000001420	2653.54	-0.227607	0.0852126	-2.67105	0.00756143	0.0714112	Tmem79	3	88235962	88243455	-1	transmembrane protein 79 [Source:MGI Symbol;Acc:MGI:1919163]	0.0924095
ENSMUSG00000059734	1904.5	-0.237416	0.0888881	-2.67096	0.00756353	0.0714112	Ndufs8	19	3958863	3962774	-1	NADH:ubiquinone oxidoreductase core subunit S8 [Source:MGI Symbol;Acc:MGI:2385079]	0.0924095
ENSMUSG00000024208	1103.75	-0.311317	0.116588	-2.67022	0.00758011	0.0715248	Uqcc2	17	27341637	27352890	-1	ubiquinol-cytochrome c reductase complex assembly factor 2 [Source:MGI Symbol;Acc:MGI:1914517]	0.0925583
ENSMUSG00000020180	1236.83	-0.2455	0.0919932	-2.66867	0.00761515	0.0718124	Snrpd3	10	75353385	75373215	1	small nuclear ribonucleoprotein D3 [Source:MGI Symbol;Acc:MGI:1914582]	0.0929322
ENSMUSG00000031150	235.341	0.686752	0.257425	2.66777	0.00763563	0.071925	Ccdc120	X	7597953	7617144	-1	coiled-coil domain containing 120 [Source:MGI Symbol;Acc:MGI:1859619]	0.0930815
ENSMUSG00000026131	44353	-0.235393	0.0882367	-2.66774	0.00763623	0.071925	Dst	1	33947306	34347742	1	dystonin [Source:MGI Symbol;Acc:MGI:104627]	0.0930815
ENSMUSG00000002748	1689.61	0.176585	0.0662129	2.66692	0.00765494	0.0720581	Baz1b	5	135216118	135274983	1	bromodomain adjacent to zinc finger domain, 1B [Source:MGI Symbol;Acc:MGI:1353499]	0.0932556
ENSMUSG00000073433	2660.03	-0.171082	0.0641557	-2.66667	0.00766074	0.0720645	Arhgdig	17	26418157	26426760	-1	Rho GDP dissociation inhibitor (GDI) gamma [Source:MGI Symbol;Acc:MGI:108430]	0.0932687
ENSMUSG00000040138	371.897	-0.284946	0.106862	-2.66649	0.00766489	0.0720645	Ndp	X	16751760	16778013	-1	Norrie disease (pseudoglioma) (human) [Source:MGI Symbol;Acc:MGI:102570]	0.0932687
ENSMUSG00000073968	170.605	0.459173	0.172214	2.66629	0.00766936	0.0720645	Trim68	7	102326789	102336534	-1	tripartite motif-containing 68 [Source:MGI Symbol;Acc:MGI:2142077]	0.0932692
ENSMUSG00000028127	2285.55	-0.153714	0.0576595	-2.6659	0.00767826	0.0721051	Abcd3	3	121552423	121608951	-1	ATP-binding cassette, sub-family D (ALD), member 3 [Source:MGI Symbol;Acc:MGI:1349216]	0.0933235
ENSMUSG00000031604	5357.5	-0.199351	0.0748119	-2.6647	0.00770567	0.0722579	Msmo1	8	65171173	65186826	-1	methylsterol monoxygenase 1 [Source:MGI Symbol;Acc:MGI:1913484]	0.0935266
ENSMUSG00000014769	4714.37	-0.194256	0.0728998	-2.66469	0.00770582	0.0722579	Psmb1	17	15695283	15720013	-1	proteasome (prosome, macropain) subunit, beta type 1 [Source:MGI Symbol;Acc:MGI:104884]	0.0935266
ENSMUSG00000034744	1657.69	-0.168681	0.0633047	-2.66459	0.00770831	0.0722579	Nagk	6	83771964	83781000	1	N-acetylglucosamine kinase [Source:MGI Symbol;Acc:MGI:1860418]	0.0935266
ENSMUSG00000110317	26.1342	1.39925	0.525266	2.66389	0.00772428	0.0723641	Gm45250	8	26641916	26645507	-1	predicted gene 45250 [Source:MGI Symbol;Acc:MGI:5791086]	0.0936664
ENSMUSG00000029862	14.0119	1.64864	0.618931	2.66369	0.00772883	0.0723641	Clcn1	6	42263619	42292690	1	chloride channel, voltage-sensitive 1 [Source:MGI Symbol;Acc:MGI:88417]	0.0936676
ENSMUSG00000042712	901.325	-0.352848	0.132507	-2.66286	0.00774802	0.0725006	Tceal9	X	135145828	135147888	1	transcription elongation factor A like 9 [Source:MGI Symbol;Acc:MGI:109567]	0.093846
ENSMUSG00000028081	4455	-0.169183	0.0635433	-2.66248	0.00775672	0.072539	Rps3a1	3	86045247	86050009	-1	ribosomal protein S3A1 [Source:MGI Symbol;Acc:MGI:1202063]	0.0938974
ENSMUSG00000035299	296.684	0.474921	0.1784	2.66211	0.00776532	0.0725762	Mid1	X	168468195	168788732	1	midline 1 [Source:MGI Symbol;Acc:MGI:1100537]	0.0939474
ENSMUSG00000032258	138.261	0.492731	0.185255	2.65974	0.00782009	0.0730447	Lca5	9	83272346	83323180	-1	Leber congenital amaurosis 5 (human) [Source:MGI Symbol;Acc:MGI:1923032]	0.0945557
ENSMUSG00000032582	1158.8	0.209448	0.0787571	2.65942	0.00782756	0.0730711	Rbm6	9	107650758	107750436	-1	RNA binding motif protein 6 [Source:MGI Symbol;Acc:MGI:1338037]	0.0945916
ENSMUSG00000053588	3.39508	4.09175	1.53924	2.65829	0.0078538	NA	A730061H03Rik	14	55796554	55797865	-1	RIKEN cDNA A730061H03 gene [Source:MGI Symbol;Acc:MGI:2445099]	0.0948542
ENSMUSG00000043284	524.313	-0.270488	0.101787	-2.6574	0.0078747	0.0734676	Tmem11	11	60755278	60770098	-1	transmembrane protein 11 [Source:MGI Symbol;Acc:MGI:2144726]	0.0950521
ENSMUSG00000034826	524.721	0.243359	0.0916069	2.65656	0.00789416	0.0736056	Nup54	5	92563399	92583078	-1	nucleoporin 54 [Source:MGI Symbol;Acc:MGI:1920460]	0.0952323
ENSMUSG00000018412	2031.4	0.197859	0.0744874	2.65628	0.0079009	0.0736248	Kansl1	11	104224055	104359687	-1	KAT8 regulatory NSL complex subunit 1 [Source:MGI Symbol;Acc:MGI:1923969]	0.095259
ENSMUSG00000043987	816.725	0.318576	0.119975	2.65535	0.00792262	0.0737835	Cep164	9	45678244	45739989	-1	centrosomal protein 164 [Source:MGI Symbol;Acc:MGI:2384878]	0.0954662
ENSMUSG00000030699	7.32389	2.32839	0.877201	2.65434	0.00794638	NA	Tbx6	7	126380655	126384732	1	T-box 6 [Source:MGI Symbol;Acc:MGI:102539]	0.0956778
ENSMUSG00000042492	2950.03	0.151106	0.0569307	2.65422	0.00794928	0.073988	Tbc1d10b	7	126796631	126807640	-1	TBC1 domain family, member 10b [Source:MGI Symbol;Acc:MGI:1915699]	0.0956778
ENSMUSG00000107571	5.65611	2.82143	1.0631	2.65396	0.00795533	NA	Gm43877	6	46026092	46028329	1	predicted gene, 43877 [Source:MGI Symbol;Acc:MGI:5690269]	0.095696
ENSMUSG00000033788	3364.98	0.277036	0.104444	2.65249	0.00798995	0.0743226	Dysf	6	83985572	84188042	1	dysferlin [Source:MGI Symbol;Acc:MGI:1349385]	0.0960574
ENSMUSG00000061477	2727.09	-0.279916	0.10554	-2.65223	0.0079961	0.0743359	Rps7	12	28680853	28685952	-1	ribosomal protein S7 [Source:MGI Symbol;Acc:MGI:1333818]	0.0960765
ENSMUSG00000030842	2088.54	-0.151116	0.0569852	-2.65184	0.00800535	0.0743779	Lamtor1	7	101555111	101575882	1	late endosomal/lysosomal adaptor, MAPK and MTOR activator 1 [Source:MGI Symbol;Acc:MGI:1913758]	0.0961327
ENSMUSG00000094306	2.74668	-5.08868	1.91911	-2.65158	0.00801154	NA	Gm24924	18	14780824	14780987	-1	predicted gene, 24924 [Source:MGI Symbol;Acc:MGI:5454701]	0.0961522
ENSMUSG00000000740	3633.31	-0.236696	0.0892754	-2.6513	0.0080182	0.0744534	Rpl13	8	123829089	123831983	1	ribosomal protein L13 [Source:MGI Symbol;Acc:MGI:105922]	0.0961773
ENSMUSG00000018930	5.91253	2.558	0.966028	2.64796	0.00809801	NA	Ccl4	11	83553410	83555509	1	chemokine (C-C motif) ligand 4 [Source:MGI Symbol;Acc:MGI:98261]	0.0970792
ENSMUSG00000057455	2141.04	-0.146949	0.0555045	-2.64751	0.00810879	0.0752501	Rit2	18	31106542	31450343	-1	Ras-like without CAAX 2 [Source:MGI Symbol;Acc:MGI:108054]	0.0971531
ENSMUSG00000029223	68745	-0.11392	0.0430521	-2.6461	0.00814269	0.0755202	Uchl1	5	66833434	66844577	1	ubiquitin carboxy-terminal hydrolase L1 [Source:MGI Symbol;Acc:MGI:103149]	0.0975037
ENSMUSG00000023495	7335.61	0.156146	0.0590275	2.64531	0.00816154	0.0756504	Pcbp4	9	106330490	106341211	1	poly(rC) binding protein 4 [Source:MGI Symbol;Acc:MGI:1890471]	0.0976418
ENSMUSG00000056306	224.359	-0.389565	0.147285	-2.64498	0.00816947	0.0756656	Sertm1	3	54804489	54823308	-1	serine rich and transmembrane domain containing 1 [Source:MGI Symbol;Acc:MGI:3607715]	0.0976418
ENSMUSG00000097993	5.33571	3.82127	1.44475	2.64494	0.00817055	NA	Ptprv	1	135036235	135060332	-1	protein tyrosine phosphatase, receptor type, V [Source:MGI Symbol;Acc:MGI:108027]	0.0976418
ENSMUSG00000090100	8751.13	-0.217788	0.0823444	-2.64485	0.00817278	0.0756656	Ttbk2	2	120563297	120681085	-1	tau tubulin kinase 2 [Source:MGI Symbol;Acc:MGI:2155779]	0.0976418
ENSMUSG00000005373	34.2572	1.18762	0.44907	2.64461	0.00817842	0.0756732	Mlxipl	5	135118744	135167236	1	MLX interacting protein-like [Source:MGI Symbol;Acc:MGI:1927999]	0.0976537
ENSMUSG00000037022	375.726	0.304392	0.115125	2.644	0.00819324	0.0757521	Mmaa	8	79990227	80021566	-1	methylmalonic aciduria (cobalamin deficiency) type A [Source:MGI Symbol;Acc:MGI:1923805]	0.0977594
ENSMUSG00000090862	1598.08	-0.256291	0.0969379	-2.64386	0.00819657	0.0757521	Rps13	7	115930740	115933430	-1	ribosomal protein S13 [Source:MGI Symbol;Acc:MGI:1915302]	0.0977594
ENSMUSG00000097750	58.2476	0.69976	0.264727	2.64332	0.00820964	0.0757638	Gm4673	7	30656334	30661044	1	predicted gene 4673 [Source:MGI Symbol;Acc:MGI:3782854]	0.0977805
ENSMUSG00000038384	849.358	0.239211	0.0904968	2.64331	0.00820991	0.0757638	Setd1b	5	123280256	123306692	1	SET domain containing 1B [Source:MGI Symbol;Acc:MGI:2652820]	0.0977805
ENSMUSG00000113362	21.672	1.18655	0.448905	2.64322	0.00821228	0.0757638	Gm40557	12	100204013	100208703	-1	predicted gene, 40557 [Source:MGI Symbol;Acc:MGI:5623442]	0.0977805
ENSMUSG00000107927	5.27755	2.75252	1.04154	2.64273	0.008224	NA	Gm44090	6	86016916	86018749	1	predicted gene, 44090 [Source:MGI Symbol;Acc:MGI:5690482]	0.0978647
ENSMUSG00000052914	2138.58	-0.177866	0.0673141	-2.64232	0.0082339	0.0758862	Cyp2j6	4	96404375	96441898	-1	cytochrome P450, family 2, subfamily j, polypeptide 6 [Source:MGI Symbol;Acc:MGI:1270148]	0.0978871
ENSMUSG00000031728	455.53	0.293819	0.111199	2.64227	0.00823519	0.0758862	Zfp821	8	110432178	110451564	1	zinc finger protein 821 [Source:MGI Symbol;Acc:MGI:1923121]	0.0978871
ENSMUSG00000023249	630.742	0.272061	0.103005	2.64123	0.00826049	0.0760748	Parp3	9	106347521	106354148	-1	poly (ADP-ribose) polymerase family, member 3 [Source:MGI Symbol;Acc:MGI:1891258]	0.0981323
ENSMUSG00000031839	2491.83	-0.171603	0.0649797	-2.64087	0.00826924	0.0760824	Hsbp1	8	120071227	120075661	1	heat shock factor binding protein 1 [Source:MGI Symbol;Acc:MGI:1915446]	0.0981462
ENSMUSG00000021357	1857.43	-0.15824	0.0599211	-2.6408	0.00827098	0.0760824	Exoc2	13	30997902	31158076	-1	exocyst complex component 2 [Source:MGI Symbol;Acc:MGI:1913732]	0.0981462
ENSMUSG00000024261	8353.04	-0.171529	0.0649605	-2.64051	0.00827822	0.0761045	Syt4	18	31570861	31580459	-1	synaptotagmin IV [Source:MGI Symbol;Acc:MGI:101759]	0.0981767
ENSMUSG00000097414	3.50537	3.8799	1.46952	2.64025	0.00828442	NA	B130046B21Rik	15	98704905	98713958	1	RIKEN cDNA B130046B21 gene [Source:MGI Symbol;Acc:MGI:3704458]	0.0981949
ENSMUSG00000026411	1649.34	-0.184986	0.070071	-2.63998	0.00829113	0.0761787	Tmem9	1	135935888	135963080	1	transmembrane protein 9 [Source:MGI Symbol;Acc:MGI:1913491]	0.0982191
ENSMUSG00000031176	10345.3	-0.150308	0.0569561	-2.63901	0.00831482	0.0763517	Dynlt3	X	9520506	9529242	-1	dynein light chain Tctex-type 3 [Source:MGI Symbol;Acc:MGI:1914367]	0.0984442
ENSMUSG00000031169	1011.76	0.216752	0.0821617	2.63811	0.00833687	0.0765053	Porcn	X	8060087	8072764	-1	porcupine O-acyltransferase [Source:MGI Symbol;Acc:MGI:1890212]	0.0986462
ENSMUSG00000036875	28.531	1.19572	0.453279	2.63794	0.00834126	0.0765053	Dna2	10	62782805	62809964	1	DNA replication helicase/nuclease 2 [Source:MGI Symbol;Acc:MGI:2443732]	0.0986462
ENSMUSG00000003526	151.754	0.555442	0.210581	2.63766	0.00834801	0.0765174	Prodh	16	17878221	17908067	-1	proline dehydrogenase [Source:MGI Symbol;Acc:MGI:97770]	0.098666
ENSMUSG00000032679	2682.57	-0.222203	0.084248	-2.63749	0.0083523	0.0765174	Cd59a	2	103926146	103945699	1	CD59a antigen [Source:MGI Symbol;Acc:MGI:109177]	0.098666
ENSMUSG00000020883	2220.59	0.183176	0.0694689	2.63681	0.00836889	0.0765945	Fbxl20	11	97973382	98041229	-1	F-box and leucine-rich repeat protein 20 [Source:MGI Symbol;Acc:MGI:1919444]	0.0987695
ENSMUSG00000024026	5378.8	-0.136702	0.0518449	-2.63675	0.00837045	0.0765945	Glo1	17	30803910	30845845	-1	glyoxalase 1 [Source:MGI Symbol;Acc:MGI:95742]	0.0987695
ENSMUSG00000027710	1117.82	0.254604	0.0965706	2.63645	0.00837778	0.076617	Acad9	3	36120128	36147002	1	acyl-Coenzyme A dehydrogenase family, member 9 [Source:MGI Symbol;Acc:MGI:1914272]	0.0988005
ENSMUSG00000034892	1567.07	-0.185423	0.0703783	-2.63466	0.00842212	0.076914	Rps29	12	69204496	69205960	-1	ribosomal protein S29 [Source:MGI Symbol;Acc:MGI:107681]	0.0991895
ENSMUSG00000063406	826.95	-0.1986	0.0753816	-2.6346	0.00842363	0.076914	Tmed5	5	108254232	108280486	-1	transmembrane p24 trafficking protein 5 [Source:MGI Symbol;Acc:MGI:1921586]	0.0991895
ENSMUSG00000028691	3401.15	-0.226729	0.08606	-2.63455	0.00842491	0.076914	Prdx1	4	116542741	116558019	1	peroxiredoxin 1 [Source:MGI Symbol;Acc:MGI:99523]	0.0991895
ENSMUSG00000021917	1870.6	-0.175165	0.0665011	-2.63402	0.00843815	0.0769902	Spcs1	14	30721783	30723629	-1	signal peptidase complex subunit 1 homolog (S. cerevisiae) [Source:MGI Symbol;Acc:MGI:1916269]	0.0992899
ENSMUSG00000048022	2268.92	-0.163804	0.0621993	-2.63354	0.00845002	0.0770538	Tmem229a	6	24951140	24956296	-1	transmembrane protein 229A [Source:MGI Symbol;Acc:MGI:2442812]	0.0993739
ENSMUSG00000062070	11670.6	-0.164832	0.0626057	-2.63286	0.00846698	0.0771637	Pgk1	X	105230706	105247305	1	phosphoglycerate kinase 1 [Source:MGI Symbol;Acc:MGI:97555]	0.0995177
ENSMUSG00000041757	10655.6	0.159834	0.0607247	2.63212	0.00848544	0.0772531	Plekha6	1	133091948	133231173	1	pleckstrin homology domain containing, family A member 6 [Source:MGI Symbol;Acc:MGI:2388662]	0.0996391
ENSMUSG00000038665	2423.7	-0.20512	0.0779317	-2.63205	0.00848707	0.0772531	Dgki	6	36822957	37277119	-1	diacylglycerol kinase, iota [Source:MGI Symbol;Acc:MGI:2443430]	0.0996391
ENSMUSG00000021832	3926.46	-0.164884	0.0626489	-2.63187	0.00849151	0.0772531	Psmc6	14	45567245	45587162	1	proteasome (prosome, macropain) 26S subunit, ATPase, 6 [Source:MGI Symbol;Acc:MGI:1914339]	0.0996391
ENSMUSG00000000563	6364.35	-0.189718	0.0721036	-2.63118	0.00850881	0.0773658	Atp5pb	3	105850014	105867415	-1	ATP synthase peripheral stalk-membrane subunit b [Source:MGI Symbol;Acc:MGI:1100495]	0.0997865
ENSMUSG00000037126	294.556	0.573039	0.217884	2.63002	0.00853808	0.0775871	Psd	19	46300526	46315595	-1	pleckstrin and Sec7 domain containing [Source:MGI Symbol;Acc:MGI:1920978]	0.100074
ENSMUSG00000038215	112.373	0.604063	0.229725	2.6295	0.00855095	0.0776592	Cep44	8	56984557	57004082	-1	centrosomal protein 44 [Source:MGI Symbol;Acc:MGI:3525111]	0.100169
ENSMUSG00000109887	23.6711	-1.10748	0.421356	-2.62837	0.00857959	0.0778744	Gm28756	1	18064686	18129280	-1	predicted gene 28756 [Source:MGI Symbol;Acc:MGI:5579462]	0.100449
ENSMUSG00000029535	962.43	-0.195116	0.0742513	-2.62778	0.00859431	0.0779248	Triap1	5	115479284	115481628	1	TP53 regulated inhibitor of apoptosis 1 [Source:MGI Symbol;Acc:MGI:1916326]	0.100518
ENSMUSG00000067847	894.066	-0.289025	0.109989	-2.62775	0.00859504	0.0779248	Romo1	2	155985959	155987717	1	reactive oxygen species modulator 1 [Source:MGI Symbol;Acc:MGI:1914317]	0.100518
ENSMUSG00000015341	2110.79	-0.154991	0.0590082	-2.6266	0.00862437	0.0781457	Golga7	8	23731362	23747090	-1	golgi autoantigen, golgin subfamily a, 7 [Source:MGI Symbol;Acc:MGI:1931029]	0.100805
ENSMUSG00000051355	474.511	-0.338519	0.128894	-2.62634	0.00863085	0.0781594	Commd1	11	22846136	22932382	-1	COMM domain containing 1 [Source:MGI Symbol;Acc:MGI:109474]	0.100824
ENSMUSG00000005161	7046.53	-0.194823	0.0741962	-2.62578	0.00864513	0.0782436	Prdx2	8	85696216	85701463	1	peroxiredoxin 2 [Source:MGI Symbol;Acc:MGI:109486]	0.100935
ENSMUSG00000016918	955.886	-0.239221	0.0911343	-2.62493	0.00866678	0.0783895	Sulf1	1	12762501	12931416	1	sulfatase 1 [Source:MGI Symbol;Acc:MGI:2138563]	0.101127
ENSMUSG00000024142	1289.7	0.189626	0.0722452	2.62475	0.00867121	0.0783895	Mlst8	17	24692525	24698052	-1	MTOR associated protein, LST8 homolog (S. cerevisiae) [Source:MGI Symbol;Acc:MGI:1929514]	0.101127
ENSMUSG00000027784	4421.86	-0.147055	0.0560713	-2.62265	0.00872495	0.0787608	Ppm1l	3	69224194	69468135	1	protein phosphatase 1 (formerly 2C)-like [Source:MGI Symbol;Acc:MGI:2139740]	0.101612
ENSMUSG00000025135	1822.68	-0.16685	0.0636202	-2.6226	0.00872615	0.0787608	Anapc11	11	120489247	120499024	1	anaphase promoting complex subunit 11 [Source:MGI Symbol;Acc:MGI:1913406]	0.101612
ENSMUSG00000029715	297.099	-0.332901	0.126938	-2.62256	0.00872729	0.0787608	Pop7	5	137499700	137500780	-1	processing of precursor 7, ribonuclease P family, (S. cerevisiae) [Source:MGI Symbol;Acc:MGI:1921347]	0.101612
ENSMUSG00000109822	2.91018	4.82927	1.84225	2.6214	0.00875691	NA	Gm8556	7	102169553	102170216	-1	predicted gene 8556 [Source:MGI Symbol;Acc:MGI:3649082]	0.101901
ENSMUSG00000029840	6358.79	-0.132557	0.0505817	-2.62065	0.0087763	0.0791577	Mtpn	6	35485841	35516823	-1	myotrophin [Source:MGI Symbol;Acc:MGI:99445]	0.10207
ENSMUSG00000030727	684.474	0.254208	0.0970108	2.62041	0.00878245	0.0791585	Rabep2	7	126027931	126048417	1	rabaptin, RAB GTPase binding effector protein 2 [Source:MGI Symbol;Acc:MGI:1917564]	0.102075
ENSMUSG00000032842	273.557	0.3531	0.134758	2.62025	0.00878645	0.0791585	Abcc10	17	46614147	46639278	-1	ATP-binding cassette, sub-family C (CFTR/MRP), member 10 [Source:MGI Symbol;Acc:MGI:2386976]	0.102075
ENSMUSG00000042662	825.746	0.247479	0.0944635	2.61984	0.00879707	0.0792089	Dusp15	2	152782917	152793618	-1	dual specificity phosphatase-like 15 [Source:MGI Symbol;Acc:MGI:1934928]	0.102142
ENSMUSG00000060739	1639.75	-0.197809	0.0755378	-2.61867	0.00882723	0.079435	Nsa2	13	97265932	97274445	-1	NSA2 ribosome biogenesis homolog [Source:MGI Symbol;Acc:MGI:1913883]	0.102436
ENSMUSG00000014778	115.461	0.552062	0.210904	2.6176	0.0088551	0.0796403	Fhod1	8	106055795	106074585	-1	formin homology 2 domain containing 1 [Source:MGI Symbol;Acc:MGI:2679008]	0.102703
ENSMUSG00000055491	617.205	0.331496	0.126684	2.61671	0.00887817	0.0798021	Pprc1	19	46033325	46061354	1	peroxisome proliferative activated receptor, gamma, coactivator-related 1 [Source:MGI Symbol;Acc:MGI:2385096]	0.102913
ENSMUSG00000096401	265.476	0.355658	0.135939	2.61631	0.0088886	0.0798503	Gm21811	8	20712103	20727266	1	predicted gene, 21811 [Source:MGI Symbol;Acc:MGI:5433975]	0.102978
ENSMUSG00000062753	966.272	-0.316691	0.121094	-2.61524	0.00891639	0.0800543	AI413582	17	27782547	27784730	-1	expressed sequence AI413582 [Source:MGI Symbol;Acc:MGI:2146839]	0.103243
ENSMUSG00000036438	30695.9	-0.152147	0.0581918	-2.61457	0.00893393	0.080166	Calm2	17	87740840	87754363	-1	calmodulin 2 [Source:MGI Symbol;Acc:MGI:103250]	0.103389
ENSMUSG00000005198	2841.47	0.181937	0.0696061	2.61381	0.00895394	0.0802997	Polr2a	11	69624823	69649463	-1	polymerase (RNA) II (DNA directed) polypeptide A [Source:MGI Symbol;Acc:MGI:98086]	0.103563
ENSMUSG00000074024	23.1192	1.41279	0.54059	2.61343	0.0089639	0.0803433	4632427E13Rik	7	92383374	92390676	-1	RIKEN cDNA 4632427E13 gene [Source:MGI Symbol;Acc:MGI:1915436]	0.103622
ENSMUSG00000086095	5.57617	2.53475	0.969986	2.61318	0.00897043	NA	Gm15328	18	16948778	16955840	1	predicted gene 15328 [Source:MGI Symbol;Acc:MGI:3705182]	0.10364
ENSMUSG00000032330	2964.28	-0.279544	0.106984	-2.61296	0.00897628	0.0804085	Cox7a2	9	79662643	79667160	-1	cytochrome c oxidase subunit 7A2 [Source:MGI Symbol;Acc:MGI:1316715]	0.103651
ENSMUSG00000020133	946.145	-0.205408	0.0786297	-2.61235	0.00899234	0.080484	2310011J03Rik	10	80154088	80156371	-1	RIKEN cDNA 2310011J03 gene [Source:MGI Symbol;Acc:MGI:1913624]	0.103753
ENSMUSG00000037692	957.437	0.263043	0.100696	2.61225	0.00899494	0.080484	Ahdc1	4	132738571	132805421	1	AT hook, DNA binding motif, containing 1 [Source:MGI Symbol;Acc:MGI:2444218]	0.103753
ENSMUSG00000018286	3498.9	-0.179526	0.0687407	-2.61165	0.00901073	0.0805795	Psmb6	11	70416193	70418684	1	proteasome (prosome, macropain) subunit, beta type 6 [Source:MGI Symbol;Acc:MGI:104880]	0.103878
ENSMUSG00000029404	942.367	-0.197777	0.0757382	-2.61132	0.00901933	0.0806106	Arl6ip4	5	124254152	124256259	1	ADP-ribosylation factor-like 6 interacting protein 4 [Source:MGI Symbol;Acc:MGI:1929500]	0.10392
ENSMUSG00000105139	21.0518	1.1895	0.455574	2.61098	0.00902832	0.080631	Gm19391	3	109027849	109030211	-1	predicted gene, 19391 [Source:MGI Symbol;Acc:MGI:5011576]	0.10395
ENSMUSG00000040651	487.927	0.353693	0.13547	2.61085	0.00903186	0.080631	Tasor	14	27150791	27205512	1	transcription activation suppressor [Source:MGI Symbol;Acc:MGI:1921694]	0.10395
ENSMUSG00000032281	3077.14	-0.201915	0.0773433	-2.61063	0.00903756	0.0806362	Acsbg1	9	54512161	54569154	-1	acyl-CoA synthetase bubblegum family member 1 [Source:MGI Symbol;Acc:MGI:2385656]	0.103959
ENSMUSG00000051439	101.361	0.778398	0.298202	2.6103	0.00904622	0.0806677	Cd14	18	36858120	36859851	-1	CD14 antigen [Source:MGI Symbol;Acc:MGI:88318]	0.104002
ENSMUSG00000032872	1304.21	-0.186311	0.0713837	-2.61	0.00905427	0.0806938	Cyb5r4	9	86904067	86959827	1	cytochrome b5 reductase 4 [Source:MGI Symbol;Acc:MGI:2386848]	0.104038
ENSMUSG00000045538	312.475	-0.321091	0.123046	-2.60953	0.00906667	0.0807154	Ddx28	8	106736253	106738514	-1	DEAD box helicase 28 [Source:MGI Symbol;Acc:MGI:1919236]	0.10407
ENSMUSG00000069670	765.571	-0.276878	0.106103	-2.60952	0.00906695	0.0807154	Nkain2	10	31565306	32766458	-1	Na+/K+ transporting ATPase interacting 2 [Source:MGI Symbol;Acc:MGI:1923447]	0.10407
ENSMUSG00000008604	1705.84	0.1815	0.069562	2.60919	0.00907567	0.0807473	Ubqln4	3	88461065	88477032	1	ubiquilin 4 [Source:MGI Symbol;Acc:MGI:2150152]	0.104113
ENSMUSG00000027177	2566.26	-0.133376	0.0511307	-2.60853	0.00909313	0.0808559	Hipk3	2	104256826	104324791	-1	homeodomain interacting protein kinase 3 [Source:MGI Symbol;Acc:MGI:1314882]	0.104256
ENSMUSG00000013593	5103.44	-0.14674	0.0562613	-2.60818	0.00910248	0.0808559	Ndufs2	1	171062422	171078957	-1	NADH:ubiquinone oxidoreductase core subunit S2 [Source:MGI Symbol;Acc:MGI:2385112]	0.104267
ENSMUSG00000056851	5998.67	0.122143	0.0468353	2.60793	0.00910925	0.0808559	Pcbp2	15	102378974	102408496	1	poly(rC) binding protein 2 [Source:MGI Symbol;Acc:MGI:108202]	0.104267
ENSMUSG00000029033	2085.16	0.266782	0.102303	2.60776	0.00911366	0.0808559	Acap3	4	155976279	155991708	1	ArfGAP with coiled-coil, ankyrin repeat and PH domains 3 [Source:MGI Symbol;Acc:MGI:2153589]	0.104267
ENSMUSG00000071655	2920.51	-0.150447	0.0576927	-2.60773	0.00911441	0.0808559	Ubxn1	19	8848860	8853227	1	UBX domain protein 1 [Source:MGI Symbol;Acc:MGI:1289301]	0.104267
ENSMUSG00000027357	473.948	-0.250432	0.0960442	-2.60747	0.00912152	0.0808559	Crls1	2	132688586	132708705	1	cardiolipin synthase 1 [Source:MGI Symbol;Acc:MGI:1913836]	0.104267
ENSMUSG00000052310	722.064	-0.262324	0.100608	-2.60738	0.00912384	0.0808559	Slc39a1	3	90155479	90160919	1	solute carrier family 39 (zinc transporter), member 1 [Source:MGI Symbol;Acc:MGI:1353474]	0.104267
ENSMUSG00000034345	1417.2	-0.22262	0.0854018	-2.60674	0.00914086	0.0809611	Gtf2h5	17	6130061	6136792	1	general transcription factor IIH, polypeptide 5 [Source:MGI Symbol;Acc:MGI:107227]	0.104405
ENSMUSG00000032328	19673	-0.170692	0.0654861	-2.60654	0.00914629	0.0809637	Tmem30a	9	79676225	79700789	-1	transmembrane protein 30A [Source:MGI Symbol;Acc:MGI:106402]	0.104411
ENSMUSG00000045010	2.85592	4.80839	1.84501	2.60615	0.00915661	NA	Gm4779	X	100833659	100838029	-1	predicted gene 4779 [Source:MGI Symbol;Acc:MGI:3646776]	0.104472
ENSMUSG00000052085	263.783	-0.595745	0.22865	-2.60549	0.00917436	0.0811665	Dock8	19	24976898	25179796	1	dedicator of cytokinesis 8 [Source:MGI Symbol;Acc:MGI:1921396]	0.104618
ENSMUSG00000042010	491.832	0.388032	0.148964	2.60487	0.00919087	0.0812669	Acacb	5	114284596	114388822	1	acetyl-Coenzyme A carboxylase beta [Source:MGI Symbol;Acc:MGI:2140940]	0.104749
ENSMUSG00000111619	13.343	1.46754	0.56345	2.60457	0.00919905	0.0812935	Gm48348	9	36001216	36003655	-1	predicted gene, 48348 [Source:MGI Symbol;Acc:MGI:6097812]	0.104785
ENSMUSG00000098650	265.619	-0.628433	0.241383	-2.60347	0.00922852	0.0815082	Commd1b	11	22784744	22932090	-1	COMM domain containing 1B [Source:MGI Symbol;Acc:MGI:5547784]	0.105064
ENSMUSG00000006641	559.471	0.231233	0.0888698	2.60193	0.00926996	0.0818283	Slc5a6	5	31193380	31206268	-1	solute carrier family 5 (sodium-dependent vitamin transporter), member 6 [Source:MGI Symbol;Acc:MGI:2660847]	0.105445
ENSMUSG00000087055	6.4677	2.37237	0.911799	2.60186	0.00927196	NA	Gm11948	11	3303573	3304911	-1	predicted gene 11948 [Source:MGI Symbol;Acc:MGI:3650068]	0.105445
ENSMUSG00000041126	294.305	-0.307927	0.118369	-2.60143	0.0092837	0.0819037	H2az2	11	6377229	6394443	-1	H2A.Z histone variant 2 [Source:MGI Symbol;Acc:MGI:1924855]	0.105521
ENSMUSG00000044857	841.232	0.247058	0.0949951	2.60075	0.00930214	0.0819723	Lemd2	17	27408574	27423443	-1	LEM domain containing 2 [Source:MGI Symbol;Acc:MGI:2385045]	0.105616
ENSMUSG00000090290	50.5955	0.853364	0.328133	2.60066	0.0093044	0.0819723	Tarbp1	8	127152068	127201804	-1	TAR RNA binding protein 1 [Source:MGI Symbol;Acc:MGI:4936930]	0.105616
ENSMUSG00000105572	17.5134	1.24707	0.47954	2.60056	0.00930711	0.0819723	Gm43300	3	119521397	119523439	-1	predicted gene 43300 [Source:MGI Symbol;Acc:MGI:5663437]	0.105616
ENSMUSG00000020268	216.454	0.47222	0.181617	2.60008	0.00932026	0.0819969	Lyrm7	11	54717692	54751742	-1	LYR motif containing 7 [Source:MGI Symbol;Acc:MGI:1922780]	0.105652
ENSMUSG00000049047	5289.9	-0.126349	0.0485945	-2.60008	0.00932031	0.0819969	Armcx3	X	133657344	133662204	1	armadillo repeat containing, X-linked 3 [Source:MGI Symbol;Acc:MGI:1918953]	0.105652
ENSMUSG00000029428	2501.94	0.206751	0.0795344	2.59951	0.00933561	0.0820561	Stx2	5	129061621	129085638	-1	syntaxin 2 [Source:MGI Symbol;Acc:MGI:108059]	0.105733
ENSMUSG00000023912	795.775	0.246218	0.0947196	2.59944	0.00933747	0.0820561	Slc25a27	17	43952782	43978105	-1	solute carrier family 25, member 27 [Source:MGI Symbol;Acc:MGI:1921261]	0.105733
ENSMUSG00000029730	176.322	0.381384	0.146741	2.59903	0.00934876	0.0821094	Mcm7	5	138162845	138170684	-1	minichromosome maintenance complex component 7 [Source:MGI Symbol;Acc:MGI:1298398]	0.105803
ENSMUSG00000103898	16.1153	1.26657	0.487479	2.59821	0.00937109	0.0822597	Gm30238	12	112657420	112660022	-1	predicted gene, 30238 [Source:MGI Symbol;Acc:MGI:5589397]	0.105999
ENSMUSG00000029310	1291.44	-0.174498	0.0671711	-2.59781	0.00938208	0.0823102	Nudt9	5	104194172	104213245	1	nudix (nucleoside diphosphate linked moiety X)-type motif 9 [Source:MGI Symbol;Acc:MGI:1921417]	0.106066
ENSMUSG00000028228	4244.67	-0.152349	0.0586818	-2.5962	0.00942621	0.0826514	Cpne3	4	19519254	19570108	-1	copine III [Source:MGI Symbol;Acc:MGI:1917818]	0.106508
ENSMUSG00000062647	4853.24	-0.165095	0.0636249	-2.59482	0.00946413	0.0829376	Rpl7a	2	26800776	26803330	1	ribosomal protein L7A [Source:MGI Symbol;Acc:MGI:1353472]	0.106879
ENSMUSG00000025586	6683.57	0.119895	0.0462157	2.59424	0.00947997	0.0830302	Cpeb1	7	80996774	81105213	-1	cytoplasmic polyadenylation element binding protein 1 [Source:MGI Symbol;Acc:MGI:108442]	0.107001
ENSMUSG00000028070	1255.48	-0.18783	0.0724144	-2.59383	0.00949144	0.083067	Naxe	3	87963827	87965802	-1	NAD(P)HX epimerase [Source:MGI Symbol;Acc:MGI:2180167]	0.107052
ENSMUSG00000003382	907.437	0.202827	0.0781996	2.59371	0.00949473	0.083067	Etv3	3	87432714	87447463	1	ets variant 3 [Source:MGI Symbol;Acc:MGI:1350926]	0.107052
ENSMUSG00000019359	119.357	0.624115	0.240672	2.59321	0.00950837	0.0831402	Gdpd2	X	99773479	99782501	1	glycerophosphodiester phosphodiesterase domain containing 2 [Source:MGI Symbol;Acc:MGI:1918834]	0.107149
ENSMUSG00000030310	177.118	0.454838	0.175444	2.59249	0.0095284	0.0832261	Slc6a1	6	114259596	114294493	1	solute carrier family 6 (neurotransmitter transporter, GABA), member 1 [Source:MGI Symbol;Acc:MGI:95627]	0.107264
ENSMUSG00000019852	5322.7	-0.235874	0.090984	-2.59248	0.00952878	0.0832261	Arfgef3	10	18457587	18619697	-1	ARFGEF family member 3 [Source:MGI Symbol;Acc:MGI:106387]	0.107264
ENSMUSG00000050737	354.091	-0.484486	0.186975	-2.59119	0.00956457	0.0834924	Ptges	2	30779483	30819875	-1	prostaglandin E synthase [Source:MGI Symbol;Acc:MGI:1927593]	0.107571
ENSMUSG00000035933	1483.47	-0.155384	0.0599732	-2.59088	0.00957297	0.0835039	Cog5	12	31704868	31987629	1	component of oligomeric golgi complex 5 [Source:MGI Symbol;Acc:MGI:2145130]	0.107571
ENSMUSG00000086889	6.33562	2.33149	0.899907	2.59081	0.00957496	NA	Phf2os1	13	49024588	49028936	1	PHD finger protein 2, opposite strand 1 [Source:MGI Symbol;Acc:MGI:3645592]	0.107571
ENSMUSG00000025036	99.6922	0.652609	0.251899	2.59076	0.0095765	0.0835039	Sfxn2	19	46561804	46586505	1	sideroflexin 2 [Source:MGI Symbol;Acc:MGI:2137678]	0.107571
ENSMUSG00000042078	2973.74	-0.130643	0.0504359	-2.59028	0.00958978	0.0835734	Svop	5	114164971	114229631	-1	SV2 related protein [Source:MGI Symbol;Acc:MGI:1915916]	0.107662
ENSMUSG00000037060	514.041	-0.25718	0.0992994	-2.58995	0.00959903	0.0836077	Cavin3	7	105129290	105131507	-1	caveolae associated 3 [Source:MGI Symbol;Acc:MGI:1923422]	0.107709
ENSMUSG00000040414	541.94	0.230345	0.0889587	2.58935	0.00961584	0.0836262	Slc25a28	19	43652240	43663320	-1	solute carrier family 25, member 28 [Source:MGI Symbol;Acc:MGI:2180509]	0.107741
ENSMUSG00000037876	1018.72	0.297372	0.114853	2.58916	0.00962117	0.0836262	Jmjd1c	10	66931904	67092105	1	jumonji domain containing 1C [Source:MGI Symbol;Acc:MGI:1918614]	0.107741
ENSMUSG00000007739	3521.58	-0.139161	0.0537476	-2.58915	0.00962138	0.0836262	Cct4	11	22940519	22953780	1	chaperonin containing Tcp1, subunit 4 (delta) [Source:MGI Symbol;Acc:MGI:104689]	0.107741
ENSMUSG00000058546	3300.6	-0.144721	0.0558959	-2.58911	0.00962241	0.0836262	Rpl23a	11	78071758	78074410	-1	ribosomal protein L23A [Source:MGI Symbol;Acc:MGI:3040672]	0.107741
ENSMUSG00000059991	2786.78	-0.302976	0.117075	-2.58789	0.00965671	0.0838634	Nptx2	5	144482712	144494288	1	neuronal pentraxin 2 [Source:MGI Symbol;Acc:MGI:1858209]	0.108051
ENSMUSG00000019210	7959.57	-0.13797	0.0533165	-2.58776	0.00966036	0.0838634	Atp6v1e1	6	120771266	120799754	-1	ATPase, H+ transporting, lysosomal V1 subunit E1 [Source:MGI Symbol;Acc:MGI:894326]	0.108051
ENSMUSG00000064125	71.3243	0.778464	0.300884	2.58726	0.0096744	0.083939	Prr36	8	4259543	4267459	-1	proline rich 36 [Source:MGI Symbol;Acc:MGI:3605626]	0.108151
ENSMUSG00000025880	127.569	0.542451	0.209732	2.5864	0.0096985	0.0841017	Smad7	18	75500600	75529006	1	SMAD family member 7 [Source:MGI Symbol;Acc:MGI:1100518]	0.108363
ENSMUSG00000067916	466.855	-0.268003	0.103648	-2.58571	0.00971791	0.0841168	Zfp991	4	147216495	147265036	1	zinc finger protein 991 [Source:MGI Symbol;Acc:MGI:3701604]	0.108391
ENSMUSG00000064284	257.267	-0.321049	0.124163	-2.5857	0.00971809	0.0841168	Cdpf1	15	85691173	85695898	-1	cysteine rich, DPF motif domain containing 1 [Source:MGI Symbol;Acc:MGI:1919605]	0.108391
ENSMUSG00000063787	411.948	-0.322257	0.124633	-2.58564	0.00971993	0.0841168	Chchd1	14	20753074	20754493	1	coiled-coil-helix-coiled-coil-helix domain containing 1 [Source:MGI Symbol;Acc:MGI:1913371]	0.108391
ENSMUSG00000027346	2473.38	0.213427	0.0825451	2.58558	0.00972162	0.0841168	Gpcpd1	2	132371002	132429649	-1	glycerophosphocholine phosphodiesterase 1 [Source:MGI Symbol;Acc:MGI:104898]	0.108391
ENSMUSG00000021520	1124.85	-0.197532	0.0764131	-2.58505	0.00973653	0.0841996	Uqcrb	13	67048681	67053442	-1	ubiquinol-cytochrome c reductase binding protein [Source:MGI Symbol;Acc:MGI:1914780]	0.108499
ENSMUSG00000048502	90.9324	0.685281	0.265167	2.58434	0.00975664	0.0843271	Duxbl1	14	25979001	25990512	1	double homeobox B-like 1 [Source:MGI Symbol;Acc:MGI:1916048]	0.108666
ENSMUSG00000020962	1026.01	-0.177894	0.0688585	-2.58347	0.00978117	0.0844928	Gtf2a1	12	91522036	91557261	-1	general transcription factor II A, 1 [Source:MGI Symbol;Acc:MGI:1933277]	0.108881
ENSMUSG00000022551	4084.58	-0.157077	0.0608098	-2.58309	0.00979193	0.0845393	Cyc1	15	76227723	76230460	1	cytochrome c-1 [Source:MGI Symbol;Acc:MGI:1913695]	0.108944
ENSMUSG00000031278	2781.3	-0.140576	0.0544431	-2.58207	0.00982096	0.0847435	Acsl4	X	141100989	141173531	-1	acyl-CoA synthetase long-chain family member 4 [Source:MGI Symbol;Acc:MGI:1354713]	0.109209
ENSMUSG00000029360	9.86701	2.24041	0.867818	2.58166	0.00983272	NA	Gm9754	5	118203425	118207775	1	predicted gene 9754 [Source:MGI Symbol;Acc:MGI:3704256]	0.109282
ENSMUSG00000105700	4.59007	2.96864	1.15011	2.58117	0.00984674	NA	Gm42772	5	49566134	49569174	-1	predicted gene 42772 [Source:MGI Symbol;Acc:MGI:5662909]	0.109354
ENSMUSG00000064585	3.614	4.09717	1.5874	2.58106	0.00984961	NA	Gm25129	2	158221454	158221586	1	predicted gene, 25129 [Source:MGI Symbol;Acc:MGI:5454906]	0.109354
ENSMUSG00000006717	708.254	-0.233878	0.0906241	-2.58075	0.00985868	0.0850224	Acot13	13	25001931	25015523	-1	acyl-CoA thioesterase 13 [Source:MGI Symbol;Acc:MGI:1914084]	0.109397
ENSMUSG00000031953	295.265	0.319851	0.123963	2.58021	0.00987389	0.0851069	Tmem170	8	112589670	112603382	-1	transmembrane protein 170 [Source:MGI Symbol;Acc:MGI:106426]	0.109508
ENSMUSG00000024764	318.43	0.369317	0.143181	2.57938	0.00989788	0.0852669	Naa40	19	7203033	7218548	-1	N(alpha)-acetyltransferase 40, NatD catalytic subunit [Source:MGI Symbol;Acc:MGI:1918249]	0.109716
ENSMUSG00000032595	11.3659	1.96386	0.761569	2.5787	0.00991736	NA	Cdhr4	9	107869696	107876883	1	cadherin-related family member 4 [Source:MGI Symbol;Acc:MGI:1916648]	0.109874
ENSMUSG00000033644	62.3856	0.678054	0.262981	2.57834	0.00992764	0.0854599	Piwil2	14	70609926	70666832	-1	piwi-like RNA-mediated gene silencing 2 [Source:MGI Symbol;Acc:MGI:1930036]	0.109911
ENSMUSG00000023236	1688.86	-0.207797	0.0805972	-2.57822	0.00993114	0.0854599	Scg5	2	113606707	113659466	-1	secretogranin V [Source:MGI Symbol;Acc:MGI:98289]	0.109911
ENSMUSG00000044465	1206.6	0.215818	0.0837326	2.57747	0.00995272	0.0855988	Fam160a2	7	105020418	105049261	-1	family with sequence similarity 160, member A2 [Source:MGI Symbol;Acc:MGI:1921599]	0.110092
ENSMUSG00000060579	163.758	-0.444961	0.172655	-2.57717	0.0099613	0.0856258	Fhit	14	11307738	12919681	1	fragile histidine triad gene [Source:MGI Symbol;Acc:MGI:1277947]	0.110129
ENSMUSG00000045948	822.425	-0.192473	0.0746972	-2.57671	0.00997469	0.0856942	Mrps12	7	28439066	28441245	-1	mitochondrial ribosomal protein S12 [Source:MGI Symbol;Acc:MGI:1346333]	0.110219
ENSMUSG00000074576	227	-0.348395	0.135278	-2.57541	0.0100122	0.0859458	Mocs3	2	168072542	168074514	1	molybdenum cofactor synthesis 3 [Source:MGI Symbol;Acc:MGI:1916622]	0.110548
ENSMUSG00000004661	142.56	0.523539	0.203291	2.57531	0.0100149	0.0859458	Arid3b	9	57697636	57744076	-1	AT rich interactive domain 3B (BRIGHT-like) [Source:MGI Symbol;Acc:MGI:1930768]	0.110548
ENSMUSG00000026288	77.7182	1.23795	0.480745	2.57507	0.0100219	0.0859594	Inpp5d	1	87548034	87648229	1	inositol polyphosphate-5-phosphatase D [Source:MGI Symbol;Acc:MGI:107357]	0.110567
ENSMUSG00000096727	102.261	-0.651302	0.253123	-2.57306	0.0100804	0.0864136	Psmb9	17	34400961	34406738	-1	proteasome (prosome, macropain) subunit, beta type 9 (large multifunctional peptidase 2) [Source:MGI Symbol;Acc:MGI:1346526]	0.111151
ENSMUSG00000079645	4.97858	2.6464	1.02857	2.57289	0.0100854	NA	Gm17193	12	84969316	84970286	-1	predicted gene 17193 [Source:MGI Symbol;Acc:MGI:4938020]	0.111151
ENSMUSG00000040774	1216.63	-0.176165	0.068486	-2.57227	0.0101033	0.086516	Cept1	3	106409576	106455118	-1	choline/ethanolaminephosphotransferase 1 [Source:MGI Symbol;Acc:MGI:2139793]	0.111232
ENSMUSG00000032412	7945.24	-0.203184	0.0789902	-2.57227	0.0101033	0.086516	Atp1b3	9	96214708	96246495	-1	ATPase, Na+/K+ transporting, beta 3 polypeptide [Source:MGI Symbol;Acc:MGI:107788]	0.111232
ENSMUSG00000014294	1177.99	-0.219953	0.0855439	-2.57123	0.0101338	0.0867295	Ndufa2	18	36875385	36877610	-1	NADH:ubiquinone oxidoreductase subunit A2 [Source:MGI Symbol;Acc:MGI:1343103]	0.111509
ENSMUSG00000040158	647.108	-0.289717	0.112697	-2.57077	0.0101472	0.0867775	Tax1bp3	11	73067909	73073988	1	Tax1 (human T cell leukemia virus type I) binding protein 3 [Source:MGI Symbol;Acc:MGI:1923531]	0.111575
ENSMUSG00000005268	229.695	-0.443204	0.172409	-2.57066	0.0101504	0.0867775	Prlr	15	10177324	10349266	1	prolactin receptor [Source:MGI Symbol;Acc:MGI:97763]	0.111575
ENSMUSG00000030037	561.907	-0.276901	0.107738	-2.57014	0.0101659	0.0868386	Mrpl53	6	83086021	83086920	1	mitochondrial ribosomal protein L53 [Source:MGI Symbol;Acc:MGI:1915749]	0.111674
ENSMUSG00000043445	2609.77	-0.131808	0.05129	-2.56986	0.010174	0.0868386	Pgp	17	24689366	24692084	1	phosphoglycolate phosphatase [Source:MGI Symbol;Acc:MGI:1914328]	0.111674
ENSMUSG00000029311	2264.09	-0.206466	0.0803497	-2.56959	0.0101818	0.0868386	Hsd17b11	5	104137628	104169785	-1	hydroxysteroid (17-beta) dehydrogenase 11 [Source:MGI Symbol;Acc:MGI:2149821]	0.111674
ENSMUSG00000022995	8339.8	0.196953	0.0766568	2.56928	0.0101909	0.0868386	Enah	1	181723949	181847555	-1	ENAH actin regulator [Source:MGI Symbol;Acc:MGI:108360]	0.111674
ENSMUSG00000026463	1703.52	-0.253312	0.0986027	-2.56901	0.0101988	0.0868386	Atp2b4	1	133627195	133728779	-1	ATPase, Ca++ transporting, plasma membrane 4 [Source:MGI Symbol;Acc:MGI:88111]	0.111674
ENSMUSG00000059070	2150.42	-0.181903	0.0708071	-2.569	0.0101994	0.0868386	Rpl18	7	45364881	45370260	1	ribosomal protein L18 [Source:MGI Symbol;Acc:MGI:98003]	0.111674
ENSMUSG00000025794	4348.69	-0.178821	0.0696128	-2.56879	0.0102054	0.0868386	Rpl14	9	120400510	120403720	1	ribosomal protein L14 [Source:MGI Symbol;Acc:MGI:1914365]	0.111674
ENSMUSG00000043463	1229.92	-0.17047	0.0663621	-2.56878	0.0102057	0.0868386	Rab9b	X	135758896	135769504	-1	RAB9B, member RAS oncogene family [Source:MGI Symbol;Acc:MGI:2442454]	0.111674
ENSMUSG00000029446	436.454	-0.277568	0.108056	-2.56873	0.0102072	0.0868386	Psph	5	129842622	129864513	-1	phosphoserine phosphatase [Source:MGI Symbol;Acc:MGI:97788]	0.111674
ENSMUSG00000007021	5169.84	-0.176855	0.0688946	-2.56703	0.0102573	0.0872177	Syngr3	17	24904066	24908929	-1	synaptogyrin 3 [Source:MGI Symbol;Acc:MGI:1341881]	0.112164
ENSMUSG00000040274	288.047	0.599131	0.233497	2.56591	0.0102905	0.0874528	Cdk6	5	3391485	3581008	1	cyclin-dependent kinase 6 [Source:MGI Symbol;Acc:MGI:1277162]	0.112469
ENSMUSG00000004771	6609.64	-0.141628	0.0552004	-2.56571	0.0102965	0.0874567	Rab11a	9	64622581	64645040	-1	RAB11A, member RAS oncogene family [Source:MGI Symbol;Acc:MGI:1858202]	0.112476
ENSMUSG00000023110	1436.94	-0.182074	0.0709719	-2.56544	0.0103044	0.0874712	Prmt5	14	54744644	54754982	-1	protein arginine N-methyltransferase 5 [Source:MGI Symbol;Acc:MGI:1351645]	0.112499
ENSMUSG00000036257	1934.08	-0.157123	0.0612501	-2.56528	0.0103094	0.0874712	Pnpla8	12	44268153	44369315	1	patatin-like phospholipase domain containing 8 [Source:MGI Symbol;Acc:MGI:1914702]	0.112499
ENSMUSG00000029642	1241.22	-0.210028	0.0818857	-2.56489	0.0103207	0.0875203	Polr1d	5	147013860	147048407	1	polymerase (RNA) I polypeptide D [Source:MGI Symbol;Acc:MGI:108403]	0.112565
ENSMUSG00000043833	44.5853	1.03011	0.401687	2.56446	0.0103337	0.0875835	2900005J15Rik	5	25305981	25315107	1	RIKEN cDNA 2900005J15 gene [Source:MGI Symbol;Acc:MGI:1914511]	0.112648
ENSMUSG00000038721	225.335	-0.337269	0.131537	-2.56406	0.0103454	0.0876355	Hoxb7	11	96177449	96180988	1	homeobox B7 [Source:MGI Symbol;Acc:MGI:96188]	0.112718
ENSMUSG00000022400	3359.7	-0.166269	0.0648684	-2.56318	0.0103719	0.0878125	Rbx1	15	81350497	81360570	1	ring-box 1 [Source:MGI Symbol;Acc:MGI:1891829]	0.112948
ENSMUSG00000032815	77.8186	0.819507	0.319959	2.56129	0.0104284	0.0882435	Fanca	8	123995039	124045315	-1	Fanconi anemia, complementation group A [Source:MGI Symbol;Acc:MGI:1341823]	0.113504
ENSMUSG00000003420	435.005	-0.283866	0.110919	-2.55923	0.0104905	0.0887107	Fcgrt	7	44742414	44753275	-1	Fc fragment of IgG receptor and transporter [Source:MGI Symbol;Acc:MGI:103017]	0.11411
ENSMUSG00000026456	3357.12	-0.172153	0.0672713	-2.55908	0.0104949	0.0887107	Cyb5r1	1	134333297	134339478	1	cytochrome b5 reductase 1 [Source:MGI Symbol;Acc:MGI:1919267]	0.11411
ENSMUSG00000068758	90.5083	0.624726	0.244149	2.55879	0.0105036	0.088737	Il3ra	14	8113752	8123488	-1	interleukin 3 receptor, alpha chain [Source:MGI Symbol;Acc:MGI:96553]	0.114146
ENSMUSG00000028073	362.809	0.387095	0.151295	2.55854	0.0105112	0.0887532	Pear1	3	87655197	87731613	-1	platelet endothelial aggregation receptor 1 [Source:MGI Symbol;Acc:MGI:1920432]	0.114169
ENSMUSG00000025439	1185.09	-0.208241	0.0814019	-2.55818	0.0105222	0.0887833	Clns1a	7	97345841	97370003	1	chloride channel, nucleotide-sensitive, 1A [Source:MGI Symbol;Acc:MGI:109638]	0.114212
ENSMUSG00000048763	167.888	0.542	0.21188	2.55805	0.0105261	0.0887833	Hoxb3	11	96214152	96238756	1	homeobox B3 [Source:MGI Symbol;Acc:MGI:96184]	0.114212
ENSMUSG00000020739	569.006	0.32127	0.125614	2.5576	0.0105397	0.0888505	Nup85	11	115455260	115474811	1	nucleoporin 85 [Source:MGI Symbol;Acc:MGI:3046173]	0.114301
ENSMUSG00000008892	4357.18	-0.140519	0.0549906	-2.55534	0.0106085	0.0893825	Vdac3	8	23067091	23083829	-1	voltage-dependent anion channel 3 [Source:MGI Symbol;Acc:MGI:106922]	0.114988
ENSMUSG00000031917	267.526	-0.383711	0.150194	-2.55477	0.0106258	0.0894579	Nip7	8	107783509	107787563	1	NIP7, nucleolar pre-rRNA processing protein [Source:MGI Symbol;Acc:MGI:1913414]	0.115092
ENSMUSG00000024121	12686.3	-0.12473	0.0488248	-2.55464	0.0106296	0.0894579	Atp6v0c	17	24382840	24388676	-1	ATPase, H+ transporting, lysosomal V0 subunit C [Source:MGI Symbol;Acc:MGI:88116]	0.115092
ENSMUSG00000022261	623.691	-0.233963	0.0915892	-2.55449	0.0106345	0.0894579	Sdc2	15	32920869	33035081	1	syndecan 2 [Source:MGI Symbol;Acc:MGI:1349165]	0.115092
ENSMUSG00000014349	4877.59	-0.138561	0.0542576	-2.55376	0.0106566	0.0895963	Ube2z	11	95938258	95956214	-1	ubiquitin-conjugating enzyme E2Z [Source:MGI Symbol;Acc:MGI:1343160]	0.115272
ENSMUSG00000025351	1663	-0.328061	0.128476	-2.55349	0.0106651	0.0896195	Cd63	10	128736858	128748691	1	CD63 antigen [Source:MGI Symbol;Acc:MGI:99529]	0.115304
ENSMUSG00000033063	415.574	-0.308227	0.120731	-2.55301	0.0106796	0.0896845	Cntnap3	13	64883996	65051769	-1	contactin associated protein-like 3 [Source:MGI Symbol;Acc:MGI:3588199]	0.115393
ENSMUSG00000041846	534.082	0.284786	0.111555	2.55286	0.0106842	0.0896845	Ppp4r3a	12	101005668	101049961	-1	protein phosphatase 4 regulatory subunit 3A [Source:MGI Symbol;Acc:MGI:1915984]	0.115393
ENSMUSG00000042807	442.617	-0.425607	0.166762	-2.55219	0.0107049	0.0898106	Hecw2	1	53846035	54234327	-1	HECT, C2 and WW domain containing E3 ubiquitin protein ligase 2 [Source:MGI Symbol;Acc:MGI:2685817]	0.115557
ENSMUSG00000042380	1363.41	-0.200098	0.0784142	-2.55181	0.0107165	0.0898328	Smim12	4	127137577	127141602	1	small integral membrane protein 12 [Source:MGI Symbol;Acc:MGI:1933141]	0.11559
ENSMUSG00000051550	299.361	0.528679	0.207185	2.55173	0.010719	0.0898328	Zfp579	7	4986482	4999157	-1	zinc finger protein 579 [Source:MGI Symbol;Acc:MGI:1915740]	0.11559
ENSMUSG00000018427	426.235	0.323878	0.126942	2.55139	0.0107295	0.0898728	Ypel2	11	86827251	86884533	-1	yippee like 2 [Source:MGI Symbol;Acc:MGI:1925114]	0.115644
ENSMUSG00000027889	1765.07	0.19877	0.0779264	2.55073	0.0107496	0.0899936	Ampd2	3	107981378	107993967	-1	adenosine monophosphate deaminase 2 [Source:MGI Symbol;Acc:MGI:88016]	0.115802
ENSMUSG00000026458	2891.98	0.177516	0.0696212	2.54973	0.0107805	0.0902042	Ppfia4	1	134224521	134260666	-1	protein tyrosine phosphatase, receptor type, f polypeptide (PTPRF), interacting protein (liprin), alpha 4 [Source:MGI Symbol;Acc:MGI:1915757]	0.116075
ENSMUSG00000085385	118.369	0.631185	0.247571	2.54951	0.0107874	0.0902145	Snhg17	2	158195620	158203500	-1	small nucleolar RNA host gene 17 [Source:MGI Symbol;Acc:MGI:1915358]	0.116091
ENSMUSG00000041482	13245.6	-0.130312	0.0511166	-2.54931	0.0107936	0.0902177	Piezo2	18	63143284	63520254	-1	piezo-type mechanosensitive ion channel component 2 [Source:MGI Symbol;Acc:MGI:1918781]	0.116097
ENSMUSG00000034683	9917.59	-0.12225	0.0479648	-2.54874	0.0108112	0.0902614	Ppp1r1c	2	79538124	79648840	1	protein phosphatase 1, regulatory inhibitor subunit 1C [Source:MGI Symbol;Acc:MGI:1923185]	0.116162
ENSMUSG00000046330	1773.95	-0.208788	0.081922	-2.54862	0.010815	0.0902614	Rpl37a	1	72750449	72752972	1	ribosomal protein L37a [Source:MGI Symbol;Acc:MGI:98068]	0.116162
ENSMUSG00000105677	13.7114	1.40981	0.5532	2.54846	0.01082	0.0902614	Gm43328	3	105639760	105641193	-1	predicted gene 43328 [Source:MGI Symbol;Acc:MGI:5663465]	0.116162
ENSMUSG00000038729	2338.1	-0.152832	0.0599718	-2.5484	0.0108217	0.0902614	Pakap	4	57717657	57896984	1	paralemmin A kinase anchor protein [Source:MGI Symbol;Acc:MGI:5141924]	0.116162
ENSMUSG00000025289	516.048	-0.2585	0.101444	-2.54821	0.0108278	0.0902642	Prdx4	X	154106914	154123750	-1	peroxiredoxin 4 [Source:MGI Symbol;Acc:MGI:1859815]	0.116168
ENSMUSG00000030298	1682.08	-0.171972	0.067507	-2.54747	0.0108506	0.0904063	Sec13	6	113705023	113717704	-1	SEC13 homolog, nuclear pore and COPII coat complex component [Source:MGI Symbol;Acc:MGI:99832]	0.116353
ENSMUSG00000028467	1025.1	0.215174	0.0845074	2.54622	0.0108897	0.0906609	Gba2	4	43566928	43578873	-1	glucosidase beta 2 [Source:MGI Symbol;Acc:MGI:2654325]	0.116686
ENSMUSG00000031342	7123.98	-0.312332	0.122669	-2.54612	0.0108927	0.0906609	Gpm6b	X	165021907	165171984	1	glycoprotein m6b [Source:MGI Symbol;Acc:MGI:107672]	0.116686
ENSMUSG00000027777	961.419	-0.241514	0.094898	-2.54499	0.0109282	0.0909088	Schip1	3	67972135	68533814	1	schwannomin interacting protein 1 [Source:MGI Symbol;Acc:MGI:1353557]	0.117007
ENSMUSG00000027245	101.286	0.945894	0.371766	2.54433	0.0109488	0.0910319	Hypk	2	121283771	121289153	1	huntingtin interacting protein K [Source:MGI Symbol;Acc:MGI:1914943]	0.117168
ENSMUSG00000105742	5.61142	2.83157	1.11306	2.54395	0.0109607	NA	Gm42748	5	122303660	122306000	1	predicted gene 42748 [Source:MGI Symbol;Acc:MGI:5662885]	0.117235
ENSMUSG00000025130	3544.34	-0.159612	0.0628063	-2.54134	0.011043	0.0917664	P4hb	11	120451124	120464079	-1	prolyl 4-hydroxylase, beta polypeptide [Source:MGI Symbol;Acc:MGI:97464]	0.118056
ENSMUSG00000048644	854.01	-0.289787	0.114046	-2.54096	0.0110548	0.091816	Ctxn1	8	4307660	4309274	-1	cortexin 1 [Source:MGI Symbol;Acc:MGI:88566]	0.118122
ENSMUSG00000027474	13.699	1.61179	0.634386	2.54071	0.0110628	0.0918342	Ccm2l	2	152907875	152923655	1	cerebral cavernous malformation 2-like [Source:MGI Symbol;Acc:MGI:2385159]	0.118148
ENSMUSG00000096210	1824.47	-0.165053	0.0649926	-2.53957	0.0110988	0.0920846	H1f0	15	78912650	78914704	1	H1.0 linker histone [Source:MGI Symbol;Acc:MGI:95893]	0.118472
ENSMUSG00000030287	70.887	0.678458	0.267208	2.53906	0.011115	0.0921704	Itpr2	6	146009797	146403721	-1	inositol 1,4,5-triphosphate receptor 2 [Source:MGI Symbol;Acc:MGI:99418]	0.118575
ENSMUSG00000067547	9.12264	6.48369	2.55373	2.53891	0.0111198	NA	Gm7666	15	6683404	6684222	1	predicted pseudogene 7666 [Source:MGI Symbol;Acc:MGI:3648907]	0.118575
ENSMUSG00000021548	632.298	-0.229867	0.090548	-2.53862	0.011129	0.0922204	Ccnh	13	85337527	85371588	1	cyclin H [Source:MGI Symbol;Acc:MGI:1913921]	0.118594
ENSMUSG00000047227	166.619	0.519009	0.204455	2.5385	0.0111328	0.0922204	Gm527	12	64964680	64971366	1	predicted gene 527 [Source:MGI Symbol;Acc:MGI:2685373]	0.118594
ENSMUSG00000049606	1169.02	0.170098	0.0670189	2.53806	0.0111468	0.092288	Zfp644	5	106764605	106845153	-1	zinc finger protein 644 [Source:MGI Symbol;Acc:MGI:1277212]	0.118683
ENSMUSG00000020282	557.636	0.398933	0.1572	2.53774	0.0111572	0.0923258	Rhbdf1	11	32159585	32172300	-1	rhomboid 5 homolog 1 [Source:MGI Symbol;Acc:MGI:104328]	0.118734
ENSMUSG00000033530	2532.36	0.185055	0.0729504	2.53672	0.0111895	0.0925441	Ttc7b	12	100267029	100487085	-1	tetratricopeptide repeat domain 7B [Source:MGI Symbol;Acc:MGI:2144724]	0.119017
ENSMUSG00000002799	2460.24	0.328851	0.129705	2.53539	0.0112324	0.0928498	Jag2	12	112871439	112893396	-1	jagged 2 [Source:MGI Symbol;Acc:MGI:1098270]	0.119413
ENSMUSG00000085591	6.27443	2.36279	0.932203	2.53463	0.0112565	NA	Gm13479	2	45247277	45294047	1	predicted gene 13479 [Source:MGI Symbol;Acc:MGI:3651869]	0.119553
ENSMUSG00000024426	308.672	0.440003	0.173597	2.53462	0.0112569	0.0930043	Atat1	17	36208487	36220967	-1	alpha tubulin acetyltransferase 1 [Source:MGI Symbol;Acc:MGI:1913869]	0.119553
ENSMUSG00000008475	3649.73	-0.150816	0.0595326	-2.53334	0.0112981	0.0932058	Arpc5	1	152642293	152651348	1	actin related protein 2/3 complex, subunit 5 [Source:MGI Symbol;Acc:MGI:1915021]	0.119777
ENSMUSG00000031934	1806.85	-0.147057	0.0580485	-2.53334	0.0112981	0.0932058	Panx1	9	14913424	14956774	-1	pannexin 1 [Source:MGI Symbol;Acc:MGI:1860055]	0.119777
ENSMUSG00000078765	521.713	-0.228613	0.0902427	-2.53331	0.0112991	0.0932058	U2af1l4	7	30262726	30264790	1	U2 small nuclear RNA auxiliary factor 1-like 4 [Source:MGI Symbol;Acc:MGI:2678374]	0.119777
ENSMUSG00000092212	8.05661	2.10093	0.829338	2.53326	0.0113008	NA	Slc22a13b	9	119049554	119060758	-1	solute carrier family 22 (organic cation transporter), member 13b [Source:MGI Symbol;Acc:MGI:1924762]	0.119777
ENSMUSG00000022556	890.486	0.265929	0.105016	2.53228	0.0113322	0.0933976	Hsf1	15	76361622	76386113	1	heat shock factor 1 [Source:MGI Symbol;Acc:MGI:96238]	0.12001
ENSMUSG00000106874	154.426	0.468245	0.184915	2.53222	0.0113342	0.0933976	Gm20186	6	18845909	18848206	-1	predicted gene, 20186 [Source:MGI Symbol;Acc:MGI:5012371]	0.12001
ENSMUSG00000067995	291.344	-0.295184	0.116624	-2.53107	0.0113715	0.093643	Gtf2f2	14	76134377	76248305	-1	general transcription factor IIF, polypeptide 2 [Source:MGI Symbol;Acc:MGI:1915955]	0.120336
ENSMUSG00000029426	5432.58	-0.118338	0.0467603	-2.53073	0.0113824	0.093643	Scarb2	5	92589173	92654692	-1	scavenger receptor class B, member 2 [Source:MGI Symbol;Acc:MGI:1196458]	0.120336
ENSMUSG00000072582	251.339	-0.328652	0.129867	-2.53068	0.0113843	0.093643	Ptrh2	11	86574811	86583283	1	peptidyl-tRNA hydrolase 2 [Source:MGI Symbol;Acc:MGI:2444848]	0.120336
ENSMUSG00000024347	69.7932	0.772855	0.305408	2.53057	0.0113878	0.093643	Psd2	18	36097883	36147768	1	pleckstrin and Sec7 domain containing 2 [Source:MGI Symbol;Acc:MGI:1921252]	0.120336
ENSMUSG00000046364	1565.61	-0.186189	0.0736124	-2.52932	0.0114284	0.0939278	Rpl27a	7	109118354	109121574	1	ribosomal protein L27A [Source:MGI Symbol;Acc:MGI:1347076]	0.120704
ENSMUSG00000045934	324.334	0.49564	0.195976	2.52908	0.0114362	0.0939428	Mtmr11	3	96069321	96079034	1	myotubularin related protein 11 [Source:MGI Symbol;Acc:MGI:2652817]	0.120726
ENSMUSG00000044712	441.867	0.296818	0.117405	2.52815	0.0114665	0.0941428	Slc38a6	12	73333553	73400823	1	solute carrier family 38, member 6 [Source:MGI Symbol;Acc:MGI:3648156]	0.120985
ENSMUSG00000028854	2645.91	0.171821	0.0680102	2.5264	0.0115239	0.094496	Slc9a1	4	133097017	133151013	1	solute carrier family 9 (sodium/hydrogen exchanger), member 1 [Source:MGI Symbol;Acc:MGI:102462]	0.121451
ENSMUSG00000007892	4393.58	-0.159505	0.0631371	-2.52632	0.0115264	0.094496	Rplp1	9	61820566	61821824	-1	ribosomal protein, large, P1 [Source:MGI Symbol;Acc:MGI:1927099]	0.121451
ENSMUSG00000001627	447.026	0.315442	0.124869	2.52618	0.0115309	0.094496	Ifrd1	12	40251566	40298503	-1	interferon-related developmental regulator 1 [Source:MGI Symbol;Acc:MGI:1316717]	0.121451
ENSMUSG00000037791	595.658	0.428658	0.169698	2.52601	0.0115367	0.094496	Phf12	11	77873580	77921365	1	PHD finger protein 12 [Source:MGI Symbol;Acc:MGI:1924057]	0.121451
ENSMUSG00000047793	350.105	0.604532	0.239331	2.52592	0.0115396	0.094496	Sned1	1	93163563	93228787	1	sushi, nidogen and EGF-like domains 1 [Source:MGI Symbol;Acc:MGI:3045960]	0.121451
[truncated: 19,056 more rows]

## Sheet: GOKEGG UP
Category	GO Number	Term	Count	%	PValue	Genes	List Total	Pop Hits	Pop Total	Fold Enrichment	Bonferroni	Benjamini	FDR
GOTERM_BP_DIRECT	GO:0006397	mRNA processing	49	5.96107	5.53253e-12	ENSMUSG00000015748, ENSMUSG00000027176, ENSMUSG00000029439, ENSMUSG00000028820, ENSMUSG00000022961, ENSMUSG00000020863, ENSMUSG00000024949, ENSMUSG00000039630, ENSMUSG00000034022, ENSMUSG00000035597, ENSMUSG00000018379, ENSMUSG00000059208, ENSMUSG00000034820, ENSMUSG00000007850, ENSMUSG00000004980, ENSMUSG00000027881, ENSMUSG00000022194, ENSMUSG00000025982, ENSMUSG00000029701, ENSMUSG00000023007,…	706	313	13864	3.07422	1.55797e-08	1.55741e-08	1.55077e-08
GOTERM_BP_DIRECT	GO:0008380	RNA splicing	40	4.86618	3.89202e-11	ENSMUSG00000031134, ENSMUSG00000006498, ENSMUSG00000015748, ENSMUSG00000032580, ENSMUSG00000022185, ENSMUSG00000029439, ENSMUSG00000028820, ENSMUSG00000021494, ENSMUSG00000024287, ENSMUSG00000061028, ENSMUSG00000021134, ENSMUSG00000022961, ENSMUSG00000020863, ENSMUSG00000021413, ENSMUSG00000024949, ENSMUSG00000039630, ENSMUSG00000028809, ENSMUSG00000034120, ENSMUSG00000034681, ENSMUSG00000035597,…	706	233	13864	3.37123	1.09599e-07	5.47802e-08	5.45467e-08
GOTERM_BP_DIRECT	GO:0006351	transcription, DNA-templated	145	17.6399	2.23154e-10	ENSMUSG00000028582, ENSMUSG00000054199, ENSMUSG00000038705, ENSMUSG00000028341, ENSMUSG00000029439, ENSMUSG00000005621, ENSMUSG00000008855, ENSMUSG00000021156, ENSMUSG00000029833, ENSMUSG00000027936, ENSMUSG00000022528, ENSMUSG00000024949, ENSMUSG00000094410, ENSMUSG00000022529, ENSMUSG00000017724, ENSMUSG00000018537, ENSMUSG00000018899, ENSMUSG00000079487, ENSMUSG00000038418, ENSMUSG00000036916,…	706	1704	13864	1.67102	6.284e-07	2.09392e-07	2.085e-07
GOTERM_BP_DIRECT	GO:0006355	regulation of transcription, DNA-templated	150	18.2482	3.10921e-07	ENSMUSG00000028582, ENSMUSG00000054199, ENSMUSG00000038705, ENSMUSG00000028341, ENSMUSG00000029439, ENSMUSG00000005621, ENSMUSG00000008855, ENSMUSG00000021156, ENSMUSG00000029833, ENSMUSG00000027936, ENSMUSG00000072501, ENSMUSG00000022528, ENSMUSG00000024949, ENSMUSG00000094410, ENSMUSG00000017724, ENSMUSG00000018537, ENSMUSG00000018899, ENSMUSG00000079487, ENSMUSG00000038418, ENSMUSG00000036916,…	706	1986	13864	1.48319	0.000875171	0.000218811	0.000217878
GOTERM_BP_DIRECT	GO:0006468	protein phosphorylation	53	6.44769	9.47897e-06	ENSMUSG00000031392, ENSMUSG00000027330, ENSMUSG00000027692, ENSMUSG00000042724, ENSMUSG00000028469, ENSMUSG00000028028, ENSMUSG00000025199, ENSMUSG00000068917, ENSMUSG00000020385, ENSMUSG00000026207, ENSMUSG00000029512, ENSMUSG00000029833, ENSMUSG00000028708, ENSMUSG00000021754, ENSMUSG00000018334, ENSMUSG00000020700, ENSMUSG00000024948, ENSMUSG00000105340, ENSMUSG00000018932, ENSMUSG00000026074,…	706	547	13864	1.90271	0.0263398	0.00533666	0.00531391
GOTERM_BP_DIRECT	GO:0000381	regulation of alternative mRNA splicing, via spliceosome	11	1.3382	1.40079e-05	ENSMUSG00000031134, ENSMUSG00000006498, ENSMUSG00000092341, ENSMUSG00000015165, ENSMUSG00000032580, ENSMUSG00000034681, ENSMUSG00000034120, ENSMUSG00000016921, ENSMUSG00000020719, ENSMUSG00000010608, ENSMUSG00000032621	706	38	13864	5.68451	0.0386786	0.00657203	0.00654402
GOTERM_BP_DIRECT	GO:0045944	positive regulation of transcription from RNA polymerase II promoter	74	9.00243	1.85057e-05	ENSMUSG00000028341, ENSMUSG00000071054, ENSMUSG00000025199, ENSMUSG00000040943, ENSMUSG00000008855, ENSMUSG00000027936, ENSMUSG00000026923, ENSMUSG00000022528, ENSMUSG00000017724, ENSMUSG00000031834, ENSMUSG00000038346, ENSMUSG00000018899, ENSMUSG00000019986, ENSMUSG00000079487, ENSMUSG00000029068, ENSMUSG00000053470, ENSMUSG00000038418, ENSMUSG00000053552, ENSMUSG00000025223, ENSMUSG00000024454,…	706	877	13864	1.65698	0.0507779	0.00744192	0.0074102
GOTERM_BP_DIRECT	GO:0045892	negative regulation of transcription, DNA-templated	46	5.59611	2.91612e-05	ENSMUSG00000025050, ENSMUSG00000054199, ENSMUSG00000034748, ENSMUSG00000031392, ENSMUSG00000085795, ENSMUSG00000042207, ENSMUSG00000028820, ENSMUSG00000005566, ENSMUSG00000024325, ENSMUSG00000008855, ENSMUSG00000041215, ENSMUSG00000029833, ENSMUSG00000024968, ENSMUSG00000046962, ENSMUSG00000026923, ENSMUSG00000022528, ENSMUSG00000020889, ENSMUSG00000072244, ENSMUSG00000094410, ENSMUSG00000022529,…	706	468	13864	1.93017	0.0788377	0.0102611	0.0102173
GOTERM_BP_DIRECT	GO:0000122	negative regulation of transcription from RNA polymerase II promoter	57	6.93431	8.92153e-05	ENSMUSG00000028582, ENSMUSG00000028341, ENSMUSG00000059201, ENSMUSG00000028820, ENSMUSG00000028423, ENSMUSG00000021156, ENSMUSG00000008855, ENSMUSG00000024423, ENSMUSG00000044786, ENSMUSG00000020423, ENSMUSG00000026923, ENSMUSG00000022528, ENSMUSG00000094410, ENSMUSG00000018537, ENSMUSG00000030103, ENSMUSG00000004980, ENSMUSG00000038418, ENSMUSG00000024498, ENSMUSG00000024454, ENSMUSG00000072294,…	706	655	13864	1.7089	0.222165	0.0274604	0.0273433
GOTERM_BP_DIRECT	GO:0046777	protein autophosphorylation	23	2.79805	0.000111251	ENSMUSG00000005640, ENSMUSG00000037989, ENSMUSG00000029454, ENSMUSG00000057897, ENSMUSG00000026034, ENSMUSG00000031392, ENSMUSG00000026274, ENSMUSG00000027692, ENSMUSG00000042724, ENSMUSG00000025375, ENSMUSG00000068917, ENSMUSG00000020385, ENSMUSG00000005566, ENSMUSG00000029512, ENSMUSG00000029833, ENSMUSG00000028708, ENSMUSG00000020700, ENSMUSG00000003119, ENSMUSG00000024969, ENSMUSG00000031805,…	706	179	13864	2.52324	0.268971	0.0274604	0.0273433
GOTERM_BP_DIRECT	GO:0035556	intracellular signal transduction	37	4.50122	0.000115197	ENSMUSG00000075590, ENSMUSG00000031133, ENSMUSG00000024186, ENSMUSG00000059201, ENSMUSG00000027692, ENSMUSG00000028469, ENSMUSG00000004677, ENSMUSG00000004952, ENSMUSG00000024006, ENSMUSG00000028708, ENSMUSG00000044786, ENSMUSG00000018334, ENSMUSG00000020700, ENSMUSG00000020888, ENSMUSG00000021219, ENSMUSG00000024969, ENSMUSG00000024948, ENSMUSG00000004815, ENSMUSG00000036246, ENSMUSG00000016933,…	706	366	13864	1.9852	0.277049	0.0274604	0.0273433
GOTERM_BP_DIRECT	GO:0006366	transcription from RNA polymerase II promoter	18	2.18978	0.00011706	ENSMUSG00000031134, ENSMUSG00000037868, ENSMUSG00000029135, ENSMUSG00000038418, ENSMUSG00000003032, ENSMUSG00000052684, ENSMUSG00000015605, ENSMUSG00000021250, ENSMUSG00000003545, ENSMUSG00000025223, ENSMUSG00000060216, ENSMUSG00000052837, ENSMUSG00000020888, ENSMUSG00000018076, ENSMUSG00000029071, ENSMUSG00000038406, ENSMUSG00000030400, ENSMUSG00000072889	706	120	13864	2.94561	0.280832	0.0274604	0.0273433
GOTERM_BP_DIRECT	GO:0043484	regulation of RNA splicing	8	0.973236	0.000310007	ENSMUSG00000007850, ENSMUSG00000003119, ENSMUSG00000026034, ENSMUSG00000063511, ENSMUSG00000068917, ENSMUSG00000020385, ENSMUSG00000032316, ENSMUSG00000022961	706	27	13864	5.81849	0.582351	0.0671283	0.0668422
GOTERM_BP_DIRECT	GO:0045893	positive regulation of transcription, DNA-templated	46	5.59611	0.000401212	ENSMUSG00000031134, ENSMUSG00000053483, ENSMUSG00000055024, ENSMUSG00000029135, ENSMUSG00000055148, ENSMUSG00000015605, ENSMUSG00000024560, ENSMUSG00000055065, ENSMUSG00000028341, ENSMUSG00000021250, ENSMUSG00000023034, ENSMUSG00000005566, ENSMUSG00000025316, ENSMUSG00000029833, ENSMUSG00000026826, ENSMUSG00000026923, ENSMUSG00000022528, ENSMUSG00000020888, ENSMUSG00000020889, ENSMUSG00000041075,…	706	524	13864	1.72389	0.67698	0.0806724	0.0803285
GOTERM_BP_DIRECT	GO:0016310	phosphorylation	50	6.08273	0.00048092	ENSMUSG00000031392, ENSMUSG00000027692, ENSMUSG00000042724, ENSMUSG00000028028, ENSMUSG00000025199, ENSMUSG00000068917, ENSMUSG00000020385, ENSMUSG00000026207, ENSMUSG00000029512, ENSMUSG00000028708, ENSMUSG00000021754, ENSMUSG00000020700, ENSMUSG00000024948, ENSMUSG00000004815, ENSMUSG00000105340, ENSMUSG00000018932, ENSMUSG00000026074, ENSMUSG00000024290, ENSMUSG00000026034, ENSMUSG00000026274,…	706	590	13864	1.66419	0.741949	0.0902526	0.0898679
GOTERM_BP_DIRECT	GO:0000226	microtubule cytoskeleton organization	13	1.58151	0.00106144	ENSMUSG00000030397, ENSMUSG00000001151, ENSMUSG00000028078, ENSMUSG00000027263, ENSMUSG00000033790, ENSMUSG00000065954, ENSMUSG00000022961, ENSMUSG00000000759, ENSMUSG00000028849, ENSMUSG00000039233, ENSMUSG00000024969, ENSMUSG00000021738, ENSMUSG00000033149	706	84	13864	3.03912	0.949743	0.183922	0.183138
GOTERM_BP_DIRECT	GO:0006357	regulation of transcription from RNA polymerase II promoter	33	4.0146	0.00111072	ENSMUSG00000029135, ENSMUSG00000038705, ENSMUSG00000071054, ENSMUSG00000042625, ENSMUSG00000021250, ENSMUSG00000003545, ENSMUSG00000059540, ENSMUSG00000009741, ENSMUSG00000022389, ENSMUSG00000044786, ENSMUSG00000090077, ENSMUSG00000052837, ENSMUSG00000026923, ENSMUSG00000036281, ENSMUSG00000022528, ENSMUSG00000021738, ENSMUSG00000018076, ENSMUSG00000004815, ENSMUSG00000035356, ENSMUSG00000071637,…	706	353	13864	1.83579	0.956261	0.183922	0.183138
GOTERM_BP_DIRECT	GO:0048025	negative regulation of mRNA splicing, via spliceosome	7	0.851582	0.00130509	ENSMUSG00000006498, ENSMUSG00000004980, ENSMUSG00000015165, ENSMUSG00000034681, ENSMUSG00000022185, ENSMUSG00000029439, ENSMUSG00000016921	706	25	13864	5.49847	0.974715	0.204101	0.203231
GOTERM_BP_DIRECT	GO:0035023	regulation of Rho protein signal transduction	12	1.45985	0.00169395	ENSMUSG00000044037, ENSMUSG00000031442, ENSMUSG00000032356, ENSMUSG00000019467, ENSMUSG00000004562, ENSMUSG00000031133, ENSMUSG00000022263, ENSMUSG00000004677, ENSMUSG00000037552, ENSMUSG00000014782, ENSMUSG00000025555, ENSMUSG00000040940	706	77	13864	3.06037	0.991555	0.250972	0.249902
GOTERM_BP_DIRECT	GO:0007265	Ras protein signal transduction	9	1.09489	0.00231998	ENSMUSG00000032267, ENSMUSG00000018334, ENSMUSG00000029454, ENSMUSG00000021701, ENSMUSG00000052684, ENSMUSG00000105340, ENSMUSG00000005566, ENSMUSG00000029512, ENSMUSG00000067629, ENSMUSG00000035711	706	47	13864	3.76035	0.998556	0.31269	0.311357
GOTERM_BP_DIRECT	GO:0010669	epithelial structure maintenance	4	0.486618	0.00233268	ENSMUSG00000022865, ENSMUSG00000015605, ENSMUSG00000025223, ENSMUSG00000040860	706	6	13864	13.0916	0.998607	0.31269	0.311357
GOTERM_BP_DIRECT	GO:0001701	in utero embryonic development	26	3.16302	0.00249862	ENSMUSG00000055148, ENSMUSG00000024163, ENSMUSG00000015605, ENSMUSG00000004931, ENSMUSG00000005566, ENSMUSG00000026207, ENSMUSG00000023951, ENSMUSG00000052837, ENSMUSG00000026923, ENSMUSG00000022528, ENSMUSG00000018537, ENSMUSG00000016933, ENSMUSG00000054611, ENSMUSG00000018379, ENSMUSG00000039834, ENSMUSG00000030400, ENSMUSG00000001151, ENSMUSG00000028894, ENSMUSG00000022150, ENSMUSG00000021268,…	706	268	13864	1.90512	0.999128	0.31971	0.318347
GOTERM_BP_DIRECT	GO:0071277	cellular response to calcium ion	9	1.09489	0.00304324	ENSMUSG00000057378, ENSMUSG00000052837, ENSMUSG00000009292, ENSMUSG00000052684, ENSMUSG00000021250, ENSMUSG00000003545, ENSMUSG00000004952, ENSMUSG00000030536, ENSMUSG00000022212	706	49	13864	3.60687	0.999813	0.372466	0.370878
GOTERM_BP_DIRECT	GO:0051726	regulation of cell cycle	14	1.70316	0.00325286	ENSMUSG00000033862, ENSMUSG00000000184, ENSMUSG00000052684, ENSMUSG00000059201, ENSMUSG00000085795, ENSMUSG00000028820, ENSMUSG00000002496, ENSMUSG00000061589, ENSMUSG00000021134, ENSMUSG00000022961, ENSMUSG00000052837, ENSMUSG00000032968, ENSMUSG00000055866, ENSMUSG00000015312	706	108	13864	2.54559	0.999896	0.381534	0.379907
GOTERM_BP_DIRECT	GO:0016569	covalent chromatin modification	25	3.04136	0.0035186	ENSMUSG00000053483, ENSMUSG00000042207, ENSMUSG00000040943, ENSMUSG00000005566, ENSMUSG00000024325, ENSMUSG00000021156, ENSMUSG00000025316, ENSMUSG00000008855, ENSMUSG00000025138, ENSMUSG00000018476, ENSMUSG00000034160, ENSMUSG00000041096, ENSMUSG00000054611, ENSMUSG00000053470, ENSMUSG00000059851, ENSMUSG00000031161, ENSMUSG00000024392, ENSMUSG00000006307, ENSMUSG00000024454, ENSMUSG00000038080,…	706	260	13864	1.88821	0.999951	0.396195	0.394506
GOTERM_BP_DIRECT	GO:0060271	cilium morphogenesis	18	2.18978	0.00440519	ENSMUSG00000033335, ENSMUSG00000001151, ENSMUSG00000028795, ENSMUSG00000023473, ENSMUSG00000021013, ENSMUSG00000025008, ENSMUSG00000022621, ENSMUSG00000020776, ENSMUSG00000042156, ENSMUSG00000026923, ENSMUSG00000039781, ENSMUSG00000038593, ENSMUSG00000036057, ENSMUSG00000038564, ENSMUSG00000031328, ENSMUSG00000032558, ENSMUSG00000031755, ENSMUSG00000019986	706	165	13864	2.14226	0.999996	0.476946	0.474913
GOTERM_BP_DIRECT	GO:0000398	mRNA splicing, via spliceosome	13	1.58151	0.00471975	ENSMUSG00000004980, ENSMUSG00000027981, ENSMUSG00000015748, ENSMUSG00000025982, ENSMUSG00000063511, ENSMUSG00000021494, ENSMUSG00000024422, ENSMUSG00000023007, ENSMUSG00000024949, ENSMUSG00000028809, ENSMUSG00000109378, ENSMUSG00000039148, ENSMUSG00000059208	706	100	13864	2.55286	0.999998	0.492078	0.48998
GOTERM_BP_DIRECT	GO:0009416	response to light stimulus	6	0.729927	0.00524954	ENSMUSG00000033335, ENSMUSG00000024190, ENSMUSG00000039176, ENSMUSG00000021250, ENSMUSG00000020893, ENSMUSG00000030103	706	23	13864	5.1228	1	0.527766	0.525516
GOTERM_BP_DIRECT	GO:0000380	alternative mRNA splicing, via spliceosome	5	0.608273	0.00577118	ENSMUSG00000029439, ENSMUSG00000028820, ENSMUSG00000016921, ENSMUSG00000018379, ENSMUSG00000059208	706	15	13864	6.5458	1	0.541529	0.53922
GOTERM_BP_DIRECT	GO:0006376	mRNA splice site selection	5	0.608273	0.00577118	ENSMUSG00000031134, ENSMUSG00000020863, ENSMUSG00000029823, ENSMUSG00000016921, ENSMUSG00000024188	706	15	13864	6.5458	1	0.541529	0.53922
GOTERM_BP_DIRECT	GO:0007623	circadian rhythm	12	1.45985	0.0108915	ENSMUSG00000055024, ENSMUSG00000052684, ENSMUSG00000020889, ENSMUSG00000053907, ENSMUSG00000059201, ENSMUSG00000024454, ENSMUSG00000020719, ENSMUSG00000028957, ENSMUSG00000020893, ENSMUSG00000059824, ENSMUSG00000055866, ENSMUSG00000030103	706	98	13864	2.40458	1	0.989023	0.984807
GOTERM_BP_DIRECT	GO:0006283	transcription-coupled nucleotide-excision repair	4	0.486618	0.01201	ENSMUSG00000022710, ENSMUSG00000037355, ENSMUSG00000054051, ENSMUSG00000030400	706	10	13864	7.85496	1	1	0.996091
GOTERM_BP_DIRECT	GO:0060765	regulation of androgen receptor signaling pathway	4	0.486618	0.01201	ENSMUSG00000055024, ENSMUSG00000042625, ENSMUSG00000020719, ENSMUSG00000060216	706	10	13864	7.85496	1	1	0.996091
GOTERM_BP_DIRECT	GO:0044344	cellular response to fibroblast growth factor stimulus	6	0.729927	0.0124374	ENSMUSG00000021127, ENSMUSG00000044786, ENSMUSG00000033730, ENSMUSG00000042207, ENSMUSG00000030536, ENSMUSG00000023034	706	28	13864	4.20801	1	1	0.996091
GOTERM_BP_DIRECT	GO:0009791	post-embryonic development	12	1.45985	0.0125733	ENSMUSG00000026826, ENSMUSG00000024163, ENSMUSG00000039233, ENSMUSG00000055065, ENSMUSG00000033253, ENSMUSG00000042207, ENSMUSG00000032737, ENSMUSG00000040943, ENSMUSG00000032515, ENSMUSG00000074733, ENSMUSG00000021268, ENSMUSG00000030400	706	100	13864	2.35649	1	1	0.996091
GOTERM_BP_DIRECT	GO:0032868	response to insulin	9	1.09489	0.0140523	ENSMUSG00000037868, ENSMUSG00000038418, ENSMUSG00000031808, ENSMUSG00000034160, ENSMUSG00000059201, ENSMUSG00000032737, ENSMUSG00000016921, ENSMUSG00000021134, ENSMUSG00000040136	706	63	13864	2.80534	1	1	0.996091
GOTERM_BP_DIRECT	GO:0007256	activation of JNKK activity	3	0.364964	0.0144663	ENSMUSG00000027692, ENSMUSG00000033902, ENSMUSG00000054051	706	4	13864	14.728	1	1	0.996091
GOTERM_BP_DIRECT	GO:0071376	cellular response to corticotropin-releasing hormone stimulus	3	0.364964	0.0144663	ENSMUSG00000026826, ENSMUSG00000028341, ENSMUSG00000023034	706	4	13864	14.728	1	1	0.996091
GOTERM_BP_DIRECT	GO:0030030	cell projection organization	15	1.82482	0.0149414	ENSMUSG00000030397, ENSMUSG00000028795, ENSMUSG00000002496, ENSMUSG00000040860, ENSMUSG00000021013, ENSMUSG00000025008, ENSMUSG00000025401, ENSMUSG00000002486, ENSMUSG00000020776, ENSMUSG00000039781, ENSMUSG00000038593, ENSMUSG00000036057, ENSMUSG00000031328, ENSMUSG00000031755, ENSMUSG00000019986	706	144	13864	2.04556	1	1	0.996091
GOTERM_BP_DIRECT	GO:0060213	positive regulation of nuclear-transcribed mRNA poly(A) tail shortening	4	0.486618	0.0204094	ENSMUSG00000052707, ENSMUSG00000020423, ENSMUSG00000044786, ENSMUSG00000025571	706	12	13864	6.5458	1	1	0.996091
GOTERM_BP_DIRECT	GO:0035278	miRNA mediated inhibition of translation	4	0.486618	0.0204094	ENSMUSG00000052707, ENSMUSG00000044786, ENSMUSG00000025571, ENSMUSG00000042500	706	12	13864	6.5458	1	1	0.996091
GOTERM_BP_DIRECT	GO:0032784	regulation of DNA-templated transcription, elongation	4	0.486618	0.0204094	ENSMUSG00000025223, ENSMUSG00000059540, ENSMUSG00000054051, ENSMUSG00000024287	706	12	13864	6.5458	1	1	0.996091
GOTERM_BP_DIRECT	GO:0090051	negative regulation of cell migration involved in sprouting angiogenesis	4	0.486618	0.0204094	ENSMUSG00000026923, ENSMUSG00000003032, ENSMUSG00000016128, ENSMUSG00000008855	706	12	13864	6.5458	1	1	0.996091
GOTERM_BP_DIRECT	GO:0051591	response to cAMP	7	0.851582	0.0230103	ENSMUSG00000024190, ENSMUSG00000052837, ENSMUSG00000052684, ENSMUSG00000053907, ENSMUSG00000021250, ENSMUSG00000003545, ENSMUSG00000020893	706	44	13864	3.12413	1	1	0.996091
GOTERM_BP_DIRECT	GO:0051304	chromosome separation	3	0.364964	0.0233025	ENSMUSG00000020752, ENSMUSG00000038252, ENSMUSG00000035024	706	5	13864	11.7824	1	1	0.996091
GOTERM_BP_DIRECT	GO:0048511	rhythmic process	13	1.58151	0.0252862	ENSMUSG00000055024, ENSMUSG00000042207, ENSMUSG00000028820, ENSMUSG00000028957, ENSMUSG00000020893, ENSMUSG00000022389, ENSMUSG00000034160, ENSMUSG00000039630, ENSMUSG00000020889, ENSMUSG00000109378, ENSMUSG00000020719, ENSMUSG00000059824, ENSMUSG00000030103	706	125	13864	2.04229	1	1	0.996091
GOTERM_BP_DIRECT	GO:0030183	B cell differentiation	7	0.851582	0.025448	ENSMUSG00000054199, ENSMUSG00000055024, ENSMUSG00000026648, ENSMUSG00000031805, ENSMUSG00000008855, ENSMUSG00000022475, ENSMUSG00000020474	706	45	13864	3.05471	1	1	0.996091
GOTERM_BP_DIRECT	GO:2000737	negative regulation of stem cell differentiation	4	0.486618	0.0255486	ENSMUSG00000026923, ENSMUSG00000022528, ENSMUSG00000003119, ENSMUSG00000072244	706	13	13864	6.04228	1	1	0.996091
GOTERM_BP_DIRECT	GO:0007076	mitotic chromosome condensation	4	0.486618	0.0255486	ENSMUSG00000002625, ENSMUSG00000038252, ENSMUSG00000035024, ENSMUSG00000024045	706	13	13864	6.04228	1	1	0.996091
GOTERM_BP_DIRECT	GO:0070932	histone H3 deacetylation	4	0.486618	0.0255486	ENSMUSG00000028820, ENSMUSG00000020893, ENSMUSG00000055866, ENSMUSG00000025138	706	13	13864	6.04228	1	1	0.996091
GOTERM_BP_DIRECT	GO:1902287	semaphorin-plexin signaling pathway involved in axon guidance	4	0.486618	0.0255486	ENSMUSG00000031398, ENSMUSG00000036606, ENSMUSG00000034684, ENSMUSG00000053646	706	13	13864	6.04228	1	1	0.996091
GOTERM_BP_DIRECT	GO:0097150	neuronal stem cell population maintenance	5	0.608273	0.0271435	ENSMUSG00000026923, ENSMUSG00000022528, ENSMUSG00000037020, ENSMUSG00000037364, ENSMUSG00000074637	706	23	13864	4.269	1	1	0.996091
GOTERM_BP_DIRECT	GO:0040029	regulation of gene expression, epigenetic	4	0.486618	0.0313144	ENSMUSG00000055148, ENSMUSG00000031161, ENSMUSG00000008855, ENSMUSG00000039834	706	14	13864	5.61068	1	1	0.996091
GOTERM_BP_DIRECT	GO:0045444	fat cell differentiation	9	1.09489	0.0314553	ENSMUSG00000055024, ENSMUSG00000026826, ENSMUSG00000037868, ENSMUSG00000003032, ENSMUSG00000028341, ENSMUSG00000023034, ENSMUSG00000071637, ENSMUSG00000031755, ENSMUSG00000021013	706	73	13864	2.42105	1	1	0.996091
GOTERM_BP_DIRECT	GO:0001932	regulation of protein phosphorylation	8	0.973236	0.0318129	ENSMUSG00000036606, ENSMUSG00000026193, ENSMUSG00000053113, ENSMUSG00000041936, ENSMUSG00000059201, ENSMUSG00000023473, ENSMUSG00000029071, ENSMUSG00000060216	706	60	13864	2.61832	1	1	0.996091
GOTERM_BP_DIRECT	GO:0032922	circadian regulation of gene expression	8	0.973236	0.0318129	ENSMUSG00000034160, ENSMUSG00000039630, ENSMUSG00000020889, ENSMUSG00000024454, ENSMUSG00000028957, ENSMUSG00000020893, ENSMUSG00000055866, ENSMUSG00000030103	706	60	13864	2.61832	1	1	0.996091
GOTERM_BP_DIRECT	GO:0051415	interphase microtubule nucleation by interphase microtubule organizing center	3	0.364964	0.0337874	ENSMUSG00000000759, ENSMUSG00000027263, ENSMUSG00000033790	706	6	13864	9.8187	1	1	0.996091
GOTERM_BP_DIRECT	GO:0035020	regulation of Rac protein signal transduction	3	0.364964	0.0337874	ENSMUSG00000033335, ENSMUSG00000032356, ENSMUSG00000034160	706	6	13864	9.8187	1	1	0.996091
GOTERM_BP_DIRECT	GO:0000395	mRNA 5'-splice site recognition	3	0.364964	0.0337874	ENSMUSG00000029439, ENSMUSG00000035597, ENSMUSG00000018379	706	6	13864	9.8187	1	1	0.996091
GOTERM_BP_DIRECT	GO:0030534	adult behavior	6	0.729927	0.0342484	ENSMUSG00000038738, ENSMUSG00000028341, ENSMUSG00000051510, ENSMUSG00000021198, ENSMUSG00000031755, ENSMUSG00000011751	706	36	13864	3.2729	1	1	0.996091
GOTERM_BP_DIRECT	GO:0003281	ventricular septum development	6	0.729927	0.0342484	ENSMUSG00000033335, ENSMUSG00000054387, ENSMUSG00000028195, ENSMUSG00000022528, ENSMUSG00000057110, ENSMUSG00000020289	706	36	13864	3.2729	1	1	0.996091
GOTERM_BP_DIRECT	GO:0042993	positive regulation of transcription factor import into nucleus	4	0.486618	0.0377003	ENSMUSG00000024454, ENSMUSG00000031328, ENSMUSG00000031834, ENSMUSG00000005566	706	15	13864	5.23664	1	1	0.996091
GOTERM_BP_DIRECT	GO:1900153	positive regulation of nuclear-transcribed mRNA catabolic process, deadenylation-dependent decay	4	0.486618	0.0377003	ENSMUSG00000052707, ENSMUSG00000021127, ENSMUSG00000044786, ENSMUSG00000025571	706	15	13864	5.23664	1	1	0.996091
GOTERM_BP_DIRECT	GO:0051493	regulation of cytoskeleton organization	4	0.486618	0.0377003	ENSMUSG00000024290, ENSMUSG00000024969, ENSMUSG00000029094, ENSMUSG00000053646	706	15	13864	5.23664	1	1	0.996091
GOTERM_BP_DIRECT	GO:0060071	Wnt signaling pathway, planar cell polarity pathway	4	0.486618	0.0377003	ENSMUSG00000022568, ENSMUSG00000079487, ENSMUSG00000020888, ENSMUSG00000029071	706	15	13864	5.23664	1	1	0.996091
GOTERM_BP_DIRECT	GO:0008104	protein localization	9	1.09489	0.0387145	ENSMUSG00000044037, ENSMUSG00000027284, ENSMUSG00000024163, ENSMUSG00000039166, ENSMUSG00000026213, ENSMUSG00000002496, ENSMUSG00000040860, ENSMUSG00000029512, ENSMUSG00000031755	706	76	13864	2.32548	1	1	0.996091
GOTERM_BP_DIRECT	GO:0002042	cell migration involved in sprouting angiogenesis	4	0.486618	0.044695	ENSMUSG00000033730, ENSMUSG00000015605, ENSMUSG00000023034, ENSMUSG00000023951	706	16	13864	4.90935	1	1	0.996091
GOTERM_BP_DIRECT	GO:0080182	histone H3-K4 trimethylation	4	0.486618	0.044695	ENSMUSG00000034160, ENSMUSG00000006307, ENSMUSG00000040943, ENSMUSG00000039834	706	16	13864	4.90935	1	1	0.996091
GOTERM_BP_DIRECT	GO:1900745	positive regulation of p38MAPK cascade	4	0.486618	0.044695	ENSMUSG00000020700, ENSMUSG00000059201, ENSMUSG00000015312, ENSMUSG00000023951	706	16	13864	4.90935	1	1	0.996091
GOTERM_BP_DIRECT	GO:0007020	microtubule nucleation	4	0.486618	0.044695	ENSMUSG00000000759, ENSMUSG00000027263, ENSMUSG00000033790, ENSMUSG00000024542	706	16	13864	4.90935	1	1	0.996091
GOTERM_BP_DIRECT	GO:0035264	multicellular organism growth	11	1.3382	0.045533	ENSMUSG00000021127, ENSMUSG00000001151, ENSMUSG00000055148, ENSMUSG00000023051, ENSMUSG00000021198, ENSMUSG00000054051, ENSMUSG00000074733, ENSMUSG00000021013, ENSMUSG00000054611, ENSMUSG00000021268, ENSMUSG00000030400	706	107	13864	2.0188	1	1	0.996091
GOTERM_BP_DIRECT	GO:0061469	regulation of type B pancreatic cell proliferation	3	0.364964	0.045731	ENSMUSG00000020889, ENSMUSG00000028341, ENSMUSG00000023034	706	7	13864	8.41603	1	1	0.996091
GOTERM_BP_DIRECT	GO:0010837	regulation of keratinocyte proliferation	3	0.364964	0.045731	ENSMUSG00000021127, ENSMUSG00000044786, ENSMUSG00000016921	706	7	13864	8.41603	1	1	0.996091
GOTERM_BP_DIRECT	GO:0045657	positive regulation of monocyte differentiation	3	0.364964	0.045731	ENSMUSG00000021127, ENSMUSG00000052684, ENSMUSG00000022185	706	7	13864	8.41603	1	1	0.996091
GOTERM_BP_DIRECT	GO:0045616	regulation of keratinocyte differentiation	3	0.364964	0.045731	ENSMUSG00000021127, ENSMUSG00000044786, ENSMUSG00000024290	706	7	13864	8.41603	1	1	0.996091
GOTERM_BP_DIRECT	GO:0043113	receptor clustering	5	0.608273	0.0458981	ENSMUSG00000034656, ENSMUSG00000041936, ENSMUSG00000029071, ENSMUSG00000031328, ENSMUSG00000067629	706	27	13864	3.63655	1	1	0.996091
GOTERM_BP_DIRECT	GO:0002092	positive regulation of receptor internalization	5	0.608273	0.0458981	ENSMUSG00000026582, ENSMUSG00000022150, ENSMUSG00000023951, ENSMUSG00000060216, ENSMUSG00000019986	706	27	13864	3.63655	1	1	0.996091
GOTERM_BP_DIRECT	GO:0031047	gene silencing by RNA	7	0.851582	0.0473452	ENSMUSG00000052707, ENSMUSG00000063804, ENSMUSG00000025571, ENSMUSG00000023051, ENSMUSG00000037364, ENSMUSG00000056167, ENSMUSG00000042500	706	52	13864	2.6435	1	1	0.996091
GOTERM_BP_DIRECT	GO:0007605	sensory perception of sound	12	1.45985	0.0485809	ENSMUSG00000022483, ENSMUSG00000052512, ENSMUSG00000030516, ENSMUSG00000024330, ENSMUSG00000028631, ENSMUSG00000039137, ENSMUSG00000027966, ENSMUSG00000025401, ENSMUSG00000031565, ENSMUSG00000022114, ENSMUSG00000074637, ENSMUSG00000011751	706	123	13864	1.91584	1	1	0.996091
GOTERM_CC_DIRECT	GO:0005634	nucleus	360	43.7956	4.7213e-14	ENSMUSG00000034748, ENSMUSG00000023051, ENSMUSG00000024381, ENSMUSG00000028869, ENSMUSG00000005621, ENSMUSG00000026207, ENSMUSG00000058392, ENSMUSG00000029833, ENSMUSG00000044786, ENSMUSG00000024943, ENSMUSG00000044783, ENSMUSG00000097767, ENSMUSG00000024949, ENSMUSG00000022528, ENSMUSG00000039630, ENSMUSG00000022529, ENSMUSG00000017724, ENSMUSG00000105340, ENSMUSG00000018379, ENSMUSG00000073436,…	737	5322	14932	1.3705	2.33563e-11	2.33704e-11	2.28039e-11
GOTERM_CC_DIRECT	GO:0005654	nucleoplasm	163	19.8297	1.38109e-13	ENSMUSG00000028582, ENSMUSG00000038705, ENSMUSG00000034748, ENSMUSG00000025199, ENSMUSG00000068917, ENSMUSG00000022000, ENSMUSG00000008855, ENSMUSG00000021156, ENSMUSG00000024422, ENSMUSG00000020069, ENSMUSG00000020863, ENSMUSG00000027936, ENSMUSG00000024943, ENSMUSG00000022528, ENSMUSG00000024949, ENSMUSG00000039630, ENSMUSG00000020747, ENSMUSG00000069565, ENSMUSG00000022529, ENSMUSG00000105340,…	737	1872	14932	1.76414	6.83653e-11	3.41819e-11	3.33532e-11
GOTERM_CC_DIRECT	GO:0016607	nuclear speck	36	4.37956	2.74336e-11	ENSMUSG00000030002, ENSMUSG00000024560, ENSMUSG00000015748, ENSMUSG00000028248, ENSMUSG00000022185, ENSMUSG00000024561, ENSMUSG00000024287, ENSMUSG00000068917, ENSMUSG00000022000, ENSMUSG00000024325, ENSMUSG00000021134, ENSMUSG00000022961, ENSMUSG00000020863, ENSMUSG00000028809, ENSMUSG00000004815, ENSMUSG00000034120, ENSMUSG00000034681, ENSMUSG00000018379, ENSMUSG00000039218, ENSMUSG00000029068,…	737	196	14932	3.72132	1.35796e-08	4.52654e-09	4.4168e-09
GOTERM_CC_DIRECT	GO:0005681	spliceosomal complex	25	3.04136	4.62545e-08	ENSMUSG00000031134, ENSMUSG00000015748, ENSMUSG00000032580, ENSMUSG00000021494, ENSMUSG00000024422, ENSMUSG00000021413, ENSMUSG00000024949, ENSMUSG00000039630, ENSMUSG00000028809, ENSMUSG00000034120, ENSMUSG00000018379, ENSMUSG00000059208, ENSMUSG00000032621, ENSMUSG00000039218, ENSMUSG00000007850, ENSMUSG00000004980, ENSMUSG00000027881, ENSMUSG00000063511, ENSMUSG00000025982, ENSMUSG00000010608,…	737	136	14932	3.72436	2.28957e-05	5.72399e-06	5.58523e-06
[truncated: 87 more rows]

## Sheet: GOKEGG DOWN
Category	GO Number	Term	Count	%	PValue	Genes	List Total	Pop Hits	Pop Total	Fold Enrichment	Bonferroni	Benjamini	FDR
[truncated: 132 more rows]
